# Supplementary material for: Zn/F carbenoids: preparation, structures, stability, and application to nucleophilic monofluoroalkylation
Source: Royal Society of Chemistry journal article supplement (doi:10.1039/d4qo00648h), 2024-01-01
Supplement: d4qo00648h1.pdf [file d4qo00648h1.pdf]

Electronic Supplementary Information for

**Zn/F Carbenoids:**

**Preparation, Stability, Structures, and Application to Nucleophilic Monofluoroalkylation**

Kazuhiro Morisaki,\* Kohei Miyamoto, Emiko Kawaguchi, Yoshihiro Sato\*

Faculty of Pharmaceutical Sciences, Hokkaido University, Sapporo 060-0812, Japan

Email address: kmorisaki@pharm.hokudai.ac.jp, biyo@pharm.hokudai.ac.jp

Table of Contents

|     |                                                                                                    |      |
|-----|----------------------------------------------------------------------------------------------------|------|
| 1.  | General Experimental Details                                                                       | S3   |
| 2.  | Preparation of the Substrates and Reagents                                                         | S4   |
| 3.  | Preparation Zinc/Fluorine Carbenoids                                                               | S9   |
| 4.  | Computational Studies                                                                              | S13  |
| 5.  | Kinetic Analysis of Zinc/Fluorine Carbenoids Using NMR spectroscopy                                | S17  |
| 6.  | Optimization of the Conditions for Acylation of Zinc/Fluorine Carbenoids                           | S27  |
| 7.  | Procedures of Copper-Mediated Nucleophilic Monofluoroalkylation and Identification of the Products | S28  |
| 8.  | References in Supporting Information                                                               | S49  |
| 9.  | NMR and Mass Spectra of the Literature New Compounds                                               | S50  |
| 10. | Cartesian Coordinates of the Optimized Structures Obtained from DFT Calculations                   | S212 |

## Abbreviation

|       |                                   |
|-------|-----------------------------------|
| THF   | tetrahydrofuran                   |
| DMF   | <i>N,N</i> -dimethyl formamide    |
| TLC   | thin-layer chromatography         |
| NMR   | nuclear magnetic resonance        |
| TMS   | trimethylsilyl                    |
| HRMS  | high resolution mass spectroscopy |
| EtOAc | ethyl acetate                     |
| Trt   | trityl                            |
| Et    | ethyl                             |
| Me    | methyl                            |
| Ph    | phenyl                            |
| TIPS  | triisopropyl                      |
| TBDPS | <i>tert</i> -butyldiphenylsilyl   |
| Bn    | benzyl                            |
| Ts    | <i>para</i> -toluenesulfonyl      |

## 1. General Experimental Details

All manipulations employing alkylzinc species were performed under N<sub>2</sub> atmosphere unless stated otherwise using Schlenk technique or nitrogen-filled Glove Box (MBrown, LABSTAR). Solvents were purified under N<sub>2</sub> using The Ultimate Solvent System (Glass Counter) (THF, Et<sub>2</sub>O, DMF, toluene). Flash silica gel column chromatography was conducted with Wakogel<sup>®</sup> FC-40. Preparative TLC was performed on precoated plates (AS ONE, Silica Gel 60 Plate F254, 0.5 mm). Nuclear magnetic resonance (NMR) spectra were acquired on JEOL ECS-400 (400 MHz), JEOL ECX-400P (400 MHz), ECZ-400 (400 MHz), or JEOL ECZ-500R (500 MHz). <sup>1</sup>H NMR chemical shifts are reported in ppm and referenced to residual solvent peaks as internal standards (CDCl<sub>3</sub>: 7.26 ppm and dimethylformamide-*d*<sub>7</sub>: 7.96 ppm). Coupling constants are reported in hertz and *J* represents <sup>3</sup>J<sub>H-H</sub> unless otherwise noted. The following abbreviations are used: s = singlet, d = doublet, t = triplet, q = quartet, m = multiplet, br = broad. <sup>13</sup>C{<sup>1</sup>H} NMR chemical shifts are reported in ppm and referenced to residual solvent peaks as internal standards (CDCl<sub>3</sub>: 77.16 ppm and dimethylformamide-*d*<sub>7</sub>: 162.62 ppm). <sup>19</sup>F NMR chemical shifts are reported in ppm and referenced to hexafluorobenzene as external standards (-164.90 ppm). High-resolution mass spectroscopy (HRMS) was obtained with Thermo Scientific Exactive mass spectrometers for ESI-MS or JMS-T2000 GC for EI-MS. Zinc powder (Kanto Chemical Co. Inc., 1st Grade) was activated by dibromoethane and TMSCl in THF and then dried under vacuum.

## 2. Preparation of the Substrates and Reagents

1-Fluoro-1-haloalkanes **1a-I**<sup>S1</sup>, **1a-Br**<sup>S1</sup>, **1b-I**<sup>S2</sup>, **1c-I**<sup>S1</sup>, **1e-I**<sup>S1</sup> and **1f-I**<sup>S3</sup> are described in the literature but not fully characterized. **1g-Br**<sup>S4</sup> were literature known compounds and prepared according to the literature procedure. These 1-fluoro-1-iodoalkane were thermally stable and resistant to moisture, silica gel, and light. In most cases, the total yield of the four-step preparation was about 30%. **1d-I** was prepared according to the literature procedure.<sup>S2</sup> For literature known 1-Fluoro-1-haloalkanes, <sup>1</sup>H, <sup>13</sup>C, and <sup>19</sup>F NMR were described below. Electrophiles (except for acyl dithiocarbamate derivatives) were literature known compounds or commercially available compounds.

### 2.1 NMR spectra of 1-Fluoro-1-haloalkanes

#### (4-fluoro-4-iodobutyl)benzene (**1a-I**)

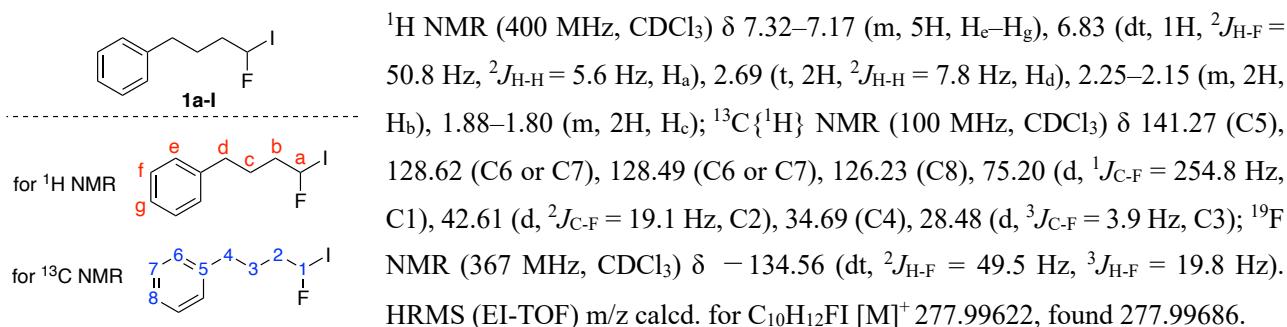

#### (3-fluoro-3-iodopropyl)benzene (**1b-I**)

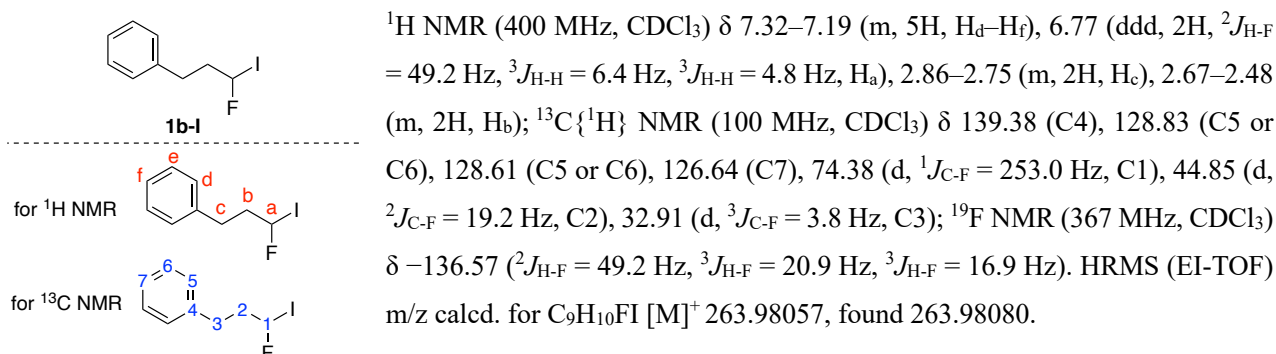

#### 2-(2-fluoro-2-iodoethyl)naphthalene (**1c-I**)

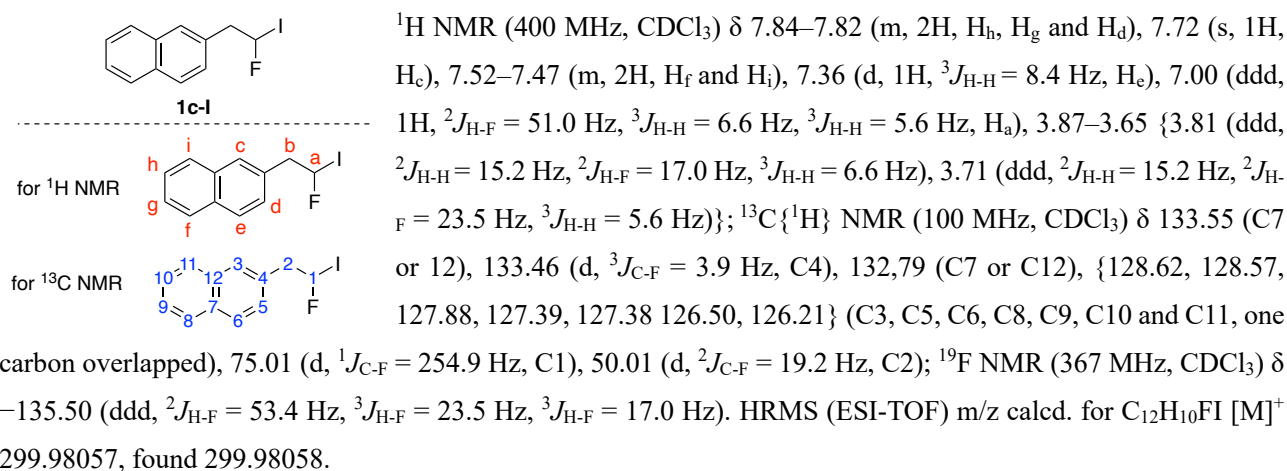



### 11-fluoro-11-iodoundec-1-ene (**1d-I**)

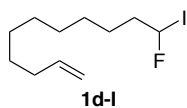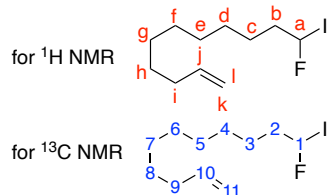

$^1\text{H}$  NMR (400 MHz,  $\text{CDCl}_3$ )  $\delta$  6.82 (dt, 1H,  $^2J_{\text{H-F}} = 49.6$  Hz,  $^3J_{\text{H-F}} = 5.4$  Hz,  $\text{H}_a$ ), 5.80 (ddt,  $^3J_{\text{H-H}} = 17.0$  Hz,  $^3J_{\text{H-H}} = 10.4$  Hz,  $^3J_{\text{H-H}} = 6.4$  Hz, 1H,  $\text{H}_j$ ), 4.98 (dd, 1H,  $^3J_{\text{H-H}} = 17.0$  Hz,  $^3J_{\text{H-H}} = 2.0$  Hz,  $\text{H}_k$ ), 4.92 (dd, 1H,  $^3J_{\text{H-H}} = 10.4$  Hz,  $^3J_{\text{H-H}} = 2.0$  Hz,  $\text{H}_i$ ), 2.33–2.12 (m, 2H,  $\text{H}_b$ ), 2.04 (dt, 2H,  $^3J_{\text{H-H}} = 7.6$  Hz,  $^3J_{\text{H-H}} = 6.4$  Hz,  $\text{H}_i$ ), 1.49–1.29 (m, 12H,  $\text{H}_c$ – $\text{H}_h$ );  $^{13}\text{C}\{^1\text{H}\}$  NMR (100 MHz,  $\text{CDCl}_3$ )  $\delta$  139.29 (C10), 114.33 (C11), 75.90 (d, C1, coupling constant cannot be determined due to overlapping with the other peak), 43.42 (d,  $^2J_{\text{C-F}} = 18.2$  Hz, C2), 43.24 (C9), {33.92, 29.42, 29.17, 29.02, 28.57} (C4, C5, C6, C7 and C8), 26.86 (d,  $^3J_{\text{C-F}} =$

3.8 Hz, C3);  $^{19}\text{F}$  NMR (367 MHz,  $\text{CDCl}_3$ )  $\delta$  -134.01. (dt,  $^2J_{\text{H-F}} = 49.6$  Hz,  $^3J_{\text{H-F}} = 25.5$  Hz). HRMS (EI-TOF)  $m/z$  calcd. for  $\text{C}_{11}\text{H}_{20}\text{FI} [\text{M}]^+$  298.05882, found 298.05963.

### ((3-fluoro-3-iodopropoxy)methyl)benzene (**1e-I**)

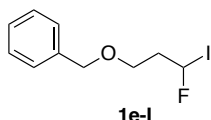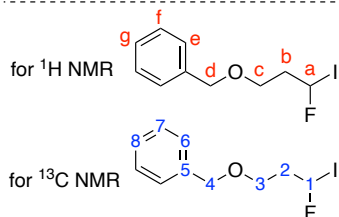

$^1\text{H}$  NMR (400 MHz,  $\text{CDCl}_3$ )  $\delta$  7.38–7.28 (m, 5H,  $\text{H}_e$ – $\text{H}_g$ ), 6.99 (dt, 1H,  $^3J_{\text{H-H}} = 48.4$  Hz,  $^3J_{\text{H-H}} = 6.0$  Hz,  $\text{H}_a$ ), 4.51 (s, 2H,  $\text{H}_d$ ), 3.68–3.47 (m, 2H,  $\text{H}_c$ ), 2.66–2.44 (m, 2H,  $\text{H}_b$ );  $^{13}\text{C}\{^1\text{H}\}$  NMR (100 MHz,  $\text{CDCl}_3$ )  $\delta$  137.93 (C5), 128.62 (C6 or C7), 127.98 (C8), 127.84 (C6 or C7), 73.67 (d,  $^1J_{\text{C-F}} = 256.5$  Hz, C1), 73.38 (C4), 66.85 (d,  $^3J_{\text{C-F}} = 4.8$  Hz, C3), 43.74 (d,  $^2J_{\text{C-F}} = 20.0$  Hz, C2);  $^{19}\text{F}$  NMR (367 MHz,  $\text{CDCl}_3$ )  $\delta$  -138.64 (ddd,  $^2J_{\text{H-F}} = 48.4$  Hz,  $^3J_{\text{H-F}} = 22.4$  Hz,  $^3J_{\text{H-F}} = 13.9$  Hz). HRMS (EI-TOF)  $m/z$  calcd. for  $\text{C}_{10}\text{H}_{12}\text{FIO} [\text{M}]^+$  293.99114, found 293.99161.

### *N*-(3-fluoro-3-iodopropyl)-4-methyl-*N*-phenylbenzenesulfonamide (**1f-I**)

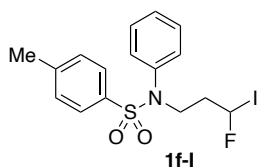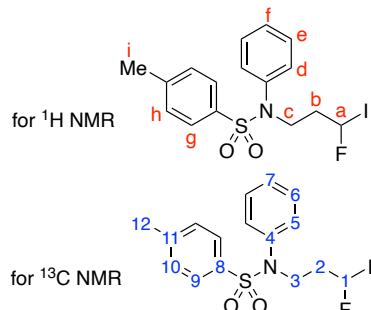

$^1\text{H}$  NMR (400 MHz,  $\text{CDCl}_3$ )  $\delta$  7.46 (d, 2H  $^3J_{\text{H-H}} = 8.4$  Hz,  $\text{H}_g$ ), 7.35–7.31 (m, 3H,  $\text{H}_e$  and  $\text{H}_f$ ), 7.26 (d, 2H,  $^3J_{\text{H-H}} = 8.4$  Hz,  $\text{H}_h$ ), 7.05–7.03 (m, 2H,  $\text{H}_d$ ), 6.89 (ddd, 1H,  $^2J_{\text{H-F}} = 48.1$  Hz,  $^3J_{\text{H-F}} = 6.4$  Hz,  $^3J_{\text{H-F}} = 5.2$  Hz,  $\text{H}_a$ ), 3.77–3.60 (m, 2H,  $\text{H}_c$ ), 2.59–2.35 (m, 2H,  $\text{H}_b$ ), 2.43 (s, 3H,  $\text{H}_i$ );  $^{13}\text{C}\{^1\text{H}\}$  NMR (100 MHz,  $\text{CDCl}_3$ )  $\delta$  143.89 (C4), 139.06 (C8), 134.64 (C11), {129.65, 129.41, 128.68, 128.41, 127.85} (C5, C6, C7, C9 and C10), 70.59 (d,  $^1J_{\text{C-F}} = 252.1$  Hz, C1), 48.19 (d,  $^3J_{\text{C-F}} = 3.9$  Hz, C3), 42.43 (d,  $^2J_{\text{C-F}} = 20.1$  Hz, C2), 21.70 (C12);  $^{19}\text{F}$  NMR (367 MHz,  $\text{CDCl}_3$ )  $\delta$  -138.80. (ddd,  $^2J_{\text{H-F}} = 48.1$  Hz,  $^3J_{\text{H-F}} = 21.3$  Hz,  $^3J_{\text{H-F}} = 16.9$  Hz). HRMS (ESI-TOF)  $m/z$  calcd. for  $\text{C}_{16}\text{H}_{17}\text{O}_2\text{NFINaS} [\text{M} + \text{Na}]^+$  455.99009, found 455.98978.



## 2.2 General Procedure for Synthesis of Acyl Dithiocarbamate Derivatives

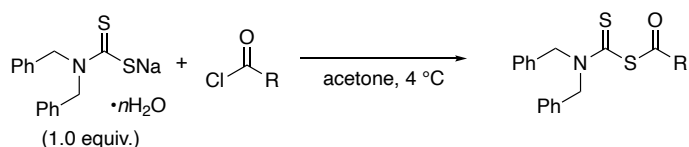

To the 100 mL flask equipped with a magnetic stir bar were added sodium dibenzylthiocarbamate hydrate (1.0 equiv.) and acetone (dehydrated, 0.075 M). After the solution was cooled to 4 °C, acid chloride was added to the solution. The reaction was then quenched by the addition of sat. NaHCO<sub>3</sub> aq. and the resulted solution was extracted by Et<sub>2</sub>O by three times. The combined organic phase was washed with brine, dried over Na<sub>2</sub>SO<sub>4</sub>, concentrated under reduced pressure, and purified by column chromatography.

### dibenzylcarbamothioic 3-phenylpropanoic thioanhydride (**7r**)

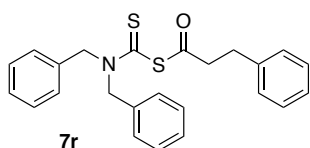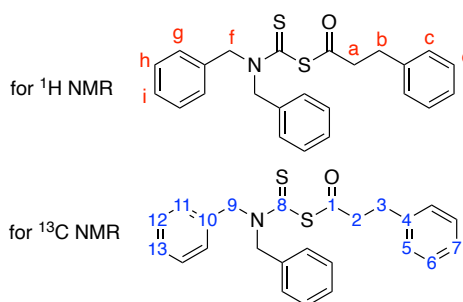

The reaction was performed according to the general procedure using 3-phenylpropionyl chloride (450 μL, 3.00 mmol). The reaction time was 15 min and the obtained crude mixture was purified by silica gel column chromatography using hexane/EtOAc = 10/1 as an eluent to give the titled compound as pale brown sticky oil (654 mg, 54% yield). <sup>1</sup>H NMR (400 MHz, CDCl<sub>3</sub>) δ 7.39–7.24 (m, 10H, H<sub>e</sub>–H<sub>g</sub>), 5.08 (s, 4H, H<sub>d</sub>), 1.99 (tt, 1H, <sup>3</sup>J<sub>H–H</sub> = 8.0 Hz, <sup>3</sup>J<sub>H–H</sub> = 4.0 Hz, H<sub>a</sub>), 1.28–1.24 (m, 2H, H<sub>b</sub> or H<sub>c</sub>), 1.06–1.01 (m, 2H, H<sub>b</sub> or H<sub>c</sub>); <sup>13</sup>C {<sup>1</sup>H} NMR (100 MHz, CDCl<sub>3</sub>) δ 192.50 (C1), 185.20 (C8), {139.38, 134.57, 129.07, 128.76, 128.47, 128.24, 127.74, 126.72} (C4, C5, C6, C7, C10, C11, C12 and C13), 56.46 (C9), 45.51 (C3), 31.37 (C2). HRMS (ESI-TOF) m/z calcd.

for C<sub>24</sub>H<sub>23</sub>ONNaS<sub>2</sub> [M + Na]<sup>+</sup> 428.11133, found 428.11065.

### benzoic dibenzylcarbamothioic thioanhydride (**7s**)

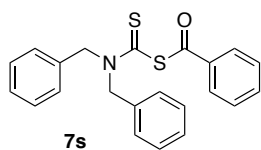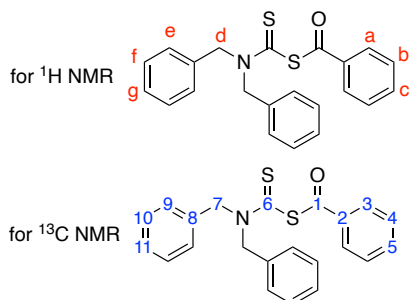

The reaction was performed according to the general procedure using benzoyl bromide (0.36 mL, 3.00 mmol). The reaction time was 15 min and the obtained crude mixture was purified by silica gel column chromatography using hexane/EtOAc = 10/1 as an eluent to give the titled compound as yellow solid (952 mg, 84% yield).

<sup>1</sup>H NMR (400 MHz, CDCl<sub>3</sub>) δ 7.45–7.33 (m, 15H, H<sub>a</sub>–H<sub>c</sub> and H<sub>e</sub>–H<sub>g</sub>), 5.17 (s, 4H, H<sub>d</sub>); <sup>13</sup>C {<sup>1</sup>H} NMR (100 MHz, CDCl<sub>3</sub>) δ 186.46 (C1), 185.29 (C6), {135.69, 134.62, 134.44, 129.11, 129.08, 128.25, 127.95, 127.79} (C2, C3, C4, C5, C8, C9, C10 and C11), 57.50–56.00 (br, C7). HRMS (ESI-TOF) m/z calcd. for C<sub>22</sub>H<sub>19</sub>ONNaS<sub>2</sub> [M + Na]<sup>+</sup> 400.08003, found 400.07997.

### dibenzylcarbamothioic cyclopropanecarboxylic thioanhydride (**7t**)

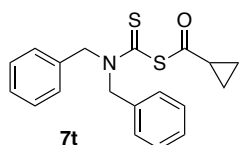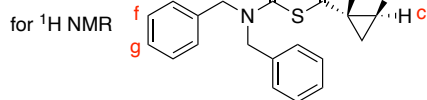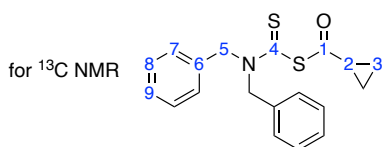

The reaction was performed according to the general procedure using cyclopropanecarbonyl chloride (182  $\mu\text{L}$ , 2.00 mmol). The reaction time was 30 min and the obtained crude mixture was purified by silica gel column chromatography using hexane/EtOAc = 10/1 as an eluent to give **7t** as pale brown sticky oil (579 mg, 85% yield).

$^1\text{H}$  NMR (400 MHz,  $\text{CDCl}_3$ )  $\delta$  7.39–7.24 (m, 10H,  $\text{H}_e\text{--H}_g$ ), 5.08 (s, 4H,  $\text{H}_d$ ), 1.99 (tt, 1H,  $^3J_{\text{H--H}} = 8.0$  Hz,  $^3J_{\text{H--H}} = 4.0$  Hz,  $\text{H}_a$ ), 1.28–1.24 (m, 2H,  $\text{H}_b$  or  $\text{H}_c$ ), 1.06–1.01 (m, 2H,  $\text{H}_b$  or  $\text{H}_c$ );  $^{13}\text{C}\{^1\text{H}\}$  NMR (100 MHz,  $\text{CDCl}_3$ )  $\delta$  193.27 (C1), 185.50 (C4), 134.67 (C6), {129.06, 128.21, 127.77} (C7, C8, and C9), 56.51 (C5), 22.75 (C2), 11.88 (C3). HRMS (ESI-TOF)  $m/z$  calcd. for  $\text{C}_{19}\text{H}_{19}\text{ONNaS}_2$  [ $\text{M} + \text{Na}$ ] $^+$  364.08003, found 364.07920.

#### dibenzylcarbamothioic 3-(methylthio)propanoic thioanhydride (**7u**)

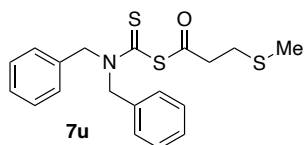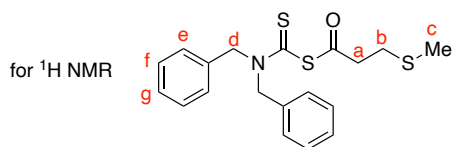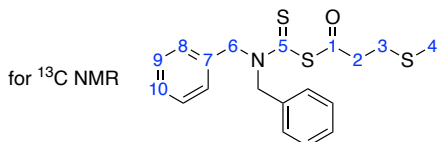

The reaction was performed according to the general procedure using 3-(methylthio)propanoyl chloride (116  $\mu\text{L}$ , 2.00 mmol). The reaction time was 1 h and the obtained crude mixture was purified by silica gel column chromatography using hexane/EtOAc = 20/1 as an eluent to give **7u** as pale brown sticky oil (141 mg, 19% yield).

$^1\text{H}$  NMR (400 MHz,  $\text{CDCl}_3$ )  $\delta$  7.38–7.25 (m, 10H,  $\text{H}_e\text{--H}_g$ ), 5.09 (s, 4H,  $\text{H}_d$ ) 2.95–2.91 (m, 2H,  $\text{H}_a$ ), 2.82–2.78 (m, 2H,  $\text{H}_b$ ), 2.09 (s, 3H,  $\text{H}_c$ );  $^{13}\text{C}\{^1\text{H}\}$  NMR (100 MHz,  $\text{CDCl}_3$ )  $\delta$  191.74 (C1), 184.80 (C5), 134.59 (C7), 129.08 (C8 or C9), 128.25 (C10), 127.74 (C8 or C9), 56.58 (C6), 43.61 (C2), 29.36 (C3), 15.77 (C4). We could not obtain the corresponding HRMS spectra of **7u** in EI- nor ESI-MS analyses probably due to the lability of **7u** in ionized form.

#### dibenzylcarbamothioic 3-(methylthio)propanoic thioanhydride (**7v**)

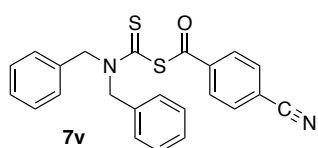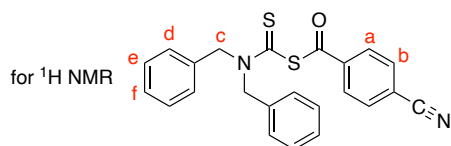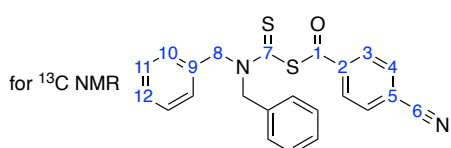

The reaction was performed according to the general procedure using 4-cyanobenzoyl chloride (331 mg, 2.00 mmol). The reaction time was 30 min and the obtained crude mixture was purified by silica gel column chromatography using hexane/EtOAc = 10/1 as an eluent to give **7v** as pale brown sticky oil (201 mg, 25% yield).

$^1\text{H}$  NMR (400 MHz,  $\text{CDCl}_3$ )  $\delta$  8.01 (d, 2H,  $^3J_{\text{H--H}} = 8.4$  Hz,  $\text{H}_b$ ), 7.77 (d, 2H,  $^3J_{\text{H--H}} = 8.4$  Hz,  $\text{H}_a$ ), 7.43–7.30 (m, 10H,  $\text{H}_d\text{--H}_f$ ), 5.14 (s, 4H,  $\text{H}_c$ );  $^{13}\text{C}\{^1\text{H}\}$  NMR (100 MHz,  $\text{CDCl}_3$ )  $\delta$  185.28 (C1), 183.31 (C7), {138.95, 134.37, 132.85, 129.15, 128.38, 128.30, 127.73, 117.62, 117.50} (C2, C3, C4, C5, C6, C9, C10, C11, and C12), 56.80 (C8). HRMS (ESI-TOF)  $m/z$  calcd. for  $\text{C}_{23}\text{H}_{18}\text{ON}_2\text{NaS}_2$  [ $\text{M} + \text{Na}$ ] $^+$  425.07528, found 425.07461.

(Z)-dibenzylcarbamothioic oleic thioanhydride (**7w**)

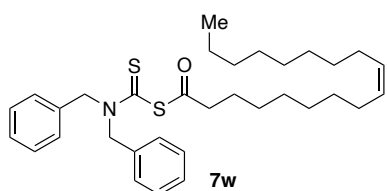

The reaction was performed according to the general procedure using oleic chloride (660  $\mu$ L, 3.00 mmol). The reaction time was 1 h and the obtained crude mixture was purified by silica gel column chromatography using hexane/EtOAc = 30/1 as an eluent to give **7w** as pale brown sticky oil (484 mg, 84% yield).

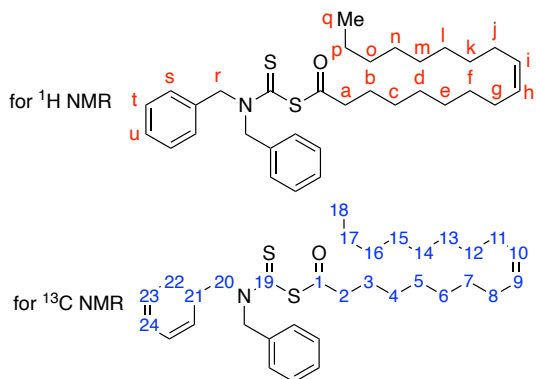

$^1\text{H}$  NMR (500 MHz,  $\text{CDCl}_3$ )  $\delta$  7.39–7.25 (m, 10H,  $\text{H}_s$ – $\text{H}_u$ ), 5.38–5.29 (m, 2H,  $\text{H}_h$  and  $\text{H}_i$ ), 5.09 (s, 4H,  $\text{H}_r$ ), 2.63 (t, 2H,  $^3J_{\text{H-H}} = 7.5$  Hz,  $\text{H}_a$ ), 2.03–1.98 (m, 4H,  $\text{H}_j$  and  $\text{H}_g$ ), 1.71–1.68 (m, 2H,  $\text{H}_b$ ), 1.60–1.40 (m, 20H,  $\text{H}_c$ – $\text{H}_f$  and  $\text{H}_k$ – $\text{H}_p$ ), 0.89 (t, 3H,  $^3J_{\text{H-H}} = 7.0$  Hz,  $\text{H}_q$ );  $^{13}\text{C}$  { $^1\text{H}$ } NMR (125 MHz,  $\text{CDCl}_3$ )  $\delta$  193.19 (C1), 185.64 (C19), 134.59 (C21), 130.10 (C9 or C10), 129.72 (C9 or C10), 129.01 (C22 or C23), 128.15 (C24), 127.69 (C22 or C23), 56.38 (C20), 44.07 (C2), {31.97, 31.66, 29.83, 29.69, 29.59, 29.39,

29.13, 20.04, 29.93, 27.29, 27.19, 25.40, 22.76, 14.21} (C3–C8 and C11–C18). HRMS (ESI-TOF)  $m/z$  calcd. for  $\text{C}_{33}\text{H}_{47}\text{ONNaS}_2$  [ $\text{M} + \text{Na}$ ] $^+$  560.29913, found 560.29860.

### 3. Preparation Zinc/Fluorine Carbenoids

#### 3.1 General Procedure for Preparation of Zinc/Fluorine Carbenoids

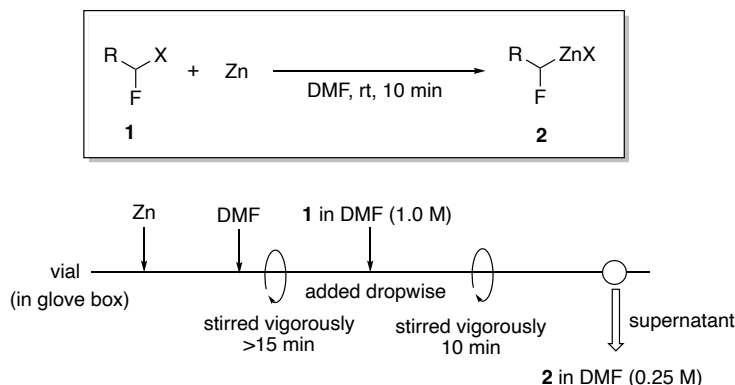

To the vial equipped with a magnetic stir bar were added activated zinc powder (2.0 equiv.) and DMF (dry, 3x mL). After the suspension was stirred vigorously at least 15 min, 1-fluoro-1-haloalkane **1** in DMF (1.00 M, x mL, x mmol) was added in dropwise to the suspension. The solution was further stirred for 10 min at room temperature and then stop stirring. The supernatant of the solution was carefully sucked by a syringe with a needle. The obtained DMF solution of **2** (0.25 M) was used for the next experiments.

#### 3.1 General Procedure for NMR Analysis of Zinc/Fluorine Carbenoids

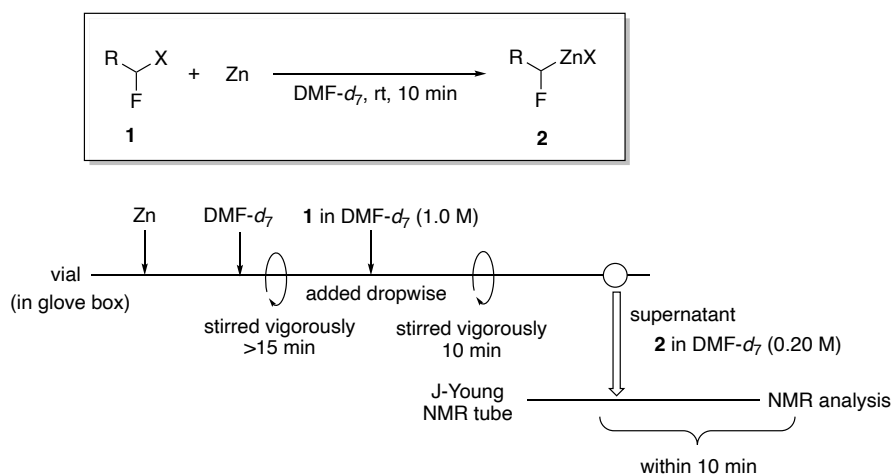

To the vial equipped with a magnetic stir bar were added activated zinc powder (13.1 mg, 0.20 mmol, 2.0 equiv.) and DMF- $d_7$  (dry, 0.40 mL). After the suspension was stirred vigorously at least 15 min, 1-fluoro-1-haloalkane **1** in DMF- $d_7$  (1.00 M, 0.10 mL, 0.10 mmol) was added in dropwise to the suspension. The solution was further stirred for 10 min at room temperature and then stop stirring. The supernatant of the solution was carefully transferred to J-Young-type NMR tube and the NMR tube was sealed tightly. The NMR tube was taken out from the glove box and rapidly used for NMR experiments.

(1-fluoro-4-phenylbutyl)zinc(II) iodide (**2a-I**)

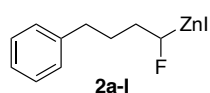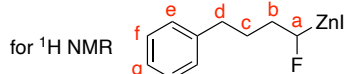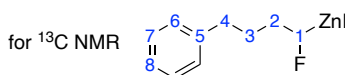

**2a-I** was prepared according to the general procedure for NMR analysis using **1a-I**. The relative ratio of monoalkylzinc and dialkylzinc (60:1) was determined by  $^{19}\text{F}$  NMR using the relative integration values of the peaks at  $-216.64$  ppm (for monoalkylzinc),  $-217.61$  (for dialkylzinc), and  $-217.63$  ppm (for dialkylzinc).

$^1\text{H}$  NMR (500 MHz,  $\text{DMF-}d_7$ )  $\delta$  7.26–7.12 (m, 5H,  $\text{H}_e\text{--H}_g$ ), 4.85 (ddd, 1H,  $^2J_{\text{H-F}} = 46.8$  Hz,  $^3J_{\text{H-H}} = 7.0$  Hz,  $^3J_{\text{H-H}} = 7.0$  Hz,  $\text{H}_a$ ), 2.64–2.56 (m, 2H,  $\text{H}_d$ ), 1.98–1.90 (m, 2H,  $\text{H}_b$ ), 1.79–1.68 (m, 2H,  $\text{H}_c$ );  $^{13}\text{C}\{^1\text{H}\}$  NMR (125 MHz,  $\text{DMF-}d_7$ )  $\delta$  143.65 (C5), 128.83 (C6 or C7), 128.63 (C6 or C7), 125.91 (C8), 104.44 (d,  $^1J_{\text{C-F}} = 167.8$  Hz, C1), 37.94 (d,  $^2J_{\text{C-F}} = 17.1$  Hz, C2), 36.31 (C4), 30.56 (d,  $^3J_{\text{C-F}} = 7.5$  Hz, C3);  $^{19}\text{F}$  NMR (470 MHz,  $\text{DMF-}d_7$ )  $\delta$   $-216.64$  (major, dt,  $^2J_{\text{H-F}} = 46.8$  Hz,  $^3J_{\text{H-F}} = 29.6$  Hz),  $-217.61$  (minor, dt,  $^2J_{\text{H-F}} = 47.0$  Hz,  $^3J_{\text{H-F}} = 30.5$  Hz),  $-217.63$  (minor, dt,  $^2J_{\text{H-F}} = 47.0$  Hz,  $^3J_{\text{H-F}} = 30.5$  Hz).

(1-fluoro-3-phenylpropyl)zinc(II) iodide (**2b-I**)

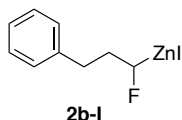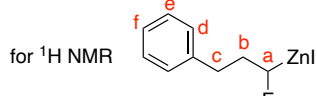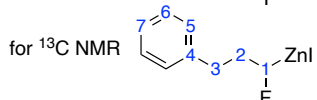

**2b-I** was prepared according to the general procedure for NMR analysis using **1b-I**. The relative ratio of monoalkylzinc and dialkylzinc (66:1) was determined by  $^{19}\text{F}$  NMR using the relative integration values of the peaks at  $-218.40$  ppm (for monoalkylzinc),  $-219.16$  (for dialkylzinc), and  $-219.03$  (for dialkylzinc).

$^1\text{H}$  NMR (400 MHz,  $\text{DMF-}d_7$ )  $\delta$  7.32–7.07 (m, 5H,  $\text{H}_d\text{--H}_f$ ), 4.80 (ddd, 1H,  $^2J_{\text{H-F}} = 46.6$  Hz,  $^3J_{\text{H-H}} = 7.8$  Hz,  $^3J_{\text{H-H}} = 5.6$  Hz,  $\text{H}_a$ ), 2.79–2.62 (m, 2H,  $\text{H}_c$ ), 2.27–2.02 (m, 2H,  $\text{H}_b$ );  $^{13}\text{C}\{^1\text{H}\}$  NMR (100 MHz,  $\text{DMF-}d_7$ )  $\delta$  143.86 (C4), 128.89 (C5 or C6), 128.64 (C5 or C6), 125.81 (C7), 103.67 (d,  $^1J_{\text{C-F}} = 168.6$ , C1), 40.69 (d,  $^2J_{\text{C-F}} = 17.2$  Hz, C2), 34.50 (d,  $^3J_{\text{C-F}} = 8.7$  Hz, C3);  $^{19}\text{F}$  NMR (367 MHz,  $\text{DMF-}d_7$ )  $\delta$   $-218.40$  (major, ddd,  $^2J_{\text{H-F}} = 46.0$  Hz,  $^3J_{\text{H-F}} = 30.8$  Hz,  $^3J_{\text{H-F}} = 25.3$  Hz),  $-219.03$  (minor, ddd,  $^2J_{\text{H-F}} = 32.5$  Hz,  $^3J_{\text{H-F}} = 26.8$  Hz,  $^3J_{\text{H-F}} = 12.8$  Hz),  $-219.16$  (minor, ddd,  $^2J_{\text{H-F}} = 32.5$  Hz,  $^3J_{\text{H-F}} = 26.8$  Hz,  $^3J_{\text{H-F}} = 12.8$  Hz).

(1-fluoro-2-(naphthalen-2-yl)ethyl)zinc(II) iodide (**2c-I**)

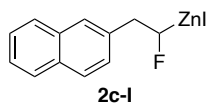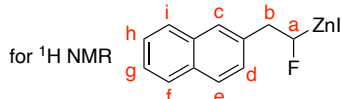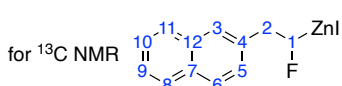

**2c-I** was prepared according to the general procedure for NMR analysis using **1c-I**. The relative ratio of monoalkylzinc and dialkylzinc (47:1) was determined by  $^{19}\text{F}$  NMR using the relative integration values of the peaks at  $-214.83$  ppm (for monoalkylzinc),  $-215.51$  (for dialkylzinc) and,  $-215.31$  ppm (for dialkylzinc).

$^1\text{H}$  NMR (500 MHz,  $\text{DMF-}d_7$ )  $\delta$  7.83 (d, 1H,  $^3J_{\text{H-H}} = 7.5$  Hz,  $\text{H}_d$  or  $\text{H}_e$ ), 7.79 (d, 1H,  $^3J_{\text{H-H}} = 7.5$  Hz,  $\text{H}_d$  or  $\text{H}_e$ ), 7.77 (d, 1H,  $^3J_{\text{H-H}} = 8.5$  Hz,  $\text{H}_i$  or  $\text{H}_f$ ), 7.75 (s, 1H,  $\text{H}_c$ ), 7.46 (dd, 1H,  $^3J_{\text{H-H}} = 8.5$  Hz,  $^4J_{\text{H-H}} = 1.5$  Hz,  $\text{H}_i$  or  $\text{H}_f$ ), 7.42 (ddd, 1H,  $^3J_{\text{H-H}} = 8.5$  Hz,  $^3J_{\text{H-H}} = 8.5$  Hz,  $^4J_{\text{H-H}} = 1.5$  Hz,  $\text{H}_h$  or  $\text{H}_g$ ), 7.38 (ddd, 1H,  $^3J_{\text{H-H}} = 8.5$  Hz,  $^3J_{\text{H-H}} = 8.5$  Hz,  $^4J_{\text{H-H}} = 1.5$  Hz,  $\text{H}_h$  or  $\text{H}_g$ ), 5.07 (ddd, 1H,  $^2J_{\text{H-F}} = 46.0$  Hz,  $^3J_{\text{H-H}} = 7.0$  Hz,  $^3J_{\text{H-H}} = 7.0$  Hz,  $\text{H}_a$ ), 3.31 (dd, 2H,  $^3J_{\text{H-F}} = 29.5$  Hz,  $^3J_{\text{H-H}} = 7.0$  Hz,  $\text{H}_b$ );  $^{13}\text{C}\{^1\text{H}\}$  NMR (125 MHz,  $\text{DMF-}d_7$ )  $\delta$  140.68 (d,  $^3J_{\text{C-F}} = 7.5$  Hz, C4), {134.08, 132.48, 129.03, 127.98, 127.86, 127.67, 127.62, 126.17, 125.39} (for C3, C5–C12), 104.01 (d,  $^1J_{\text{C-F}} = 173.4$  Hz, C1), 44.28 (d,  $^2J_{\text{C-F}} = 17.8$  Hz, C2);  $^{19}\text{F}$  NMR (470 MHz,  $\text{DMF-}d_7$ )  $\delta$   $-214.83$  (major, dt,  $^2J_{\text{H-F}} = 46.0$  Hz,

$^3J_{\text{H-F}} = 29.1$  Hz),  $-215.31$  (minor, ddd,  $^2J_{\text{H-F}} = 46.6$  Hz,  $^3J_{\text{H-F}} = 32.8$  Hz,  $^3J_{\text{H-F}} = 27.8$  Hz),  $-215.51$  (minor, ddd,  $^2J_{\text{H-F}} = 46.5$  Hz,  $^3J_{\text{H-F}} = 32.9$  Hz,  $^3J_{\text{H-F}} = 28.7$  Hz).

(1-fluoroundec-10-en-1-yl)zinc(II) iodide (**2d-I**)

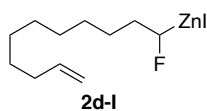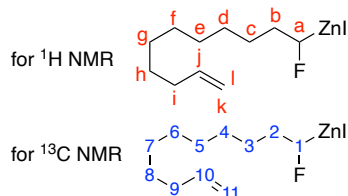

**2d-I** was prepared according to the general procedure for NMR analysis using **1d-I**. The relative ratio of monoalkylzinc and dialkylzinc (90:1) was determined by  $^{19}\text{F}$  NMR using the relative integration values of the peaks at  $-216.31$  ppm (for monoalkylzinc),  $-217.03$  (for dialkylzinc) and,  $-217.03$  ppm (for dialkylzinc).

$^1\text{H}$  NMR (400 MHz,  $\text{DMF-}d_7$ )  $\delta$  5.81–5.70 (m, 1H,  $\text{H}_j$ ), 4.93 (d, 1H,  $^2J_{\text{H-H}} = 4.3$  Hz,  $\text{H}_k$ ), 4.87–4.84 (m, 1H,  $\text{H}_i$ ), 4.76 (ddt, 1H,  $^2J_{\text{H-F}} = 47.0$  Hz,  $^2J_{\text{H-H}} = 1.2$  Hz,  $^3J_{\text{H-H}} = 7$  Hz,  $\text{H}_a$ ), 1.97 (dt, 2H,  $^3J_{\text{H-H}} = 6.8$  Hz,  $^3J_{\text{H-H}} = 5.6$  Hz,  $\text{H}_i$ ), 1.92–1.77 (m, 2H,  $\text{H}_b$ ), 1.38–1.22 (m, 12H,  $\text{H}_c$ – $\text{H}_8$ );  $^{13}\text{C}\{^1\text{H}\}$  NMR (100 MHz,  $\text{DMF-}d_7$ )  $\delta$  139.56 (C10), 114.49 (C11), 104.61 (d,  $^1J_{\text{C-F}} = 167.7$  Hz, C1), 38.38 (C2), 38.21 (C9), {34.05, 30.11, 29.83, 29.47, 29.26} (C4, C5, C6, C7 and C8), 28.36 (d,  $^3J_{\text{C-F}} = 7.7$  Hz, C3);  $^{19}\text{F}$  NMR (367 MHz,  $\text{DMF-}d_7$ )  $\delta$   $-216.31$  (major, dt,  $^2J_{\text{H-F}} = 45.1$  Hz,  $^3J_{\text{F-H}} = 29.0$  Hz),  $-217.03$  (minor, dt,  $^2J_{\text{F-H}} = 45.1$  Hz,  $^3J_{\text{F-H}} = 29.5$  Hz),  $-217.03$  (minor, dt,  $^2J_{\text{F-H}} = 45.1$  Hz,  $^3J_{\text{F-H}} = 29.5$  Hz).

(3-(benzyloxy)-1-fluoropropyl)zinc(II) iodide (**2e-I**)

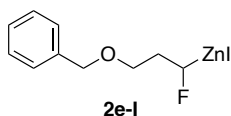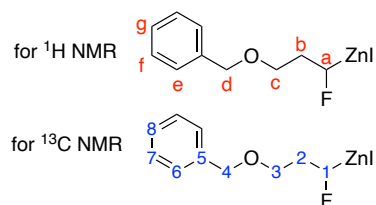

**2e-I** was prepared according to the general procedure for NMR analysis using **1e-I**. The relative ratio of monoalkylzinc and dialkylzinc (22:1) was determined by  $^{19}\text{F}$  NMR using the relative integration values of the peaks at ppm  $-220.52$  (for monoalkylzinc),  $-221.87$  ppm (for dialkylzinc), and  $-222.02$  ppm (for dialkylzinc).

$^1\text{H}$  NMR (400 MHz,  $\text{DMF-}d_7$ )  $\delta$  7.30–7.20 (m, 5H,  $\text{H}_e$ – $\text{H}_g$ ), 4.88 (ddd, 1H,  $^2J_{\text{H-F}} = 46.9$  Hz,  $^3J_{\text{H-H}} = 7.3$  Hz,  $^3J_{\text{H-H}} = 6.0$  Hz,  $\text{H}_a$ ), 4.45 (d, 1H,  $^2J_{\text{H-H}} = 12.0$  Hz,  $\text{H}_d$ ), 4.43 (d, 1H,  $^2J_{\text{H-H}} = 12.0$  Hz,  $\text{H}_d$ ), 3.68–3.50 (m, 2H,  $\text{H}_c$ ), 2.23–2.05 (m, 2H,  $\text{H}_b$ );  $^{13}\text{C}\{^1\text{H}\}$  NMR (100 MHz,  $\text{DMF-}d_7$ )  $\delta$  139.83 (C5), 128.62 (C6 or C7), 127.89 (C6 or C7), 127.64 (C8), 100.89 (d,  $^1J_{\text{C-F}} = 167.0$  Hz, C1), 72.71 (C4), 69.70 (d,  $^3J_{\text{C-F}} = 6.8$  Hz, C3), 38.28 (d,  $^2J_{\text{C-F}} = 17.2$  Hz, C2);  $^{19}\text{F}$  NMR (367 MHz,  $\text{DMF-}d_7$ )  $\delta$   $-220.52$  (major, ddd,  $^2J_{\text{H-F}} = 45.8$  Hz,  $^3J_{\text{F-H}} = 33.1$  Hz,  $^3J_{\text{F-H}} = 28.9$  Hz),  $-221.87$  (minor, ddd,  $^2J_{\text{F-H}} = 44.7$  Hz,  $^3J_{\text{F-H}} = 33.5$  Hz,  $^3J_{\text{F-H}} = 33.5$  Hz),  $-222.02$  (minor, ddd,  $^2J_{\text{F-H}} = 46.1$  Hz,  $^3J_{\text{F-H}} = 34.2$  Hz,  $^3J_{\text{F-H}} = 32.8$  Hz).

(1-fluoro-3-((4-methyl-*N*-phenylphenyl)sulfonamido)propyl)zinc(II) iodide (**2f-I**)



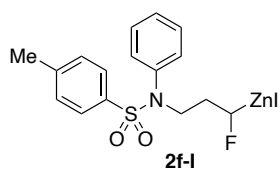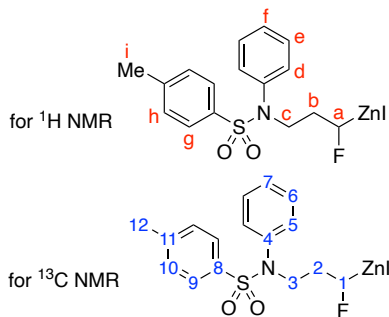

**2f-I** was prepared according to the general procedure for NMR analysis using **1f-I**. The relative ratio of monoalkylzinc and dialkylzinc (26:1) was determined by  $^{19}\text{F}$  NMR using the relative integration values of the peaks at  $-221.0$  ppm (for monoalkylzinc) and  $-221.76$ – $-222.07$  ppm (for dialkylzinc).

$^1\text{H}$  NMR (500 MHz, DMF-*d*<sub>7</sub>)  $\delta$  7.44 (d, 2H,  $^3J_{\text{H-H}} = 8.4$  Hz, H<sub>g</sub>), 7.35 (d, 2H,  $^3J_{\text{H-H}} = 8.4$  Hz, H<sub>h</sub>), 7.32–7.25 (m, 3H, H<sub>e</sub> and H<sub>f</sub>), 7.06–7.05 (m, 2H, H<sub>d</sub>), 4.78 (ddd, 1H,  $^2J_{\text{H-F}} = 46.5$  Hz,  $^3J_{\text{H-H}} = 7.5$  Hz,  $^3J_{\text{H-H}} = 5.0$  Hz, H<sub>a</sub>), 3.80 (ddd, 1H,  $^2J_{\text{H-H}} = 10.5$  Hz,  $^3J_{\text{H-H}} = 7.3$  Hz,  $^3J_{\text{H-H}} = 4.8$  Hz, H<sub>c</sub>), 3.72 (ddd, 1H,  $^2J_{\text{H-H}} = 10.5$  Hz,  $^3J_{\text{H-H}} = 7.5$  Hz,  $^3J_{\text{H-H}} = 5.2$  Hz, H<sub>c</sub>), 2.36 (s, 3H, H<sub>i</sub>), 2.01–1.87 (m, 2H, H<sub>b</sub>);  $^{13}\text{C}\{^1\text{H}\}$  NMR (125 MHz, DMF-*d*<sub>7</sub>)  $\delta$  143.97 (C8), 140.15 (C4), 136.12 (C11), {130.08, 129.34, 129.06, 128.03, 127.99} (for C5, C6, C7, C9, C10), 101.06 (d,  $^1J_{\text{C-F}} = 168.0$  Hz, C1), 49.97 (d,  $^3J_{\text{C-F}} = 6.6$  Hz, C3), 37.26 (d,  $^2J_{\text{C-F}} = 17.4$  Hz, C2);  $^{19}\text{F}$  NMR (470 MHz, DMF-*d*<sub>7</sub>)  $\delta$   $-221.03$  (major, dt,  $^2J_{\text{H-F}} = 46.5$  Hz,  $^3J_{\text{H-F}} = 32.0$  Hz),  $-221.76$ – $-222.07$  (m)

(fluoro(4-(methoxycarbonyl)phenyl)methyl)zinc(II) bromide (**2g-Br**)

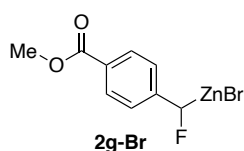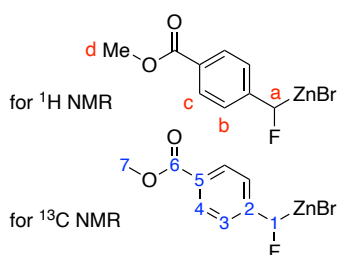

**2g-Br** was prepared according to the general procedure for NMR analysis using **1g-Br**. The relative ratio of monoalkylzinc and dialkylzinc (5.6:1) was determined by  $^1\text{H}$  NMR using the relative integration values of the peaks at 7.07 ppm (for monoalkylzinc) and 6.92 ppm (for dialkylzinc).

$^1\text{H}$  NMR (400 MHz, DMF-*d*<sub>7</sub>) (data for monoalkylzinc)  $\delta$  7.76 (d, 2H,  $^3J_{\text{H-H}} = 8.4$  Hz, H<sub>c</sub>), 7.07 (d, 2H,  $^3J_{\text{H-H}} = 8.4$  Hz, H<sub>b</sub>), 5.97 (d,  $^2J_{\text{H-F}} = 47.2$  Hz, H<sub>a</sub>), 3.78 (s, 3H, H<sub>d</sub>);  $^{13}\text{C}\{^1\text{H}\}$  NMR (100 MHz, DMF-*d*<sub>7</sub>)  $\delta$  167.20 (C6), 157.59 (d,  $^2J_{\text{C-F}} = 10.6$  Hz, C2), 129.51 (C4), 123.72 (C5), 120.15 (d,  $^2J_{\text{C-F}} = 11.5$  Hz, C2), 103.04 (d,  $^1J_{\text{C-F}} = 183.0$  Hz, C1), 51.64 (C7);  $^{19}\text{F}$  NMR (376 MHz, DMF-*d*<sub>7</sub>)  $\delta$   $-224.42$  (major, d,  $^2J_{\text{H-F}} = 45.51$  Hz),  $-224.47$  (minor, d,  $^2J_{\text{H-F}} = 46.61$  Hz),  $-224.60$

(minor, d,  $^2J_{\text{H-F}} = 48.76$  Hz).

## 4. Computational Studies

### 4.1 General Information of the computational studies

The conformational search in this study was conducted by molecular mechanics simulation using Monte-Carlo Multiple Minimum (MCMM) method (MacroModel in Material Science Suite 2019-4, Force Field: OPLS4). Geometry optimization of obtained conformers was performed by density functional theory (DFT) with M06-2X functionals as implemented in Gaussian 16. Computational time was generously provided by the supercomputer system at the information initiative center of Hokkaido University.

### 4.2 Detailed computational methods for conformational searches

Firstly, an optimized structure of Zn/F carbenoid **2a-I•2DMF** was generated by DFT calculation (optimization and frequency calculations) using M06-2x functional with the 6-31G(d) basis set for H, C, N, O, F, Zn elements and LANL2DZ pseudopotential for I. Based on the structure, an input structure of **2a-I•2DMF** for conformational search was built in Material Science Suite. Conformational searches were performed using MCMM method torsional sampling. For conformational searches, OPLS4 force field was used under no solvent condition. Given the insufficiency of generic force fields in accurately estimating the geometry around the zinc atom, constrained conformational searches were conducted on the input structure using substructure capability to freeze 5 core atoms (depicted in blue in Figure S1) while allowing all other atoms to freely adopt energetically accessible conformations. Minimization to convergence was performed using Polak-Ribier Conjugate Gradient (PRCG) method with a threshold of 0.1 after 1000 maximum iterations. Intermediate sampling with retaining mirror-image conformations was performed with a maximum of 200 steps and 100 steps per rotatable bond. To eliminate the generation of similar conformational isomers, torsional sampling was performed with root-mean-square deviation (RMSD) cutoff 2 Å. Considering the inability of the force field to accurately estimate relative conformer energies, a large energy window for saving structures of 42.0 kJ/mol (10.04 kcal/mol) was used. Under the conditions for conformational search, 15 conformational isomers of **2a-I•2DMF** were obtained. The conformational search in same procedure were conducted for **2a'•2DMF** to give 23 conformational isomers of **2a'•2DMF**. For ease, calculation of only one diastereomer **2a'•2DMF** with (*S,R*) absolute configuration was performed.

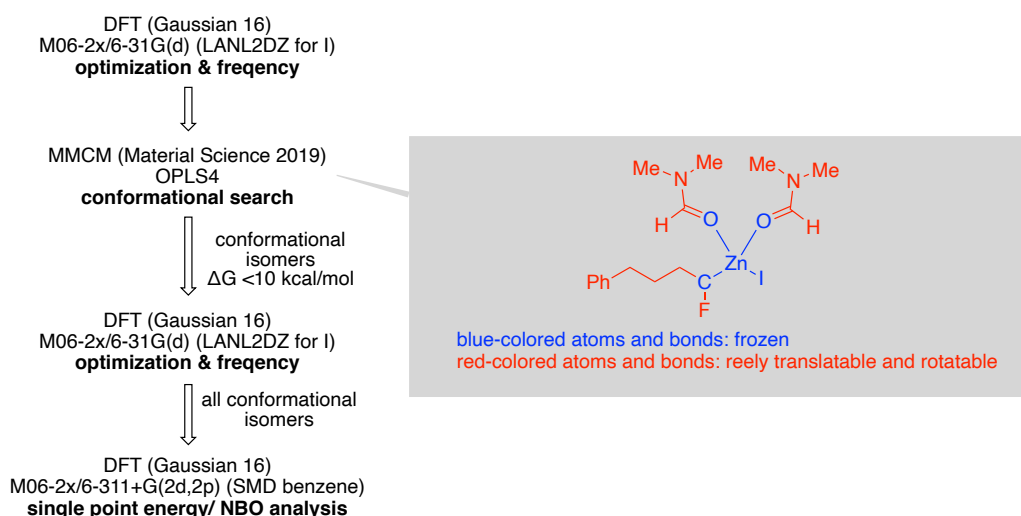

**Figure S1.** Schematic overview of the conformational searches and evaluation of the relative energies.

### 4.2 Detailed computational methods for DFT calculations

Geometry optimization calculation of all obtained conformers was performed at the M06-2x/6-31G(d) basis set for H, C, N, O, F, Zn elements and LANL2DZ pseudopotential for I under the condition of tight SCF convergence criteria (scf = tight) and ultrafine integration (int=grid=ultrafine). After optimization of structures, frequency calculations were performed at the same level of the theory to confirm that the obtained structure were stationary point (no imaginary frequencies). Thermal corrections to the Gibbs energy at 278.15 K (25 °C) were calculated by frequency calculation. The single-point energy calculations were performed at the M06-2x/6-311+G(2d,2p) basis set for H, C, N, O, F, Zn elements and SDD pseudopotential for I with solvation in DMF using solvation model based on density (SMD) model. Detailed relative energies and structures of the obtained stable conformers of **2a-I•2DMF** and **2a'•2DMF** are summarized in Table S1 and S2, respectively.

**Table S1.** Summary of the conformational searches and evaluation of the relative energies of **2a-I•2DMF**.

| conformer No. | $\Delta G$ [kcal/mol] | Order of relative energy | Eel (Hartree) | E (thermal) (kcal/mol) | S (cal/mol/K) | solvation energy (kcal/mol) | bond length (Å) C1-F | bond length (Å) C1-H | bond length (Å) C1-Zn | bond length (Å) Zn••F | bond angle (°) Zn-C1-F | bond angle (°) C2-C1-Zn | bond angle (°) Zn-C1-H1 | bond angle (°) H1-C1-C2 | sum of thee bond angles (°) |
|---------------|-----------------------|--------------------------|---------------|------------------------|---------------|-----------------------------|----------------------|----------------------|-----------------------|-----------------------|------------------------|-------------------------|-------------------------|-------------------------|-----------------------------|
| 1             | 4.25                  | 12                       | -2775.853215  | 276.757                | 194.443       | 9.92                        | 1.43                 | 1.10                 | 2.01                  | 2.87                  | 111.9                  | 120.6                   | 105.0                   | 106.1                   | 331.8                       |
| 2             | 0.00                  | 1                        | -2775.854374  | 276.42                 | 205.133       | 10.41                       | 1.44                 | 1.10                 | 2.02                  | 2.81                  | 107.9                  | 116.4                   | 112.1                   | 108.5                   | 337.0                       |
| 3             | 1.00                  | 4                        | -2775.860552  | 276.41                 | 188.731       | 8.8                         | 1.44                 | 1.10                 | 2.03                  | 2.83                  | 108.2                  | 119.6                   | 109.4                   | 107.9                   | 336.9                       |
| 4             | 2.46                  | 7                        | -2775.855436  | 276.513                | 194.959       | 9.22                        | 1.44                 | 1.10                 | 2.02                  | 2.81                  | 107.5                  | 115.2                   | 113.8                   | 108.9                   | 337.9                       |
| 5             | 3.68                  | 11                       | -2775.854469  | 276.621                | 193.28        | 9.86                        | 1.43                 | 1.10                 | 2.02                  | 2.78                  | 105.8                  | 116.9                   | 113.9                   | 108.1                   | 338.9                       |
| 6             | 2.98                  | 9                        | -2775.849738  | 276.672                | 205.729       | 10.6                        | 1.43                 | 1.10                 | 2.00                  | 2.79                  | 107.1                  | 115.6                   | 112.8                   | 109.1                   | 337.5                       |
| 7             | 4.59                  | 13                       | -2775.850194  | 276.579                | 199.055       | 10.49                       | 1.42                 | 1.10                 | 2.01                  | 2.85                  | 111.3                  | 117.3                   | 107.7                   | 107.4                   | 332.5                       |
| 8             | 0.58                  | 2                        | -2775.85749   | 276.56                 | 197.082       | 9.86                        | 1.42                 | 1.10                 | 2.02                  | 2.90                  | 114.1                  | 110.0                   | 111.1                   | 108.1                   | 329.3                       |
| 9             | 0.80                  | 3                        | -2775.854121  | 276.401                | 202.915       | 10.42                       | 1.43                 | 1.10                 | 2.02                  | 2.81                  | 108.1                  | 116.1                   | 112.5                   | 103.4                   | 332.0                       |
| 10            | 1.74                  | 6                        | -2775.855773  | 276.534                | 196.746       | 10.02                       | 1.42                 | 1.10                 | 2.01                  | 2.83                  | 110.2                  | 118.2                   | 108.8                   | 107.0                   | 334.0                       |
| 11            | 5.27                  | 14                       | -2775.851675  | 276.784                | 194.364       | 9.47                        | 1.44                 | 1.10                 | 2.01                  | 2.78                  | 106.5                  | 115.2                   | 113.4                   | 108.6                   | 337.1                       |
| 12            | 1.57                  | 5                        | -2775.856821  | 276.832                | 196.094       | 10.23                       | 1.43                 | 1.10                 | 2.02                  | 2.87                  | 111.9                  | 120.6                   | 105.1                   | 106.7                   | 332.3                       |
| 13            | 6.58                  | 15                       | -2775.845618  | 276.508                | 201.785       | 9.94                        | 1.44                 | 1.10                 | 2.00                  | 2.82                  | 109.0                  | 118.6                   | 108.5                   | 109.8                   | 336.9                       |
| 14            | 3.51                  | 10                       | -2775.853192  | 276.631                | 196.566       | 9.53                        | 1.43                 | 1.10                 | 2.01                  | 2.85                  | 110.3                  | 120.7                   | 105.8                   | 108.0                   | 334.5                       |
| 15            | 2.53                  | 8                        | -2775.850516  | 276.405                | 204.718       | 10.22                       | 1.44                 | 1.10                 | 2.01                  | 2.81                  | 108.0                  | 116.6                   | 112.3                   | 108.0                   | 336.9                       |
|               |                       |                          |               |                        |               | Stand. Dev.                 | 0.00699              | 0.001438             | 0.007218              | 0.03537               | 2.357831               | 2.783062                | 3.181449                | 1.515778                | 2.883955                    |
|               |                       |                          |               |                        |               | Var.                        | 4.89E-05             | 2.07E-06             | 5.21E-05              | 0.001251              | 5.559368               | 7.745437                | 10.12162                | 2.297584                | 8.317194                    |

**Table S2.** Summary of the conformational searches and evaluation of the relative energies of **2a'**•2DMF.

| conformer No.                                            | $\Delta G$ [kcal/mol] | Order of relative energy | Eel (Hartree) | E (thermal) (kcal/mol) | S (cal/mol/K) | solvation energy (kcal/mol) | bond length (Å) C1-F | bond length (Å) C1-H | bond length (Å) C1-Zn | bond length (Å) Zn••F | bond angle (°) Zn-C1-F | bond angle (°) C2-C1-Zn | bond angle (°) Zn-C1-H1 | bond angle (°) H1-C1-C2 | sum of the bond angles (°) |          |
|----------------------------------------------------------|-----------------------|--------------------------|---------------|------------------------|---------------|-----------------------------|----------------------|----------------------|-----------------------|-----------------------|------------------------|-------------------------|-------------------------|-------------------------|----------------------------|----------|
| 1                                                        | 5.69                  | 10                       | -3252.469306  | 406.141                | 229.949       | 11.36                       | 1.43                 | 1.10                 | 2.04                  | 2.90                  | 112.5                  | 115.1                   | 110.3                   | 107.4                   | 332.7                      |          |
|                                                          |                       |                          |               |                        |               |                             | 1.44                 | 1.10                 | 2.05                  | 2.91                  | 117.7                  | 113.5                   | 112.8                   | 108.5                   | 334.8                      |          |
| 2                                                        | 7.06                  | 15                       | -3252.46408   | 406.195                | 236.548       | 12.00                       | 1.42                 | 1.10                 | 2.03                  | 2.91                  | 114.1                  | 115.8                   | 107.5                   | 108.5                   | 331.9                      |          |
|                                                          |                       |                          |               |                        |               |                             | 1.44                 | 1.10                 | 2.04                  | 2.92                  | 112.9                  | 114.4                   | 110.7                   | 107.9                   | 333.0                      |          |
| 3                                                        | 4.02                  | 2                        | -3252.468938  | 406.245                | 236.671       | 12.22                       | 1.43                 | 1.10                 | 2.04                  | 2.90                  | 111.9                  | 113.2                   | 112.6                   | 108.1                   | 333.9                      |          |
|                                                          |                       |                          |               |                        |               |                             | 1.43                 | 1.10                 | 2.03                  | 2.87                  | 110.5                  | 116.2                   | 111.6                   | 107.0                   | 334.8                      |          |
| 4                                                        | 4.60                  | 4                        | -3252.468391  | 405.996                | 235.046       | 11.85                       | 1.43                 | 1.10                 | 2.03                  | 2.84                  | 108.8                  | 117.5                   | 112.3                   | 107.0                   | 336.9                      |          |
|                                                          |                       |                          |               |                        |               |                             | 1.44                 | 1.10                 | 2.05                  | 2.91                  | 111.8                  | 112.9                   | 113.3                   | 108.4                   | 334.6                      |          |
| 5                                                        | 4.94                  | 8                        | -3252.466471  | 405.873                | 237.531       | 11.63                       | 1.44                 | 1.10                 | 2.04                  | 2.80                  | 105.8                  | 110.8                   | 120.0                   | 108.9                   | 339.7                      |          |
|                                                          |                       |                          |               |                        |               |                             | 1.44                 | 1.10                 | 2.03                  | 2.83                  | 108.1                  | 114.8                   | 114.4                   | 108.1                   | 337.2                      |          |
| 6                                                        | 4.65                  | 6                        | -3252.469989  | 405.822                | 230.923       | 11.07                       | 1.44                 | 1.10                 | 2.05                  | 2.91                  | 111.8                  | 111.1                   | 115.2                   | 107.4                   | 333.8                      |          |
|                                                          |                       |                          |               |                        |               |                             | 1.43                 | 1.10                 | 2.03                  | 2.89                  | 111.9                  | 111.8                   | 113.1                   | 107.9                   | 332.8                      |          |
| 7                                                        | 6.39                  | 11                       | -3252.469485  | 406.278                | 227.704       | 12.35                       | 1.45                 | 1.10                 | 2.05                  | 2.88                  | 109.6                  | 118.7                   | 109.7                   | 107.0                   | 335.4                      |          |
|                                                          |                       |                          |               |                        |               |                             | 1.42                 | 1.10                 | 2.03                  | 2.83                  | 108.5                  | 109.1                   | 118.4                   | 108.5                   | 336.0                      |          |
| 8                                                        | 4.87                  | 7                        | -3252.466005  | 405.927                | 238.945       | 11.86                       | 1.44                 | 1.10                 | 2.04                  | 2.81                  | 106.3                  | 117.7                   | 113.6                   | 107.9                   | 339.2                      |          |
|                                                          |                       |                          |               |                        |               |                             | 1.45                 | 1.10                 | 2.04                  | 2.72                  | 101.3                  | 117.4                   | 118.1                   | 108.7                   | 344.2                      |          |
| 9                                                        | 6.53                  | 12                       | -3252.467521  | 406.172                | 231.007       | 11.13                       | 1.44                 | 1.10                 | 2.04                  | 2.75                  | 103.1                  | 116.5                   | 117.7                   | 108.6                   | 342.7                      |          |
|                                                          |                       |                          |               |                        |               |                             | 1.44                 | 1.10                 | 2.03                  | 2.78                  | 105.3                  | 117.8                   | 114.7                   | 108.5                   | 340.9                      |          |
| 10                                                       | 6.80                  | 13                       | -3252.464248  | 405.924                | 236.15        | 11.52                       | 1.44                 | 1.10                 | 2.03                  | 2.81                  | 107.4                  | 111.9                   | 118.0                   | 108.1                   | 338.1                      |          |
|                                                          |                       |                          |               |                        |               |                             | 1.44                 | 1.10                 | 2.03                  | 2.80                  | 106.6                  | 109.8                   | 120.2                   | 109.1                   | 339.1                      |          |
| 11                                                       | 4.20                  | 3                        | -3252.462533  | 405.972                | 248.652       | 13.25                       | 1.42                 | 1.10                 | 2.03                  | 2.83                  | 108.6                  | 115.1                   | 113.6                   | 107.3                   | 336.0                      |          |
|                                                          |                       |                          |               |                        |               |                             | 1.44                 | 1.10                 | 2.05                  | 2.92                  | 112.7                  | 114.7                   | 111.0                   | 107.9                   | 333.5                      |          |
| 12                                                       | 7.20                  | 17                       | -3252.465085  | 406.164                | 233.866       | 12.19                       | 1.45                 | 1.10                 | 2.05                  | 2.95                  | 113.7                  | 115.7                   | 109.2                   | 106.6                   | 331.5                      |          |
|                                                          |                       |                          |               |                        |               |                             | 1.43                 | 1.10                 | 2.03                  | 2.84                  | 108.7                  | 118.2                   | 111.8                   | 106.9                   | 336.9                      |          |
| 13                                                       | 7.12                  | 16                       | -3252.463611  | 405.967                | 236.544       | 12.04                       | 1.44                 | 1.10                 | 2.04                  | 2.85                  | 109.0                  | 116.9                   | 112.0                   | 107.6                   | 336.5                      |          |
|                                                          |                       |                          |               |                        |               |                             | 1.44                 | 1.10                 | 2.03                  | 2.77                  | 104.2                  | 112.7                   | 119.4                   | 108.5                   | 340.6                      |          |
| 14                                                       | 4.01                  | 1                        | -3252.465822  | 405.712                | 241.494       | 12.83                       | 1.44                 | 1.10                 | 2.04                  | 2.78                  | 105.1                  | 115.7                   | 116.6                   | 107.6                   | 340.0                      |          |
|                                                          |                       |                          |               |                        |               |                             | 1.42                 | 1.10                 | 2.02                  | 2.82                  | 109.3                  | 114.8                   | 113.1                   | 107.5                   | 335.4                      |          |
| 15                                                       | 6.88                  | 14                       | -3252.465134  | 406.166                | 234.823       | 11.82                       | 1.44                 | 1.10                 | 2.04                  | 2.88                  | 110.7                  | 111.2                   | 115.7                   | 107.9                   | 334.8                      |          |
|                                                          |                       |                          |               |                        |               |                             | 1.43                 | 1.10                 | 2.03                  | 2.85                  | 109.5                  | 117.1                   | 112.0                   | 107.0                   | 336.1                      |          |
| 16                                                       | 8.10                  | 18                       | -3252.463425  | 405.999                | 233.777       | 10.87                       | 1.44                 | 1.10                 | 2.03                  | 2.80                  | 105.9                  | 111.5                   | 119.3                   | 108.7                   | 339.5                      |          |
|                                                          |                       |                          |               |                        |               |                             | 1.44                 | 1.10                 | 2.02                  | 2.75                  | 103.9                  | 110.9                   | 120.0                   | 109.0                   | 340.0                      |          |
| 17                                                       | 5.07                  | 9                        | -3252.468074  | 406.219                | 234.88        | 12.23                       | 1.42                 | 1.10                 | 2.03                  | 2.87                  | 111.3                  | 113.3                   | 112.3                   | 107.4                   | 333.0                      |          |
|                                                          |                       |                          |               |                        |               |                             | 1.44                 | 1.10                 | 2.06                  | 2.89                  | 110.3                  | 126.3                   | 103.8                   | 105.5                   | 335.6                      |          |
| 18                                                       | 4.61                  | 5                        | -3252.464938  | 406.076                | 242.547       | 13.25                       | 1.43                 | 1.10                 | 2.04                  | 2.87                  | 110.9                  | 118.6                   | 109.5                   | 106.7                   | 334.8                      |          |
|                                                          |                       |                          |               |                        |               |                             | 1.43                 | 1.10                 | 2.03                  | 2.87                  | 111.1                  | 113.7                   | 113.3                   | 107.7                   | 334.7                      |          |
| 19                                                       | 8.39                  | 19                       | -3252.459847  | 405.986                | 240.282       | 11.50                       | 1.44                 | 1.10                 | 2.03                  | 2.84                  | 108.2                  | 111.7                   | 116.9                   | 109.2                   | 337.7                      |          |
|                                                          |                       |                          |               |                        |               |                             | 1.43                 | 1.10                 | 2.03                  | 2.84                  | 109.1                  | 114.3                   | 113.7                   | 107.9                   | 335.9                      |          |
| 20                                                       | 10.52                 | 23                       | -3252.461693  | 406.384                | 230.591       | 11.20                       | 1.45                 | 1.10                 | 2.04                  | 2.81                  | 106.0                  | 113.8                   | 116.4                   | 107.5                   | 337.7                      |          |
|                                                          |                       |                          |               |                        |               |                             | 1.44                 | 1.10                 | 2.04                  | 2.78                  | 104.8                  | 118.7                   | 113.4                   | 108.8                   | 340.9                      |          |
| 21                                                       | 8.99                  | 20                       | -3252.463221  | 406.295                | 232.215       | 11.95                       | 1.44                 | 1.10                 | 2.05                  | 2.79                  | 104.5                  | 122.7                   | 110.9                   | 106.8                   | 340.4                      |          |
|                                                          |                       |                          |               |                        |               |                             | 1.46                 | 1.10                 | 2.06                  | 2.75                  | 101.6                  | 128.4                   | 108.0                   | 106.3                   | 342.7                      |          |
| 22                                                       | 9.47                  | 22                       | -3252.463166  | 405.978                | 229.637       | 11.12                       | 1.44                 | 1.10                 | 2.03                  | 2.75                  | 103.7                  | 113.0                   | 119.7                   | 108.6                   | 341.3                      |          |
|                                                          |                       |                          |               |                        |               |                             | 1.44                 | 1.98                 | 2.04                  | 2.83                  | 107.9                  | 116.4                   | 113.0                   | 107.5                   | 336.9                      |          |
| 23                                                       | 9.26                  | 21                       | -3252.460208  | 406.274                | 237.582       | 12.45                       | 1.44                 | 1.10                 | 2.04                  | 2.83                  | 107.7                  | 112.4                   | 116.4                   | 108.8                   | 337.7                      |          |
|                                                          |                       |                          |               |                        |               |                             | 1.45                 | 1.10                 | 2.04                  | 2.76                  | 103.1                  | 123.6                   | 110.7                   | 106.8                   | 341.1                      |          |
|                                                          |                       |                          |               |                        |               |                             | Stand. Dev.          | 0.00853              | 0.13016               | 0.00890               | 0.05603                | 3.59215                 | 4.01771                 | 3.73457                 | 0.82878                    | 3.16148  |
|                                                          |                       |                          |               |                        |               |                             | Var.                 | 7.28129E-05          | 0.016942              | 7.92E-05              | 0.003139               | 12.90352                | 16.14196                | 13.94699                | 0.68687                    | 9.994927 |
| $\Delta G = G(2a') - 2G(2a) + 2DMF + G(ZnI2 \cdot 2DMF)$ |                       |                          |               |                        |               |                             |                      |                      |                       |                       |                        |                         |                         |                         |                            |          |

### 4.3 Structures of the most stable conformer of 2a-I•2DMF and 2a'•2DMF

The most stable conformer of 2a-I•2DMF and 2a'•2DMF are depicted in Figure S2 and Figure 3, respectively.

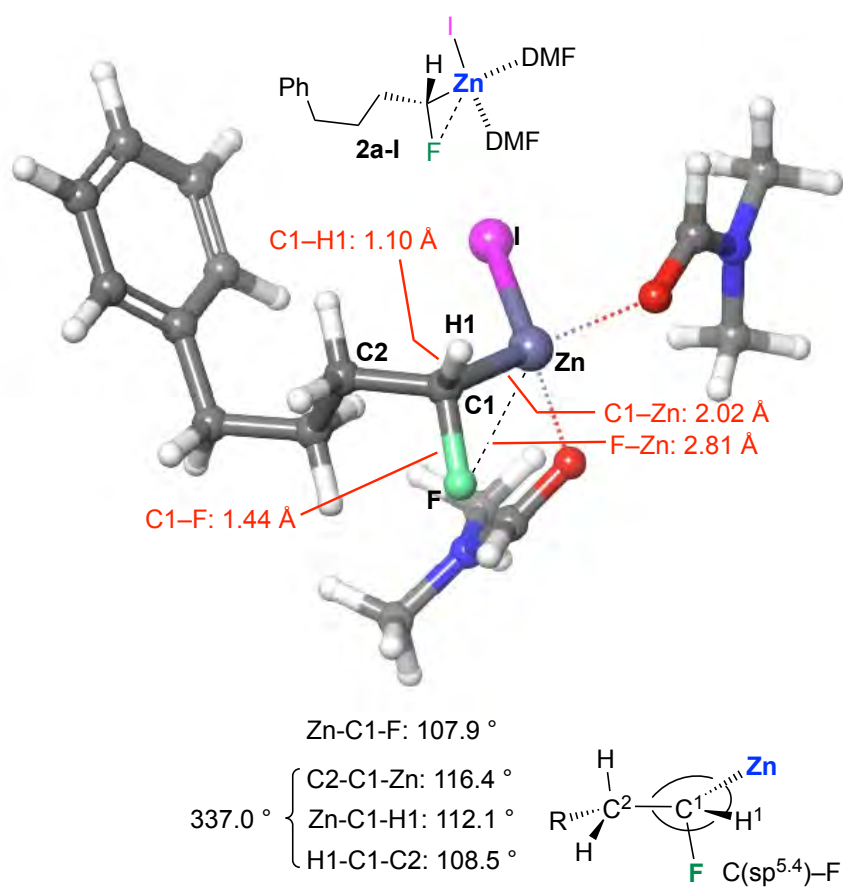

**Figure S2.** The most stable conformer of 2a-I•2DMF and the selected bond length and bond angles.

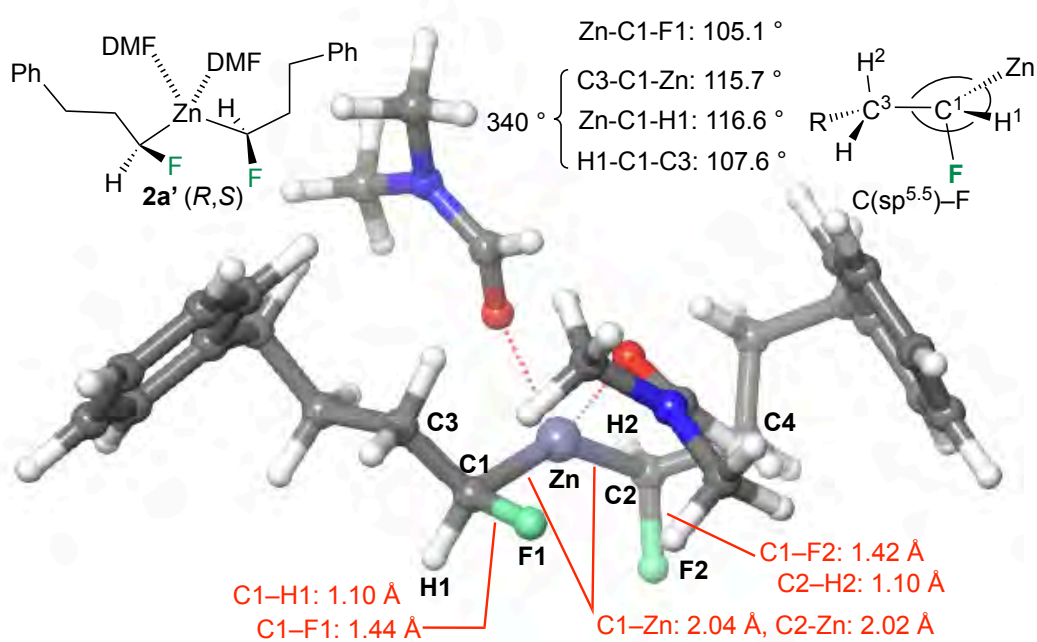

**Figure S3.** The most stable conformer of 2a'•2DMF and the selected bond length and bond angles.

## 5. Kinetic Analysis of Zinc/Fluorine Carbenoids Using NMR spectroscopy

### 5.1 Decay of 2a-I at 0.20 M in DMF (Figure 7, a)

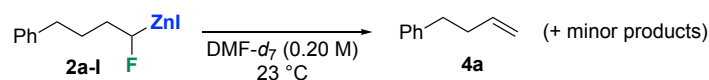

To the vial equipped with a magnetic stir bar were added activated zinc powder (13.1 mg, 0.20 mmol, 2.0 equiv.) and DMF- $d_7$  (dry, 0.30 mL). After the suspension was stirred vigorously at least 15 min, **1a-I** in DMF- $d_7$  (0.50 M, 0.20 mL, 0.10 mmol) was added in dropwise to the suspension. The solution was further stirred for 10 min at room temperature and then stop stirring. The supernatant of the solution was carefully transferred to J-Young-type NMR tube and the NMR tube was sealed tightly. The time of transferring to NMR tube was settled as  $t = 0$ . The NMR tube was taken out from the glove box and rapidly used for NMR experiments. The **2a-I** was analyzed by  $^1\text{H}$  NMR spectroscopy at the specified time. The conversion of **2a-I** was determined by the relative integration values of the peaks at 4.80 ppm (for **2a-I**) and 7.96 ppm (for DMF). The results were summarized in Table S3 and the selected NMR spectra were shown in Figure S4.

**Table S3.** Decay Profiles of 2a-I in DMF- $d_7$  (0.20 M at 23 °C)

| Time [min] | Relative integration value | Time [min] | Relative integration value | Time [min] | Relative integration value |
|------------|----------------------------|------------|----------------------------|------------|----------------------------|
| 31         | 1.000                      | 464        | 0.562                      | 1126       | 0.061                      |
| 46         | 0.993                      | 494        | 0.505                      | 2296       | 0.002                      |
| 74         | 0.980                      | 524        | 0.502                      |            |                            |
| 104        | 0.971                      | 554        | 0.473                      |            |                            |
| 134        | 0.953                      | 584        | 0.426                      |            |                            |
| 164        | 0.929                      | 614        | 0.377                      |            |                            |
| 194        | 0.923                      | 627        | 0.368                      |            |                            |
| 224        | 0.880                      | 629        | 0.361                      |            |                            |
| 254        | 0.839                      | 634        | 0.369                      |            |                            |
| 284        | 0.824                      | 643        | 0.368                      |            |                            |
| 314        | 0.763                      | 733        | 0.242                      |            |                            |
| 344        | 0.746                      | 803        | 0.193                      |            |                            |
| 374        | 0.642                      | 815        | 0.194                      |            |                            |
| 404        | 0.631                      | 896        | 0.146                      |            |                            |
| 434        | 0.567                      | 1012       | 0.077                      |            |                            |

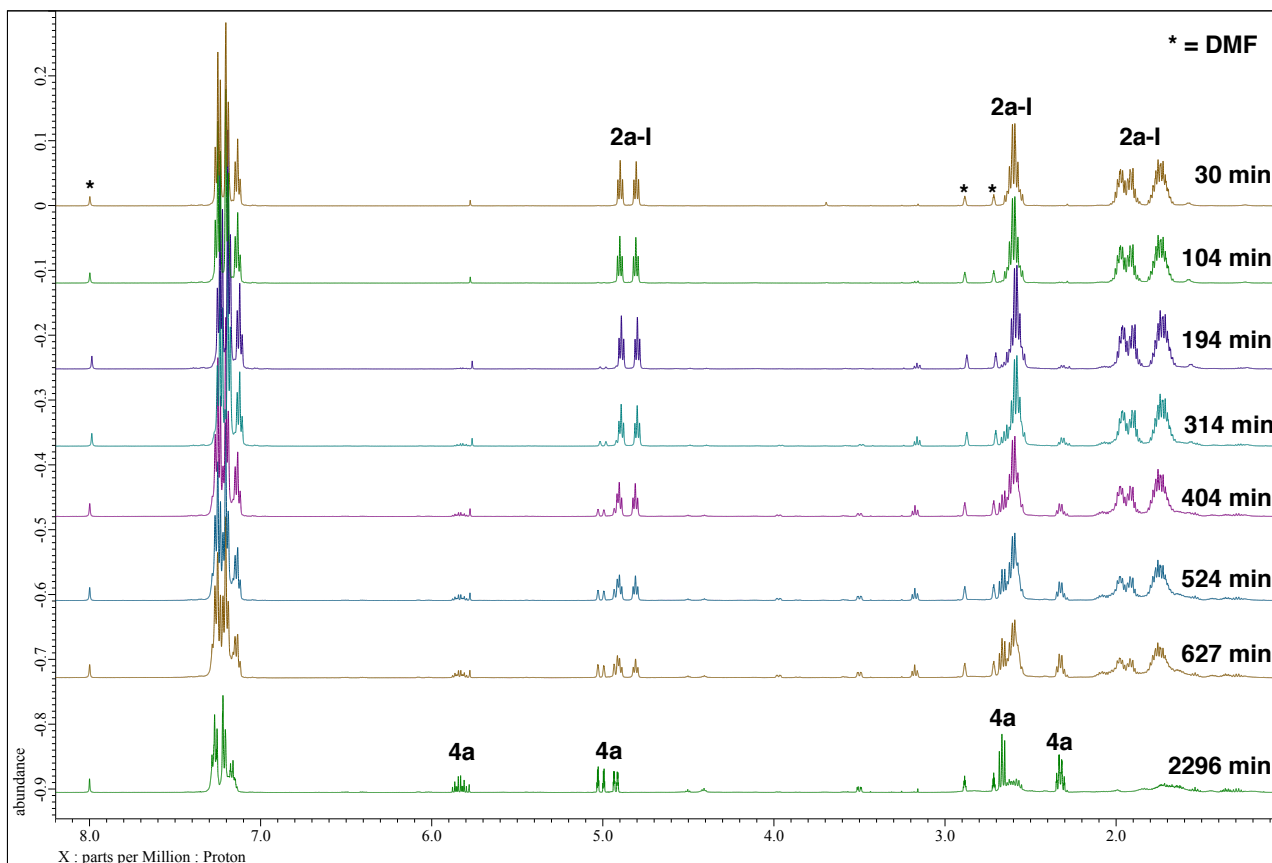

**Figure S4.** Selected NMR spectra of **2a-I** in DMF-*d*<sub>7</sub> (0.20 M at 23 °C) for a typical *in situ* <sup>1</sup>H NMR experiments.

## 5.2 Decay of **2a-I** at 0.10 M in DMF (Figure 7, a)

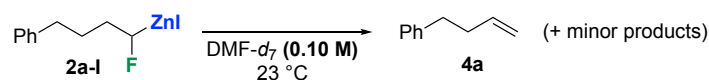

To the vial equipped with a magnetic stir bar were added activated zinc powder (6.6 mg, 0.1 mmol, 2.0 equiv.) and DMF- $d_7$  (dry, 0.45 mL). After the suspension was stirred vigorously at least 15 min, **1a-I** in DMF- $d_7$  (1.00 M, 0.05 mL, 0.05 mmol) was added in dropwise to the suspension. The solution was further stirred for 10 min at room temperature and then stop stirring. The supernatant of the solution was carefully transferred to J-Young-type NMR tube and the NMR tube was sealed tightly. The time of transferring to NMR tube was settled as  $t = 0$ . The NMR tube was taken out from the glove box and rapidly used for NMR experiments. The **2a-I** was analyzed by  $^1\text{H}$  NMR spectroscopy at the specified time. The conversion of **2a-I** was determined by the relative integration values of the peaks at 4.80 ppm (for **2a-I**) and 7.96 ppm (for DMF). The results were summarized in Table S4.

**Table S4.** Decay Profiles of **2a-I** in DMF- $d_7$  (0.10 M at 23 °C)

| Time [min] | Relative integration value | Time [min] | Relative integration value |
|------------|----------------------------|------------|----------------------------|
| 20         | 1.000                      | 823        | 0.603                      |
| 53         | 0.986                      | 905        | 0.555                      |
| 70         | 0.973                      | 968        | 0.555                      |
| 128        | 1.007                      | 1068       | 0.507                      |
| 167        | 1.000                      | 1132       | 0.500                      |
| 236        | 1.000                      | 1224       | 0.425                      |
| 294        | 0.918                      | 1279       | 0.418                      |
| 353        | 0.904                      | 1410       | 0.404                      |
| 411        | 0.822                      | 1558       | 0.336                      |
| 469        | 0.808                      | 1716       | 0.253                      |
| 528        | 0.774                      | 1840       | 0.240                      |
| 586        | 0.726                      | 1952       | 0.226                      |
| 645        | 0.678                      | 2000       | 0.171                      |
| 706        | 0.651                      |            |                            |
| 764        | 0.630                      |            |                            |



### 5.3 Decay of **2a-I** in the presence of $\text{ZnF}_2$ at 0.20 M in DMF (Figure 7, b)

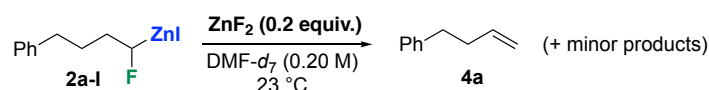

To the vial equipped with a magnetic stir bar were added activated zinc powder (13.1 mg, 0.20 mmol, 2.0 equiv.) and  $\text{DMF-}d_7$  (dry, 0.40 mL). After the suspension was stirred vigorously at least 15 min, **1a-I** in DMF (1.00 M, 0.10 mL, 0.10 mmol) was added in dropwise to the suspension. The solution was further stirred for 10 min at room temperature and then stop stirring. The supernatant of the solution was carefully transferred to J-Young-type NMR tube. To the NMR tube was added  $\text{ZnF}_2$  (2.07 mg, 0.02 mmol, 0.2 equiv.) before the NMR tube was sealed. The time of transferring to NMR tube was settled as  $t = 0$ . The NMR tube was taken out from the glove box and rapidly used for NMR experiments. The **2a-I** was analyzed by  $^1\text{H}$  NMR spectroscopy at the specified time. The conversion of **2a-I** was determined by the relative integration values of the peaks at 4.80 ppm (for **2a-I**) and 7.96 ppm (for DMF). The results were summarized in Table S5.

**Table S5.** Decay Profiles of **2a-I** in  $\text{DMF-}d_7$  (0.20 M at 23 °C) in the presence of  $\text{ZnF}_2$

| Time [min] | Relative integration value | Time [min] | Relative integration value |
|------------|----------------------------|------------|----------------------------|
| 17         | 0.994                      | 449        | 0.544                      |
| 40         | 1.000                      | 524        | 0.454                      |
| 69         | 0.974                      |            |                            |
| 98         | 0.972                      |            |                            |
| 127        | 0.922                      |            |                            |
| 157        | 0.887                      |            |                            |
| 186        | 0.835                      |            |                            |
| 215        | 0.833                      |            |                            |
| 244        | 0.828                      |            |                            |
| 274        | 0.793                      |            |                            |
| 303        | 0.717                      |            |                            |
| 332        | 0.706                      |            |                            |
| 361        | 0.641                      |            |                            |
| 391        | 0.617                      |            |                            |
| 420        | 0.606                      |            |                            |

#### 5.4 Decay of 2a-I in the presence of ZnI<sub>2</sub> at 0.20 M in DMF (Figure 7, b)

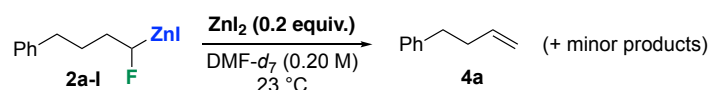

To the vial equipped with a magnetic stir bar were added activated zinc powder (13.1 mg, 0.20 mmol, 2.0 equiv.) and DMF-*d*<sub>7</sub> (dry, 0.40 mL). After the suspension was stirred vigorously at least 15 min, **1a-I** in DMF (1.00 M, 0.10 mL, 0.10 mmol) was added in dropwise to the suspension. The solution was further stirred for 10 min at room temperature and then stop stirring. The supernatant of the solution was carefully transferred to J-Young-type NMR tube. To the NMR tube was added ZnI<sub>2</sub> (6.38 mg, 0.02 mmol, 0.2 equiv.) before the NMR tube was sealed. The time of transferring to NMR tube was settled as *t* = 0. The NMR tube was taken out from the glove box and rapidly used for NMR experiments. The **2a-I** was analyzed by <sup>1</sup>H NMR spectroscopy at the specified time. The conversion of **2a-I** was determined by the relative integration values of the peaks at 4.80 ppm (for **2a-I**) and 7.96 ppm (for DMF). The results were summarized in Table S6.

**Table S6.** Decay Profiles of **2a-I** in DMF-*d*<sub>7</sub> (0.20 M at 23 °C) in the presence of ZnI<sub>2</sub>

| Time [min] | Relative integration value | Time [min] | Relative integration value |
|------------|----------------------------|------------|----------------------------|
| 13         | 1.000                      | 458        | 0.611                      |
| 32         | 1.000                      | 489        | 0.577                      |
| 62         | 1.002                      | 519        | 0.557                      |
| 93         | 0.960                      | 550        | 0.536                      |
| 123        | 0.964                      | 580        | 0.489                      |
| 154        | 0.947                      | 600        | 0.472                      |
| 184        | 0.917                      | 843        | 0.289                      |
| 214        | 0.900                      |            |                            |
| 245        | 0.855                      |            |                            |
| 275        | 0.828                      |            |                            |
| 306        | 0.781                      |            |                            |
| 336        | 0.757                      |            |                            |
| 367        | 0.717                      |            |                            |
| 397        | 0.683                      |            |                            |
| 428        | 0.658                      |            |                            |

### 5.5 Decay of 2c-I at 0.20 M in DMF (Figure 7, c)

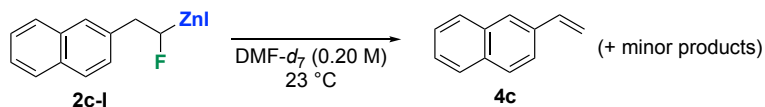

To the vial equipped with a magnetic stir bar were added activated zinc powder (13.1 mg, 0.20 mmol, 2.0 equiv.) and DMF- $d_7$  (dry, 0.30 mL). After the suspension was stirred vigorously at least 15 min, **1c-I** in DMF- $d_7$  (0.50 M, 0.20 mL, 0.10 mmol) was added in dropwise to the suspension. The solution was further stirred for 10 min at room temperature and then stop stirring. The supernatant of the solution was carefully transferred to J-Young-type NMR tube. The time of transferring to NMR tube was settled as  $t = 0$ . The NMR tube was taken out from the glove box and rapidly used for NMR experiments. The **2c-I** was analyzed by  $^1\text{H}$  NMR spectroscopy at the specified time. The conversion of **2c-I** was determined by the relative integration values of the peaks at 5.11 ppm (for **2c-I**) and 5.75 ppm (dimethylamine contained in DMF- $d_7$ ). The results were summarized in Table S7.

**Table S7.** Decay Profiles of **2c-I** in DMF- $d_7$  (0.20 M at 23 °C).

| Time [min] | Relative integration value | Time [min] | Relative integration value | Time [min] | Relative integration value |
|------------|----------------------------|------------|----------------------------|------------|----------------------------|
| 24         | 1.000                      | 524        | 0.743                      | 1759       | 0.175                      |
| 60         | 0.999                      | 555        | 0.737                      | 1821       | 0.155                      |
| 129        | 0.966                      | 585        | 0.733                      | 1884       | 0.148                      |
| 159        | 0.954                      | 680        | 0.640                      | 1946       | 0.134                      |
| 190        | 0.938                      | 910        | 0.518                      | 2009       | 0.124                      |
| 220        | 0.929                      | 1009       | 0.428                      |            |                            |
| 251        | 0.922                      | 1146       | 0.341                      |            |                            |
| 281        | 0.887                      | 1260       | 0.314                      |            |                            |
| 311        | 0.882                      | 1322       | 0.274                      |            |                            |
| 342        | 0.867                      | 1384       | 0.262                      |            |                            |
| 372        | 0.859                      | 1447       | 0.236                      |            |                            |
| 403        | 0.828                      | 1509       | 0.225                      |            |                            |
| 433        | 0.817                      | 1572       | 0.211                      |            |                            |
| 463        | 0.785                      | 1634       | 0.185                      |            |                            |
| 494        | 0.769                      | 1697       | 0.180                      |            |                            |

### 5.6 Decay of 2c-I in the presence of vinylzinc 6c at 0.20 M in DMF (Figure 7, c)

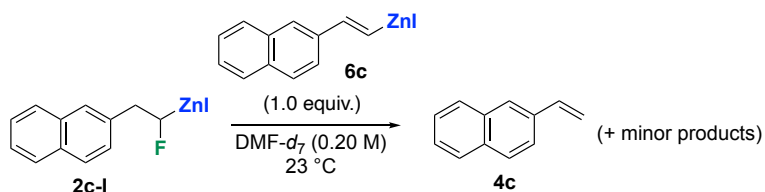

To the vial equipped with a magnetic stir bar were added activated zinc powder (13.1 mg, 0.20 mmol, 2.0 equiv.) and DMF-*d*<sub>7</sub> (dry, 0.05 mL). After the suspension was stirred vigorously at least 15 min, 1c-I in DMF-*d*<sub>7</sub> (0.50 M, 0.20 mL, 0.10 mmol) was added in dropwise to the suspension. The solution was further stirred for 10 min at room temperature and then stop stirring. The supernatant of the solution was carefully transferred to J-Young-type NMR tube. To the NMR tube was added vinylzinc 6c in DMF-*d*<sub>7</sub> (0.40 M, 0.25 ml, 0.10 mmol, 1.0 equiv.) before the NMR tube was sealed. The time of transferring to NMR tube was settled as *t* = 0. The NMR tube was taken out from the glove box and rapidly used for NMR experiments. The 2c-I was analyzed by <sup>1</sup>H NMR spectroscopy at the specified time. The conversion of 2c-I was determined by the relative integration values of the peaks at 5.11 ppm (for 2c-I) and 5.75 ppm (dimethylamine contained in DMF-*d*<sub>7</sub>). The results were summarized in Table S8.

**Table S8.** Decay Profiles of 2c-I in DMF-*d*<sub>7</sub> (0.20 M at 23 °C) in the presence of vinylzinc 6c

| Time [min] | Relative integration value |
|------------|----------------------------|
| 7          | 1.000                      |
| 61         | 0.917                      |
| 120        | 0.867                      |
| 176        | 0.786                      |
| 231        | 0.701                      |
| 287        | 0.606                      |
| 343        | 0.524                      |
| 399        | 0.476                      |
| 455        | 0.378                      |
| 607        | 0.186                      |
| 748        | 0.105                      |
| 879        | 0.038                      |
| 1078       | 0.008                      |

### 5.7 Decay of 2e-I at 0.20 M in DMF (Figure 8, b)

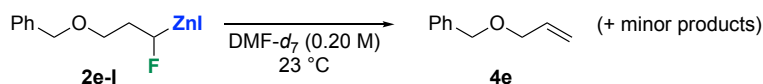

To the vial equipped with a magnetic stir bar were added activated zinc powder (13.1 mg, 0.20 mmol, 2.0 equiv.) and DMF-*d*<sub>7</sub> (dry, 0.40 mL). After the suspension was stirred vigorously at least 15 min, **1e-I** in DMF-*d*<sub>7</sub> (1.00 M, 0.10 mL, 0.10 mmol) was added in dropwise to the suspension. The solution was further stirred for 10 min at room temperature and then stop stirring. The supernatant of the solution was carefully transferred to J-Young-type NMR tube. The time of transferring to NMR tube was settled as *t* = 0. The NMR tube was taken out from the glove box and rapidly used for NMR experiments. The **2e-I** was analyzed by <sup>1</sup>H NMR spectroscopy at the specified time. The conversion of **a-I** was determined by the relative integration values of the peaks at 4.94 (for **2e-I**) and 7.96 ppm (for DMF). The results were summarized in Table S9.

**Table S9.** Decay Profiles of **2e-I** in DMF-*d*<sub>7</sub> (0.20 M at 23 °C)

| Time [min] | Relative integration value | Time [min] | Relative integration value |
|------------|----------------------------|------------|----------------------------|
| 14         | 1.000                      | 814        | 0.317                      |
| 37         | 0.997                      | 870        | 0.273                      |
| 58         | 0.994                      | 927        | 0.239                      |
| 81         | 0.994                      | 980        | 0.202                      |
| 95         | 1.000                      | 1033       | 0.174                      |
| 127        | 0.997                      | 1086       | 0.152                      |
| 159        | 0.975                      | 1139       | 0.134                      |
| 285        | 0.848                      | 1193       | 0.112                      |
| 345        | 0.764                      | 1246       | 0.099                      |
| 413        | 0.674                      | 1300       | 0.078                      |
| 517        | 0.584                      | 1365       | 0.068                      |
| 592        | 0.519                      | 1488       | 0.047                      |
| 645        | 0.484                      | 1688       | 0.024                      |
| 702        | 0.416                      | 2199       | 0.007                      |
| 758        | 0.370                      |            |                            |

### 5.8 Decay of **2f-I** at 0.20 M in DMF (Figure 8, b)

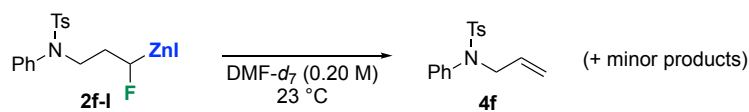

To the vial equipped with a magnetic stir bar were added activated zinc powder (13.1 mg, 0.20 mmol, 2.0 equiv.) and DMF-*d*<sub>7</sub> (dry, 0.40 mL). After the suspension was stirred vigorously at least 15 min, **1f-I** in DMF-*d*<sub>7</sub> (1.00 M, 0.10 mL, 0.10 mmol) was added in dropwise to the suspension. The solution was further stirred for 10 min at room temperature and then stop stirring. The supernatant of the solution was carefully transferred to J-Young-type NMR tube. The time of transferring to NMR tube was settled as *t* = 0. The NMR tube was taken out from the glove box and rapidly used for NMR experiments. The **2f-I** was analyzed by <sup>1</sup>H NMR spectroscopy at the specified time. The conversion of **2f-I** was determined by the relative integration values of the peaks at 4.82 ppm (for **2f-I**) and 7.96 ppm (for DMF). The results were summarized in Table S10.

**Table S10.** Decay Profiles of **2f-I** in DMF-*d*<sub>7</sub> (0.20 M at 23 °C)

| Time [min] | Relative integration value | Time [min] | Relative integration value | Time [min] | Relative integration value |
|------------|----------------------------|------------|----------------------------|------------|----------------------------|
| 10         | 1.000                      | 720        | 0.650                      | 1644       | 0.160                      |
| 41         | 0.997                      | 780        | 0.572                      | 1705       | 0.141                      |
| 72         | 0.997                      | 840        | 0.510                      | 1766       | 0.127                      |
| 102        | 0.993                      | 900        | 0.477                      | 1827       | 0.124                      |
| 124        | 0.987                      | 960        | 0.425                      | 1888       | 0.111                      |
| 155        | 0.980                      | 1020       | 0.386                      | 1949       | 0.101                      |
| 185        | 0.977                      | 1080       | 0.356                      | 2010       | 0.095                      |
| 236        | 0.977                      | 1140       | 0.314                      | 2071       | 0.095                      |
| 297        | 0.974                      | 1217       | 0.288                      | 2123       | 0.088                      |
| 360        | 0.958                      | 1278       | 0.261                      |            |                            |
| 420        | 0.915                      | 1339       | 0.225                      |            |                            |
| 480        | 0.859                      | 1400       | 0.203                      |            |                            |
| 540        | 0.846                      | 1461       | 0.190                      |            |                            |
| 600        | 0.758                      | 1522       | 0.183                      |            |                            |
| 660        | 0.722                      | 1583       | 0.170                      |            |                            |

### 5.9 Decay of **2g-Br** at 0.20 M in DMF (Figure 8, b)

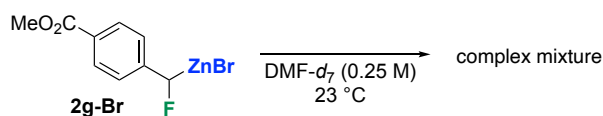

To the vial equipped with a magnetic stir bar were added activated zinc powder (26.2 mg, 0.40 mmol, 2.0 equiv.) and DMF- $d_7$  (dry, 0.80 mL). After the suspension was stirred vigorously at least 15 min, **1g-Br** (49.4 mg, 0.20 mmol) was added in dropwise to the suspension. The solution was further stirred for 10 min at room temperature and then stop stirring. The supernatant of the solution was carefully transferred to J-Young-type NMR tube. To the NMR tube was added 3-chloro-4-fluorotoluene (28.9 mg, 0.20 mmol, 1.0 equiv.) as an internal standard before the NMR tube was sealed. The time of transferring to NMR tube was settled as  $t = 0$ . The NMR tube was taken out from the glove box and rapidly used for NMR experiments. The **2g-Br** was analyzed by  $^1\text{H}$  NMR spectroscopy at the specified time. The conversion of **2g-Br** was determined by the relative integration values of the peaks at around  $-224$  ppm (for **2g-Br** and **2g'**) and  $-116.51$  ppm (for 3-chloro-4-fluorotoluene). The results were summarized in Table S11.

**Table S11.** Decay Profiles of **2g-Br** in DMF- $d_7$  (0.25 M at 23 °C)

| Time [min] | Relative integration value |
|------------|----------------------------|
| 23         | 0.73                       |
| 43         | 0.55                       |
| 65         | 0.5                        |
| 219        | 0.25                       |
| 312        | 0.17                       |
| 441        | 0.099                      |

## 6. Optimization of the Conditions for Acylation of Zinc/Fluorine Carbenoids

General procedure: To a test tube equipped with a magnetic stir bar were added acylating reagent (0.20 mmol, 2.0 equiv.) and freshly prepared **2a-I** in DMF (0.40 mL, 0.25 M, 0.10 mmol). After the solution was stirred at the specified temperature, activating reagent was added to the solution. The reaction mixture was stirred for the specified time, and then poured into a slurry of silica gel in hexane. The slurry was then filtered and washed with hexane/EtOAc. The resulted solution was concentrated under reduced pressure to give crude mixture. The resulted solution was concentrated under reduced pressure to give crude mixture. The NMR yield of **8y** was determined by <sup>1</sup>H NMR spectroscopy using 1,1,2,2-tetrachloroethane as an internal standard. The results were summarized in the Table S12 below.

**Table S12.** Optimizoiin of the conditions for acylation of Zn/F carbenoids **2**

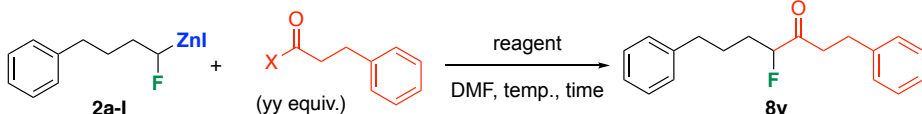

The reaction scheme shows the acylation of Zn/F carbenoid **2a-I** (a benzyl-substituted zinc-fluorine carbenoid) with an acylating reagent (X-CO-CH<sub>2</sub>-CH<sub>2</sub>-Ph) to form product **8y**. The reaction conditions are DMF, temp., and time.

| entry | reagent                                                      | X                     | yy | time [h] | temp. [°C] | NMR yield [%] |
|-------|--------------------------------------------------------------|-----------------------|----|----------|------------|---------------|
| 1     | CuCN·2LiCl (1.0 equiv.)                                      | Cl                    | 2  | 1        | 4          | 40            |
| 2     | CuCN·2LiCl (1.0 equiv.)                                      | Cl                    | 2  | 1        | 23         | 35            |
| 3     | CuCN·2LiCl (1.0 equiv.)                                      | Cl                    | 5  | 1        | 4          | 21            |
| 4     | CuCN·2LiCl (1.0 equiv.) + AlCl <sub>3</sub> (2.0 equiv.)     | Cl                    | 2  | 1        | 4          | 39            |
| 5     | Pd(PPh <sub>3</sub> ) <sub>4</sub> (10 mol%)                 | Cl                    | 2  | 6        | 4          | <5            |
| 6     | PdCl <sub>2</sub> (PPh <sub>3</sub> ) <sub>2</sub> (10 mol%) | Cl                    | 2  | 6        | 4          | <5            |
| 7     | PdCl <sub>2</sub> /SPhos (10 mol%)                           | Cl                    | 2  | 6        | 4          | 9             |
| 8     | CuCN·2LiCl (1.0 equiv.)                                      | SC(S)NBn <sub>2</sub> | 2  | 1        | 4          | 65            |



## 7. Procedures of Copper-Mediated Nucleophilic Monofluoroalkylation and Identification of the Products

### 7.1 Specific procedure and identification of the products

#### (4-fluorohept-6-en-1-yl)benzene (**8b**)

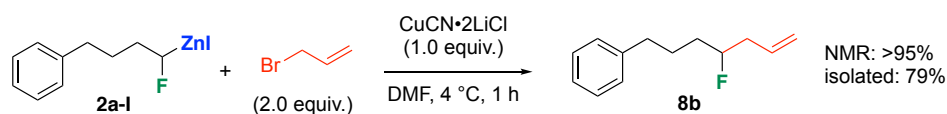

To a test tube equipped with a magnetic stir bar were added freshly prepared **2a-I** in DMF (0.40 mL, 0.25 M, 0.10 mmol). After the solution was cooled to 4 °C, allyl bromide (17.3  $\mu\text{L}$ , 0.20 mmol, 2.0 equiv.) and  $\text{CuCN}\cdot 2\text{LiCl}$  in THF (0.10 mL, 1.0 M, 0.10 mmol) were subsequently added to the solution. The reaction mixture was further stirred for 1 hour at 4 °C and then poured into a slurry of silica gel in hexane. The slurry was then filtered and washed with hexane/EtOAc. The resulted solution was concentrated under reduced pressure to give crude mixture. The NMR yield of **8b** was determined to be >95% yield by  $^1\text{H}$  NMR spectroscopy using 1,1,2,2-tetrachloroethane as an internal standard. The crude mixture was purified by preparative TLC using hexane as eluent to give **8b** as yellow oil (15.1 mg, 79% yield).

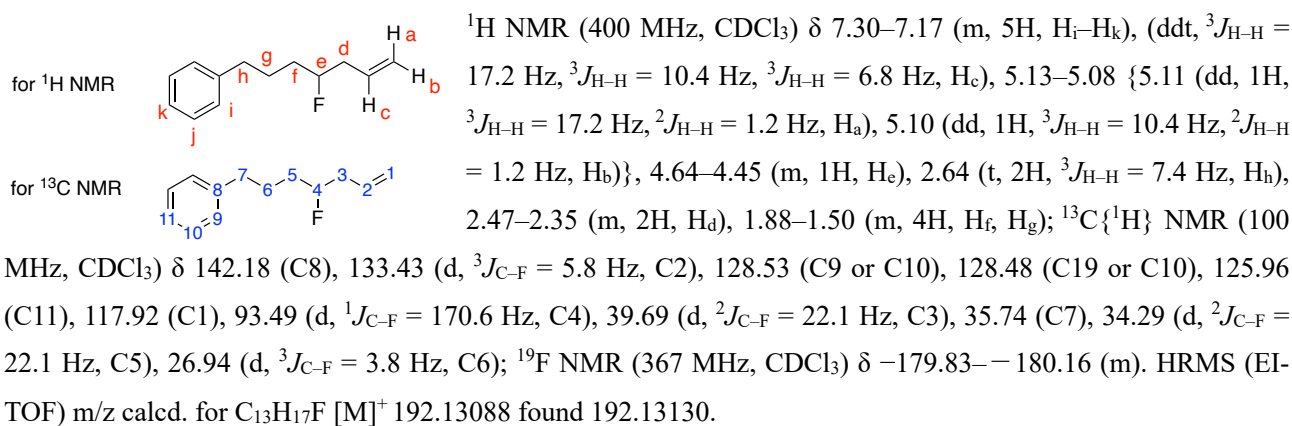

#### (4-fluoro-6-methylhept-6-en-1-yl)benzene (**8d**)

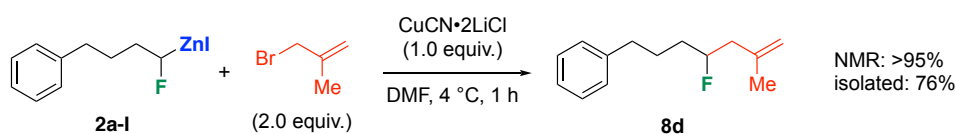

To a test tube equipped with a magnetic stir bar were added freshly prepared **2a-I** in DMF (0.40 mL, 0.25 M, 0.10 mmol). After the solution was cooled to 4 °C, 3-bromo-2-methylprop-1-ene (20.6  $\mu\text{L}$ , 0.20 mmol, 2.0 equiv.) and  $\text{CuCN}\cdot 2\text{LiCl}$  in THF (0.10 mL, 1.0 M, 0.10 mmol) were subsequently added to the solution. The reaction mixture was further stirred for 1 hour at 4 °C and then poured into a slurry of silica gel in hexane. The slurry was then filtered and washed with hexane/EtOAc. The resulted solution was concentrated under reduced pressure to give crude mixture. The NMR yield of **8d** was determined to be >95% yield by  $^1\text{H}$  NMR spectroscopy using 1,1,2,2-tetrachloroethane as an internal standard. The crude mixture was purified by preparative TLC using hexane as eluent to give **8d** as yellow oil (15.7 mg, 76% yield).

for  $^1\text{H}$  NMR 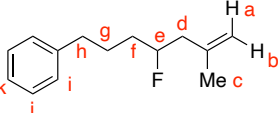  $^1\text{H}$  NMR (400 MHz,  $\text{CDCl}_3$ )  $\delta$  7.31–7.17 (m, 5H,  $\text{H}_i$ – $\text{H}_k$ ), 4.83 (br, 1H,  $\text{H}_a$  or  $\text{H}_b$ ), 4.76 (br d, 1H,  $^2J_{\text{H-H}} = 0.8$  Hz,  $\text{H}_a$  or  $\text{H}_b$ ), 4.74–4.56 (m, 1H,  $\text{H}_c$ ), 2.65 (t,  $^3J_{\text{H-H}} = 7.2$  Hz,  $\text{H}_h$ ), 2.37 (ddd, 1H,  $^2J_{\text{H-H}} = 14.8$  Hz,  $^3J_{\text{H-F}} = 16.6$  Hz,  $^3J_{\text{H-H}} = 7.6$  Hz,  $\text{H}_d$ ), 2.23 (ddd, 1H,  $^2J_{\text{H-H}} = 14.8$  Hz,  $^3J_{\text{H-F}} = 29.8$  Hz,  $^3J_{\text{H-H}} = 4.0$  Hz,  $\text{H}_d$ ), 1.88–1.55 (m, 7H,  $\text{H}_c$ ,  $\text{H}_f$ , and  $\text{H}_g$ );  $^{13}\text{C}\{^1\text{H}\}$  NMR (100 MHz,  $\text{CDCl}_3$ )  $\delta$  142.21 (C9), 141.68 (d,  $^3J_{\text{C-F}} = 3.9$  Hz, C2), 128.54 (C10 or C11), 128.48 (C10 or C11), 125.96 (C12), 113.24 (C1), 92.68 (d,  $^1J_{\text{C-F}} = 170.6$  Hz, C5), 43.61 (d,  $^2J_{\text{C-F}} = 22.1$  Hz, C4), 35.77 (C8), 34.74 (d,  $^2J_{\text{C-F}} = 21.1$  Hz, C6), 27.02 (d,  $^3J_{\text{C-F}} = 3.9$  Hz, C7), 22.90 (C3);  $^{19}\text{F}$  NMR (367 MHz,  $\text{CDCl}_3$ )  $\delta$  –177.69–178.03 (m). HRMS (EI-TOF)  $m/z$  calcd. for.  $\text{C}_{14}\text{H}_{19}\text{F}$  [ $\text{M}$ ] $^+$  206.14653 found 206.14711.

(4-(cyclohex-2-en-1-yl)-4-fluorobutyl)benzene (**8e**)

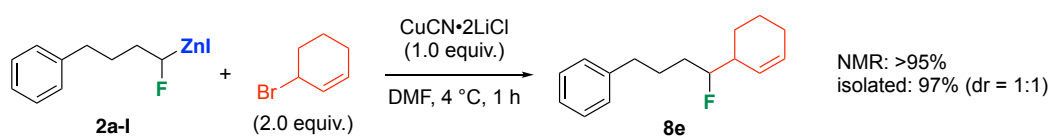

To a test tube equipped with a magnetic stir bar were added freshly prepared **2a-I** in DMF (0.40 mL, 0.25 M, 0.10 mmol). After the solution was cooled to 4 °C, 3-bromocyclohex-1-ene (23.1  $\mu\text{L}$ , 0.20 mmol, 2.0 equiv.) and  $\text{CuCN}\cdot 2\text{LiCl}$  in THF (0.10 mL, 1.0 M, 0.10 mmol) were subsequently added to the solution. The reaction mixture was further stirred for 1 hour at 4 °C and then poured into a slurry of silica gel in hexane. The slurry was then filtered and washed with hexane/EtOAc. The resulted solution was concentrated under reduced pressure to give crude mixture. The NMR yield of **8e** was determined to be >95% yield by  $^1\text{H}$  NMR spectroscopy using 1,1,2,2-tetrachloroethane as an internal standard. The crude mixture was purified by preparative TLC using hexane as eluent to give **8e** as yellow oil (22.5 mg, 97% yield, dr = 1:1).

for  $^1\text{H}$  NMR 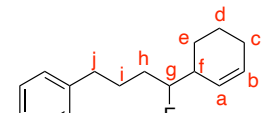  $^1\text{H}$  NMR (400 MHz,  $\text{CDCl}_3$ )  $\delta$  7.30–7.16 (m, 5H,  $\text{H}_k$ – $\text{H}_m$ ), 5.83–5.49 (m, 2H,  $\text{H}_a$  and  $\text{H}_b$ ), 4.43–4.20 (m, 1H,  $\text{H}_g$ ), 2.69–2.60 (m, 2H,  $\text{H}_j$ ), 2.38–2.30 (m, 1H,  $\text{H}_f$ ), 2.00–1.97 (m, 2H,  $\text{H}_c$ ), 1.90–1.12 (m, 8H,  $\text{H}_d$ ,  $\text{H}_e$ ,  $\text{H}_h$ , and  $\text{H}_i$ );  $^{13}\text{C}\{^1\text{H}\}$  NMR (100 MHz,  $\text{CDCl}_3$ )  $\delta$  142.30 and 142.28 (C11), 130.09 and 129.17 (C2), 128.54 (C12 or C13), 128.47 (C12 or C13), 126.84 and 126.54 (d,  $^3J_{\text{C-F}} = 6.7$  Hz, C1), 125.93 (C14), 97.33 and 96.52 (d,  $^1J_{\text{C-F}} = 170.6$  Hz, C7), 40.06 and 40.03 (d,  $^2J_{\text{C-F}} = 18.2$  Hz and  $^2J_{\text{C-F}} = 20.1$  Hz, C6), 35.84 and 35.81 (C10), 32.02 and 31.88 (d,  $^2J_{\text{C-F}} = 22.1$  Hz and  $^2J_{\text{C-F}} = 21.1$  Hz, C8), 27.29 and 27.14 (d,  $^3J_{\text{C-F}} = 2.9$  Hz and  $^2J_{\text{C-F}} = 3.8$  Hz, C9), 25.26 and 25.21 (C3), 25.12 and 23.82 (d,  $^3J_{\text{C-F}} = 4.8$  Hz, C5), 21.66 and 20.90 (C4);  $^{19}\text{F}$  NMR (367 MHz,  $\text{CDCl}_3$ )  $\delta$  –183.35–183.66 and –184.27–184.58 (m). HRMS (EI-TOF)  $m/z$  calcd. for.  $\text{C}_{16}\text{H}_{21}\text{F}$  [ $\text{M}$ ] $^+$  232.16218 found 232.16314.

ethyl 4-(4-(4-fluorobutyl)phenyl)-2-methylene-7-phenylheptanoate (**8f**)

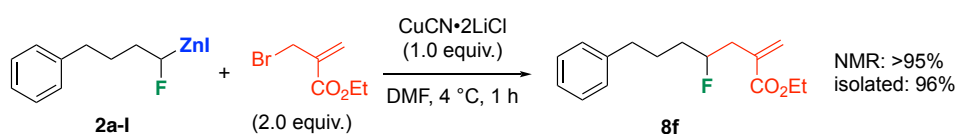

To a test tube equipped with a magnetic stir bar were added freshly prepared **2a-I** in DMF (0.40 mL, 0.25 M, 0.10 mmol). After the solution was cooled to 4 °C, ethyl 2-(bromomethyl)acrylate (27.8  $\mu\text{L}$ , 0.20 mmol, 2.0 equiv.) and

CuCN•2LiCl in THF (0.10 mL, 1.0 M, 0.10 mmol) were subsequently added to the solution. The reaction mixture was further stirred for 1 hour at 4 °C and then poured into a slurry of silica gel in hexane. The slurry was then filtered and washed with hexane/EtOAc. The resulted solution was concentrated under reduced pressure to give crude mixture. The NMR yield of **8f** was determined to be >95% yield by <sup>1</sup>H NMR spectroscopy using 1,1,2,2-tetrachloroethane as an internal standard. The crude mixture was purified by preparative TLC using hexane/EtOAc = 16/1 as eluent to give **8f** as yellow oil (25.4 mg, 96% yield).

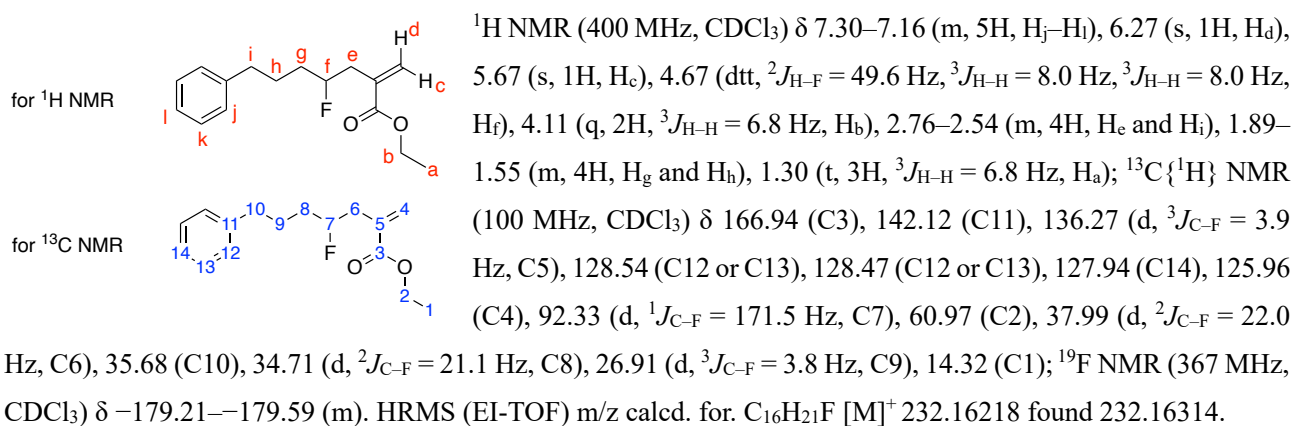

(((4-fluoro-2-methylene-7-phenylheptyl)oxy)methanetriyl)tribenzene (**8g**)

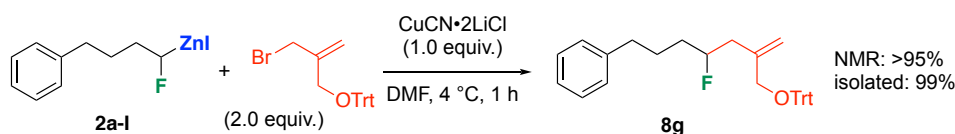

To a test tube equipped with a magnetic stir bar were added *O*-trityl 2-(bromomethyl)prop-2-en-1-ol (78.7 mg, 0.20 mmol, 2.0 equiv.) and DMF (0.20 mL). After the solution was cooled to 4 °C, freshly prepared **2a-I** in DMF (0.40 mL, 0.25 M, 0.10 mmol) and CuCN•2LiCl in THF (0.10 mL, 1.0 M, 0.10 mmol, 1.0 equiv.) were subsequently added to the solution. The reaction mixture was further stirred for 1 hour at 4 °C and then poured into a slurry of silica gel in hexane. The slurry was then filtered and washed with hexane/EtOAc. The resulted solution was concentrated under reduced pressure to give crude mixture. The NMR yield of **8g** was determined to be >95% yield by <sup>1</sup>H NMR spectroscopy using 1,1,2,2-tetrachloroethane as an internal standard. The crude mixture was purified by preparative TLC using hexane as eluent to give **8g** as white amorphous solid (46.6 mg, 99% yield).

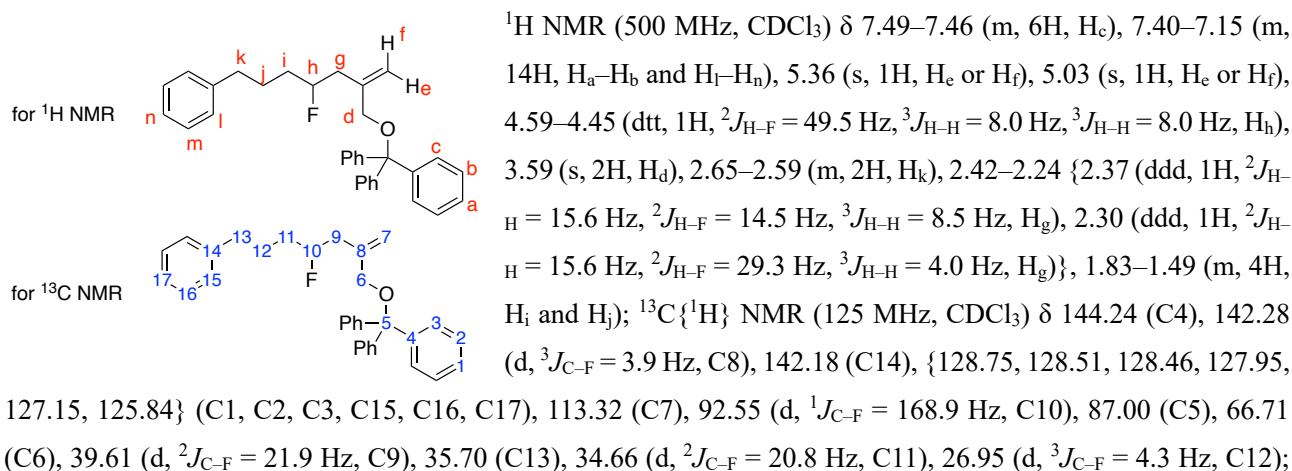

$^{19}\text{F}$  NMR (470 MHz,  $\text{CDCl}_3$ )  $\delta$  -178.68—178.99 (m). HRMS (ESI-TOF)  $m/z$  calcd. for.  $\text{C}_{33}\text{H}_{33}\text{OFNa}$   $[\text{M} + \text{Na}]^+$  487.24077 found 487.24031.

(4-fluorohept-6-ene-1,5-diyl)dibenzene (**8h**) and (*E*)-(4-fluorohept-1-ene-1,7-diyl)dibenzene (**8h'**)

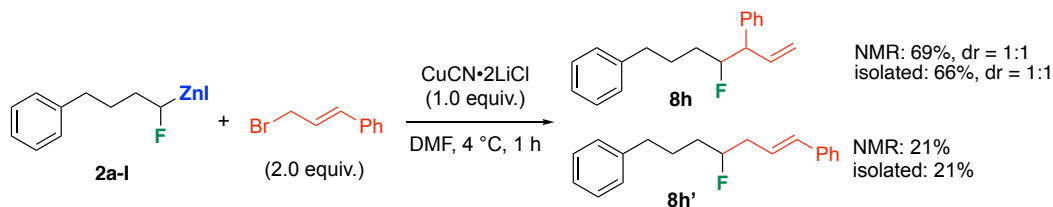

To a test tube equipped with a magnetic stir bar were added freshly prepared **2a-I** in DMF (0.40 mL, 0.25 M, 0.10 mmol). After the solution was cooled to 4 °C, cinnamyl bromide (28.9  $\mu\text{L}$ , 0.20 mmol, 2.0 equiv.) and  $\text{CuCN}\cdot 2\text{LiCl}$  in THF (0.10 mL, 1.0 M, 0.10 mmol) were subsequently added to the solution. The reaction mixture was further stirred for 1 hour at 4 °C and then poured into a slurry of silica gel in hexane. The slurry was then filtered and washed with hexane/EtOAc. The resulted solution was concentrated under reduced pressure to give crude mixture. The NMR yield of **8h** and **8h'** was determined to be 69% and 21% yield respectively by  $^1\text{H}$  NMR spectroscopy using 1,1,2,2-tetrachloroethane as an internal standard. The diastereomeric ratio of **8h** (*syn-8h* and *anti-8h*) was determined to be 1:1 from  $^1\text{H}$  NMR spectroscopy. The crude mixture was purified by column chromatography using hexane as eluent to give mixture of *syn-8h*, *anti-8h*, and **8h'** as colorless oil (23.4 mg, 87% yield). We could not obtain each isomer in pure form even after careful trials.

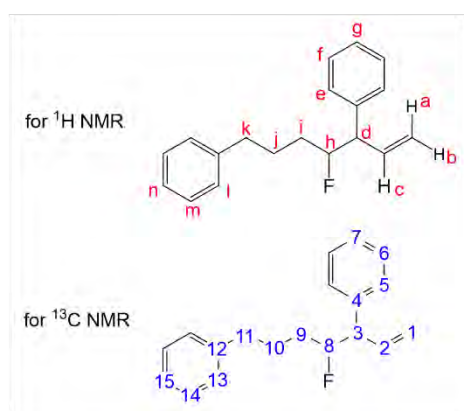

$^1\text{H}$  NMR (400 MHz,  $\text{CDCl}_3$ )  $\delta$  7.39–7.14 (m, 10H,  $\text{H}_e$ ,  $\text{H}_f$ ,  $\text{H}_g$ ,  $\text{H}_i$ ,  $\text{H}_m$  and  $\text{H}_n$ ), 6.27–6.04 (m, 1H,  $\text{H}_c$ ), 5.23–5.11 {5.19 (dd, 1H,  $^2J_{\text{H-H}} = 11.0$  Hz,  $^3J_{\text{H-H}} = 20.4$  Hz,  $\text{H}_a$ ), 5.14 (dd, 1H,  $^2J_{\text{H-H}} = 11.0$  Hz,  $^3J_{\text{H-H}} = 17.2$  Hz,  $\text{H}_b$ )}, 4.87–4.67 (m, 1H,  $\text{H}_h$ ), 3.52–3.41 (m, 1H,  $\text{H}_d$ ), 2.67–2.59 (m, 2H,  $\text{H}_k$ ), 1.93–1.65 (m, 4H,  $\text{H}_i$  and  $\text{H}_j$ );  $^{13}\text{C}\{^1\text{H}\}$  NMR (100 MHz,  $\text{CDCl}_3$ )  $\delta$  142.20 and 142.17 (C12), 140.90 and 140.85 (C4), 137.76 and 137.05 (d,  $^3J_{\text{C-F}} = 5.8$  Hz and  $^3J_{\text{C-F}} = 4.8$  Hz, C2), 128.81–128.35 (C13, C14 and C15), 127.00 and 126.95 (C5), 125.94 and 125.92 (C6), 124.99 and 124.93 (C7), 117.51 and 117.11 (C1), 95.80 and 94.69 (d,  $^1J_{\text{C-F}} = 174.4$  Hz, C8), 55.02 and 54.83 (d,  $^2J_{\text{C-F}} = 15.4$  Hz and  $^2J_{\text{C-F}} = 14.3$  Hz, C3), 35.70 and 35.62 (C11), 32.92 and 32.71 (d,  $^2J_{\text{C-F}} = 17.3$  Hz, C9), 27.15 and 27.05 (d,  $^3J_{\text{C-F}} = 3.8$  Hz, C10);  $^{19}\text{F}$  NMR (367 MHz,  $\text{CDCl}_3$ )  $\delta$  -184.04–-184.48 (m). HRMS (ESI-TOF)  $m/z$  calcd. for.  $\text{C}_{19}\text{H}_{21}\text{FNa}$   $[\text{M} + \text{Na}]^+$  291.15195 found 291.15157.

$^1\text{H}$  NMR (400 MHz,  $\text{CDCl}_3$ )  $\delta$  7.39–7.14 (m, 10H,  $\text{H}_a$ ,  $\text{H}_b$ ,  $\text{H}_c$ ,  $\text{H}_k$ ,  $\text{H}_i$  and  $\text{H}_m$ ), 6.48 (d, 1H,  $^3J_{\text{H-H}} = 16.0$  Hz,  $\text{H}_d$ ), 6.44–6.14 (m, 1H,  $\text{H}_e$ ), 4.73–4.55 (m, 1H,  $\text{H}_g$ ), 2.70–2.42 (m, 4H,  $\text{H}_f$  and  $\text{H}_j$ ), 1.69–1.44 (m, 4H,  $\text{H}_h$  and  $\text{H}_i$ );  $^{13}\text{C}\{^1\text{H}\}$  NMR (100 MHz,  $\text{CDCl}_3$ )  $\delta$  142.17 (C12, overlapped), 139.92 (C4), 137.41 (C6), 133.03 (C5), 128.81–128.35 (C13, C14 and C15), 127.41 (C3), 126.26 (C2), 125.97 (C1), 93.68 (d,  $^1J_{\text{C-F}} = 168.7$  Hz, C8), 38.86 (d,  $^2J_{\text{C-F}} = 22.1$  Hz, C7), 35.72 (C11), 34.34 (d,  $^2J_{\text{C-F}} = 21.1$  Hz, C9), 26.96 (d,  $^3J_{\text{C-F}} = 4.8$  Hz, C10);  $^{19}\text{F}$  NMR (367 MHz,  $\text{CDCl}_3$ )  $\delta$  -177.21—178.88 (m).

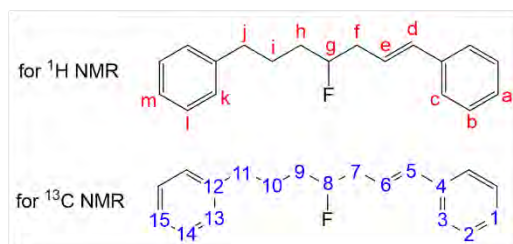

$^1\text{H}$  NMR (400 MHz,  $\text{CDCl}_3$ )  $\delta$  7.39–7.14 (m, 10H,  $\text{H}_a$ ,  $\text{H}_b$ ,  $\text{H}_c$ ,  $\text{H}_k$ ,  $\text{H}_i$  and  $\text{H}_m$ ), 6.48 (d, 1H,  $^3J_{\text{H-H}} = 16.0$  Hz,  $\text{H}_d$ ), 6.44–6.14 (m, 1H,  $\text{H}_e$ ), 4.73–4.55 (m, 1H,  $\text{H}_g$ ), 2.70–2.42 (m, 4H,  $\text{H}_f$  and  $\text{H}_j$ ), 1.69–1.44 (m, 4H,  $\text{H}_h$  and  $\text{H}_i$ );  $^{13}\text{C}\{^1\text{H}\}$  NMR (100 MHz,  $\text{CDCl}_3$ )  $\delta$  142.17 (C12, overlapped), 139.92 (C4), 137.41 (C6), 133.03 (C5), 128.81–128.35 (C13, C14 and C15), 127.41 (C3), 126.26 (C2), 125.97 (C1), 93.68 (d,  $^1J_{\text{C-F}} = 168.7$  Hz, C8), 38.86 (d,  $^2J_{\text{C-F}} = 22.1$  Hz, C7), 35.72 (C11), 34.34 (d,  $^2J_{\text{C-F}} = 21.1$  Hz, C9), 26.96 (d,  $^3J_{\text{C-F}} = 4.8$  Hz, C10);  $^{19}\text{F}$  NMR (367 MHz,  $\text{CDCl}_3$ )  $\delta$  -177.21—178.88 (m).

(((4-fluoro-2-methylene-6-phenylhexyl)oxy)methanetriyl)tribenzene (**8i**)

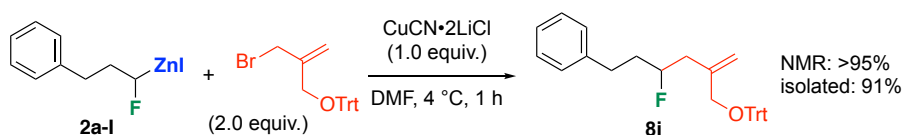

To a test tube equipped with a magnetic stir bar were added *O*-trithyl 2-(bromomethyl)prop-2-en-1-ol (78.7 mg, 0.20 mmol, 2.0 equiv.) and DMF (0.20 mL). After the solution was cooled to 4 °C, freshly prepared **2b-I** in DMF (0.40 mL, 0.25 M, 0.10 mmol) and CuCN·2LiCl in THF (0.10 mL, 1.0 M, 0.10 mmol, 1.0 equiv.) were subsequently added to the solution. The reaction mixture was further stirred for 1 hour at 4 °C and then poured into a slurry of silica gel in hexane. The slurry was then filtered and washed with hexane/EtOAc. The resulted solution was concentrated under reduced pressure to give crude mixture. The NMR yield of **8i** was determined to be >95% yield by <sup>1</sup>H NMR spectroscopy using 1,1,2,2-tetrachloroethane as an internal standard. The crude mixture was purified by preparative TLC using hexane as eluent to give **8i** as yellow oil (40.9 mg, 91% yield).

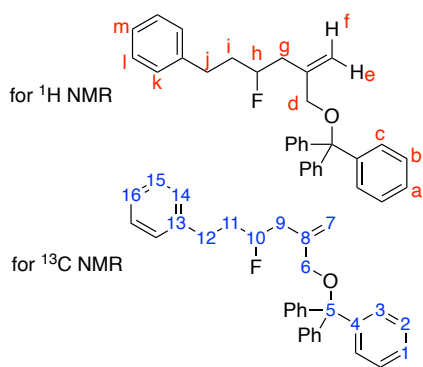

<sup>1</sup>H NMR (400 MHz, CDCl<sub>3</sub>) δ 7.46–7.45 (m, 6H, H<sub>c</sub>), 7.32–7.14 (m, 14H, H<sub>a</sub>–H<sub>b</sub>, H<sub>k</sub>–H<sub>m</sub>), 5.36 (s, 1H, H<sub>e</sub> or H<sub>f</sub>), 5.03 (s, 1H, H<sub>e</sub> or H<sub>f</sub>), 4.61–4.43 (m, 1H, H<sub>h</sub>), 3.56 (s, 2H, H<sub>d</sub>), 2.82–2.59 {2.79 (ddd, 1H, <sup>2</sup>J<sub>H–H</sub> = 13.6 Hz, <sup>3</sup>J<sub>H–F</sub> = 6.8 Hz, <sup>3</sup>J<sub>H–H</sub> = 9.6 Hz, H<sub>g</sub>), 2.63 (ddd, 1H, <sup>2</sup>J<sub>H–H</sub> = 13.6 Hz, <sup>3</sup>J<sub>H–F</sub> = 6.8 Hz, <sup>3</sup>J<sub>H–H</sub> = 9.6 Hz, H<sub>g</sub>), 2.47–2.26 (m, 2H, H<sub>j</sub>), 1.96–1.72 (m, 2H, H<sub>i</sub>); <sup>13</sup>C {<sup>1</sup>H} NMR (100 MHz, CDCl<sub>3</sub>) δ 144.22 (C4), 142.21 (d, <sup>3</sup>J<sub>C–F</sub> = 4.8 Hz, C8), 141.52 (C13), {128.73, 128.56, 128.53, 127.96, 127.14, 126.07} (C1, C2, C3, C14, C15 and C16), 113.40 (C7), 91.85 (d, <sup>1</sup>J<sub>C–F</sub> = 169.7 Hz, C10),

86.98 (C5), 66.67 (C6), 39.61 (d, <sup>2</sup>J<sub>C–F</sub> = 21.1 Hz, C9), 36.85 (d, <sup>2</sup>J<sub>C–F</sub> = 21.1 Hz, C11), 31.45 (d, <sup>3</sup>J<sub>C–F</sub> = 3.9 Hz, C12); <sup>19</sup>F NMR (367 MHz, CDCl<sub>3</sub>) δ –178.44–178.84 (m). HRMS (ESI-TOF) *m/z* calcd. for C<sub>32</sub>H<sub>31</sub>O<sub>2</sub>FNa [M + Na]<sup>+</sup> 473.22512 found 473.22486.

ethyl 4-fluoro-2-methylene-5-(naphthalen-2-yl)pentanoate (**8j**)

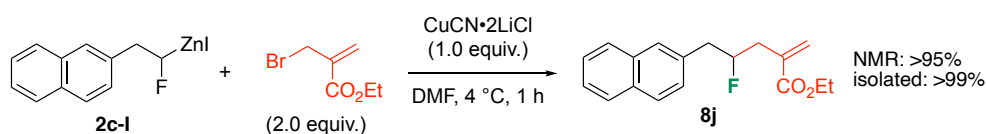

To a test tube equipped with a magnetic stir bar were added freshly prepared **2c-I** in DMF (0.40 mL, 0.25 M, 0.10 mmol). After the solution was cooled to 4 °C, ethyl 2-(bromomethyl)acrylate (27.8 μL, 0.20 mmol, 2.0 equiv.) and CuCN·2LiCl in THF (0.10 mL, 1.0 M, 0.10 mmol) were subsequently added to the solution. The reaction mixture was further stirred for 1 hour at 4 °C and then poured into a slurry of silica gel in hexane. The slurry was then filtered and washed with hexane/EtOAc. The resulted solution was concentrated under reduced pressure to give crude mixture. The NMR yield of **8j** was determined to be >95% yield respectively by <sup>1</sup>H NMR spectroscopy using 1,1,2,2-tetrachloroethane as an internal standard. The crude mixture was purified by preparative TLC using hexane/EtOAc = 20/1 as eluent to give mixture of **8j** as yellow oil (28.6 mg, >99% yield).

for  $^1\text{H}$  NMR

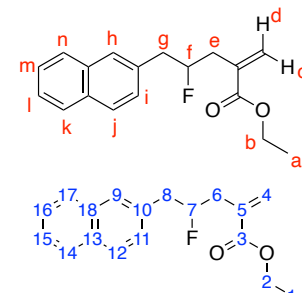

for  $^{13}\text{C}$  NMR

$^1\text{H}$  NMR (400 MHz,  $\text{CDCl}_3$ )  $\delta$  7.84–7.80 (m, 3H,  $\text{H}_n$ ,  $\text{H}_k$  and  $\text{H}_j$ ), 7.70 (s, 1H,  $\text{H}_h$ ), 7.50–7.43 (m, 2H,  $\text{H}_m$  and  $\text{H}_i$ ), 7.39 (d, 1H,  $^3J_{\text{H-H}} = 8.0$  Hz,  $\text{H}_i$ ), 6.31 (s, 1H,  $\text{H}_d$ ), 5.72 (s, 1H,  $\text{H}_c$ ), 5.11–4.93 (m, 1H,  $\text{H}_f$ ), 4.21 (q, 2H,  $^3J_{\text{H-H}} = 7.2$  Hz,  $\text{H}_b$ ), 3.20–3.03 {3.15 (ddd, 1H,  $^3J_{\text{H-F}} = 20.2$  Hz,  $^2J_{\text{H-H}} = 14.1$  Hz,  $^3J_{\text{H-H}} = 6.8$  Hz,  $\text{H}_g$ ), 3.10 (ddd, 1H,  $^3J_{\text{H-F}} = 26.3$  Hz,  $^2J_{\text{H-H}} = 14.1$  Hz,  $^3J_{\text{H-H}} = 4.8$  Hz,  $\text{H}_g$ )}, 2.79–2.58 {2.72 (ddd, 1H,  $^3J_{\text{H-F}} = 31.8$  Hz,  $^2J_{\text{H-H}} = 15.0$  Hz,  $^3J_{\text{H-H}} = 2.8$  Hz,  $\text{H}_e$ ), 2.63 (ddd, 1H,  $^3J_{\text{H-F}} = 15.0$  Hz,  $^2J_{\text{H-H}} = 15.0$  Hz,  $^3J_{\text{H-H}} = 8.4$  Hz,  $\text{H}_e$ )};  $^{13}\text{C}\{^1\text{H}\}$  NMR (100 MHz,  $\text{CDCl}_3$ )  $\delta$  166.86 (C3), 136.07 (d,  $^3J_{\text{C-F}} = 2.9$  Hz, C5), 134.55 (d,  $^3J_{\text{C-F}} = 2.8$  Hz, C10), 133.61 (C13 or C18), 132.44 (C13 or C18), {128.19, 128.16, 128.09, 127.83, 127.75, 127.69, 126.16} (C9, C11, C12, C14, C15, C16, and C17), 125.67 (C4), 92.47 (d,  $^1J_{\text{C-F}} = 172.5$  Hz, C7), 60.98 (C2), 41.72 (d,  $^2J_{\text{C-F}} = 21.0$  Hz, C7), 37.65 (d,  $^2J_{\text{C-F}} = 22.1$  Hz, C7), 14.27 (C1);  $^{19}\text{F}$  NMR (367 MHz,  $\text{CDCl}_3$ )  $\delta$  -177.48–-177.86 (m). HRMS (ESI-TOF)  $m/z$  calcd. for.  $\text{C}_{18}\text{H}_{19}\text{O}_2\text{FNa}$  [ $\text{M} + \text{Na}$ ] $^+$  309.12613 found 309.12541.

#### ethyl 4-fluoro-2-methylenetetradec-13-enoate (**8k**)

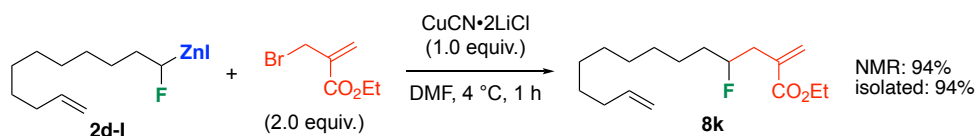

To a test tube equipped with a magnetic stir bar were added freshly prepared **2d-I** in DMF (0.40 mL, 0.25 M, 0.10 mmol). After the solution was cooled to 4 °C, ethyl 2-(bromomethyl)acrylate (27.8  $\mu\text{L}$ , 0.20 mmol, 2.0 equiv.) and  $\text{CuCN}\cdot 2\text{LiCl}$  in THF (0.10 mL, 1.0 M, 0.10 mmol) were subsequently added to the solution. The reaction mixture was further stirred for 1 hour at 4 °C and then poured into a slurry of silica gel in hexane. The slurry was then filtered and washed with hexane/EtOAc. The resulted solution was concentrated under reduced pressure to give crude mixture. The NMR yield of **8k** was determined to be 94% yield respectively by  $^1\text{H}$  NMR spectroscopy using 1,1,2,2-tetrachloroethane as an internal standard. The crude mixture was purified by column chromatography using hexane/EtOAc = 10/1 as eluent to give mixture of **8k** as yellow oil (25.0 mg, 94% yield).

for  $^1\text{H}$  NMR

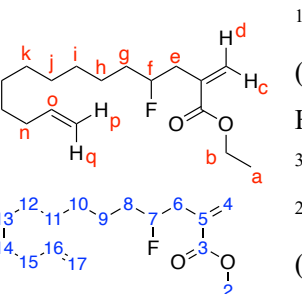

for  $^{13}\text{C}$  NMR

$^1\text{H}$  NMR (400 MHz,  $\text{CDCl}_3$ )  $\delta$  6.27 (s, 1H,  $\text{H}_d$ ), 5.86–5.75 (m, 1H,  $\text{H}_o$ ), 5.69 (s, 1H,  $\text{H}_c$ ), 5.01–4.96 (m, 1H,  $\text{H}_q$ ), 4.94–4.90 (m, 1H,  $\text{H}_p$ ), 4.73–4.55 (m, 1H,  $\text{H}_f$ ), 4.21 (q, 2H,  $^2J_{\text{H-H}} = 7.1$  Hz,  $\text{H}_b$ ), 2.68–2.50 (m, 2H,  $\text{H}_e$ ), 2.03 (dt, 2H,  $^3J_{\text{H-H}} = 7.6$  Hz,  $^3J_{\text{H-H}} = 6.8$  Hz,  $\text{H}_n$ ), 1.70–1.28 (m, 14H,  $\text{H}_g$ – $\text{H}_m$ ), 1.30 (t, 3H,  $^2J_{\text{H-H}} = 7.2$  Hz,  $\text{H}_a$ );  $^{13}\text{C}\{^1\text{H}\}$  NMR (100 MHz,  $\text{CDCl}_3$ )  $\delta$  166.98 (C3), 139.34 (C16), 136.33 (d,  $^3J_{\text{C-F}} = 2.8$  Hz, C5), 127.86 (C4), 114.26 (C17), 92.54 (d,  $^1J_{\text{C-F}} = 159.9$  Hz, C7), 60.95 (C2), 37.99 (d,  $^2J_{\text{C-F}} = 22.1$  Hz, C6), 35.23 (d,  $^2J_{\text{C-F}} = 21.0$  Hz, C8), 33.93 (C15), {29.57, 29.52, 29.50, 29.23, 29.04, one carbon overlapped} (C10, C11, C12, C13 and C14), 25.13 (d,  $^3J_{\text{C-F}} = 4.7$  Hz, C9), 14.32 (C1);  $^{19}\text{F}$  NMR (367 MHz,  $\text{CDCl}_3$ )  $\delta$  -178.84–-179.22 (m). HRMS (ESI-TOF)  $m/z$  calcd. for.  $\text{C}_{17}\text{H}_{29}\text{O}_2\text{FNa}$  [ $\text{M} + \text{Na}$ ] $^+$  307.20438 found 307.20390.

#### ethyl 6-(benzyloxy)-4-fluoro-2-methylenehexanoate (**8l**)



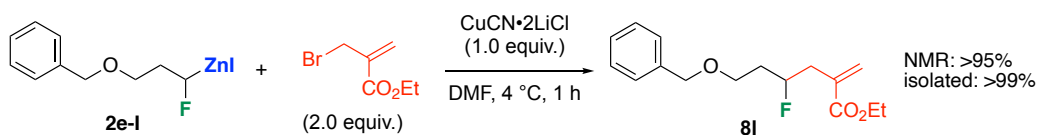

To a test tube equipped with a magnetic stir bar were added freshly prepared **2e-I** in DMF (0.40 mL, 0.25 M, 0.10 mmol). After the solution was cooled to 4 °C, ethyl 2-(bromomethyl)acrylate (27.8  $\mu$ L, 0.20 mmol, 2.0 equiv.) and CuCN·2LiCl in THF (0.10 mL, 1.0 M, 0.10 mmol) were subsequently added to the solution. The reaction mixture was further stirred for 1 hour at 4 °C and then poured into a slurry of silica gel in hexane. The slurry was then filtered and washed with hexane/EtOAc. The resulted solution was concentrated under reduced pressure to give crude mixture. The NMR yield of **8i** was determined to be >95% yield respectively by  $^1\text{H}$  NMR spectroscopy using 1,1,2,2-tetrachloroethane as an internal standard. The crude mixture was purified by preparative TLC using hexane/EtOAc = 99/1 as eluent to give mixture of **8i** as colorless oil (28.1 mg, >99% yield).

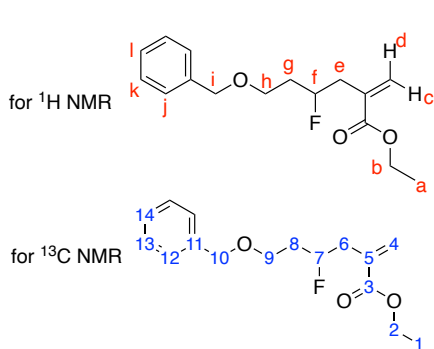

$^1\text{H}$  NMR (400 MHz,  $\text{CDCl}_3$ )  $\delta$  7.30–7.19 (m, 5H,  $\text{H}_j\text{--H}_i$ ), 6.22 (s, 1H,  $\text{H}_d$ ), 5.63 (s, 1H,  $\text{H}_c$ ), 4.87–7.72 (m, 1H,  $\text{H}_f$ ), 4.45 (s, 2H,  $\text{H}_i$ ), 4.14 (q, 2H,  $^3J_{\text{H--H}} = 7.2$  Hz,  $\text{H}_b$ ), 3.59–3.51 (m, 2H,  $\text{H}_h$ ), 2.66–2.54 (m, 2H,  $\text{H}_e$ ), 1.90–1.82 (m, 2H,  $\text{H}_g$ ), 1.23 (t, 3H,  $^3J_{\text{H--H}} = 7.2$  Hz,  $\text{H}_a$ );  $^{13}\text{C}$  { $^1\text{H}$ } NMR (100 MHz,  $\text{CDCl}_3$ )  $\delta$  166.90 (C3), 138.42 (C11), 136.14 (d,  $^3J_{\text{C--F}} = 3.8$  Hz, C5), 128.51 (C12 or C13), 128.00 (C14), 127.75 (C12 or C13), 89.85 (d,  $^1J_{\text{C--F}} = 170.5$  Hz, C7), 73.23 (C10), 66.19 (d,  $^3J_{\text{C--F}} = 4.8$  Hz, C9), 60.97 (C2), 37.89 (d,  $^2J_{\text{C--F}} = 21.1$  Hz, C6), 35.46 (d,  $^2J_{\text{C--F}} = 21.1$  Hz, C8), 14.29 (C1);

$^{19}\text{F}$  NMR (367 MHz,  $\text{CDCl}_3$ )  $\delta$  –181.09–181.48 (m). HRMS (ESI-TOF)  $m/z$  calcd. for.  $\text{C}_{16}\text{H}_{21}\text{O}_3\text{FNa}$  [ $\text{M} + \text{Na}$ ] $^+$  303.13669 found 303.13618.

ethyl 4-fluoro-6-((4-methyl-*N*-phenylphenyl)sulfonamido)-2-methylenehexanoate (**8m**)

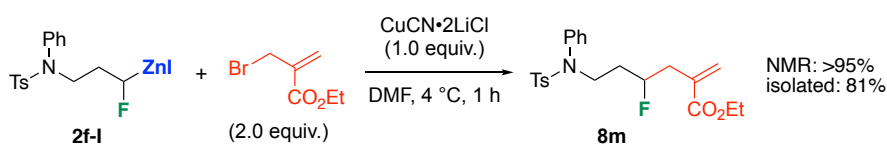

To a test tube equipped with a magnetic stir bar were added freshly prepared **2f-I** in DMF (0.40 mL, 0.25 M, 0.10 mmol). After the solution was cooled to 4 °C, ethyl 2-(bromomethyl)acrylate (27.8  $\mu$ L, 0.20 mmol, 2.0 equiv.) and CuCN·2LiCl in THF (0.10 mL, 1.0 M, 0.10 mmol) were subsequently added to the solution. The reaction mixture was further stirred for 1 hour at 4 °C and then poured into a slurry of silica gel in hexane. The slurry was then filtered and washed with hexane/EtOAc. The resulted solution was concentrated under reduced pressure to give crude mixture. The NMR yield of **8m** was determined to be >95% yield respectively by  $^1\text{H}$  NMR spectroscopy using 1,1,2,2-tetrachloroethane as an internal standard. The crude mixture was purified by preparative TLC using hexane/EtOAc = 10/1 as eluent to give mixture of **8m** as pink oil (33.8 mg, 81% yield).

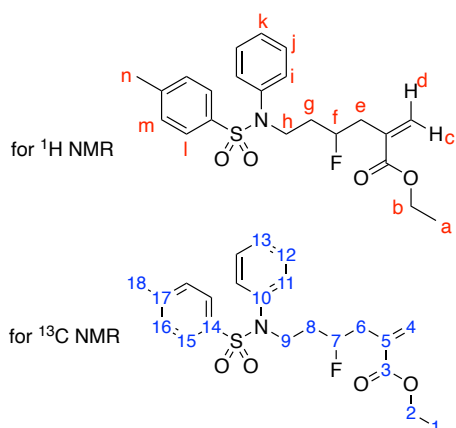

$^1\text{H}$  NMR (400 MHz,  $\text{CDCl}_3$ )  $\delta$  7.46 (d, 2H,  $^3J_{\text{H-H}} = 8.0$  Hz,  $\text{H}_i$ ), 7.32–7.28 (m, 3H,  $\text{H}_j$  and  $\text{H}_k$ ), 7.23 (d, 2H,  $^3J_{\text{H-H}} = 8.0$  Hz,  $\text{H}_i$ ), 7.06–7.01 (m, 2H,  $\text{H}_i$ ), 6.24 (s, 1H,  $\text{H}_d$ ), 5.64 (s, 1H,  $\text{H}_c$ ), 4.82–4.66 (m, 1H,  $\text{H}_f$ ), 4.19 (q, 2H,  $^3J_{\text{H-H}} = 7.2$  Hz,  $\text{H}_i$ ), 3.76–3.59 (m, 2H,  $\text{H}_e$ ), 2.59–2.51 (m 2H,  $\text{H}_h$ ), 2.25 (s, 3H,  $\text{H}_n$ ), 1.82–1.70 (m, 4H,  $\text{H}_g$ ), 1.29 (t, 3H,  $^3J_{\text{H-H}} = 7.2$  Hz,  $\text{H}_i$ );  $^{13}\text{C}\{^1\text{H}\}$  NMR (100 MHz,  $\text{CDCl}_3$ )  $\delta$  166.73 (C3), 143.60 (C10), 139.25 (C14), 135.72 (d,  $^3J_{\text{C-F}} = 3.8$  Hz, C5), 135.10 (C17), {129.54, 129.21, 128.83, 128.24, 128.13, 127.87} (C4, C11, C12, C13, C15, C16), 89.69 (d,  $^1J_{\text{C-F}} = 172.5$  Hz, C7), 61.01 (C2), 47.08 (d,  $^3J_{\text{C-F}} = 3.8$  Hz, C9), 37.70 (d,  $^2J_{\text{C-F}} = 21.1$  Hz, C6), 34.23 (d,  $^2J_{\text{C-F}} = 22.2$  Hz, C6), 21.65 (C18),

14.29 (C1);  $^{19}\text{F}$  NMR (367 MHz,  $\text{CDCl}_3$ )  $\delta$  -181.19–-181.57 (m). HRMS (ESI-TOF)  $m/z$  calcd. for  $\text{C}_{22}\text{H}_{26}\text{O}_4\text{FNaS}$  [ $\text{M} + \text{Na}$ ] $^+$  442.14588 found 442.14536.

#### methyl 4-(1-fluorobut-3-en-1-yl)benzoate (**8n**)

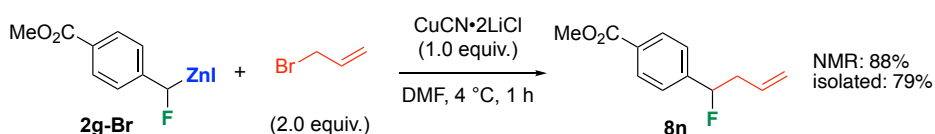

To a test tube equipped with a magnetic stir bar were added freshly prepared **2g-Br** in DMF (0.40 mL, 0.25 M, 0.10 mmol). After the solution was cooled to 4 °C, allyl bromide (17.3  $\mu\text{L}$ , 0.20 mmol, 2.0 equiv.) and  $\text{CuCN}\cdot 2\text{LiCl}$  in THF (0.10 mL, 1.0 M, 0.10 mmol) were subsequently added to the solution. The reaction mixture was further stirred for 1 hour at 4 °C and then poured into a slurry of silica gel in hexane. The slurry was then filtered and washed with hexane/EtOAc. The resulted solution was concentrated under reduced pressure to give crude mixture. The NMR yield of **8n** was determined to be 88% yield respectively by  $^1\text{H}$  NMR spectroscopy using 1,1,2,2-tetrachloroethane as an internal standard. The crude mixture was purified by preparative TLC using hexane/EtOAc = 20/1 as eluent to give mixture of **8n** as colorless oil (16.4 mg, 79% yield).

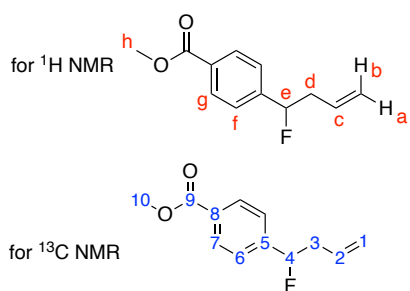

$^1\text{H}$  NMR (400 MHz,  $\text{CDCl}_3$ )  $\delta$  8.04 (d, 2H,  $^3J_{\text{H-H}} = 8.0$  Hz,  $\text{H}_g$ ), 7.39 (d, 2H,  $^3J_{\text{H-H}} = 8.0$  Hz,  $\text{H}_f$ ), 5.82–5.72 (m, 2H,  $\text{H}_d$ ), 5.54 (ddd, 1H,  $^2J_{\text{H-F}} = 48.8$  Hz,  $^3J_{\text{H-H}} = 8.0$  Hz,  $^3J_{\text{H-H}} = 5.2$  Hz,  $\text{H}_e$ ), 5.13 (d, 1H,  $^3J_{\text{H-H}} = 17.2$  Hz,  $\text{H}_b$ ), 5.12 (d, 1H,  $^3J_{\text{H-H}} = 10.8$  Hz,  $\text{H}_a$ ), 3.92 (s, 3H,  $\text{H}_h$ ), 2.74–2.58 (m, 2H,  $\text{H}_d$ );  $^{13}\text{C}\{^1\text{H}\}$  NMR (100 MHz,  $\text{CDCl}_3$ )  $\delta$  166.85 (C9), 144.87 (d,  $^2J_{\text{C-F}} = 20.1$  Hz, C5), 132.27 (d,  $^3J_{\text{C-F}} = 5.7$  Hz, C2), 130.16 (C8), 129.88 (C7), 125.125.49 (d,  $^3J_{\text{C-F}} = 7.7$  Hz, C6), 118.89 (C1), 93.17 (d,  $^1J_{\text{C-F}} = 174.4$  Hz, C4), 52.30 (C10),

41.63 (d,  $^2J_{\text{C-F}} = 24.0$  Hz, C3);  $^{19}\text{F}$  NMR (367 MHz,  $\text{CDCl}_3$ )  $\delta$  -176.49 (ddd,  $^2J_{\text{H-F}} = 46.6$  Hz,  $^3J_{\text{H-F}} = 26.1$  Hz,  $^3J_{\text{H-F}} = 18.4$  Hz). HRMS (EI-TOF)  $m/z$  calcd. for  $\text{C}_{12}\text{H}_{13}\text{O}_2\text{F}$  [ $\text{M}$ ] $^+$  208.08941 found 208.08905.

#### *N*-(3-fluorohexa-4,5-dien-1-yl)-4-methyl-*N*-phenylbenzenesulfonamide (**8o**)

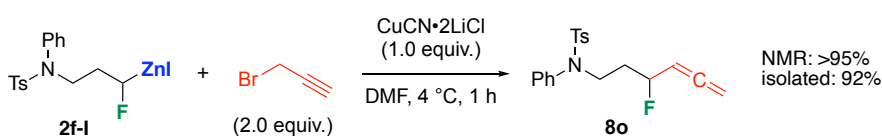



To a test tube equipped with a magnetic stir bar were added freshly prepared **2f-I** in DMF (0.40 mL, 0.25 M, 0.10 mmol). After the solution was cooled to 4 °C, propargyl bromide (15.1 μL, 0.20 mmol, 2.0 equiv.) and CuCN•2LiCl in THF (0.10 mL, 1.0 M, 0.10 mmol) were subsequently added to the solution. The reaction mixture was further stirred for 1 hour at 4 °C and then poured into a slurry of silica gel in hexane. The slurry was then filtered and washed with hexane/EtOAc. The resulted solution was concentrated under reduced pressure to give crude mixture. The NMR yield of **8o** was determined to be >95% yield respectively by <sup>1</sup>H NMR spectroscopy using 1,1,2,2-tetrachloroethane as an internal standard. The crude mixture was purified by column chromatography using hexane as eluent to give mixture of **8o** as yellow oil (31.6 mg, 92% yield).

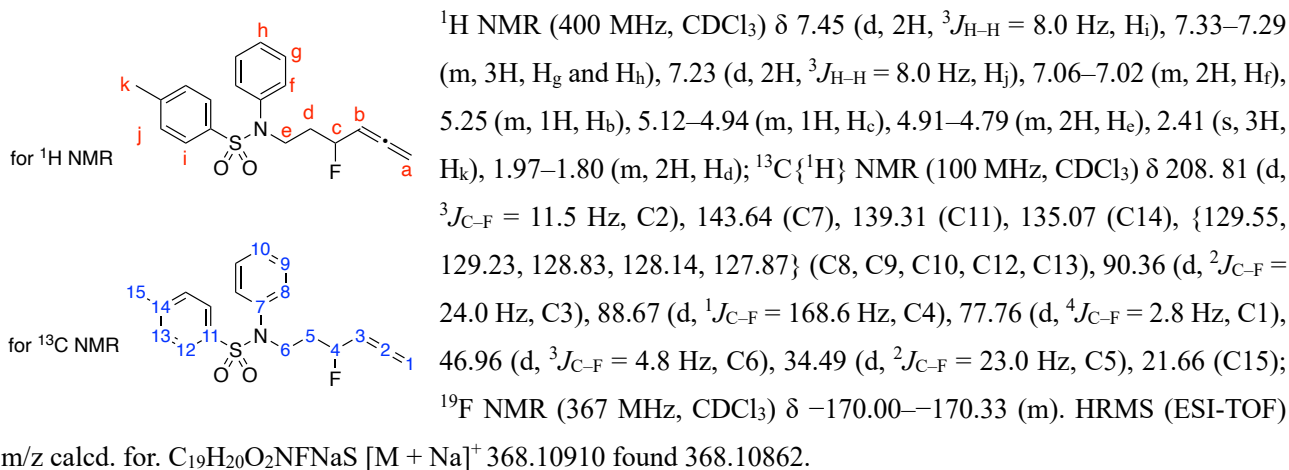

#### (4-fluoro-5-methylhepta-5,6-dien-1-yl)benzene (**8p**)

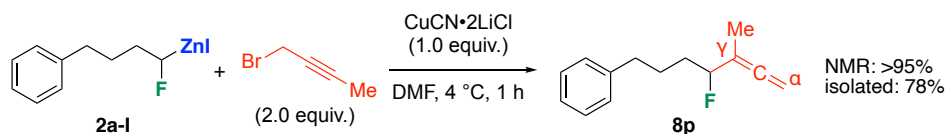

To a test tube equipped with a magnetic stir bar were added freshly prepared **2a-I** in DMF (0.40 mL, 0.25 M, 0.10 mmol). After the solution was cooled to 4 °C, 1-bromobut-2-yne (17.9 μL, 0.20 mmol, 2.0 equiv.) and CuCN•2LiCl in THF (0.10 mL, 1.0 M, 0.10 mmol) were subsequently added to the solution. The reaction mixture was further stirred for 1 hour at 4 °C and then poured into a slurry of silica gel in hexane. The slurry was then filtered and washed with hexane/EtOAc. The resulted solution was concentrated under reduced pressure to give crude mixture. The NMR yield of **8p** was determined to be >95% yield respectively by <sup>1</sup>H NMR spectroscopy using 1,1,2,2-tetrachloroethane as an internal standard. The crude mixture was purified by column chromatography using hexane as eluent to give mixture of **8p** as colorless oil (15.9 mg, 78% yield).

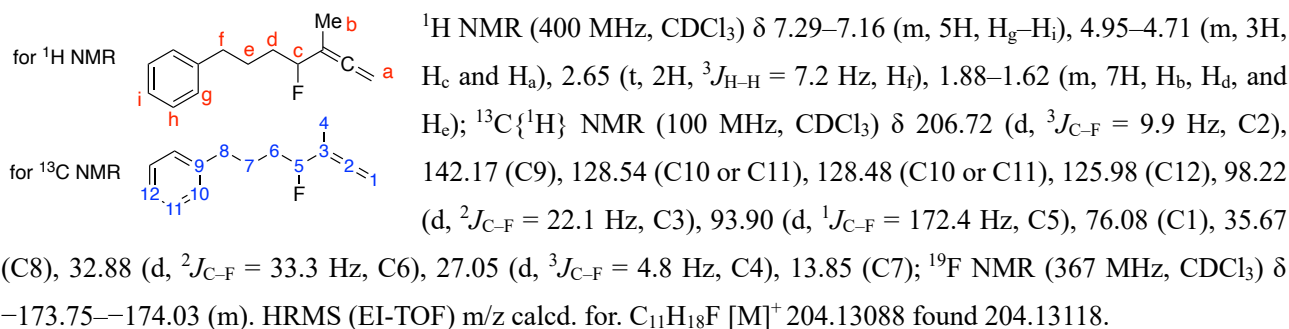

(4-fluorohepta-5,6-diene-1,5-diyl)dibenzene (**8q**)

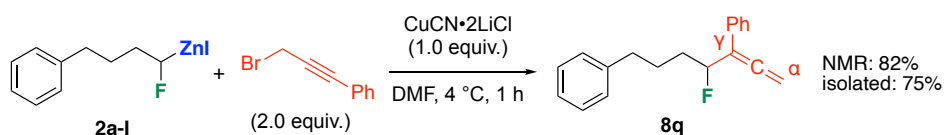

To a test tube equipped with a magnetic stir bar were added freshly prepared **2a-I** in DMF (0.40 mL, 0.25 M, 0.10 mmol). After the solution was cooled to 4 °C, (3-bromoprop-1-yn-1-yl)benzene (28.3  $\mu\text{L}$ , 0.20 mmol, 2.0 equiv.) and CuCN $\cdot$ 2LiCl in THF (0.10 mL, 1.0 M, 0.10 mmol) were subsequently added to the solution. The reaction mixture was further stirred for 1 hour at 4 °C and then poured into a slurry of silica gel in hexane. The slurry was then filtered and washed with hexane/EtOAc. The resulted solution was concentrated under reduced pressure to give crude mixture. The NMR yield of **8q** was determined to be 82% yield respectively by  $^1\text{H}$  NMR spectroscopy using 1,1,2,2-tetrachloroethane as an internal standard. The crude mixture was purified by column chromatography using hexane as eluent to give mixture of **8q** as colorless oil (19.9 mg, 75% yield).

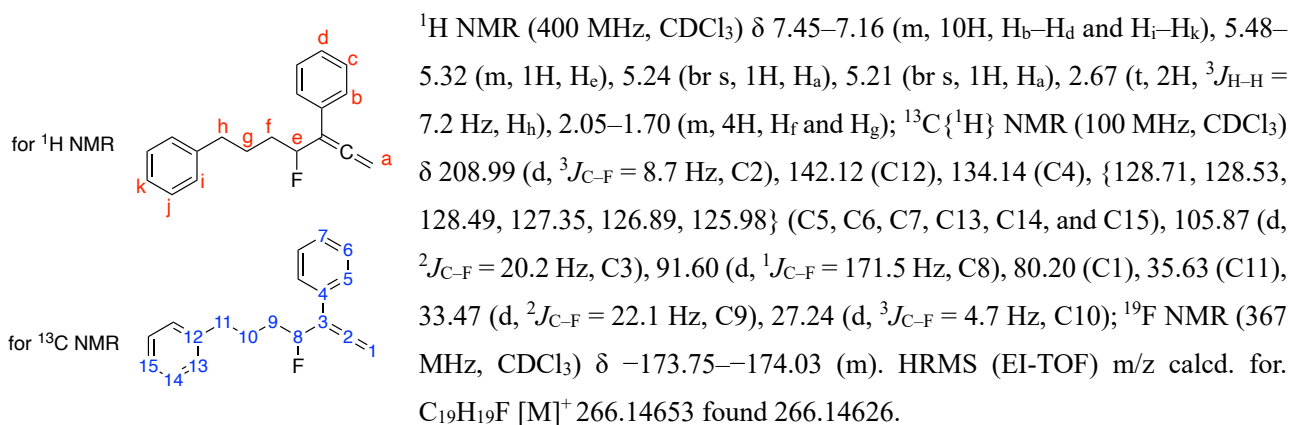

(3-fluorohex-1-yne-1,6-diyl)dibenzene (**8r**)

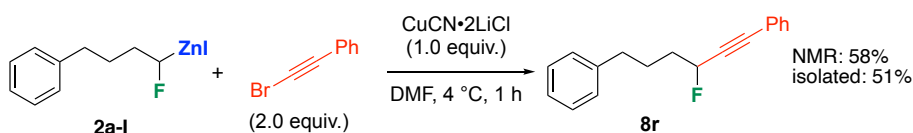

To a test tube equipped with a magnetic stir bar were added freshly prepared **2a-I** in DMF (0.40 mL, 0.25 M, 0.10 mmol). After the solution was cooled to 4 °C, (bromoethynyl)benzene (12.0  $\mu\text{L}$ , 0.20 mmol, 2.0 equiv.) and CuCN $\cdot$ 2LiCl in THF (0.10 mL, 1.0 M, 0.10 mmol) were subsequently added to the solution. The reaction mixture was further stirred for 1 hour at 4 °C and then poured into a slurry of silica gel in hexane. The slurry was then filtered and washed with hexane/EtOAc. The resulted solution was concentrated under reduced pressure to give crude mixture. The NMR yield of **8r** was determined to be 58% yield respectively by  $^1\text{H}$  NMR spectroscopy using 1,1,2,2-tetrachloroethane as an internal standard. The crude mixture was purified by preparative TLC using hexane as eluent to give mixture of **8r** as yellow oil (12.9 mg, 51% yield).

for  $^1\text{H}$  NMR 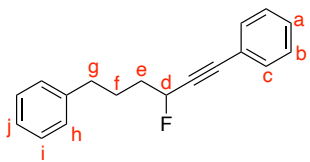  $^1\text{H}$  NMR (400 MHz,  $\text{CDCl}_3$ )  $\delta$  7.46–7.20 (m, 10H,  $\text{H}_a$ – $\text{H}_c$  and  $\text{H}_h$ – $\text{H}_j$ ), 5.33 (dt, 1H,  $^2J_{\text{H-F}} = 49.2$  Hz,  $^3J_{\text{H-H}} = 6.0$  Hz,  $\text{H}_d$ ), 2.72 (t, 2H,  $^3J_{\text{H-H}} = 7.2$  Hz,  $\text{H}_g$ ), 2.05–1.83 (m, 4H,  $\text{H}_e$  and  $\text{H}_f$ );  $^{13}\text{C}\{^1\text{H}\}$  NMR (100 MHz,  $\text{CDCl}_3$ )  $\delta$  141.87 (C11), 131.97 (d,  $^5J_{\text{C-F}} = 2.9$  Hz, C3), {129.05, 128.58, 128.55, 128.48, 126.09} (C1, C2, C12, C13, C14), 122.04 (d,  $^4J_{\text{C-F}} = 3.8$  Hz, C3), 88.19 (d,  $^3J_{\text{C-F}} = 10.5$  Hz, C5), 85.62 (d,  $^2J_{\text{C-F}} = 25.9$  Hz, C6), 35.63 (d,  $^2J_{\text{C-F}} = 23.0$  Hz, C8), 35.44 (C10), 25.38 (d,  $^3J_{\text{C-F}} = 3.8$  Hz, C9);  $^{19}\text{F}$  NMR (367 MHz,  $\text{CDCl}_3$ )  $\delta$  –170.13 (dt,  $^2J_{\text{H-F}} = 48.1$  Hz,  $^3J_{\text{H-F}} = 19.1$  Hz). HRMS (EI-TOF)  $m/z$  calcd. for.  $\text{C}_{18}\text{H}_{17}\text{F}$   $[\text{M}]^+$  252.13088 found 252.13139.

(3-fluoro-6-phenylhex-1-yn-1-yl)triisopropylsilane (**8s**)

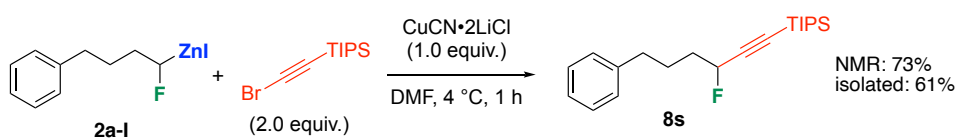

To a test tube equipped with a magnetic stir bar were added freshly prepared **2a-I** in DMF (0.40 mL, 0.25 M, 0.10 mmol). After the solution was cooled to 4 °C, (bromoethynyl)triisopropylsilane (48.7  $\mu\text{L}$ , 0.20 mmol, 2.0 equiv.) and  $\text{CuCN}\cdot 2\text{LiCl}$  in THF (0.10 mL, 1.0 M, 0.10 mmol) were subsequently added to the solution. The reaction mixture was further stirred for 1 hour at 4 °C and then poured into a slurry of silica gel in hexane. The slurry was then filtered and washed with hexane/EtOAc. The resulted solution was concentrated under reduced pressure to give crude mixture. The NMR yield of **8s** was determined to be 73% yield respectively by  $^1\text{H}$  NMR spectroscopy using 1,1,2,2-tetrachloroethane as an internal standard. The crude mixture was purified by preparative TLC using hexane as eluent to give mixture of **8s** as yellow oil (20.4 mg, 61% yield).

for  $^1\text{H}$  NMR 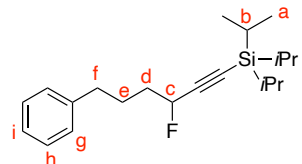  $^1\text{H}$  NMR (400 MHz,  $\text{CDCl}_3$ )  $\delta$  7.30–7.16 (m, 5H,  $\text{H}_g$ – $\text{H}_i$ ), 5.92–5.04 (m, 1H,  $\text{H}_c$ ), 2.67 (t, 2H,  $^3J_{\text{H-H}} = 8.4$  Hz,  $\text{H}_f$ ), 1.93–1.80 (m, 4H,  $\text{H}_d$  and  $\text{H}_e$ ), 1.08–1.06 (m, 21H,  $\text{H}_a$  and  $\text{H}_b$ );  $^{13}\text{C}\{^1\text{H}\}$  NMR (100 MHz,  $\text{CDCl}_3$ )  $\delta$  141.90 (C9), 128.52 (C10 and C11, overlapped), 126.03 (C12), 103.76 (d,  $^2J_{\text{C-F}} = 25.0$  Hz, C4), 93.03 (d,  $^3J_{\text{C-F}} = 8.6$  Hz, C3), 82.90 (d,  $^1J_{\text{C-F}} = 167.7$  Hz, C5), 35.69 (d,  $^2J_{\text{C-F}} = 23.0$  Hz, C6), 35.41 (C8), 26.30 (d,  $^3J_{\text{C-F}} = 3.8$  Hz, C7), 18.67 (C1), 11.19 (C2);  $^{19}\text{F}$  NMR (367 MHz,  $\text{CDCl}_3$ )  $\delta$  –170.18–170.41 (m). HRMS (ESI-TOF)  $m/z$  calcd. for.  $\text{C}_{21}\text{H}_{33}\text{FNaSi}$   $[\text{M} + \text{Na}]^+$  355.22278 found 355.22221.

*tert*-butyl((4-fluoro-7-phenylhept-2-yn-1-yl)oxy)diphenylsilane (**8t**)

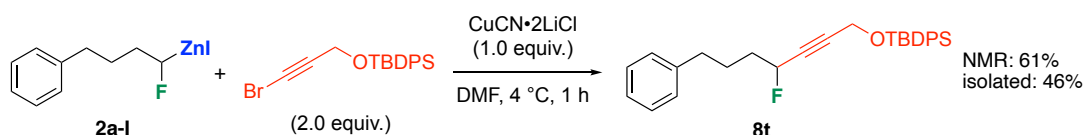

To a test tube equipped with a magnetic stir bar were added freshly prepared **2a-I** in DMF (0.40 mL, 0.25 M, 0.10 mmol). After the solution was cooled to 4 °C, (bromoethynyl)triisopropylsilane (61.2  $\mu\text{L}$ , 0.20 mmol, 2.0 equiv.) and  $\text{CuCN}\cdot 2\text{LiCl}$  in THF (0.10 mL, 1.0 M, 0.10 mmol) were subsequently added to the solution. The reaction mixture was further stirred for 1 hour at 4 °C and then poured into a slurry of silica gel in hexane. The slurry was

then filtered and washed with hexane/EtOAc. The resulted solution was concentrated under reduced pressure to give crude mixture. The NMR yield of **8t** was determined to be 61% yield respectively by <sup>1</sup>H NMR spectroscopy using 1,1,2,2-tetrachloroethane as an internal standard. The crude mixture was purified by preparative TLC using hexane as eluent to give mixture of **8t** as colorless oil (20.3 mg, 46% yield).

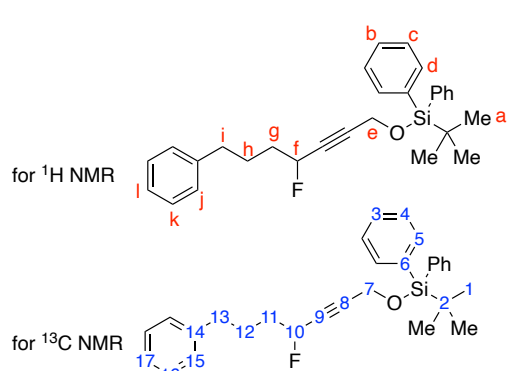

<sup>1</sup>H NMR (400 MHz, CDCl<sub>3</sub>) δ 7.70 (dd, 4H, <sup>3</sup>J<sub>H-H</sub> = 8.8 Hz, <sup>4</sup>J<sub>H-H</sub> = 1.2 Hz, H<sub>d</sub>), 7.44–7.16 (m, 11H, H<sub>b</sub>, H<sub>c</sub>, H<sub>j</sub>, H<sub>k</sub> and H<sub>i</sub>), 5.08 (dt, 1H, <sup>2</sup>J<sub>H-F</sub> = 50.0 Hz, <sup>3</sup>J<sub>H-H</sub> = 6.4 Hz, H<sub>f</sub>), 4.37 (dd, 2H, <sup>5</sup>J<sub>H-F</sub> = 6.8 Hz, <sup>5</sup>J<sub>H-H</sub> = 1.2 Hz, H<sub>e</sub>), 2.65 (t, 2H, <sup>3</sup>J<sub>H-H</sub> = 7.2 Hz, H<sub>g</sub>), 1.85–1.73 (m, 4H, H<sub>g</sub> and H<sub>h</sub>), 1.07 (s, 9H, H<sub>a</sub>); <sup>13</sup>C {<sup>1</sup>H} NMR (100 MHz, CDCl<sub>3</sub>) δ 141.83 (C14), {135.75, 133.06, 129.99, 128.55, 128.52, 127.86, 126.06} (C3, C4, C5, C6, C15, C16, C17), 86.91 (d, <sup>3</sup>J<sub>C-F</sub> = 10.5 Hz, C8), 82.66 (d, <sup>1</sup>J<sub>C-F</sub> = 169.8 Hz, C10), 81.81 (d, <sup>2</sup>J<sub>C-F</sub> = 26.7 Hz, C9), 52.66 (d, <sup>4</sup>J<sub>C-F</sub> = 2.8 Hz, C7), 35.41 (C13), 35.36 (d, <sup>2</sup>J<sub>C-F</sub> = 22.9 Hz,

C11), 26.80 (C1), 26.24 (d, <sup>3</sup>J<sub>C-F</sub> = 3.9 Hz, C12), 19.30 (C2); <sup>19</sup>F NMR (367 MHz, CDCl<sub>3</sub>) δ -171.17–-171.44 (m). HRMS (ESI-TOF) m/z calcd. for. C<sub>29</sub>H<sub>33</sub>OFNaSi [M + Na]<sup>+</sup> 467.21769 found 467.21718.

#### 1-chloro-4-(3-fluoro-6-phenylhex-1-yn-1-yl)benzene (**8u**)

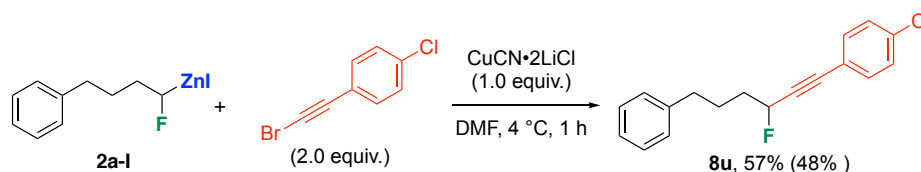

To a test tube equipped with a magnetic stir bar were added 1-(bromoethynyl)-4-chlorobenzene (43.1 mg, 0.20 mmol, 2.0 equiv.) and DMF (0.20 mL). After the solution was cooled to 4 °C, freshly prepared **2a-I** in DMF (0.40 mL, 0.25 M, 0.10 mmol) and CuCN·2LiCl in THF (0.10 mL, 1.0 M, 0.10 mmol, 1.0 equiv.) were subsequently added to the solution. The reaction mixture was further stirred for 1 hour at 4 °C and then poured into a slurry of silica gel in hexane. The slurry was then filtered and washed with hexane/EtOAc. The resulted solution was concentrated under reduced pressure to give crude mixture. The resulted solution was concentrated under reduced pressure to give crude mixture. The NMR yield of **8u** was determined to be 57% yield respectively by <sup>1</sup>H NMR spectroscopy using 1,1,2,2-tetrachloroethane as an internal standard. The crude mixture was purified by preparative TLC using hexane as eluent to give mixture of **8u** as white amorphous solid (13.8 mg, 48% yield).

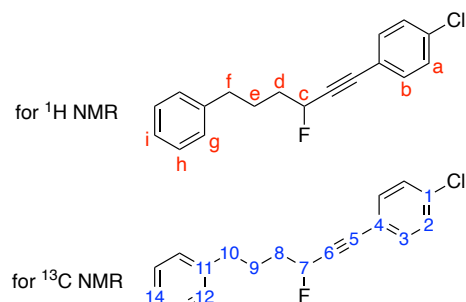

<sup>1</sup>H NMR (500 MHz, CDCl<sub>3</sub>) δ 7.27–7.20 (m, 9H, H<sub>a</sub>, H<sub>b</sub>, and H<sub>g</sub>–H<sub>i</sub>), 5.33 (dt, 1H, <sup>2</sup>J<sub>H-F</sub> = 48.0 Hz, <sup>3</sup>J<sub>H-H</sub> = 5.8 Hz, H<sub>c</sub>), 2.72 (t, 2H, <sup>3</sup>J<sub>H-H</sub> = 7.3 Hz, H<sub>f</sub>), 2.15–1.82 (m, 4H, H<sub>d</sub> and H<sub>e</sub>); <sup>13</sup>C {<sup>1</sup>H} NMR (125 MHz, CDCl<sub>3</sub>) δ 141.79 (C11), 135.19 (C1), {133.21, 133.19, 128.86, 128.56, 126.12} (C2, C3, C12, C13, and C14), 120.51 (d, <sup>4</sup>J<sub>C-F</sub> = 3.6 Hz, C4), 87.40 (d, <sup>3</sup>J<sub>C-F</sub> = 10.1 Hz, C5), 86.59 (d, <sup>2</sup>J<sub>C-F</sub> = 25.5 Hz, C6), 83.03 (d, <sup>1</sup>J<sub>C-F</sub> = 166.5 Hz, C7), 35.53 (d, <sup>2</sup>J<sub>C-F</sub> = 22.5 Hz, C8), 35.41 (C10), 26.35

(d, <sup>3</sup>J<sub>C-F</sub> = 3.6 Hz, C5); <sup>19</sup>F NMR (470 MHz, CDCl<sub>3</sub>) δ -172.13 (dt, <sup>2</sup>J<sub>H-F</sub> = 48.8 Hz, <sup>3</sup>J<sub>H-F</sub> = 19.8 Hz). HRMS (EI-TOF) m/z calcd. for. C<sub>18</sub>H<sub>16</sub>ClF [M]<sup>+</sup> 286.09191 found 286.09177.

### 3-(3-fluoro-6-phenylhex-1-yn-1-yl)thiophene (**8v**)

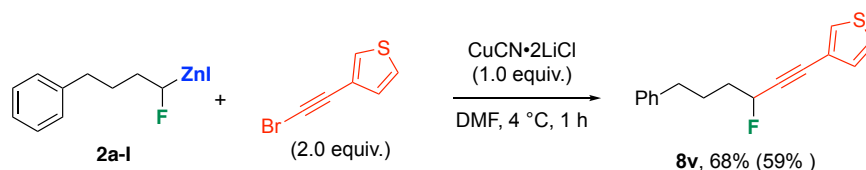

To a test tube equipped with a magnetic stir bar were added 1-(bromoethynyl)-3-thiophene (37.4 mg, 0.20 mmol, 2.0 equiv.) and DMF (0.20 mL). After the solution was cooled to 4 °C, freshly prepared **2a-I** in DMF (0.40 mL, 0.25 M, 0.10 mmol) and CuCN·2LiCl in THF (0.10 mL, 1.0 M, 0.10 mmol, 1.0 equiv.) were subsequently added to the solution. The reaction mixture was further stirred for 1 hour at 4 °C and then poured into a slurry of silica gel in hexane. The slurry was then filtered and washed with hexane/EtOAc. The resulted solution was concentrated under reduced pressure to give crude mixture. The resulted solution was concentrated under reduced pressure to give crude mixture. The NMR yield of **8v** was determined to be 68% yield respectively by <sup>1</sup>H NMR spectroscopy using 1,1,2,2-tetrachloroethane as an internal standard. The crude mixture was purified by preparative TLC using hexane as eluent to give mixture of **8v** as colorless oil (15.2 mg, 59% yield).

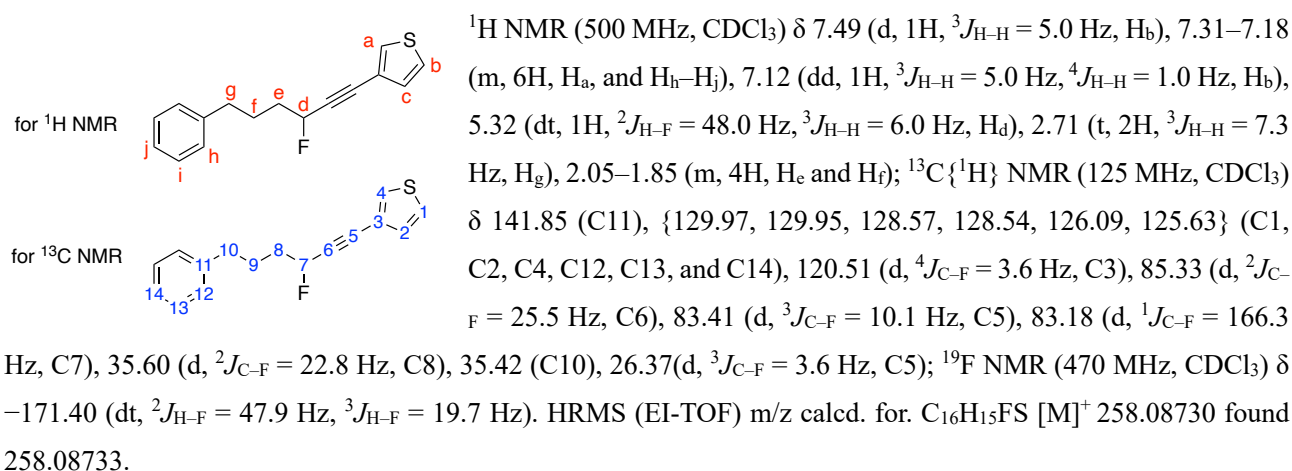

### 3-(1-fluoro-4-phenylbutyl)cyclohex-2-en-1-one (**8c**)

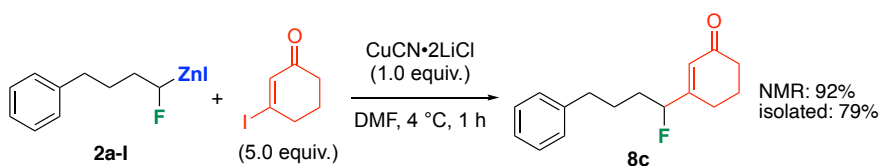

To a test tube equipped with a magnetic stir bar were added freshly prepared **2a-I** in DMF (0.40 mL, 0.25 M, 0.10 mmol). After the solution was cooled to 4 °C, 3-iodocyclohex-2-en-1-one (60.0 μL, 0.50 mmol, 5.0 equiv.) and CuCN·2LiCl in THF (0.10 mL, 1.0 M, 0.10 mmol) were subsequently added to the solution. The reaction mixture was further stirred for 1 hour at 4 °C and then quenched with H<sub>2</sub>O. The solution was extracted with hexane/EtOAc and dried over Na<sub>2</sub>SO<sub>4</sub>. The resulted solution was concentrated under reduced pressure to give crude mixture. The NMR yield of **8c** was determined to be 92% yield respectively by <sup>1</sup>H NMR spectroscopy using 1,1,2,2-tetrachloroethane as an internal standard. The crude mixture was purified by preparative TLC using hexane/EtOAc = 10/1 as eluent to give mixture of **8c** as colorless oil (19.4 mg, 79% yield).

for  $^1\text{H}$  NMR 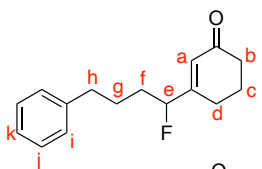  $^1\text{H}$  NMR (500 MHz,  $\text{CDCl}_3$ )  $\delta$  7.29–7.15 (m, 5H,  $\text{H}_i$ – $\text{H}_k$ ), 6.01 (s, 1H,  $\text{H}_a$ ), 4.95 (dt, 1H,  $^2J_{\text{H-F}} = 48.5$  Hz,  $^3J_{\text{H-H}} = 5.3$  Hz,  $\text{H}_e$ ), 2.69–2.63 (m, 2H,  $\text{H}_b$ ), 2.39 (t, 2H,  $^3J_{\text{H-H}} = 6.8$  Hz,  $\text{H}_h$ ), 2.29–2.15 (m, 2H,  $\text{H}_d$ ), 2.03–1.97 (m, 2H,  $\text{H}_c$ ), 1.82–1.70 (m, 4H,  $\text{H}_f$  and  $\text{H}_g$ );  $^{13}\text{C}\{^1\text{H}\}$  NMR (100 MHz\*,  $\text{CDCl}_3$ )  $\delta$  199.34 (C2), 161.40 (d,  $^2J_{\text{C-F}} = 17.2$  Hz, C6), 141.58 (C11), 128.58 (C12 or C13), 128.51 (C12 or C13), 126.16 (C14), 124.70 (d,  $^3J_{\text{C-F}} = 9.5$  Hz, C1), 93.51 (d,  $^1J_{\text{C-F}} = 179.3$  Hz, C7), 37.84 (C3), 35.44 (C10), 32.94 (d,  $^2J_{\text{C-F}} = 22.9$  Hz, C8), 26.39 (d,  $^3J_{\text{C-F}} = 2.9$  Hz, C5), 24.91 (d,  $^3J_{\text{C-F}} = 2.8$  Hz, C9), 22.60 (C4);  $^{19}\text{F}$  NMR (470 MHz,  $\text{CDCl}_3$ )  $\delta$  –182.62––182.88 (m). HRMS (ESI-TOF)  $m/z$  calcd. for  $\text{C}_{16}\text{H}_{19}\text{OFNa}$  [ $\text{M} + \text{Na}$ ] $^+$  269.13121, found 269.13079.

\*400 MHz NMR was used for  $^{13}\text{C}$  NMR spectroscopy analysis.

### 3-(1-fluoro-4-phenylbutyl)cyclopent-2-en-1-one (**8w**)

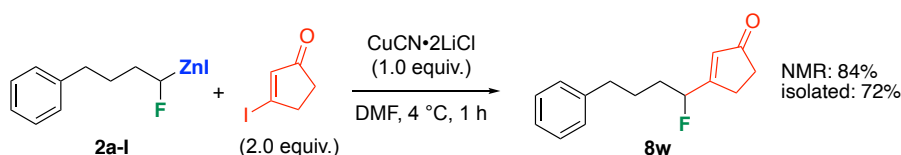

To a test tube equipped with a magnetic stir bar were added freshly prepared **2a-I** in DMF (0.40 mL, 0.25 M, 0.10 mmol). After the solution was cooled to 4 °C, 3-iodocyclopent-2-en-1-one in DMF (0.10 mL, 2.0 M, 0.20 mmol, 2.0 equiv.) and  $\text{CuCN}\cdot 2\text{LiCl}$  in THF (0.10 mL, 1.0 M, 0.10 mmol) were subsequently added to the solution. The reaction mixture was further stirred for 1 hour at 4 °C and then quenched with  $\text{H}_2\text{O}$ . The solution was extracted with hexane/EtOAc and dried over  $\text{Na}_2\text{SO}_4$ . The resulted solution was concentrated under reduced pressure to give crude mixture. The NMR yield of **8w** was determined to be 84% yield respectively by  $^1\text{H}$  NMR spectroscopy using 1,1,2,2-tetrachloroethane as an internal standard. The crude mixture was purified by preparative TLC using hexane/EtOAc = 10/1 as eluent to give mixture of **8w** as colorless oil (16.8 mg, 72% yield).

for  $^1\text{H}$  NMR 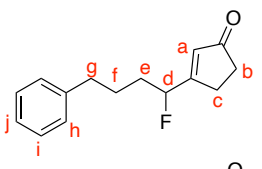  $^1\text{H}$  NMR (400 MHz,  $\text{CDCl}_3$ )  $\delta$  7.30–7.15 (m, 5H,  $\text{H}_h$ – $\text{H}_j$ ), 6.01 (s, 1H,  $\text{H}_a$ ), 5.27 (dt, 1H,  $^2J_{\text{H-F}} = 48.4$  Hz,  $^3J_{\text{H-H}} = 5.6$  Hz,  $\text{H}_d$ ), 2.72–2.65 (m, 2H,  $\text{H}_b$ ), 2.58–2.55 (m, 2H,  $\text{H}_c$ ), 2.43 (m, 2H,  $\text{H}_g$ ), 1.89–1.76 (m, 4H,  $\text{H}_e$  and  $\text{H}_f$ );  $^{13}\text{C}\{^1\text{H}\}$  NMR (100 MHz,  $\text{CDCl}_3$ )  $\delta$  208.65 (C2), 177.72 (d,  $^2J_{\text{C-F}} = 21.0$  Hz, C5), 141.50 (C10), 129.29 (d,  $^3J_{\text{C-F}} = 5.7$  Hz, C1), 128.60 (C11 or C12), 128.51 (C11 or C12), 126.21 (C13), 91.56 (d,  $^1J_{\text{C-F}} = 176.4$  Hz, C6), 35.42 (C3), 34.91 (C9), 33.25 (d,  $^2J_{\text{C-F}} = 22.9$  Hz, C7), 27.51 (d,  $^3J_{\text{C-F}} = 4.8$  Hz, C4), 26.23 (d,  $^3J_{\text{C-F}} = 2.9$  Hz, C8);  $^{19}\text{F}$  NMR (367 MHz,  $\text{CDCl}_3$ )  $\delta$  –183.26––183.52 (m). HRMS (ESI-TOF)  $m/z$  calcd. for  $\text{C}_{15}\text{H}_{17}\text{OFNa}$  [ $\text{M} + \text{Na}$ ] $^+$  255.11556, found 255.11531.

### ethyl (Z)-4-fluoro-3,7-diphenylhept-2-enoate (**8x**)

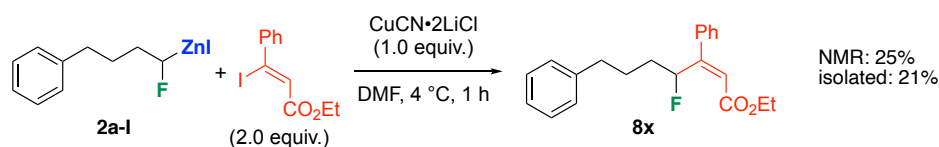



To a test tube equipped with a magnetic stir bar were added freshly prepared **2a-I** in DMF (0.40 mL, 0.25 M, 0.10 mmol). After the solution was cooled to 4 °C, ethyl (Z)-3-iodo-3-phenylacrylate (38.0 μL, 0.20 mmol, 2.0 equiv.) and CuCN·2LiCl in THF (0.10 mL, 1.0 M, 0.10 mmol) were subsequently added to the solution. The reaction mixture was further stirred for 1 hour at 4 °C and then poured into a slurry of silica gel in hexane. The slurry was then filtered and washed with hexane/EtOAc. The resulted solution was concentrated under reduced pressure to give crude mixture. The NMR yield of **8x** was determined to be 25% yield respectively by <sup>1</sup>H NMR spectroscopy using 1,1,2,2-tetrachloroethane as an internal standard. The crude mixture was purified by preparative TLC using hexane/EtOAc = 20/1 as eluent to give mixture of **8x** as colorless oil (7.1 mg, 21% yield).

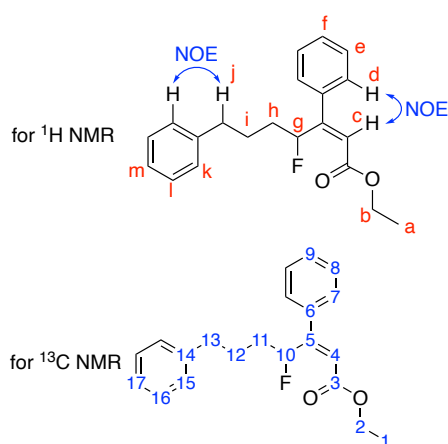

<sup>1</sup>H NMR (400 MHz, CDCl<sub>3</sub>) δ 7.40–7.15 (m, 10H, H<sub>d</sub>–H<sub>f</sub> and H<sub>k</sub>–H<sub>m</sub>), 6.49 (ddd, 1H, H<sub>c</sub>, <sup>2</sup>J<sub>H-F</sub> = 50.0 Hz, <sup>3</sup>J<sub>H-H</sub> = 9.0 Hz, <sup>3</sup>J<sub>H-H</sub> = 3.6 Hz, H<sub>g</sub>), 5.95 (s, 1H, H<sub>e</sub>), 4.20 (q, 2H, <sup>3</sup>J<sub>H-H</sub> = 6.8 Hz, H<sub>b</sub>), 2.65 (t, 2H, <sup>3</sup>J<sub>H-H</sub> = 7.2 Hz, H<sub>j</sub>), 1.98–1.70 (m, 4H, H<sub>h</sub> and H<sub>i</sub>), 1.29 (t, 3H, <sup>3</sup>J<sub>H-H</sub> = 6.8 Hz, H<sub>a</sub>); <sup>13</sup>C{<sup>1</sup>H} NMR (100 MHz, CDCl<sub>3</sub>) δ 165.57 (C3), 157.64 (d, <sup>2</sup>J<sub>C-F</sub> = 20.1 Hz, C5), 142.90 (C14), 137.51 (C6), {128.93, 128.52, 128.43, 128.27, 125.89} (C7, C8, C9, C15, C16, and C17, overlapped), 120.52 (C4), 90.53 (d, <sup>1</sup>J<sub>C-F</sub> = 167.7 Hz, C10), 60.65 (C2), 35.52 (C13), 34.67 (d, <sup>2</sup>J<sub>C-F</sub> = 20.1 Hz, C11), 27.35 (C12), 14.36 (C1); <sup>19</sup>F NMR (367 MHz, CDCl<sub>3</sub>) δ -172.0 (ddd, <sup>2</sup>J<sub>H-F</sub> = 48.7 Hz, <sup>3</sup>J<sub>H-F</sub> = 32.9 Hz, <sup>3</sup>J<sub>H-F</sub> = 14.9 Hz). HRMS

(ESI-TOF) m/z calcd. for C<sub>21</sub>H<sub>23</sub>O<sub>2</sub>FNa [M + Na]<sup>+</sup> 349.15743, found 349.15707.

#### 4-fluoro-1,7-diphenylheptan-3-one (**8y**)

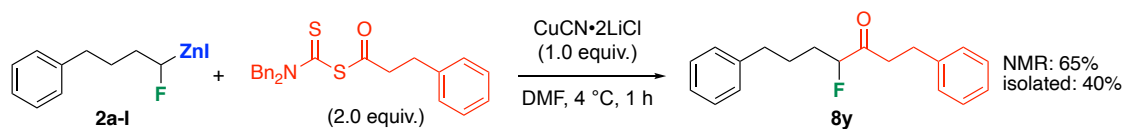

To a test tube equipped with a magnetic stir bar were added freshly prepared **2a-I** in DMF (0.40 mL, 0.25 M, 0.10 mmol). After the solution was cooled to 4 °C, **7r** (81.12 mg, 0.20 mmol, 2.0 equiv.) and CuCN·2LiCl in THF (0.10 mL, 1.0 M, 0.10 mmol) were subsequently added to the solution. The reaction mixture was further stirred for 1 hour at 4 °C and then poured into a slurry of silica gel in hexane. The slurry was then filtered and washed with hexane/EtOAc. The resulted solution was concentrated under reduced pressure to give crude mixture. The NMR yield of **8y** was determined to be 65% yield respectively by <sup>1</sup>H NMR spectroscopy using 1,1,2,2-tetrachloroethane as an internal standard. The crude mixture was purified by preparative TLC using toluene to give **8y** with impurities. The obtained mixture was further purified by preparative TLC using hexane/EtOAc = 20/1 as eluent to give **8y** as colorless oil (11.37 mg, 40% yield).

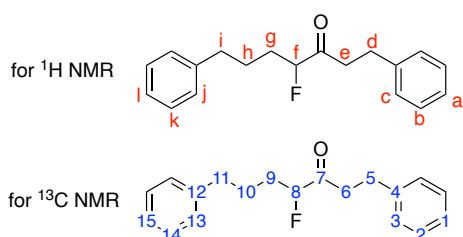

<sup>1</sup>H NMR (400 MHz, CDCl<sub>3</sub>) δ 7.29–7.13 (m, 10H, H<sub>a</sub>–H<sub>c</sub> and H<sub>j</sub>–H<sub>l</sub>), 4.81–4.66 (m, 1H, H<sub>f</sub>), 2.90–2.89 (m, 4H, H<sub>d</sub> and H<sub>i</sub>), 2.61 (t, 2H, <sup>3</sup>J<sub>H-H</sub> = 7.2 Hz, H<sub>e</sub>), 1.85–1.70 (m, 4H, H<sub>g</sub> and H<sub>h</sub>); <sup>13</sup>C{<sup>1</sup>H} NMR (100 MHz, CDCl<sub>3</sub>) δ 209.29 (d, <sup>2</sup>J<sub>C-F</sub> = 24.9 Hz, C7), 141.56 (C4 or C12), 140.87 (C4 or C12), {128.65, 128.55, 128.52} (C2, C3, C13, and C14, overlapped), 126.36 (C1 or C15), 126.14 (C1 or C15), 96.00 (d, <sup>1</sup>J<sub>C-F</sub> =

183.1 Hz, C8), 39.87 (C5), 35.46 (C11), 31.58 (d,  $^2J_{C-F}$  = 20.0 Hz, C9), 28.83 (C6), 26.33 (C10);  $^{19}\text{F}$  NMR (367 MHz,  $\text{CDCl}_3$ )  $\delta$  -190.39–190.52. HRMS (ESI-TOF)  $m/z$  calcd. for.  $\text{C}_{19}\text{H}_{21}\text{OFNa}$   $[\text{M} + \text{Na}]^+$  307.14686, found 307.14639.

#### 2-fluoro-1,5-diphenylpentan-1-one (**8z**)

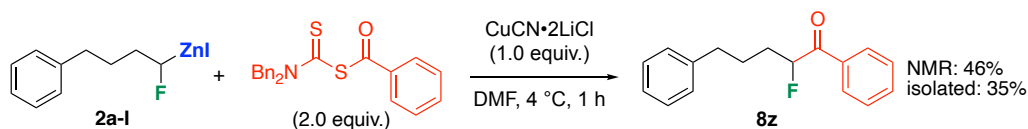

To a test tube equipped with a magnetic stir bar were added freshly prepared **2a-I** in DMF (0.40 mL, 0.25 M, 0.10 mmol). After the solution was cooled to 4 °C, **7s** (75.51 mg, 0.20 mmol, 2.0 equiv.) and  $\text{CuCN}\cdot 2\text{LiCl}$  in THF (0.10 mL, 1.0 M, 0.10 mmol) were subsequently added to the solution. The reaction mixture was further stirred for 1 hour at 4 °C and then quenched with  $\text{H}_2\text{O}$ . The solution was extracted with hexane/EtOAc and dried over  $\text{Na}_2\text{SO}_4$ . The resulted solution was concentrated under reduced pressure to give crude mixture. The NMR yield of **8z** was determined to be 46% yield respectively by  $^1\text{H}$  NMR spectroscopy using 1,1,2,2-tetrachloroethane as an internal standard. The crude mixture was purified by preparative TLC using toluene as eluent to give **8z** with impurities. The obtained mixture was further purified by preparative TLC using hexane/EtOAc = 20/1 as eluent to give **8z** as colorless oil (9.0 mg, 35% yield).

for  $^1\text{H}$  NMR  $^1\text{H}$  NMR (400 MHz,  $\text{CDCl}_3$ )  $\delta$  7.95–7.15 (m, 10H,  $\text{H}_a$ – $\text{H}_c$  and  $\text{H}_h$ – $\text{H}_j$ ), 5.64–5.44 (m, 1H,  $\text{H}_d$ ), 2.68 (t, 2H,  $^3J_{\text{H-H}}$  = 15.1 Hz,  $\text{H}_g$ ), 2.07–1.80 (m, 4H,  $\text{H}_e$  and  $\text{H}_f$ );  $^{13}\text{C}\{^1\text{H}\}$  NMR (100 MHz,  $\text{CDCl}_3$ );  $\delta$  196.86 (d,  $^2J_{\text{C-F}}$  = 19.3 Hz, C7), 141.52 (C10), 134.33 (C1), 133.88 (C2), 129.00 (d,  $^3J_{\text{C-F}}$  = 3.9 Hz, C4), {128.87, 128.56, 128.52} (C3, C11, and C12), 126.14 (C13), 93.77 (d,  $^1J_{\text{C-F}}$  = 183.0 Hz, C6), 35.36 (C9), 32.27 (d,  $^2J_{\text{C-F}}$  = 21.2 Hz, C6), 26.46 (d,  $^3J_{\text{C-F}}$  = 2.9 Hz, C8);  $^{19}\text{F}$  NMR (367 MHz,  $\text{CDCl}_3$ )  $\delta$  -188.87–189.13 (m). HRMS (EI-TOF)  $m/z$  calcd. for.  $\text{C}_{17}\text{H}_{17}\text{FO}$   $[\text{M}]^+$  256.12579, found 256.12576.

#### 1-cyclopropyl-2-fluoro-5-phenylpentan-1-one (**8aa**)

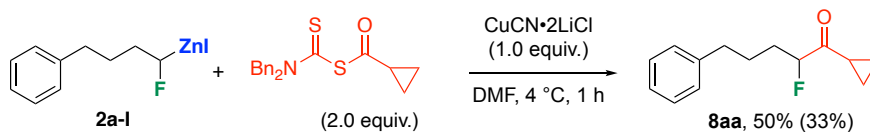

To a test tube equipped with a magnetic stir bar were added **7t** (68.3 mg, 0.20 mmol, 2.0 equiv.) and freshly prepared **2a-I** in DMF (0.40 mL, 0.25 M, 0.10 mmol). After the solution was cooled to 4 °C,  $\text{CuCN}\cdot 2\text{LiCl}$  in THF (0.10 mL, 1.0 M, 0.10 mmol, 1.0 equiv.) was added to the solution. The reaction mixture was further stirred for 1 hour at 4 °C and then poured into a slurry of silica gel in hexane. The slurry was then filtered and washed with hexane/EtOAc. The resulted solution was concentrated under reduced pressure to give crude mixture. The resulted solution was concentrated under reduced pressure to give crude mixture. The NMR yield of **8aa** was determined to be 50% yield respectively by  $^1\text{H}$  NMR spectroscopy using 1,1,2,2-tetrachloroethane as an internal standard. The crude mixture was purified by column chromatography using hexane/EtOAc = 20/1 as eluent to give **8aa** with impurities. The obtained mixture was further purified by preparative TLC using toluene/hexane = 2/1 as eluent to give **8aa** as colorless oil (7.3 mg, 33% yield).



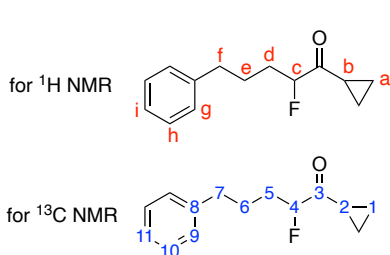

$^1\text{H}$  NMR (500 MHz,  $\text{CDCl}_3$ )  $\delta$  7.29–7.16 (m, 5H,  $\text{H}_g\text{--H}_i$ ), 4.86 (ddd, 1H,  $^2J_{\text{H-F}} = 50.4$  Hz,  $^3J_{\text{H-H}} = 7.1$  Hz,  $^3J_{\text{H-H}} = 4.6$  Hz,  $\text{H}_c$ ), 2.67–2.64 (m, 2H,  $\text{H}_f$ ), 2.34–2.27 (m, 1H,  $\text{H}_b$ ), 1.93–1.78 (m, 4H,  $\text{H}_d$  and  $\text{H}_e$ ), 1.11–1.08 (m, 2H,  $\text{H}_a$ ), 0.99–0.96 (m, 2H,  $\text{H}_a$ );  $^{13}\text{C}\{^1\text{H}\}$  NMR (125 MHz,  $\text{CDCl}_3$ )  $\delta$  209.58 (d,  $^2J_{\text{C-F}} = 23.4$  Hz, C3), 141.68 (C8), {128.55, 128.54} (C9 and C10), 126.11 (C11), 96.52 (d,  $^1J_{\text{C-F}} = 58.6$  Hz, C4), 35.51 (C7), 31.79 (d,  $^2J_{\text{C-F}} = 21.0$  Hz, C5), 26.36 (d,  $^3J_{\text{C-F}} = 3.0$  Hz, C6), 16.22 (d,  $^3J_{\text{C-F}} = 2.4$  Hz, C2), 12.28 (C1), 12.25 (C1);  $^{19}\text{F}$  NMR (470 MHz,  $\text{CDCl}_3$ )  $\delta$  -191.11–-191.36. HRMS (ESI-TOF)  $m/z$  calcd. for.  $\text{C}_{14}\text{H}_{17}\text{OFNa}$  [ $\text{M} + \text{Na}$ ] $^+$  243.11556, found 243.11521.

#### 4-fluoro-1-(methylthio)-7-phenylheptan-3-one (**8ab**)

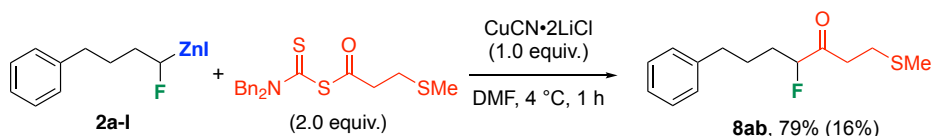

To a test tube equipped with a magnetic stir bar were added **7u** (75.5 mg, 0.20 mmol, 2.0 equiv.) and freshly prepared **2a-I** in DMF (0.40 mL, 0.25 M, 0.10 mmol). After the solution was cooled to 4 °C,  $\text{CuCN}\cdot 2\text{LiCl}$  in THF (0.10 mL, 1.0 M, 0.10 mmol, 1.0 equiv.) was added to the solution. The reaction mixture was further stirred for 1 hour at 4 °C and then poured into a slurry of silica gel in hexane. The slurry was then filtered and washed with hexane/EtOAc. The resulted solution was concentrated under reduced pressure to give crude mixture. The resulted solution was concentrated under reduced pressure to give crude mixture. The NMR yield of **8ab** was determined to be 79% yield respectively by  $^1\text{H}$  NMR spectroscopy using 1,1,2,2-tetrachloroethane as an internal standard. The crude mixture was purified by column chromatography using toluene/hexane = 20/1 as eluent to give **8ab** with impurities. The obtained mixture was further purified by preparative TLC twice using hexane/EtOAc = 20/1 and hexane/EtOAc/ $\text{CH}_2\text{Cl}_2$  = 20/20/1 as eluents to give **8ab** as pale brown oil (4.0 mg, 16% yield).

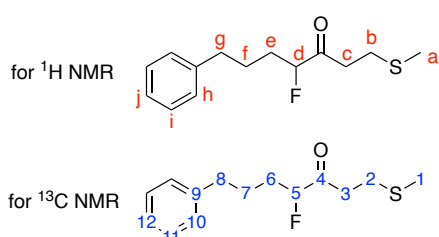

$^1\text{H}$  NMR (500 MHz,  $\text{CDCl}_3$ )  $\delta$  7.23–7.15 (m, 5H,  $\text{H}_h\text{--H}_j$ ), 4.77 (ddd, 1H,  $^2J_{\text{H-F}} = 50.3$  Hz,  $^3J_{\text{H-H}} = 7.8$  Hz,  $^3J_{\text{H-H}} = 4.0$  Hz,  $\text{H}_d$ ), 2.96–2.83 (m, 2H,  $\text{H}_c$ ), 2.72 (t, 2H,  $^3J_{\text{H-H}} = 7.3$  Hz,  $\text{H}_g$ ), 2.64 (t, 2H,  $^3J_{\text{H-H}} = 7.0$  Hz,  $\text{H}_g$ ), 2.10 (s, 3H,  $\text{H}_a$ ), 1.90–1.76 (m, 4H);  $^{13}\text{C}\{^1\text{H}\}$  NMR (125 MHz,  $\text{CDCl}_3$ )  $\delta$  208.55 (d,  $^2J_{\text{C-F}} = 25.3$  Hz, C4), 141.52 (C9), {128.75, 128.53} (C10 and C11), 126.16 (C12), 98.03 (d,  $^1J_{\text{C-F}} = 183.0$  Hz, C5), 38.26 (C2), 35.45

(C8), 31.56 (d,  $^2J_{\text{C-F}} = 20.6$  Hz, C6), 27.17 (d,  $^3J_{\text{C-F}} = 2.4$  Hz, C3), 26.34 (d,  $^3J_{\text{C-F}} = 2.4$  Hz, C7), 15.92 (C1);  $^{19}\text{F}$  NMR (470 MHz,  $\text{CDCl}_3$ )  $\delta$  -192.17–-192.38. HRMS (ESI-TOF)  $m/z$  calcd. for.  $\text{C}_{14}\text{H}_{19}\text{OFNaS}$  [ $\text{M} + \text{Na}$ ] $^+$  277.10329, found 277.10287.

#### 4-(2-fluoro-5-phenylpentanoyl)benzonitrile (**8ac**)

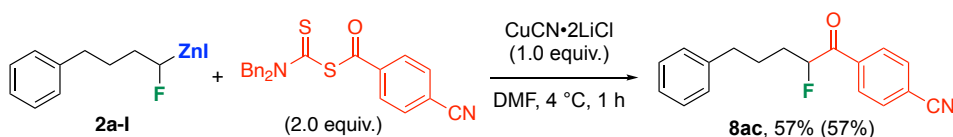

To a test tube equipped with a magnetic stir bar were added **7v** (40.5 mg, 0.20 mmol, 2.0 equiv.) and freshly prepared **2a-I** in DMF (0.40 mL, 0.25 M, 0.10 mmol). After the solution was cooled to 4 °C,  $\text{CuCN}\cdot 2\text{LiCl}$  in THF (0.10 mL,

1.0 M, 0.10 mmol, 1.0 equiv.) was added to the solution. The reaction mixture was further stirred for 1 hour at 4 °C and then poured into a slurry of silica gel in hexane. The slurry was then filtered and washed with hexane/EtOAc. The resulted solution was concentrated under reduced pressure to give crude mixture. The resulted solution was concentrated under reduced pressure to give crude mixture. The NMR yield of **8ac** was determined to be 57% yield respectively by <sup>1</sup>H NMR spectroscopy using 1,1,2,2-tetrachloroethane as an internal standard. The crude mixture was purified by column chromatography using hexane/EtOAc = 20/1 as eluent to give **8ac** with impurities. The obtained mixture was further purified by preparative TLC using hexane/toluene = 20/1 a to give **8ac** as colorless oil (16.0 mg, 57% yield).

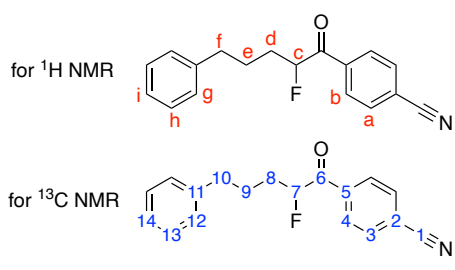

<sup>1</sup>H NMR (500 MHz, CDCl<sub>3</sub>) δ 8.00 (d, 2H, <sup>3</sup>J<sub>H-H</sub> = 7.5 Hz, H<sub>a</sub>), 7.75 (d, 2H, <sup>3</sup>J<sub>H-H</sub> = 7.5 Hz, H<sub>b</sub>), 7.30–7.15 (m, 5H, H<sub>g</sub>–H<sub>i</sub>), 5.46 (dt, 1H, <sup>2</sup>J<sub>H-F</sub> = 49.5 Hz, <sup>3</sup>J<sub>H-H</sub> = 5.8 Hz, H<sub>c</sub>), 2.69 (t, 2H, <sup>3</sup>J<sub>H-H</sub> = 7.5 Hz, H<sub>f</sub>), 2.04–1.82 (m, 4H, H<sub>d</sub> and H<sub>e</sub>); <sup>13</sup>C {<sup>1</sup>H} NMR (125 MHz, CDCl<sub>3</sub>) δ 196.12 (d, <sup>2</sup>J<sub>C-F</sub> = 21.2 Hz, C6), 141.26 (C11), 137.50 (C2), 132.58 (C3), 129.59 (d, <sup>3</sup>J<sub>C-F</sub> = 4.8 Hz, C5), {128.61, 128.50} (C12 and C13), 126.24 (C4), 117.86 (C1), 117.03 (C2), 183.25 (d, <sup>1</sup>J<sub>C-F</sub> = 183.3 Hz, C7), 35.26 (C10), 31.87 (d, <sup>2</sup>J<sub>C-F</sub> = 20.8 Hz, C8), 26.29 (d, <sup>3</sup>J<sub>C-F</sub> = 3.0 Hz, C9); <sup>19</sup>F NMR (470 MHz, CDCl<sub>3</sub>) δ –188.42 (dt, <sup>2</sup>J<sub>H-F</sub> = 49.8 Hz, <sup>3</sup>J<sub>H-F</sub> = 24.7 Hz). HRMS (EI-TOF) m/z calcd. for C<sub>18</sub>H<sub>16</sub>ONF [M]<sup>+</sup> 281.12104, found 281.12068.

#### (Z)-4-fluoro-1-phenyldocos-13-en-5-one (**8ad**)

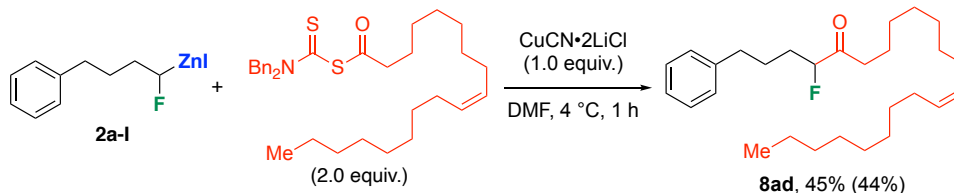

To a test tube equipped with a magnetic stir bar were added **7w** (108 mg, 0.20 mmol, 2.0 equiv.) and freshly prepared **2a-I** in DMF (0.40 mL, 0.25 M, 0.10 mmol). After the solution was cooled to 4 °C, CuCN·2LiCl in THF (0.10 mL, 1.0 M, 0.10 mmol, 1.0 equiv.) was added to the solution. The reaction mixture was further stirred for 1 hour at 4 °C and then poured into a slurry of silica gel in hexane. The slurry was then filtered and washed with hexane/EtOAc. The resulted solution was concentrated under reduced pressure to give crude mixture. The resulted solution was concentrated under reduced pressure to give crude mixture. The NMR yield of **8ad** was determined to be 45% yield respectively by <sup>1</sup>H NMR spectroscopy using 1,1,2,2-tetrachloroethane as an internal standard. The crude mixture was purified by column chromatography using hexane/EtOAc = 40/1 as eluent to give **8ad** with impurities. The obtained mixture was further purified by preparative TLC using hexane/toluene = 20/1 a to give **8ad** as colorless oil (18.3 mg, 44% yield).

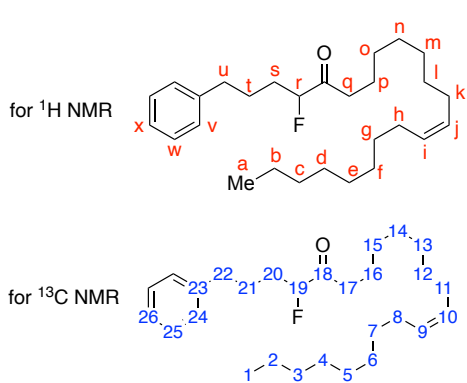

$^1\text{H}$  NMR (400 MHz,  $\text{CDCl}_3$ )  $\delta$  7.29–7.15 (m, 5H,  $\text{H}_v\text{--H}_x$ ), 5.35–5.29 (m, 2H,  $\text{H}_i$  and  $\text{H}_j$ ), 4.71–4.65 (m, 1H,  $\text{H}_r$ ), 2.64 (t, 2H,  $^3J_{\text{H--H}} = 7.2$  Hz,  $\text{H}_u$ ), 2.60–2.48 (m, 2H,  $\text{H}_q$ ), 2.01–1.98 (m, 4H,  $\text{H}_h$  and  $\text{H}_k$ ), 1.81–1.75 (m, 4H,  $\text{H}_s$  and  $\text{H}_t$ ), 1.32–1.20 (m, 22H,  $\text{H}_b\text{--H}_f$  and  $\text{H}_l\text{--H}_p$ ), 0.87 (t, 3H,  $^3J_{\text{H--H}} = 7.2$  Hz,  $\text{H}_a$ );  $^{13}\text{C}\{^1\text{H}\}$  NMR (100 MHz,  $\text{CDCl}_3$ )  $\delta$  210.41 (d,  $^2J_{\text{C--F}} = 24.0$  Hz, C18), 141.62 (C23), {130.16, 129.89} (C9 and C10), {128.55, 128.52} (C24 and C25), 126.13 (C26), 96.00 (d,  $^1J_{\text{C--F}} = 183.1$  Hz, C19), {38.21, 35.49, 32.05} (C8, C11, and C22), 31.70 (d,  $^2J_{\text{C--F}} = 21.1$  Hz, C20), {29.92, 29.84, 29.78, 29.48, 29.43, 29.27, 29.25, 22.84, 22.79} (C2, C3, C4, C5, C6, C7, C12, C13, C14, C15, C16, two carbons overlapped), 27.34 (d,  $^3J_{\text{C--F}} = 5.7$  Hz, C17), 26.44 (d,  $^3J_{\text{C--F}} = 2.9$  Hz, C21), 14.27 (C1);  $^{19}\text{F}$  NMR (367 MHz,  $\text{CDCl}_3$ )  $\delta$  -191.52–-191.88 (m). HRMS (ESI-TOF)  $m/z$  calcd. for.  $\text{C}_{28}\text{H}_{45}\text{OFNa}$  [ $\text{M} + \text{Na}$ ] $^+$  439.33467, found 439.33400.

*N*-(3,5-bis(trifluoromethyl)phenyl)-2-fluoro-5-phenylpentanethioamide (**8ae**)

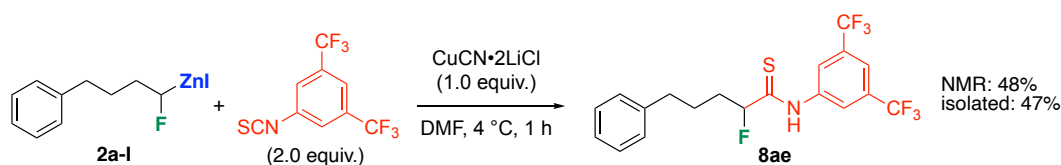

To a test tube equipped with a magnetic stir bar were added freshly prepared **2a-I** in DMF (0.40 mL, 0.25 M, 0.10 mmol). After the solution was cooled to 4 °C, 1-isothiocyanato-3,5-bis(trifluoromethyl)benzene (38.0  $\mu\text{L}$ , 0.20 mmol, 2.0 equiv.) and  $\text{CuCN}\cdot 2\text{LiCl}$  in THF (0.10 mL, 1.0 M, 0.10 mmol) were subsequently added to the solution. The reaction mixture was further stirred for 1 hour at 4 °C and then quenched with  $\text{H}_2\text{O}$ . The solution was extracted with hexane/EtOAc and dried over  $\text{Na}_2\text{SO}_4$ . The resulted solution was concentrated under reduced pressure to give crude mixture. The NMR yield of **8ae** was determined to be 48% yield respectively by  $^1\text{H}$  NMR spectroscopy using 1,1,2,2-tetrachloroethane as an internal standard. The crude mixture was purified by preparative TLC using hexane as eluent to give mixture of **8ae** as yellow oil (19.8 mg, 47% yield).

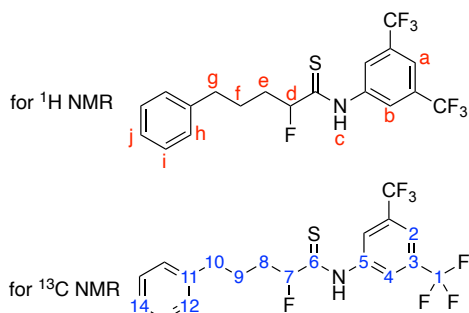

$^1\text{H}$  NMR (400 MHz,  $\text{CDCl}_3$ )  $\delta$  9.49 (d, 1H,  $^4J_{\text{H--F}} = 11.6$  Hz,  $\text{H}_c$ ), 8.37 (s, 2H,  $\text{H}_b$ ), 7.78 (s, 1H,  $\text{H}_a$ ), 7.31–7.17 (m, 5H,  $\text{H}_h\text{--H}_j$ ), 5.34 (ddd, 1H,  $^2J_{\text{H--F}} = 51.0$  Hz,  $^3J_{\text{H--H}} = 7.6$  Hz,  $^3J_{\text{H--H}} = 3.4$  Hz,  $\text{H}_d$ ), 2.76–2.63 {2.72 (dt, 1H,  $^2J_{\text{H--H}} = 10.0$  Hz,  $^3J_{\text{H--H}} = 7.0$  Hz,  $\text{H}_g$ ), 2.66 (dt, 1H,  $^2J_{\text{H--H}} = 10.0$  Hz,  $^3J_{\text{H--H}} = 7.0$  Hz,  $\text{H}_g$ )}, 2.42–2.23 (m, 1H,  $\text{H}_e$ ), 2.16–2.00 (m, 1H,  $\text{H}_e$ ), 1.91–1.83 (m, 2H,  $\text{H}_f$ );  $^{13}\text{C}\{^1\text{H}\}$  NMR (100 MHz,  $\text{CDCl}_3$ )  $\delta$  198.85 (d,  $^3J_{\text{C--F}} = 11.5$  Hz, C6), 141.49 (C11), 138.79 (C5), 132.64 (q,  $^2J_{\text{C--F}} = 34.5$  Hz, C3), 128.62 (C12 or C13), 128.65 (C12 or C13), 126.23 (C14), 123.15 (m, C4), 122.97 (q,  $^1J_{\text{C--F}} = 271.2$  Hz, C1), 120.59 (m, C1), 98.66 (d,  $^1J_{\text{C--F}} = 192.6$  Hz, C7), 35.44 (C10), 35.34 (d,  $^3J_{\text{C--F}} = 20.1$  Hz, C8), 26.30 (C9);  $^{19}\text{F}$  NMR (367 MHz,  $\text{CDCl}_3$ )  $\delta$  -61.35 (s), -173.74–-174.06 (m). HRMS (ESI-TOF)  $m/z$  calcd. for.  $\text{C}_{19}\text{H}_{15}\text{NF}_7\text{S}$  [ $\text{M} - \text{H}$ ] $^+$  422.08189, found 422.08212.

*N*-(4-(dimethylamino)-3-fluorobutyl)-4-methyl-*N*-phenylbenzenesulfonamide (**8af**)

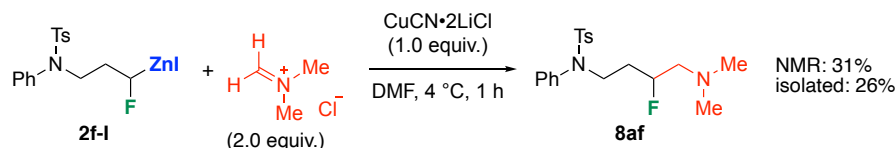

To a test tube equipped with a magnetic stir bar were added freshly prepared **2f-I** in DMF (0.40 mL, 0.25 M, 0.10 mmol). After the solution was cooled to 4 °C, Eschenmoser's salt (18.7 mg, 0.20 mmol, 2.0 equiv.) and CuCN·2LiCl in THF (0.10 mL, 1.0 M, 0.10 mmol) were subsequently added to the solution. The reaction mixture was further stirred for 1 hour at 4 °C and then poured into a slurry of silica gel in hexane. The slurry was then filtered and washed with hexane/EtOAc. The resulted solution was concentrated under reduced pressure to give crude mixture. The NMR yield of **8af** was determined to be 31% yield respectively by <sup>1</sup>H NMR spectroscopy using 1,1,2,2-tetrachloroethane as an internal standard. The crude mixture was purified by preparative TLC using hexane/EtOAc = 20/1 as eluent to give mixture of **8af** as brown oil (9.6 mg, 26% yield).

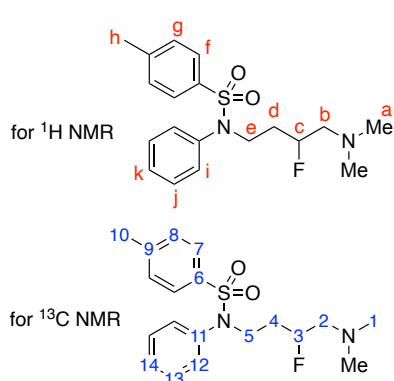

<sup>1</sup>H NMR (400 MHz, CDCl<sub>3</sub>) δ 7.44 (d, 2H, <sup>3</sup>J<sub>H-H</sub> = 8.0 Hz, H<sub>f</sub>), 7.33–7.28 (m, 3H, H<sub>j</sub> and H<sub>k</sub>), 7.21 (d, 2H, <sup>3</sup>J<sub>H-H</sub> = 8.0 Hz, H<sub>g</sub>), 7.04–7.02 (m, 2H, H<sub>i</sub>), 4.79–4.61 (m, 1H, H<sub>c</sub>), 3.74–3.59 {3.70 (dt, 1H, <sup>2</sup>J<sub>H-H</sub> = 13.6 Hz, <sup>3</sup>J<sub>H-H</sub> = 7.2 Hz, H<sub>e</sub>), 3.64 (dt, 1H, <sup>2</sup>J<sub>H-H</sub> = 13.6 Hz, <sup>3</sup>J<sub>H-H</sub> = 7.2 Hz, H<sub>e</sub>)}, 2.54 (ddd, 1H, <sup>2</sup>J<sub>H-H</sub> = 13.8 Hz, <sup>3</sup>J<sub>H-F</sub> = 19.2 Hz, <sup>3</sup>J<sub>H-H</sub> = 8.0 Hz, H<sub>b</sub>), 2.41 (s, 3H, H<sub>h</sub>), 2.32 (ddd, 1H, <sup>2</sup>J<sub>H-H</sub> = 13.8 Hz, <sup>3</sup>J<sub>H-F</sub> = 30.0 Hz, <sup>3</sup>J<sub>H-H</sub> = 3.6 Hz, H<sub>b</sub>), 2.24 (s, 6H, H<sub>a</sub>), 1.75–1.60 (m, 2H, H<sub>d</sub>); <sup>13</sup>C {<sup>1</sup>H} NMR (100 MHz, CDCl<sub>3</sub>) δ 143.67 (C11), 139.22 (C6), 134.92 (C10), {129.57, 129.25, 128.79, 128.16, 127.89} (C7, C8, C12, C13, and C14), 89.87 (d, <sup>1</sup>J<sub>C-F</sub> = 172.6 Hz, C3), 63.12 (d, <sup>2</sup>J<sub>C-F</sub> = 21.0 Hz, C2),

47.08 (d, <sup>3</sup>J<sub>C-F</sub> = 4.7 Hz, C5), 46.14 (C1), 32.68 (d, <sup>2</sup>J<sub>C-F</sub> = 21.0 Hz, C4), 21.71 (C10); <sup>19</sup>F NMR (367 MHz, CDCl<sub>3</sub>) δ -182.81–-183.19 (m). HRMS (ESI-TOF) m/z calcd. for. C<sub>19</sub>H<sub>26</sub>O<sub>2</sub>N<sub>2</sub>FS [M + H]<sup>+</sup> 365.16935, found 365.16898.

#### *N*-(3-fluoropropyl-3-d)-4-methyl-*N*-phenylbenzenesulfonamide (**8ag**)

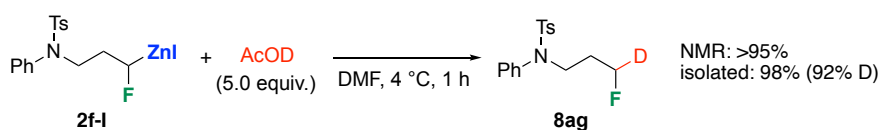

To a test tube equipped with a magnetic stir bar were added freshly prepared **2f-I** in DMF (0.40 mL, 0.25 M, 0.10 mmol). Acetic acid-*d*<sub>1</sub> (28.8 μL, 0.50 mmol, 5.0 equiv.) was subsequently added to the solution. The reaction mixture was further stirred for 1 hour at room temperature and then poured into a slurry of silica gel in hexane. The slurry was then filtered and washed with hexane/EtOAc. The resulted solution was concentrated under reduced pressure to give crude mixture. The NMR yield of **8ag** was determined to be >95% yield respectively by <sup>1</sup>H NMR spectroscopy using 1,1,2,2-tetrachloroethane as an internal standard. The crude mixture was purified by preparative TLC using /EtOAc = 8/1 as eluent to give mixture of **8ag** as white solid (30.3 mg, 98% yield, 92% deuteration). The ratio of deuteration was determined by <sup>19</sup>F NMR spectroscopy (for D: -220.35–-220.65, for H: -219.68–-220.08)

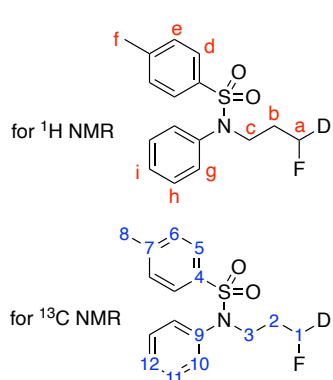

$^1\text{H}$  NMR (400 MHz,  $\text{CDCl}_3$ )  $\delta$  7.45 (d, 2H,  $^3J_{\text{H-H}} = 8.0$  Hz,  $\text{H}_d$ ), 7.32–7.22 (m, 3H,  $\text{H}_h$  and  $\text{H}_i$ ), 7.23 (d, 2H,  $^3J_{\text{H-H}} = 8.0$  Hz,  $\text{H}_e$ ), 7.06–7.02 (m, 2H,  $\text{H}_g$ ), 4.46 (dt, 1H,  $^2J_{\text{H-F}} = 48.0$  Hz,  $^3J_{\text{H-H}} = 6.4$  Hz,  $\text{H}_c$ ), 3.66 (t, 2H,  $^3J_{\text{H-H}} = 6.8$  Hz,  $\text{H}_b$ ), 2.40 (s, 3H,  $\text{H}_f$ ), 1.83 (ddt, 2H,  $^3J_{\text{H-F}} = 26.0$  Hz,  $^3J_{\text{H-H}} = 6.4$  Hz,  $^3J_{\text{H-H}} = 6.4$  Hz,  $\text{H}_a$ );  $^{13}\text{C}$  NMR (100 MHz,  $\text{CDCl}_3$ )  $\delta$  143.65 (C9), 139.23 (C4), 135.05 (C7), {129.54, 129.34, 128.79, 128.14, 127.86} (C5, C6, C10, C11, and C12), 80.99 (dt,  $^1J_{\text{C-F}} = 190.8$  Hz,  $^1J_{\text{C-D}} = 23.0$  Hz, C1), 47.10 (d,  $^3J_{\text{C-F}} = 5.8$  Hz, C3), 29.58 (d,  $^2J_{\text{C-F}} = 21.0$  Hz, C2), 21.65 (C8);  $^{19}\text{F}$  NMR (367 MHz,  $\text{CDCl}_3$ )  $\delta$  -220.35–-220.65 (m). HRMS (ESI-TOF)  $m/z$  calcd. for  $\text{C}_{16}\text{H}_{17}\text{DO}_2\text{NFSNa}$  [ $\text{M} + \text{H}$ ] $^+$  331.09973, found 331.09919.

## 8. References in Supporting Information

- <sup>S1</sup> Jiang, X.; Sakthivel, S.; Kulbitski, K.; Nisnevich, G.; Gandelman, M. Efficient synthesis of secondary alkyl fluorides via Suzuki cross-coupling reaction of 1-halo-1-fluoroalkanes. *J. Am. Chem. Soc.* **2014**, *136*, 9548–9551.
- <sup>S2</sup> Wu, B.-B.; Xu, J.; Gao, Q.; Bian, K.-J.; Liu, G.-K.; Wang, X.-S. A general and efficient solution to monofluoroalkylation: Divergent synthesis of aliphatic monofluorides with modular synthetic scaffolds. *Angew. Chem. Int. Ed.* **2022**, *61*, e202208938.
- <sup>S3</sup> Jiang, X.; Gandelman, M. Enantioselective Suzuki cross-coupling of unactivated 1-fluoro-1-haloalkanes: Synthesis of chiral  $\beta$ -,  $\gamma$ -,  $\delta$ -, and  $\epsilon$ -fluoroalkanes. *J. Am. Chem. Soc.* **2015**, *137*, 2542–2547.
- <sup>S4</sup> Huang, W.; Wan, X.; Shen, Q. Cobalt-catalyzed asymmetric cross-coupling reaction of fluorinated secondary benzyl bromides with lithium aryl boronates/ZnBr<sub>2</sub>. *Org. Lett.* **2020**, *22*, 4327–4332.

## 9. NMR and Mass Spectra of the Literature New Compounds

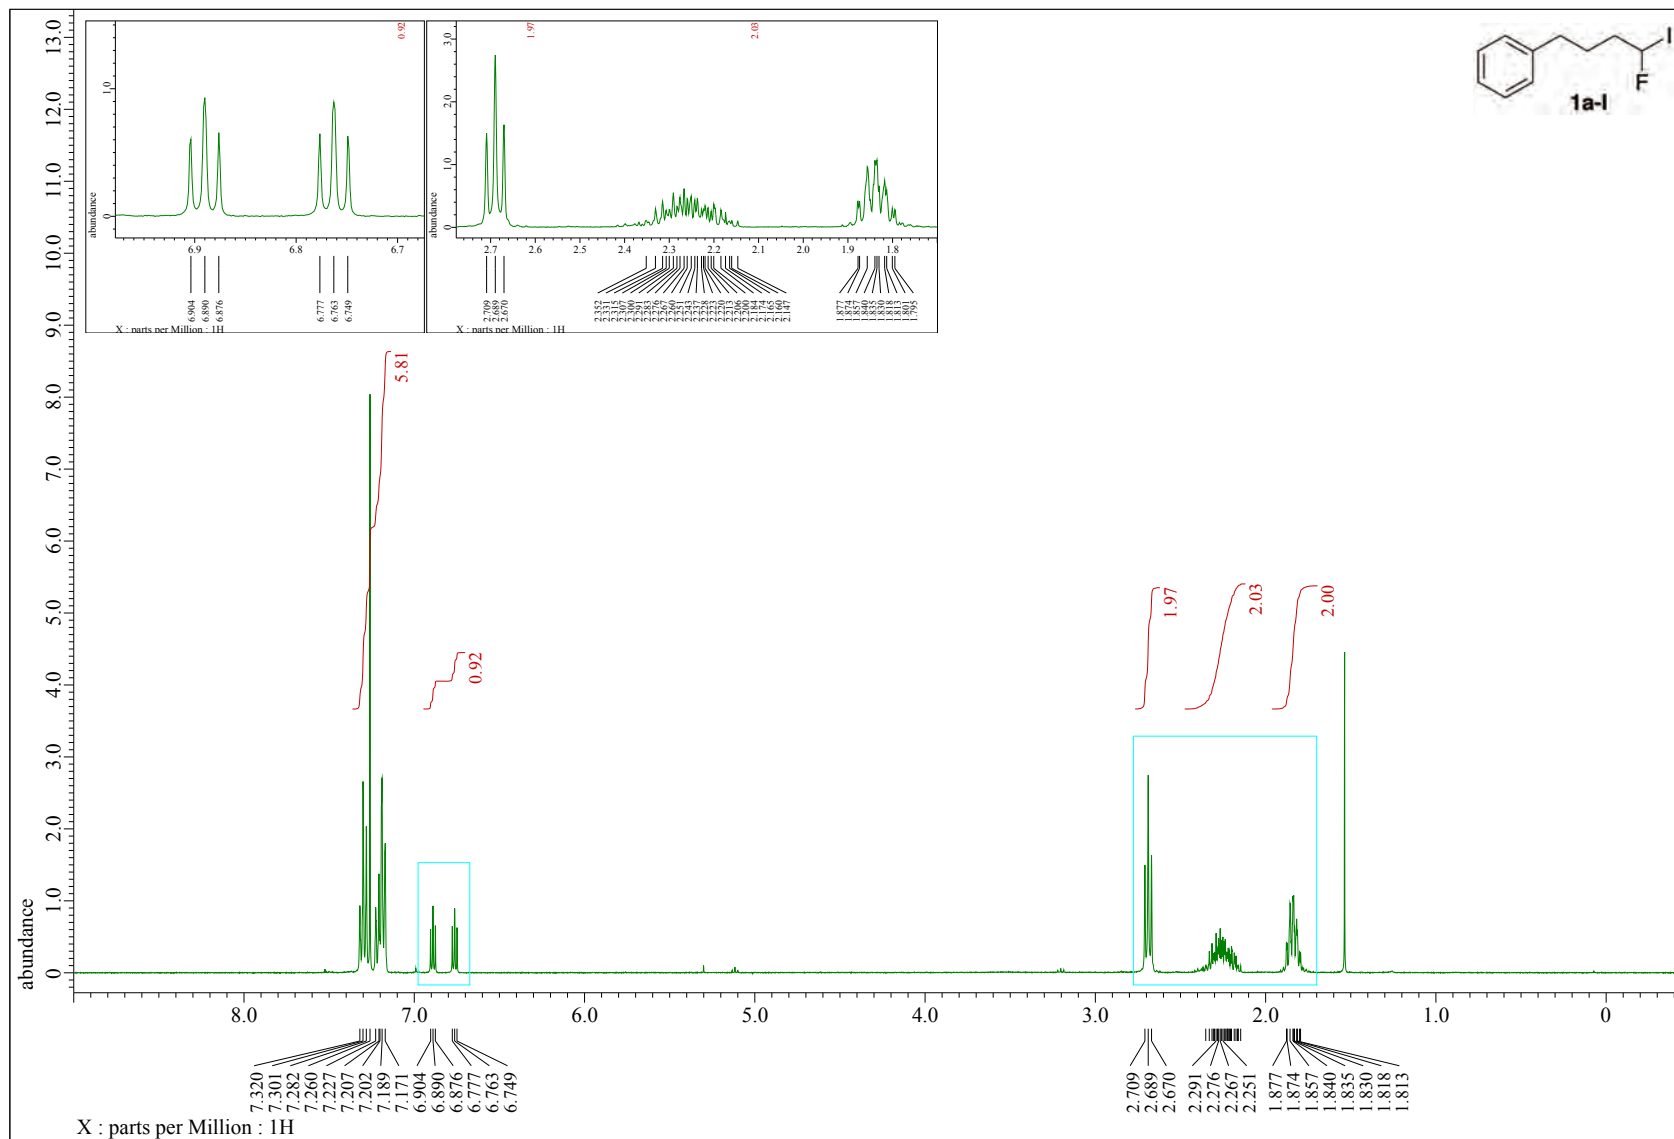

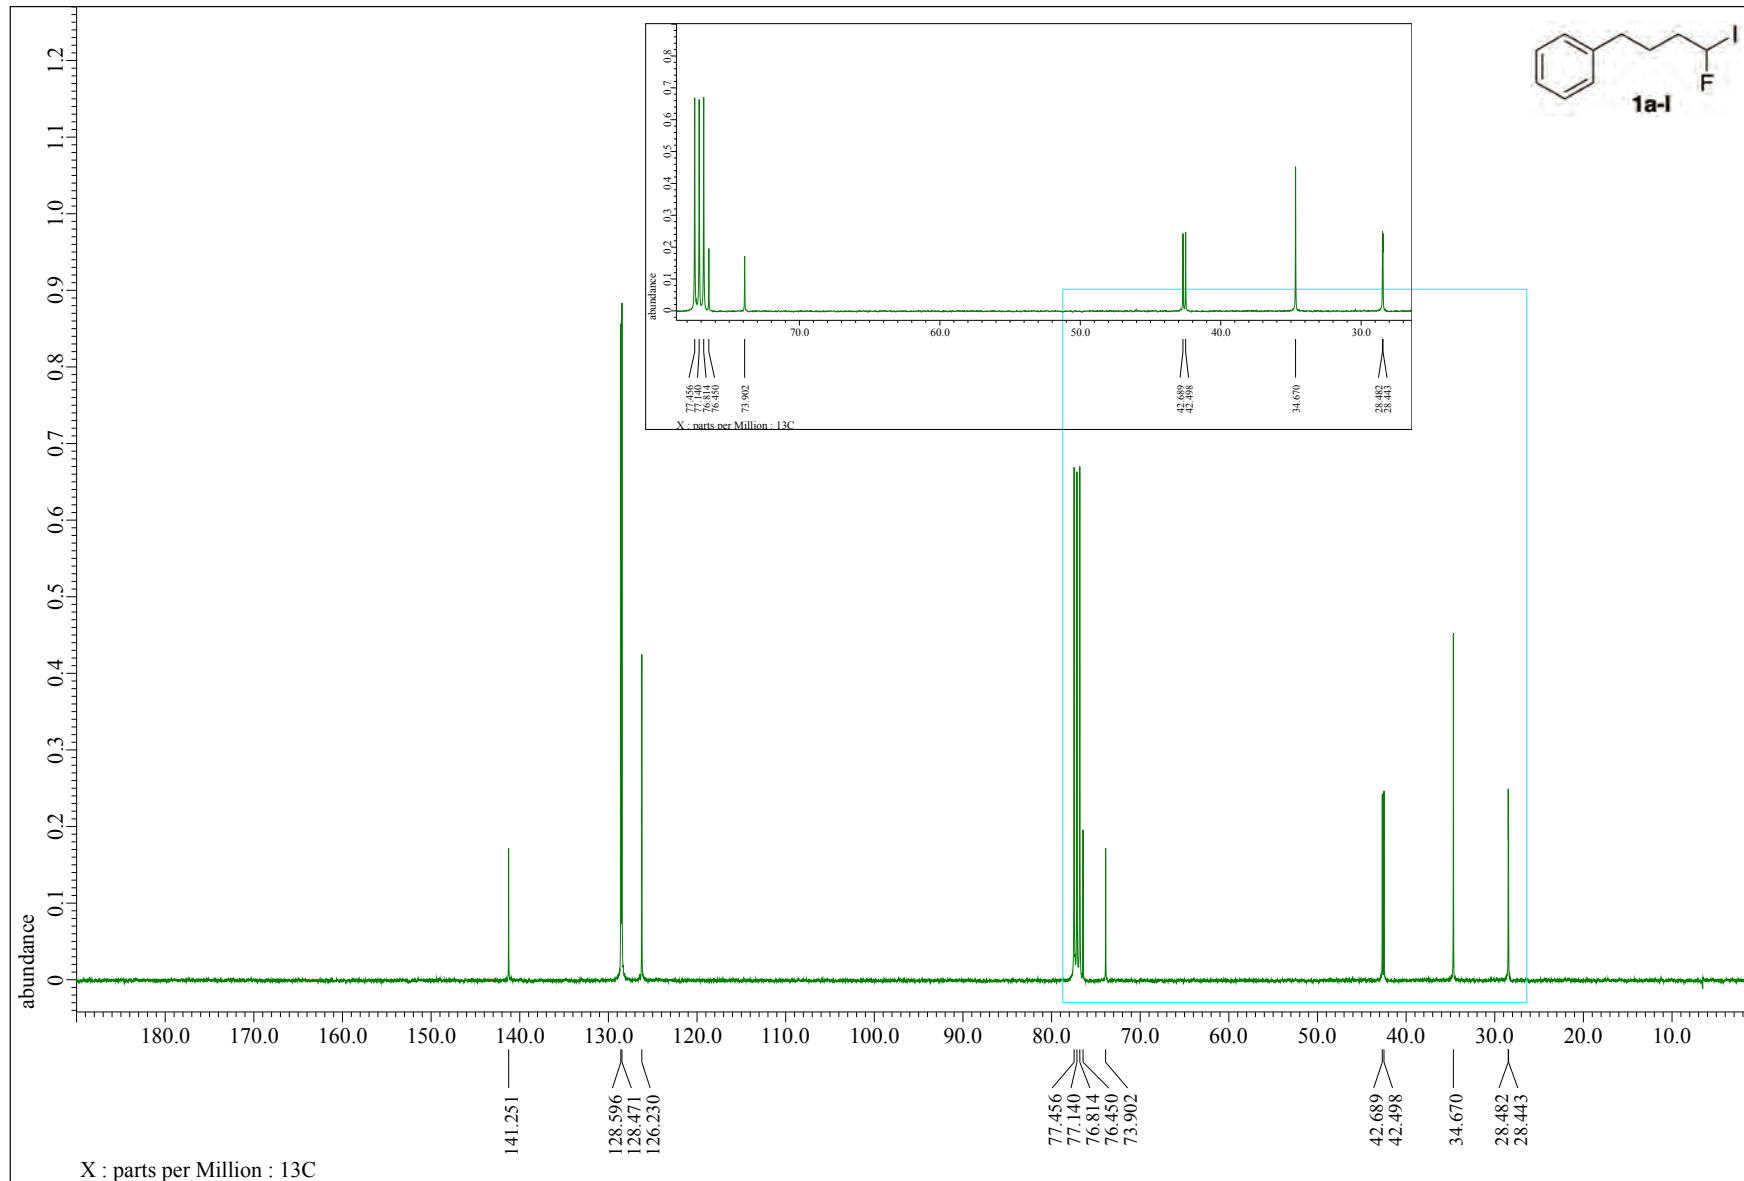



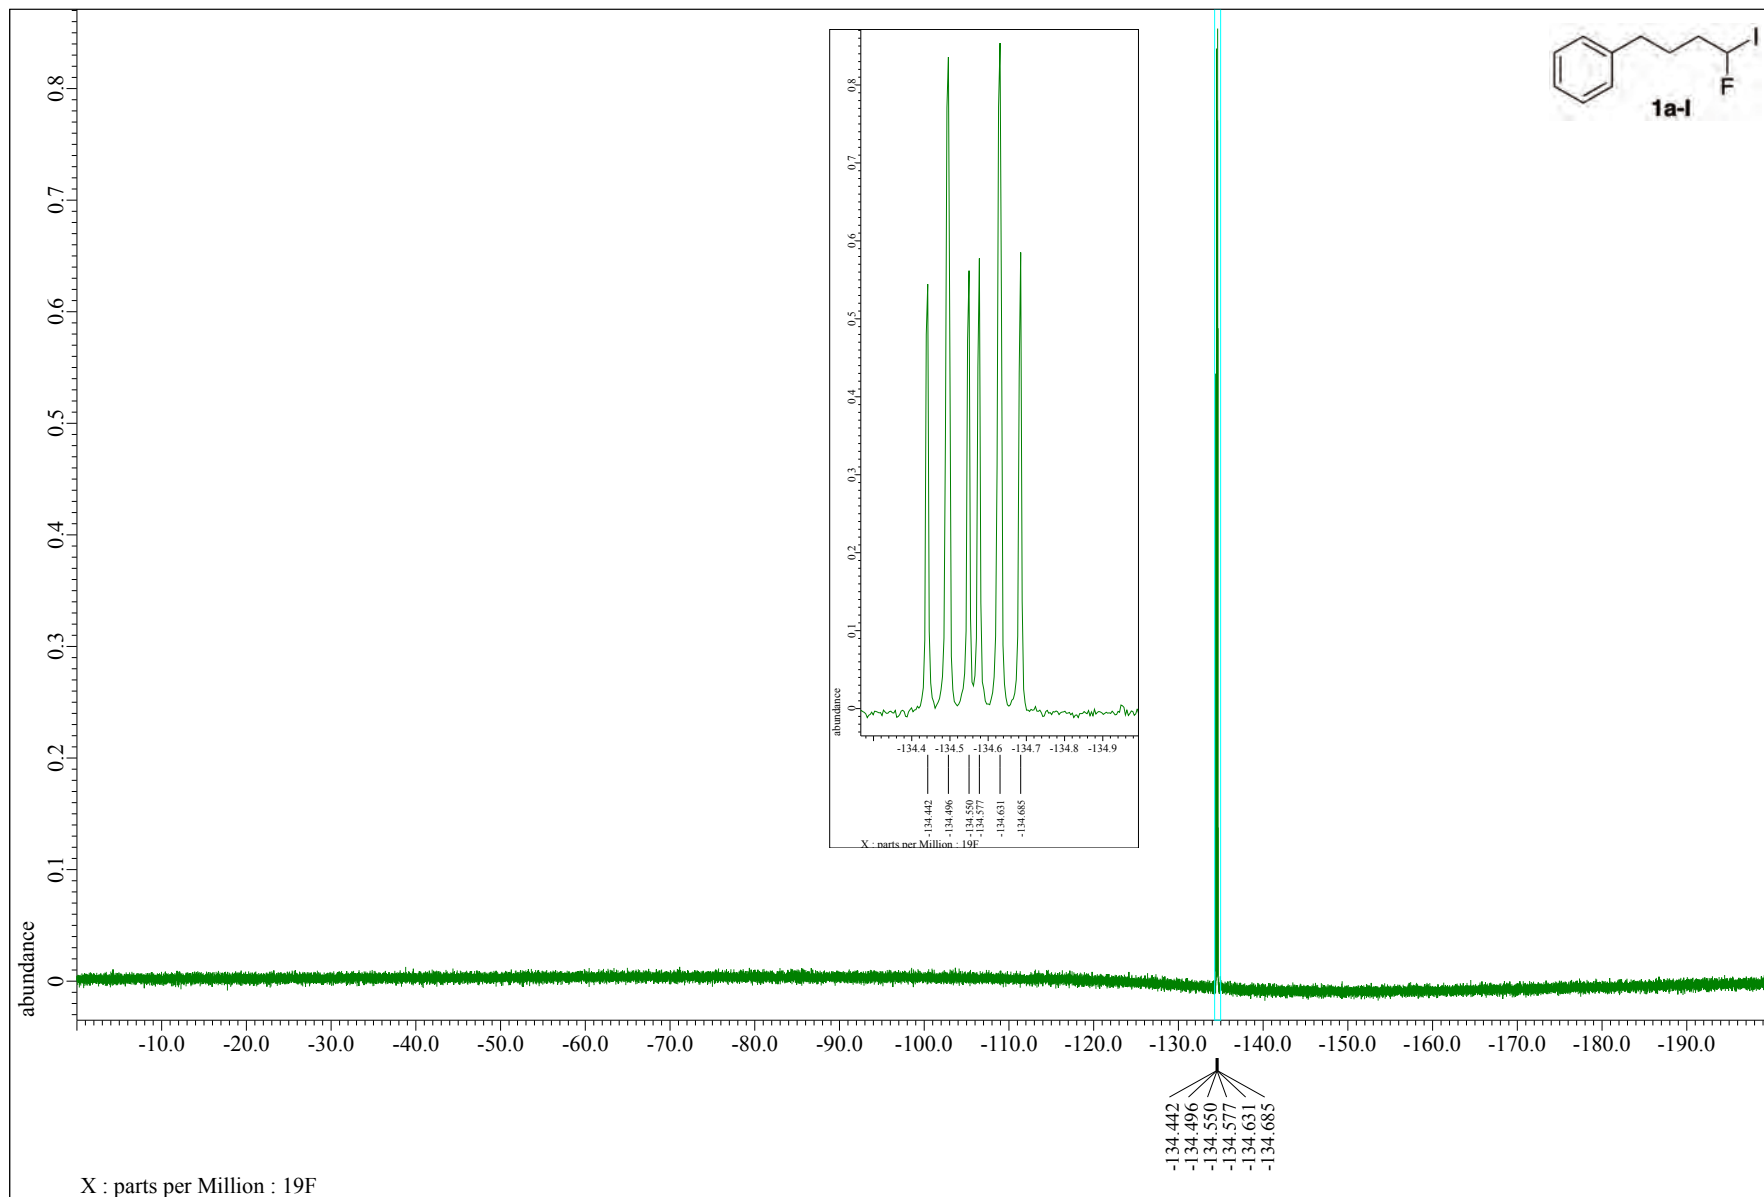

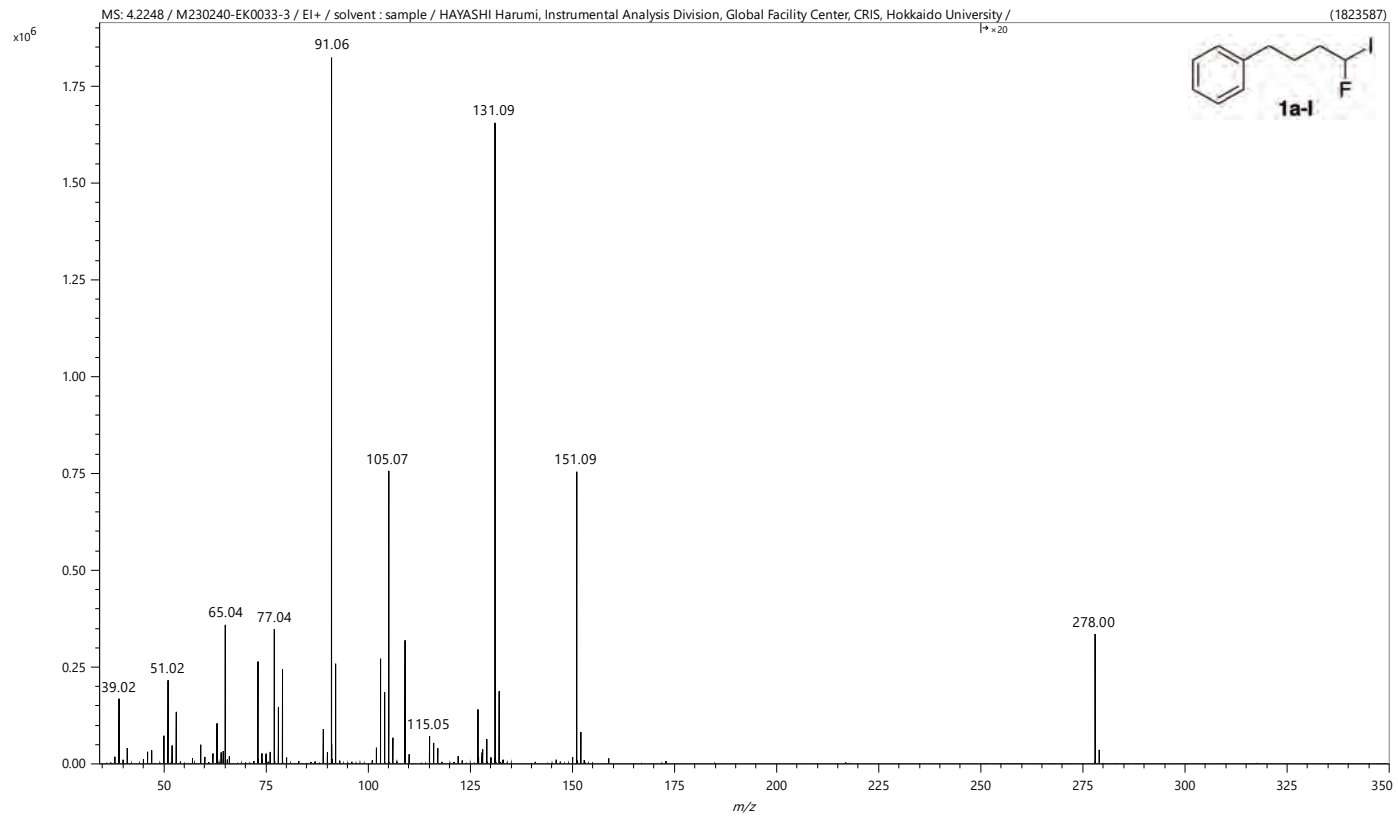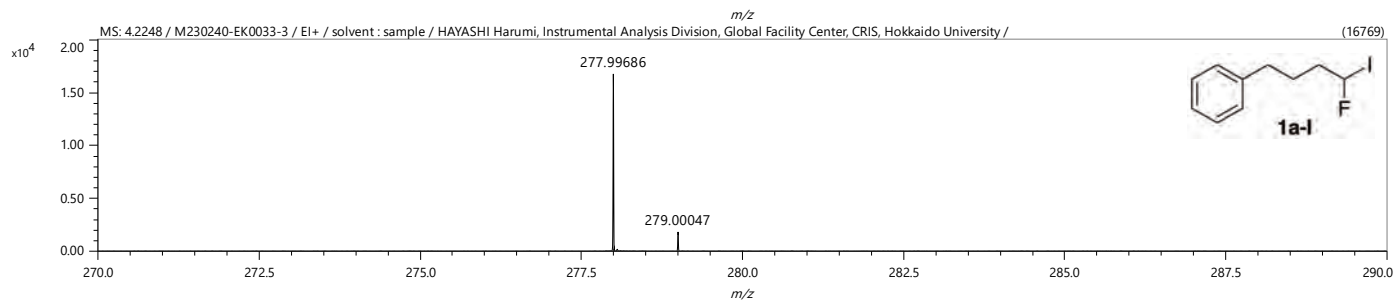

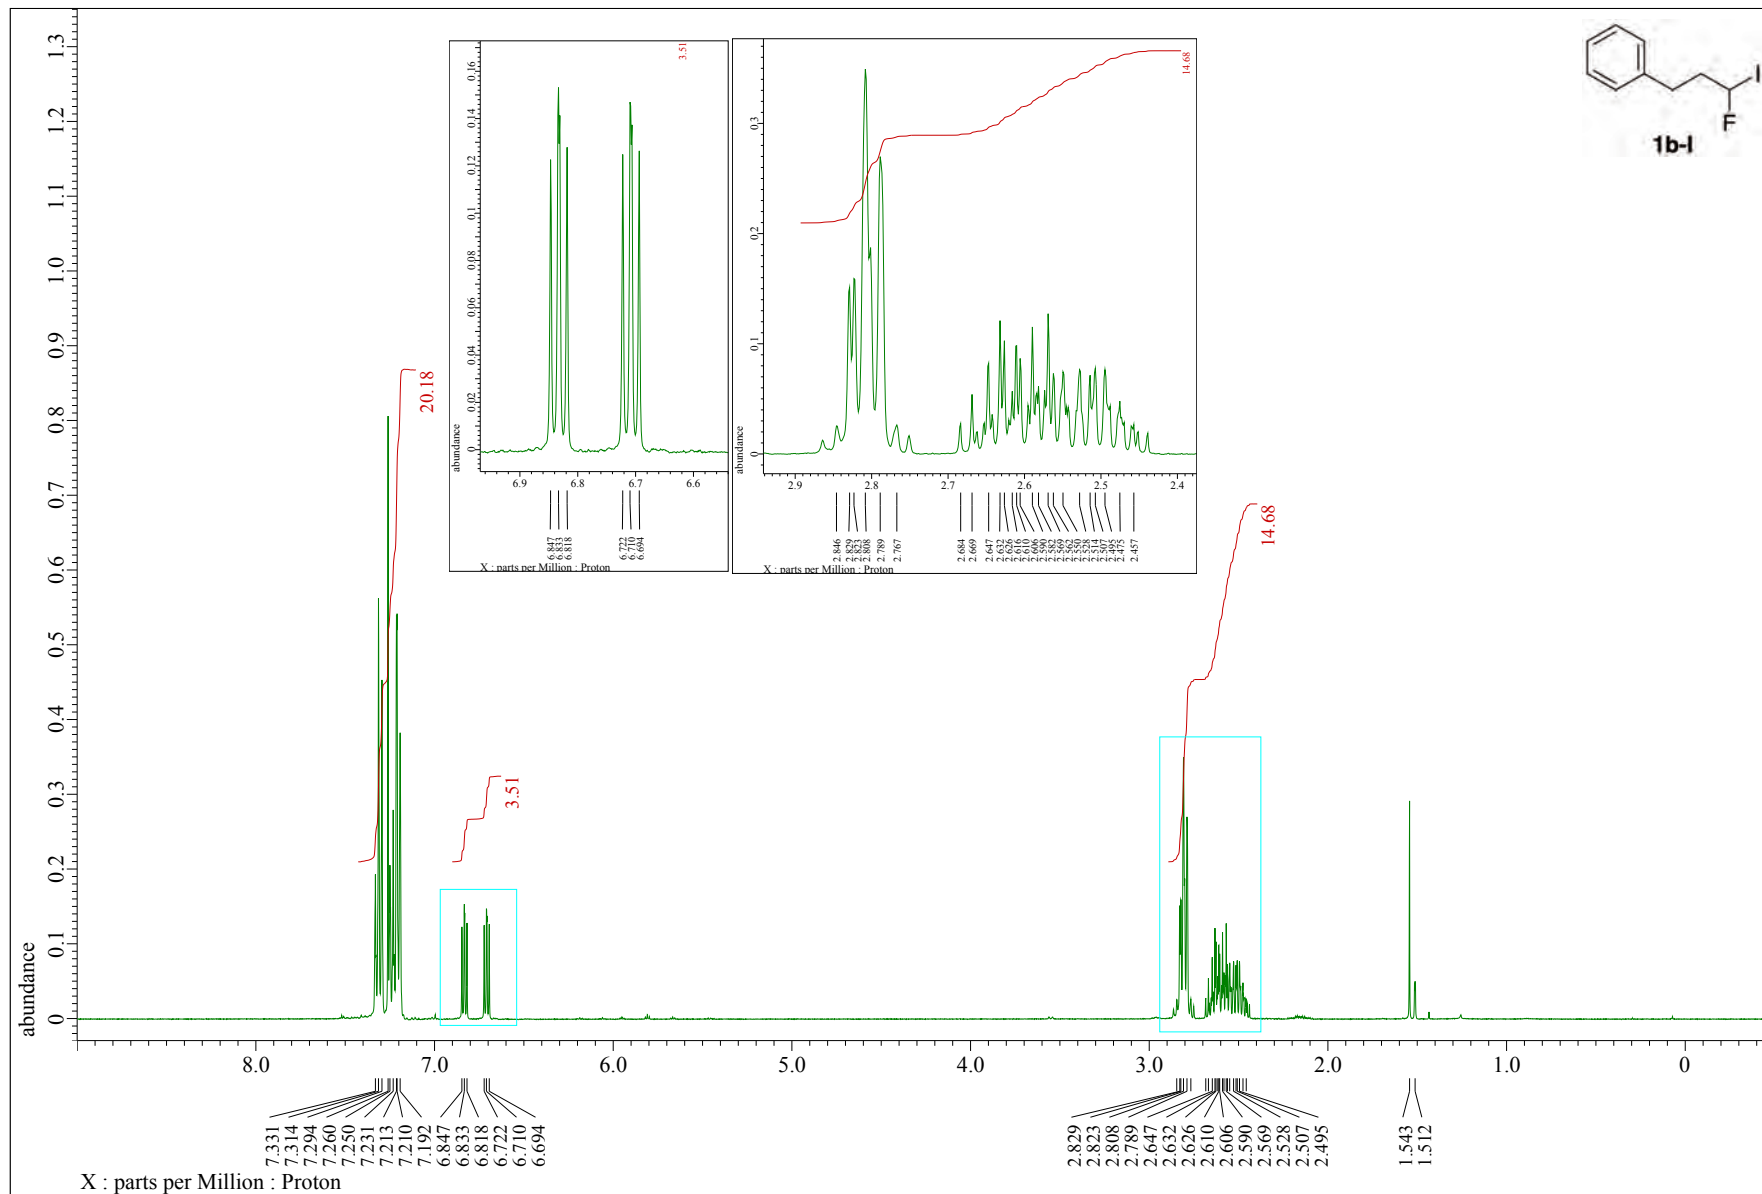

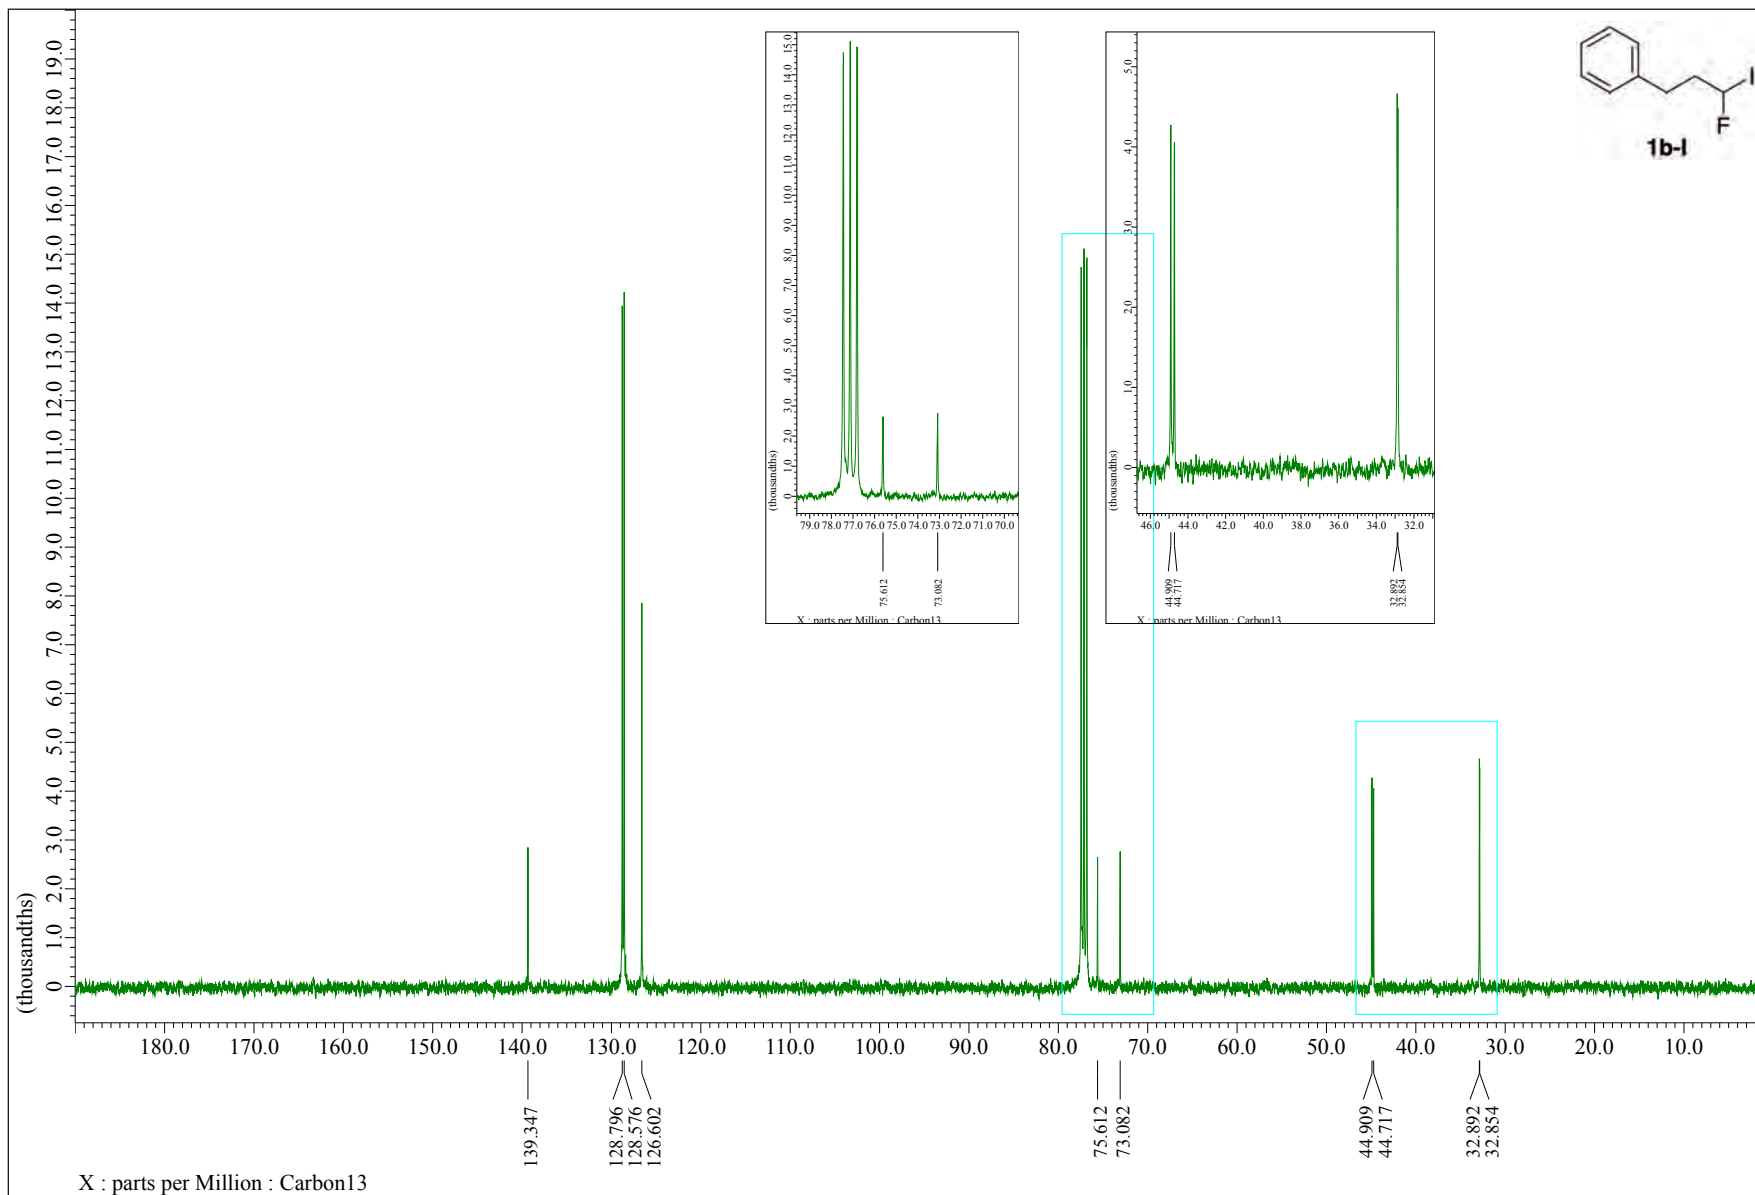

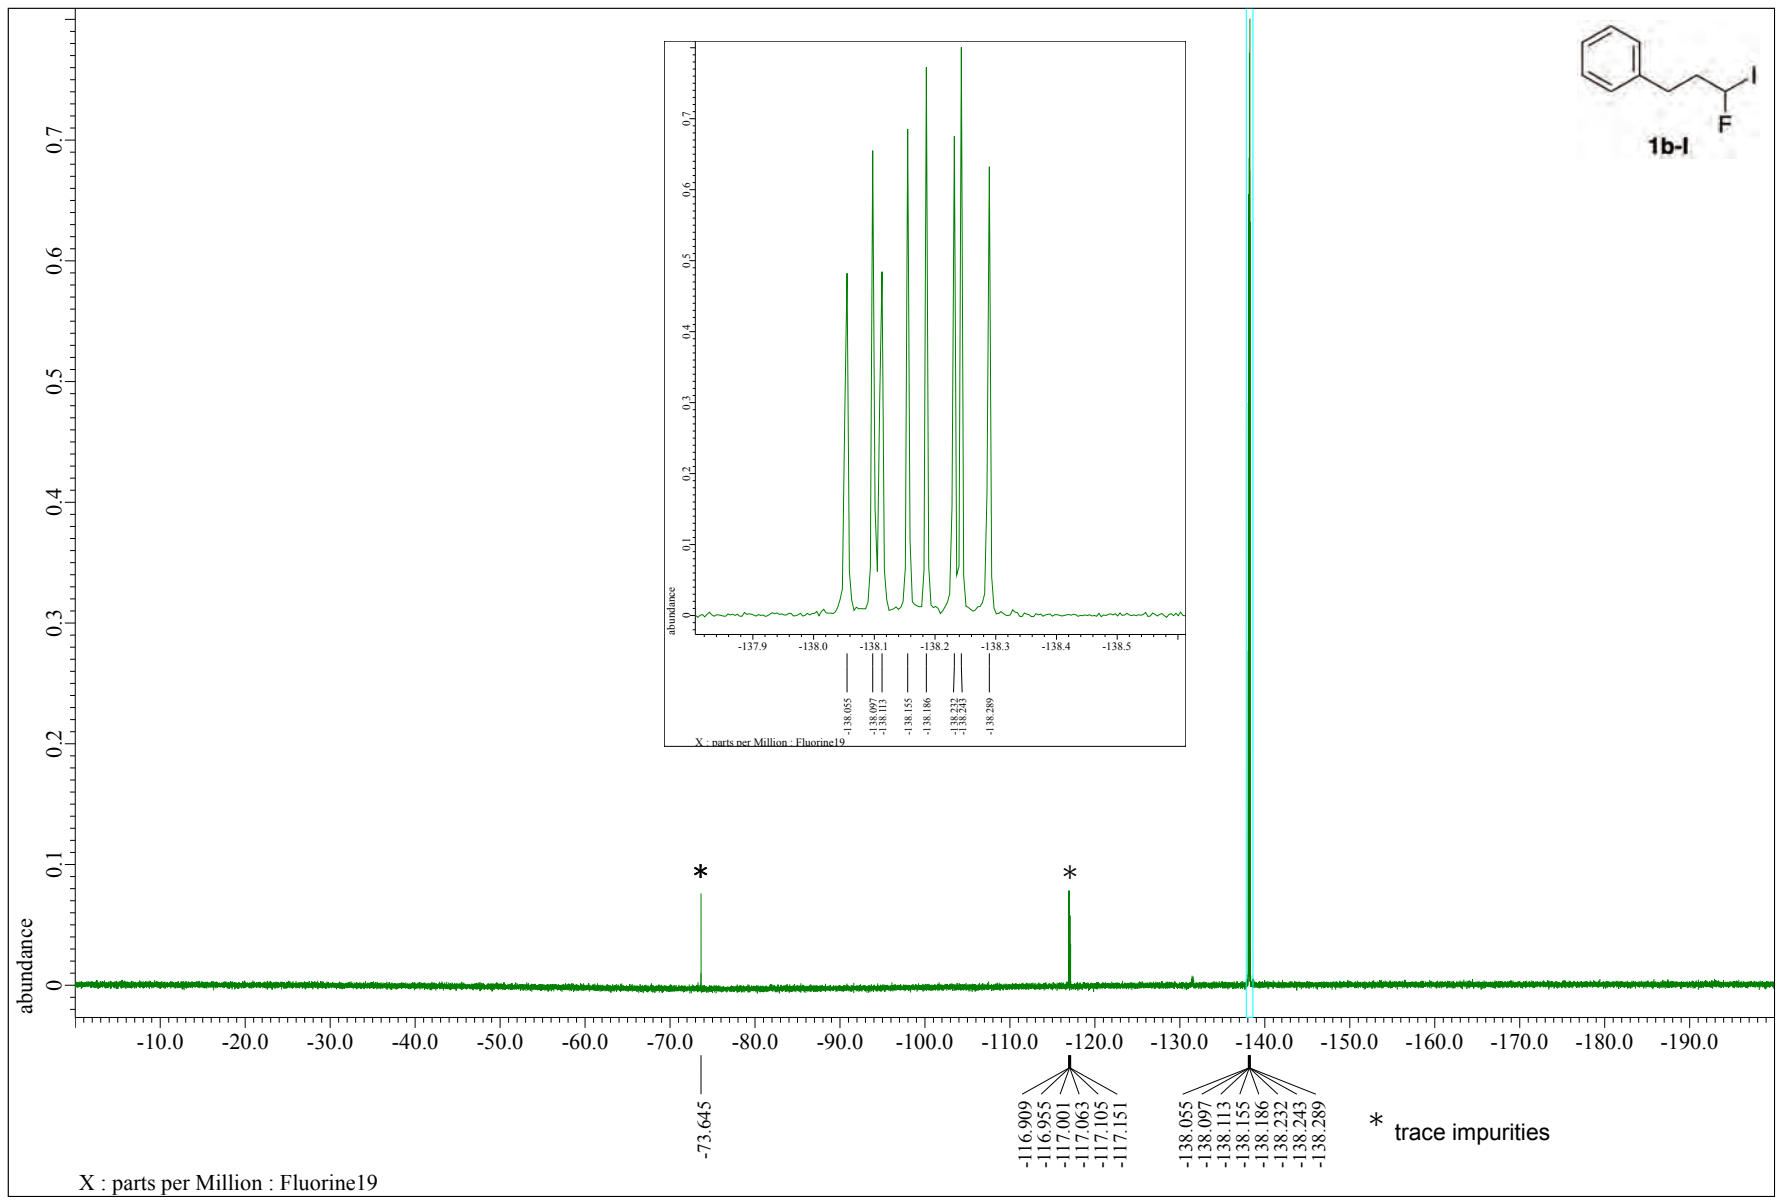

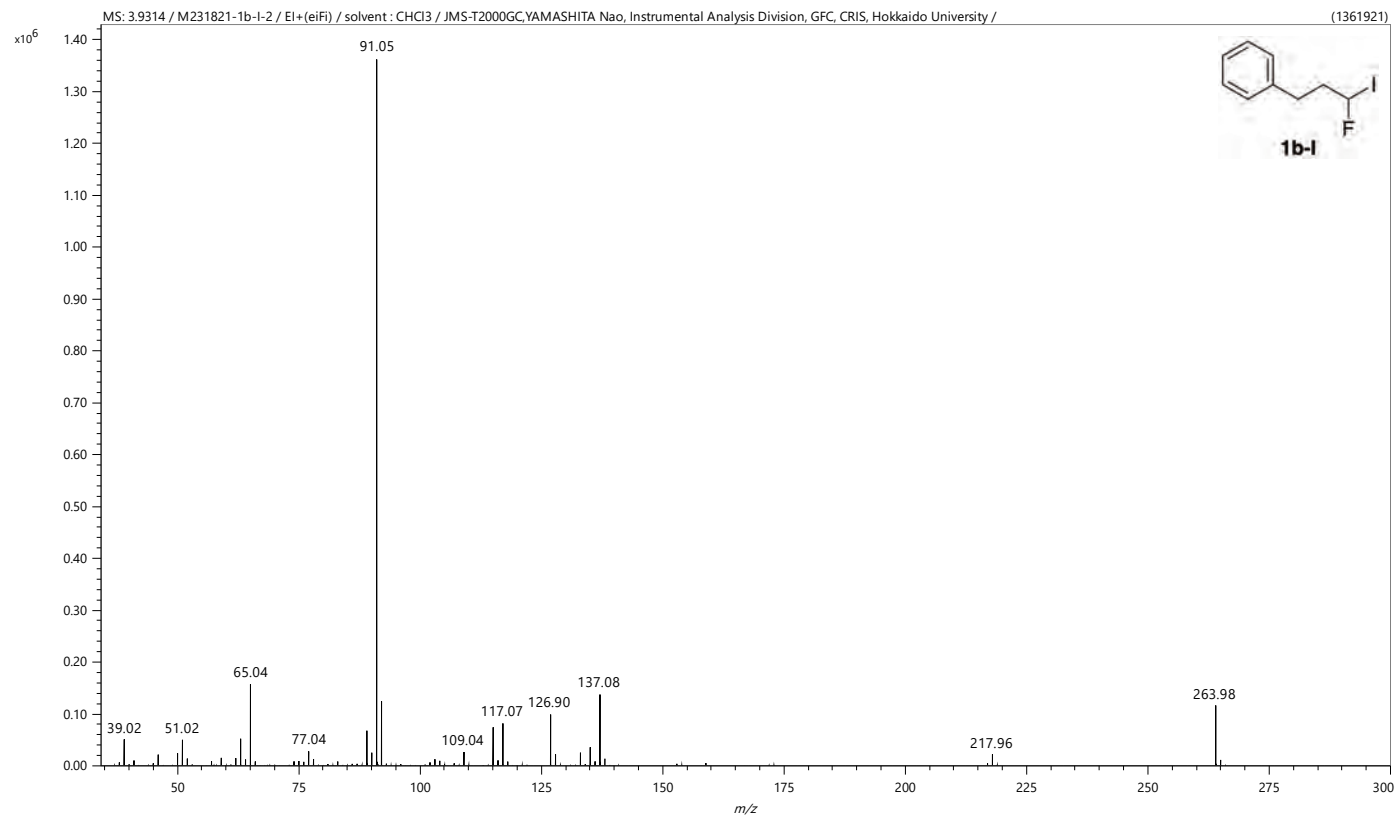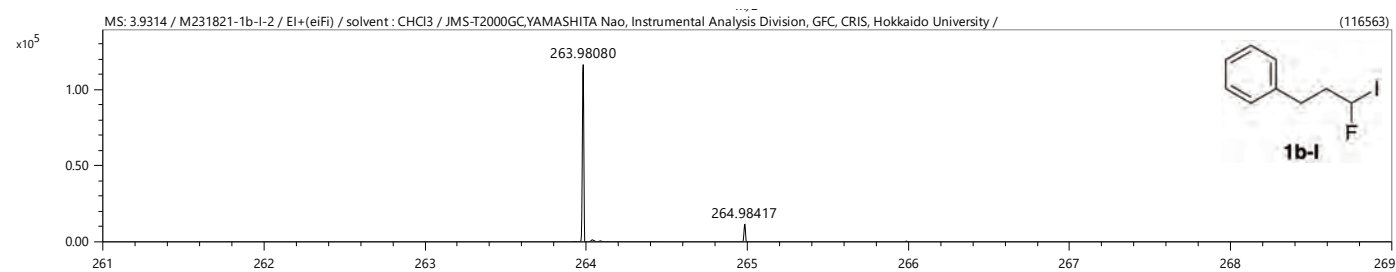

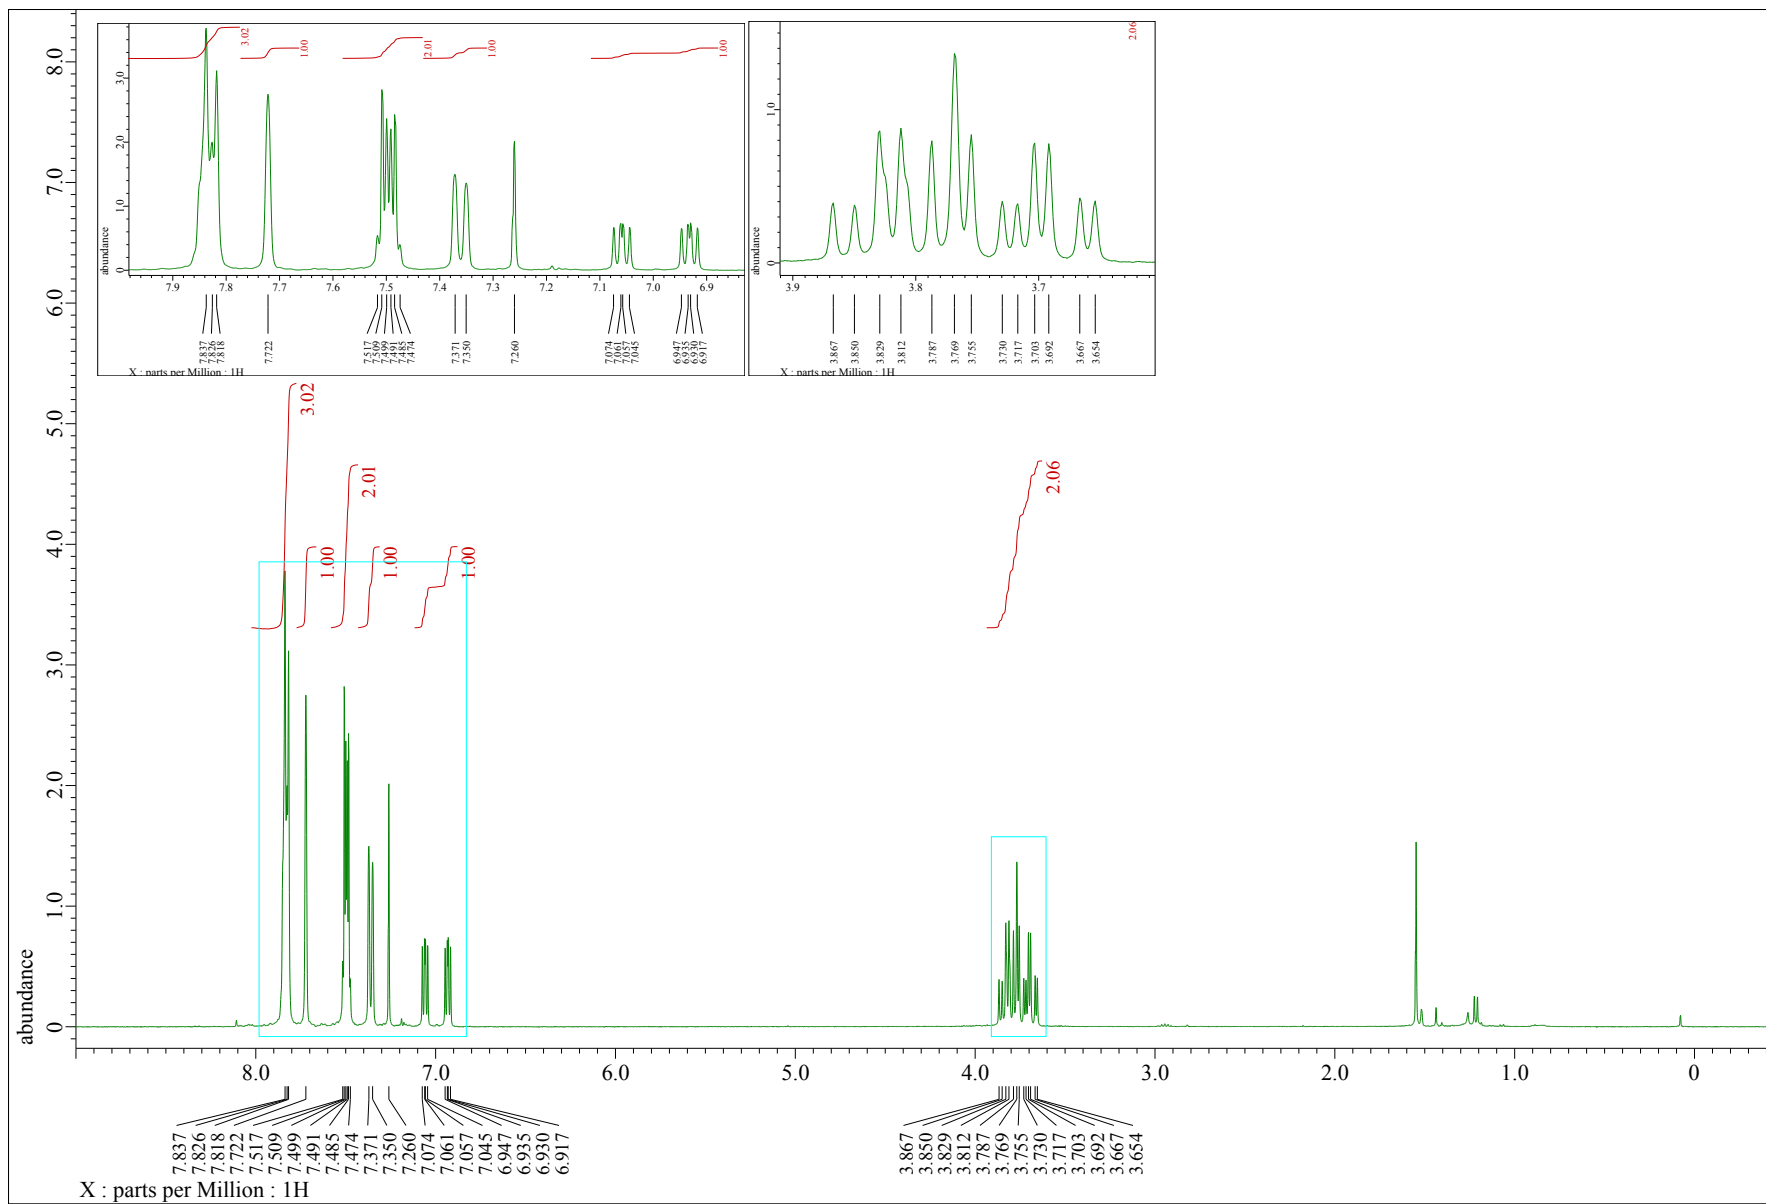

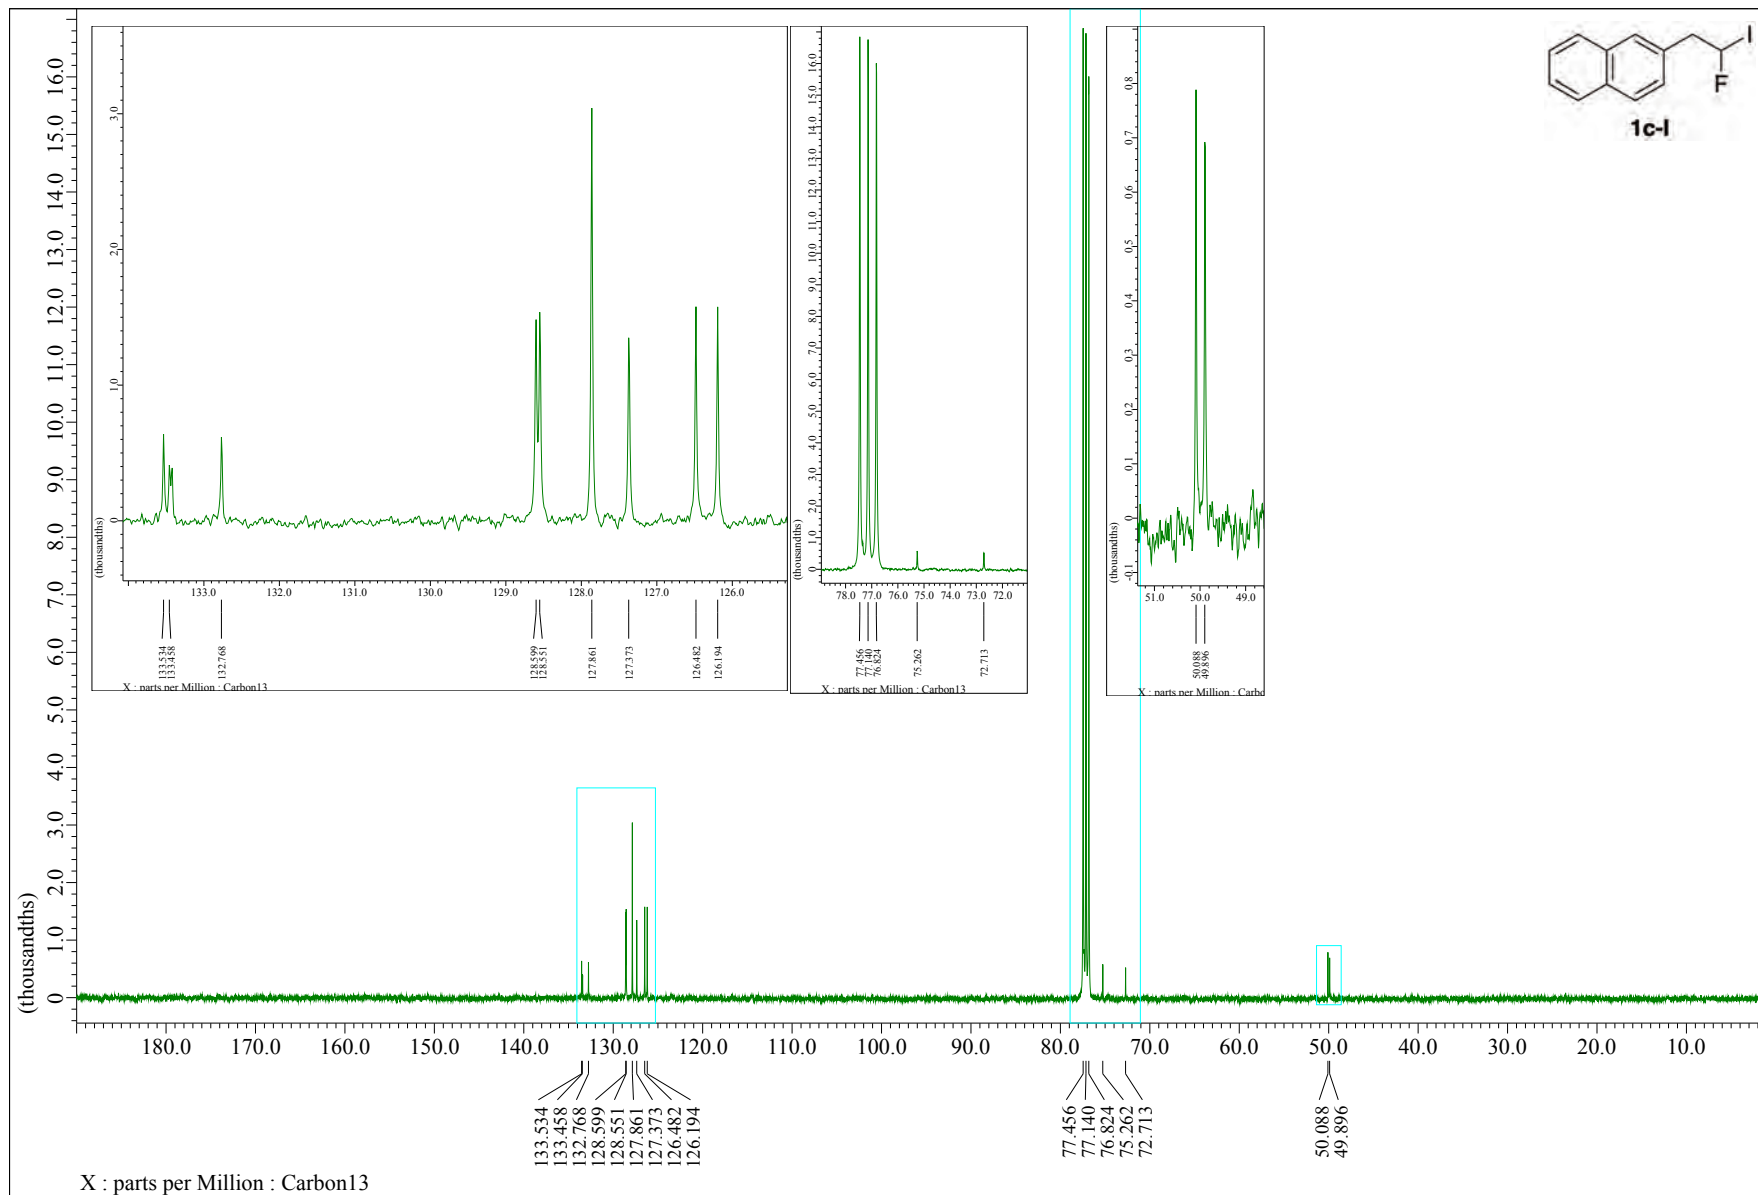



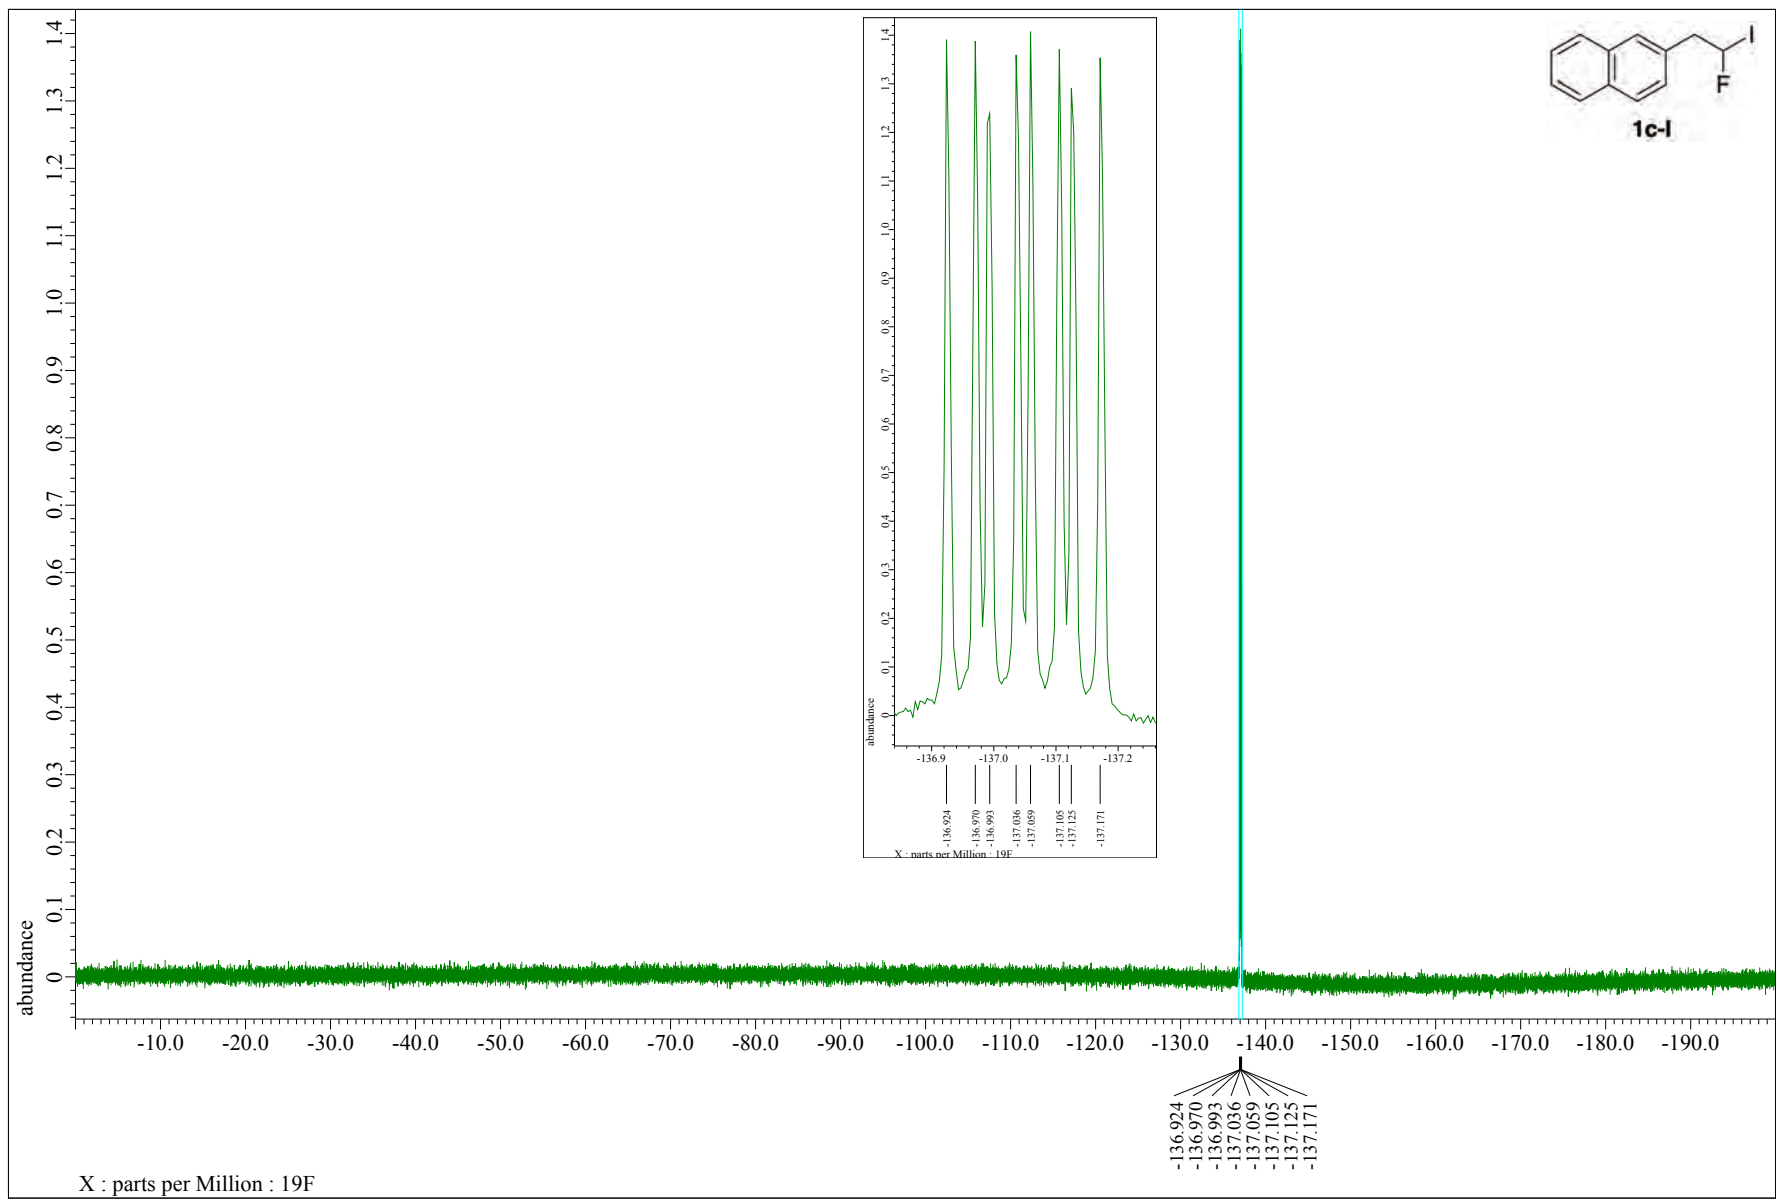

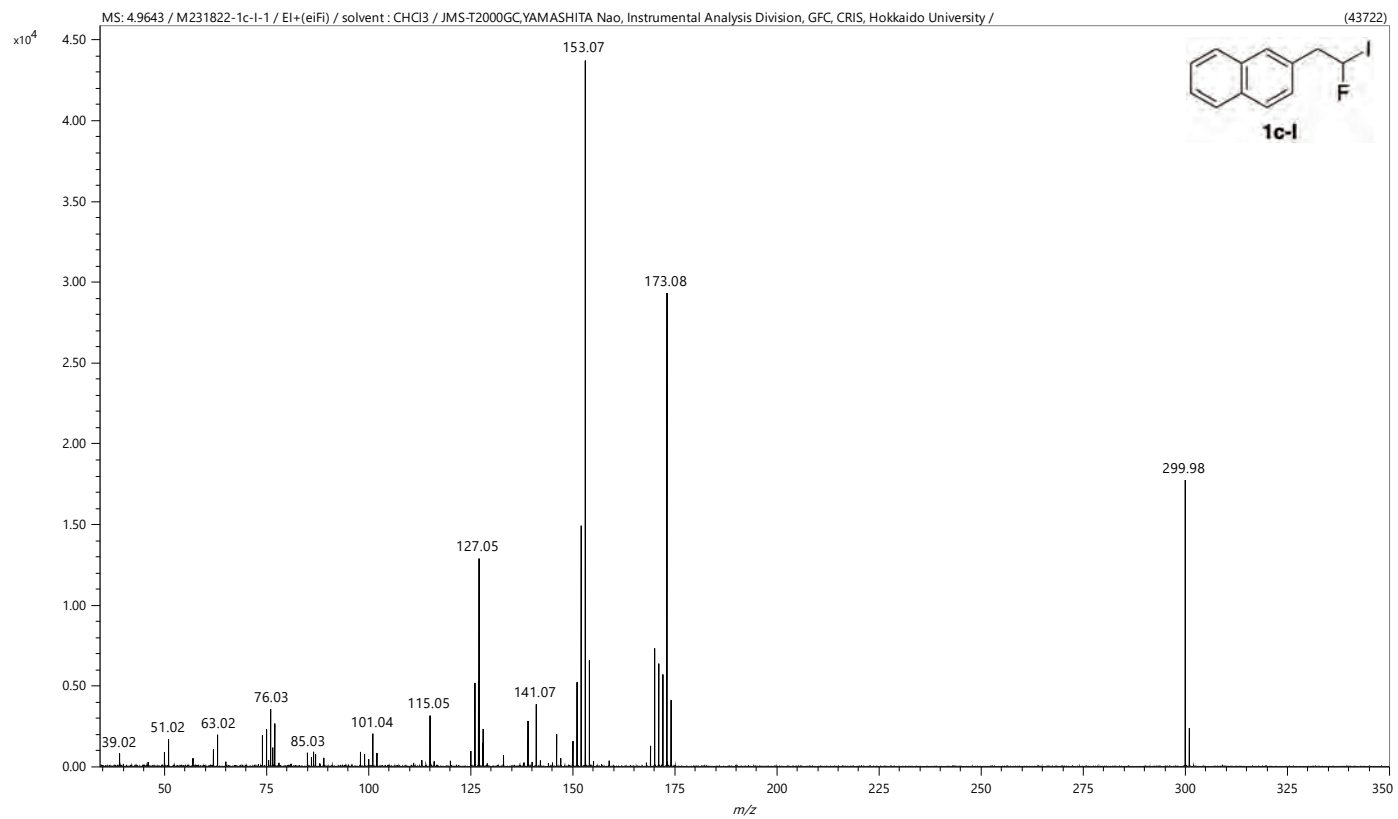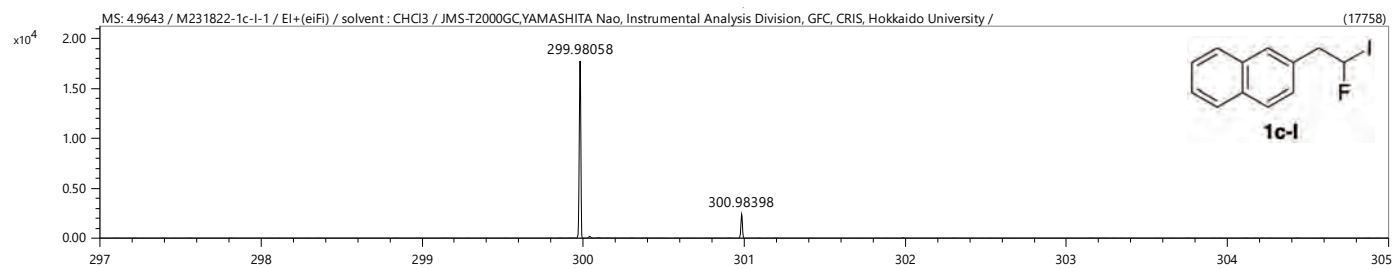

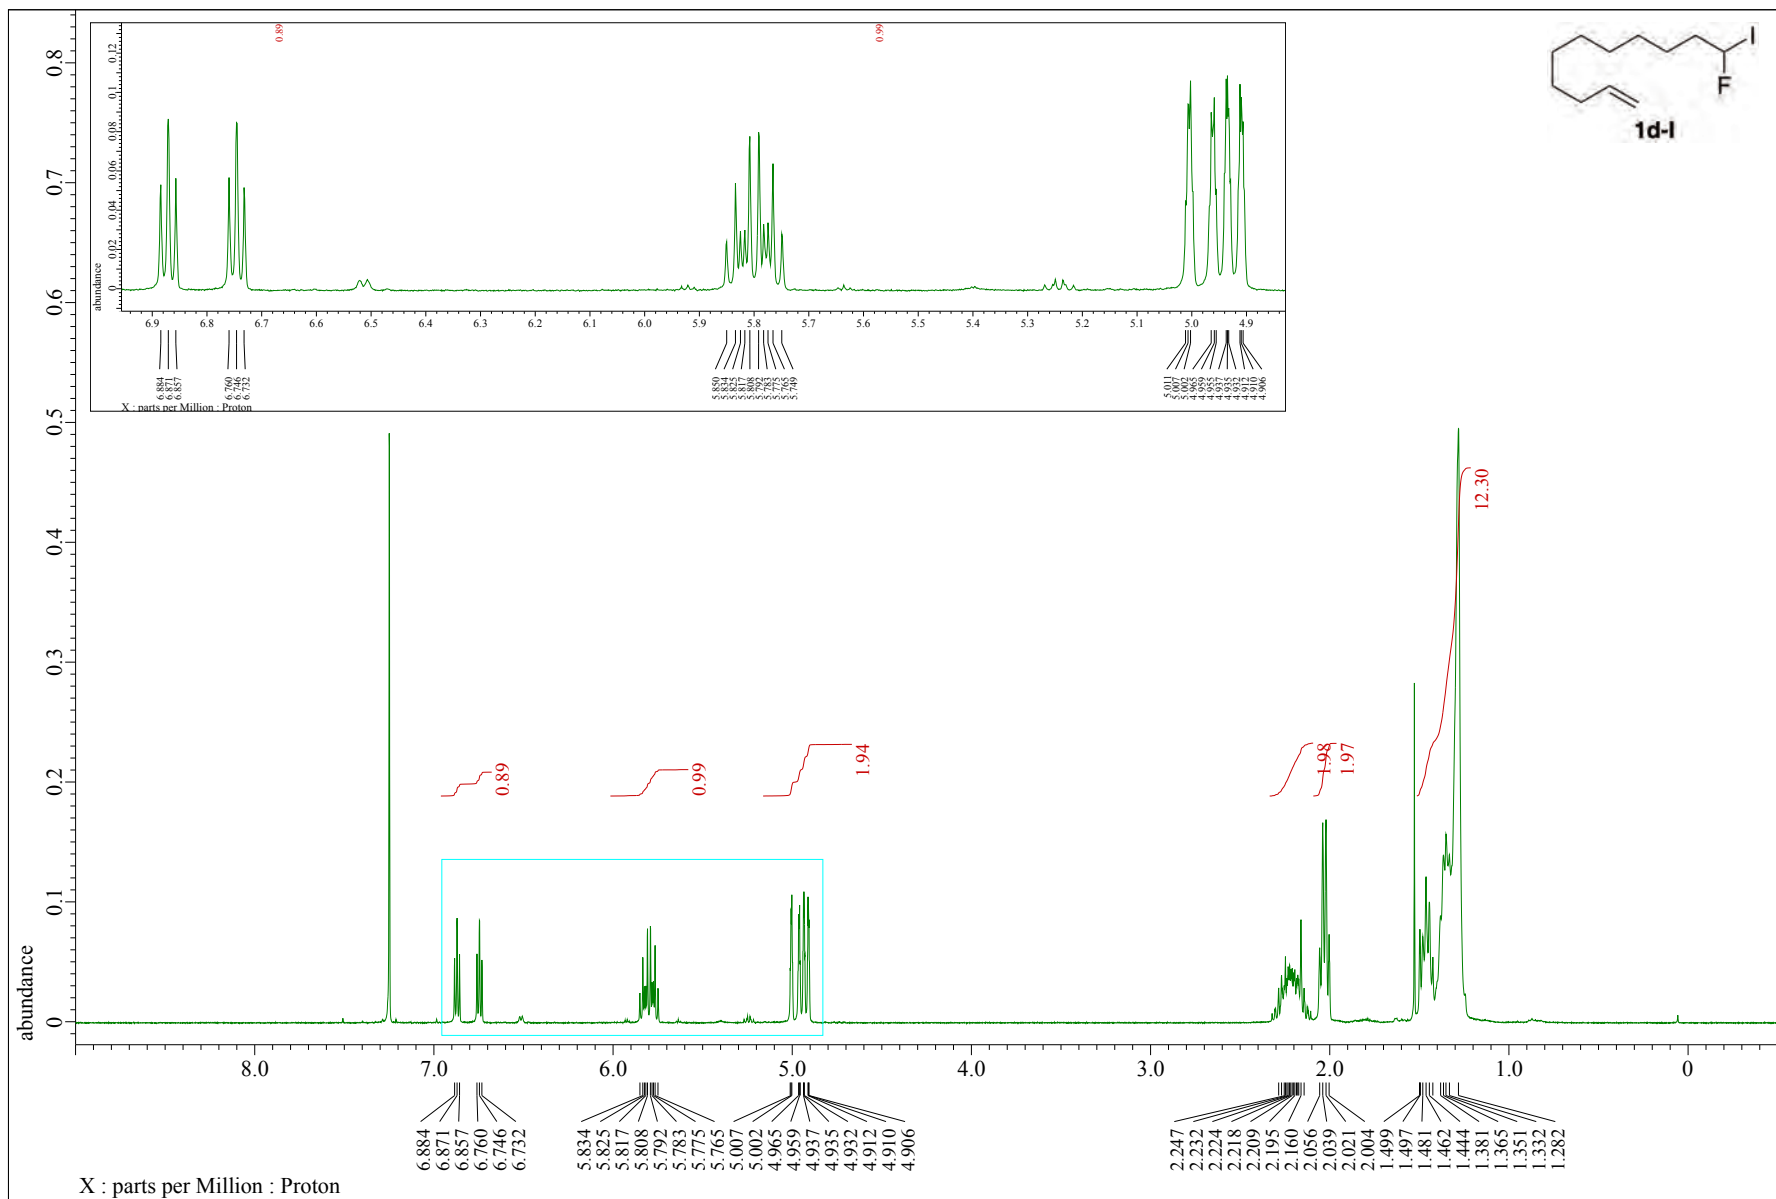

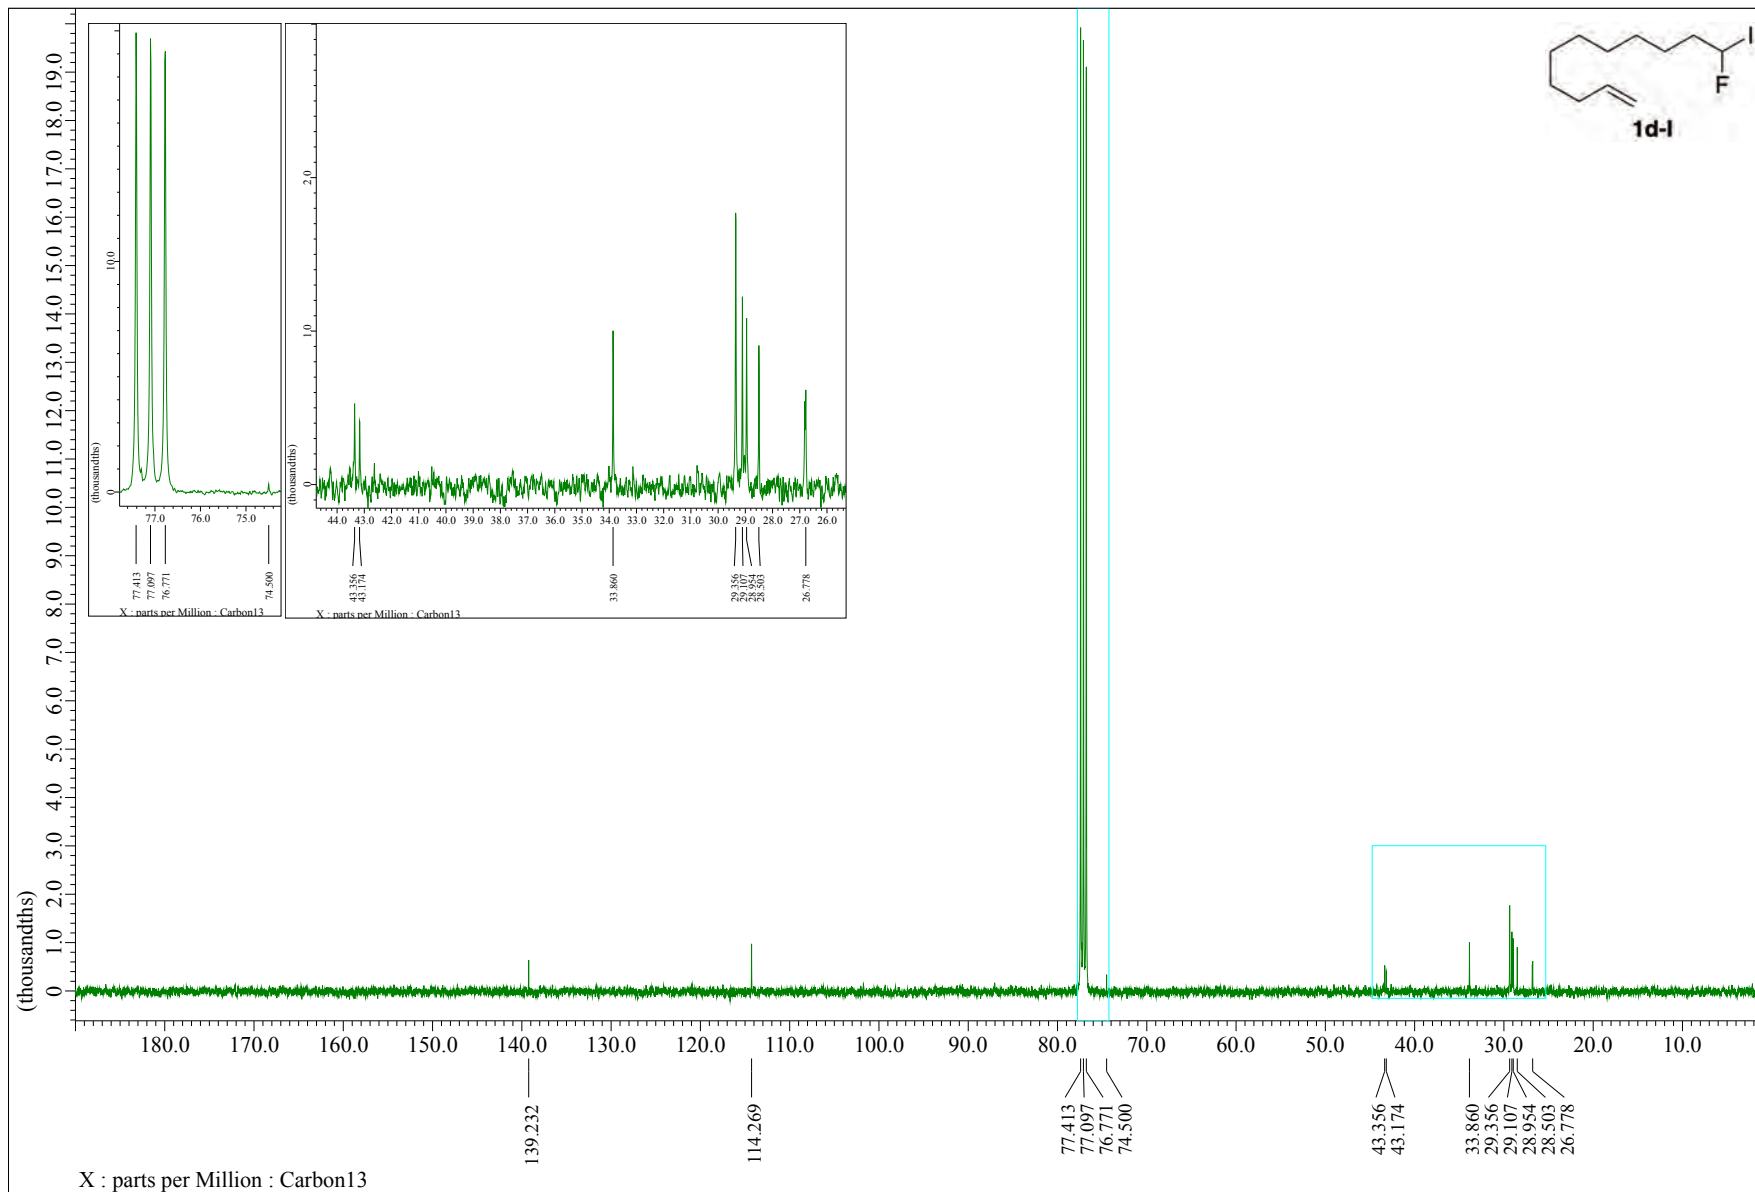

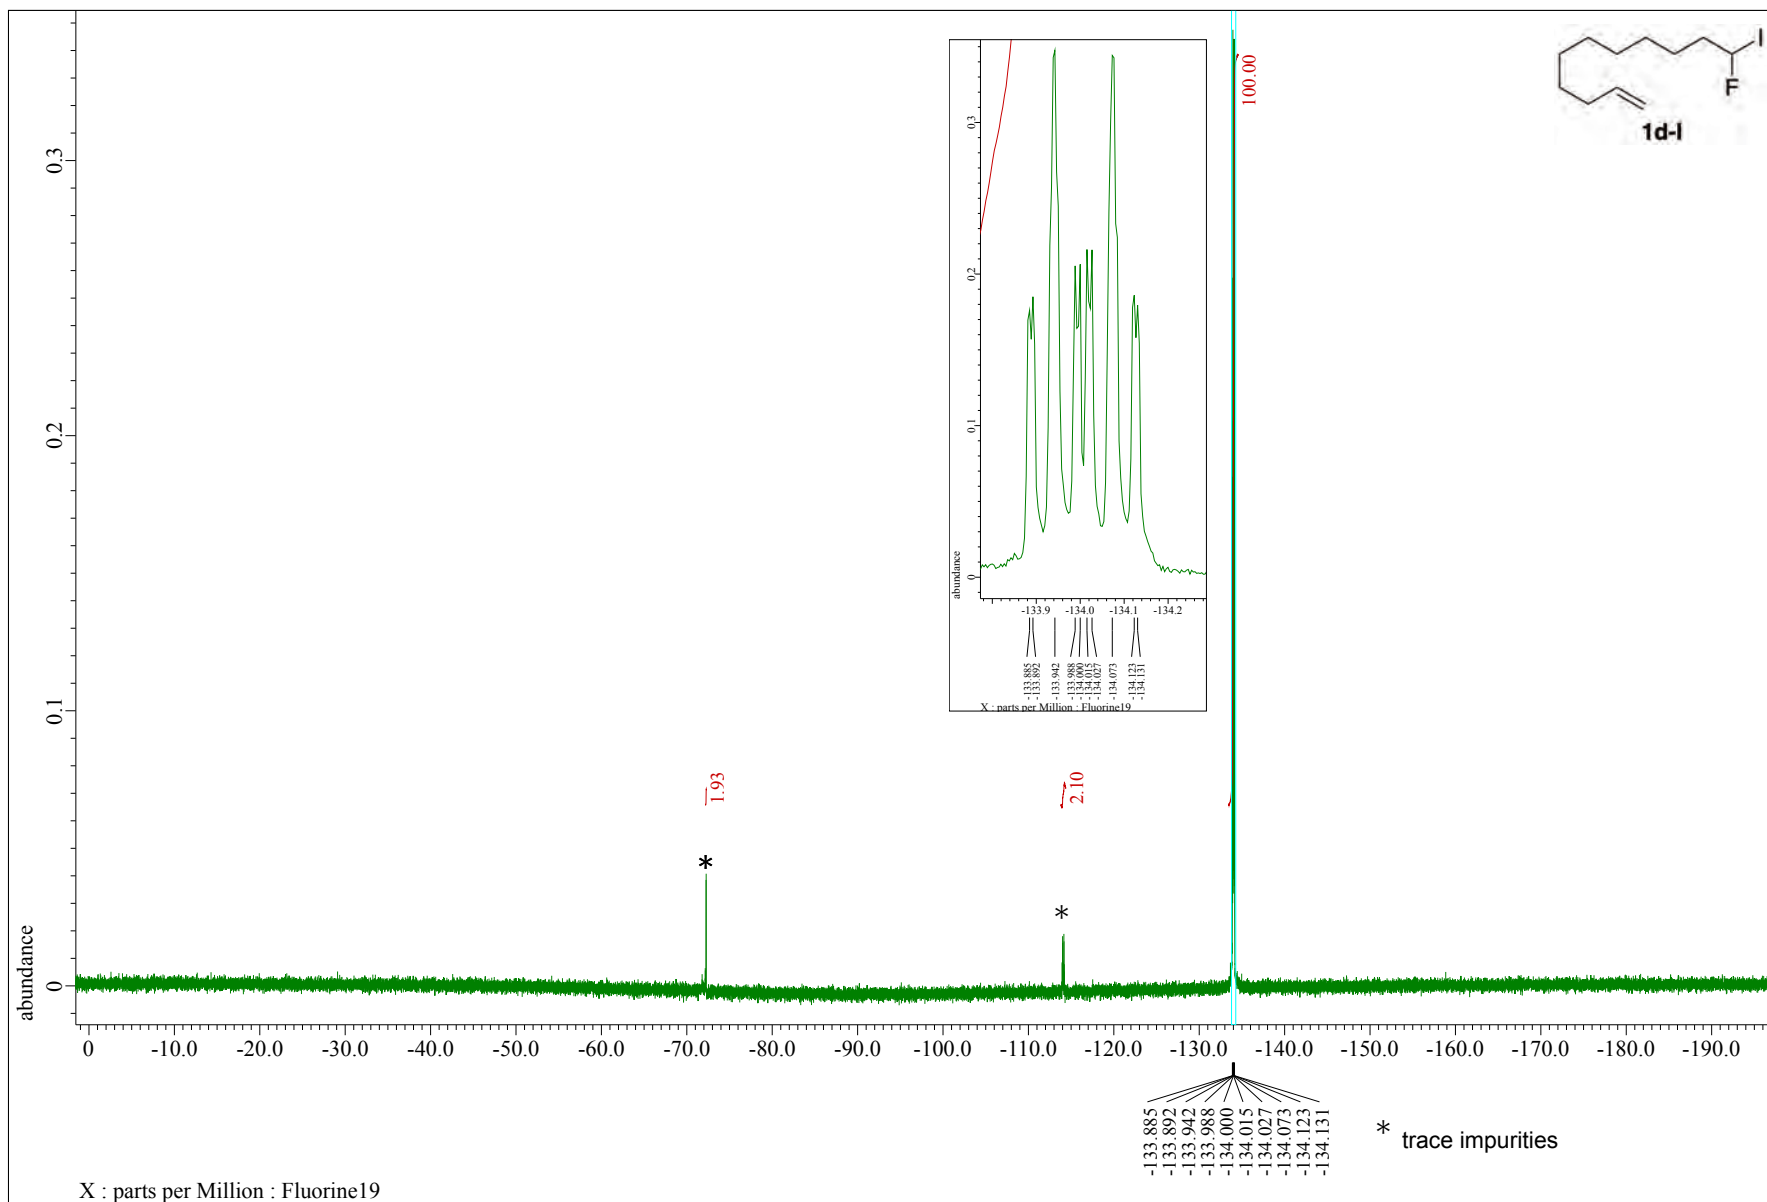

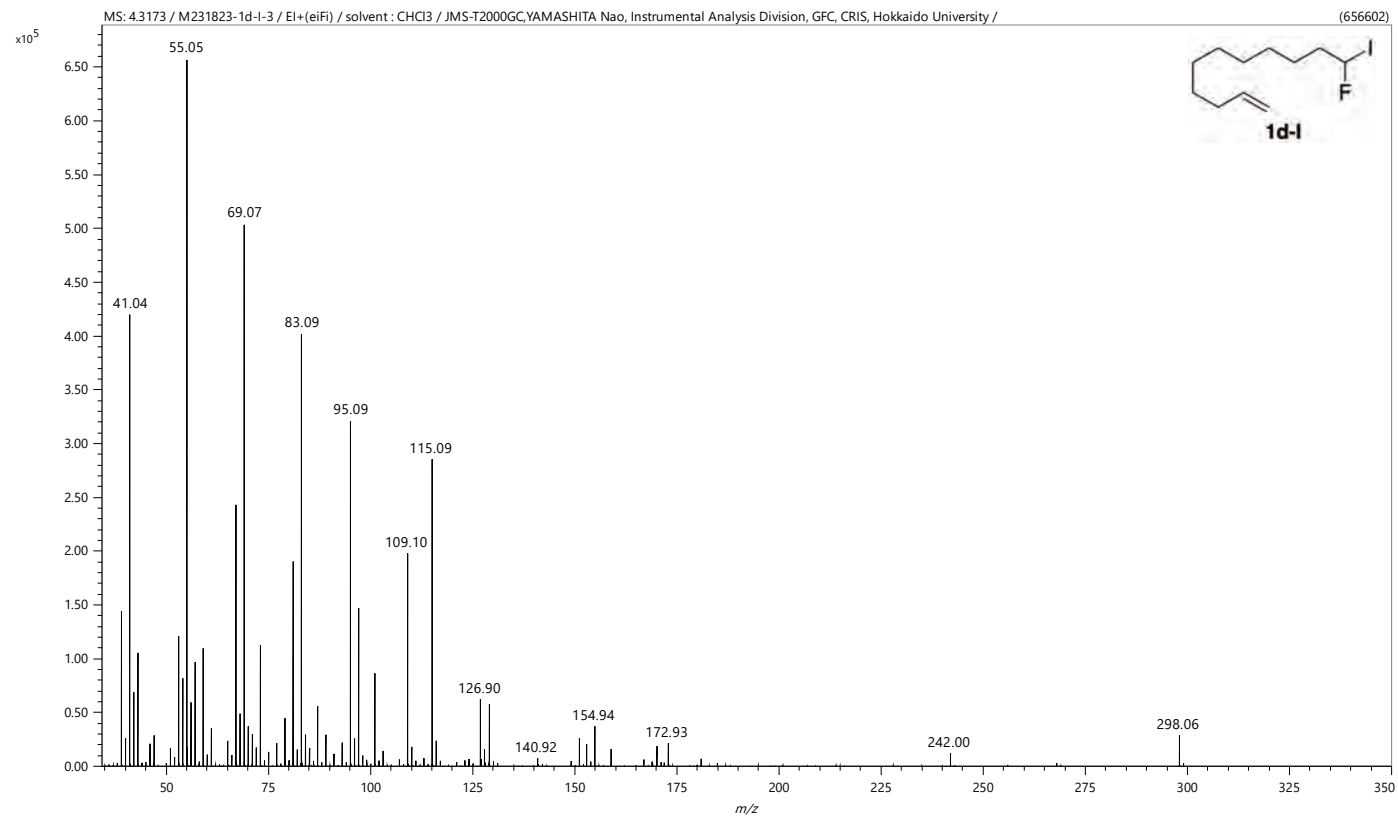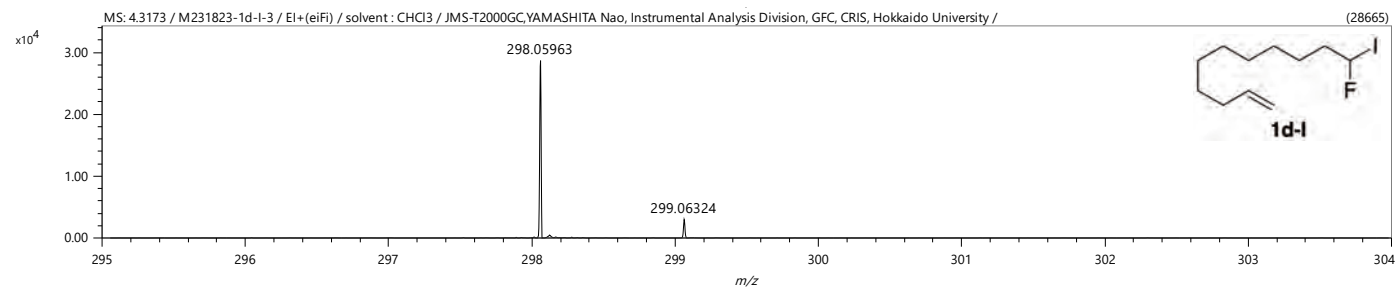

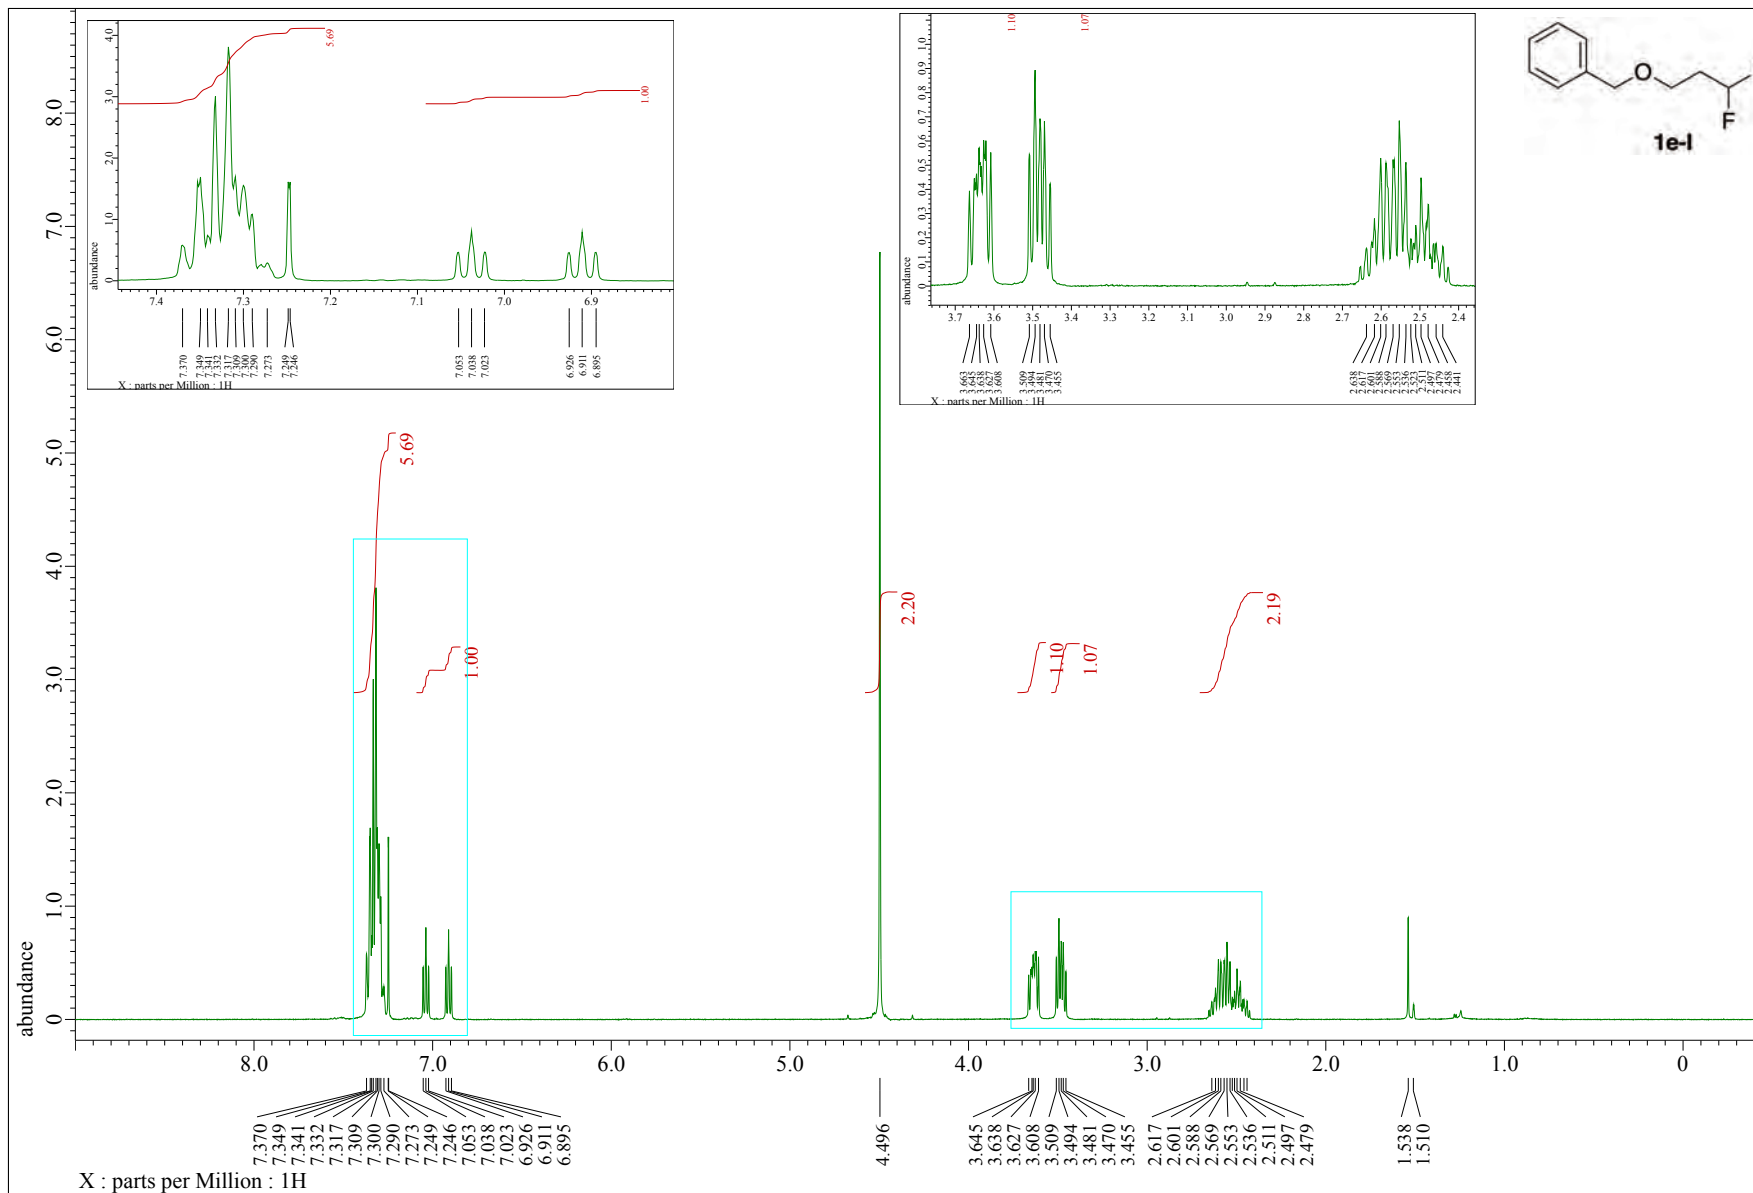

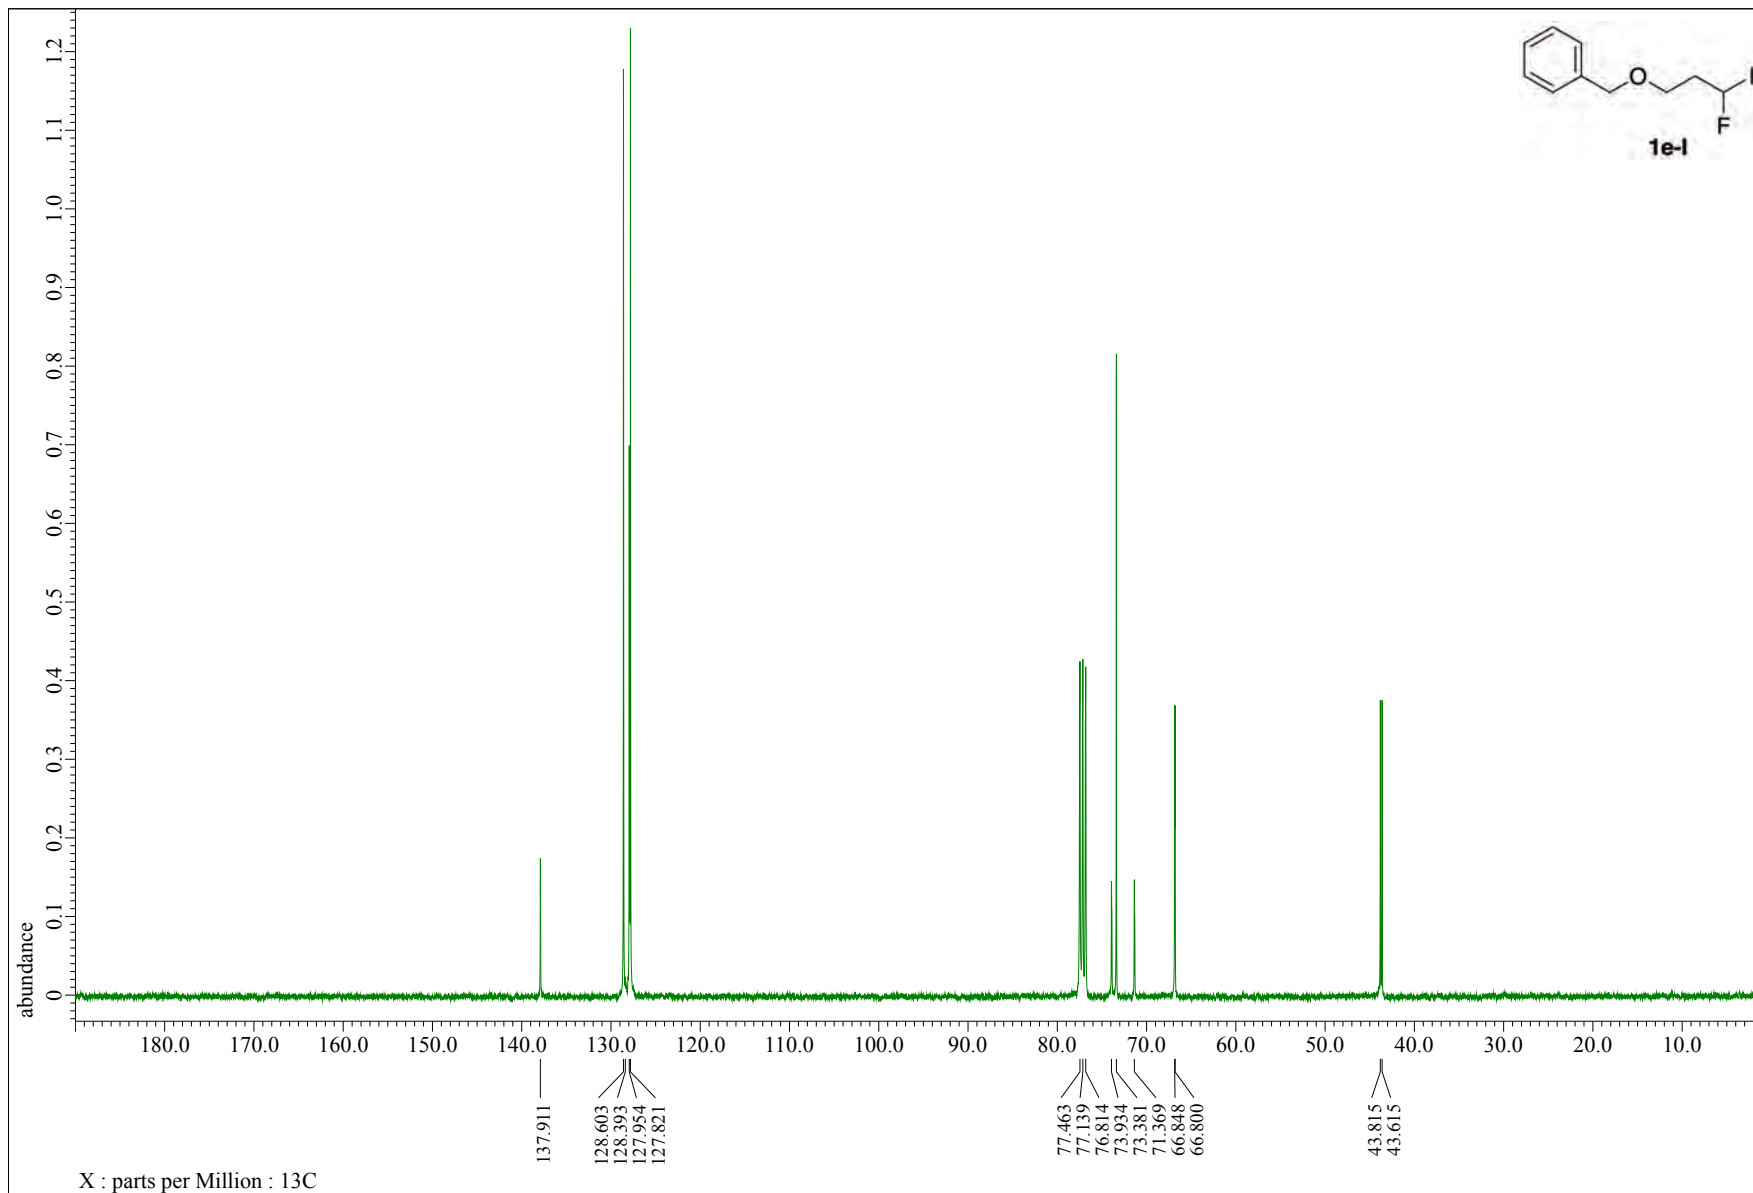



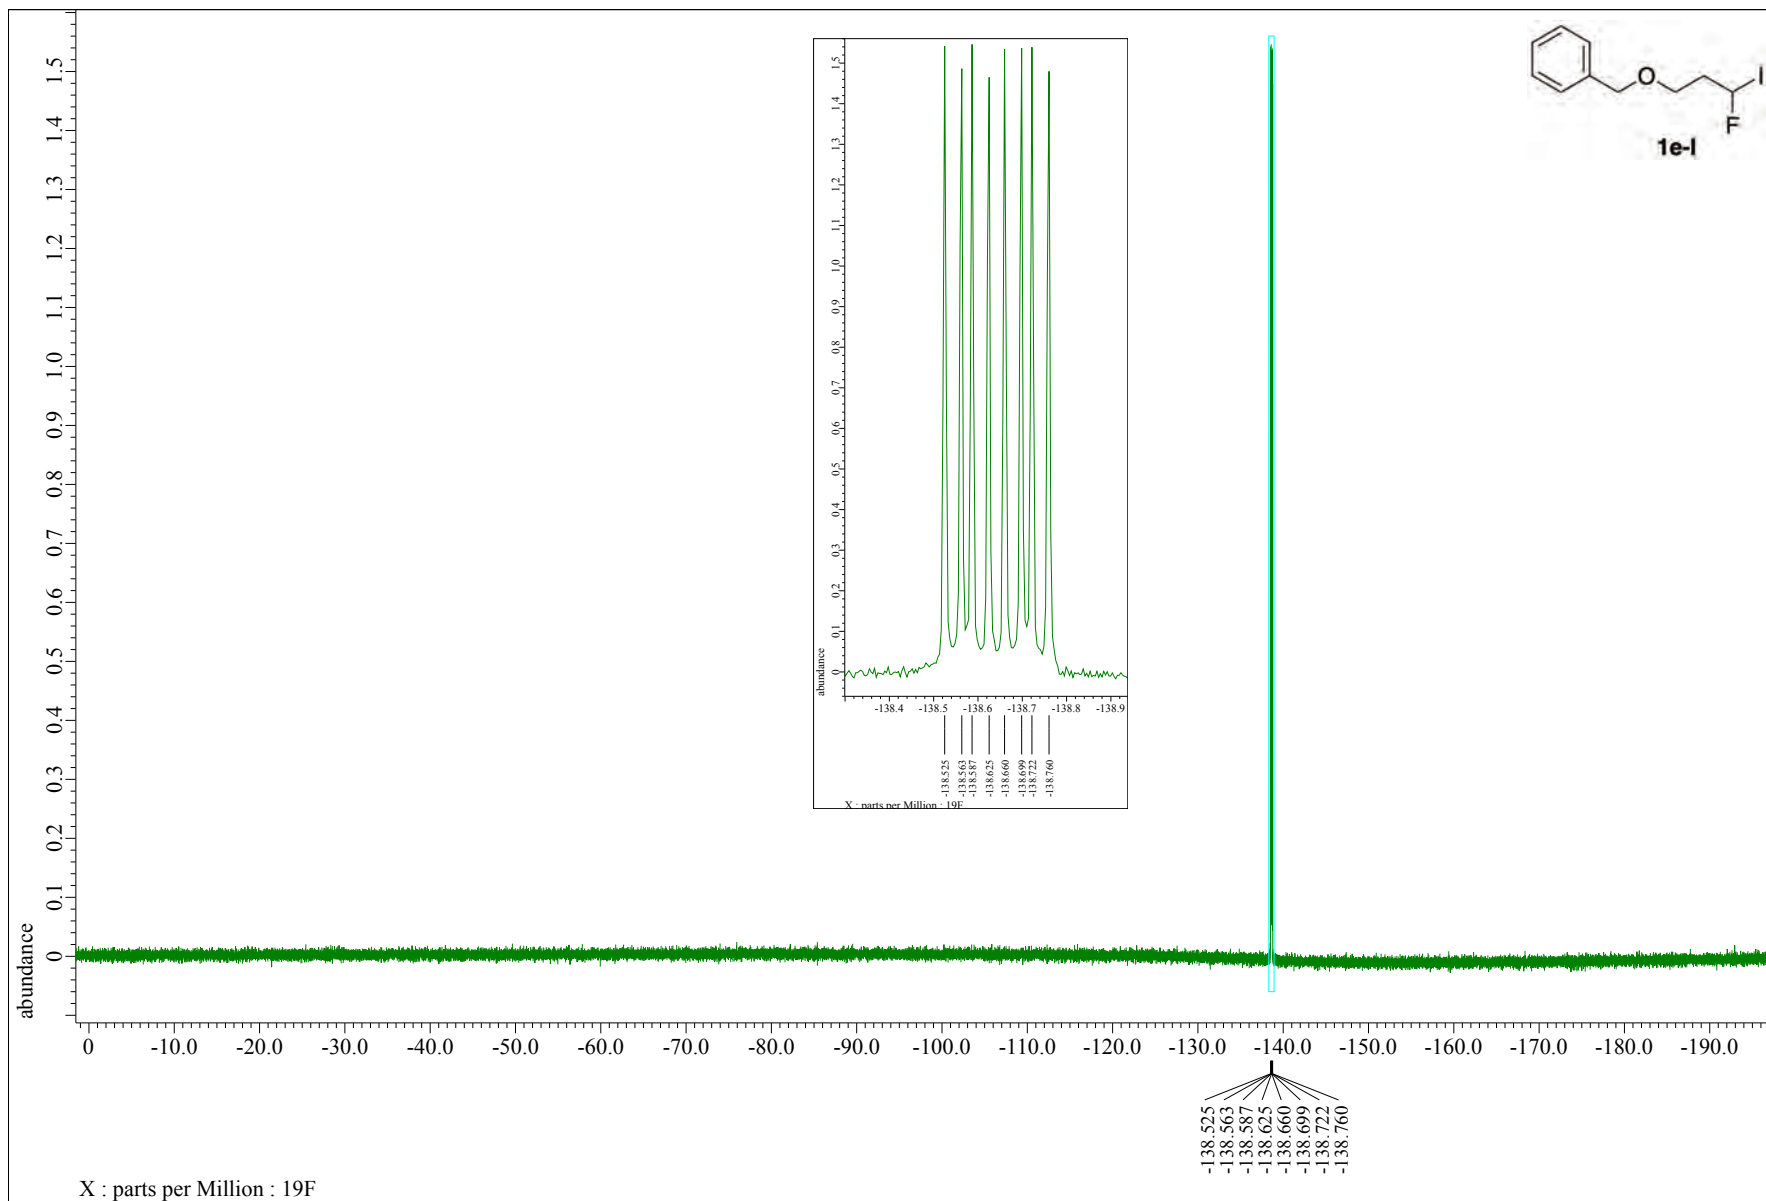

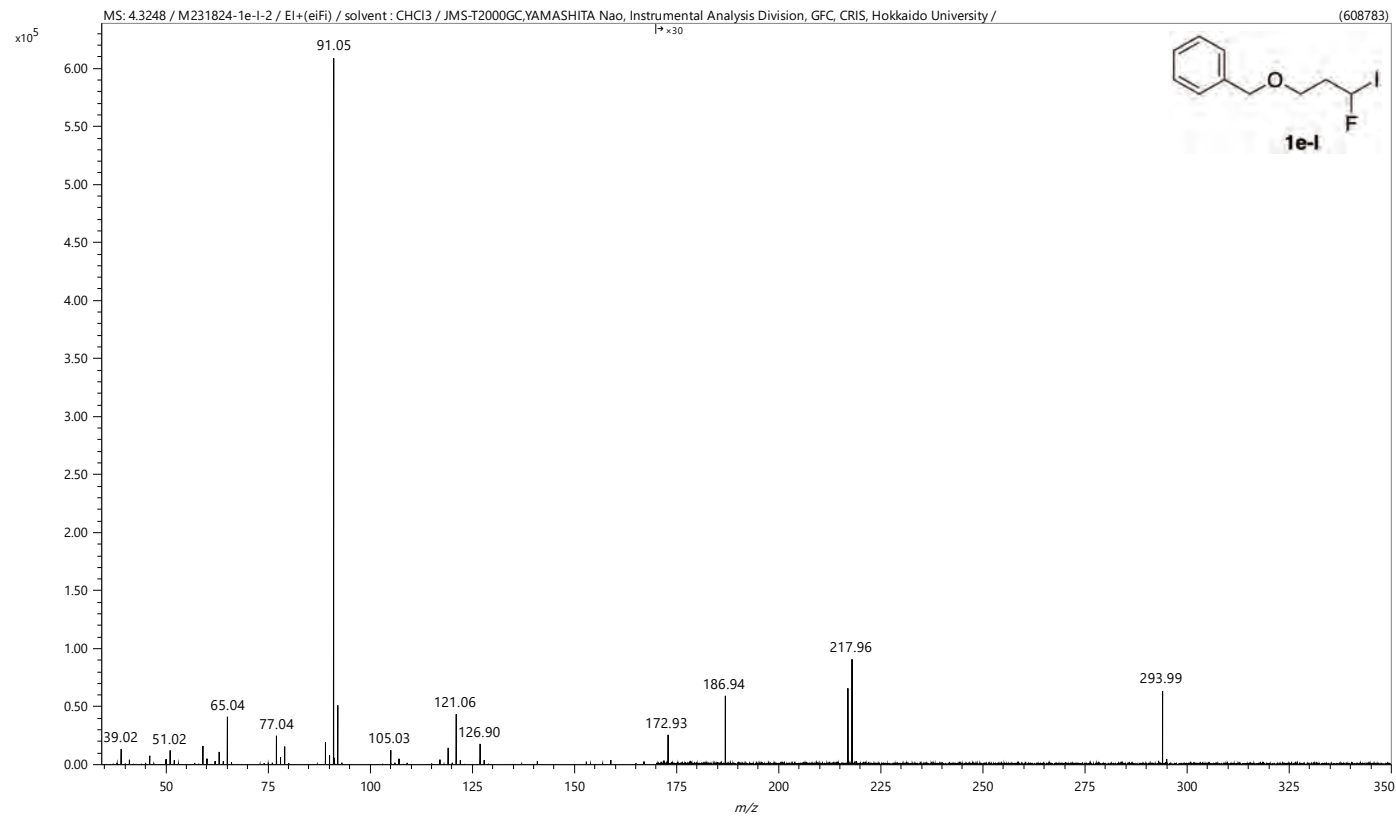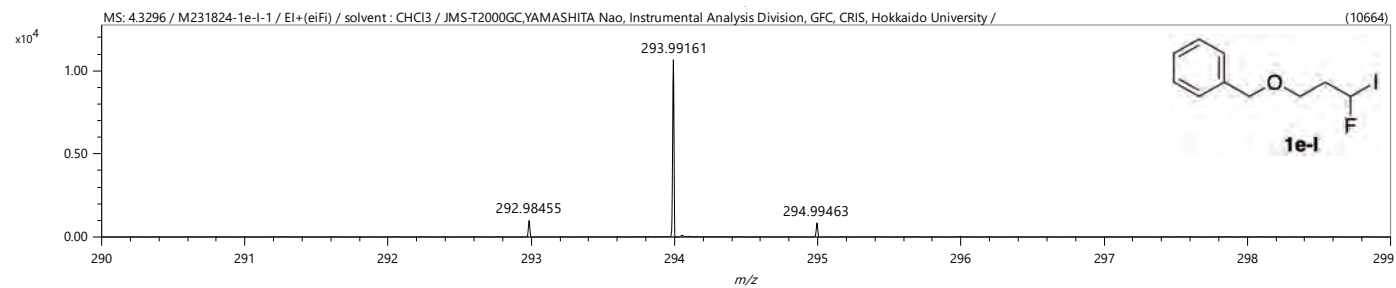

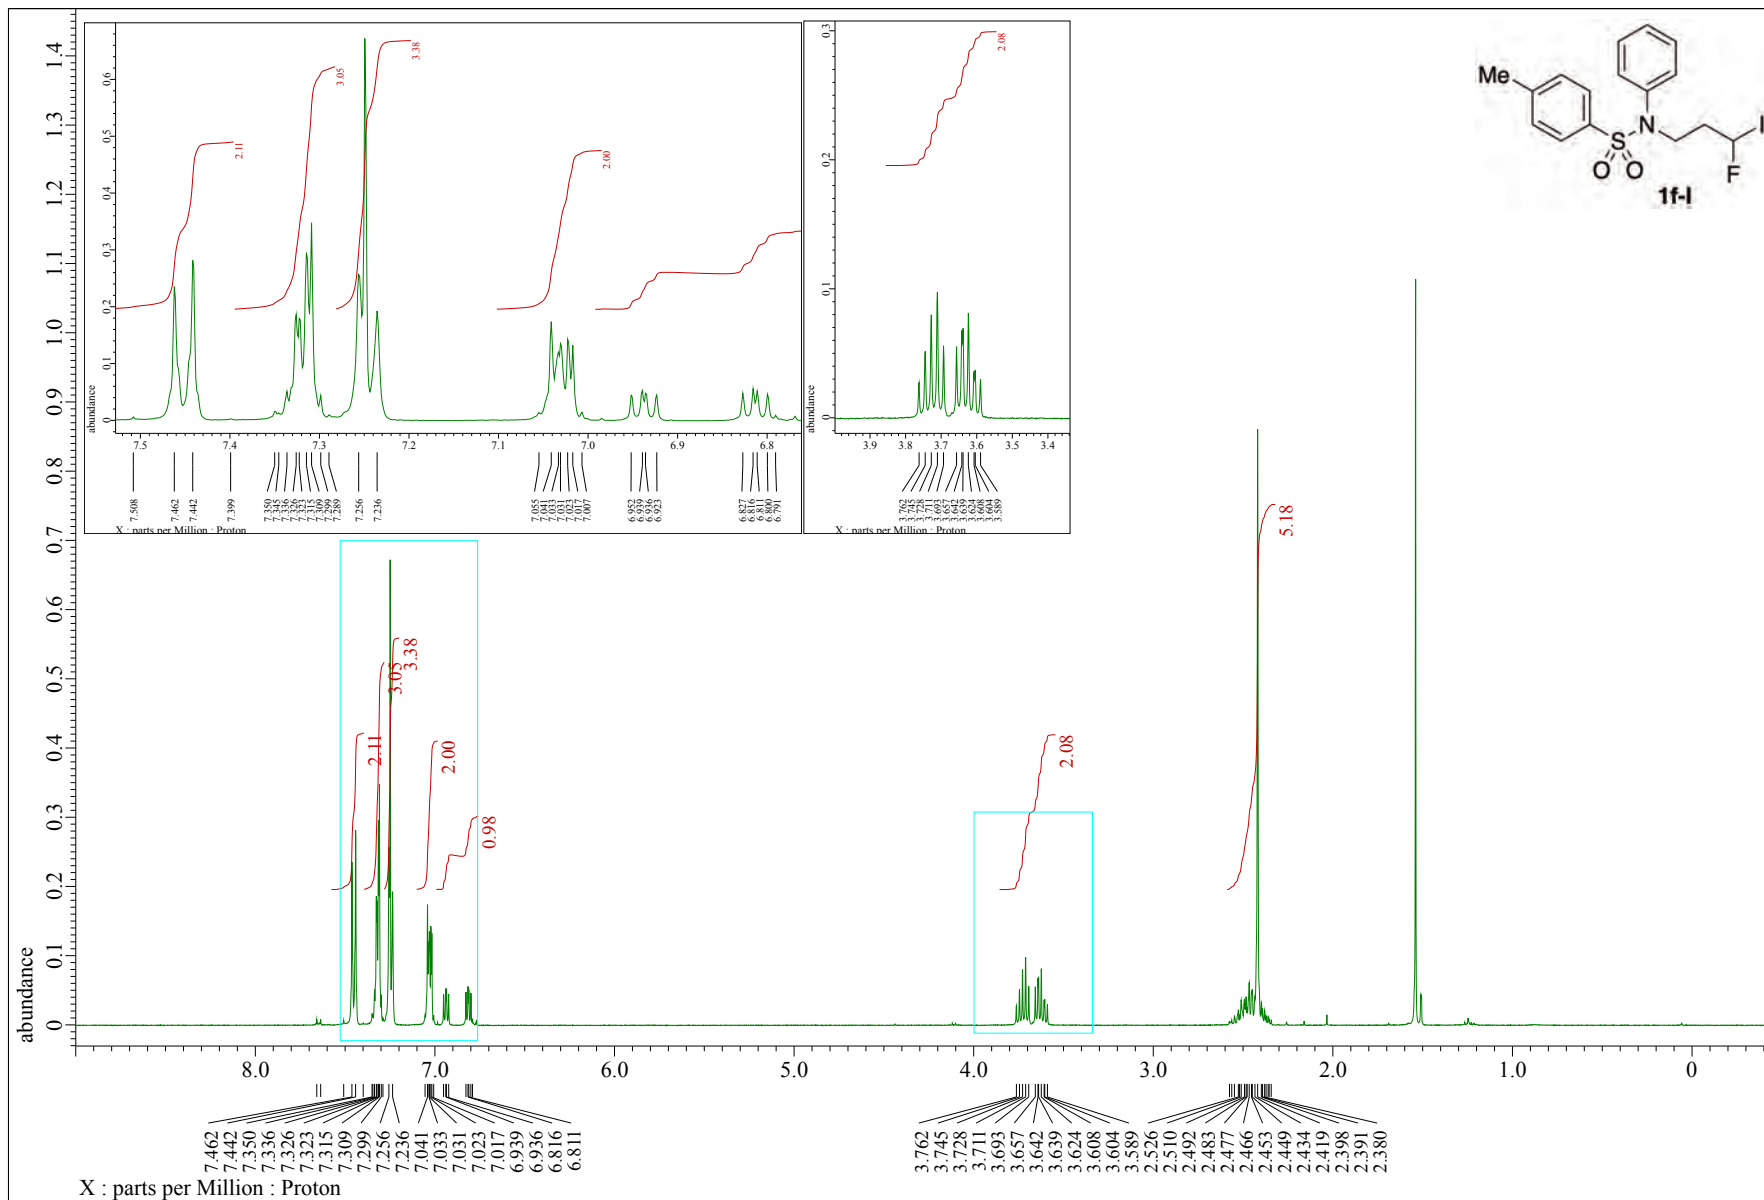

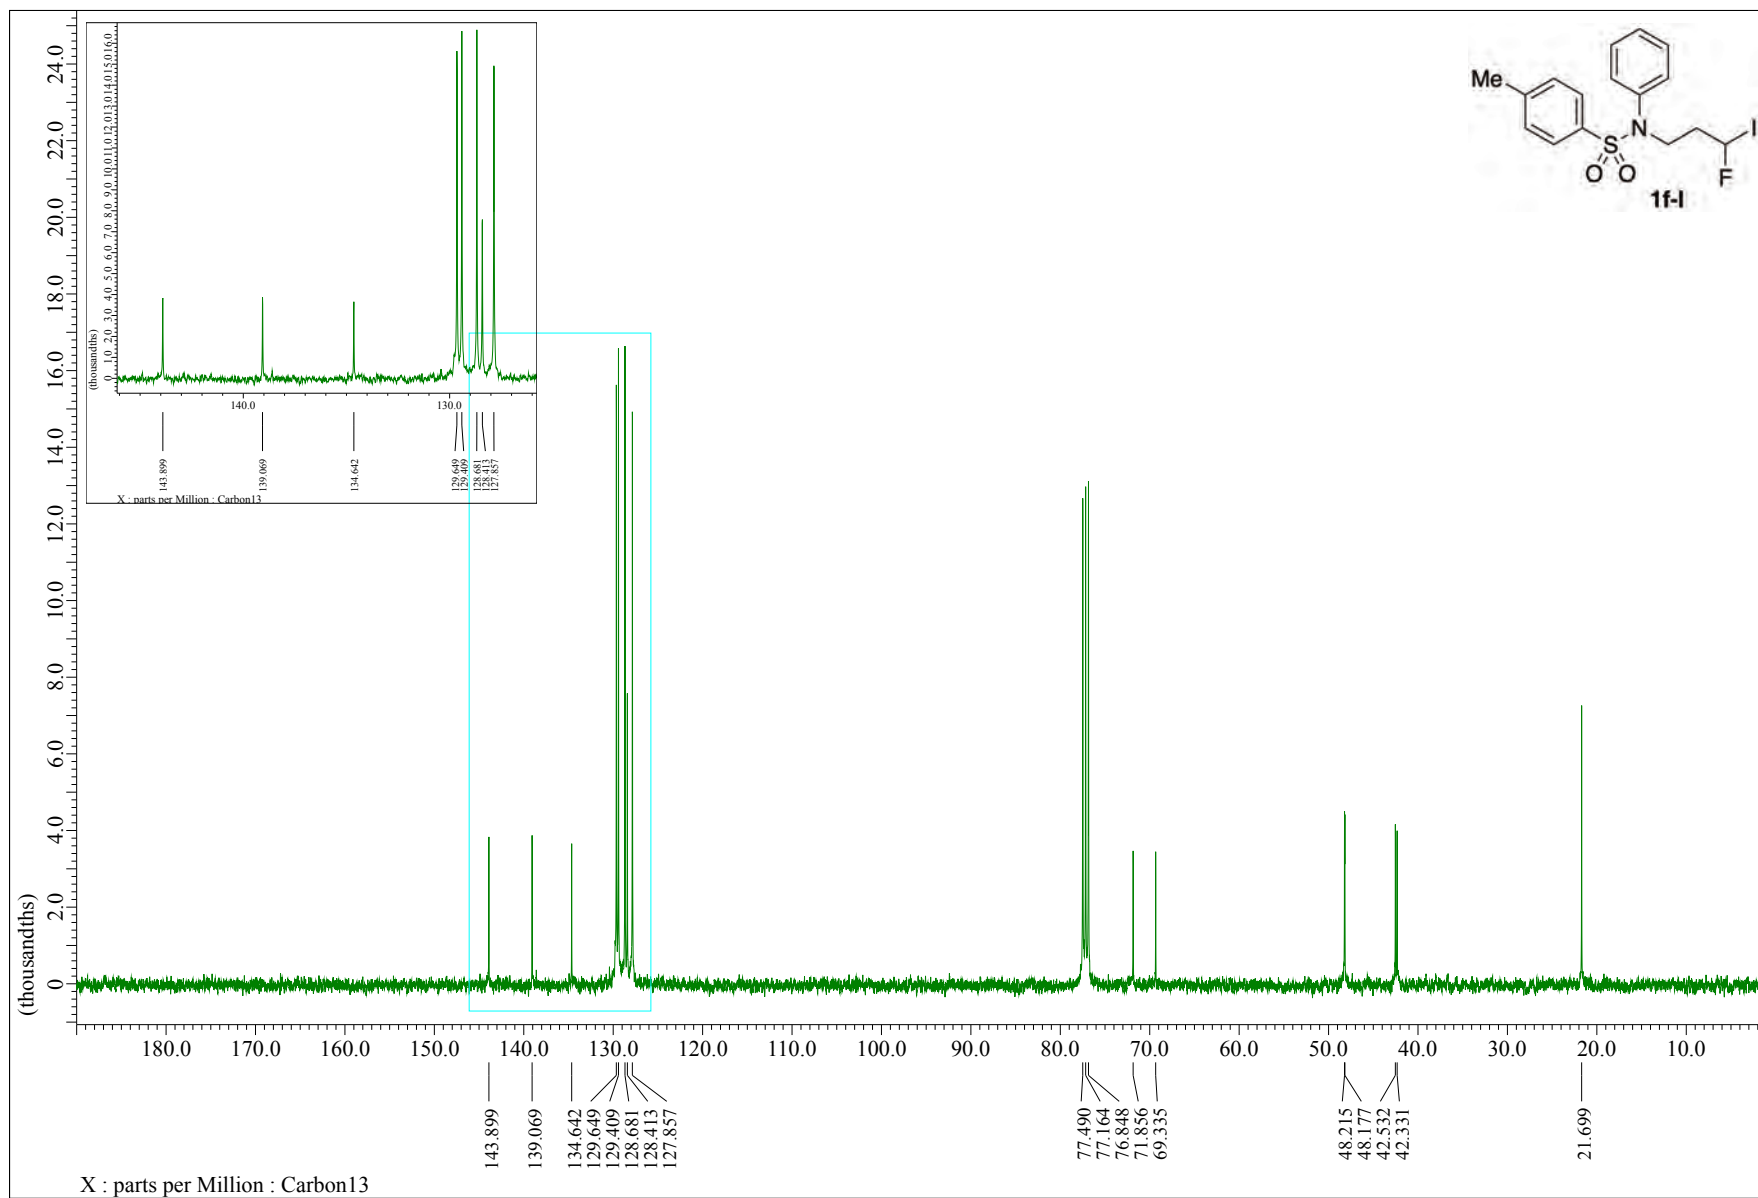

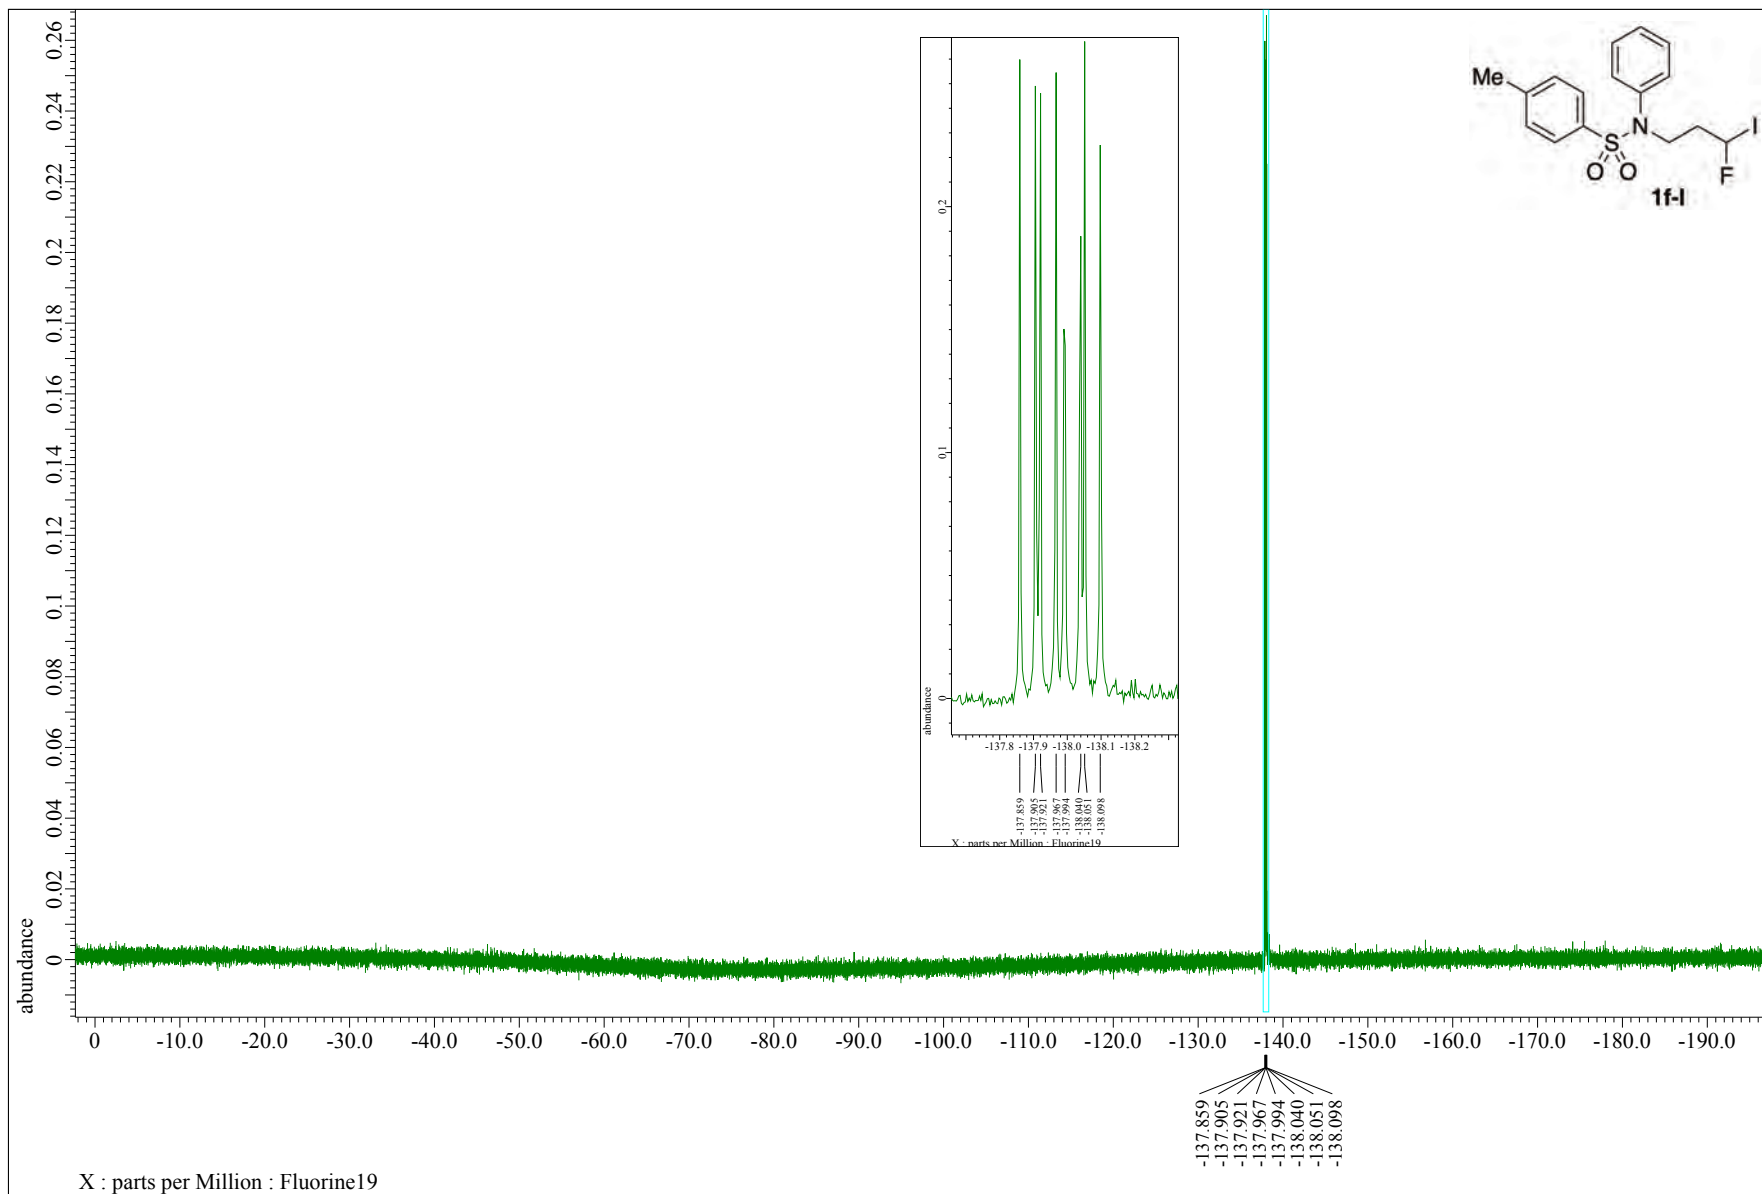

Sample No. : C:\Xcalibur\...\1227\BG\_231825\_1f\_1\_1\_1

Instrument : Exactive Plus

Mobile phase solvent : MeOH

Operator name : hayashi harumi

Sample solvent : CHCl3

Date : 12/28/23 11:44:45

Instrumental method : C:\Xcalibur\methods\ESI\_100ul\S60\_100ul\_mz150\_2000pn.meth

Instrumental Analysis Division, Global Facility Center, Creative Research Institution, Hokkaido University

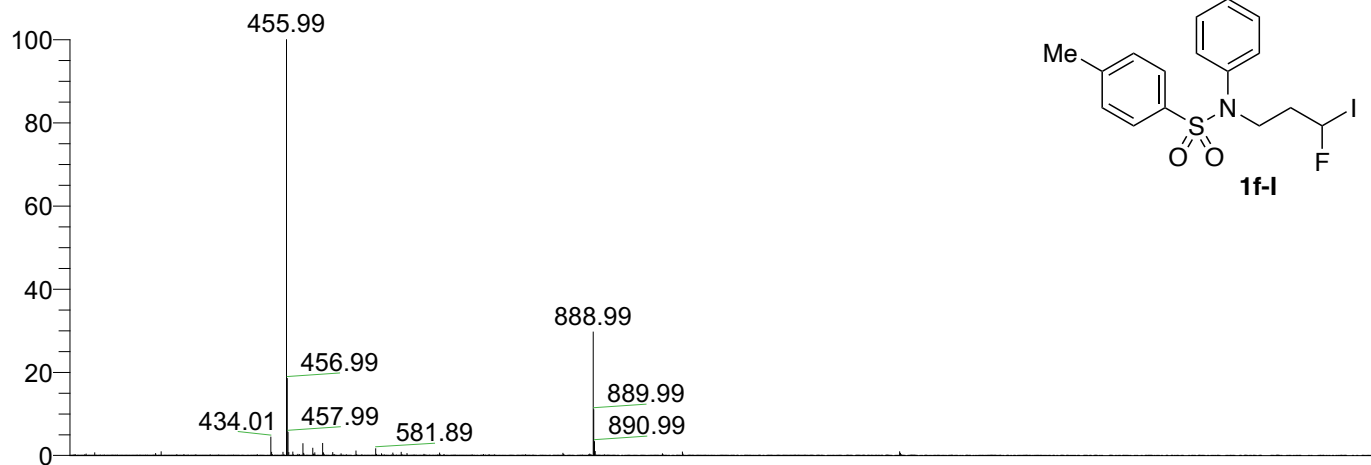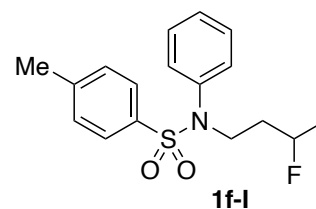

NL: 2.96E8  
BG\_231825\_1f\_1\_pn#1  
9-31 RT: 0.31-0.49  
AV: 7 T: FTMS + c ESI  
Full ms  
[150.00-2000.00]

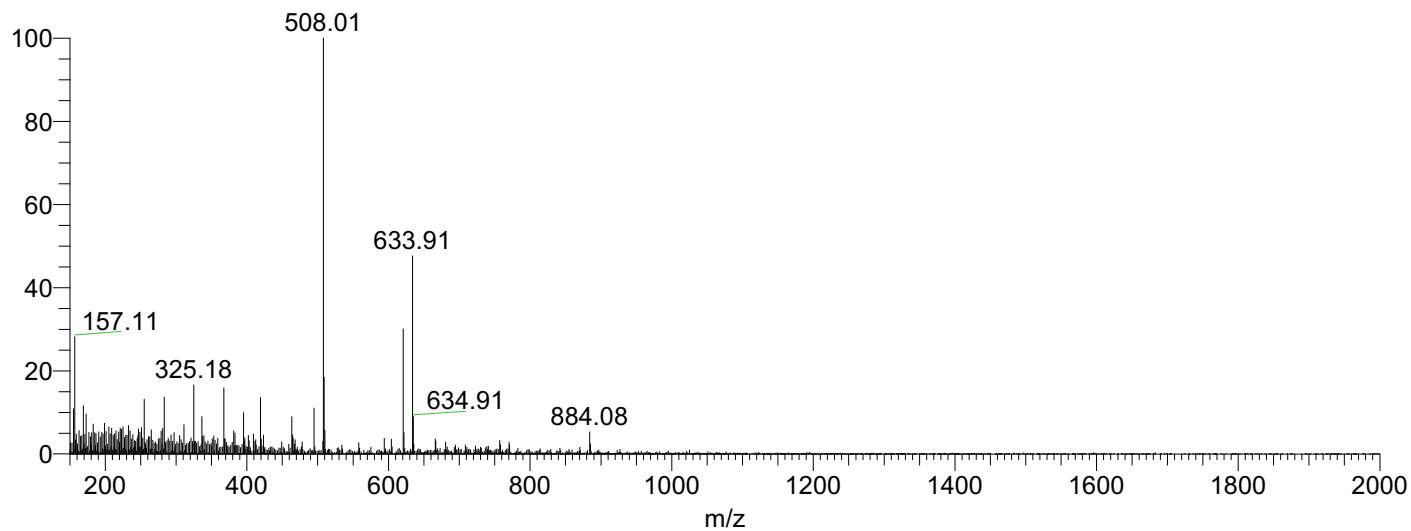

NL: 2.20E6  
BG\_231825\_1f\_1\_pn#1  
8-31 RT: 0.30-0.48  
AV: 7 T: FTMS - c ESI  
Full ms  
[150.00-2000.00]

Sample No. : C:\Xcalibur\...1227\2010z5\_1f\_1\_pn

Instrument : Exactive Plus

Mobile phase solvent : MeOH

Operator name : hayashi harumi

Sample solvent : CHCl3

Date : 12/27/23 15:48:25

Instrumental method : C:\Xcalibur\methods\ESI\_100ul\S60\_100ul\_mz150\_2000pn.meth

Instrumental Analysis Division, Global Facility Center, Creative Research Institution, Hokkaido University

231825\_1f\_1\_pn#22-25 RT: 0.37-0.40 AV: 2 NL: 1.23E8

T: FTMS + p ESI Full ms [150.0000-2000.0000]

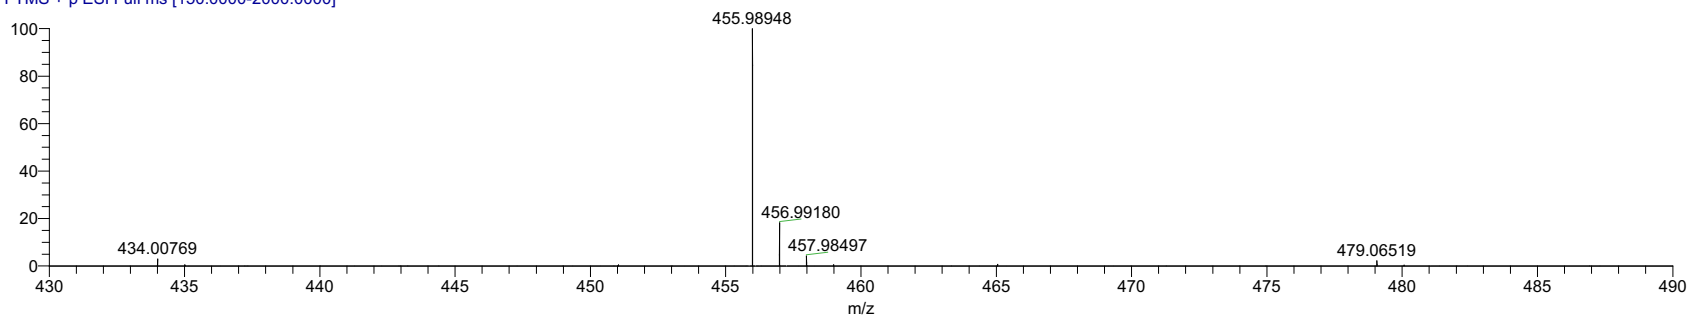

231825\_1f\_1\_pn#26 RT: 0.43 AV: 1 NL: 7.12E7

T: FTMS + p ESI Full ms [150.0000-2000.0000]

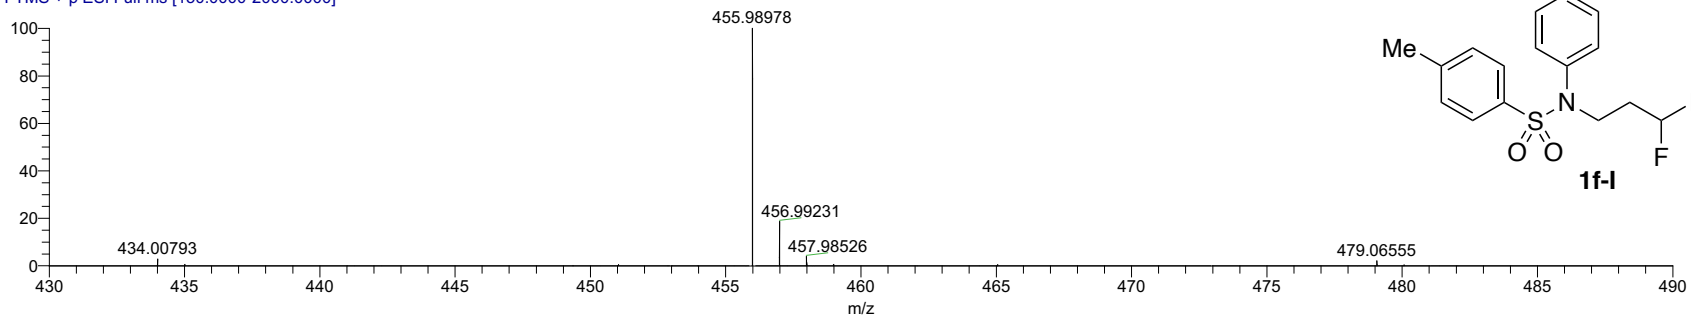

231825\_1f\_1\_pn#29-32 RT: 0.46-0.49 AV: 2 NL: 4.92E7

T: FTMS + p ESI Full ms [150.0000-2000.0000]

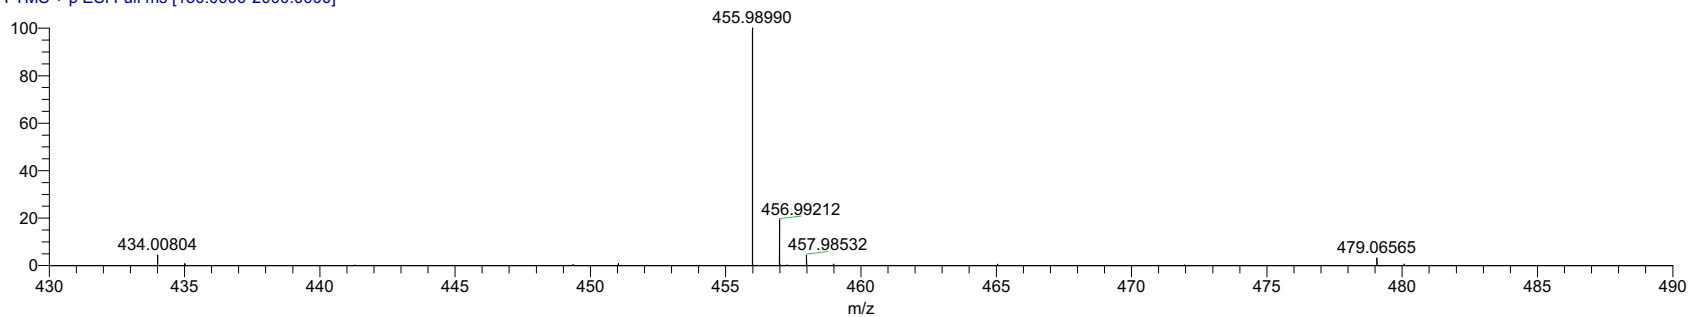

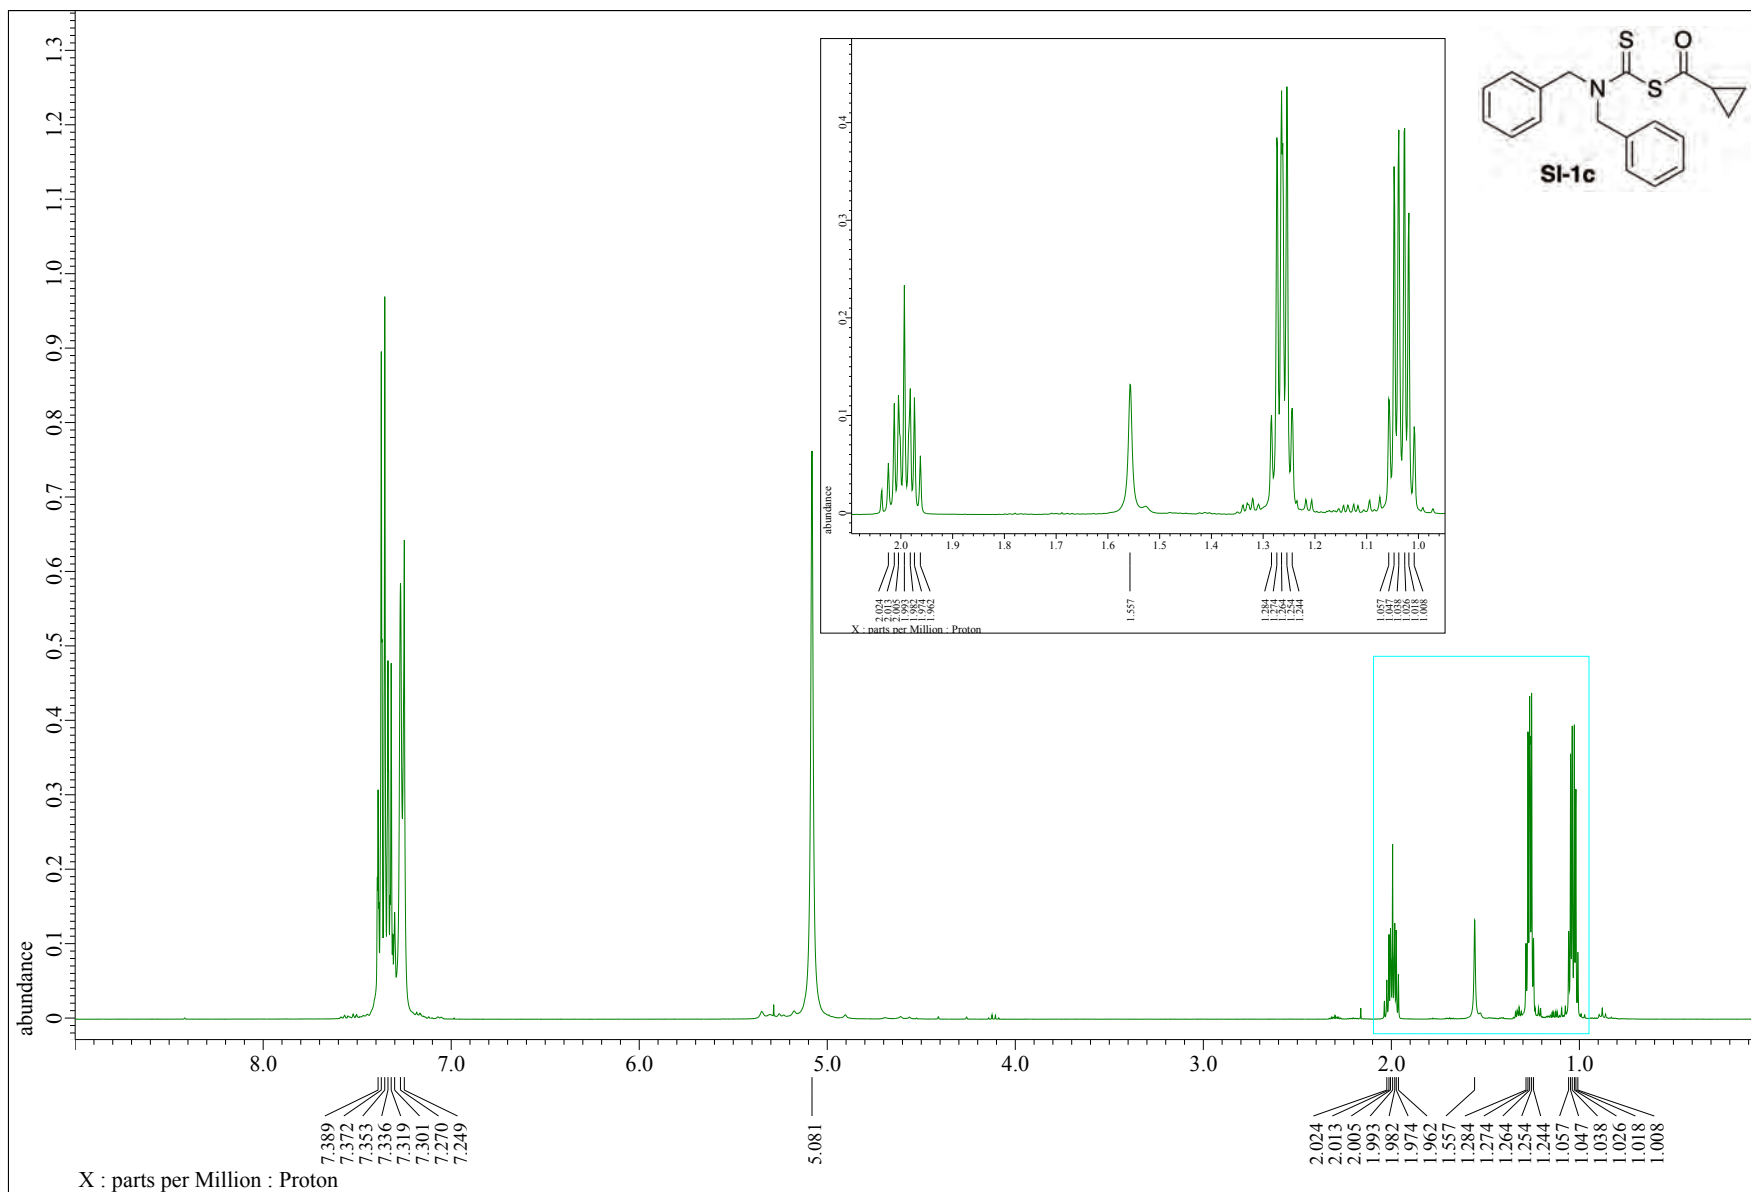



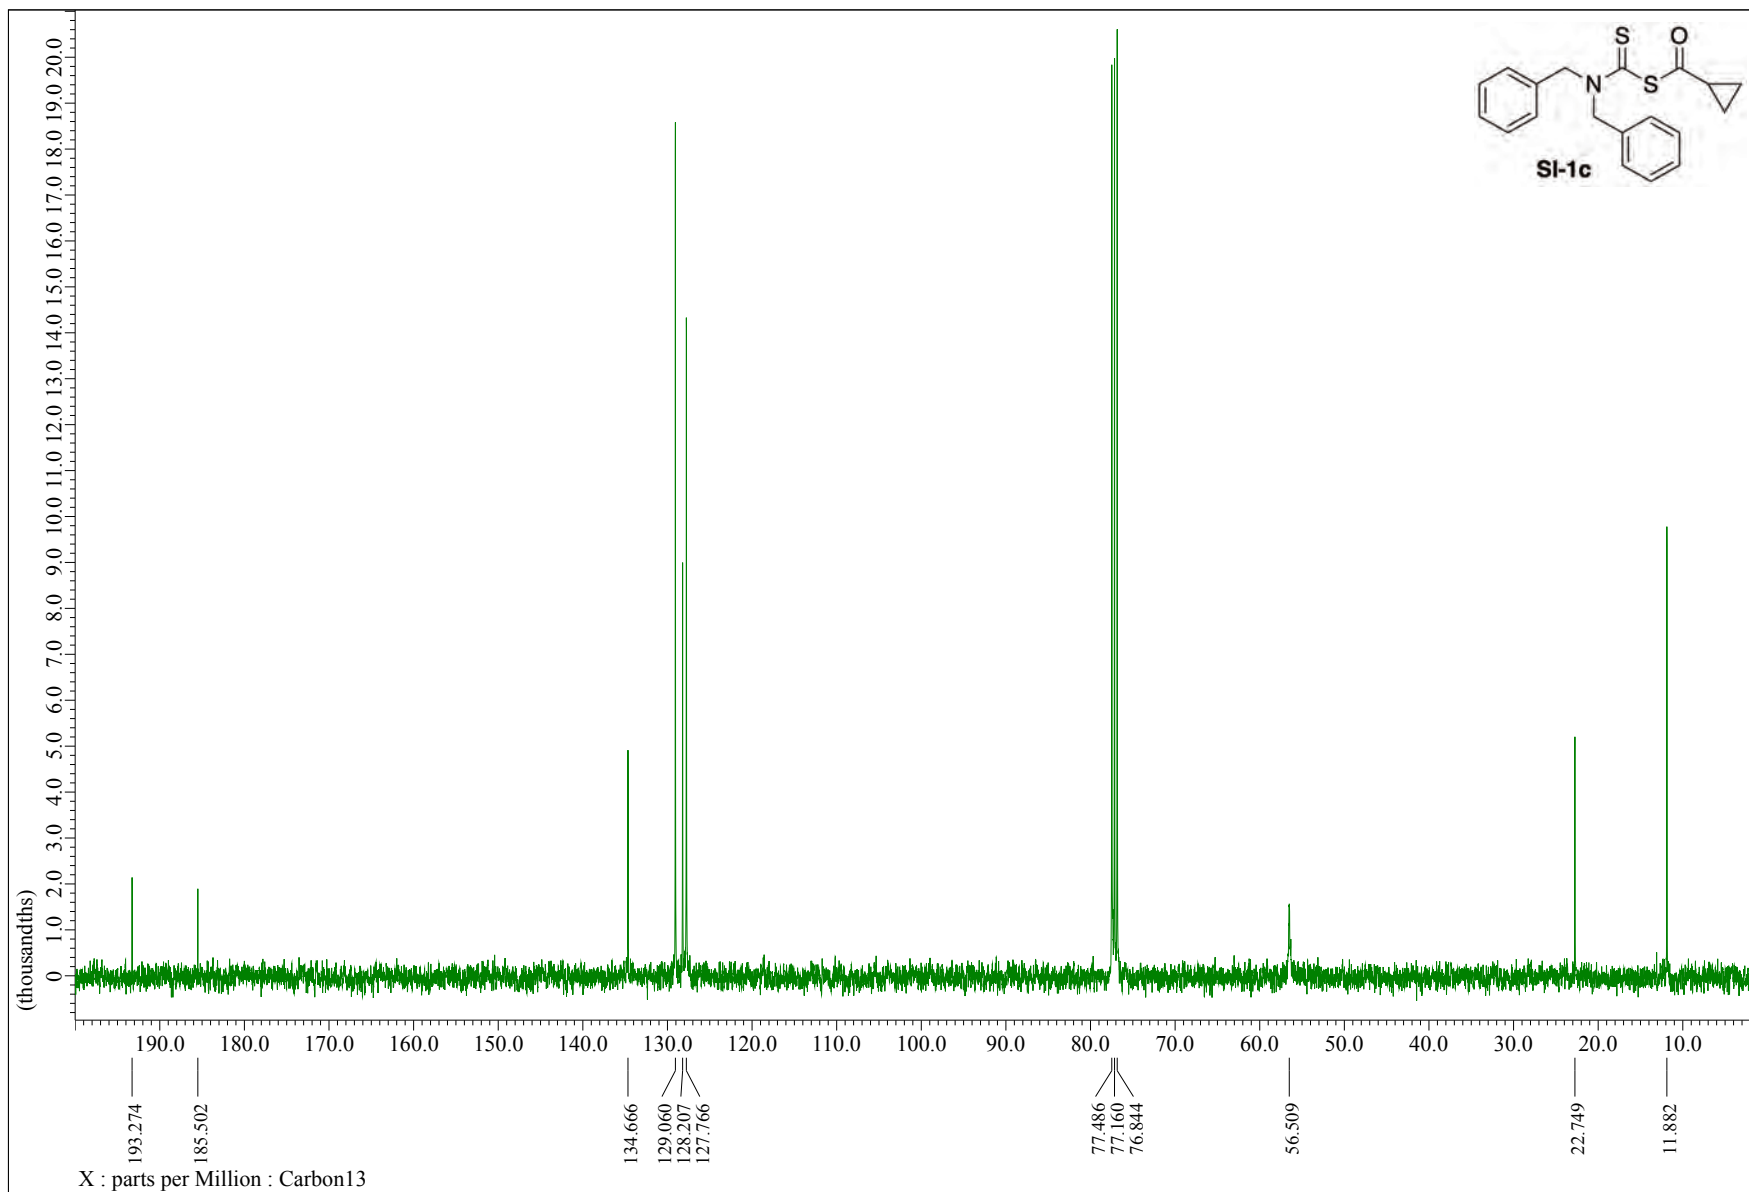

Sample No. : C:\Xcalibur\...BG\_231828\_KM\_06 \_ \_ 1

Instrument : Exactive Plus

Mobile phase solvent : MeOH

Operator name : hayashi harumi

Sample solvent : CHCl3

Date : 01/17/24 13:18:53

Instrumental method : C:\Xcalibur\methods\ESI\_100ul\S60\_100ul\_mz150\_2000pn.meth

Instrumental Analysis Division, Global Facility Center, Creative Research Institution, Hokkaido University

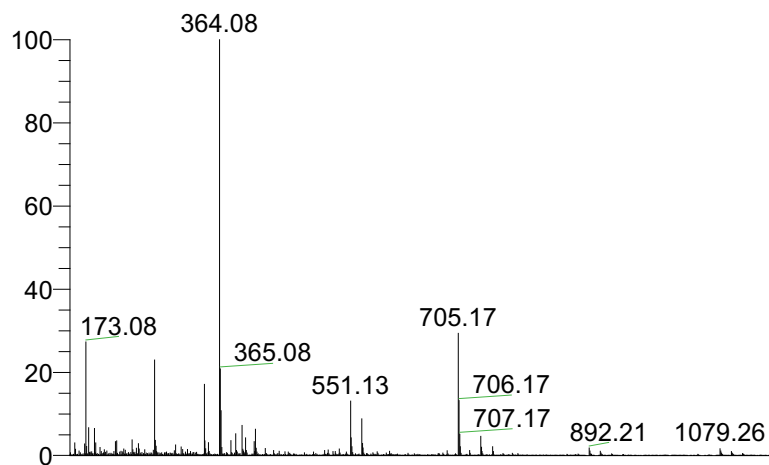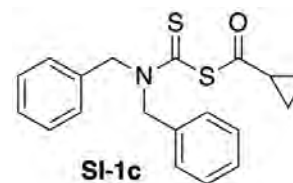

NL: 2.94E7  
BG\_231828\_KM\_0629\_  
B\_pn#18-31 RT:  
0.31-0.50 AV: 7 T:  
FTMS + c ESI Full ms  
[150.00-2000.00]

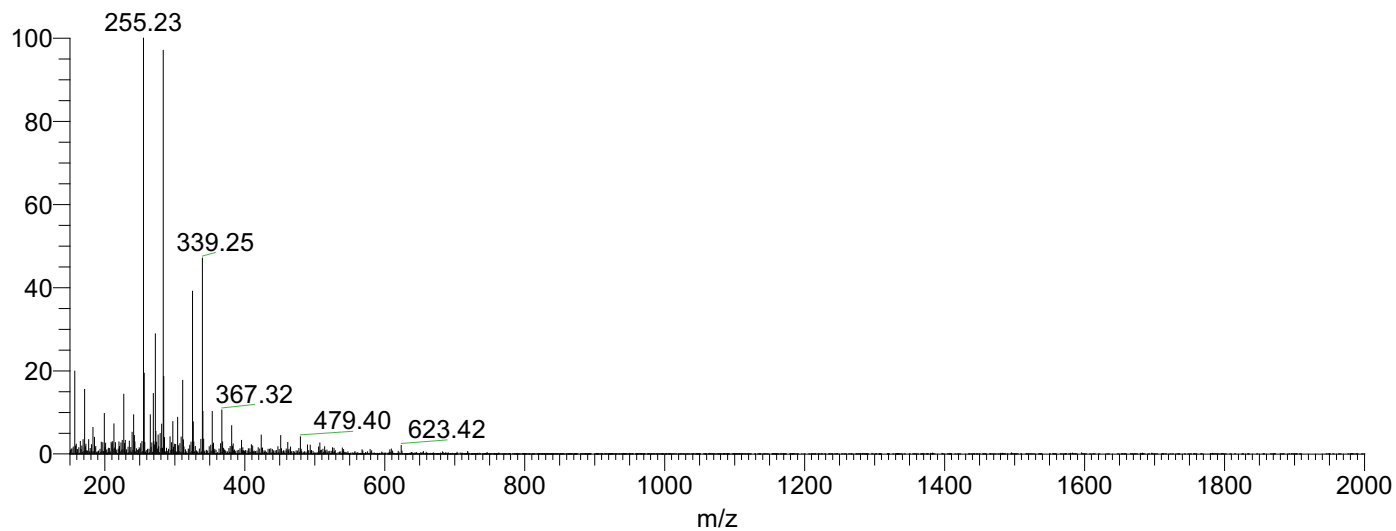

NL: 4.15E6  
BG\_231828\_KM\_0629\_  
B\_pn#18-31 RT:  
0.30-0.49 AV: 7 T:  
FTMS - c ESI Full ms  
[150.00-2000.00]

Sample No. : C:\Xcalibur\...10117\20170228\_KM\_0629\_B\_pn

Instrument : Exactive Plus

Mobile phase solvent : MeOH

Operator name : hayashi harumi

Sample solvent : CHCl3

Date : 01/17/24 10:27:35

Instrumental method : C:\Xcalibur\methods\ESI\_100ul\S60\_100ul\_mz150\_2000pn.meth

Instrumental Analysis Division, Global Facility Center, Creative Research Institution, Hokkaido University

231828\_KM\_0629\_B\_pn #21-25 RT: 0.35-0.41 AV: 3 NL: 9.03E6

T: FTMS + p ESI Full ms [150.0000-2000.0000]

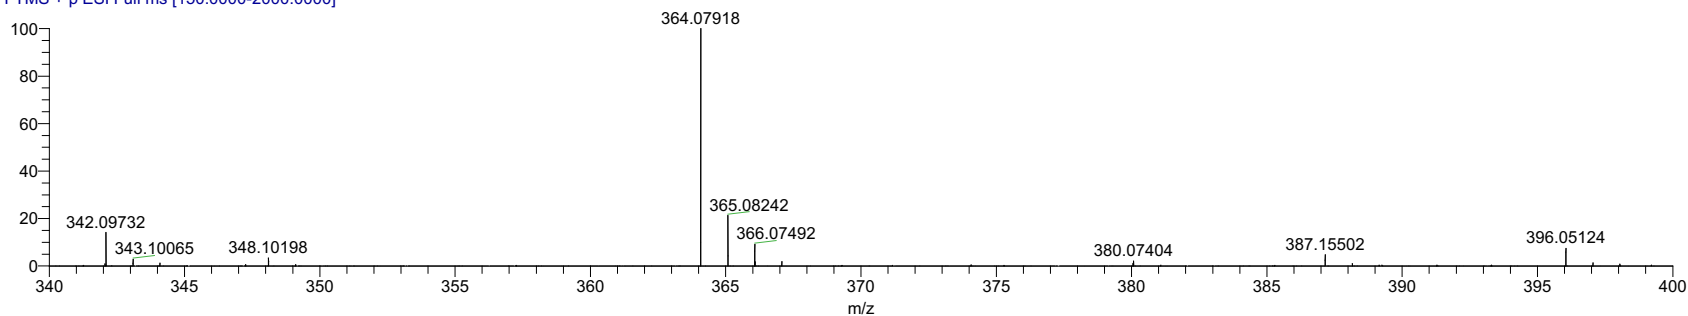

231828\_KM\_0629\_B\_pn #25-28 RT: 0.41-0.44 AV: 2 NL: 9.11E6

T: FTMS + p ESI Full ms [150.0000-2000.0000]

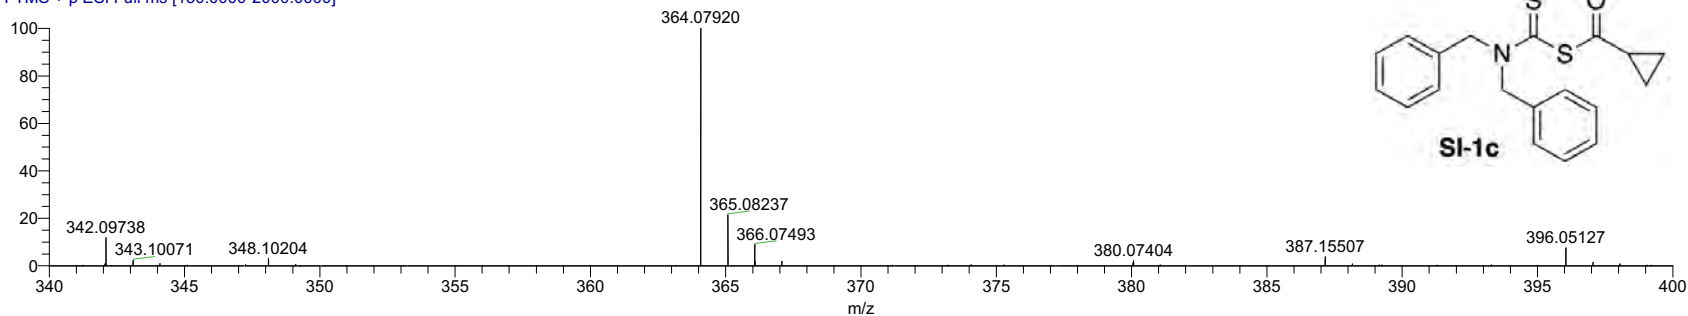

231828\_KM\_0629\_B\_pn #29-31 RT: 0.47-0.50 AV: 2 NL: 4.66E6

T: FTMS + p ESI Full ms [150.0000-2000.0000]

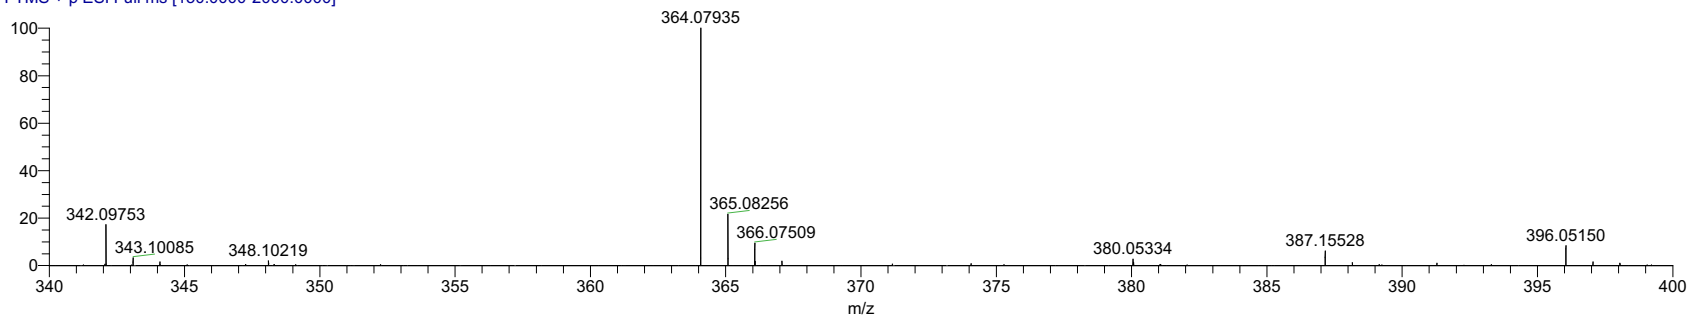

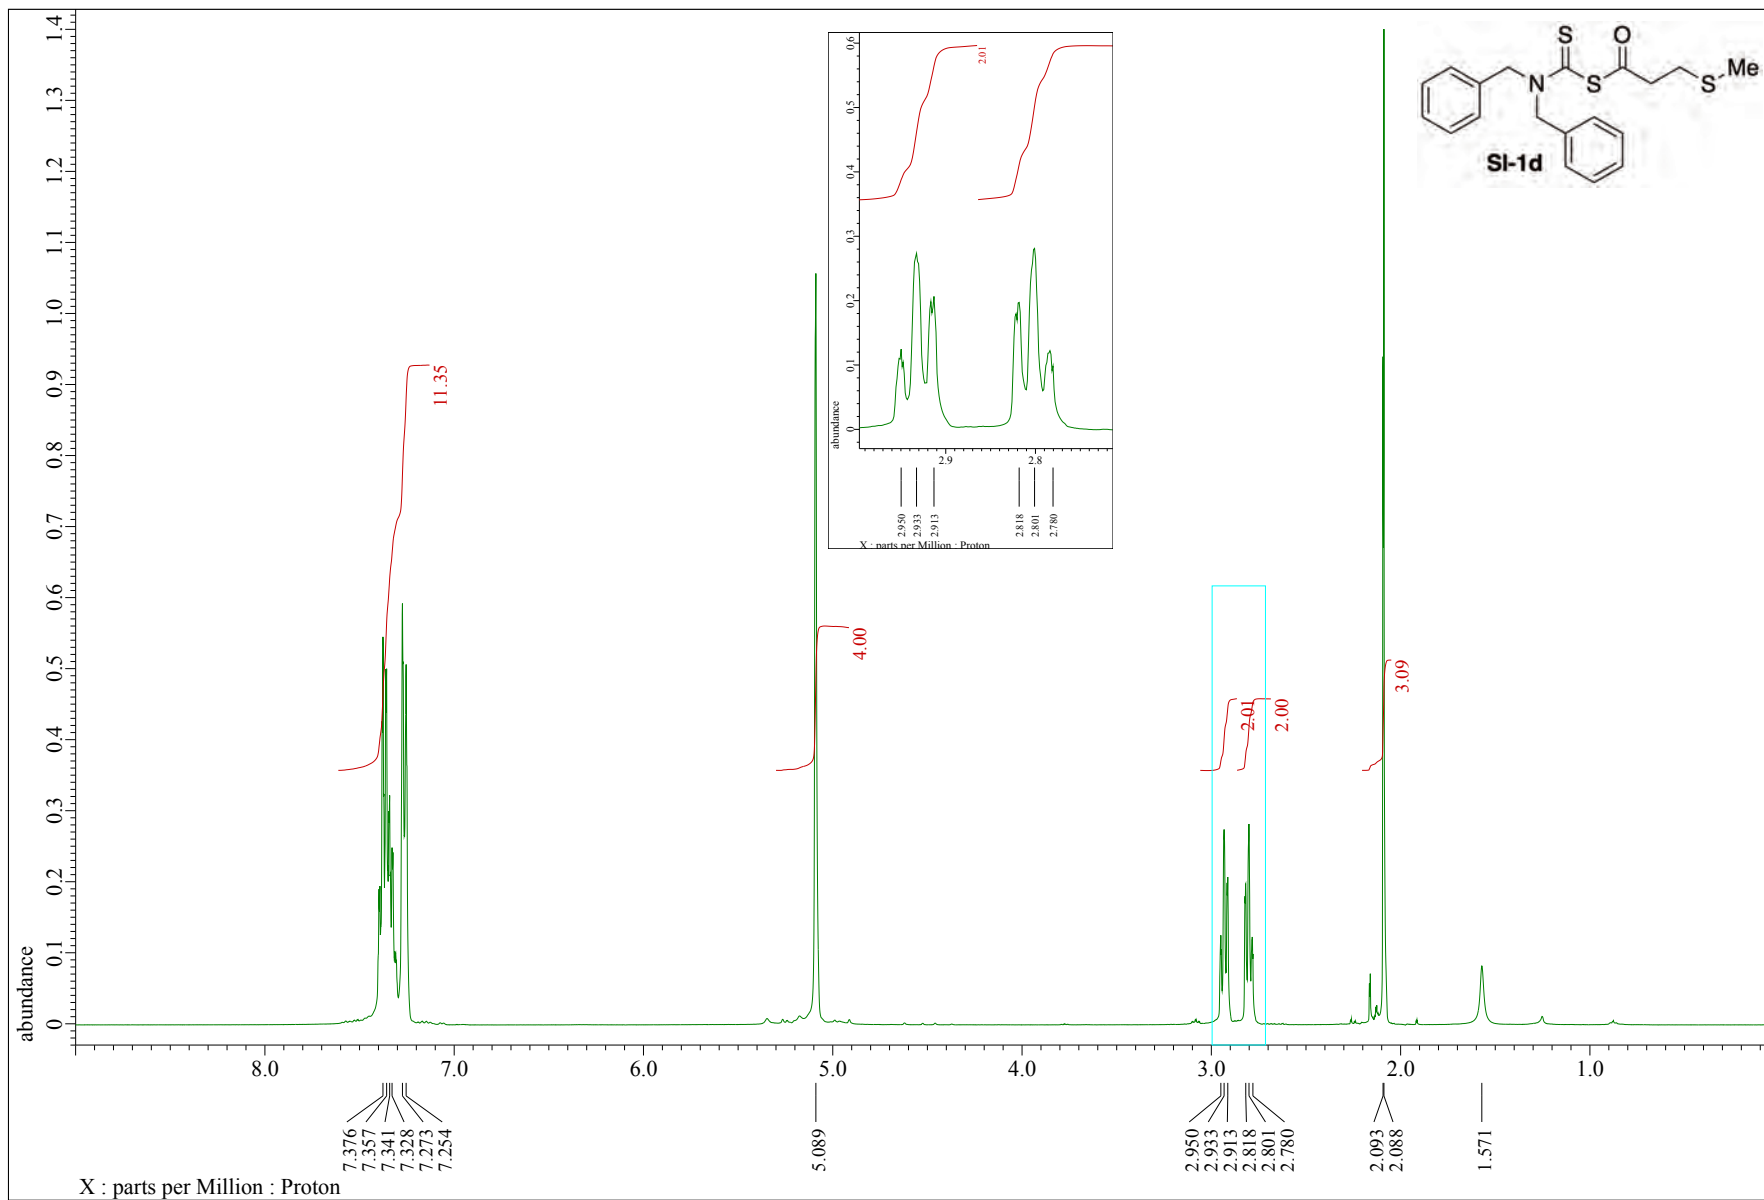

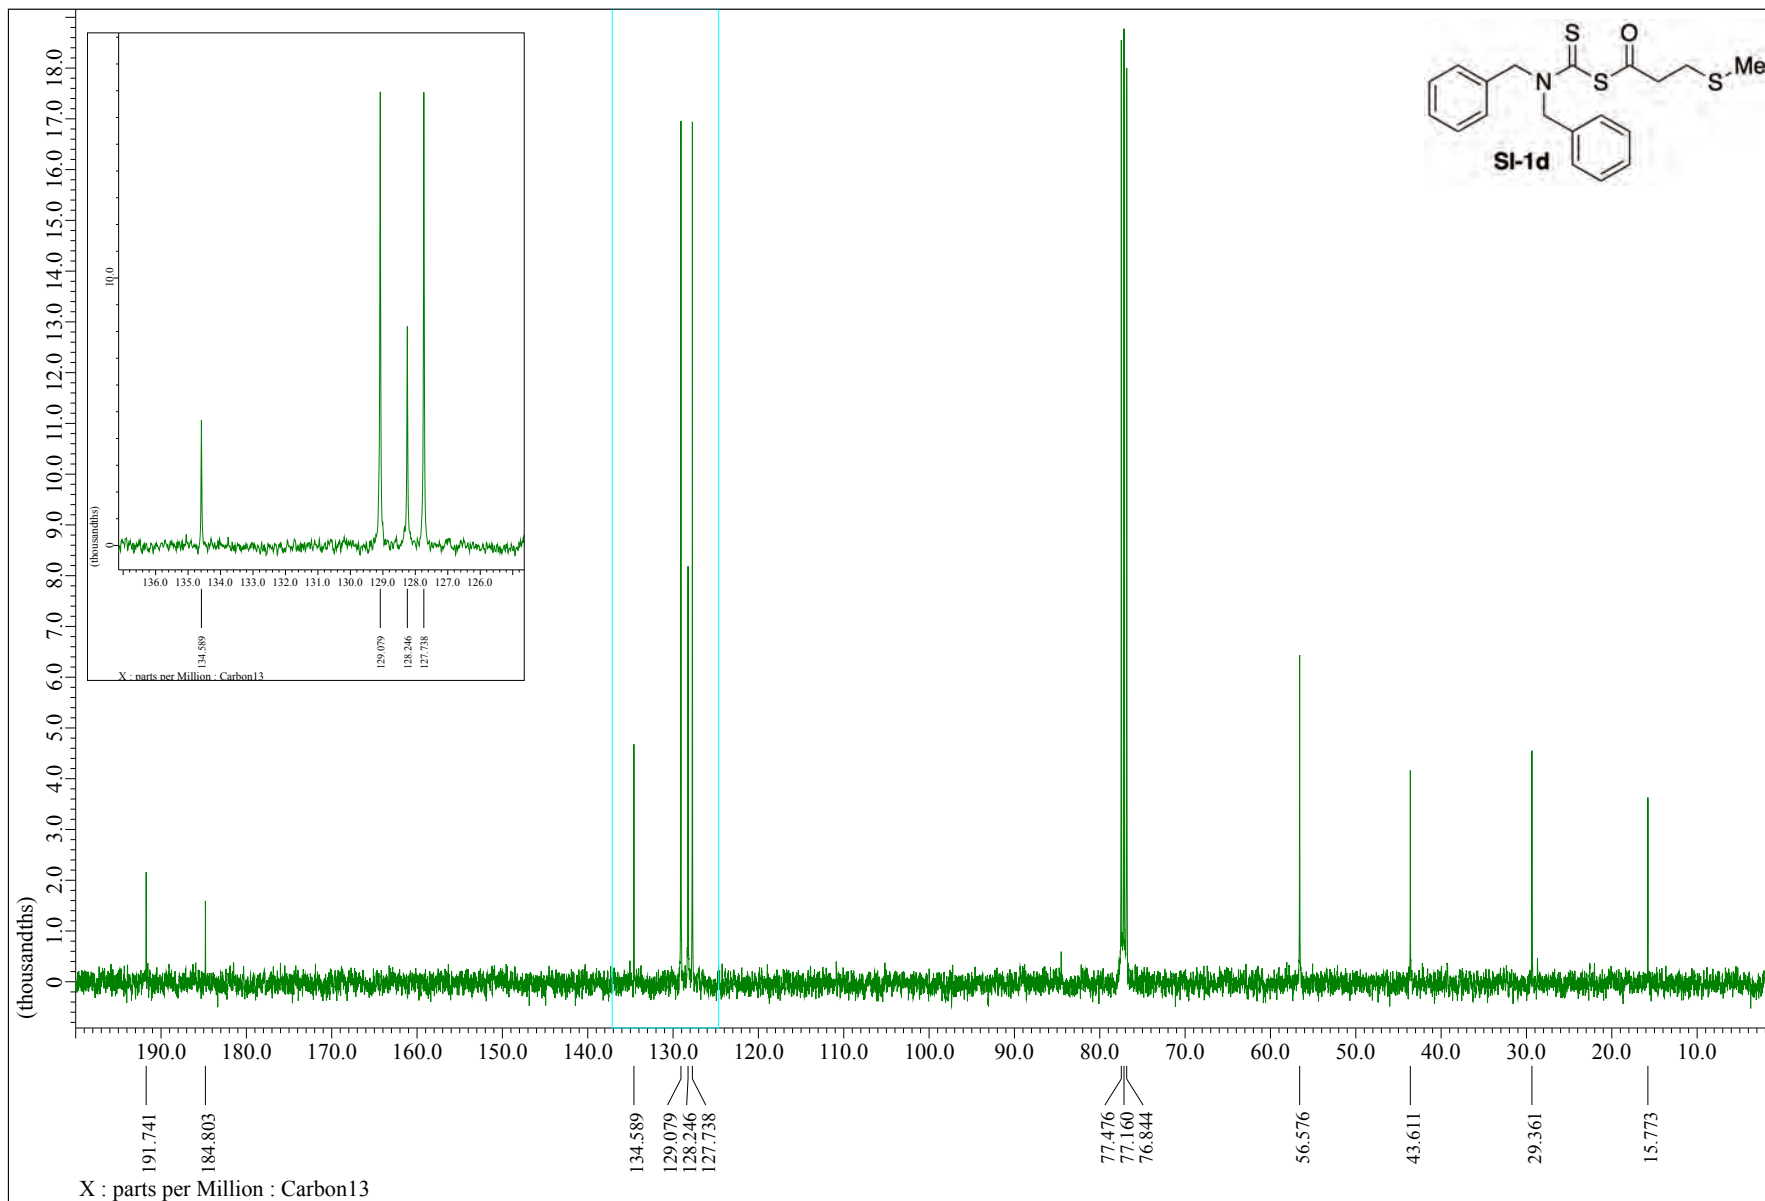

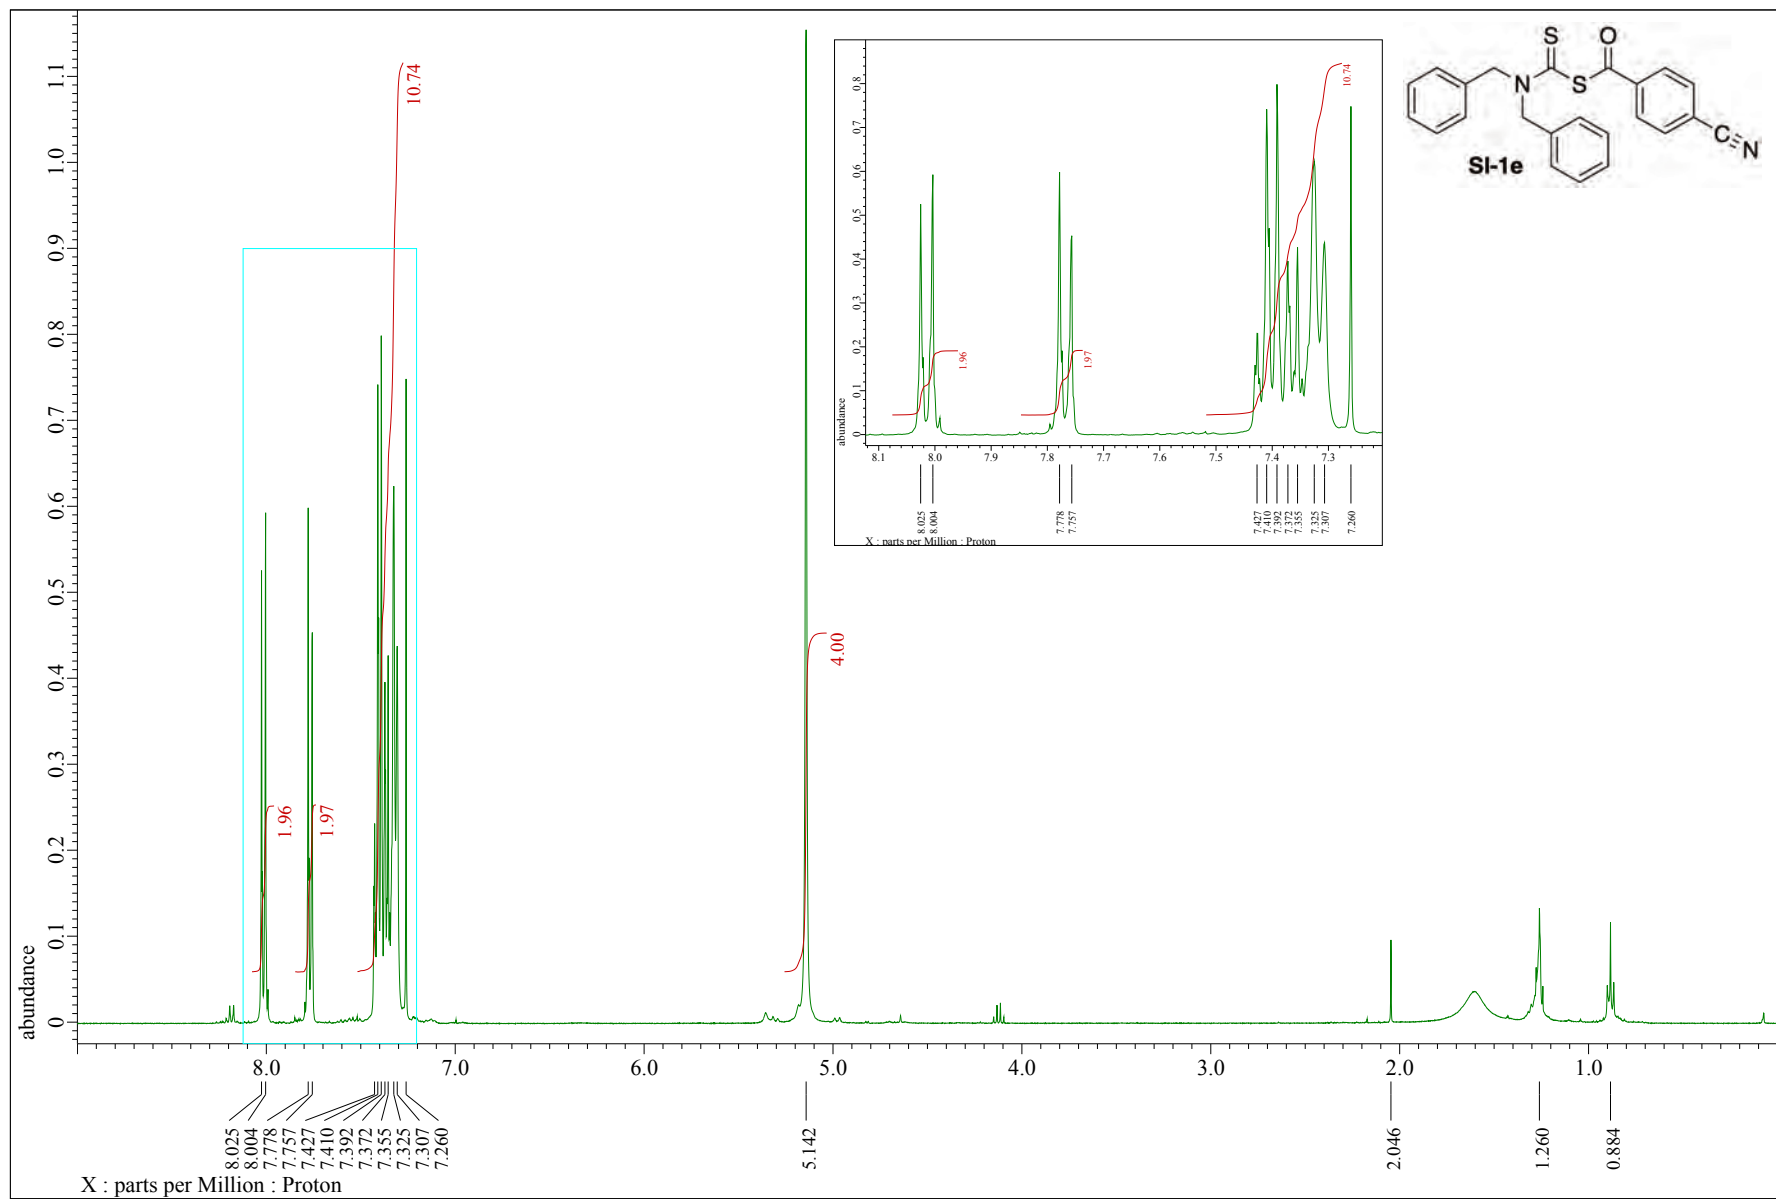

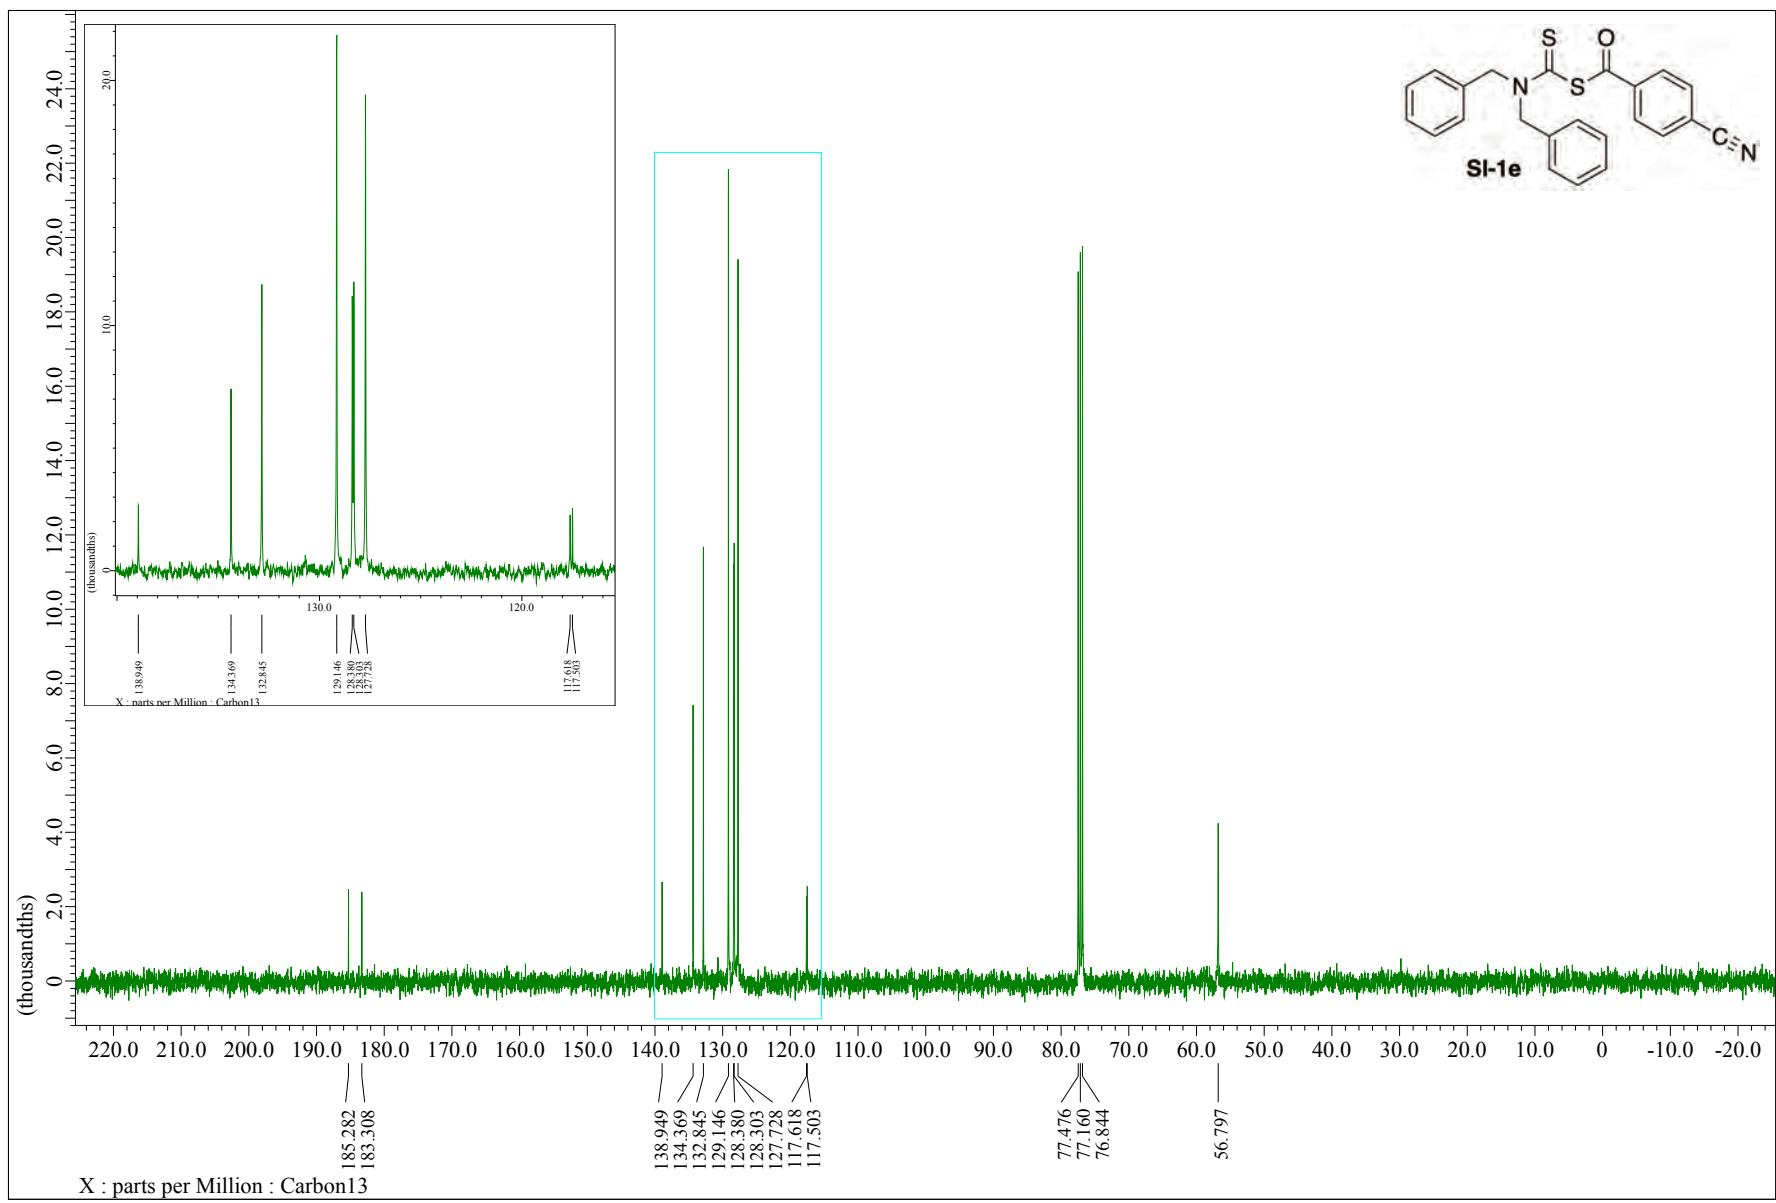

Sample No. : C:\Xcalibur\...BG\_231830\_KM\_06 \_ \_ 13

Instrument : Exactive Plus

Mobile phase solvent : MeOH

Operator name : hayashi harumi

Sample solvent : CHCl3

Date : 01/09/24 15:10:22

Instrumental method : C:\Xcalibur\methods\ESI\_100ul\S60\_100ul\_mz150\_2000pn.meth

Instrumental Analysis Division, Global Facility Center, Creative Research Institution, Hokkaido University

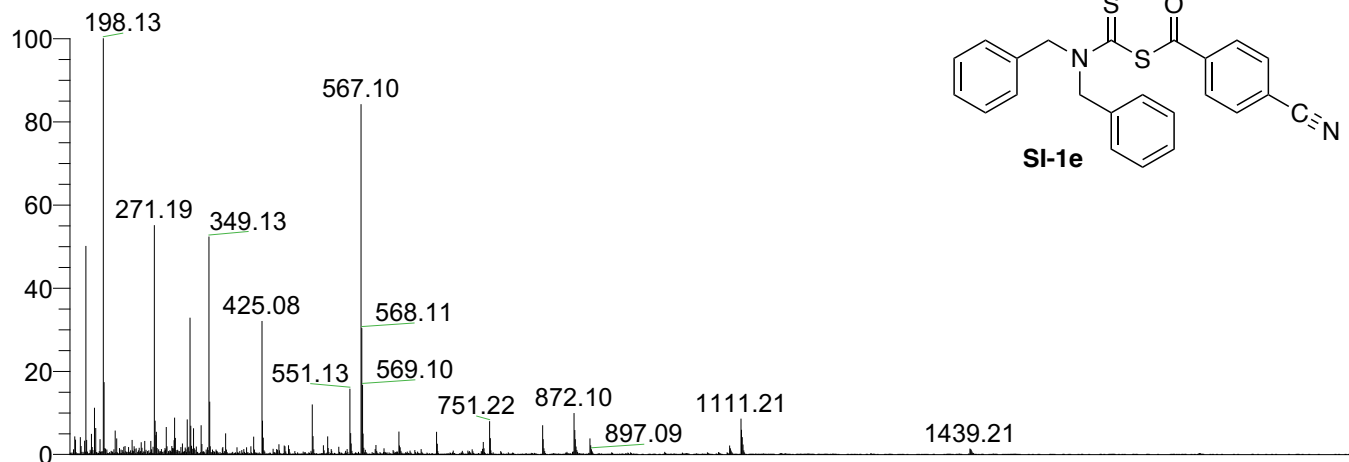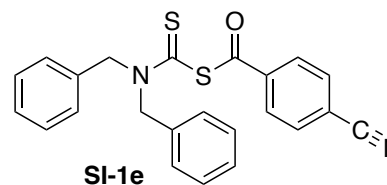

NL: 3.55E7  
BG\_231830\_KM\_0629\_  
A\_pn3#19-32 RT:  
0.31-0.48 AV: 7 T:  
FTMS + c ESI Full ms  
[150.00-2000.00]

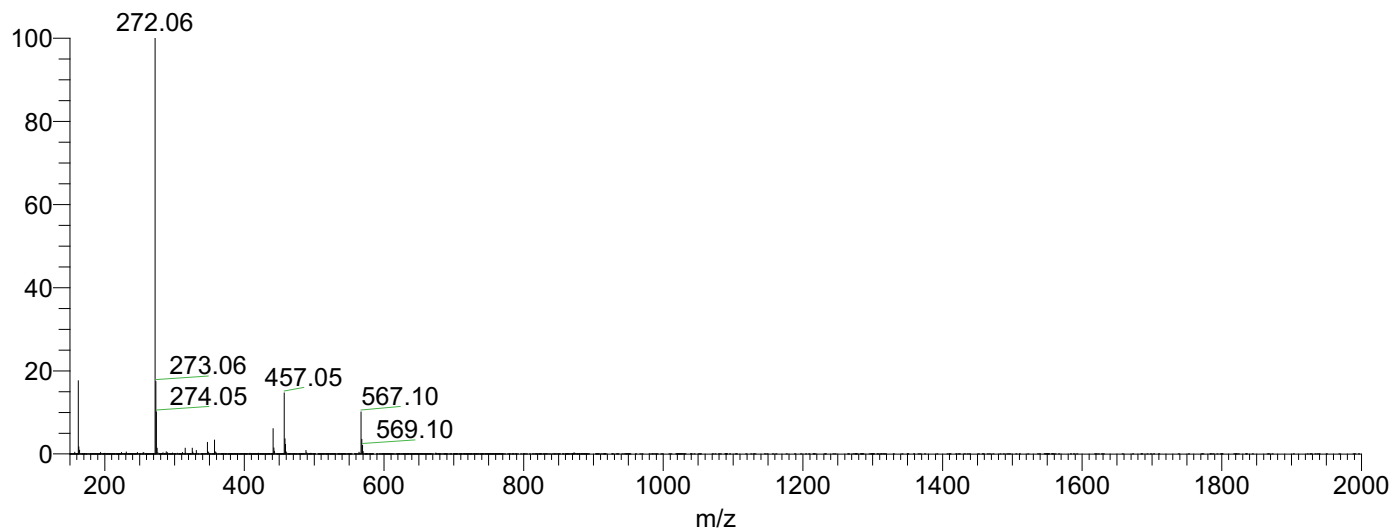

NL: 2.26E8  
BG\_231830\_KM\_0629\_  
A\_pn3#18-32 RT:  
0.29-0.50 AV: 8 T:  
FTMS - c ESI Full ms  
[150.00-2000.00]



Sample No. : C:\Xcalibur\...1231830...\_0629\_A\_pn3

Instrument : Exactive Plus

Mobile phase solvent : MeOH

Operator name : hayashi harumi

Sample solvent : CHCl3

Date : 01/09/24 14:59:25

Instrumental method : C:\Xcalibur\methods\ESI\_100ul\S60\_100ul\_mz150\_2000pn.meth

Instrumental Analysis Division, Global Facility Center, Creative Research Institution, Hokkaido University

231830\_KM\_0629\_A\_pn3 #22-25 RT: 0.37-0.39 AV: 2 NL: 3.54E6

T: FTMS + p ESI Full ms [150.0000-2000.0000]

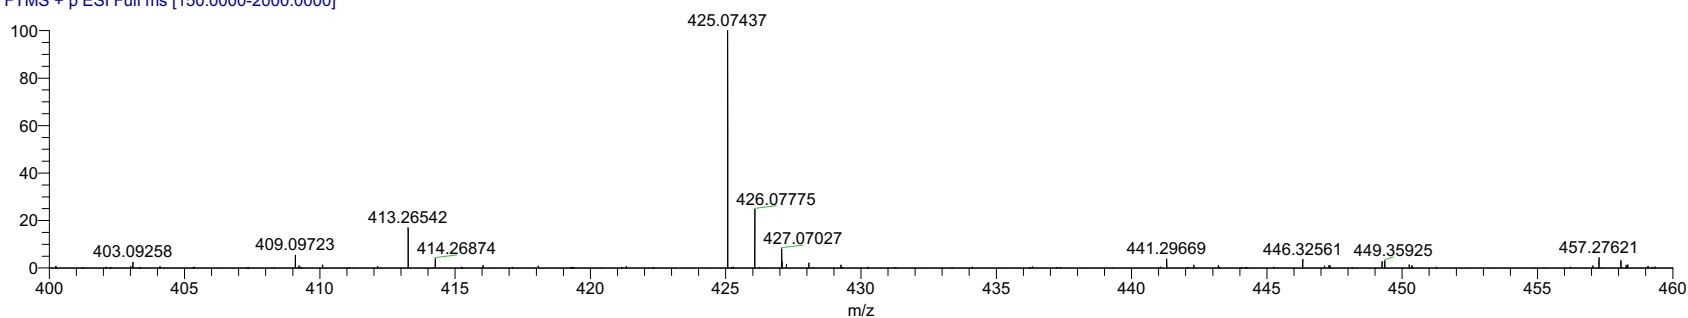

231830\_KM\_0629\_A\_pn3 #26-29 RT: 0.42-0.45 AV: 2 NL: 3.15E6

T: FTMS + p ESI Full ms [150.0000-2000.0000]

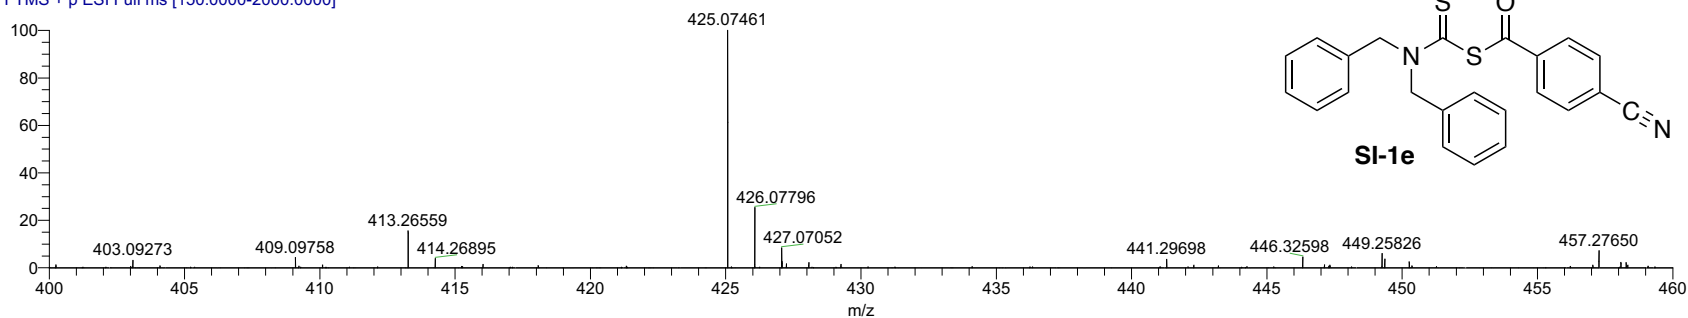

231830\_KM\_0629\_A\_pn3 #30-33 RT: 0.48-0.51 AV: 2 NL: 1.66E6

T: FTMS + p ESI Full ms [150.0000-2000.0000]

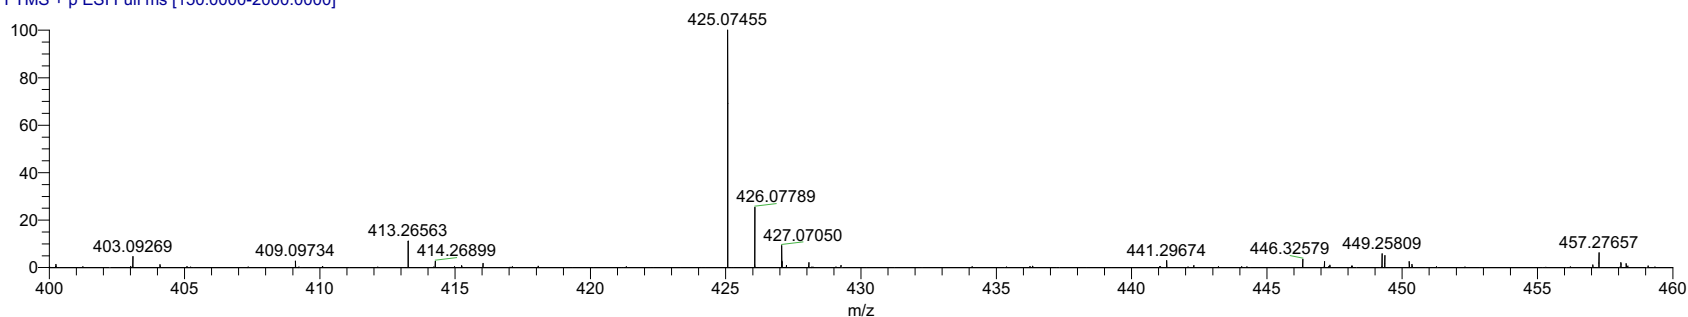

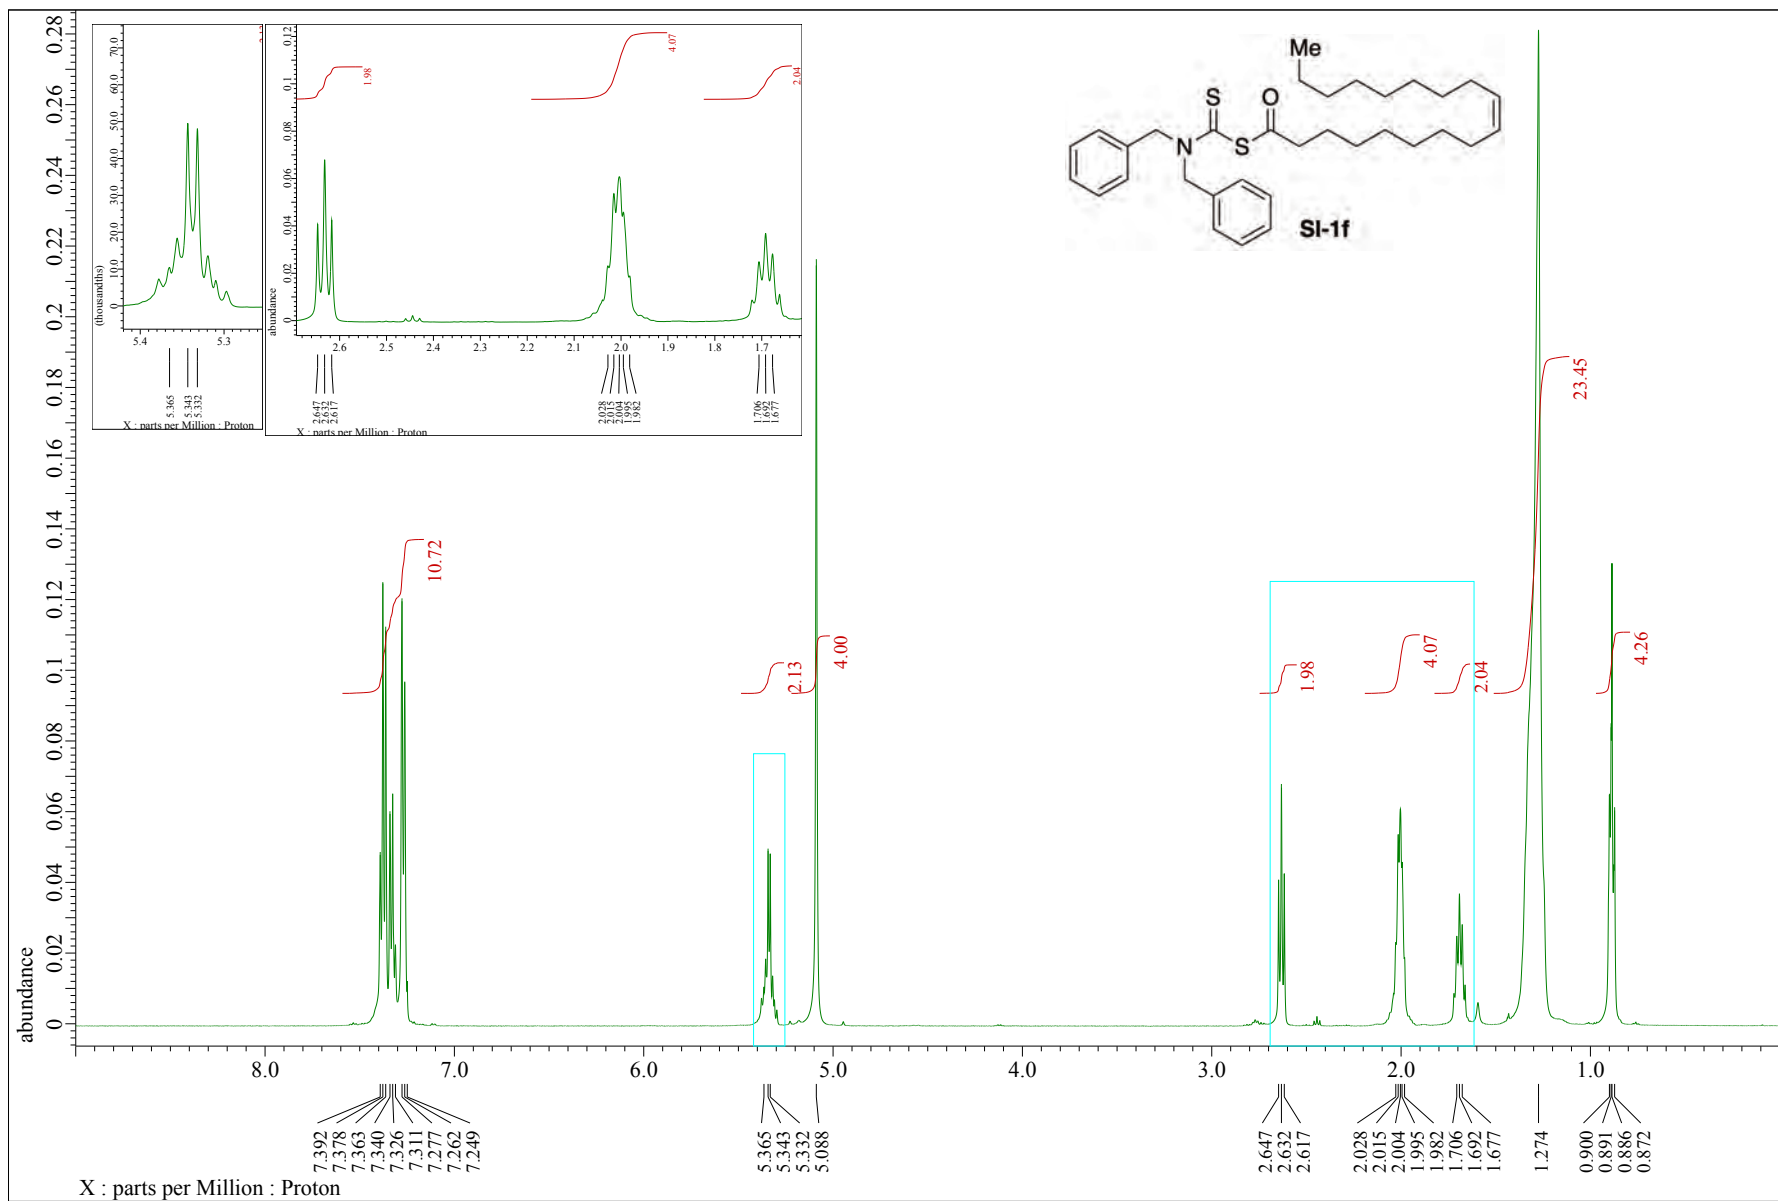

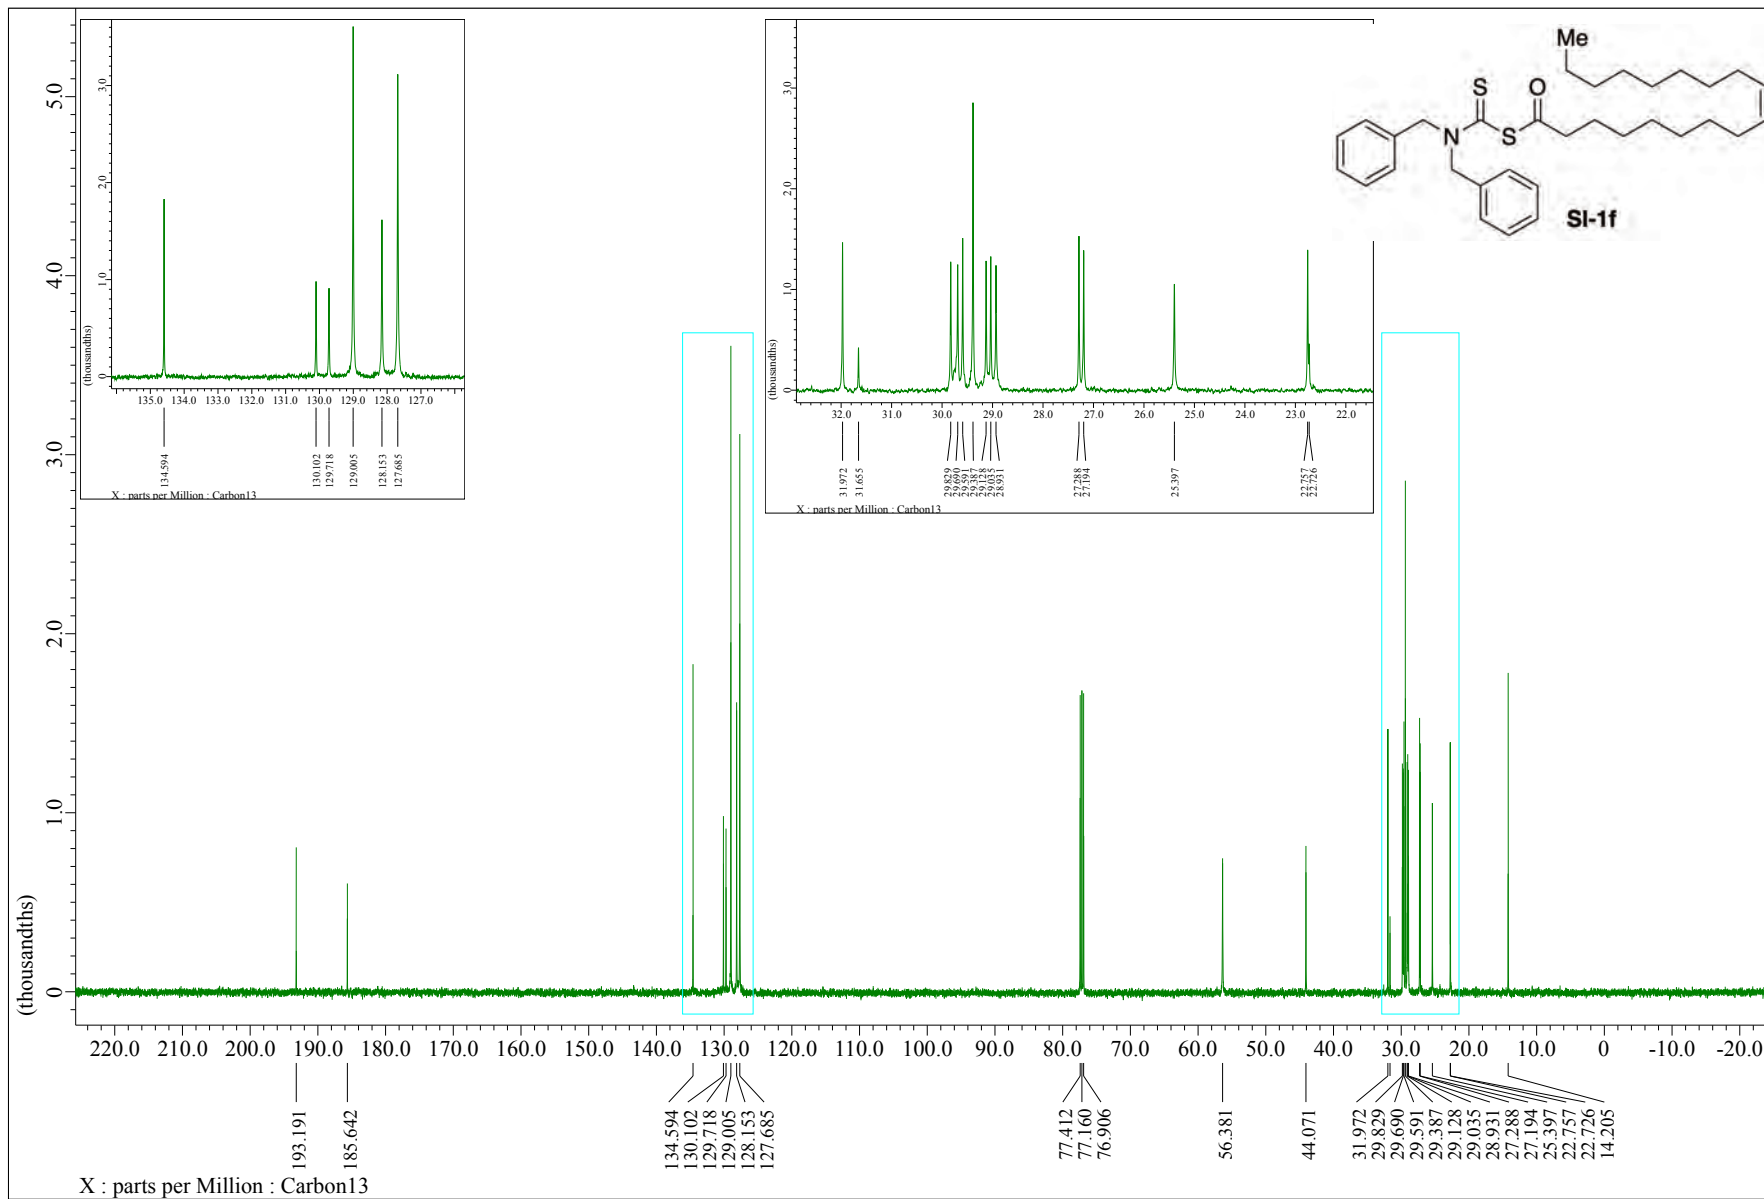

Sample No. : C:\Xcalibur\...BG\_231831\_KM\_06 \_ \_ i2

Instrument : Exactive Plus

Mobile phase solvent : MeOH

Operator name : hayashi harumi

Sample solvent : CHCl3

Date : 01/17/24 13:21:51

Instrumental method : C:\Xcalibur\methods\ESI\_100ul\S60\_100ul\_mz150\_2000pn.meth

Instrumental Analysis Division, Global Facility Center, Creative Research Institution, Hokkaido University

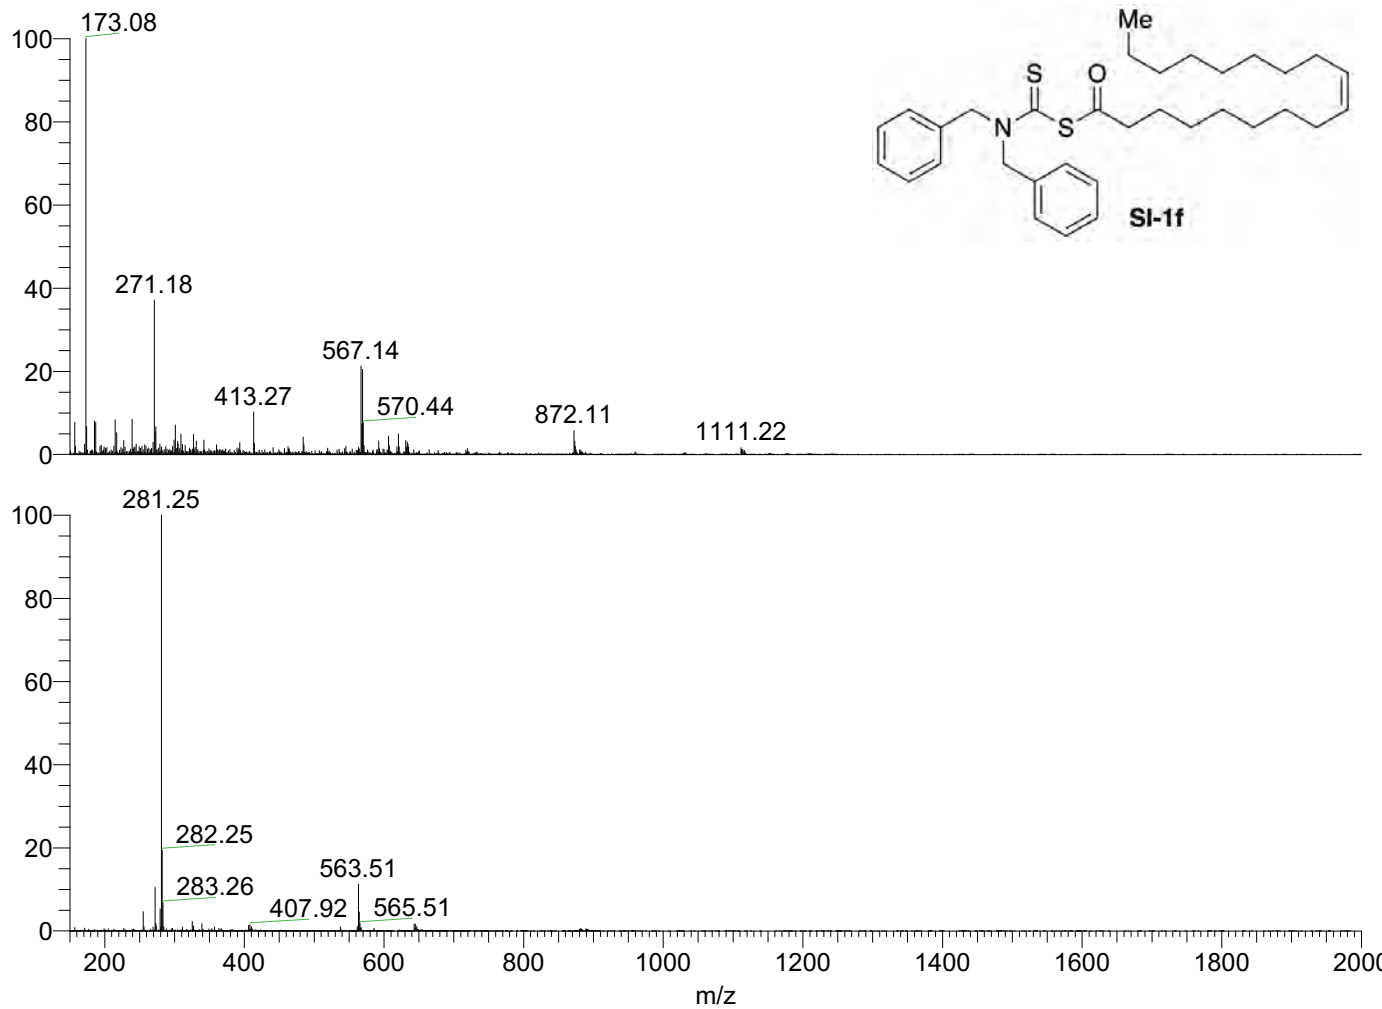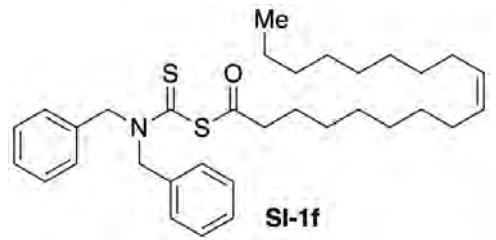

NL: 4.33E7  
BG\_231831\_KM\_0630\_  
B\_pn2#18-32 RT:  
0.31-0.49 AV: 7 T:  
FTMS + c ESI Full ms  
[150.00-2000.00]

NL: 1.66E8  
BG\_231831\_KM\_0630\_  
B\_pn2#18-32 RT:  
0.30-0.50 AV: 8 T:  
FTMS - c ESI Full ms  
[150.00-2000.00]

Sample No. : C:\Xcalibur\...1231831\_KM\_0630\_B\_pn2

Instrument : Exactive Plus

Mobile phase solvent : MeOH

Operator name : hayashi harumi

Sample solvent : CHCl3

Date : 01/17/24 11:20:00

Instrumental method : C:\Xcalibur\methods\ESI\_100ul\S60\_100ul\_mz150\_2000pn.meth

Instrumental Analysis Division, Global Facility Center, Creative Research Institution, Hokkaido University

231831\_KM\_0630\_B\_pn2 #18-22 RT: 0.31-0.34 AV: 2 NL: 5.00E4

T: FTMS + p ESI Full ms [150.0000-2000.0000]

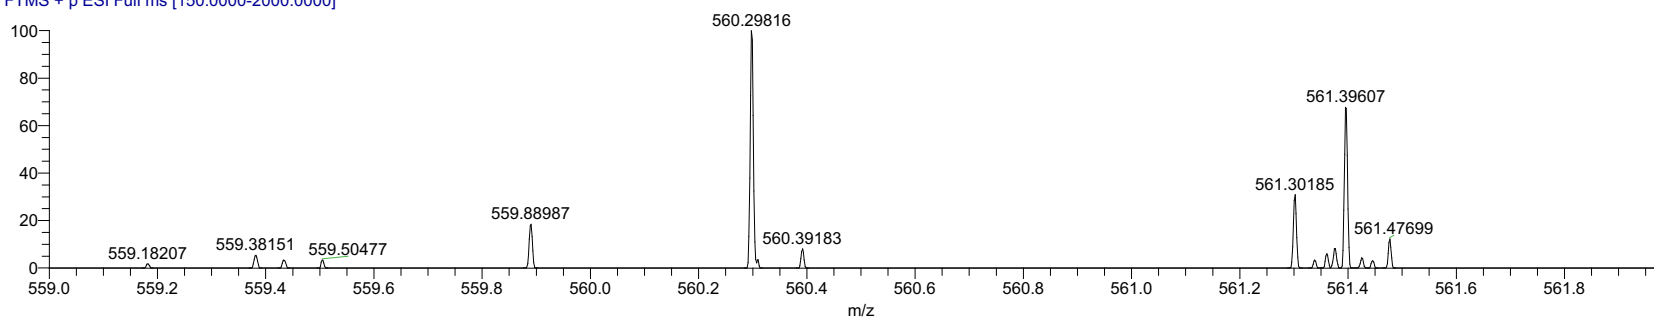

231831\_KM\_0630\_B\_pn2 #22-25 RT: 0.37-0.40 AV: 2 NL: 1.23E5

T: FTMS + p ESI Full ms [150.0000-2000.0000]

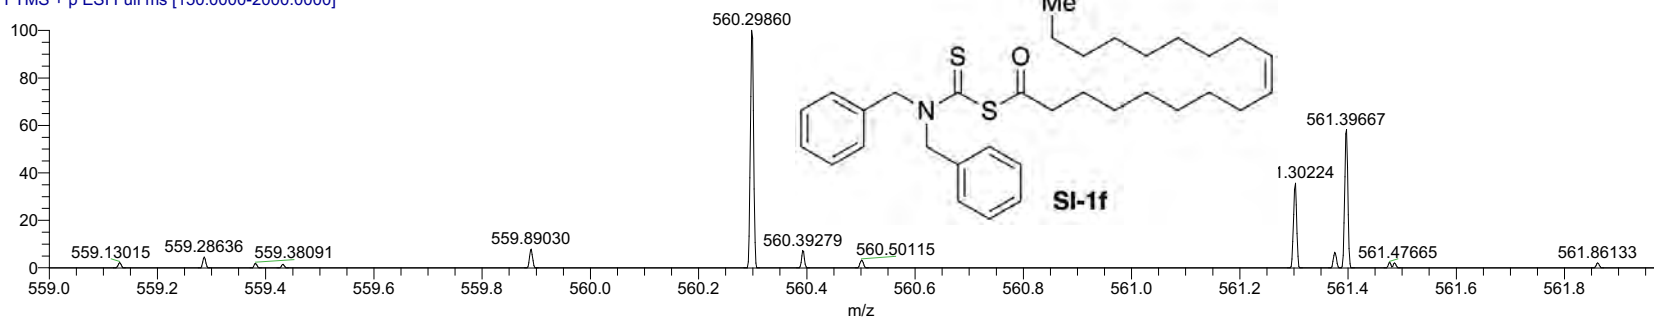

231831\_KM\_0630\_B\_pn2 #25-29 RT: 0.40-0.46 AV: 3 NL: 9.96E4

T: FTMS + p ESI Full ms [150.0000-2000.0000]

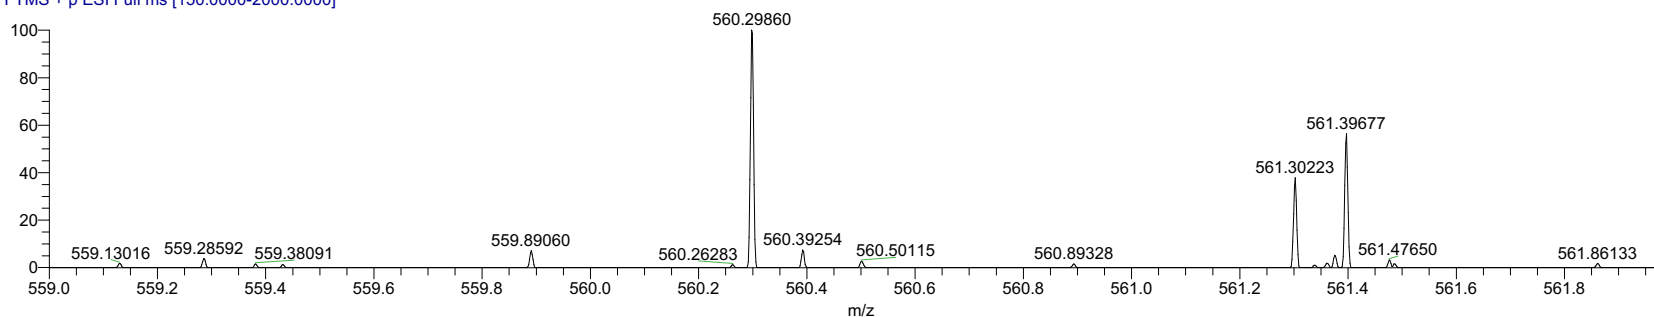

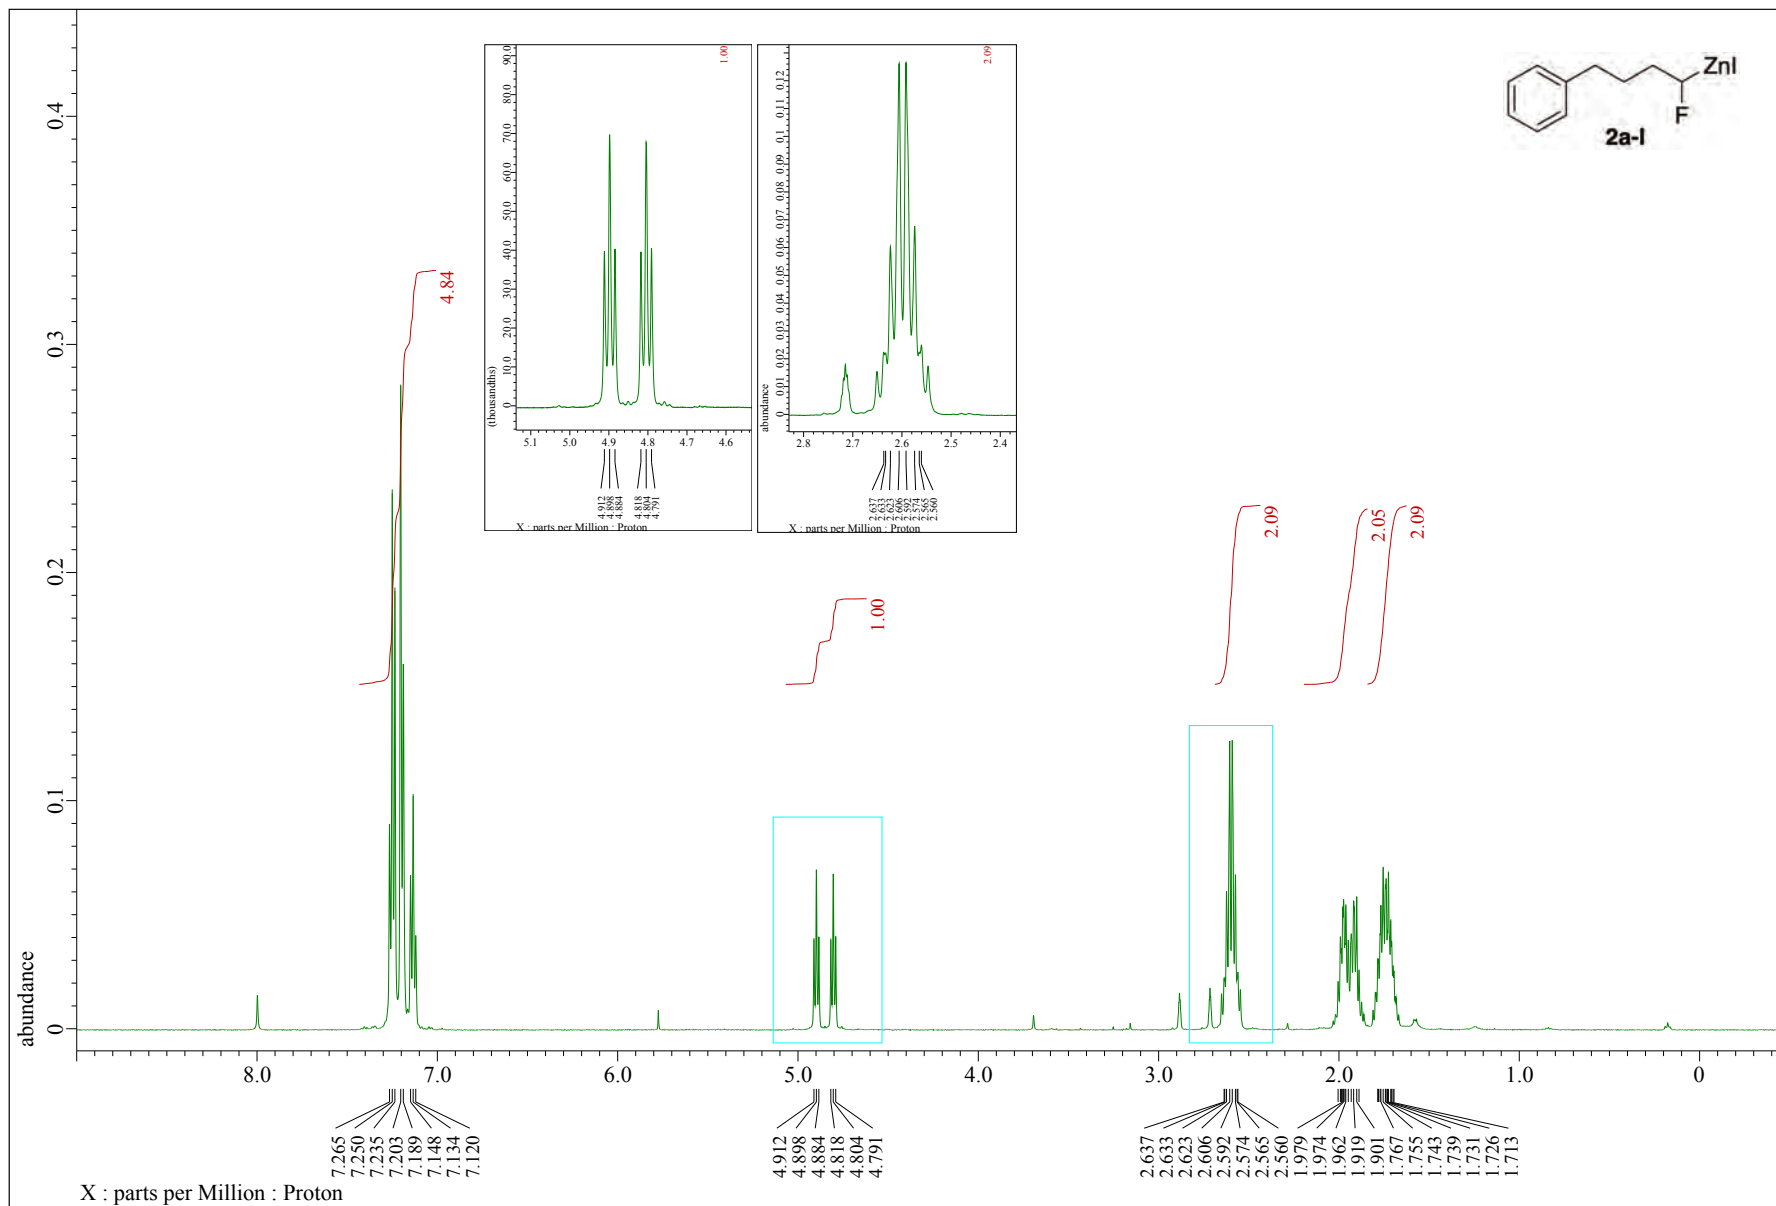

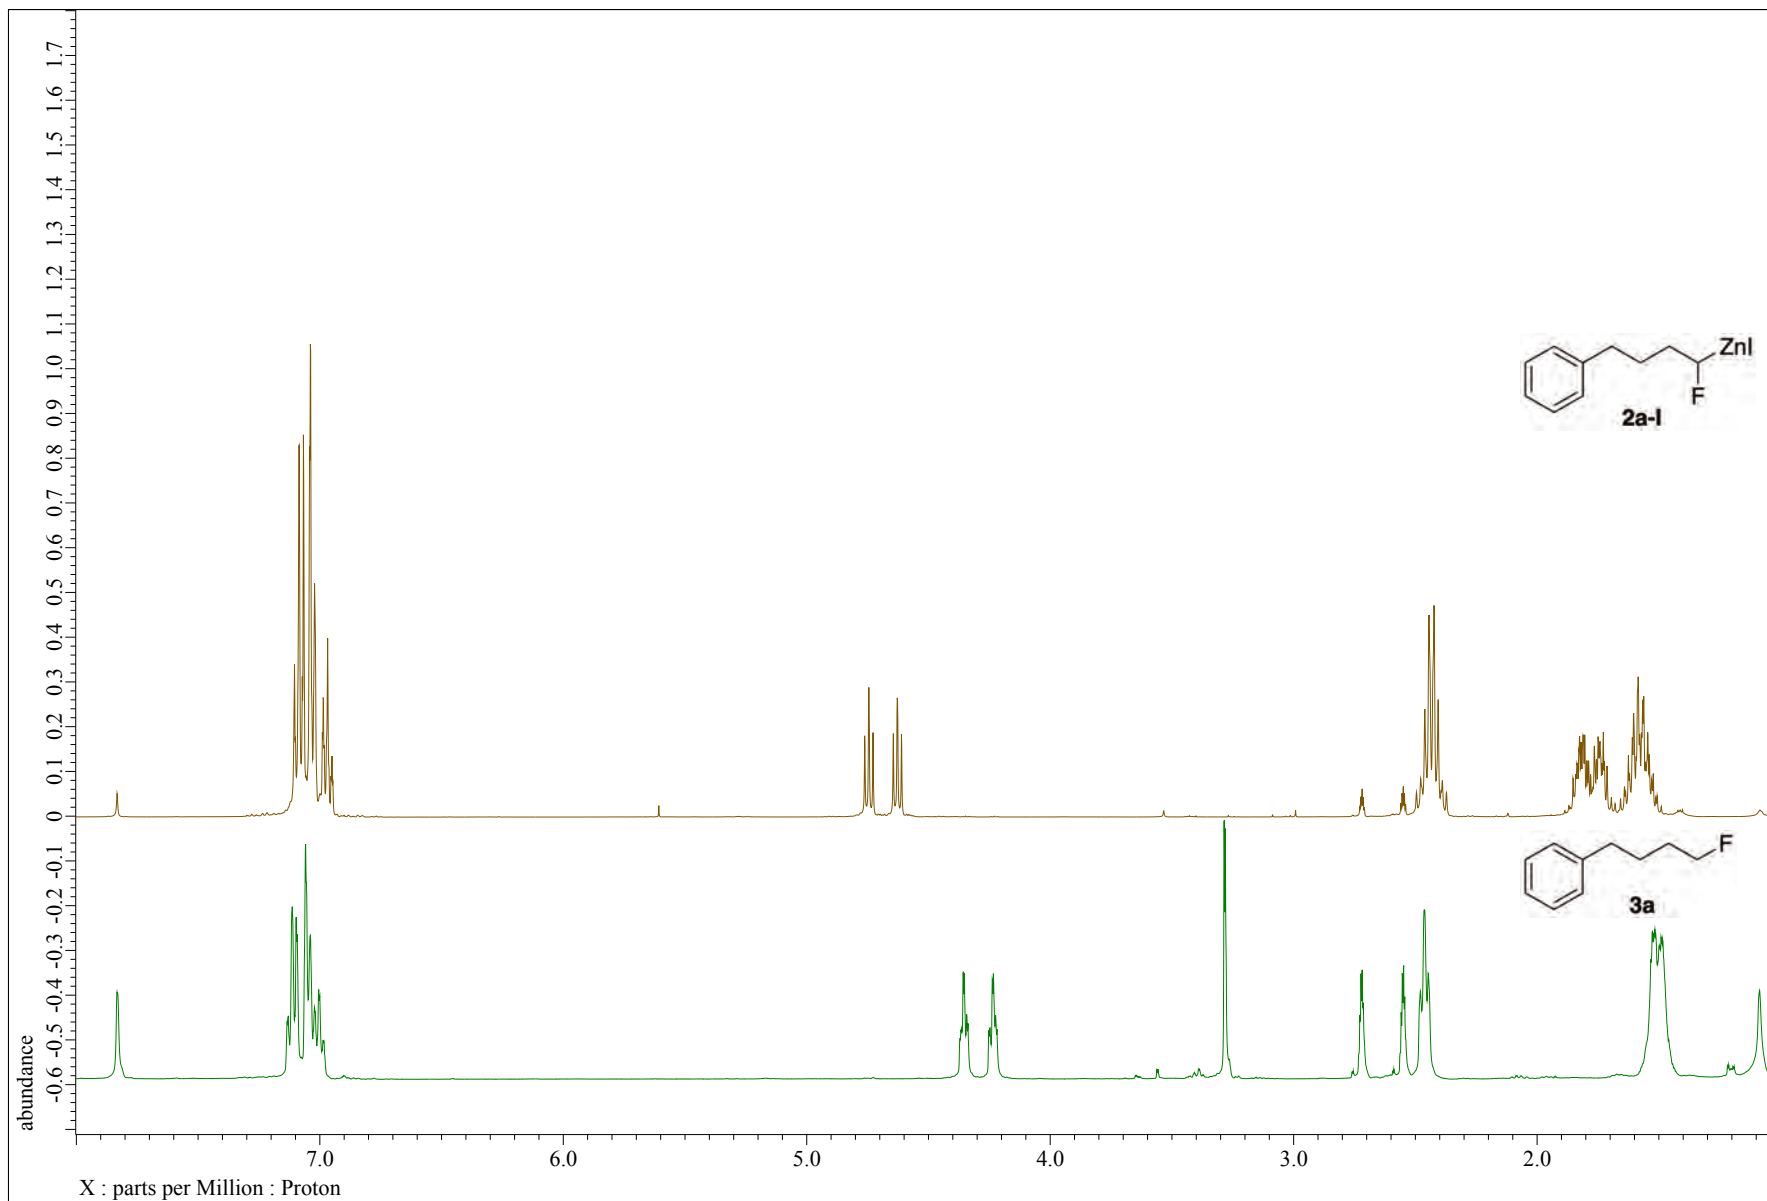

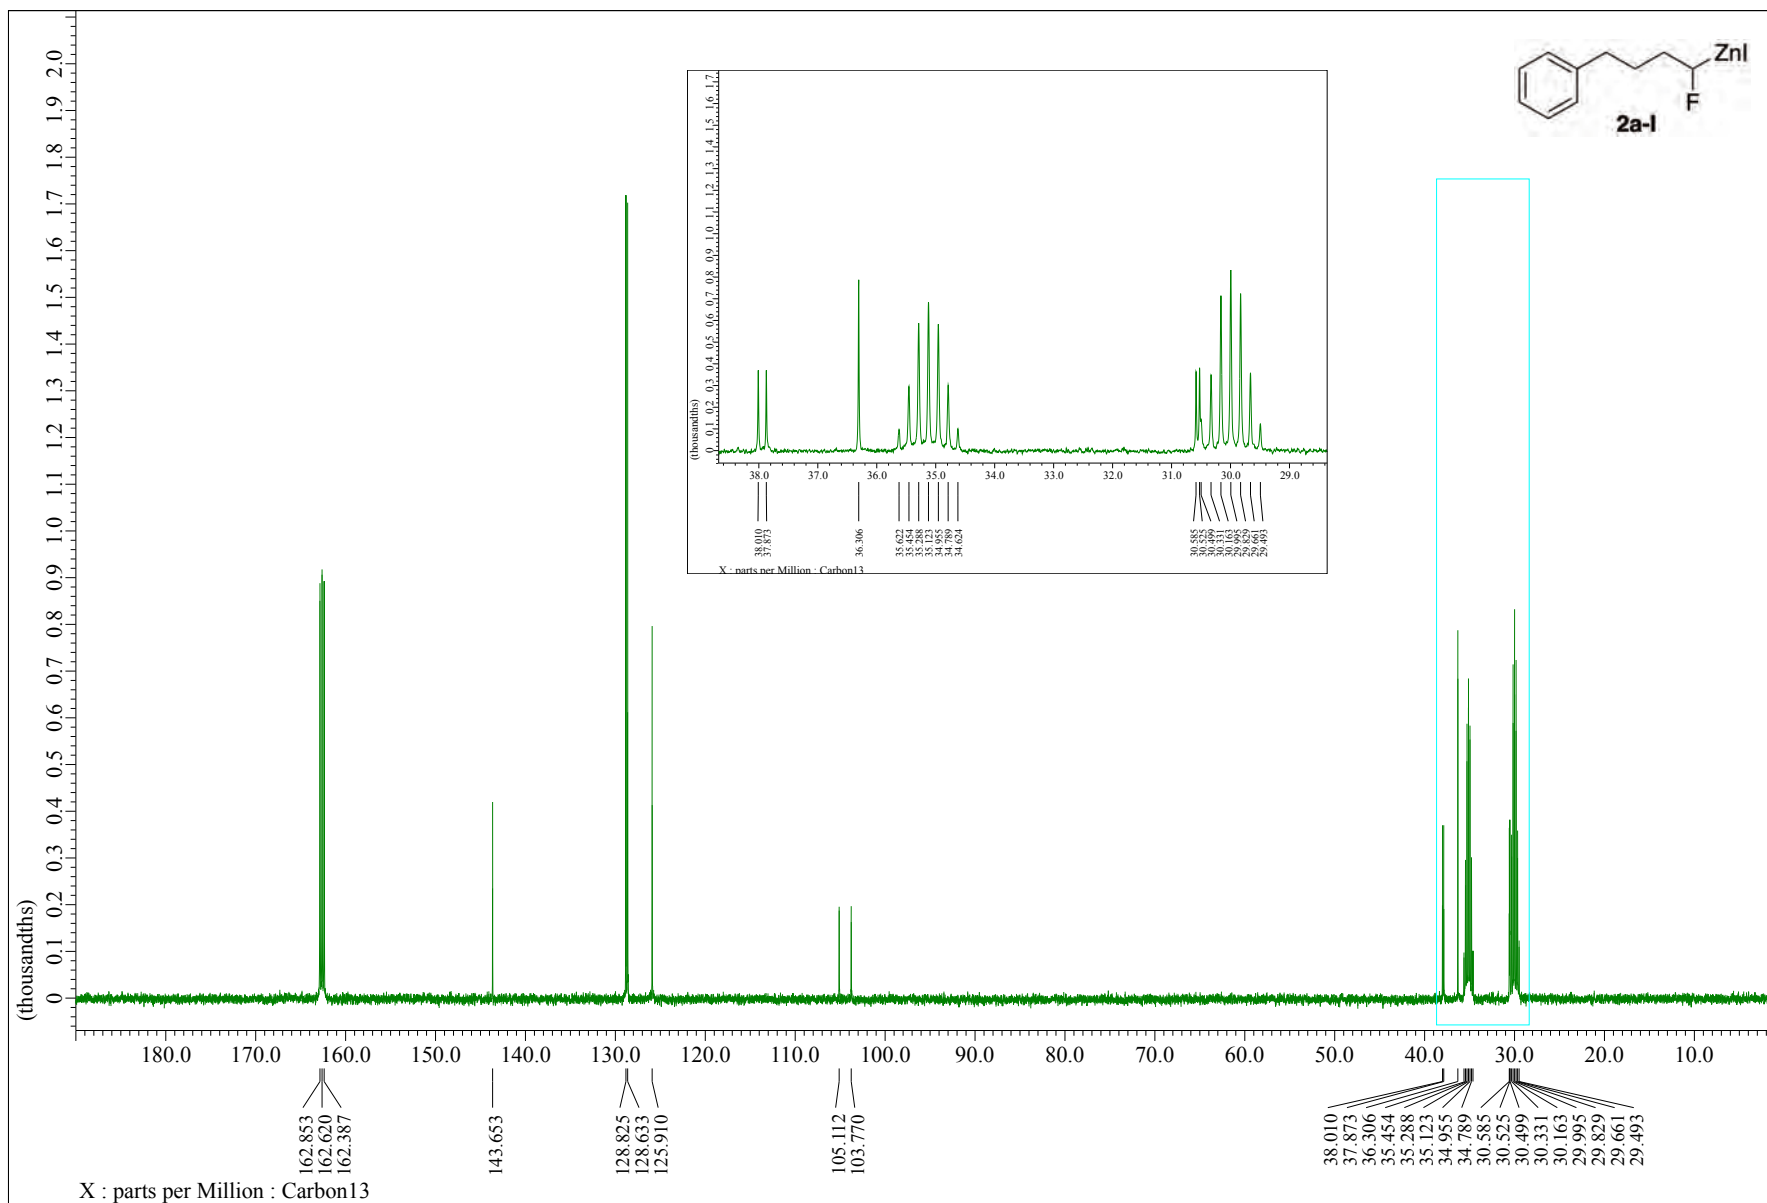



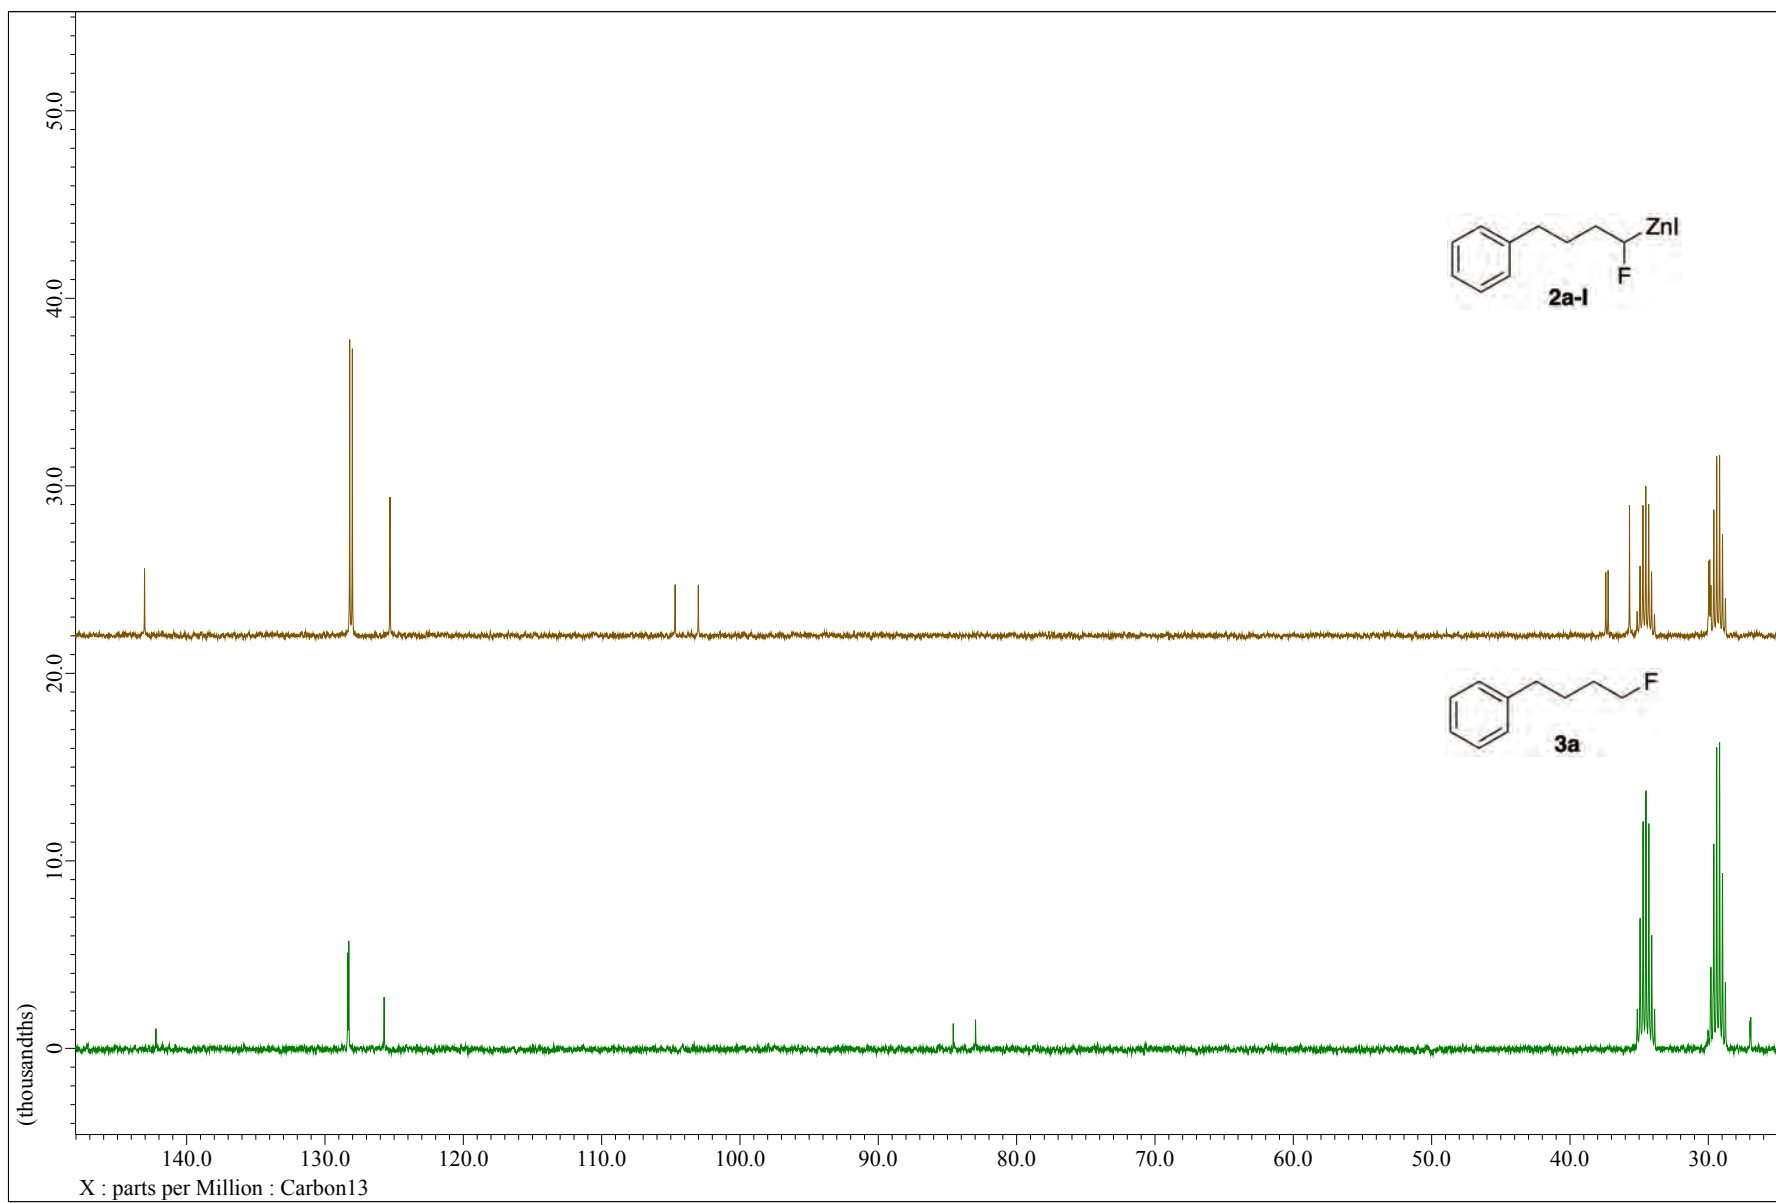

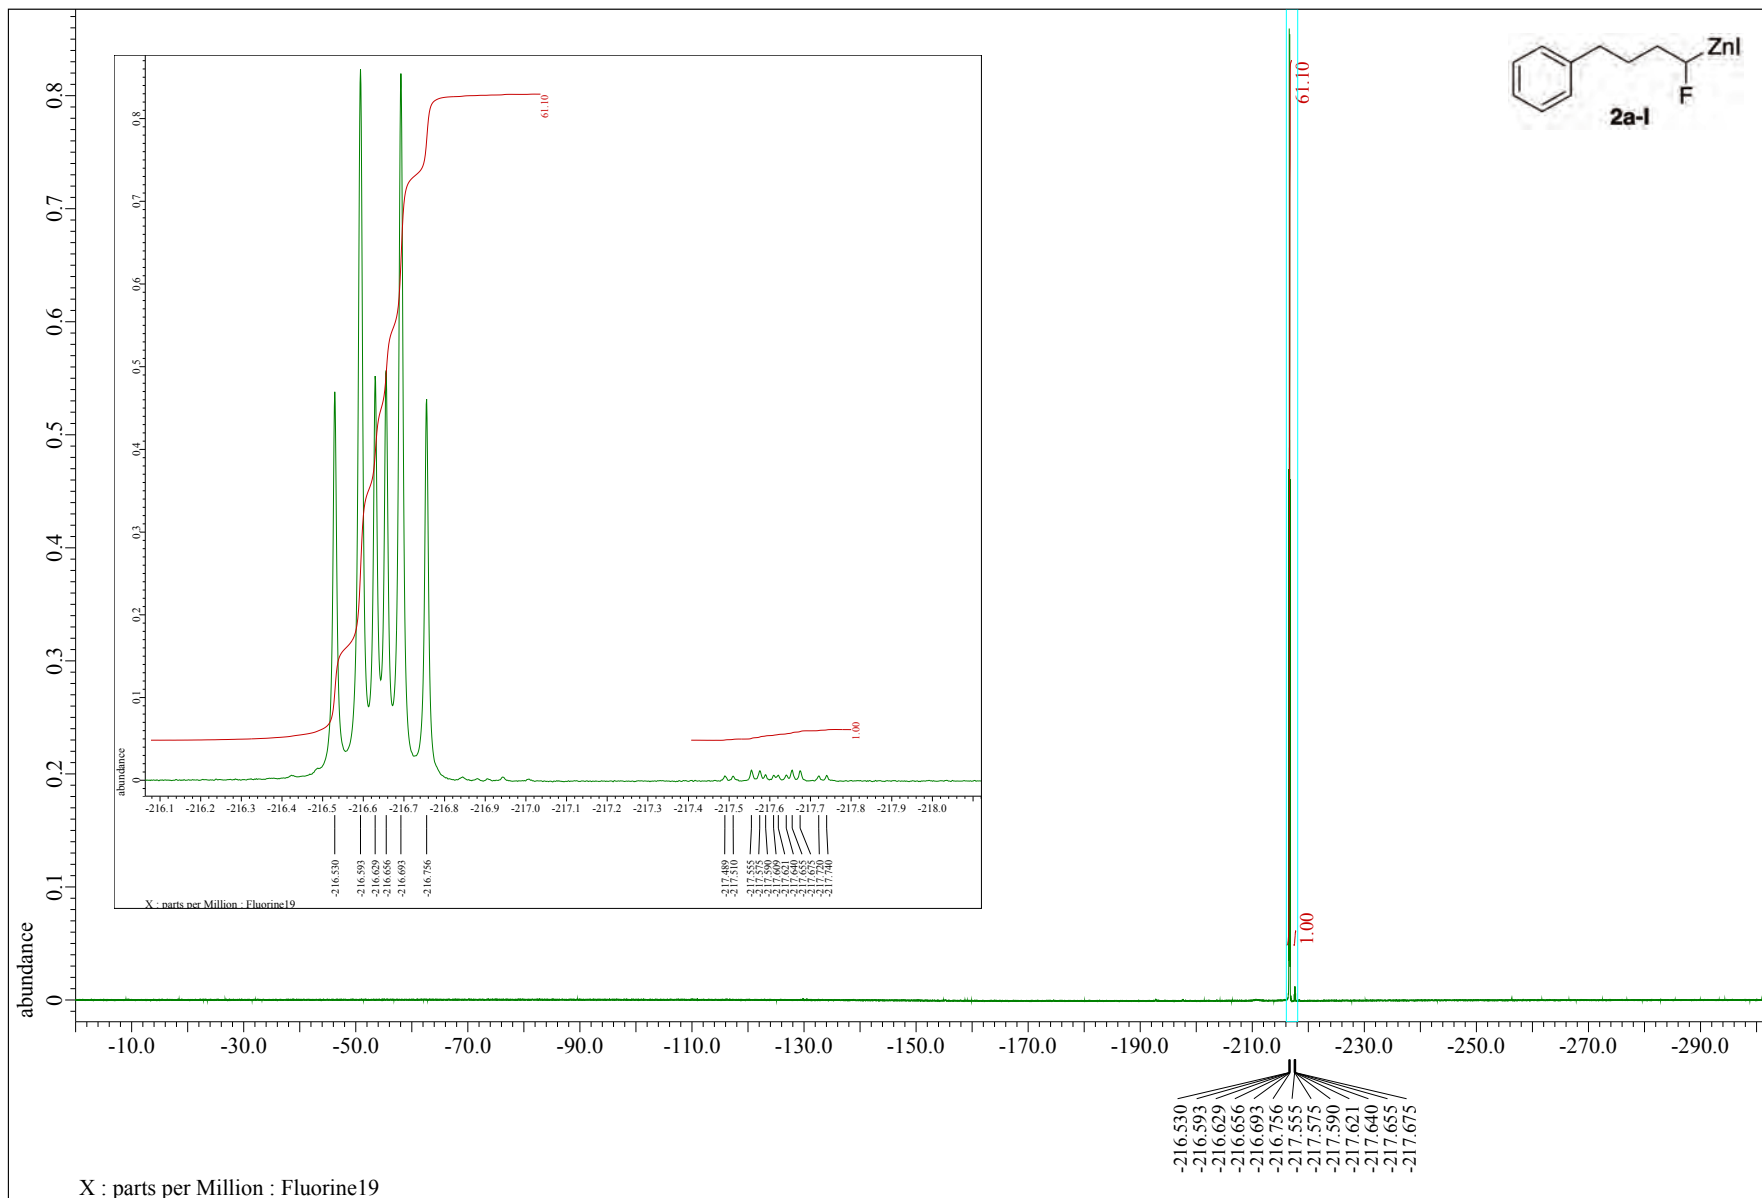

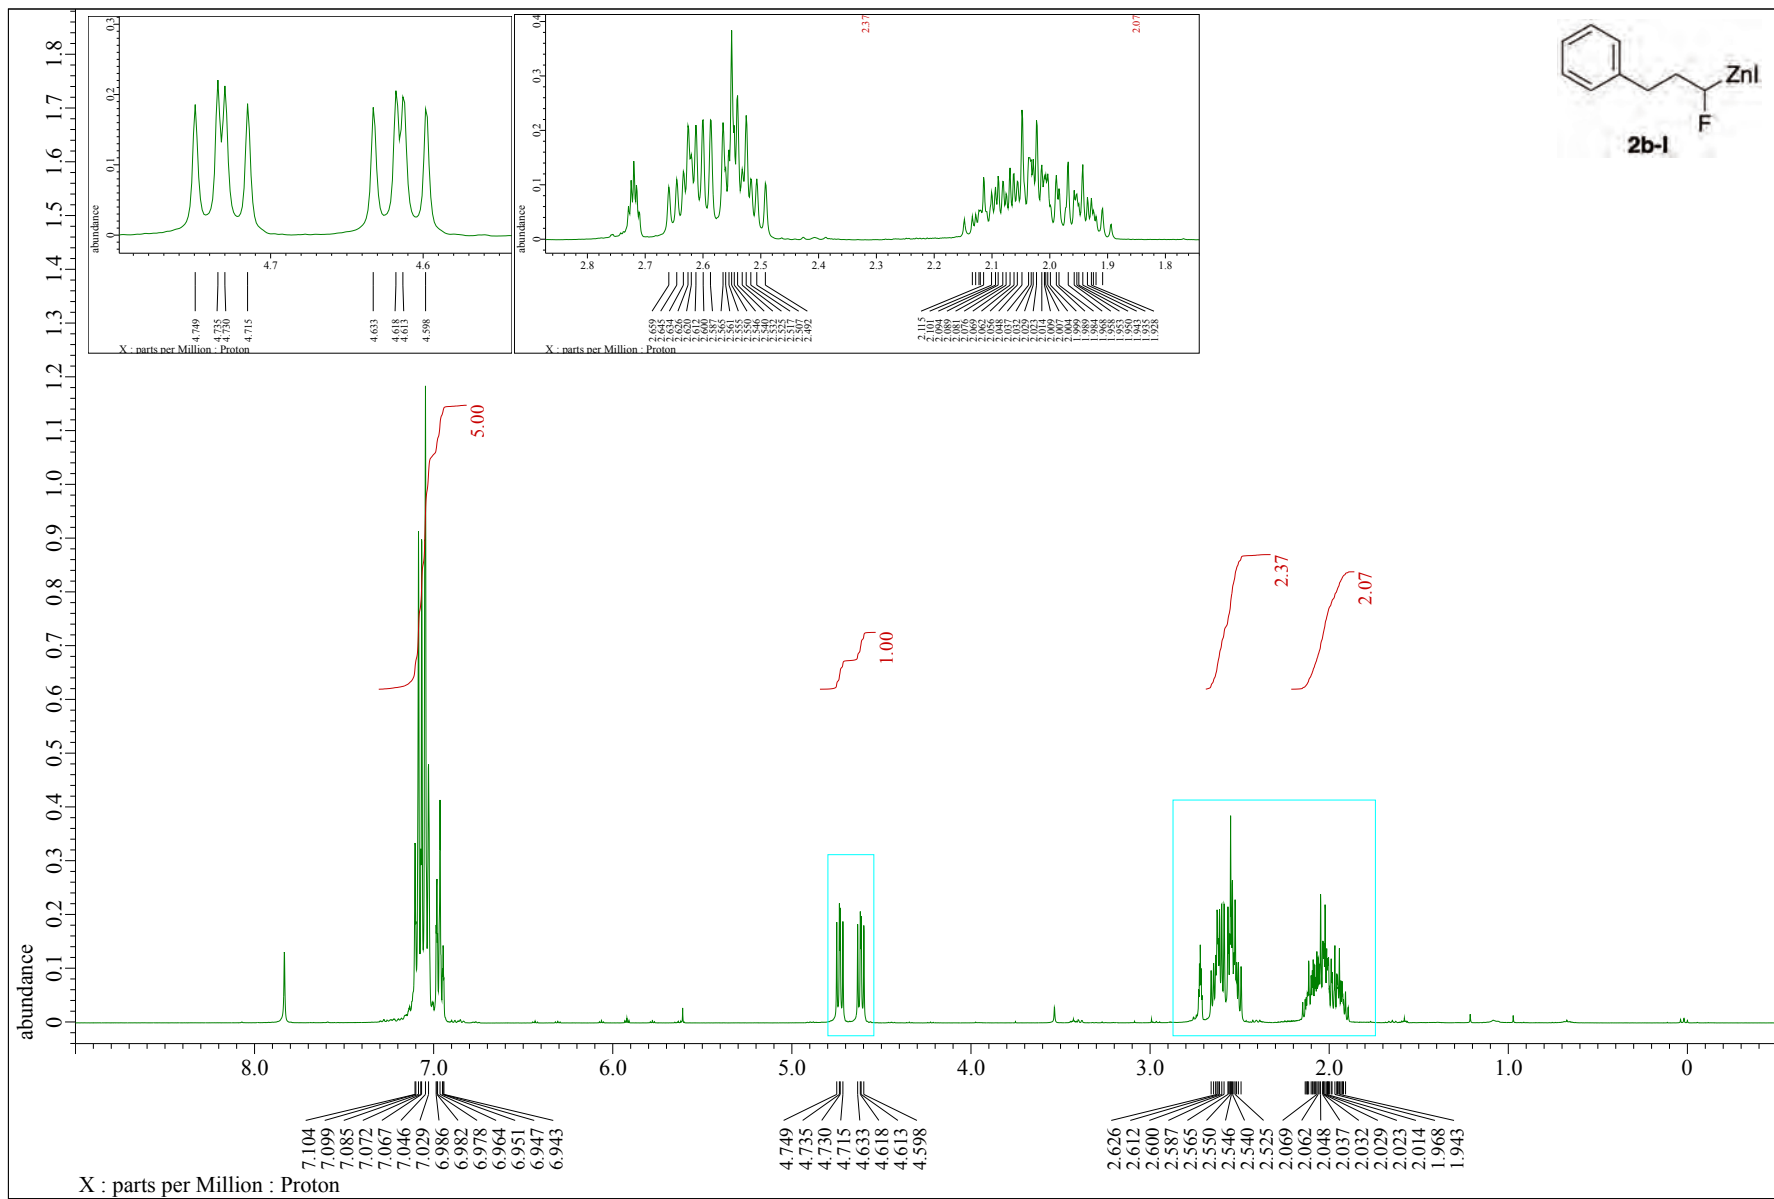

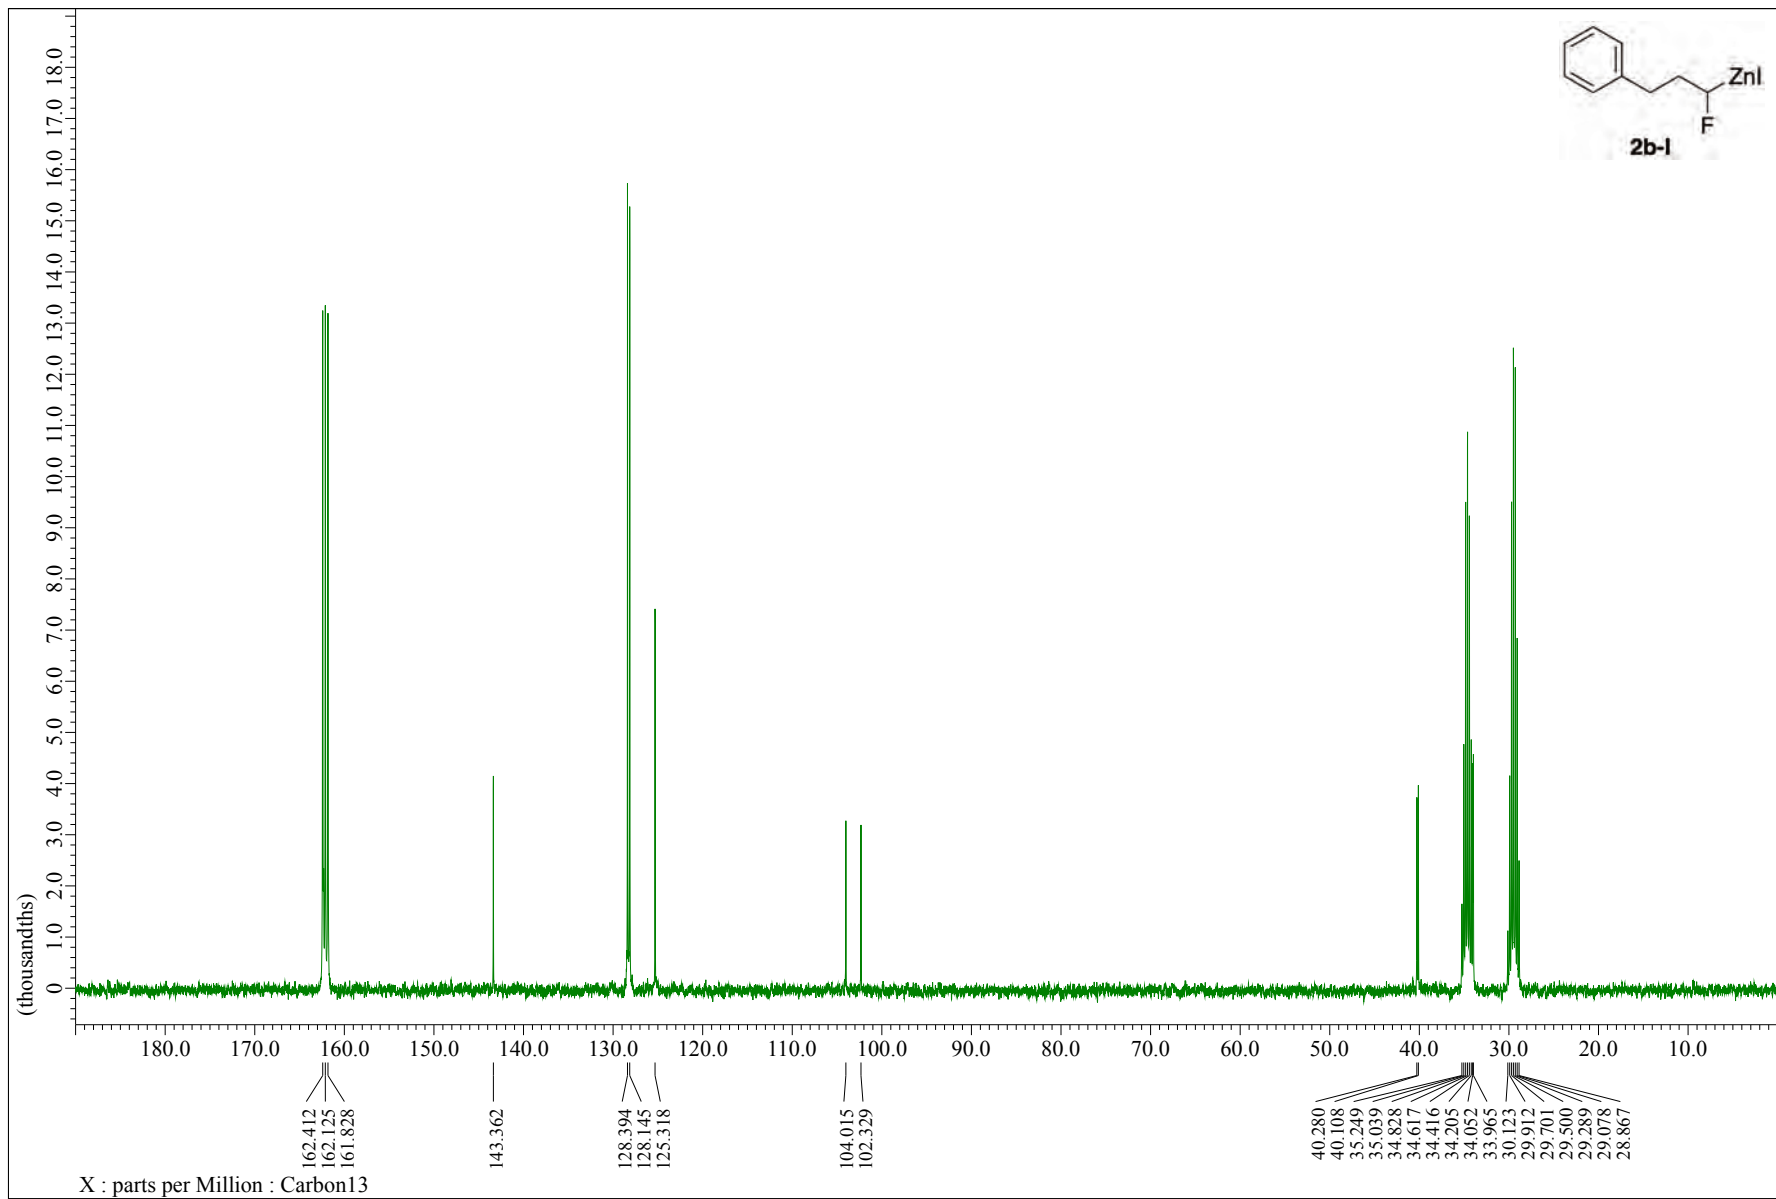

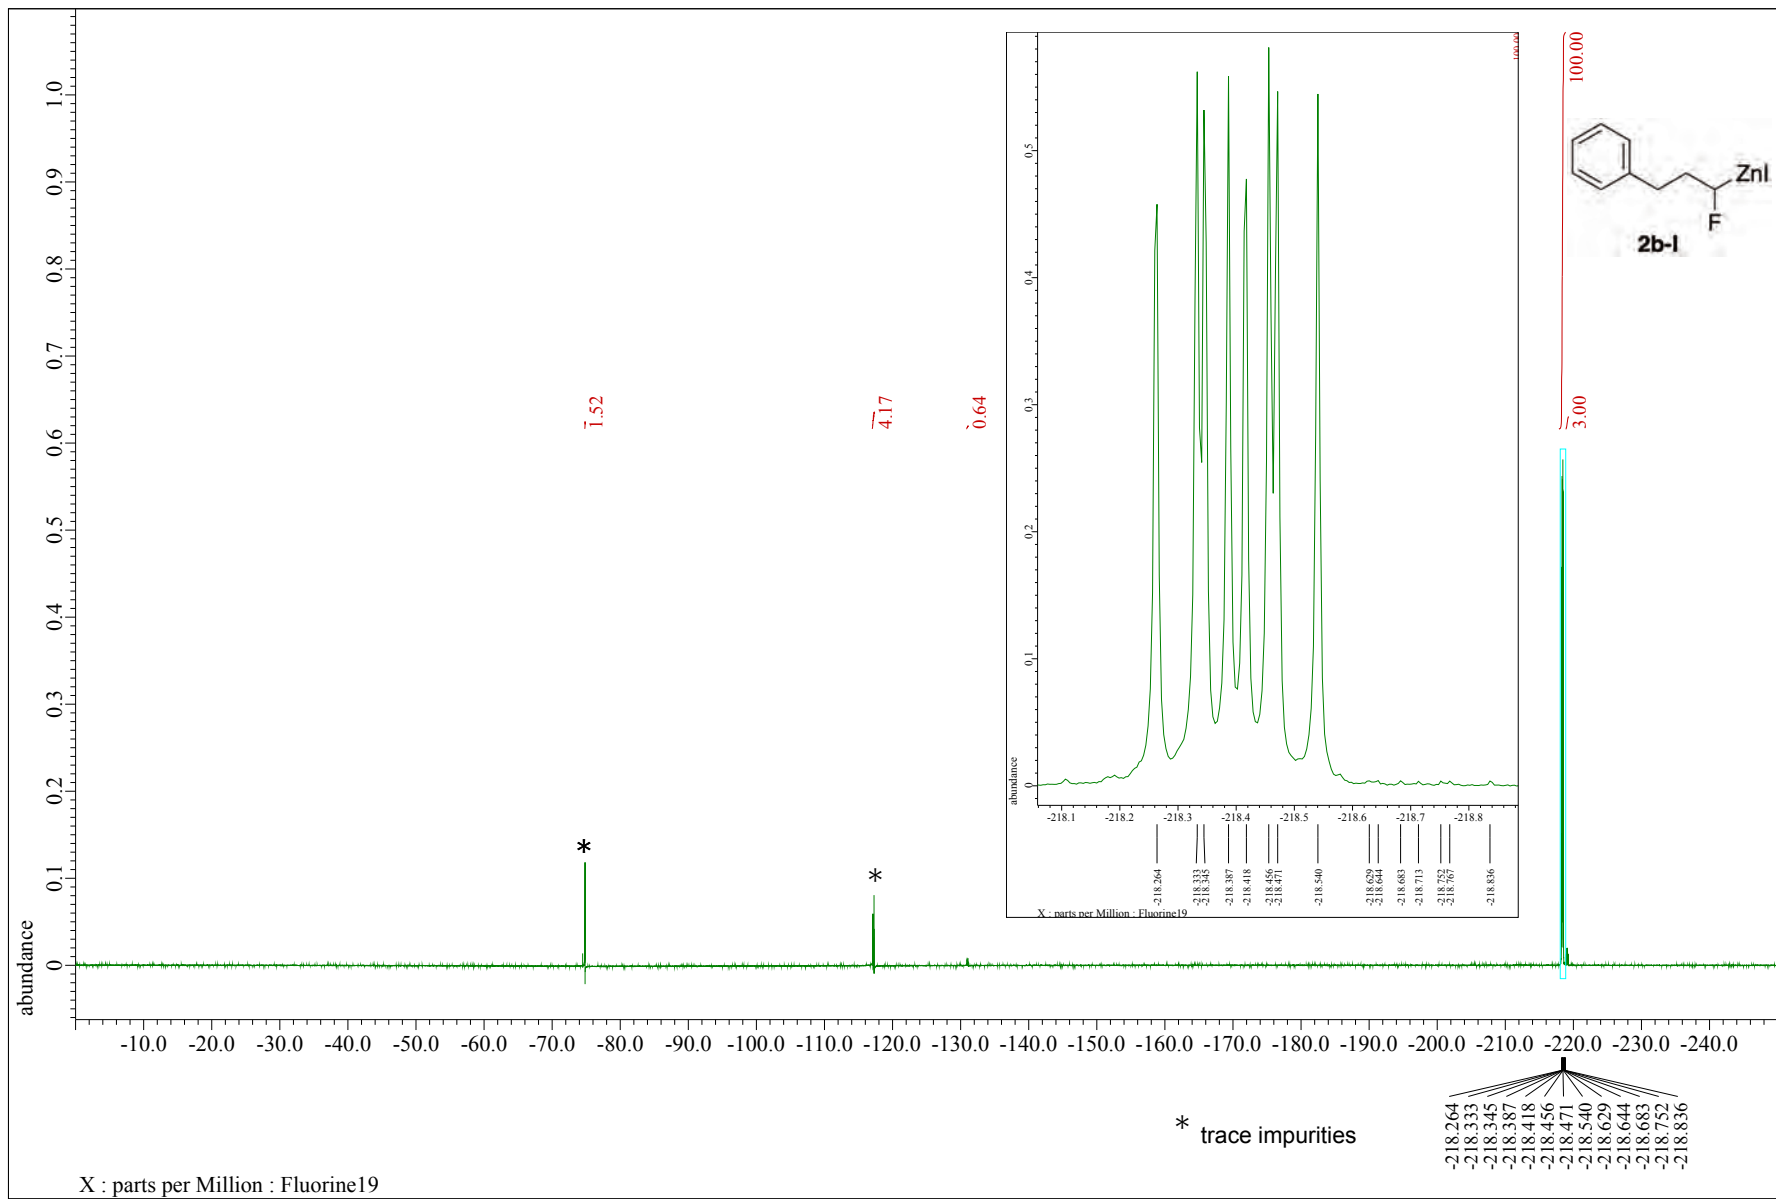

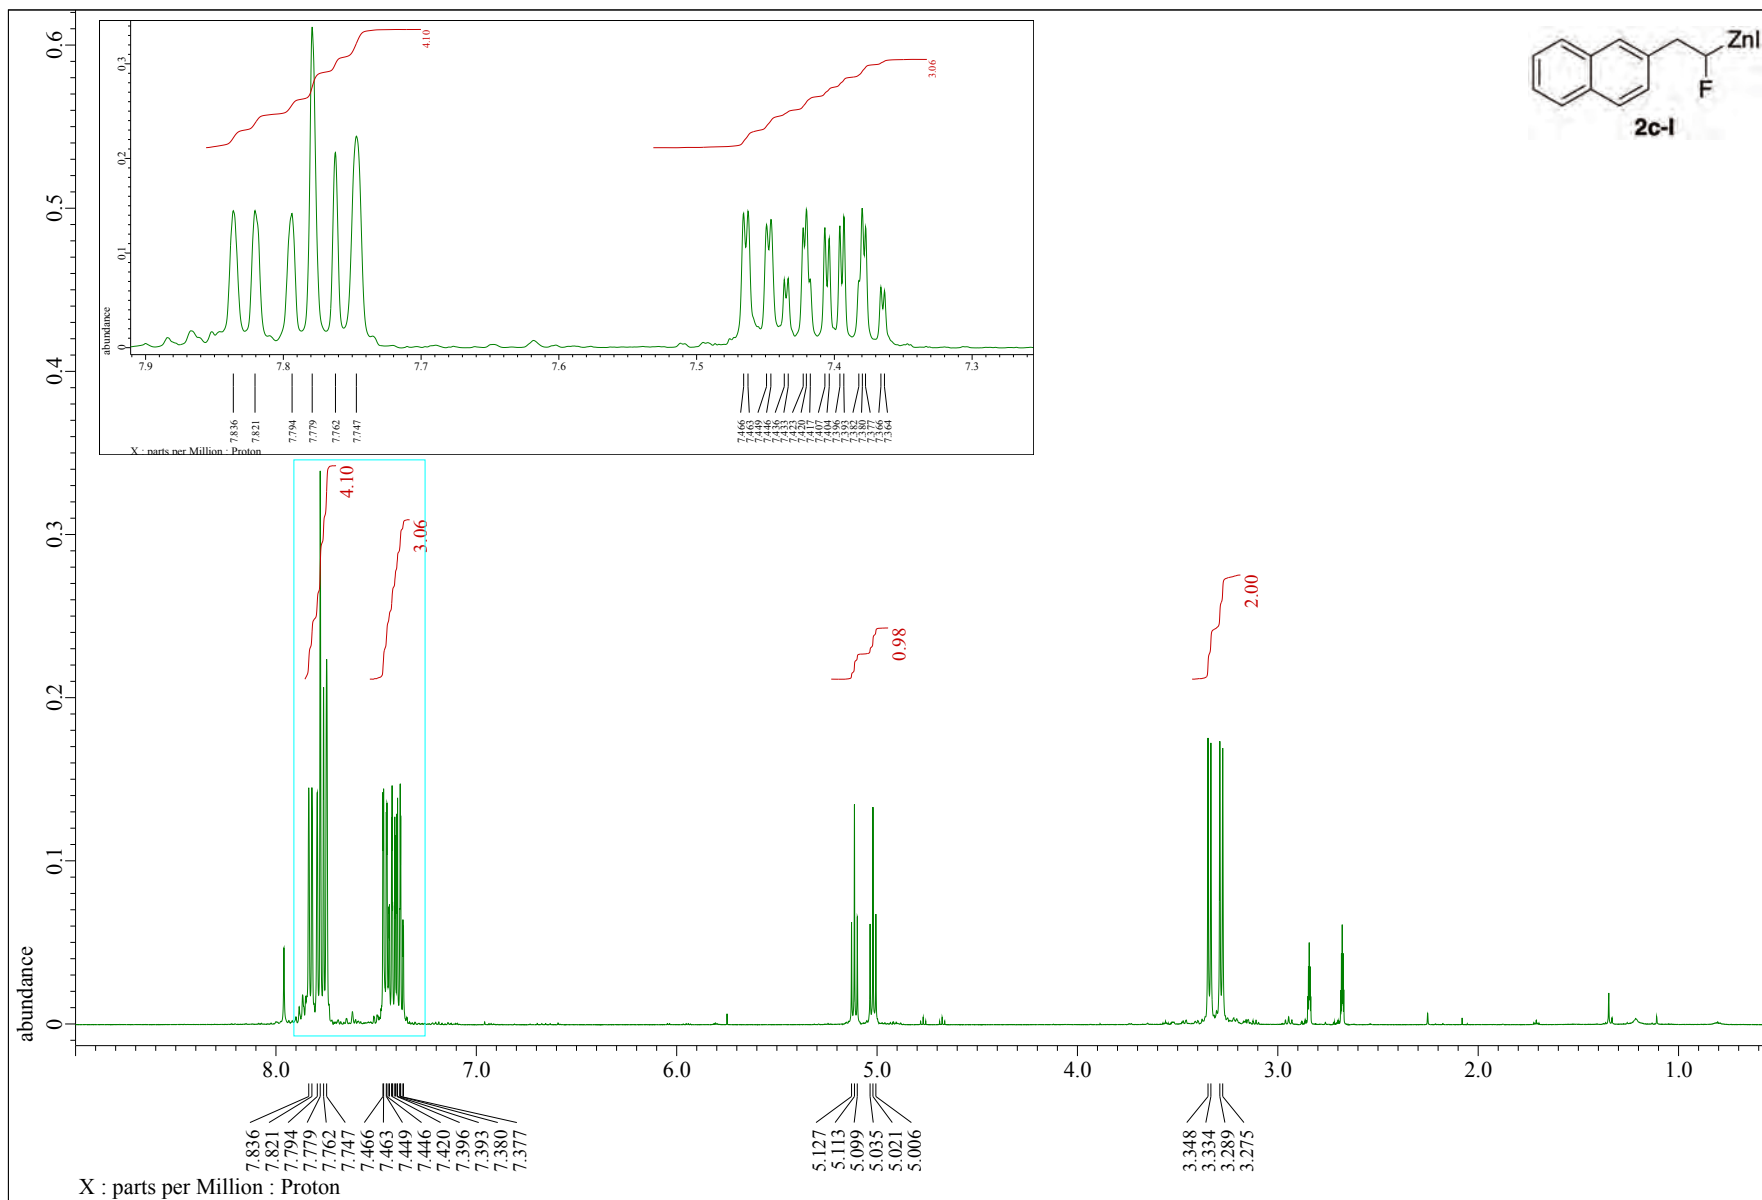

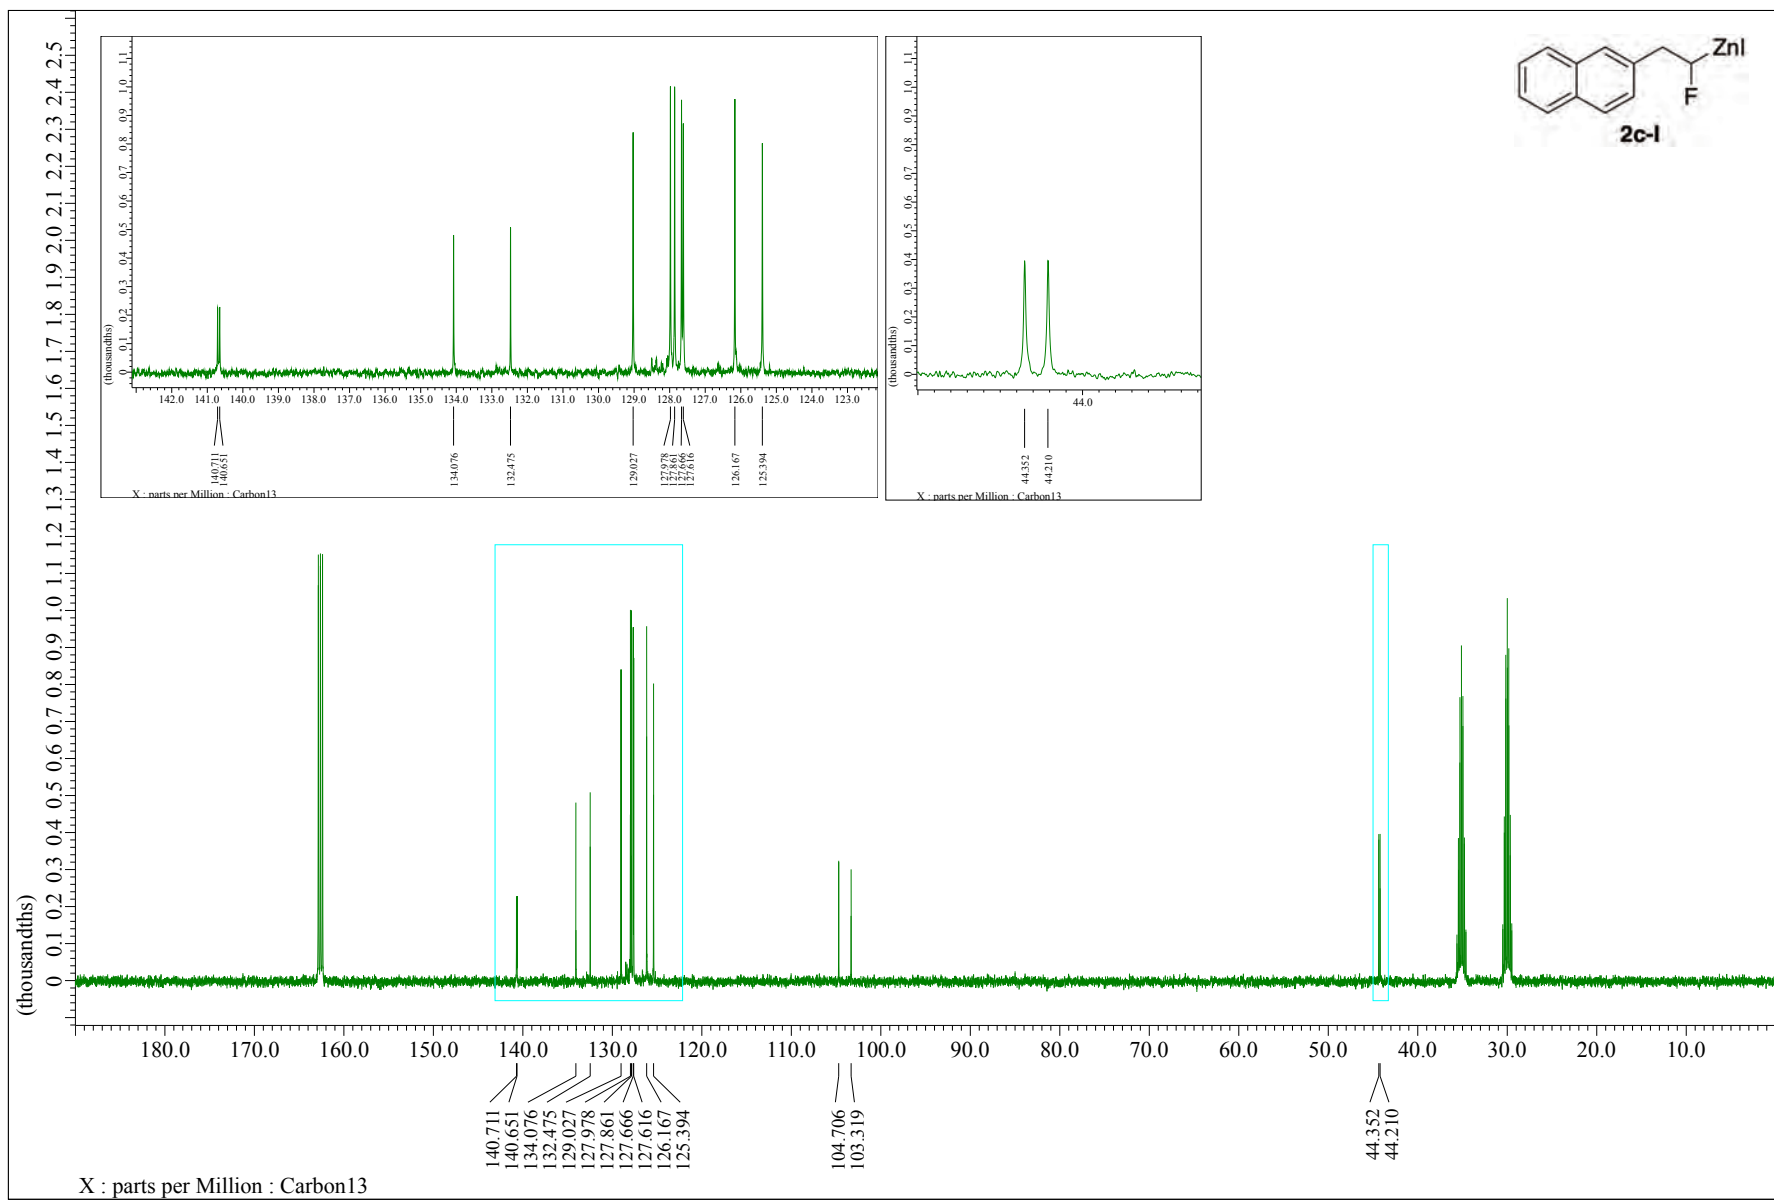

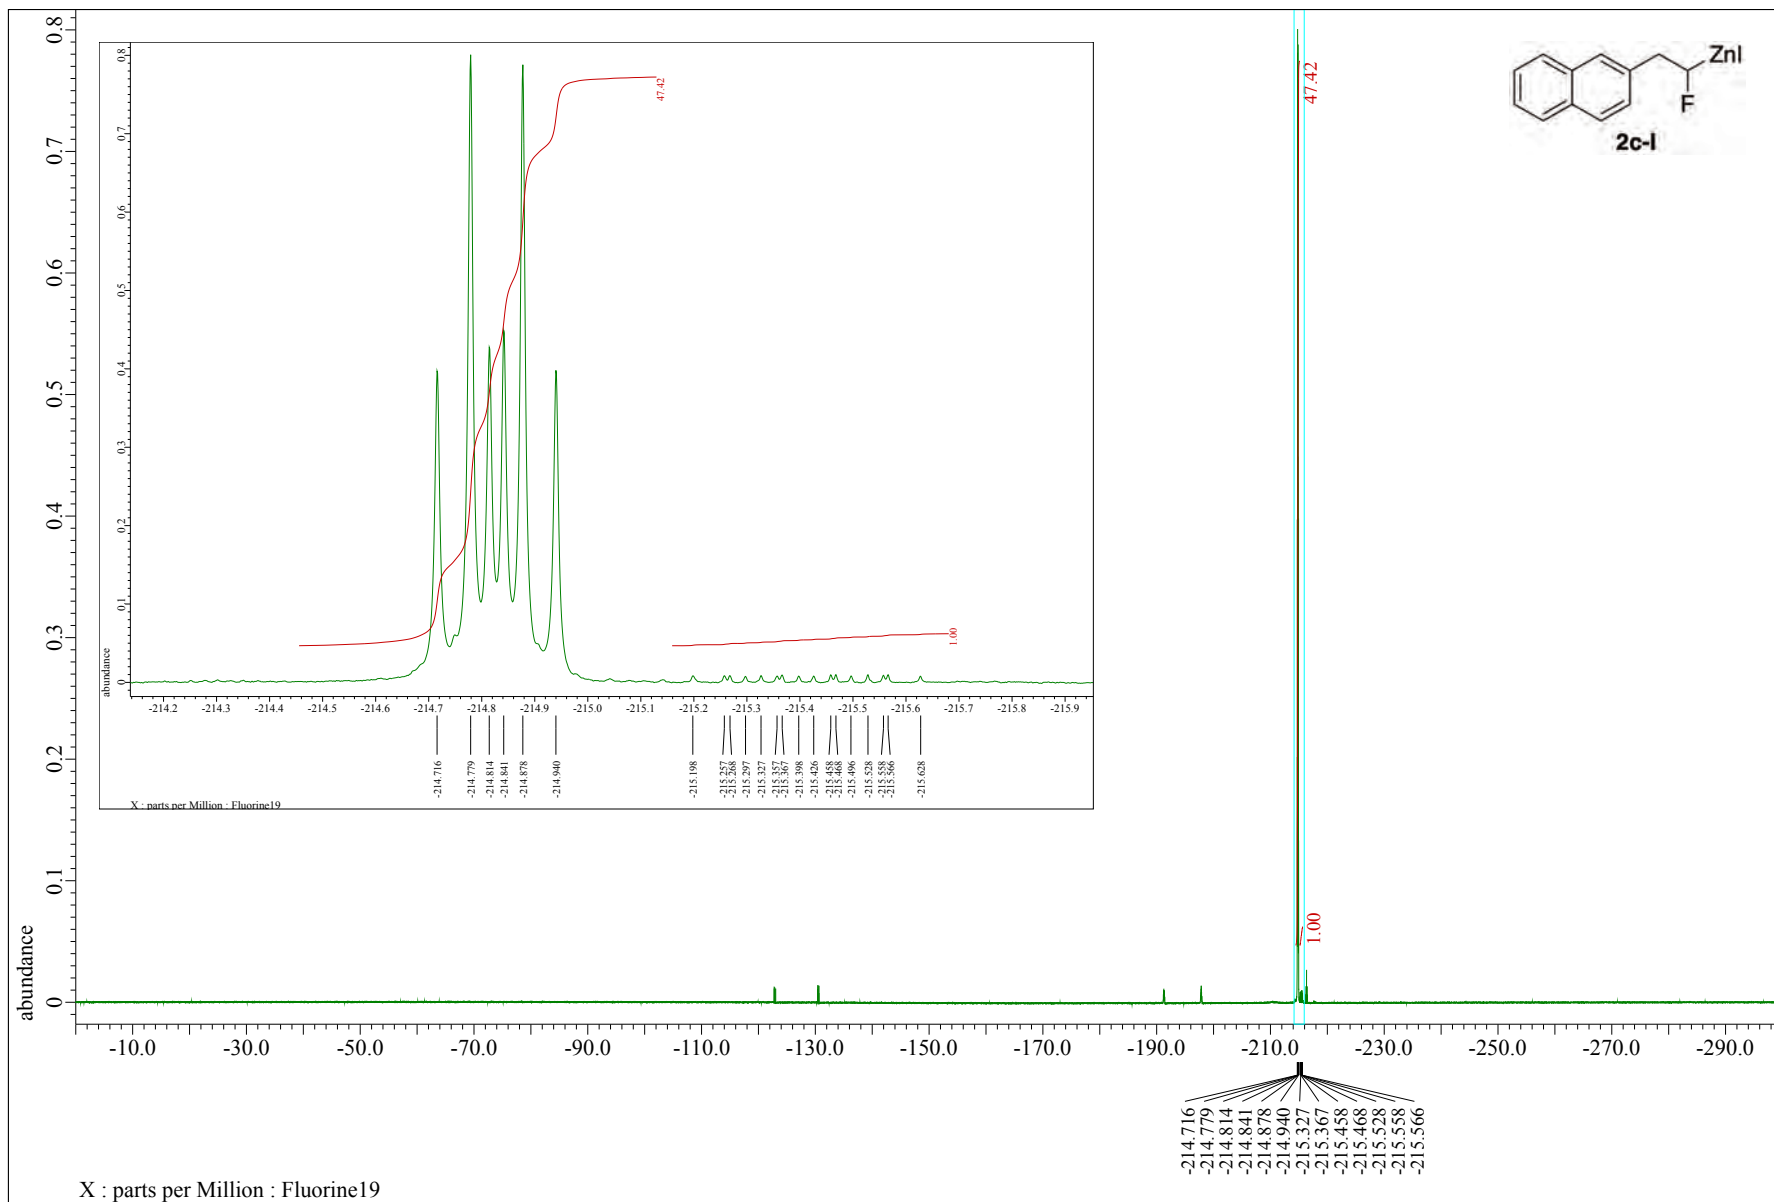



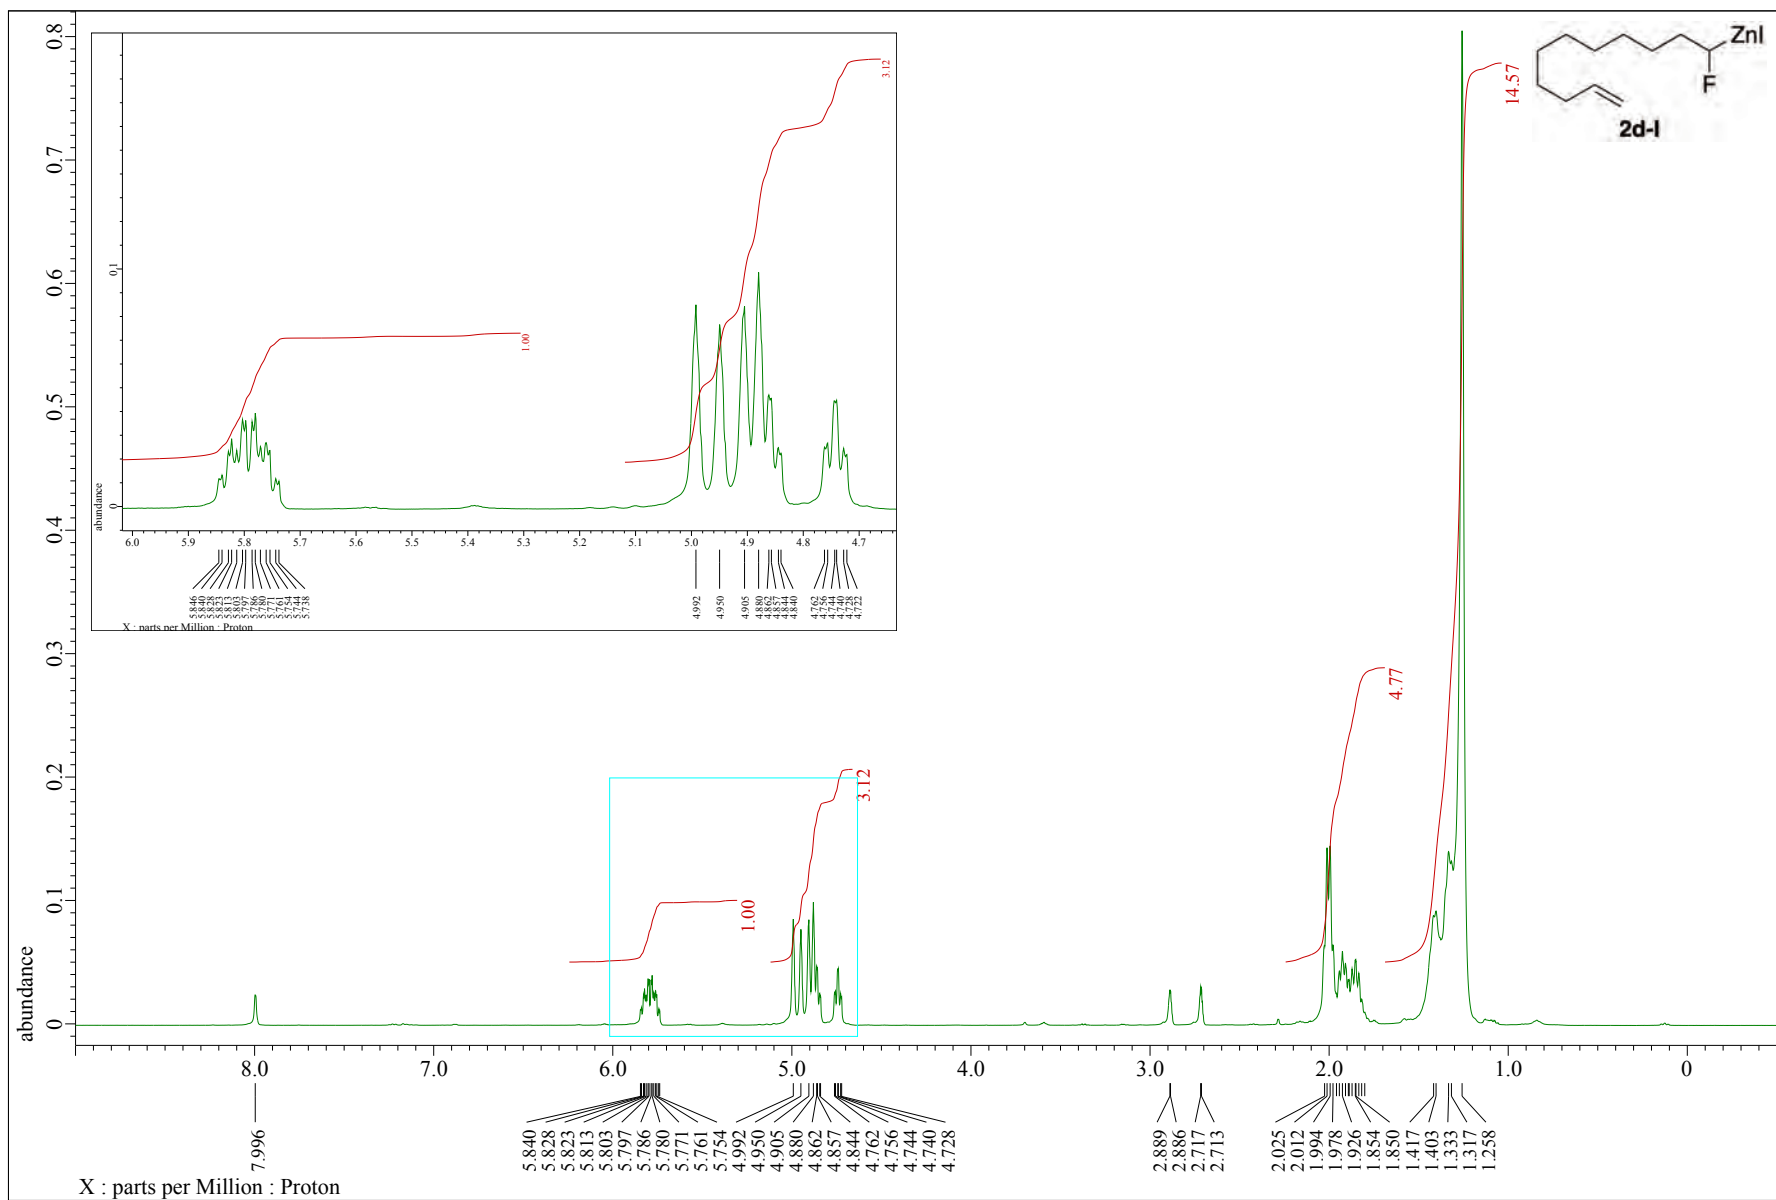

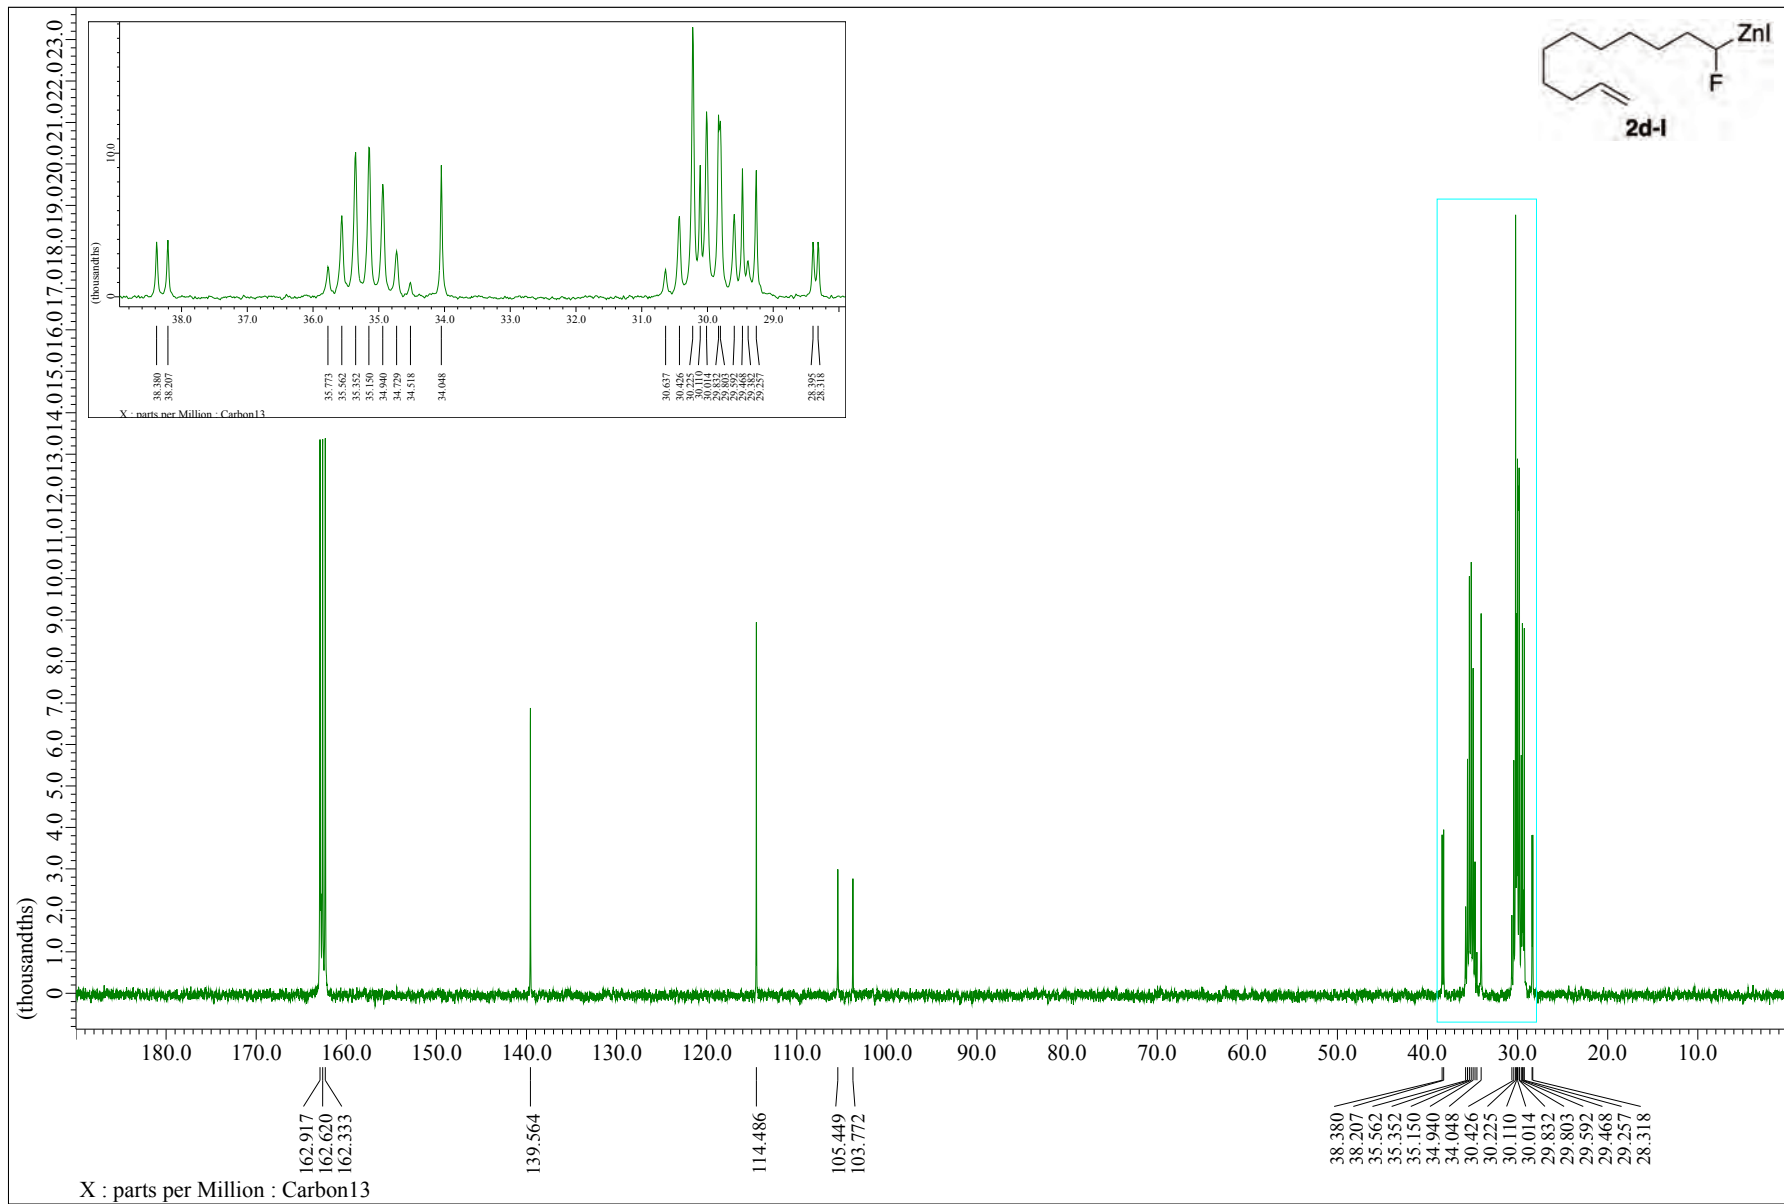

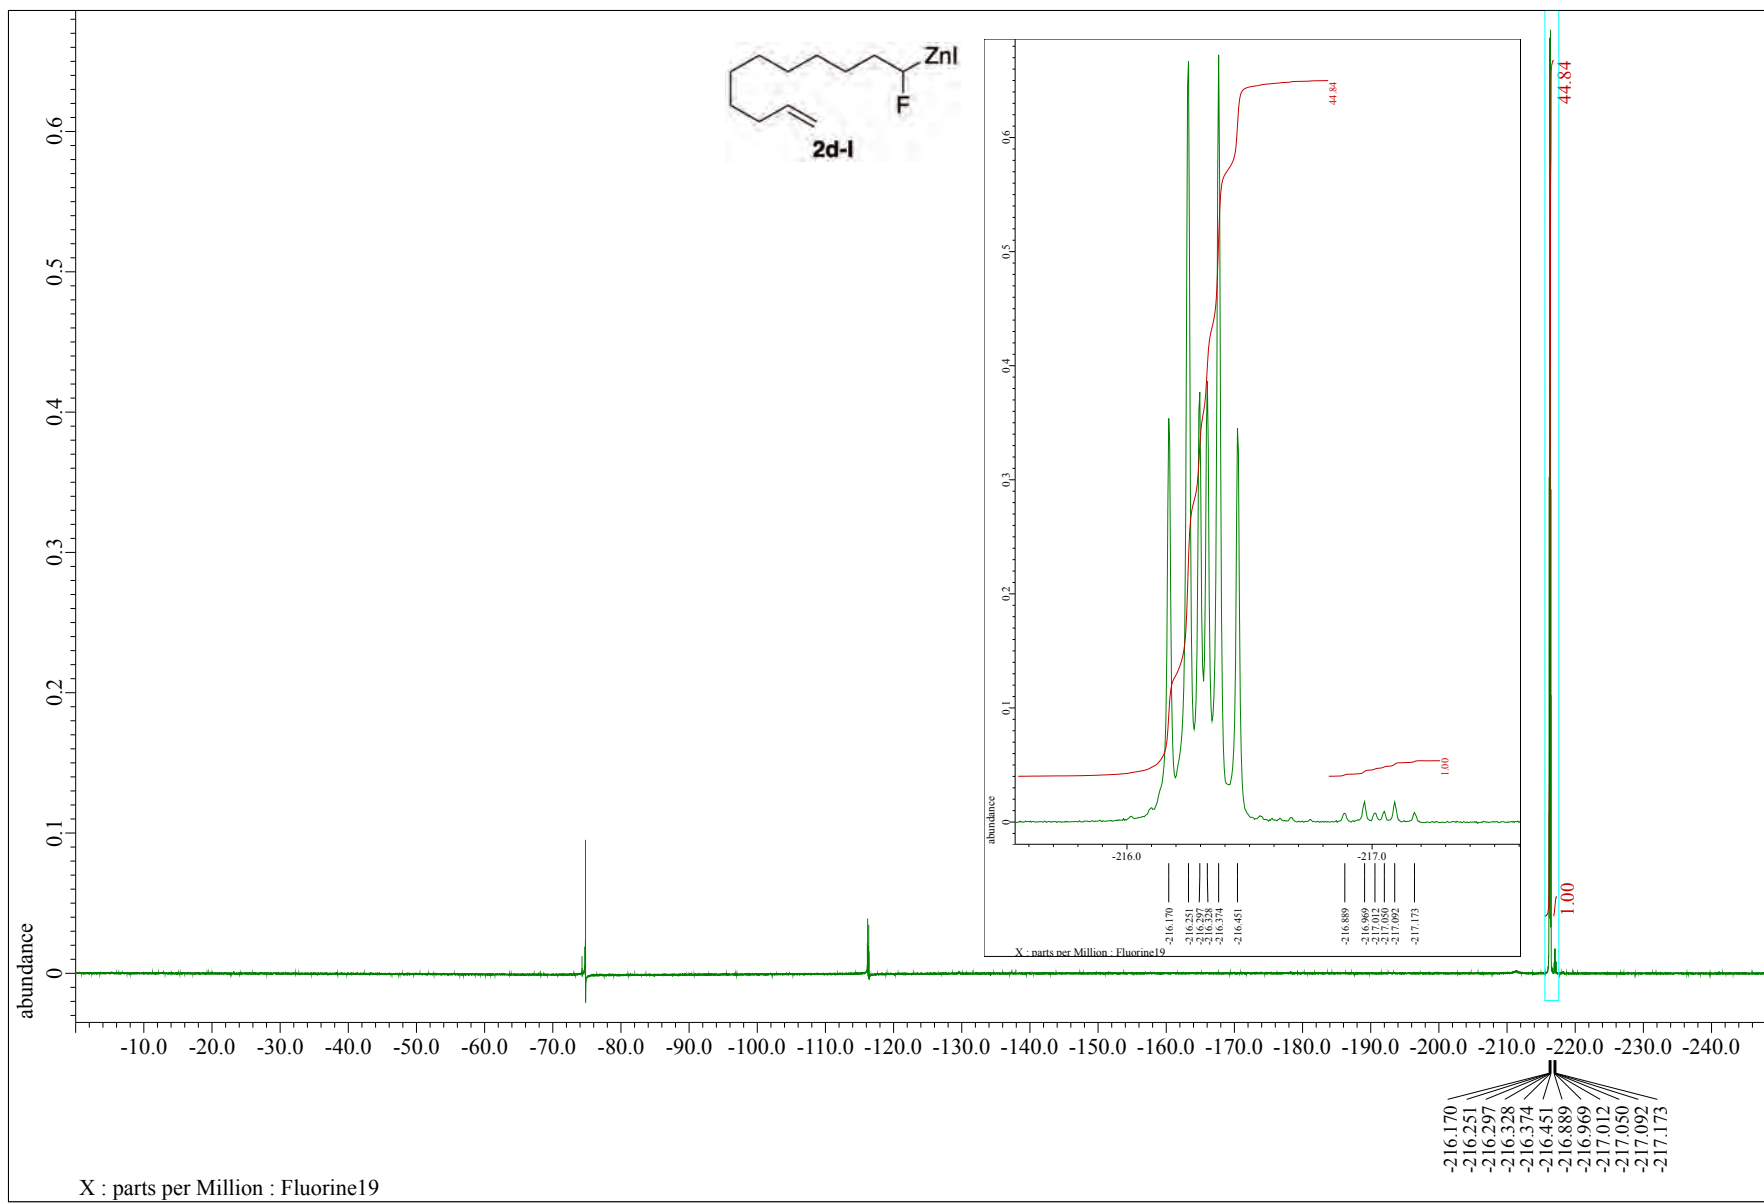

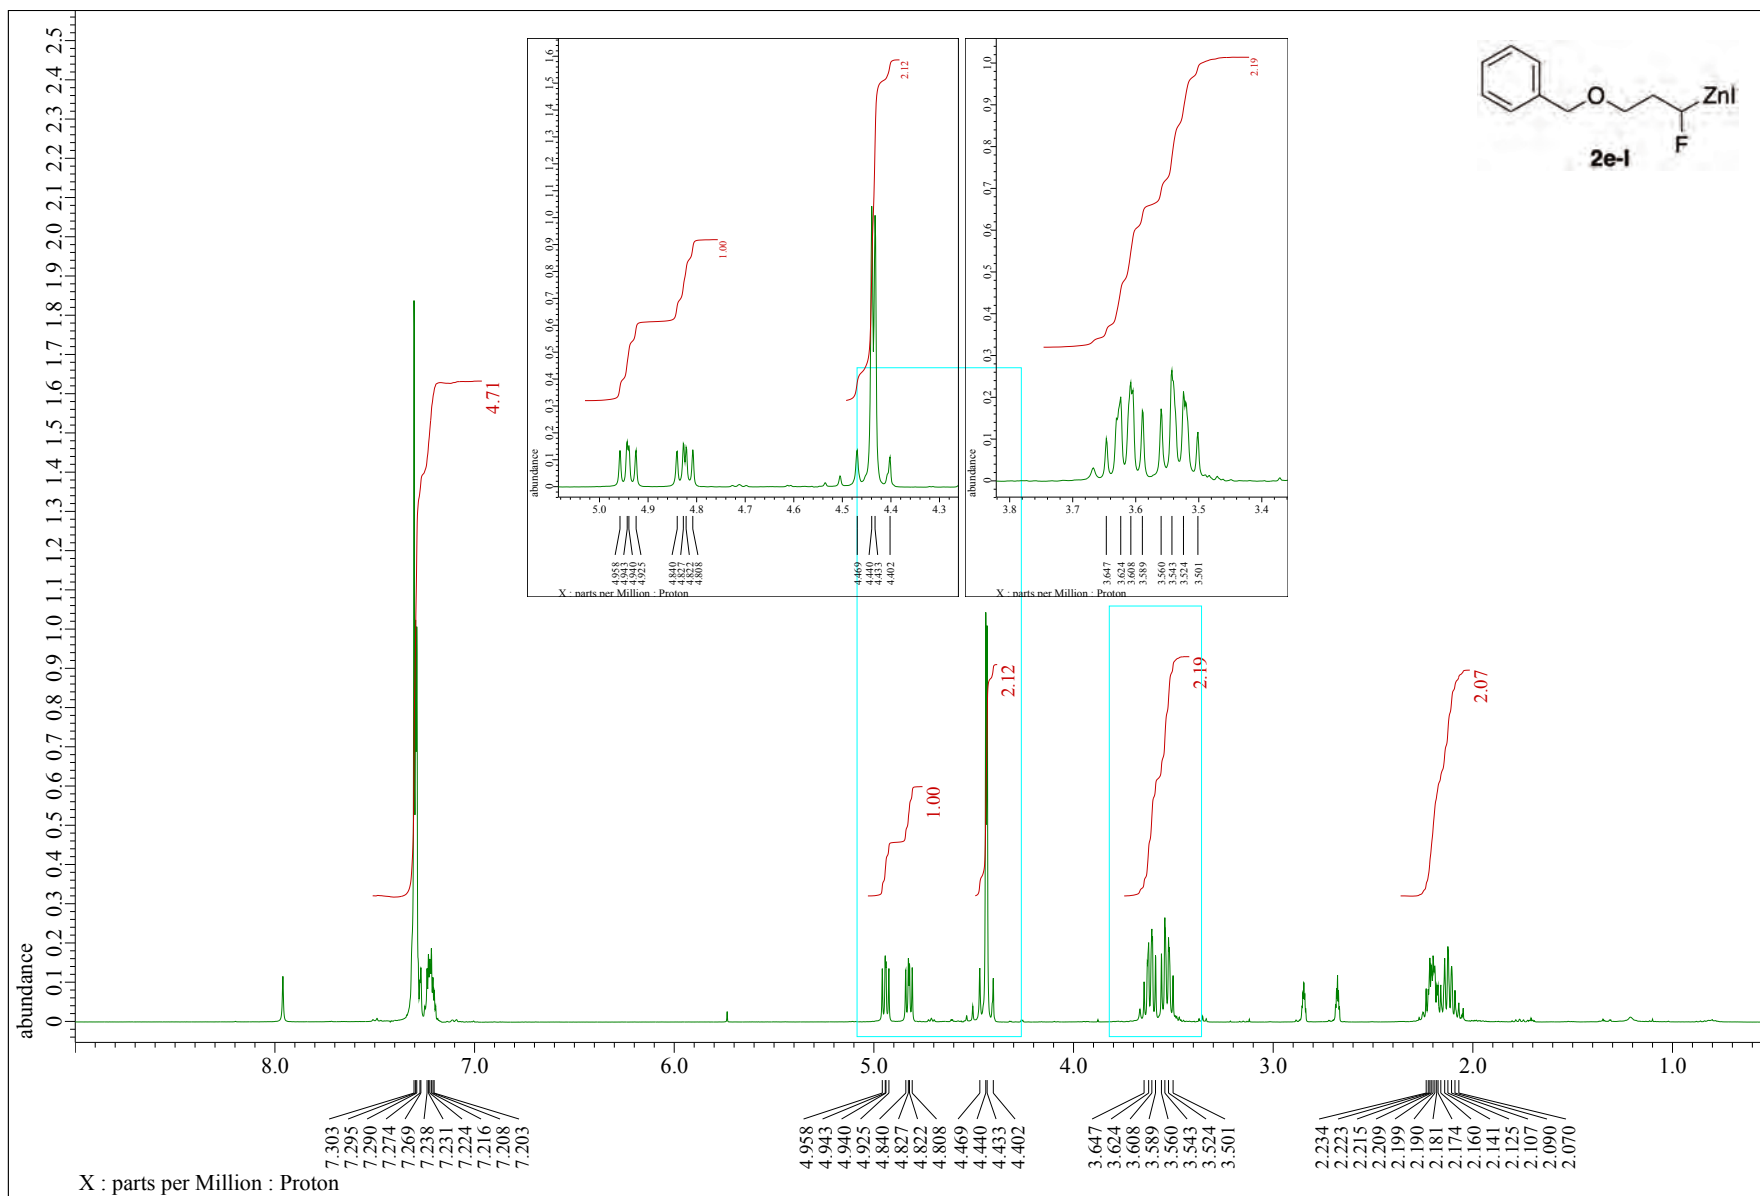

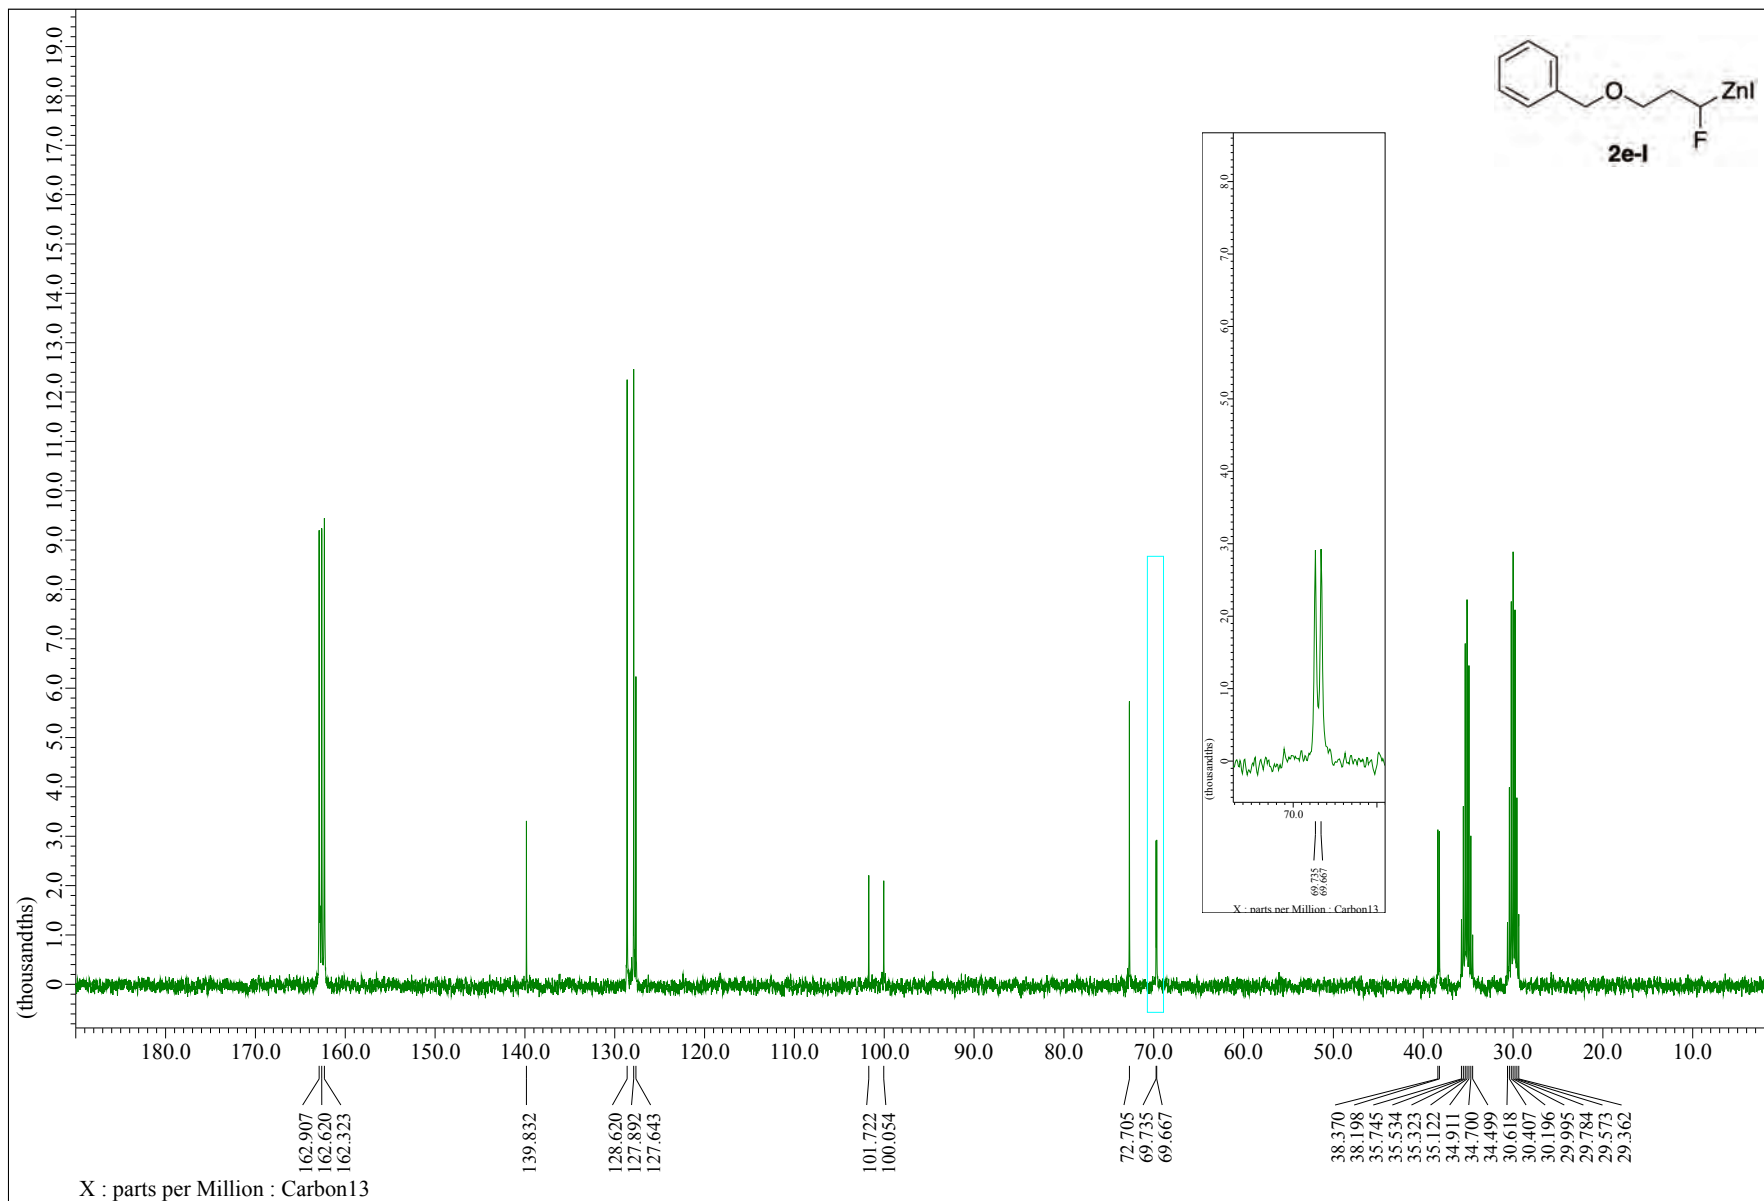

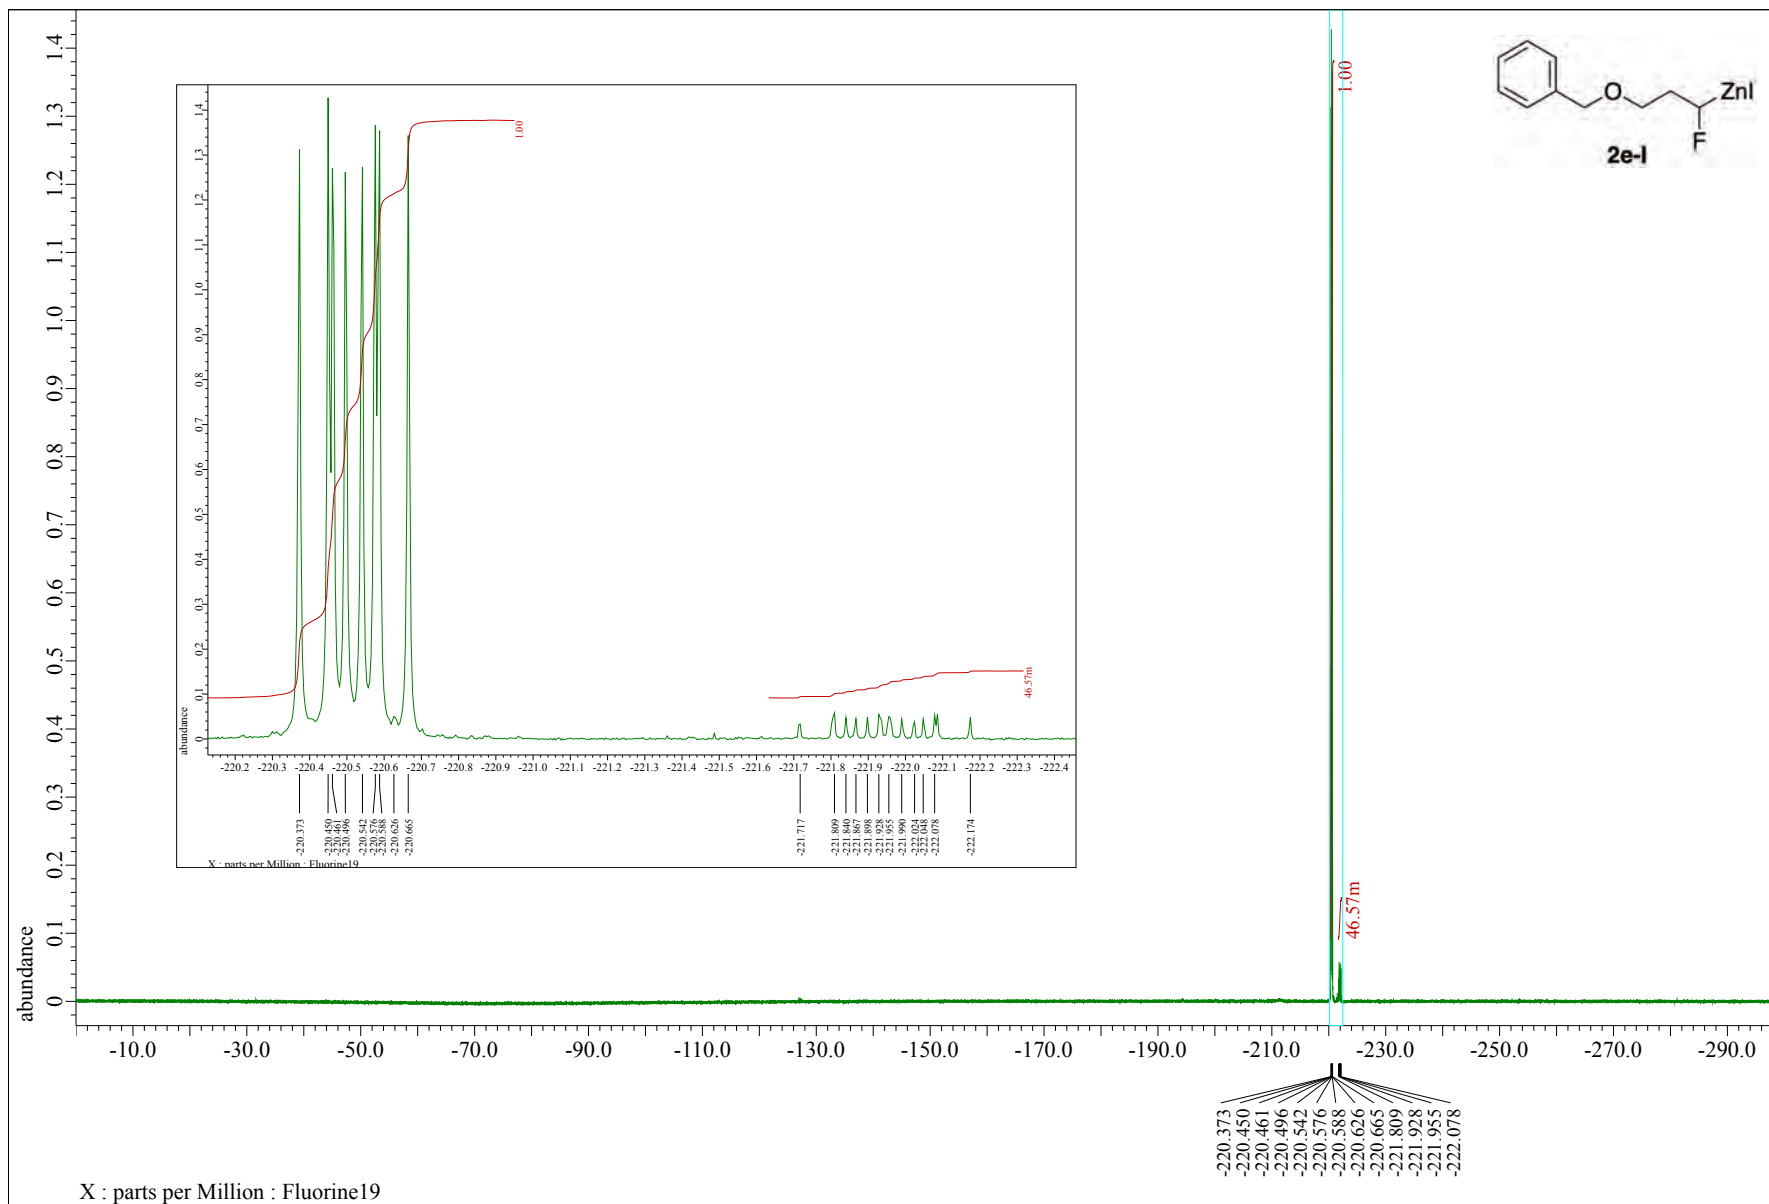

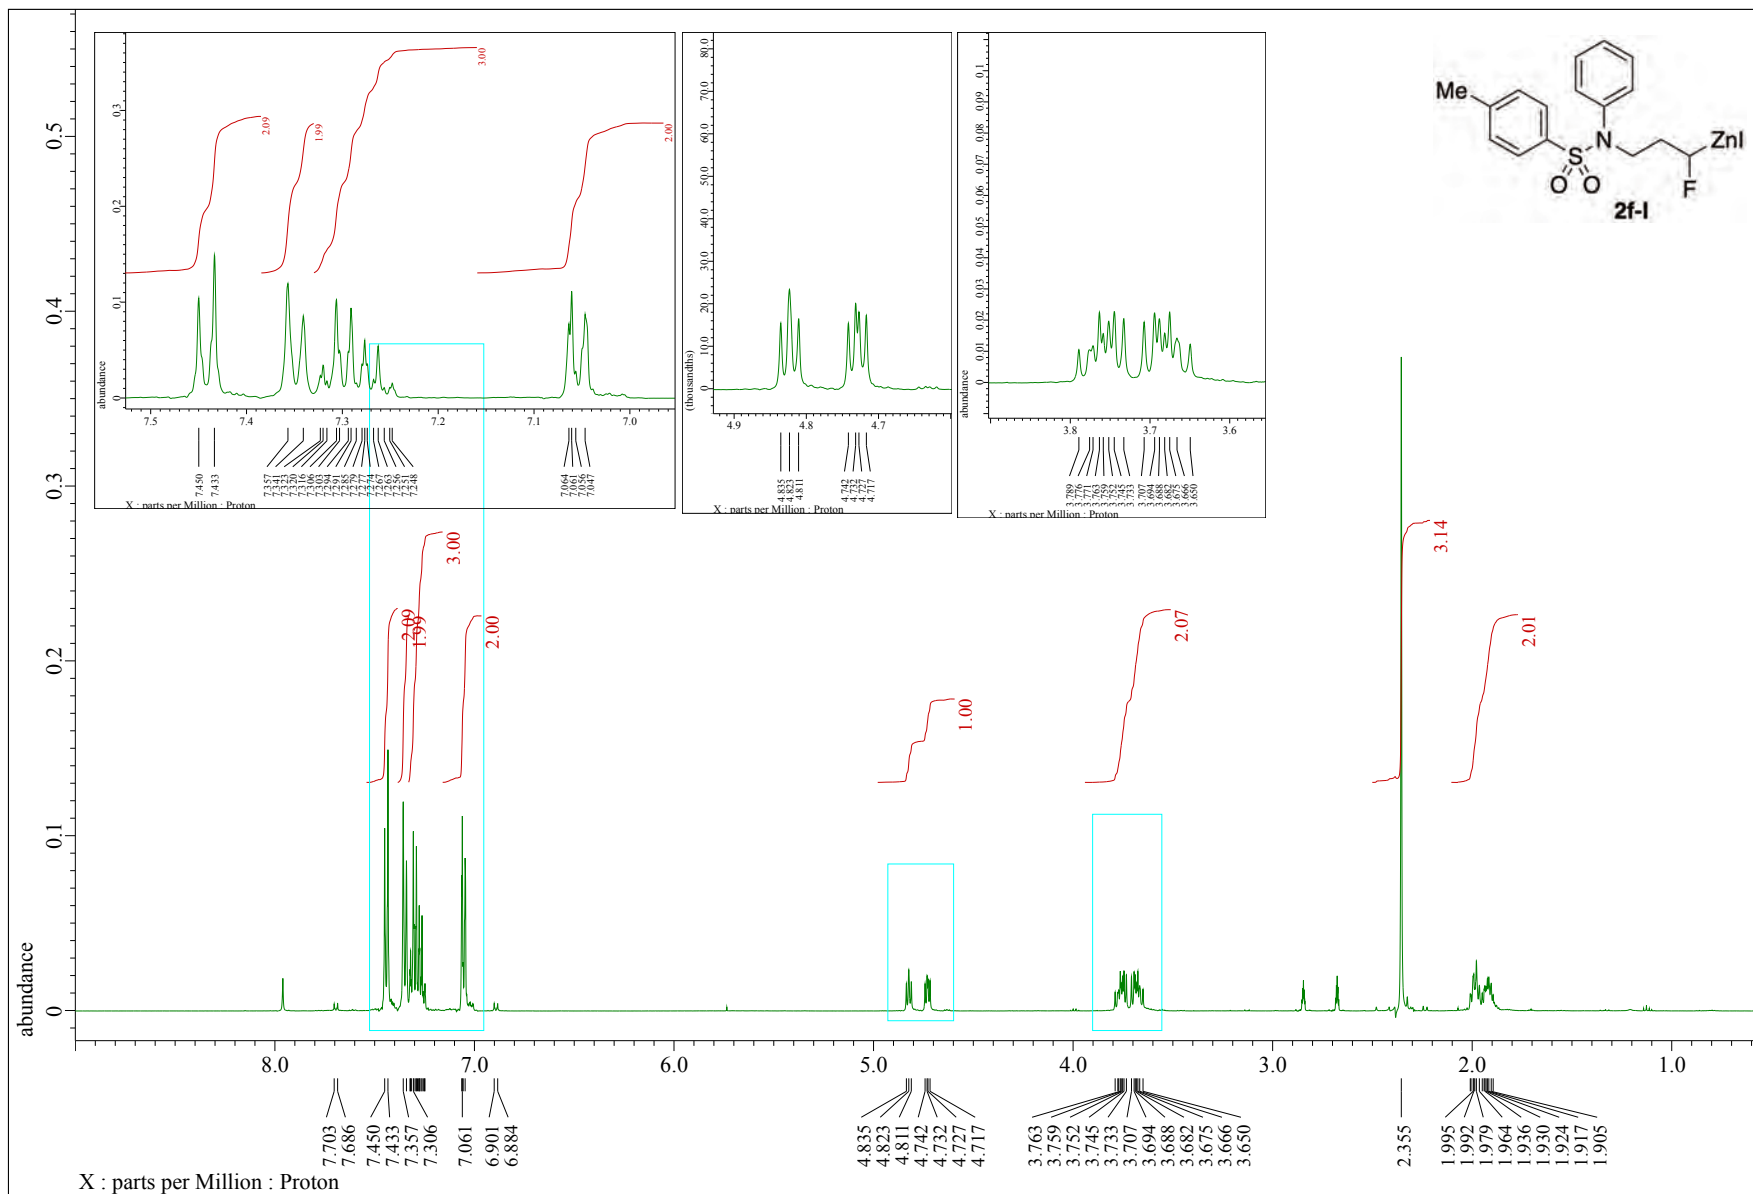

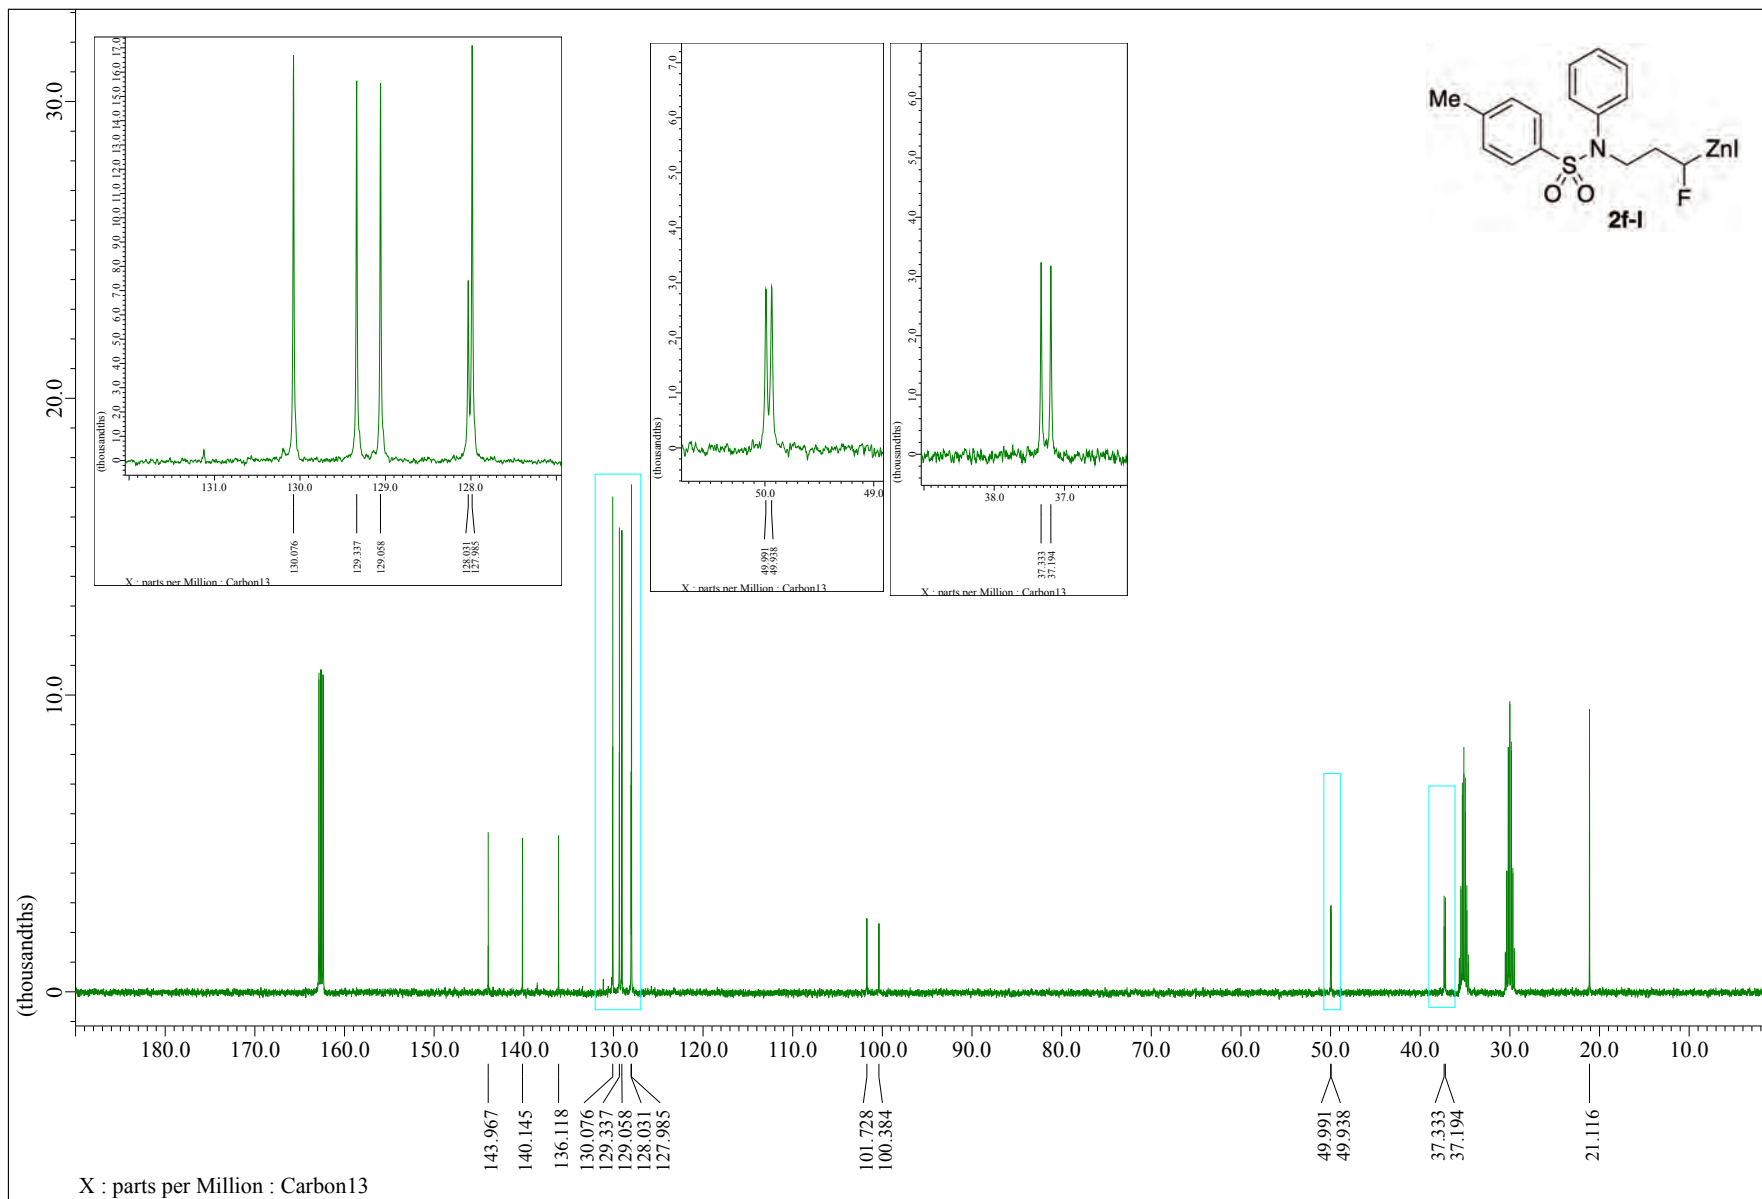



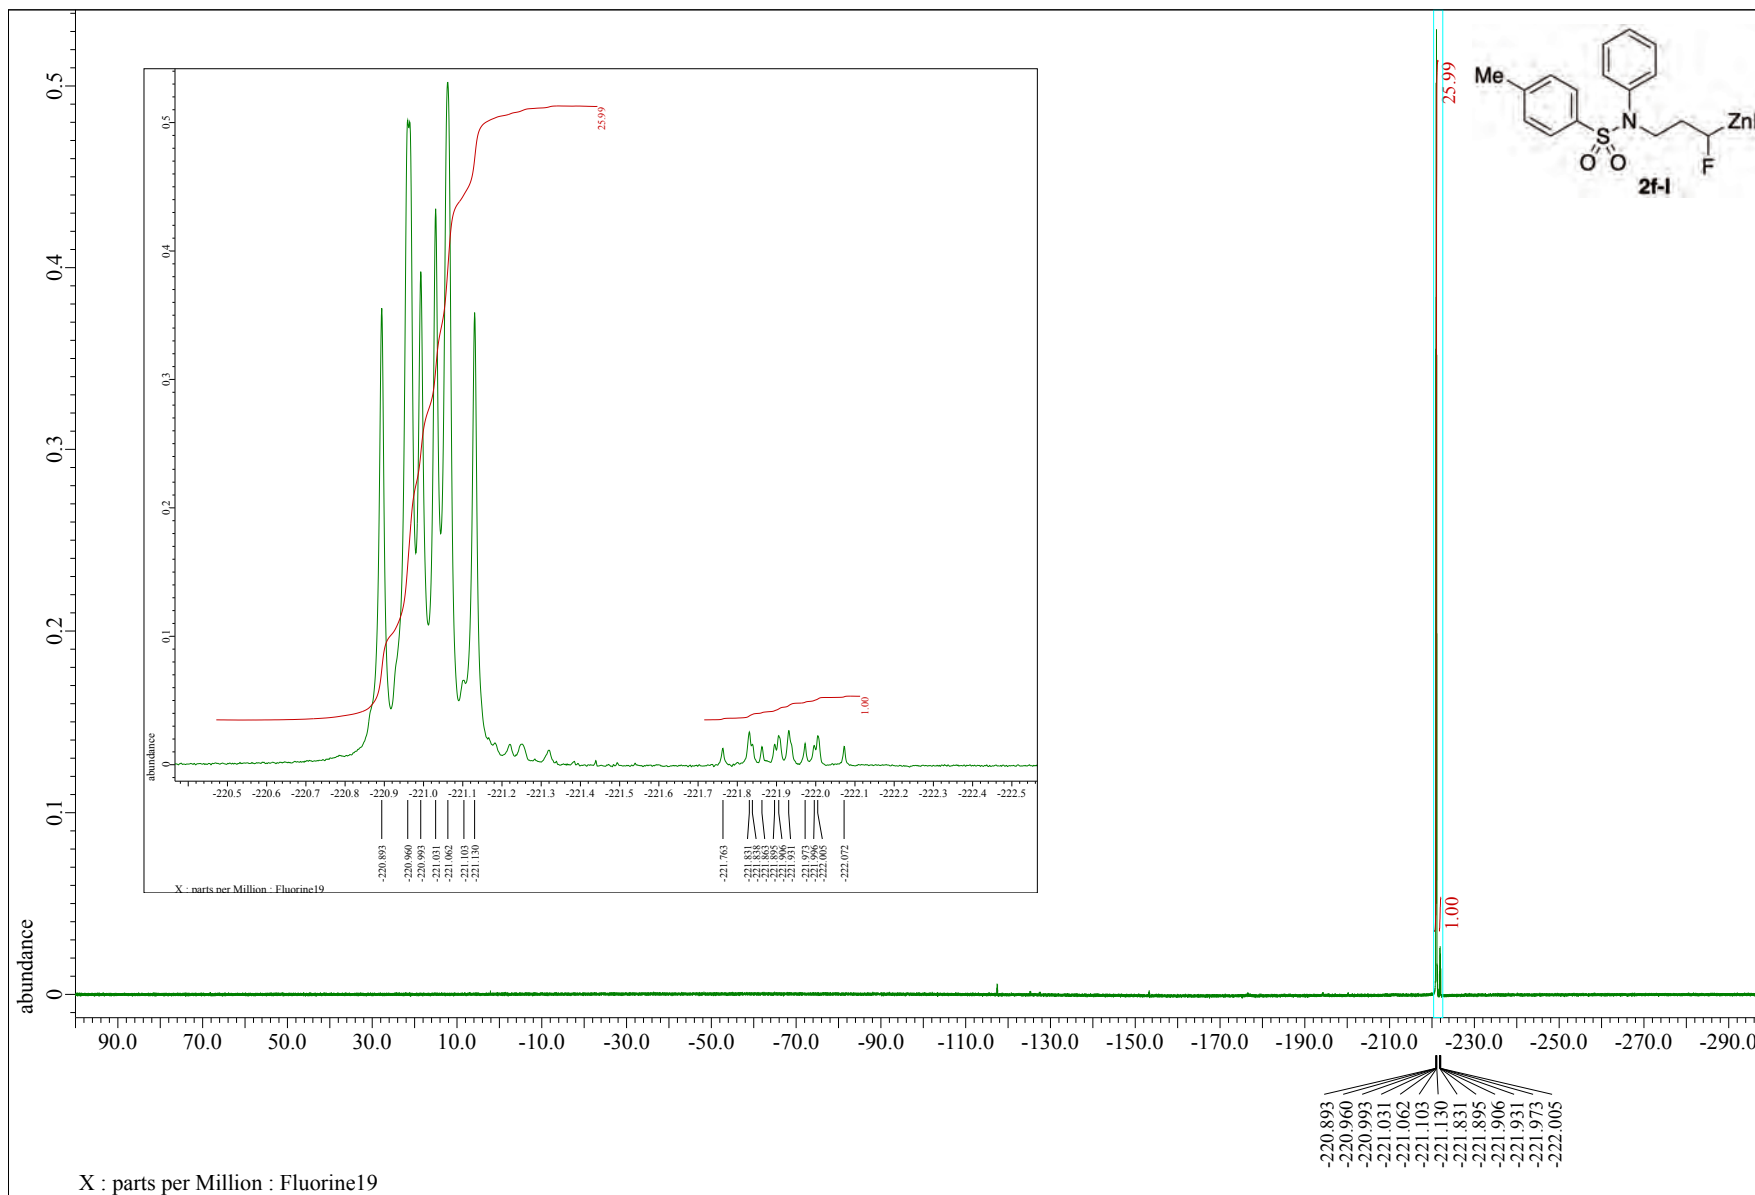

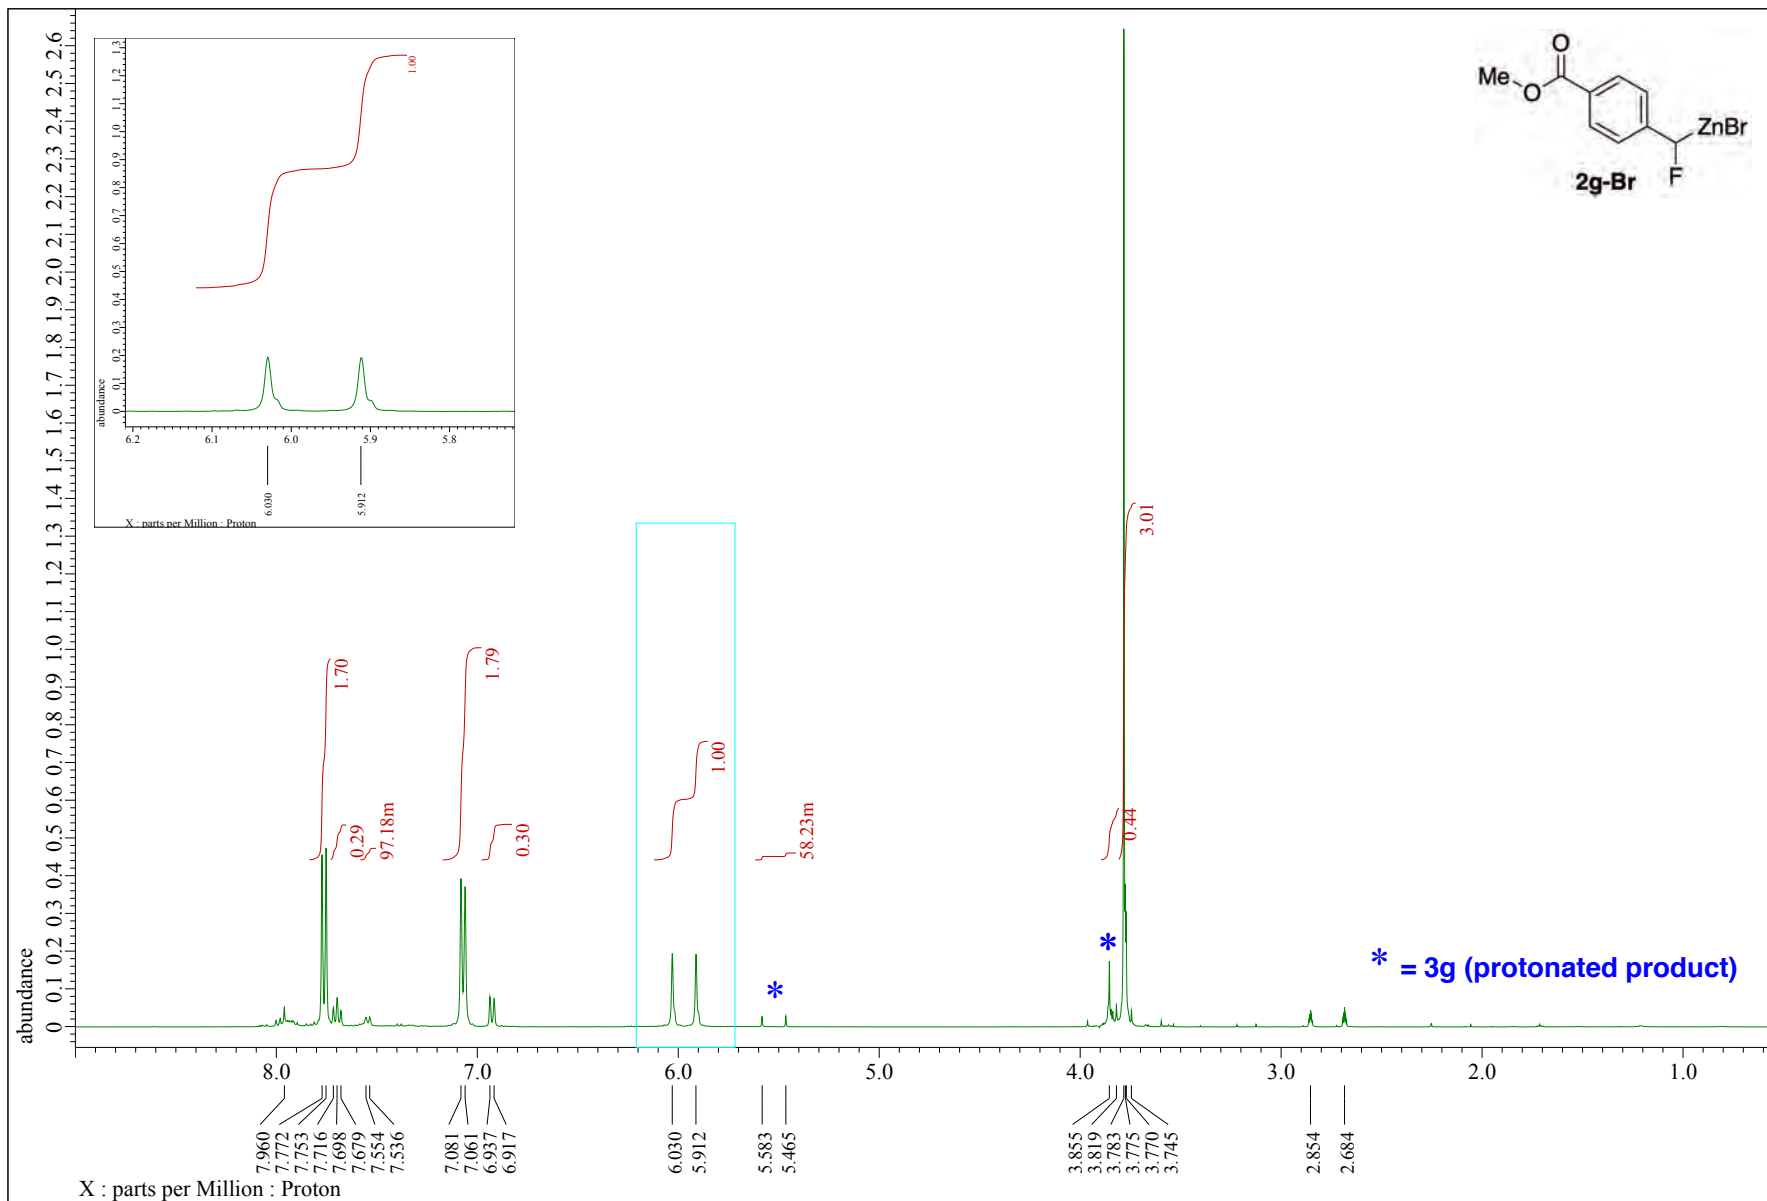

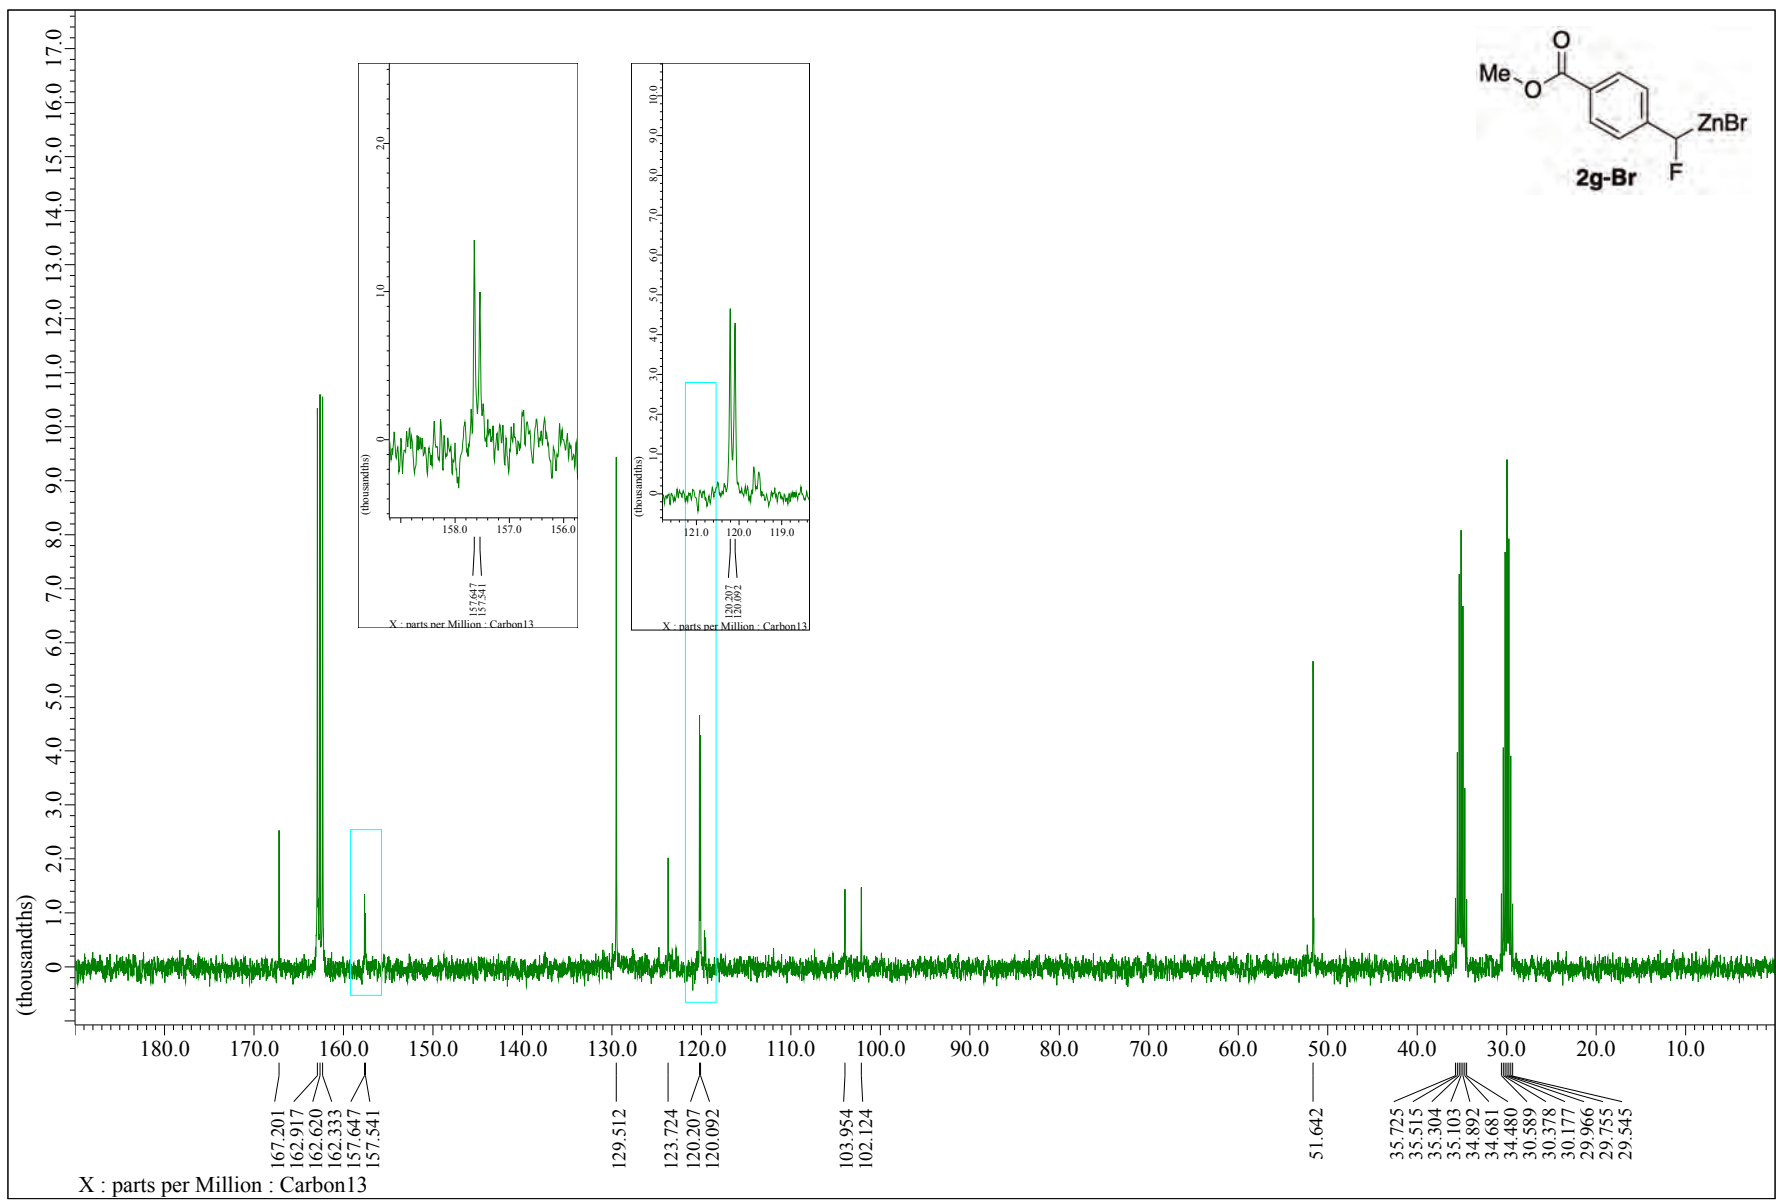

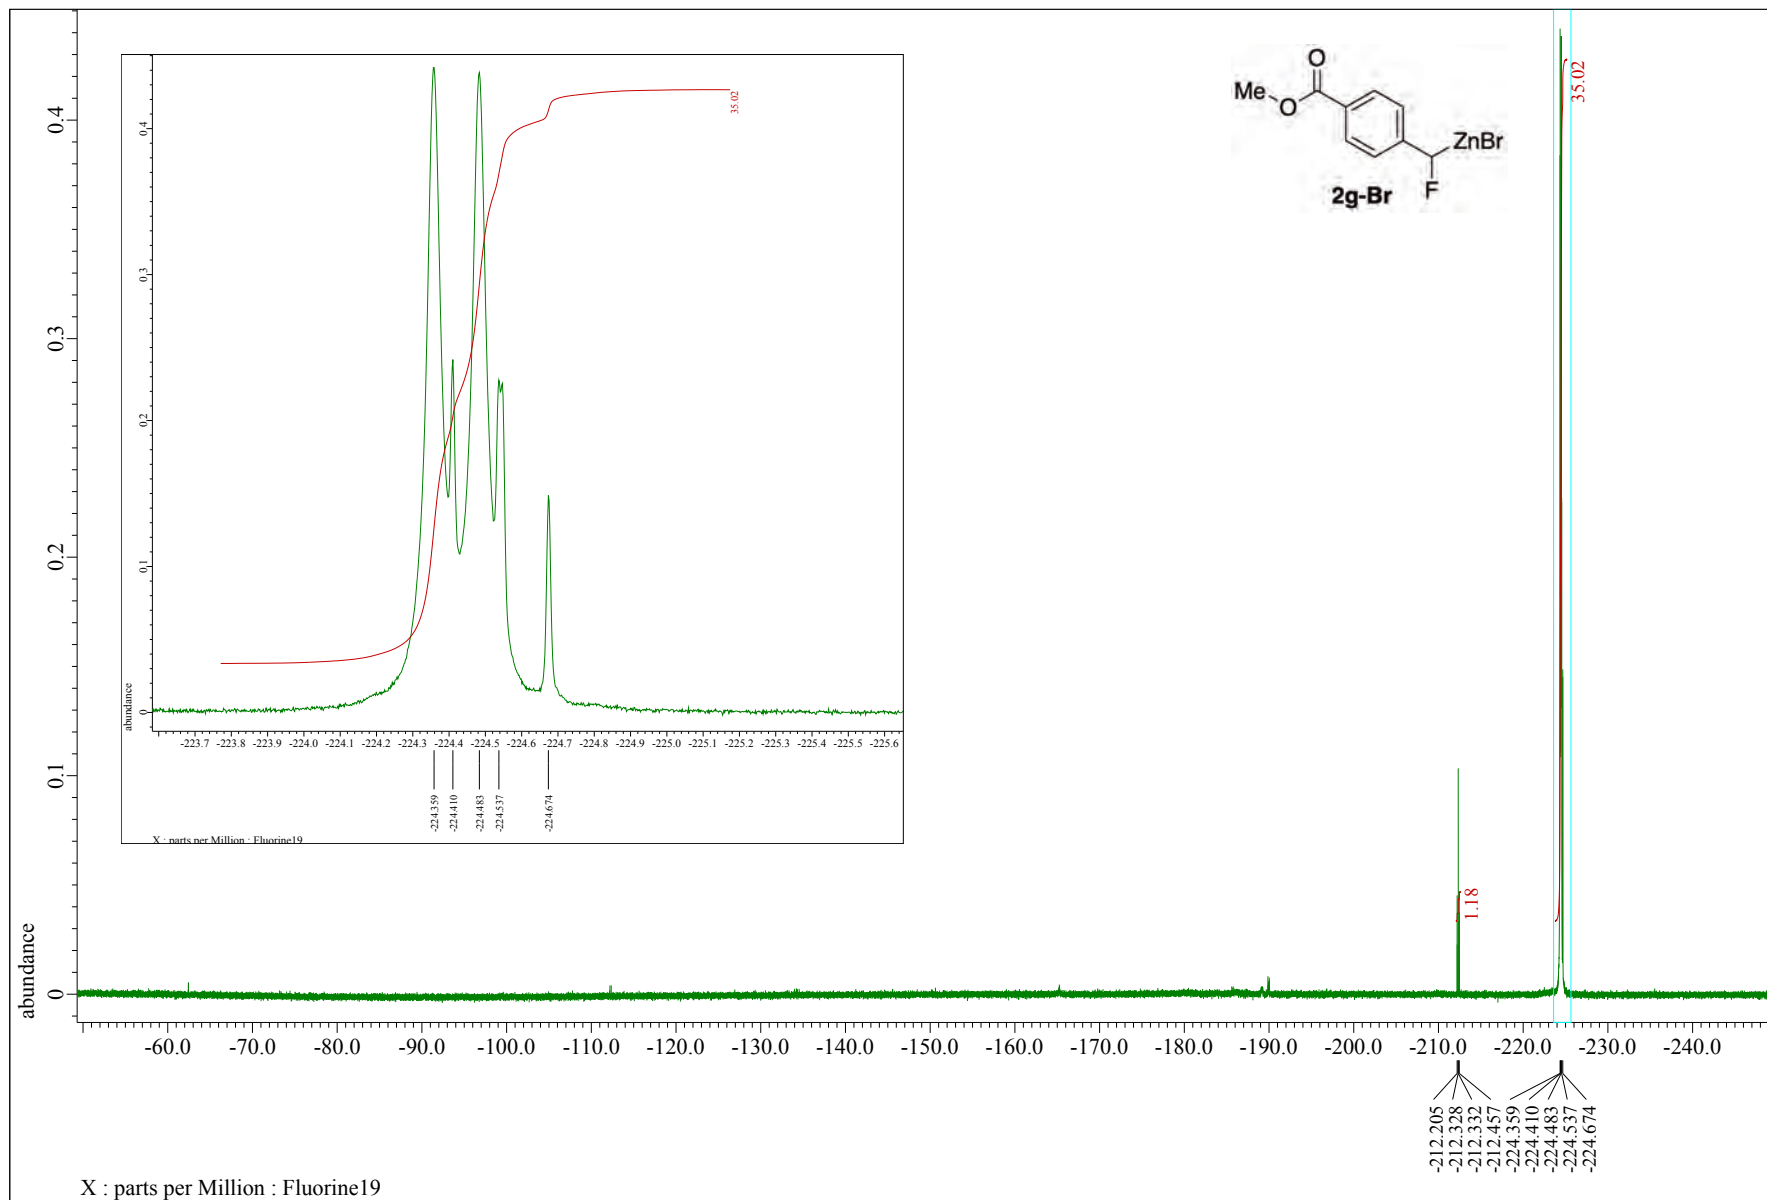

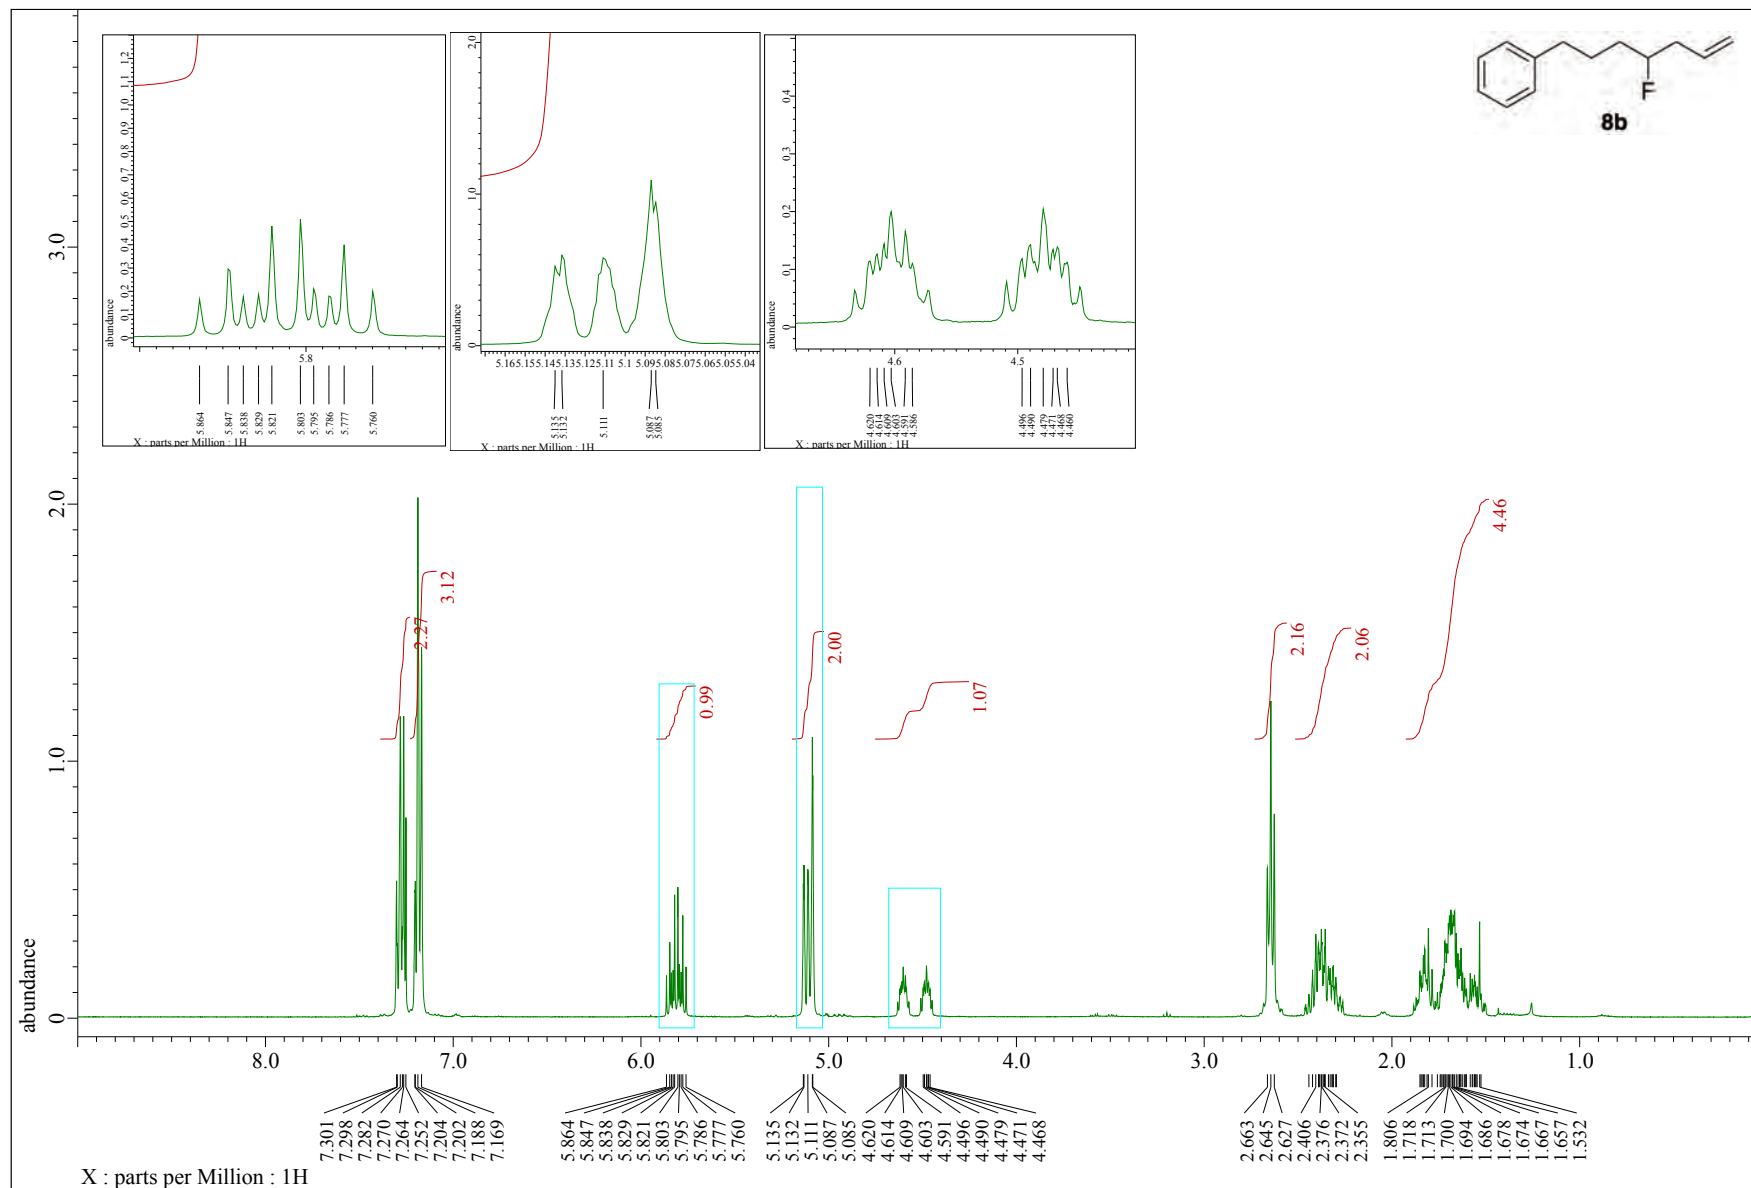

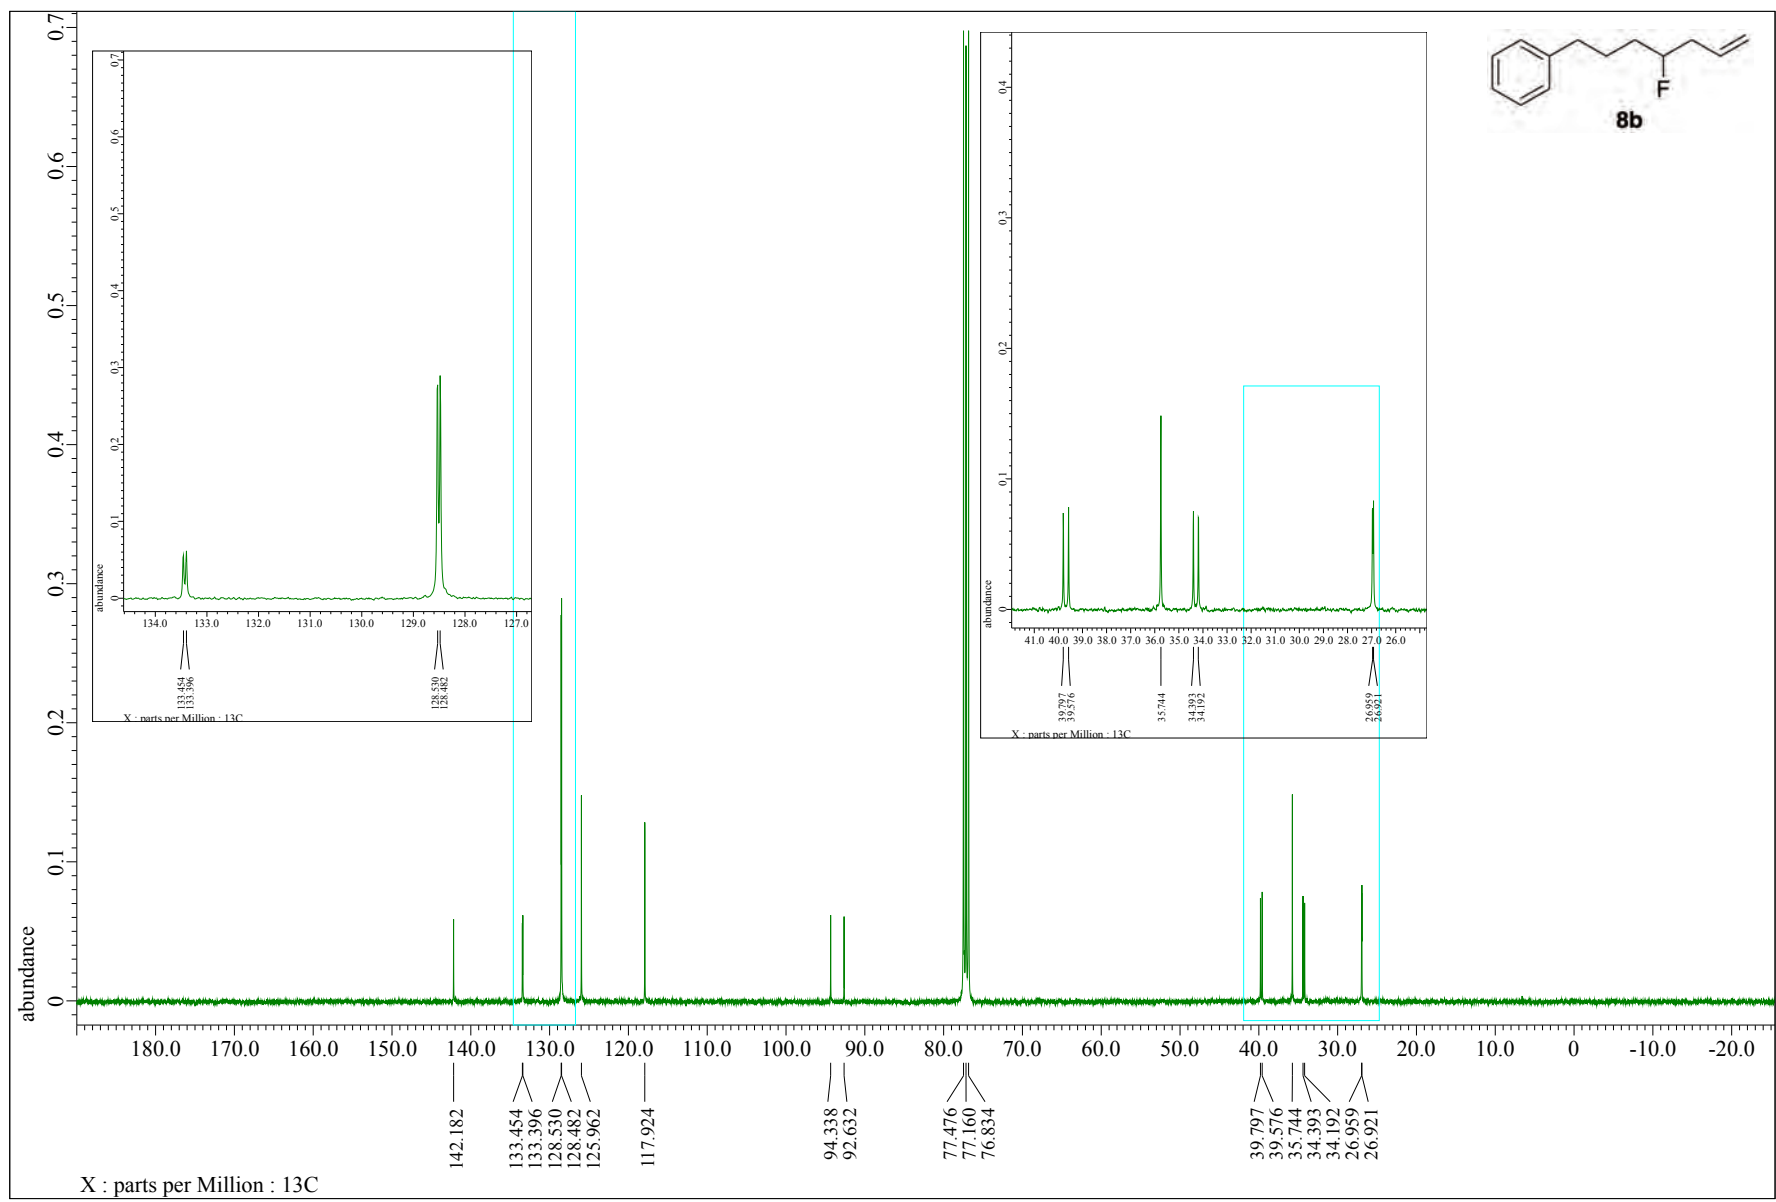

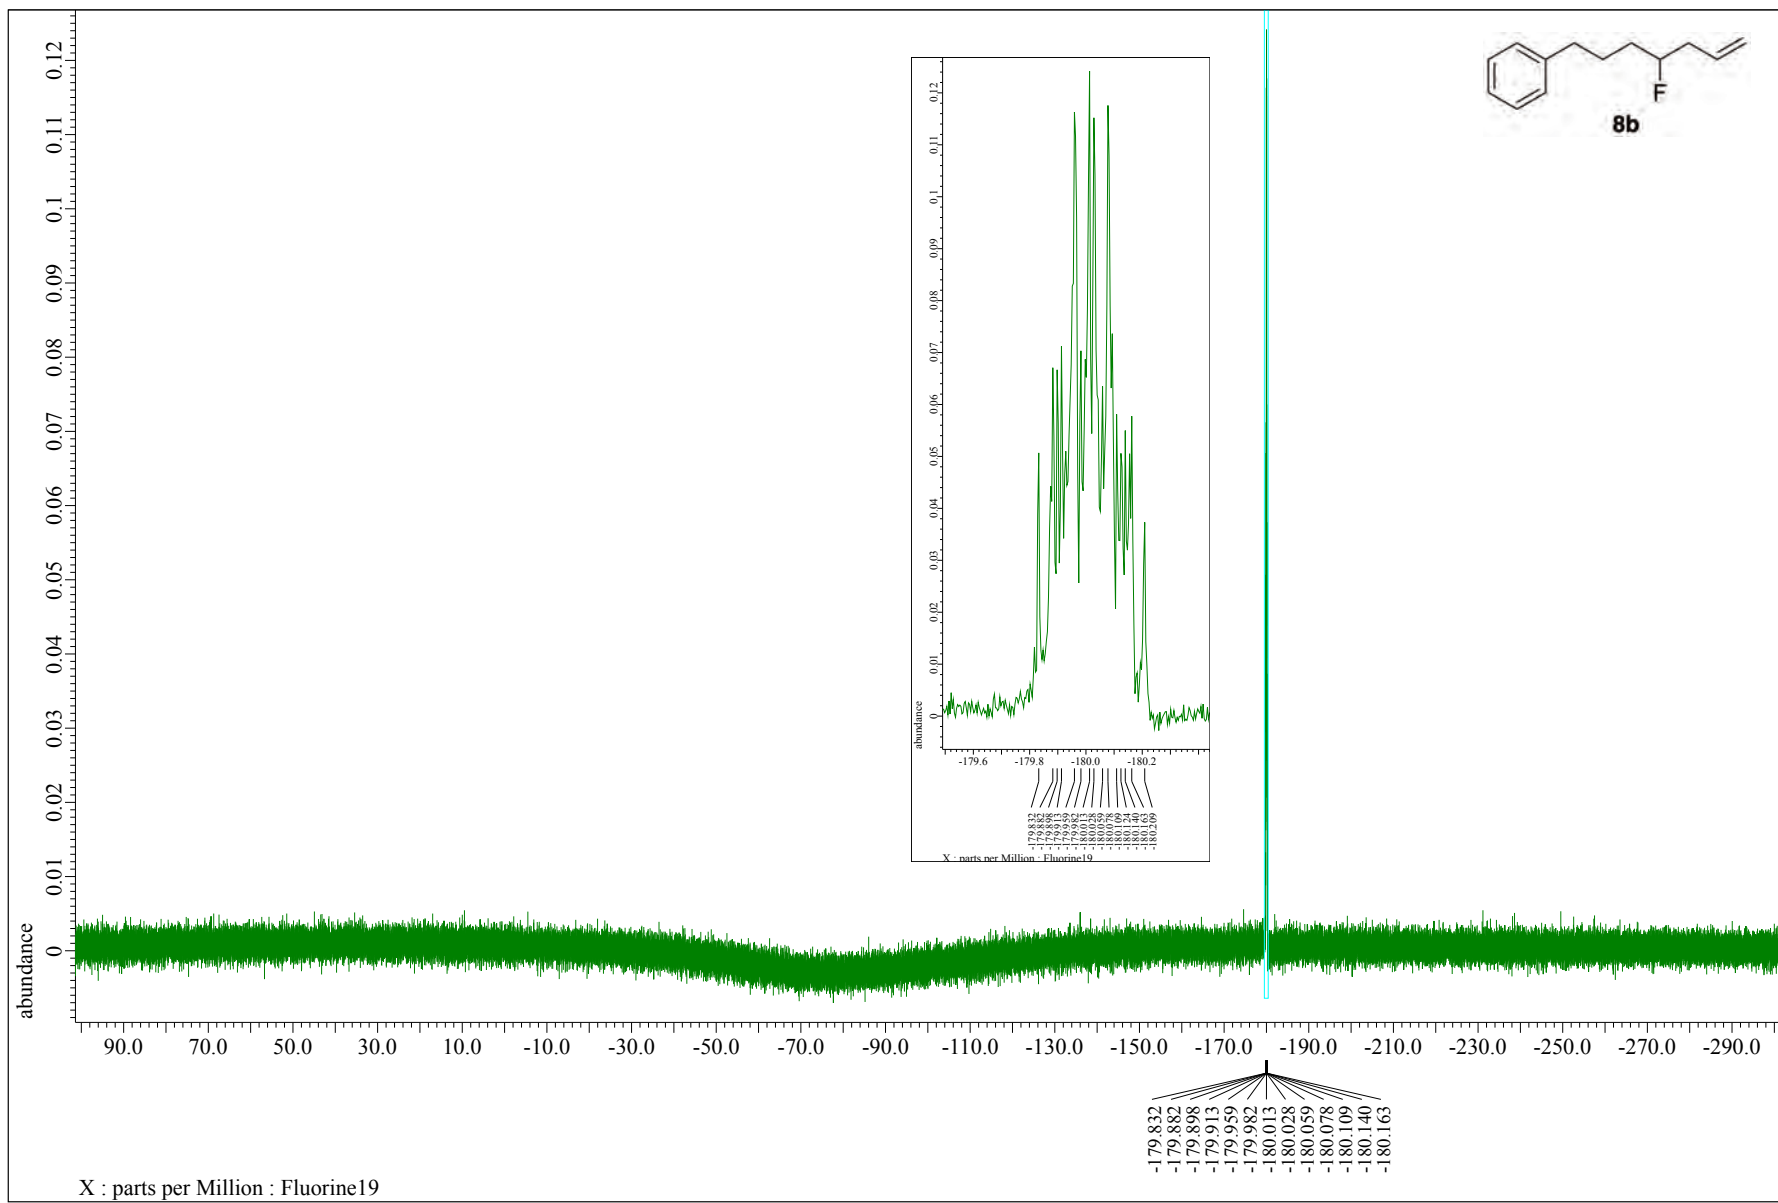

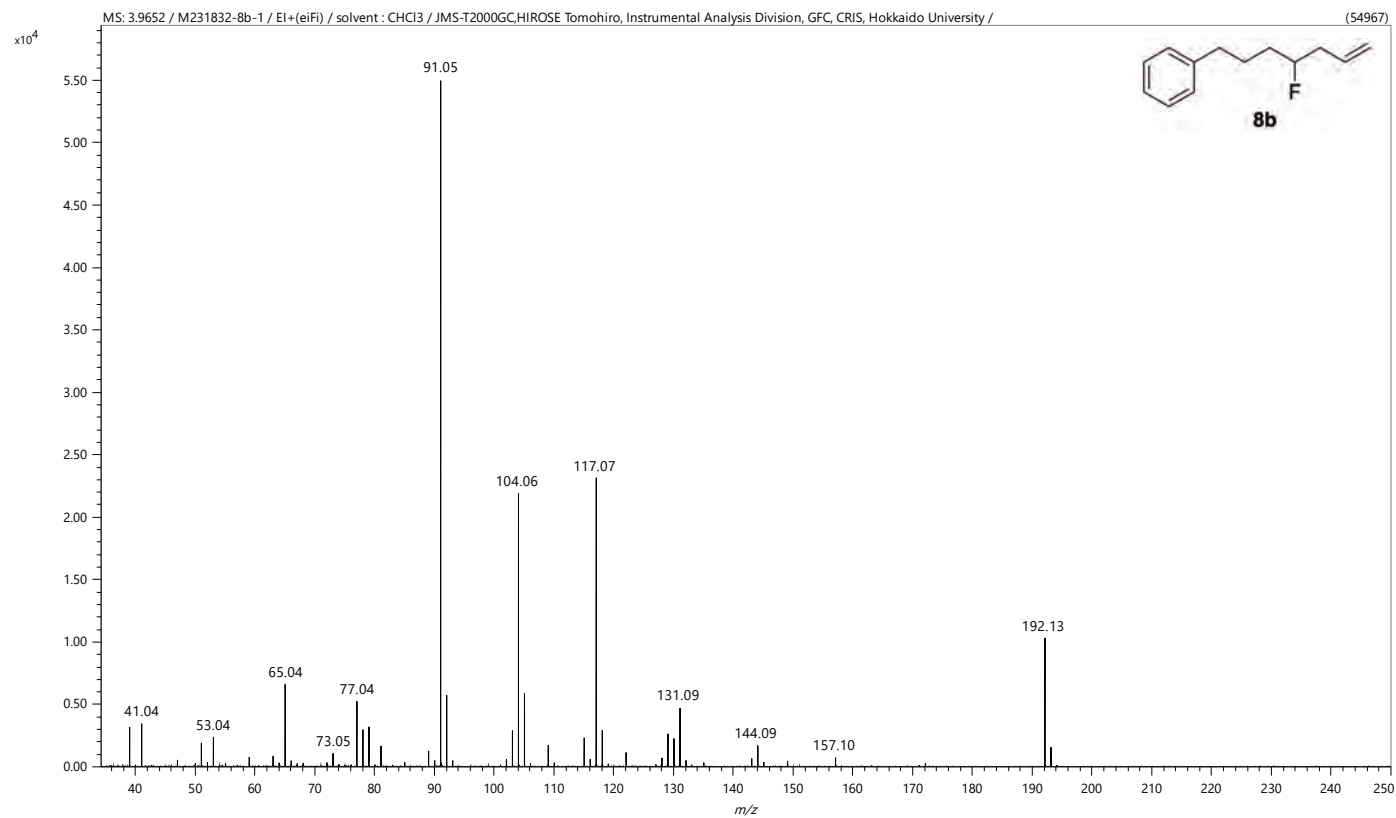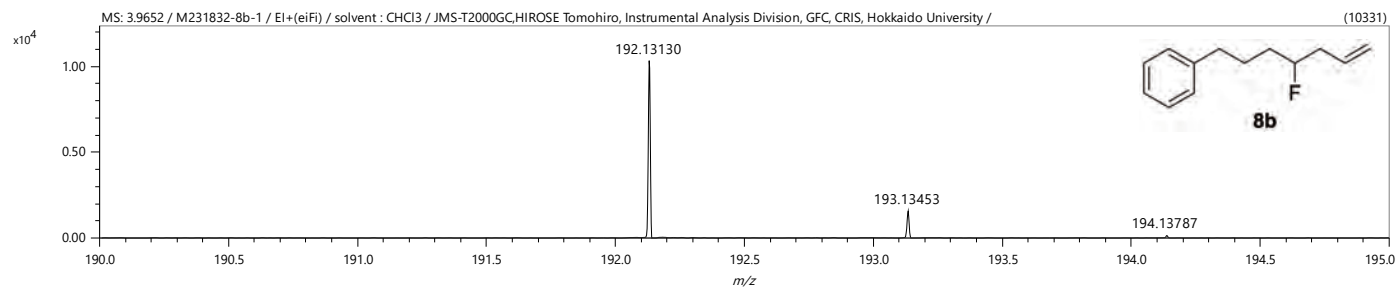



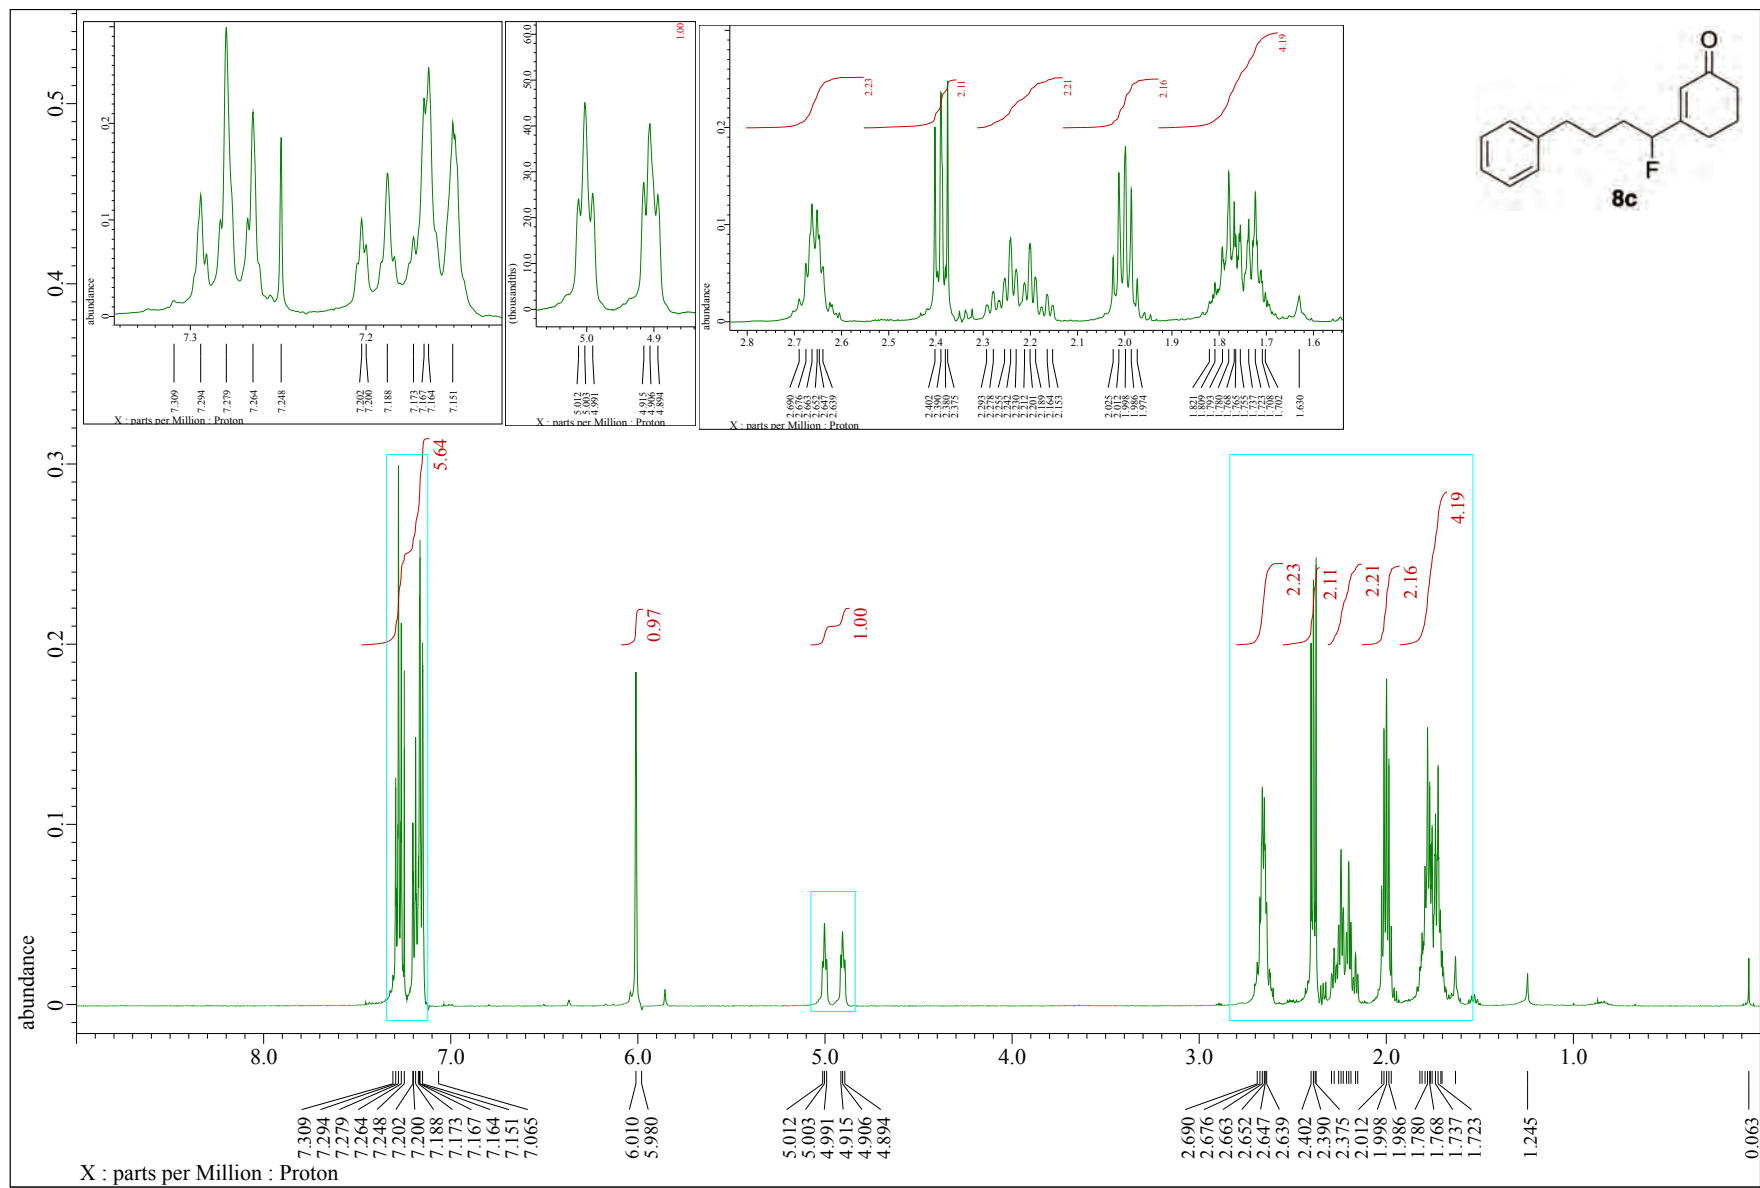

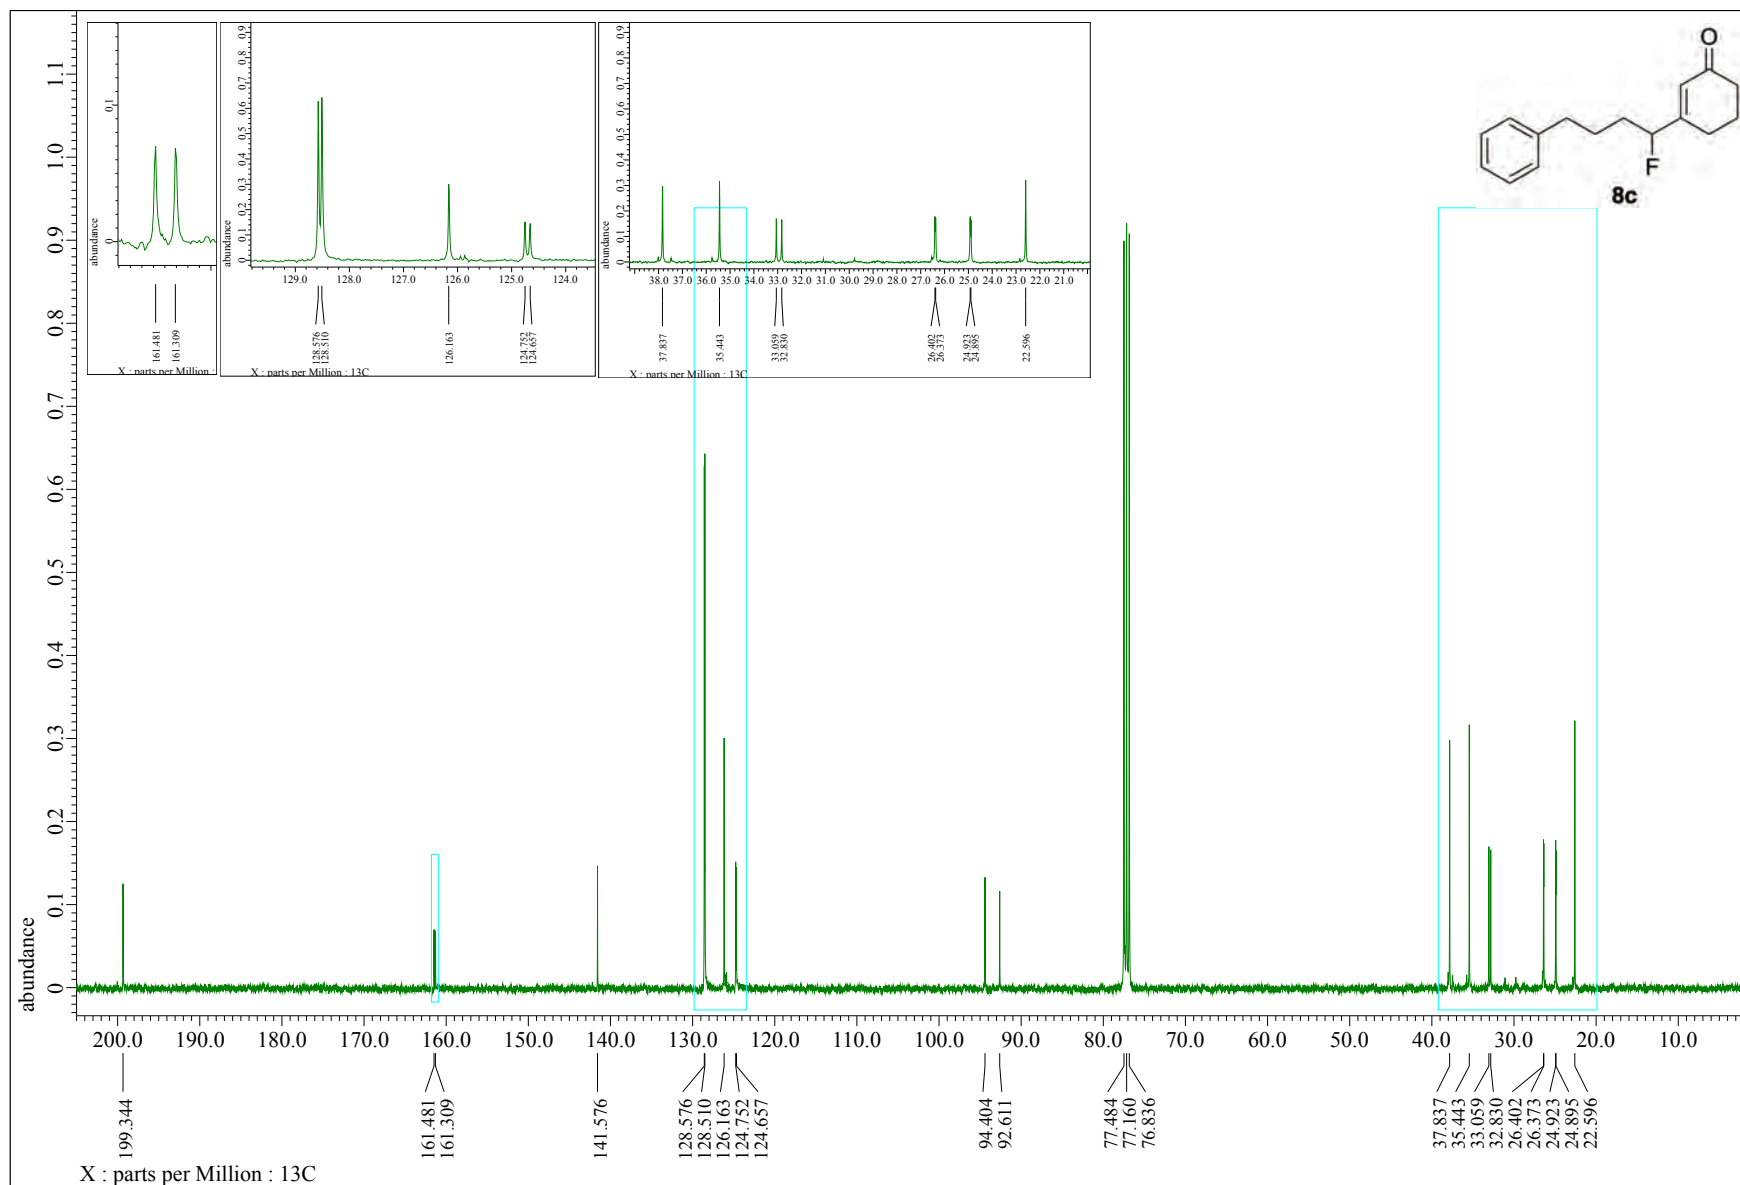

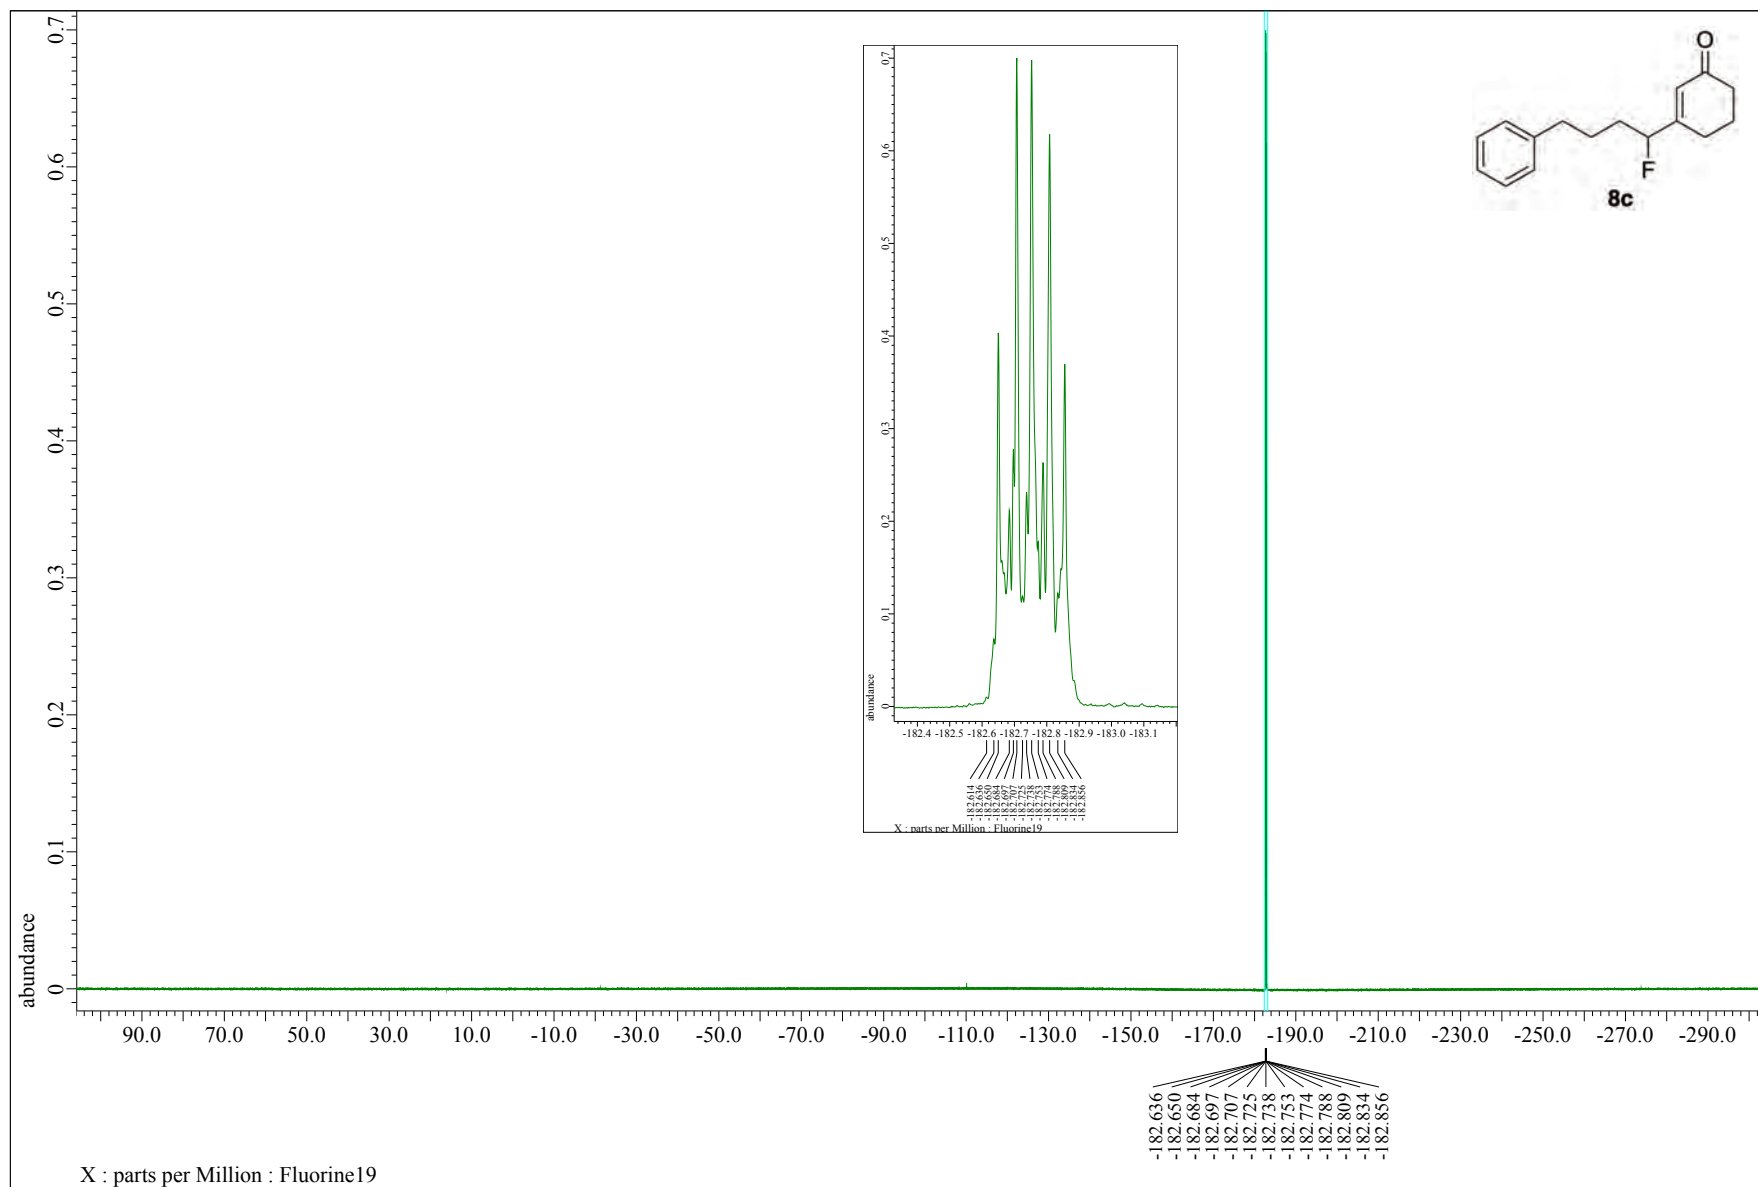

Sample No. : C:\Xcalibur\...BG\_230237\_EK002f \_

Instrument : Exactive Plus

Mobile phase solvent : MeOH

Operator name : hayashi harumi

Sample solvent : CHCl3

Date : 05/17/23 13:39:43

Instrumental method : C:\Xcalibur\methods\ESI\_100ul\S60\_100ul\_mz100\_1500pn.meth

Instrumental Analysis Division, Global Facility Center, Creative Research Institution, Hokkaido University

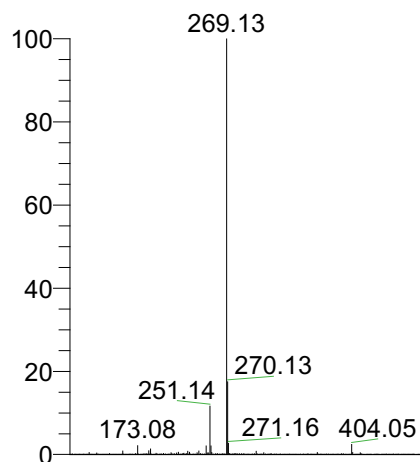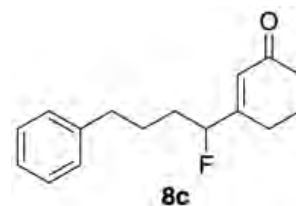

NL: 7.11E8  
BG\_230237\_EK0028by  
\_pn#18-32 RT:  
0.31-0.48 AV: 7 T:  
FTMS + c ESI Full ms  
[100.00-1500.00]

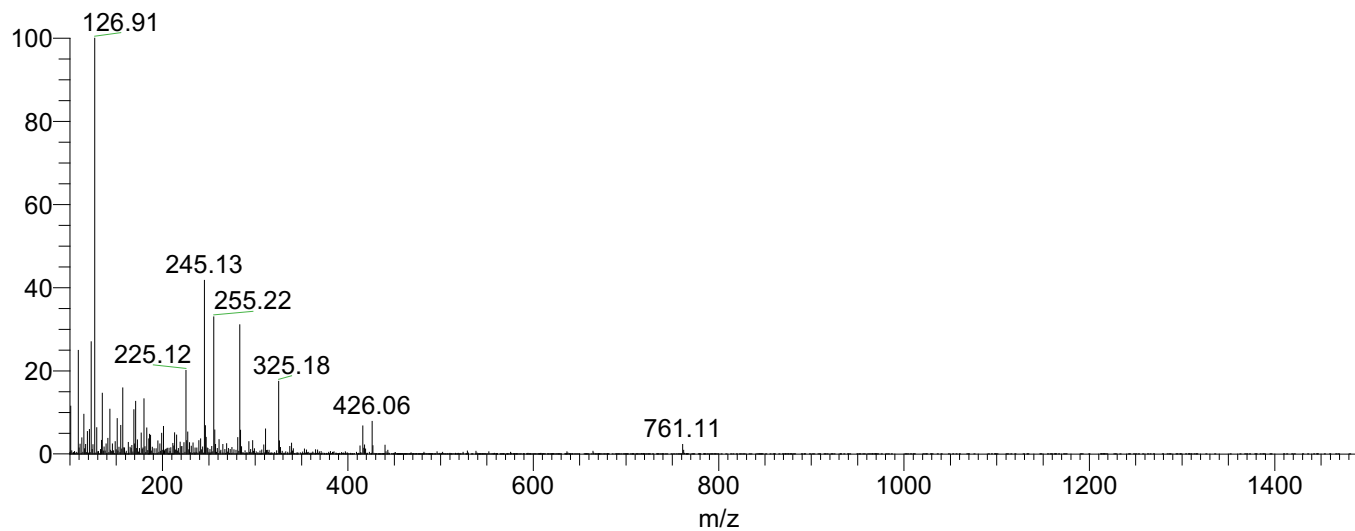

NL: 2.22E7  
BG\_230237\_EK0028by  
\_pn#18-32 RT:  
0.30-0.50 AV: 8 T:  
FTMS - c ESI Full ms  
[100.00-1500.00]

Sample No. : C:\Xcalibur\...10517\202307\_EK0028by\_pn

Instrument : Exactive Plus

Mobile phase solvent : MeOH

Operator name : hayashi harumi

Sample solvent : CHCl3

Date : 05/17/23 11:32:01

Instrumental method : C:\Xcalibur\methods\ESI\_100ul\S60\_100ul\_mz100\_1500pn.meth

Instrumental Analysis Division, Global Facility Center, Creative Research Institution, Hokkaido University

230237\_EK0028by\_pn #22-25 RT: 0.37-0.40 AV: 2 NL: 1.79E8

T: FTMS + p ESI Full ms [100.0000-1500.0000]

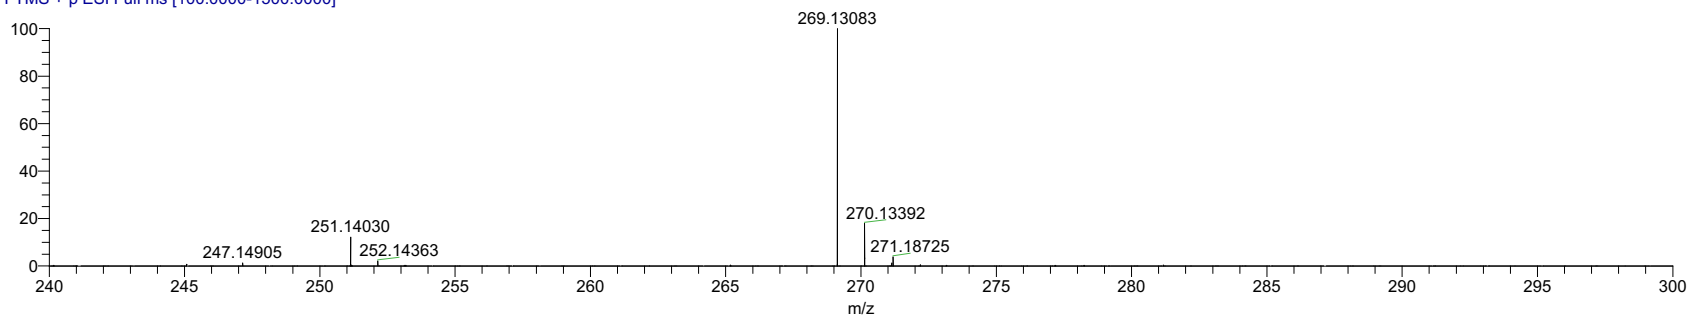

230237\_EK0028by\_pn #25-29 RT: 0.40-0.45 AV: 3 NL: 2.61E8

T: FTMS + p ESI Full ms [100.0000-1500.0000]

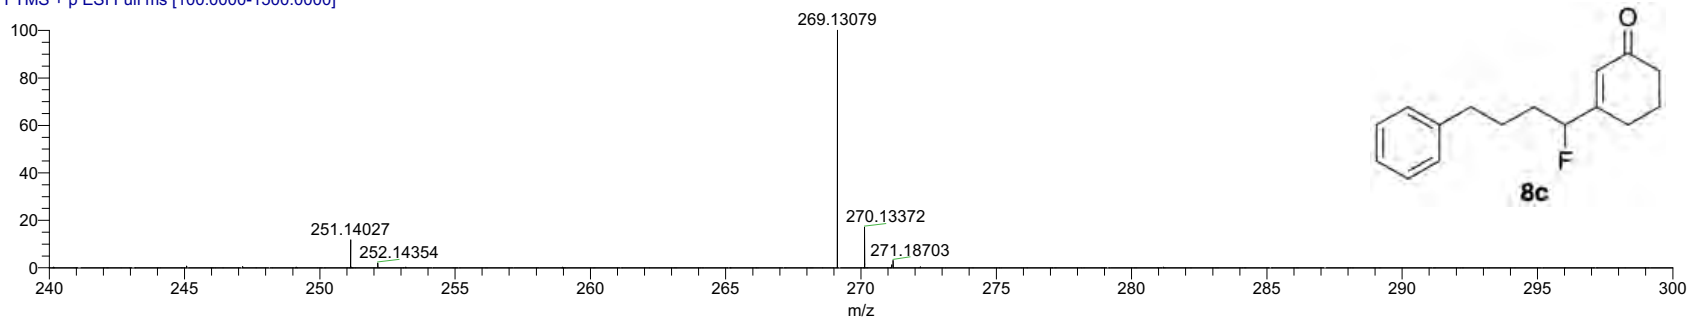

230237\_EK0028by\_pn #29-32 RT: 0.45-0.48 AV: 2 NL: 2.69E8

T: FTMS + p ESI Full ms [100.0000-1500.0000]

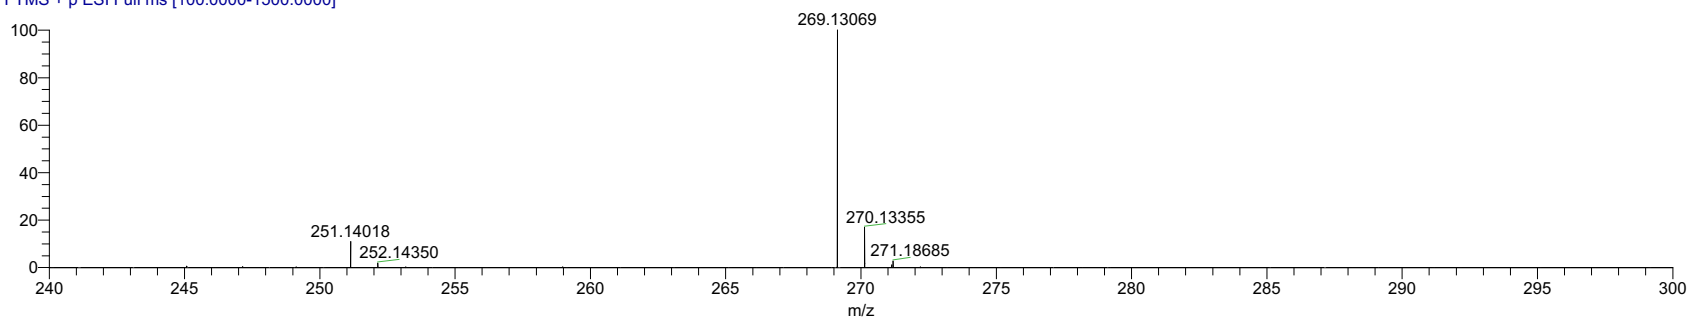

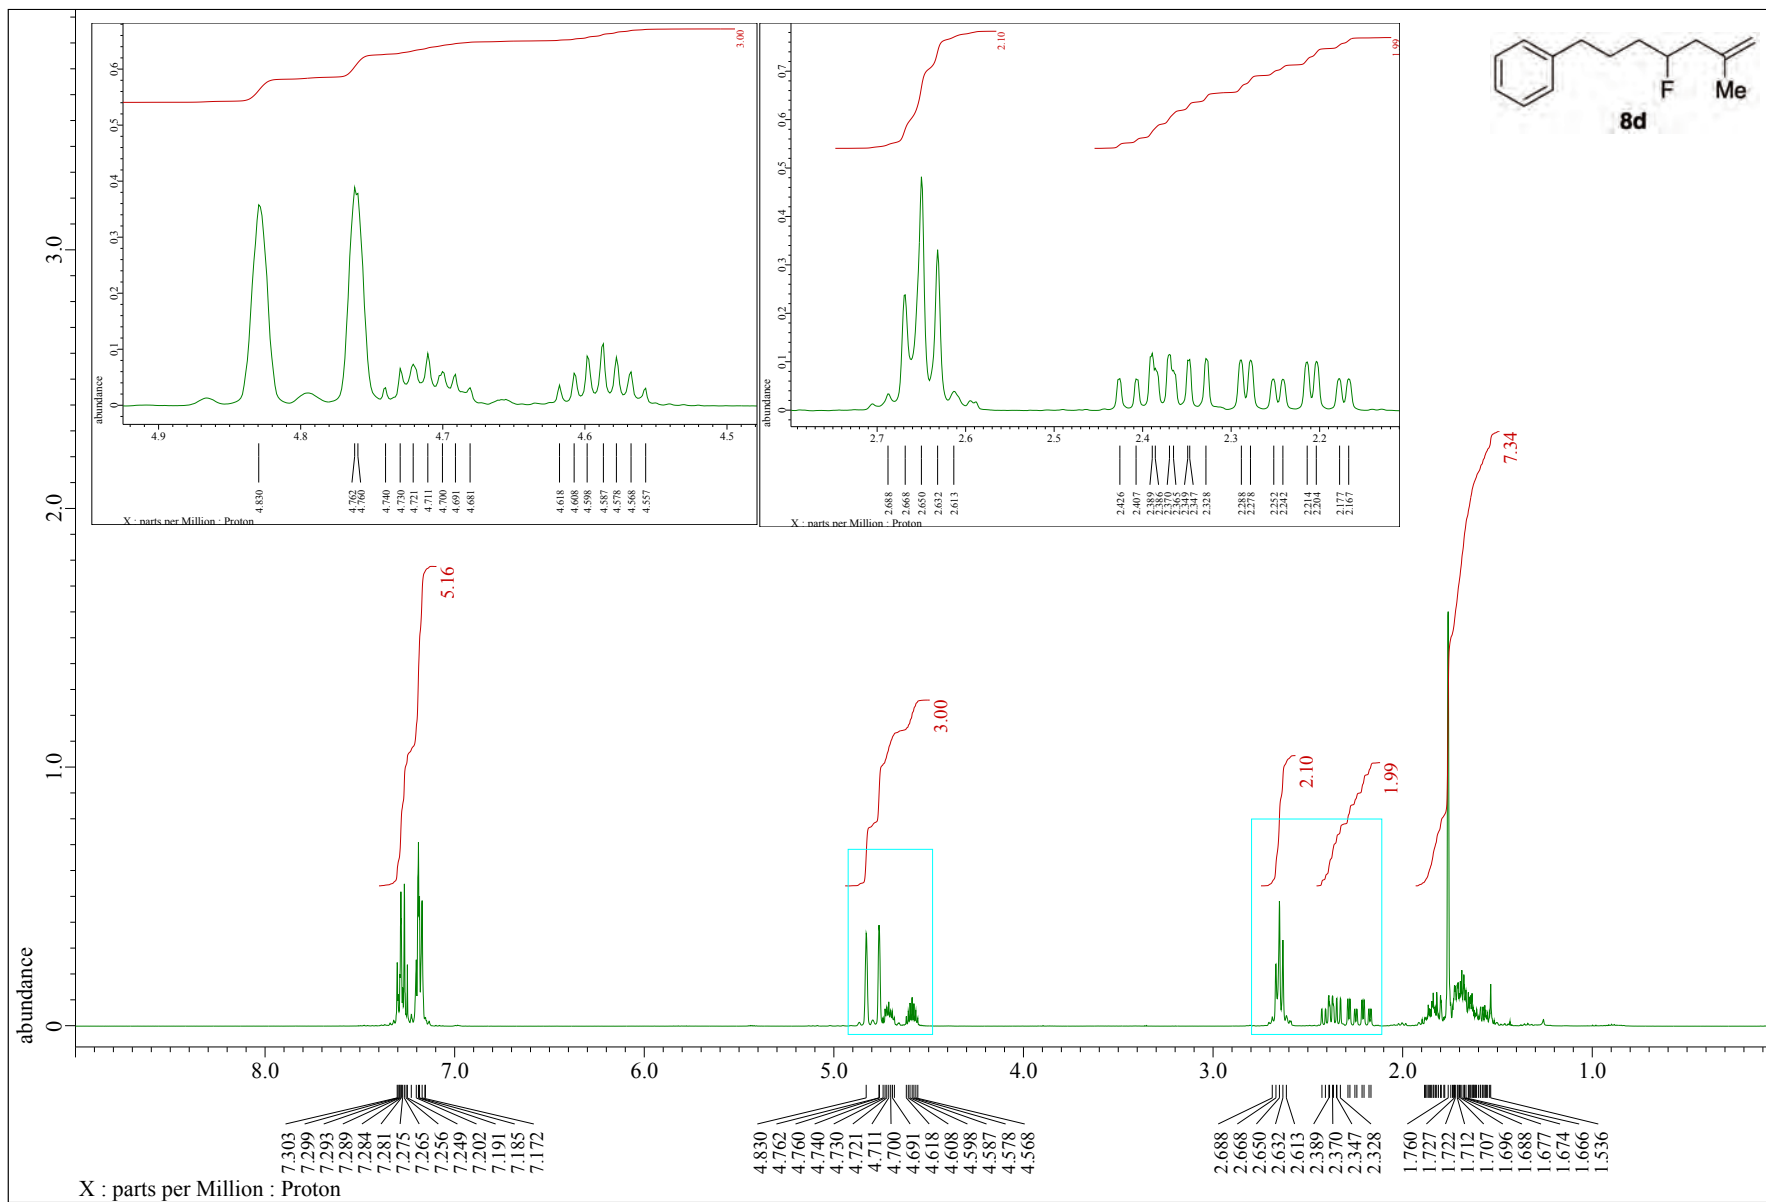

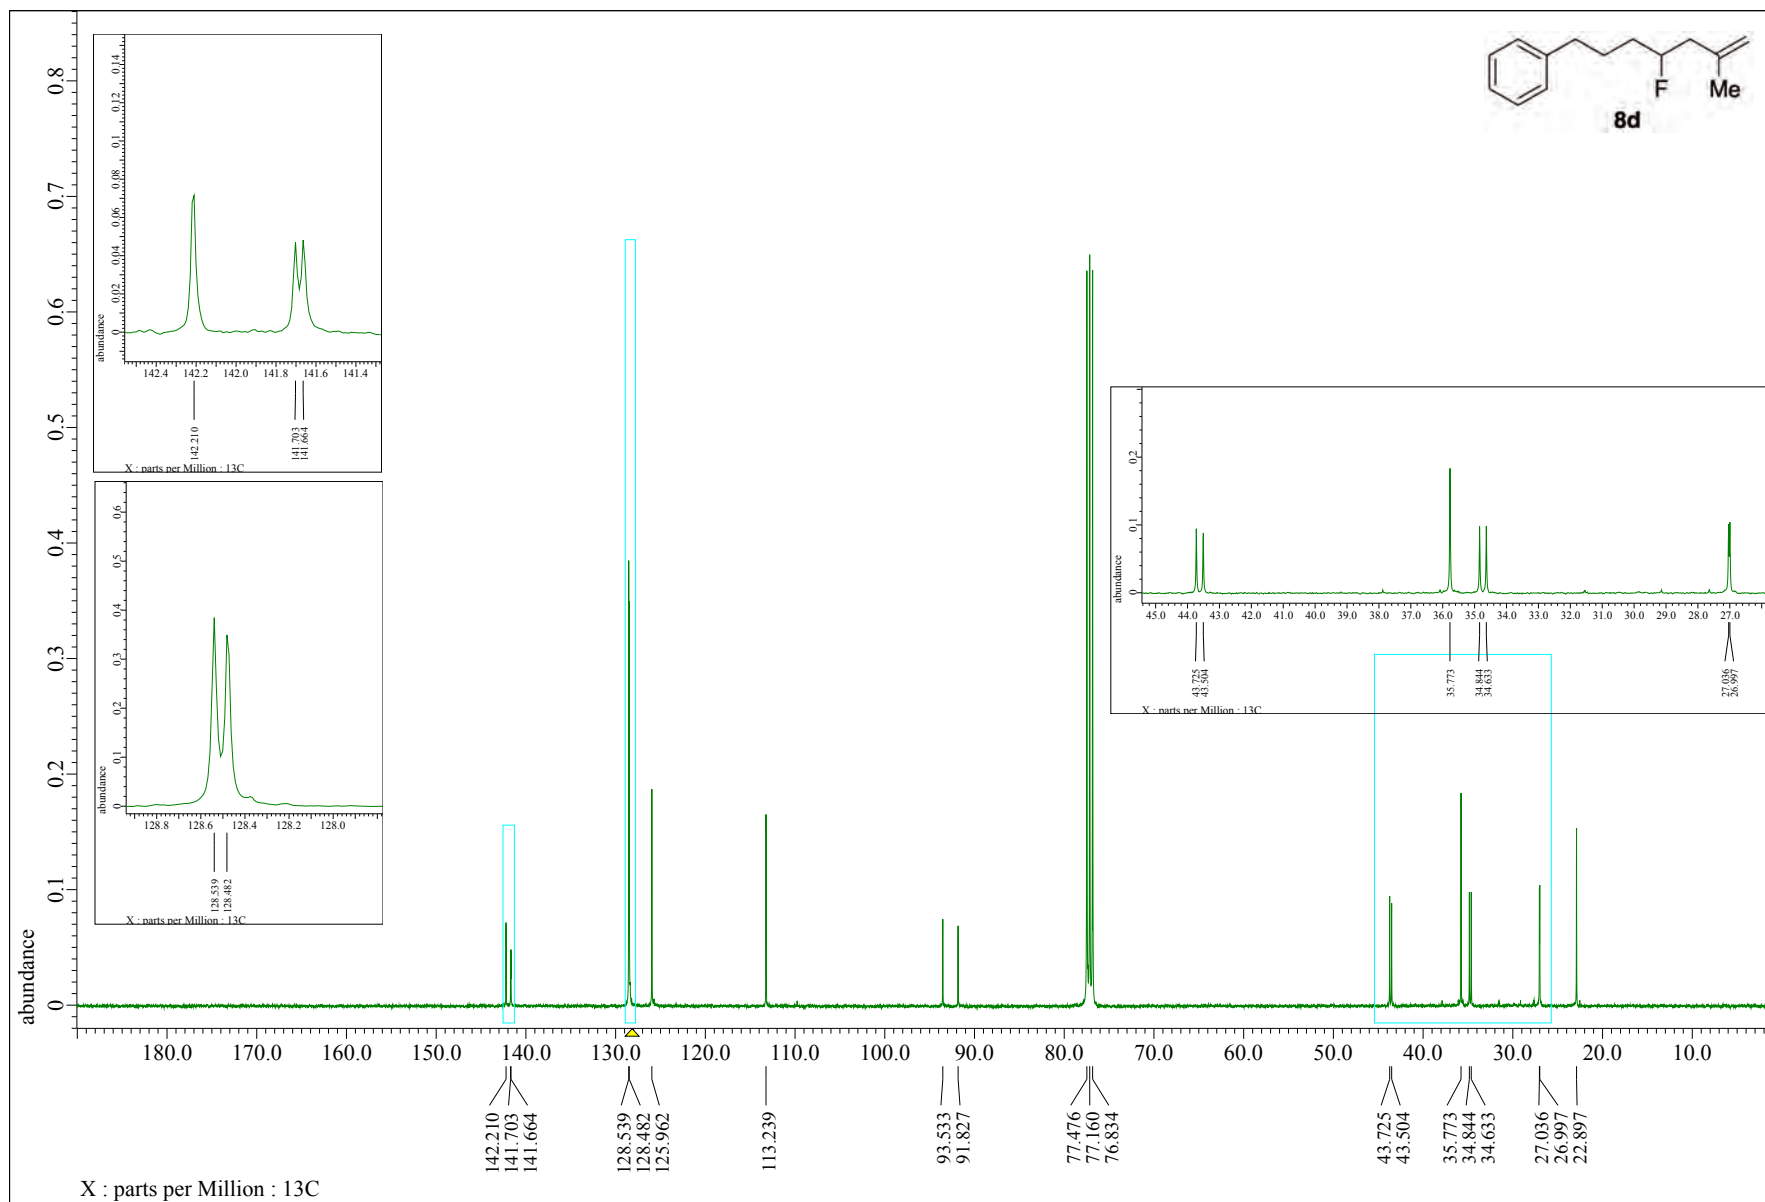

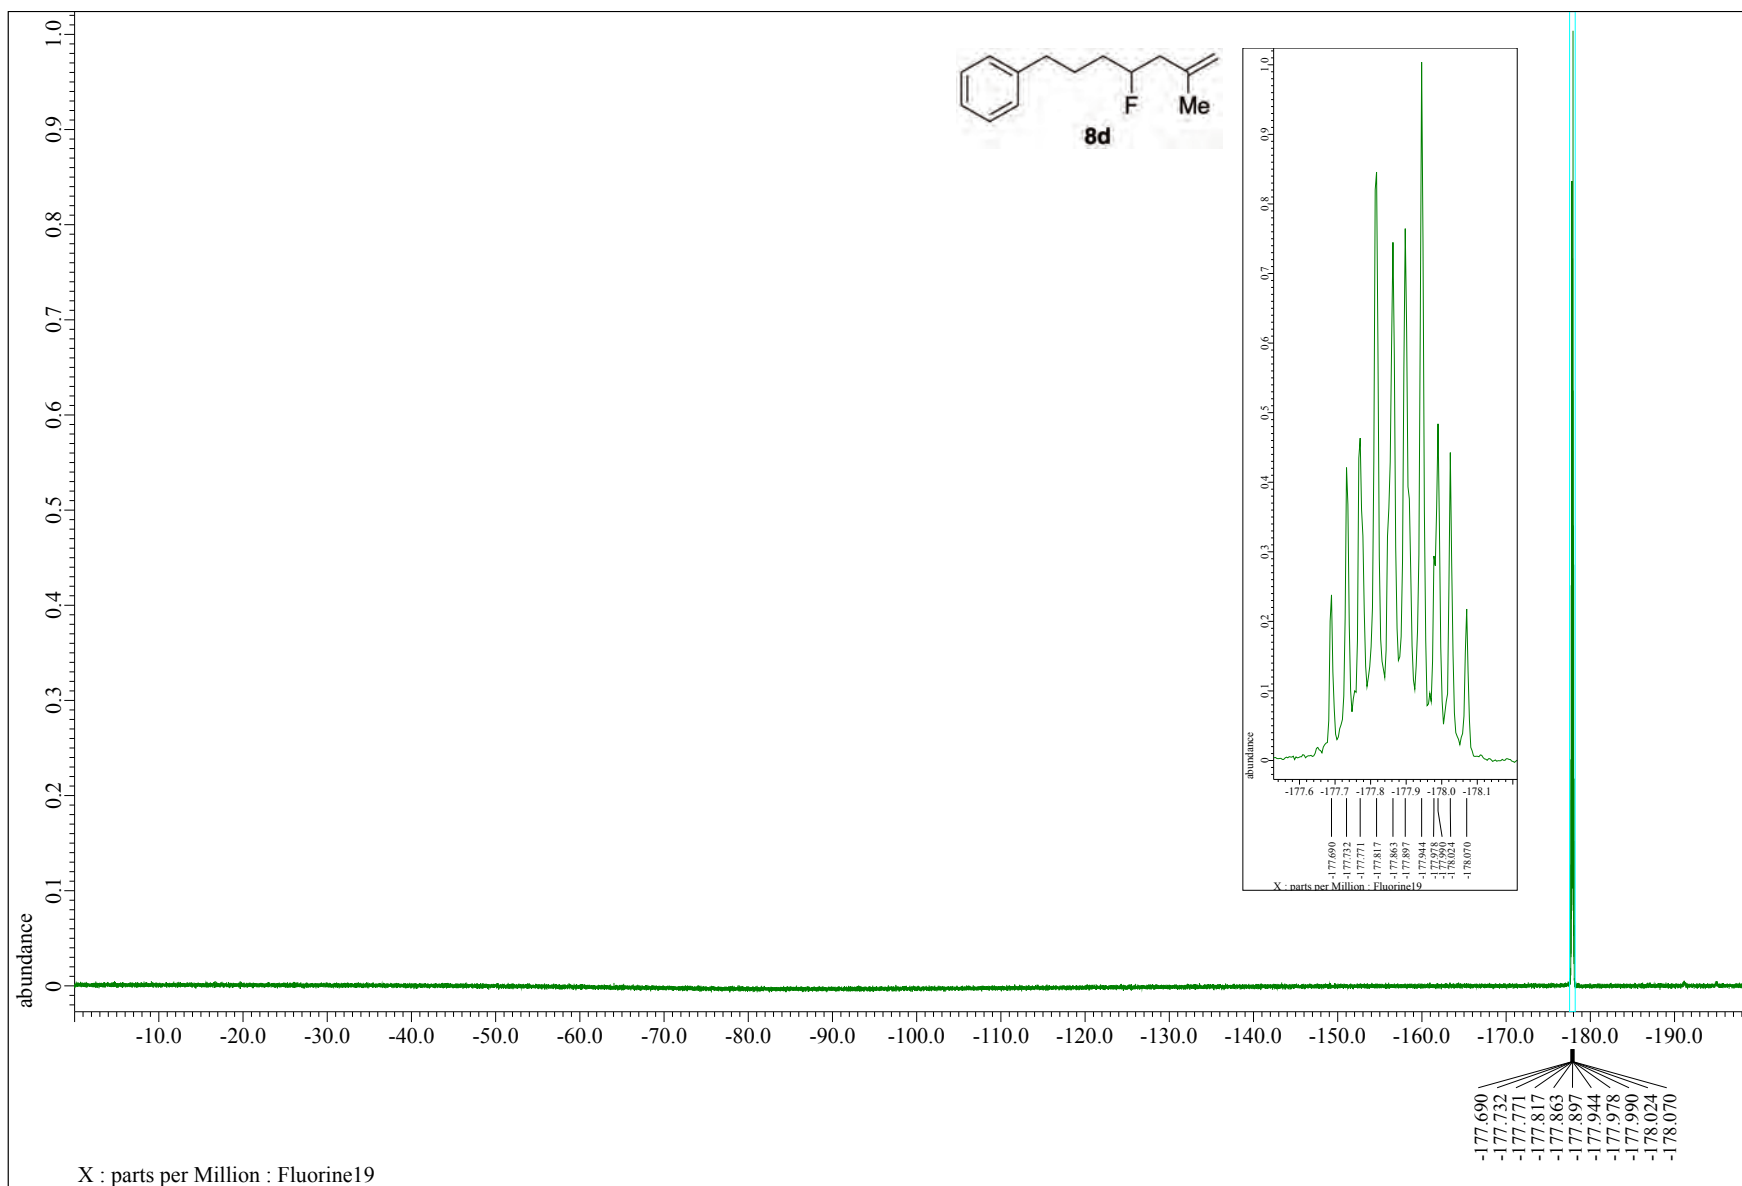



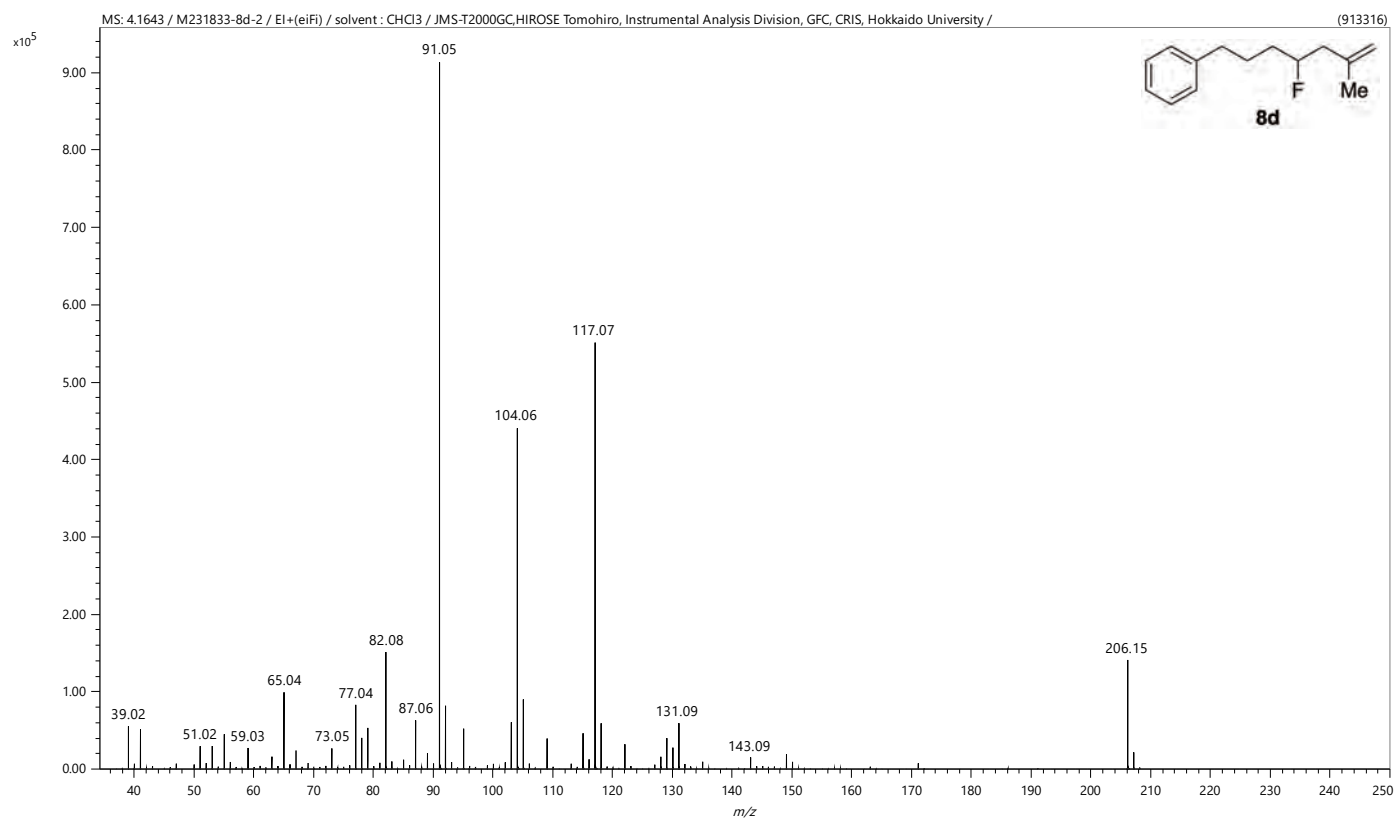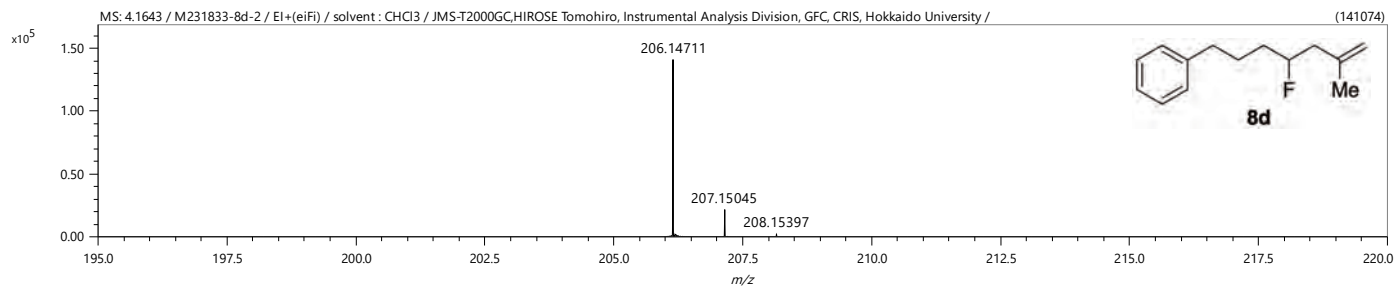

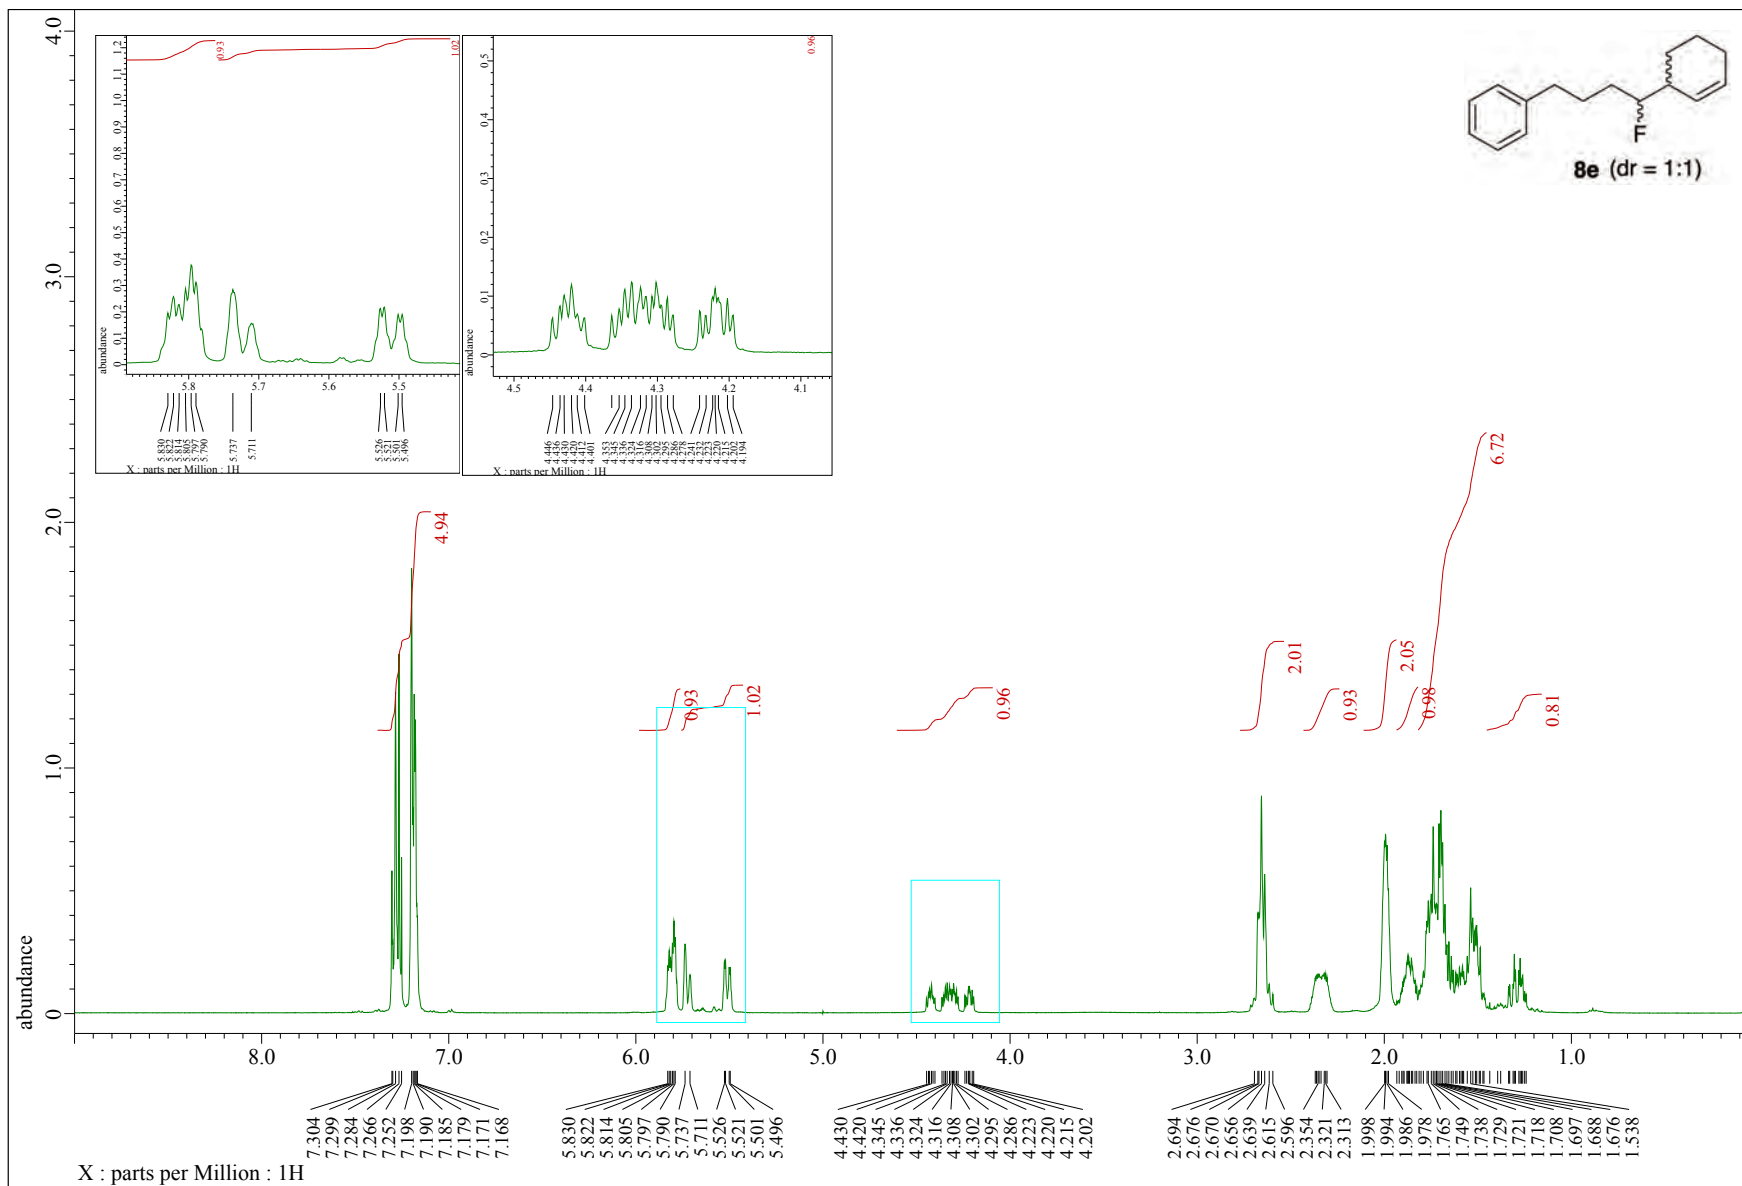

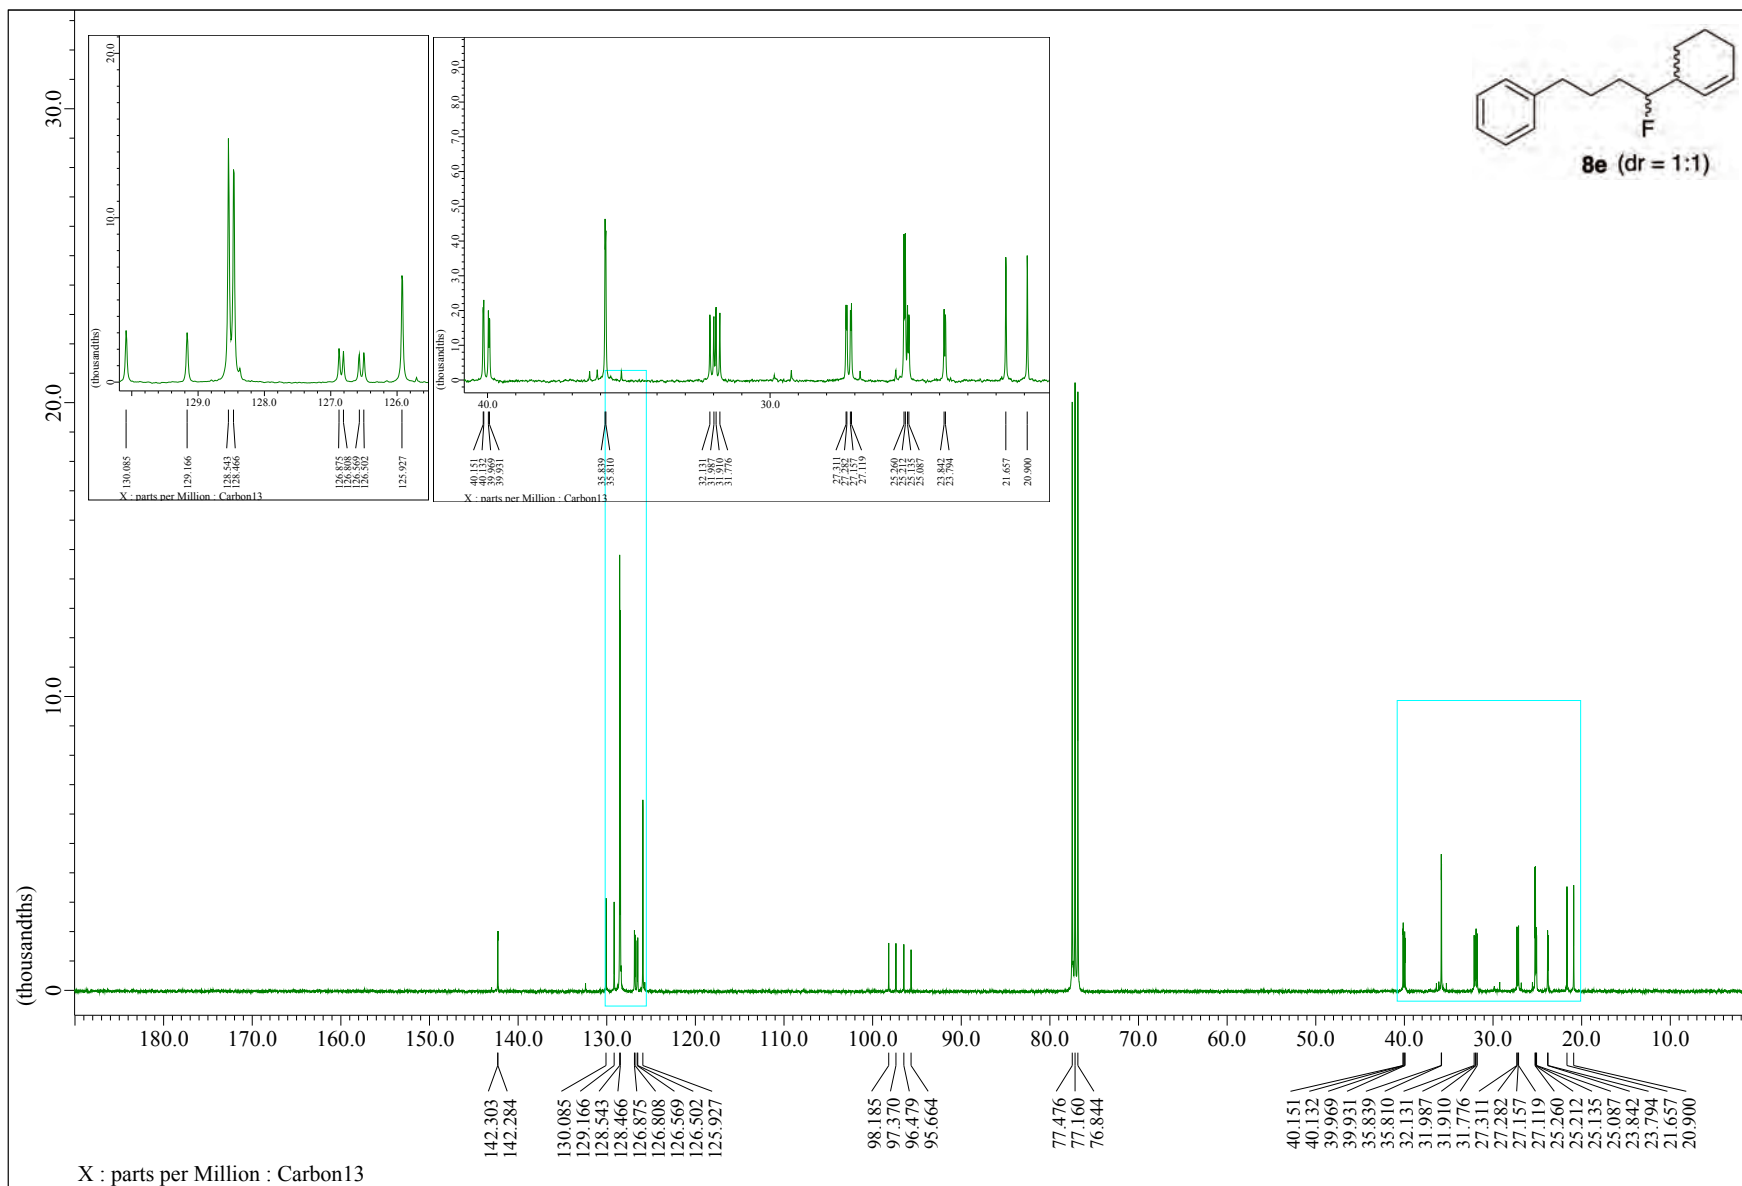

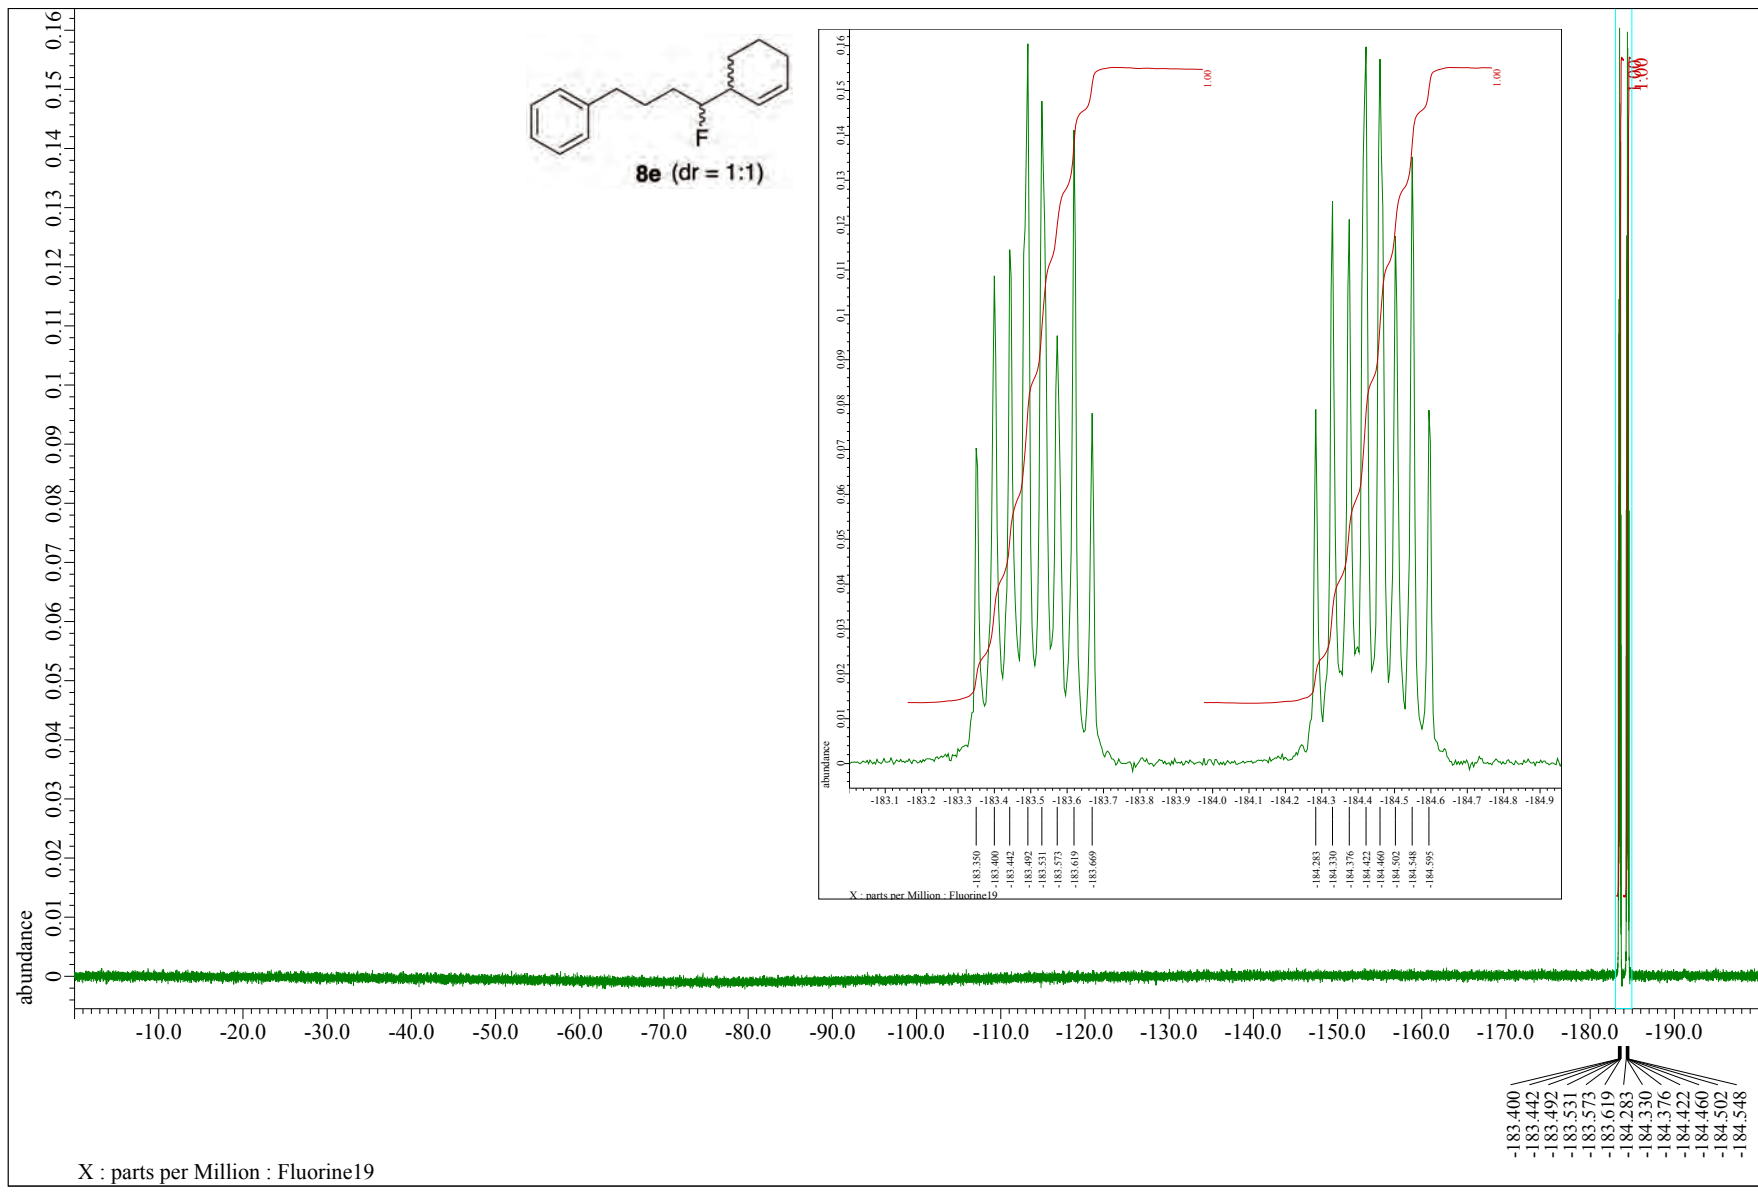

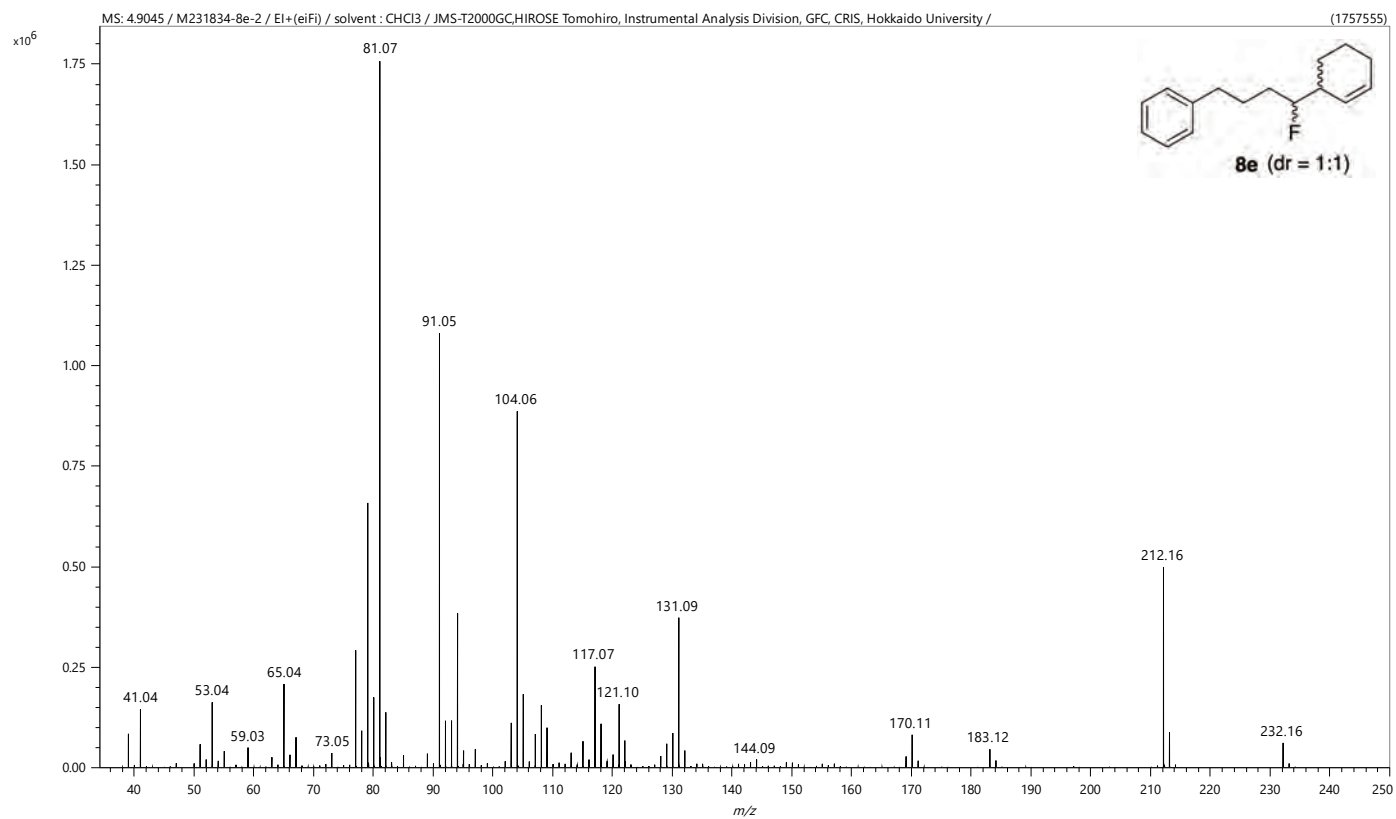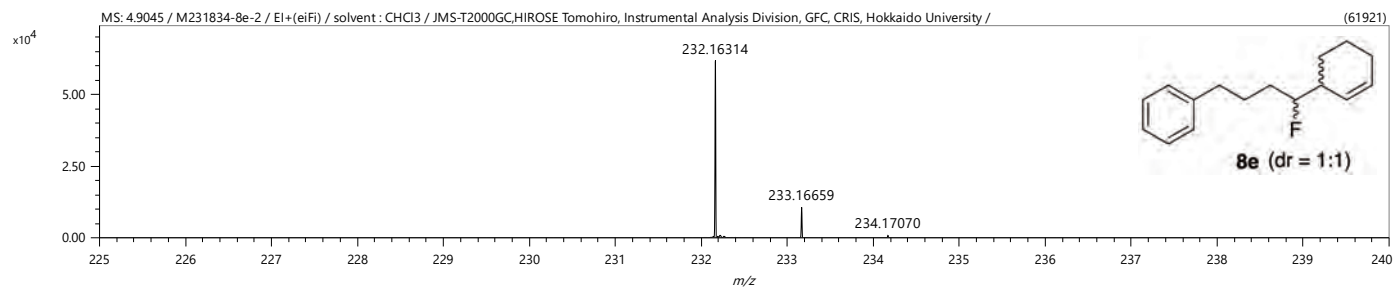

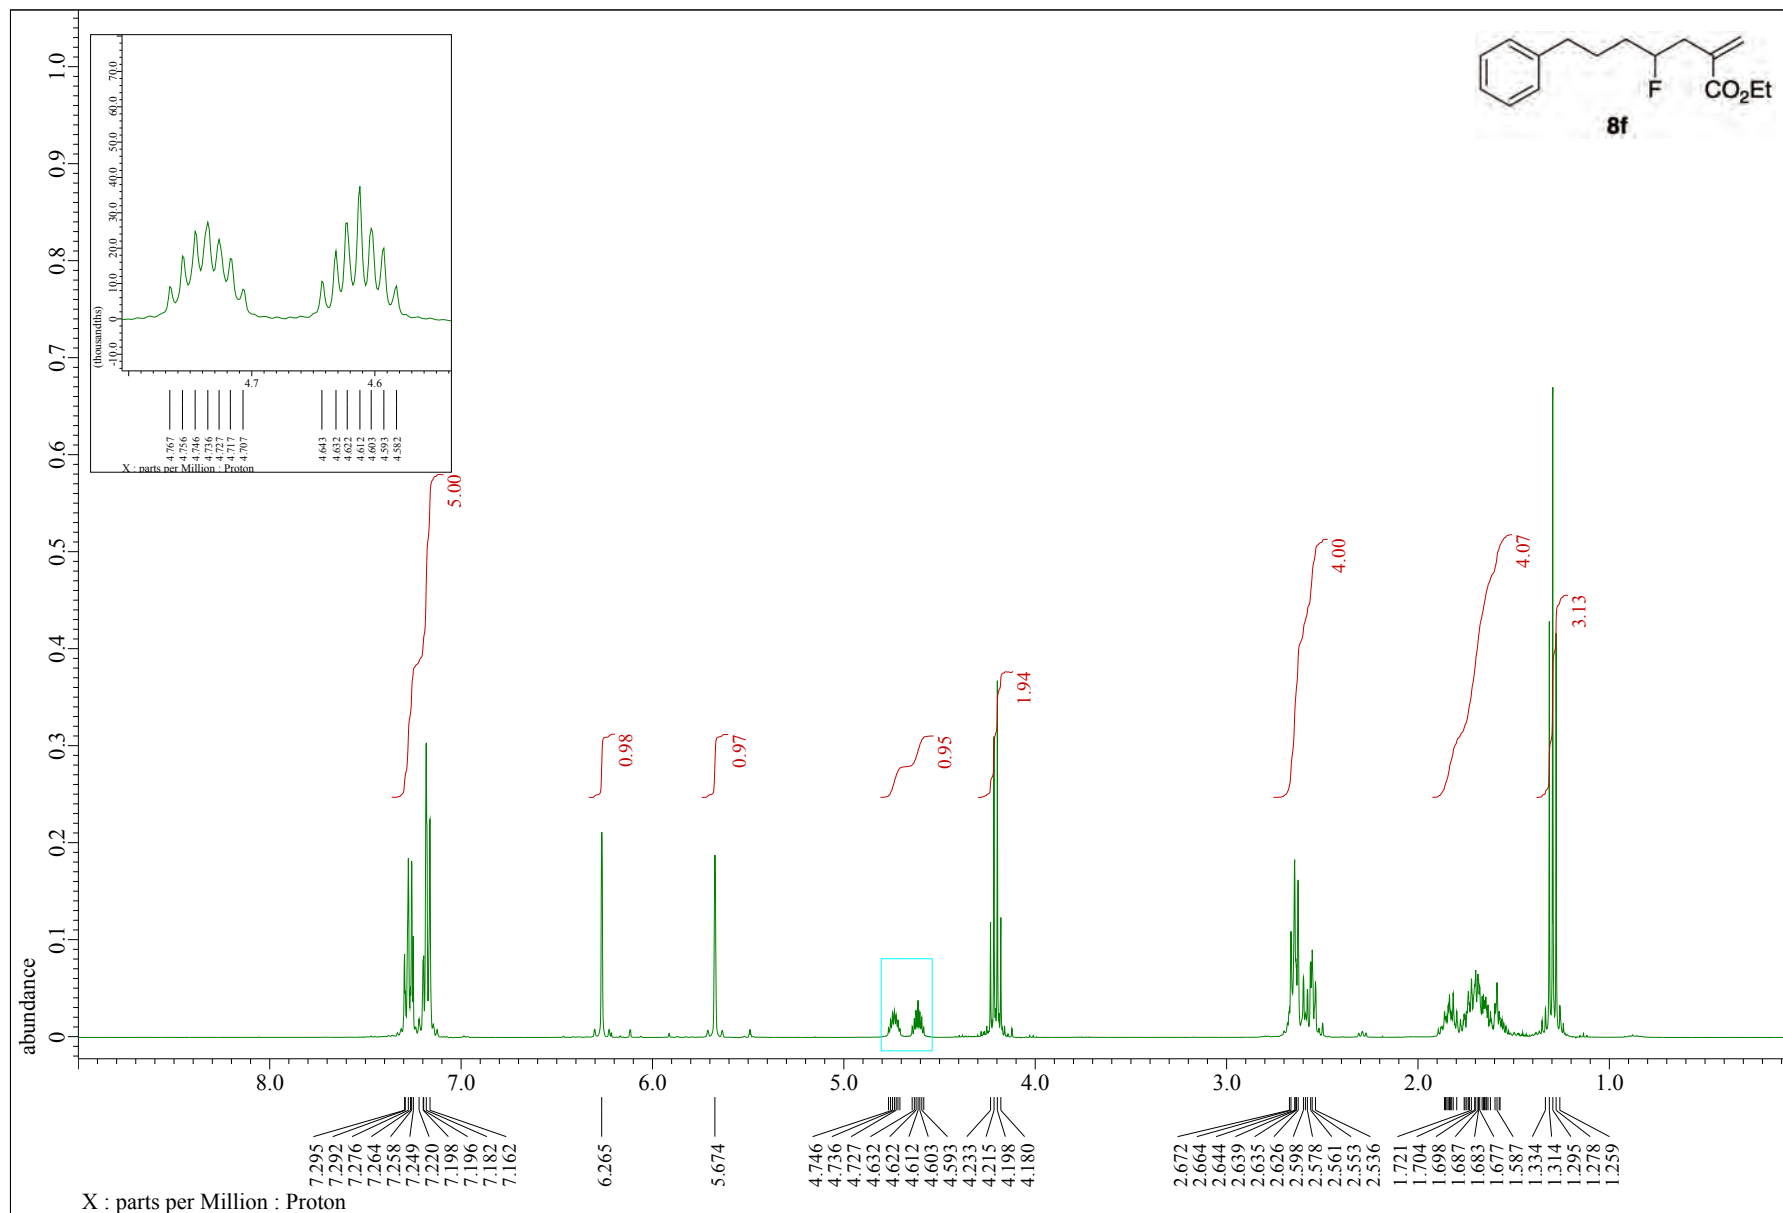

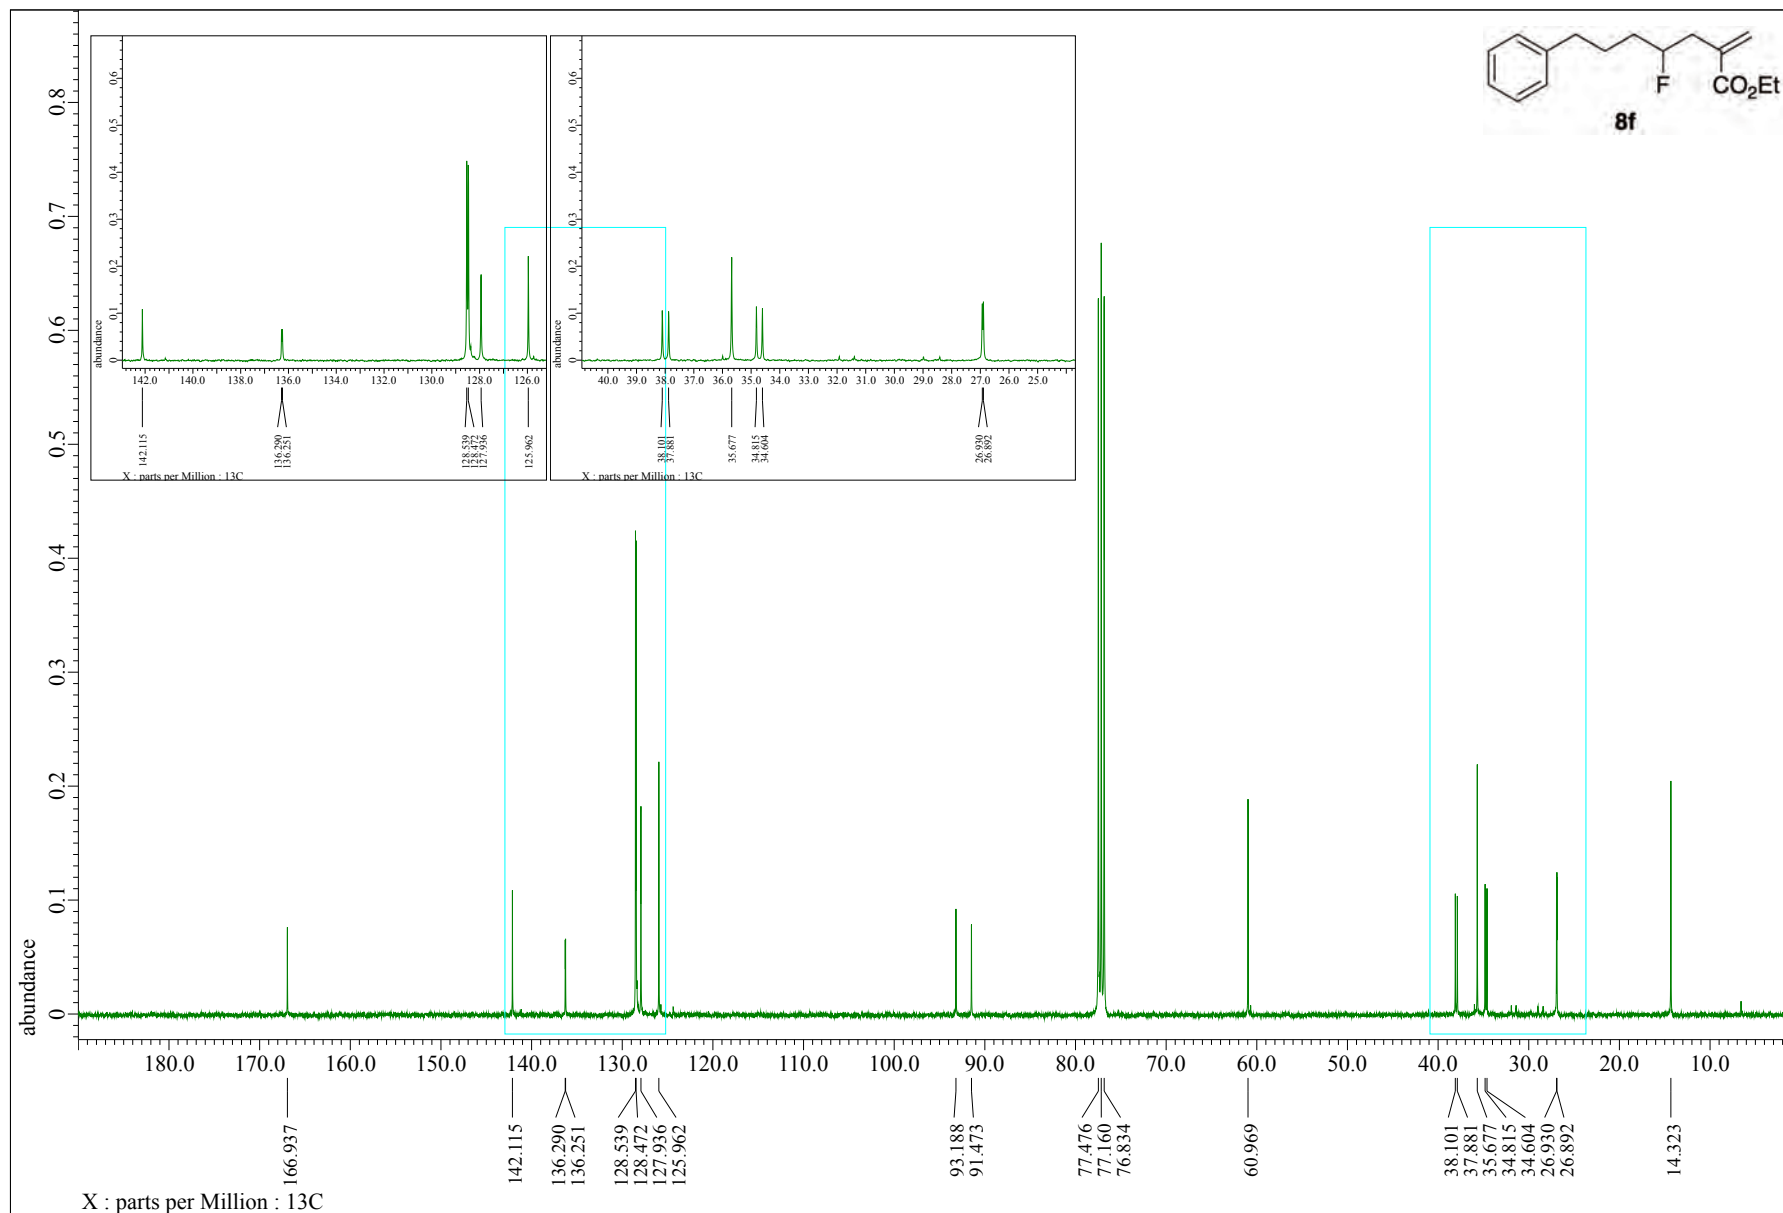

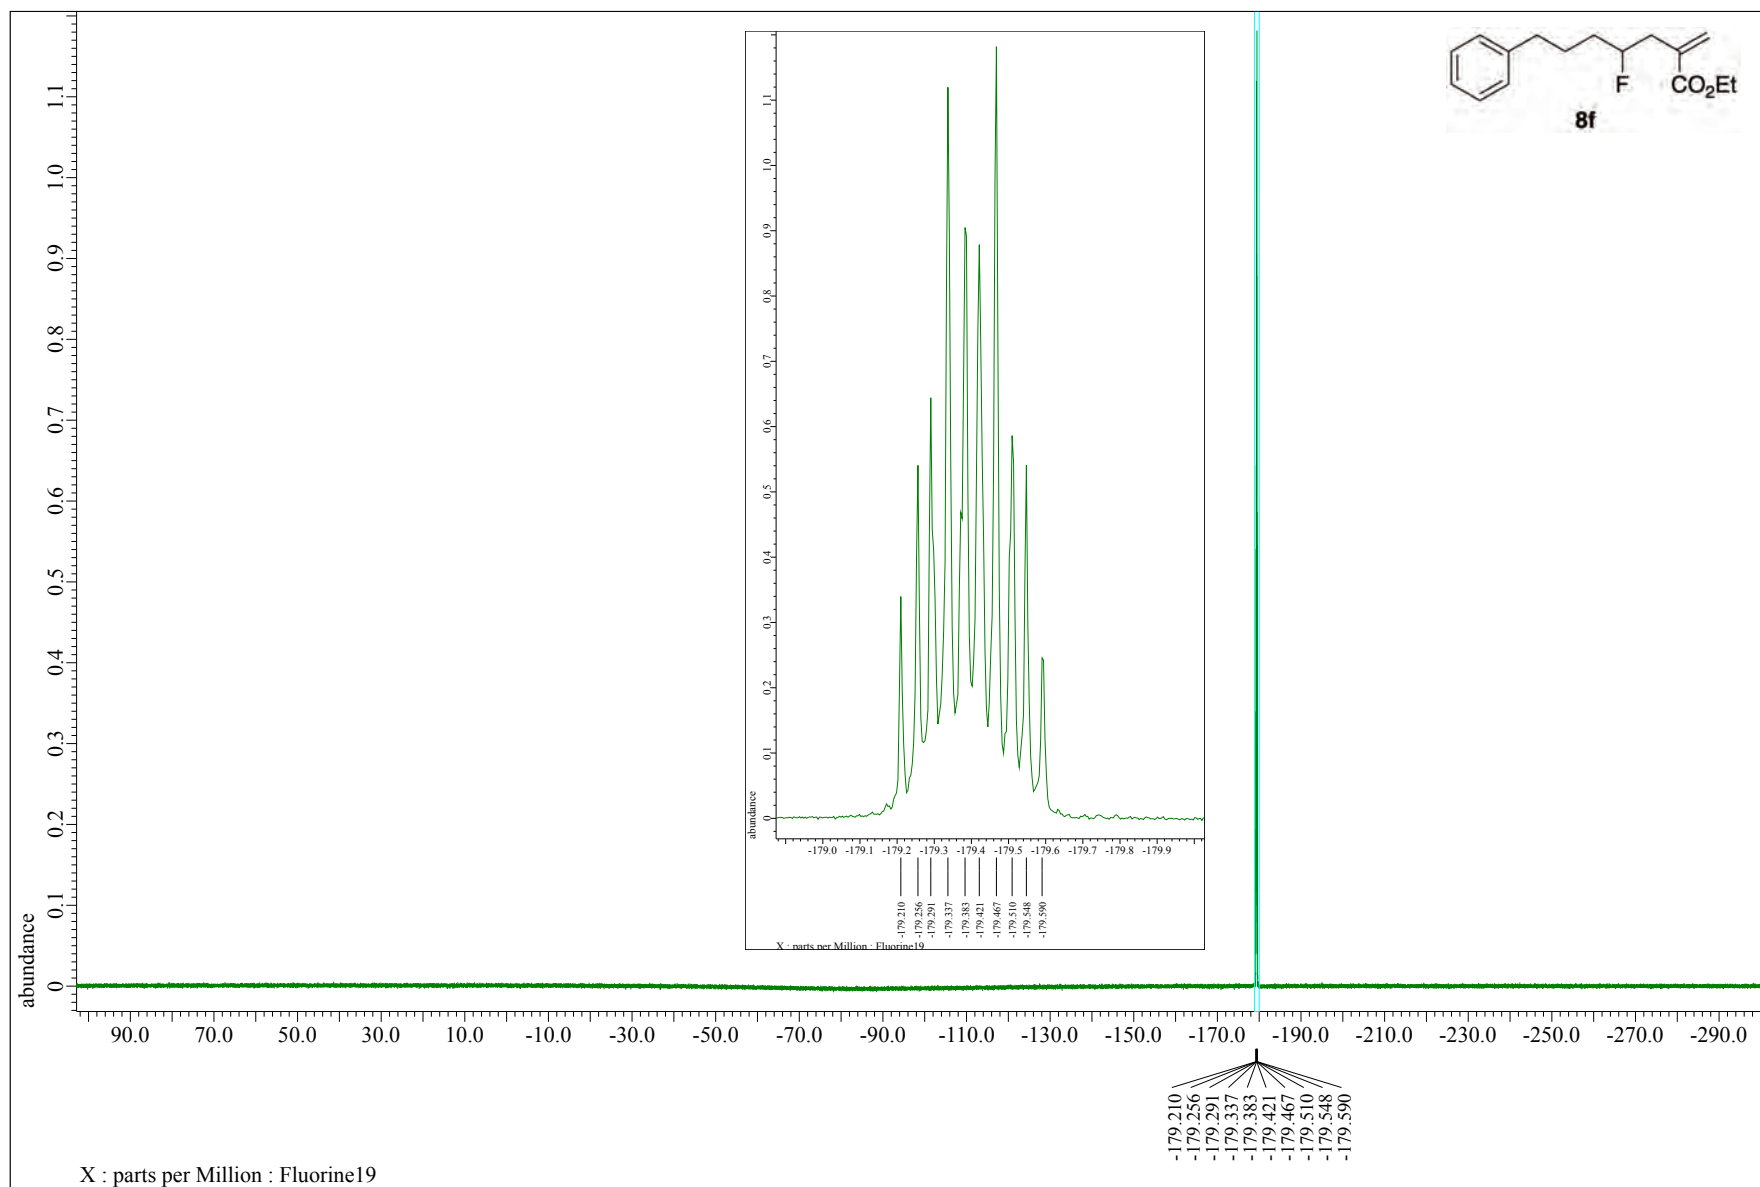



Sample No. : C:\Xcalibur\...\1227\BG\_231835\_8f\_

Instrument : Exactive Plus

Mobile phase solvent : MeOH

Operator name : hayashi harumi

Sample solvent : CHCl<sub>3</sub>

Date : 12/28/23 11:47:08

Instrumental method : C:\Xcalibur\methods\ESI\_100ul\S60\_100ul\_mz100\_1500pn.meth

Instrumental Analysis Division, Global Facility Center, Creative Research Institution, Hokkaido University

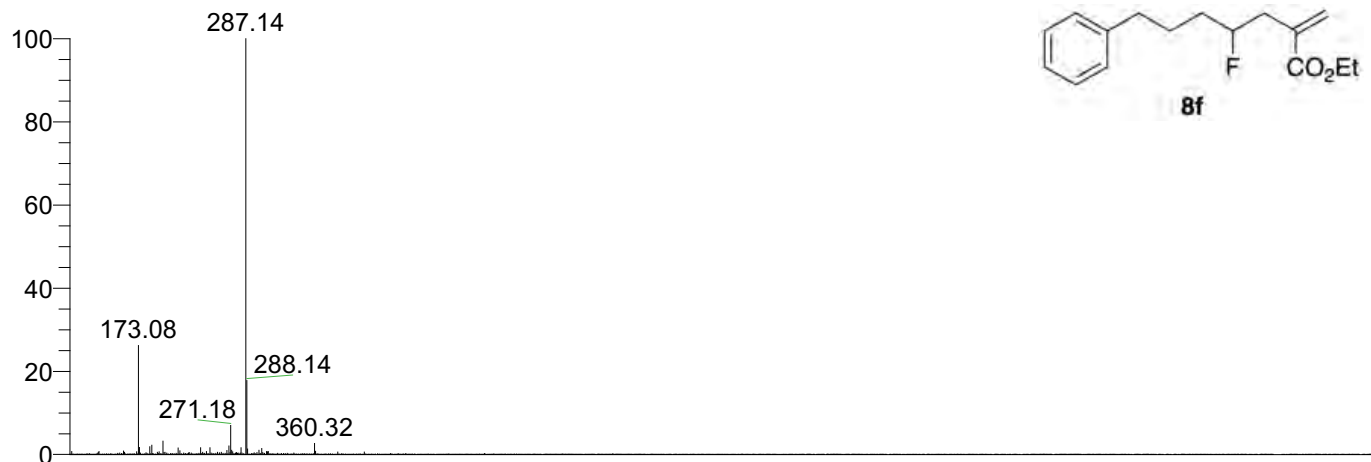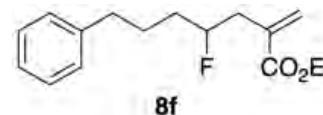

NL: 5.67E7  
BG\_231835\_8f\_pn#18  
-31 RT: 0.31-0.50  
AV: 7 T: FTMS + c  
ESI Full ms  
[100.00-1500.00]

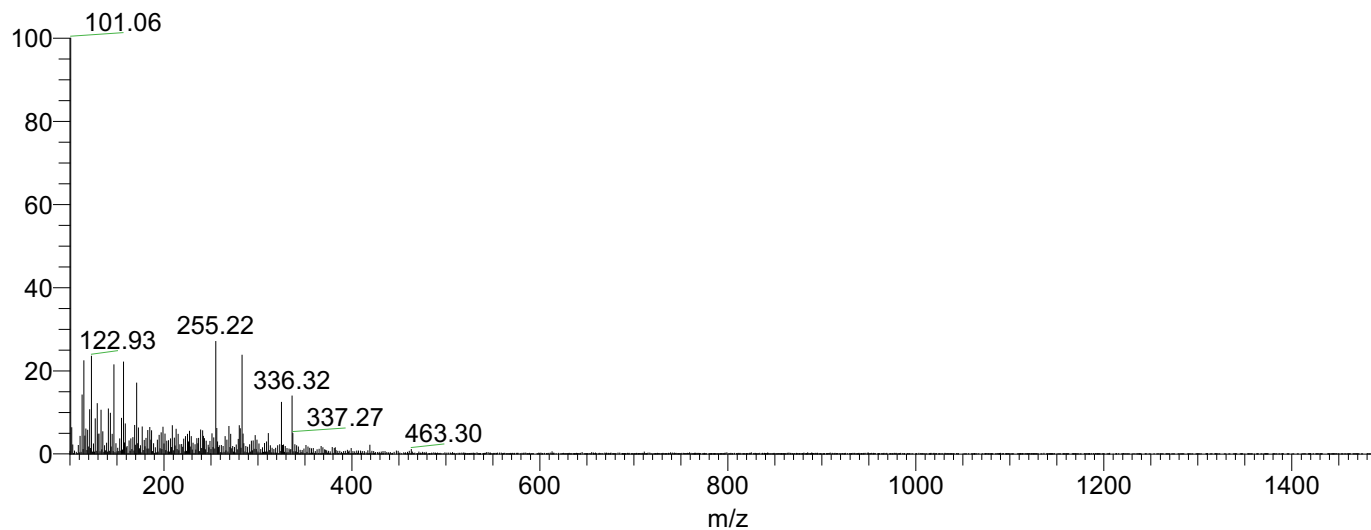

NL: 2.73E6  
BG\_231835\_8f\_pn#18  
-31 RT: 0.30-0.48  
AV: 7 T: FTMS - c ESI  
Full ms  
[100.00-1500.00]

Sample No. : C:\Xcalibur\...20231211\227\231835\_8f\_pn

Instrument : Exactive Plus

Mobile phase solvent : MeOH

Operator name : hayashi harumi

Sample solvent : CHCl<sub>3</sub>

Date : 12/27/23 16:42:26

Instrumental method : C:\Xcalibur\methods\ESI\_100ul\S60\_100ul\_mz100\_1500pn.meth

Instrumental Analysis Division, Global Facility Center, Creative Research Institution, Hokkaido University

231835\_8f\_pn #21-25 RT: 0.35-0.41 AV: 3 NL: 2.19E7

T: FTMS + p ESI Full ms [100.0000-1500.0000]

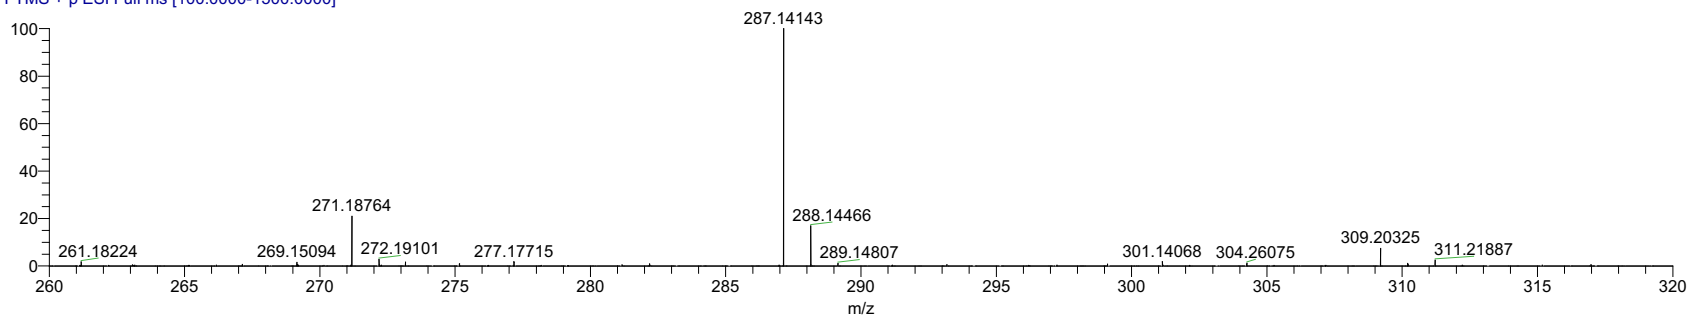

231835\_8f\_pn #25-28 RT: 0.41-0.44 AV: 2 NL: 1.80E7

T: FTMS + p ESI Full ms [100.0000-1500.0000]

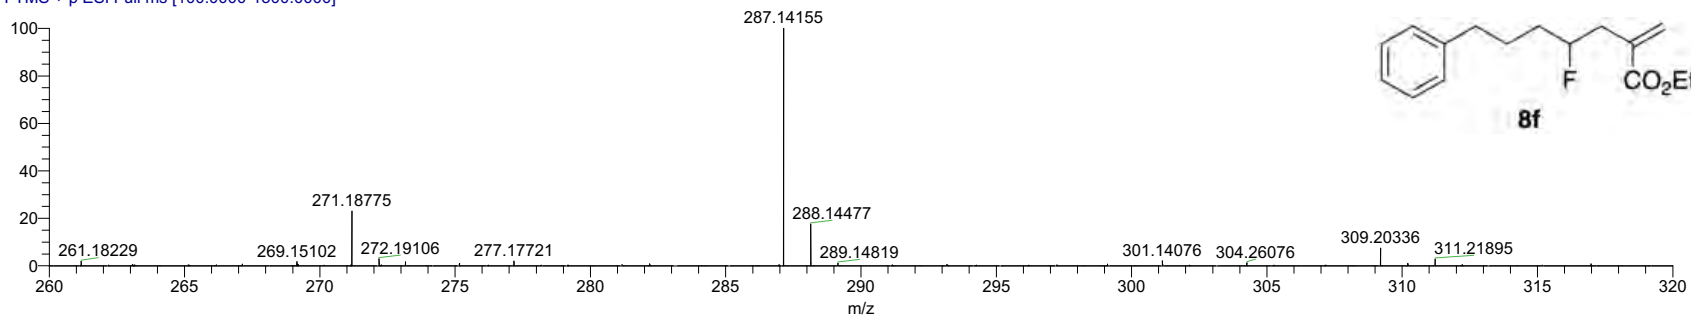

231835\_8f\_pn #28-31 RT: 0.47-0.50 AV: 2 NL: 6.67E6

T: FTMS + p ESI Full ms [100.0000-1500.0000]

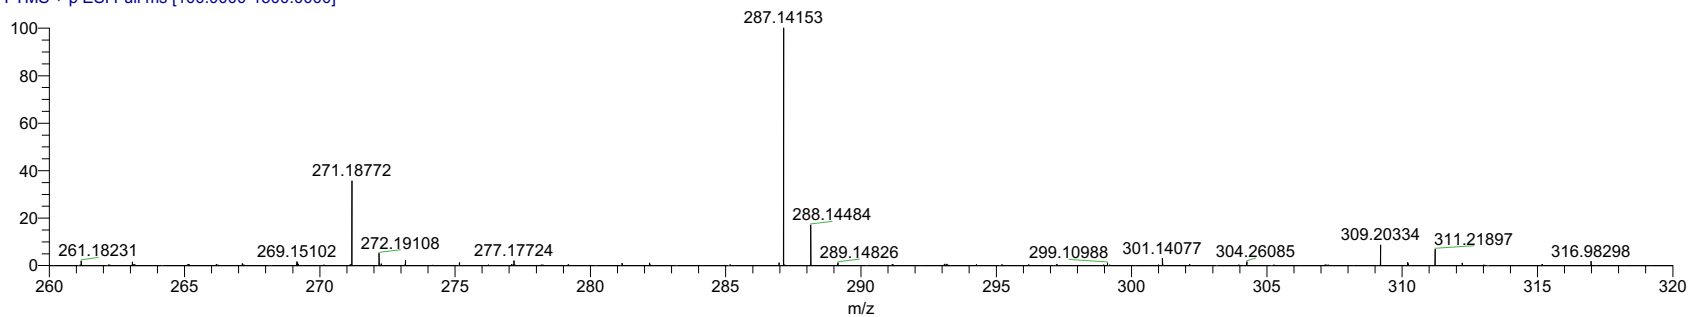

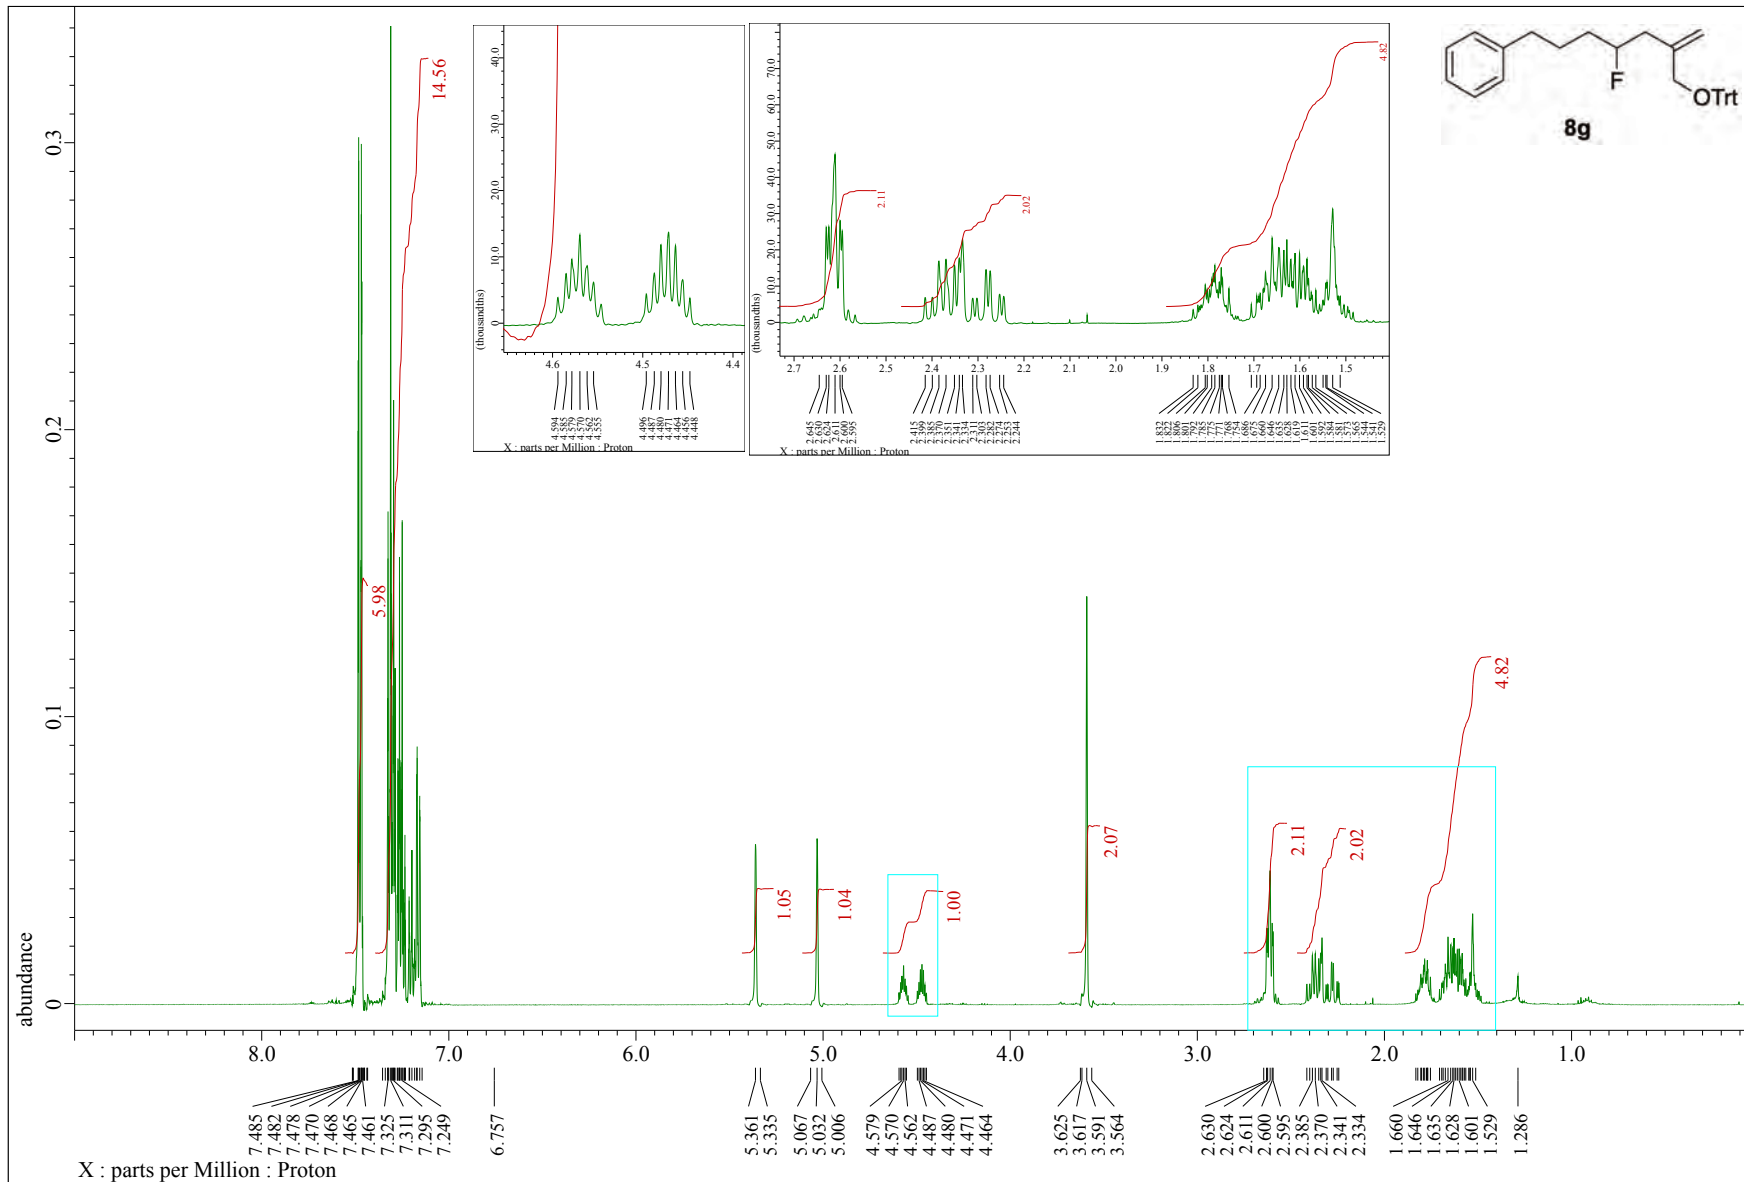

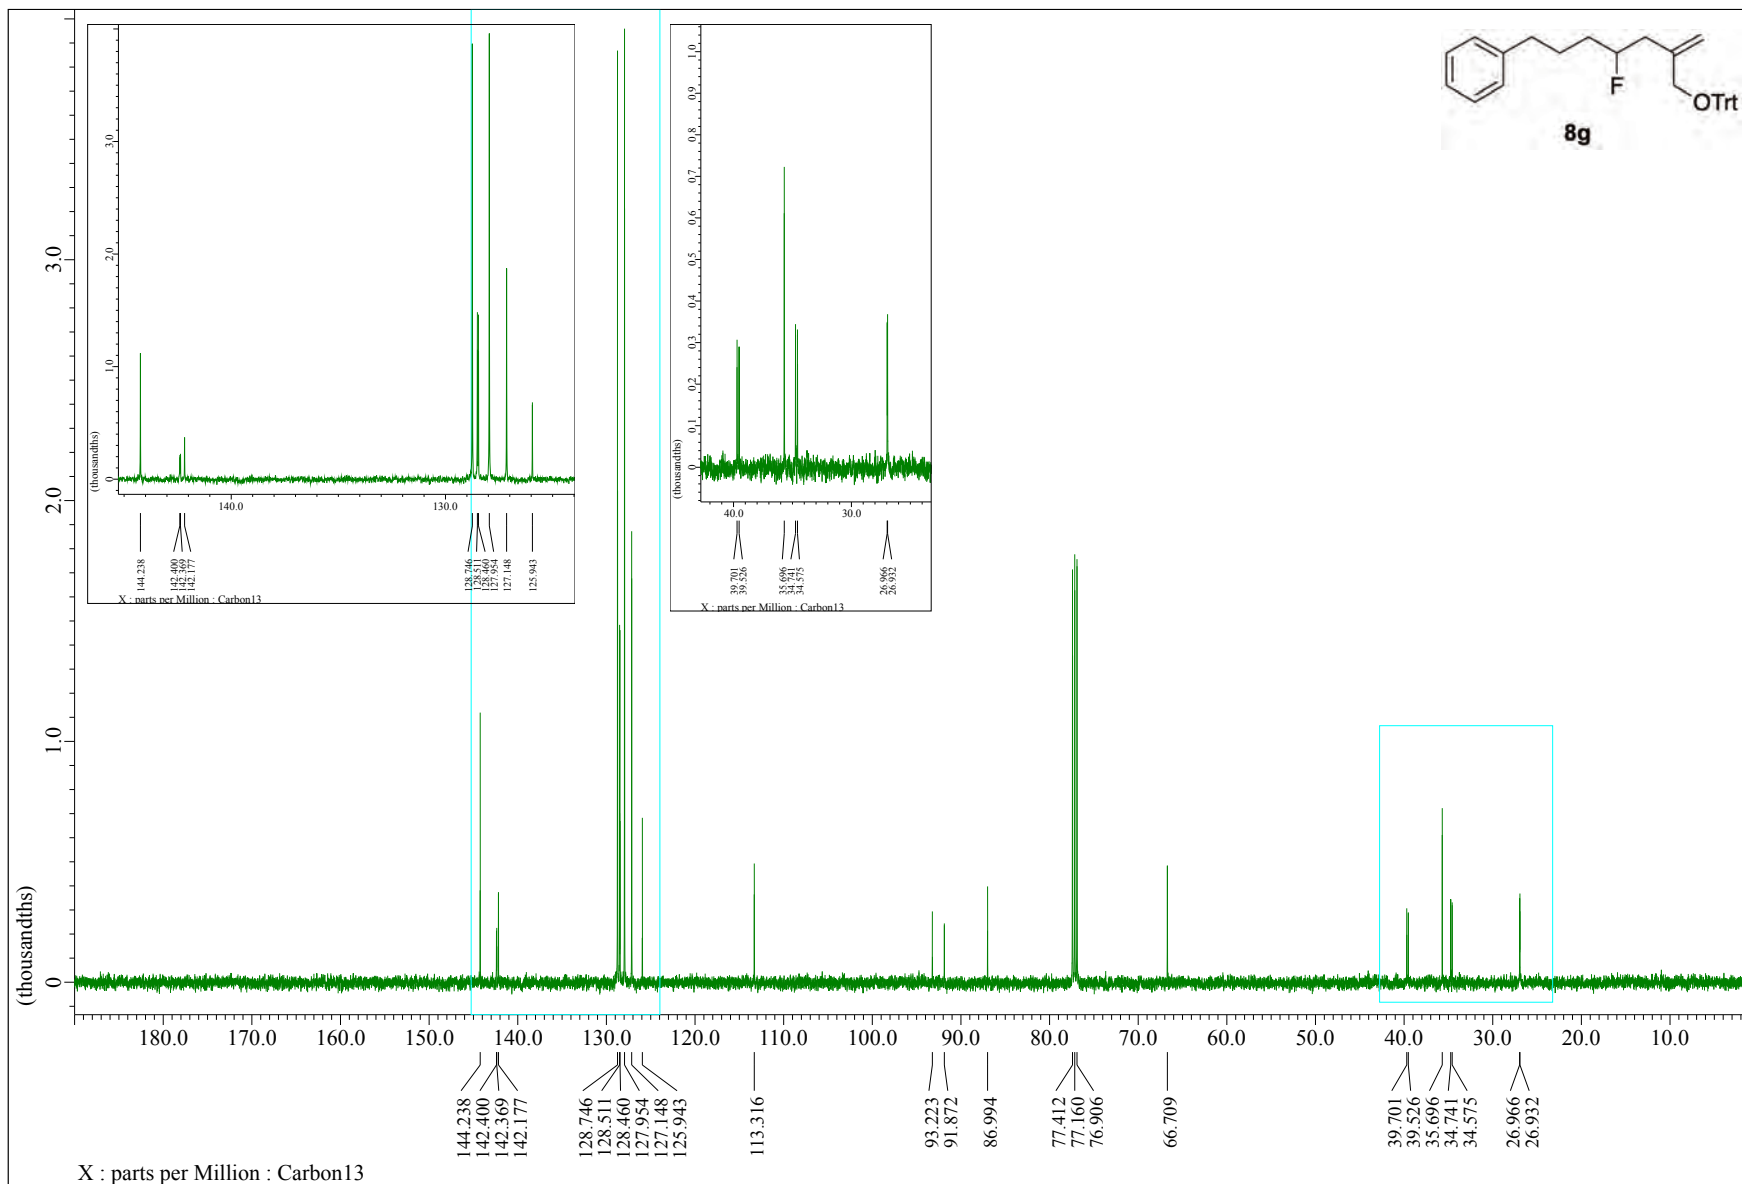

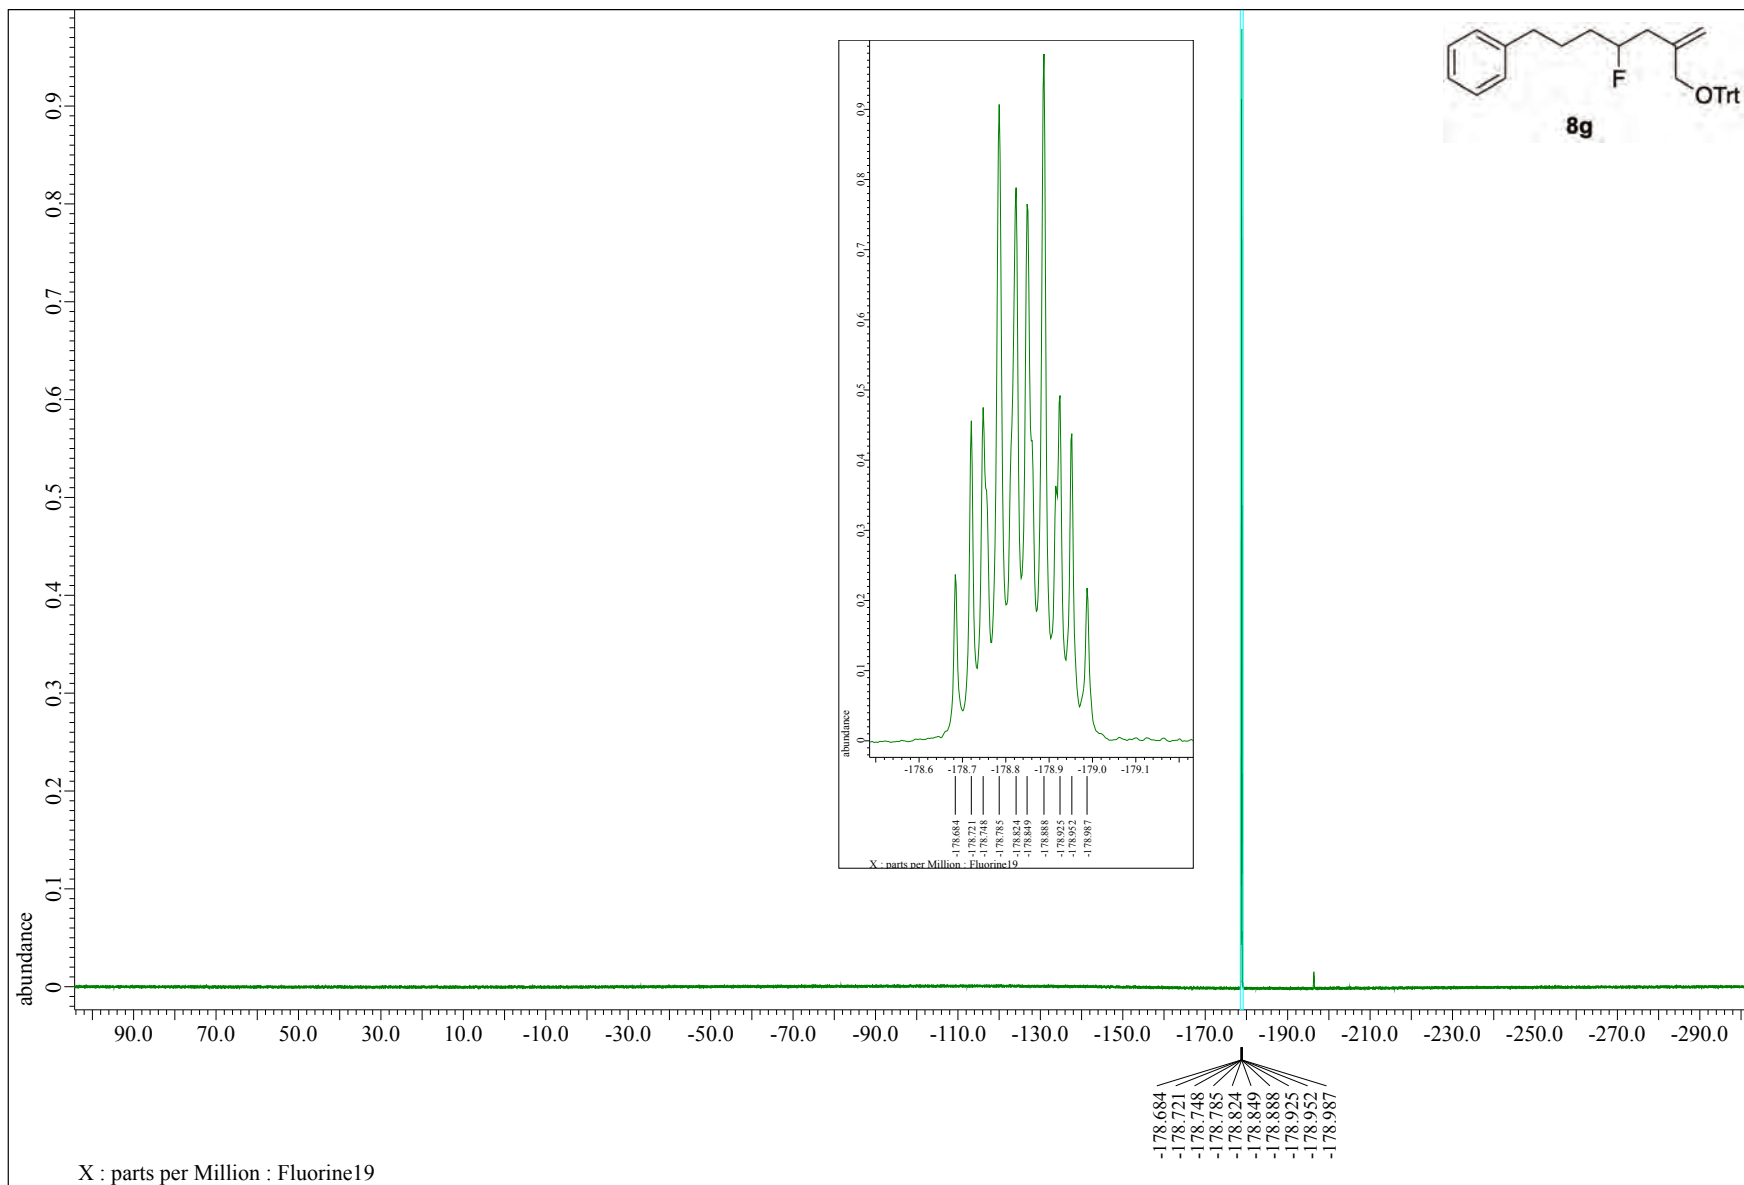

Sample No. : C:\Xcalibur\...\1227\BG\_231836\_8c\_

Instrument : Exactive Plus

Mobile phase solvent : MeOH

Operator name : hayashi harumi

Sample solvent : CHCl3

Date : 12/28/23 11:46:45

Instrumental method : C:\Xcalibur\methods\ESI\_100ul\S60\_100ul\_mz150\_2000pn.meth

Instrumental Analysis Division, Global Facility Center, Creative Research Institution, Hokkaido University

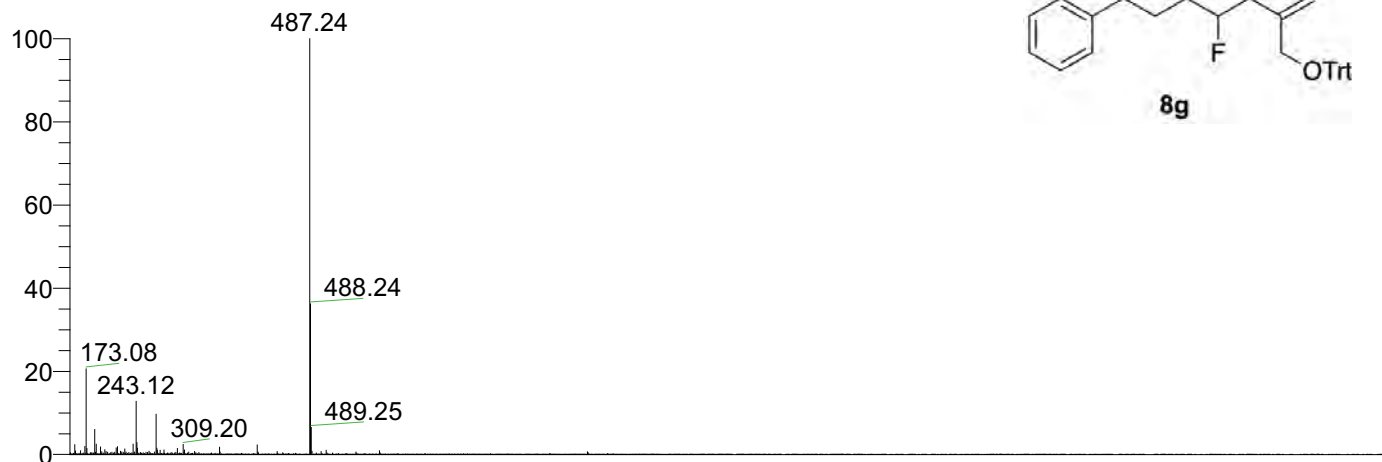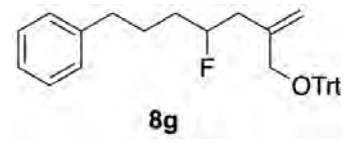

NL: 4.27E7  
BG\_231836\_8g\_pn#1  
8-30 RT: 0.31-0.47  
AV: 6 T: FTMS + c  
ESI Full ms  
[150.00-2000.00]

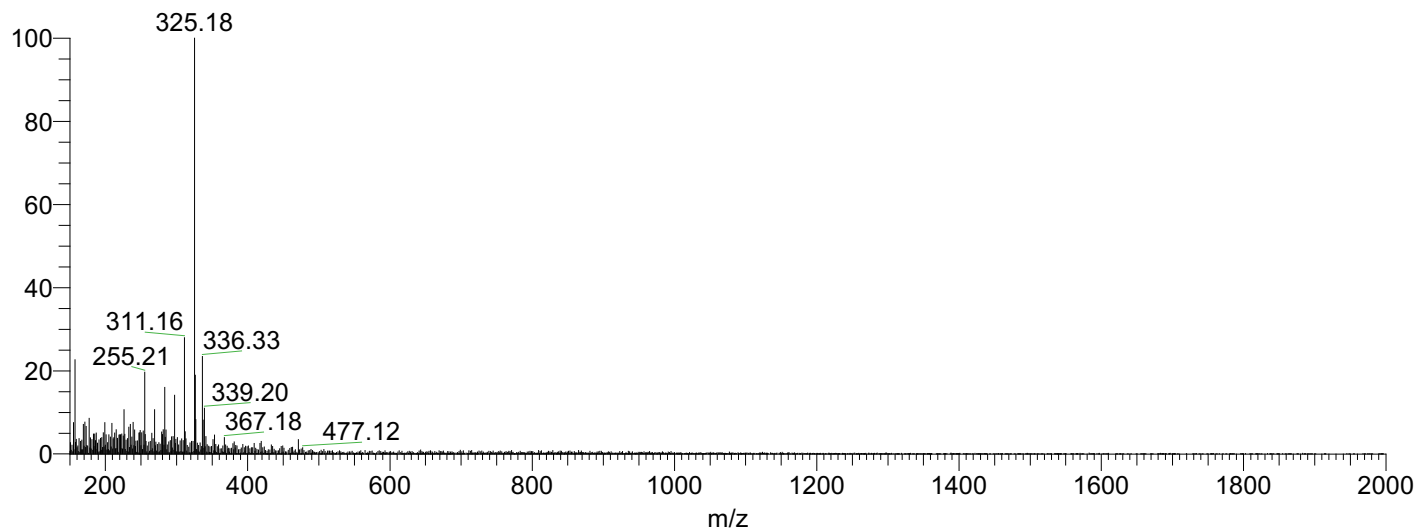

NL: 1.25E6  
BG\_231836\_8g\_pn#1  
8-31 RT: 0.30-0.49  
AV: 7 T: FTMS - c ESI  
Full ms  
[150.00-2000.00]

Sample No. : C:\Xcalibur\...20231211\227\231836\_8g\_pn

Instrument : Exactive Plus

Mobile phase solvent : MeOH

Operator name : hayashi harumi

Sample solvent : CHCl<sub>3</sub>

Date : 12/27/23 16:47:26

Instrumental method : C:\Xcalibur\methods\ESI\_100ul\S60\_100ul\_mz150\_2000pn.meth

Instrumental Analysis Division, Global Facility Center, Creative Research Institution, Hokkaido University

231836\_8g\_pn#21-24 RT: 0.35-0.38 AV: 2 NL: 1.11E7

T: FTMS + p ESI Full ms [150.0000-2000.0000]

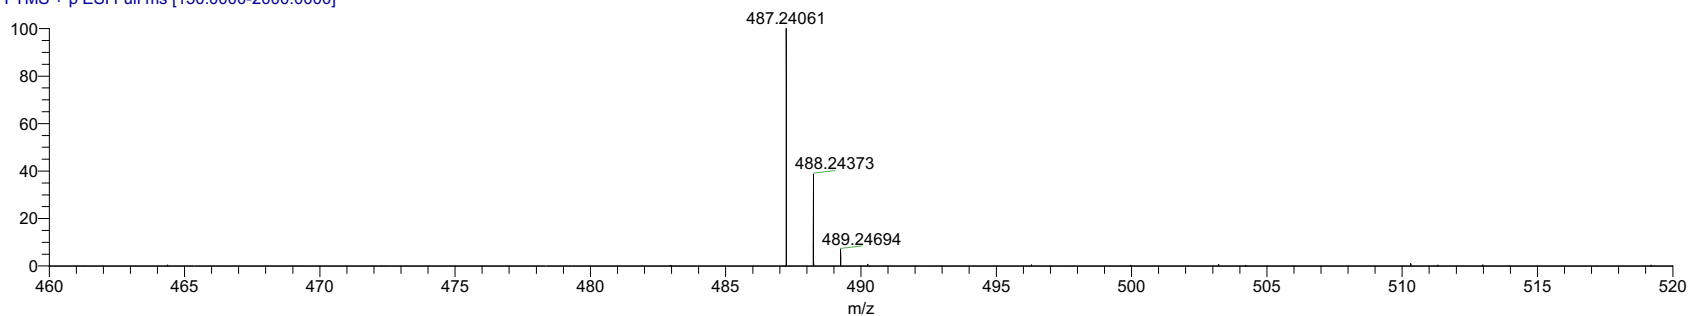

231836\_8g\_pn#25-28 RT: 0.41-0.44 AV: 2 NL: 1.27E7

T: FTMS + p ESI Full ms [150.0000-2000.0000]

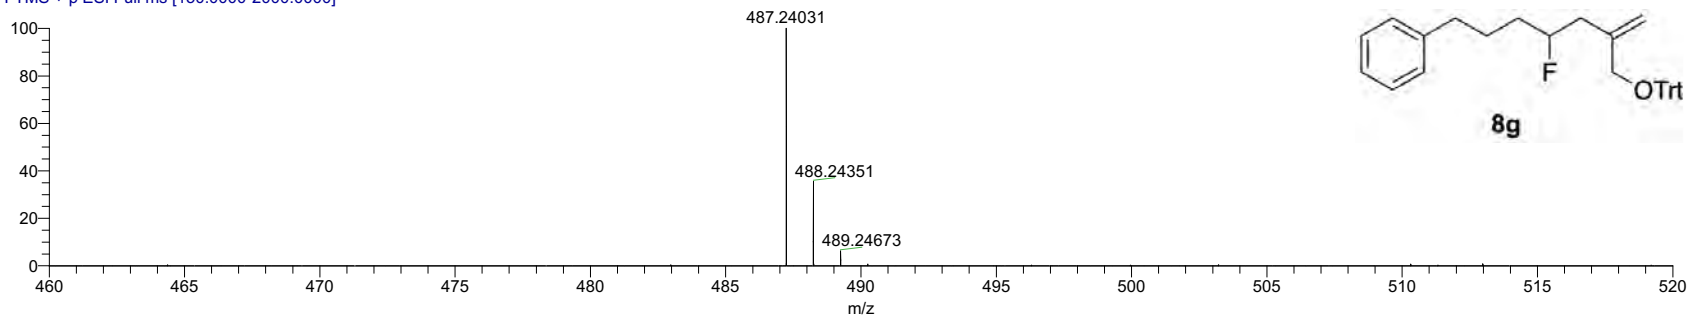

231836\_8g\_pn#29-31 RT: 0.47-0.51 AV: 2 NL: 7.60E6

T: FTMS + p ESI Full ms [150.0000-2000.0000]

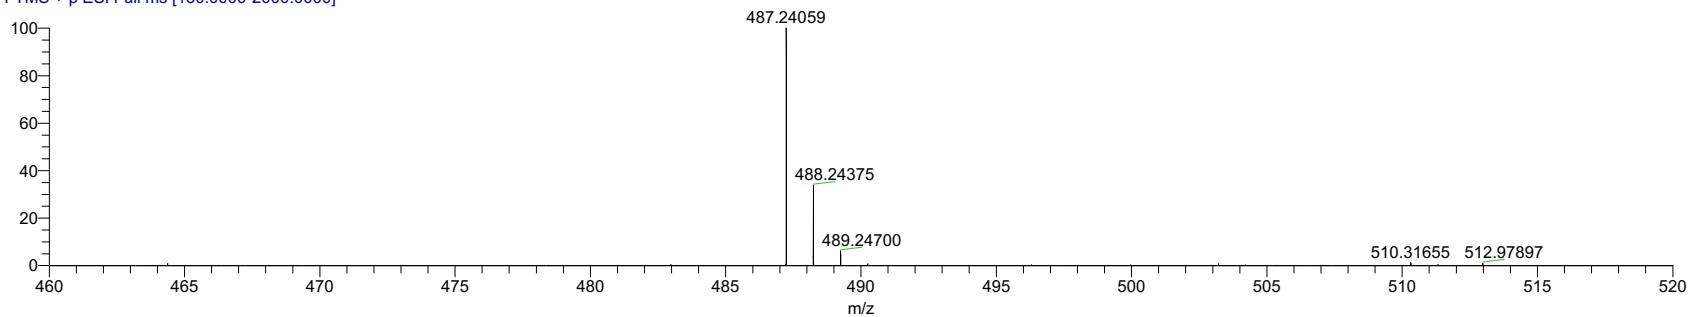

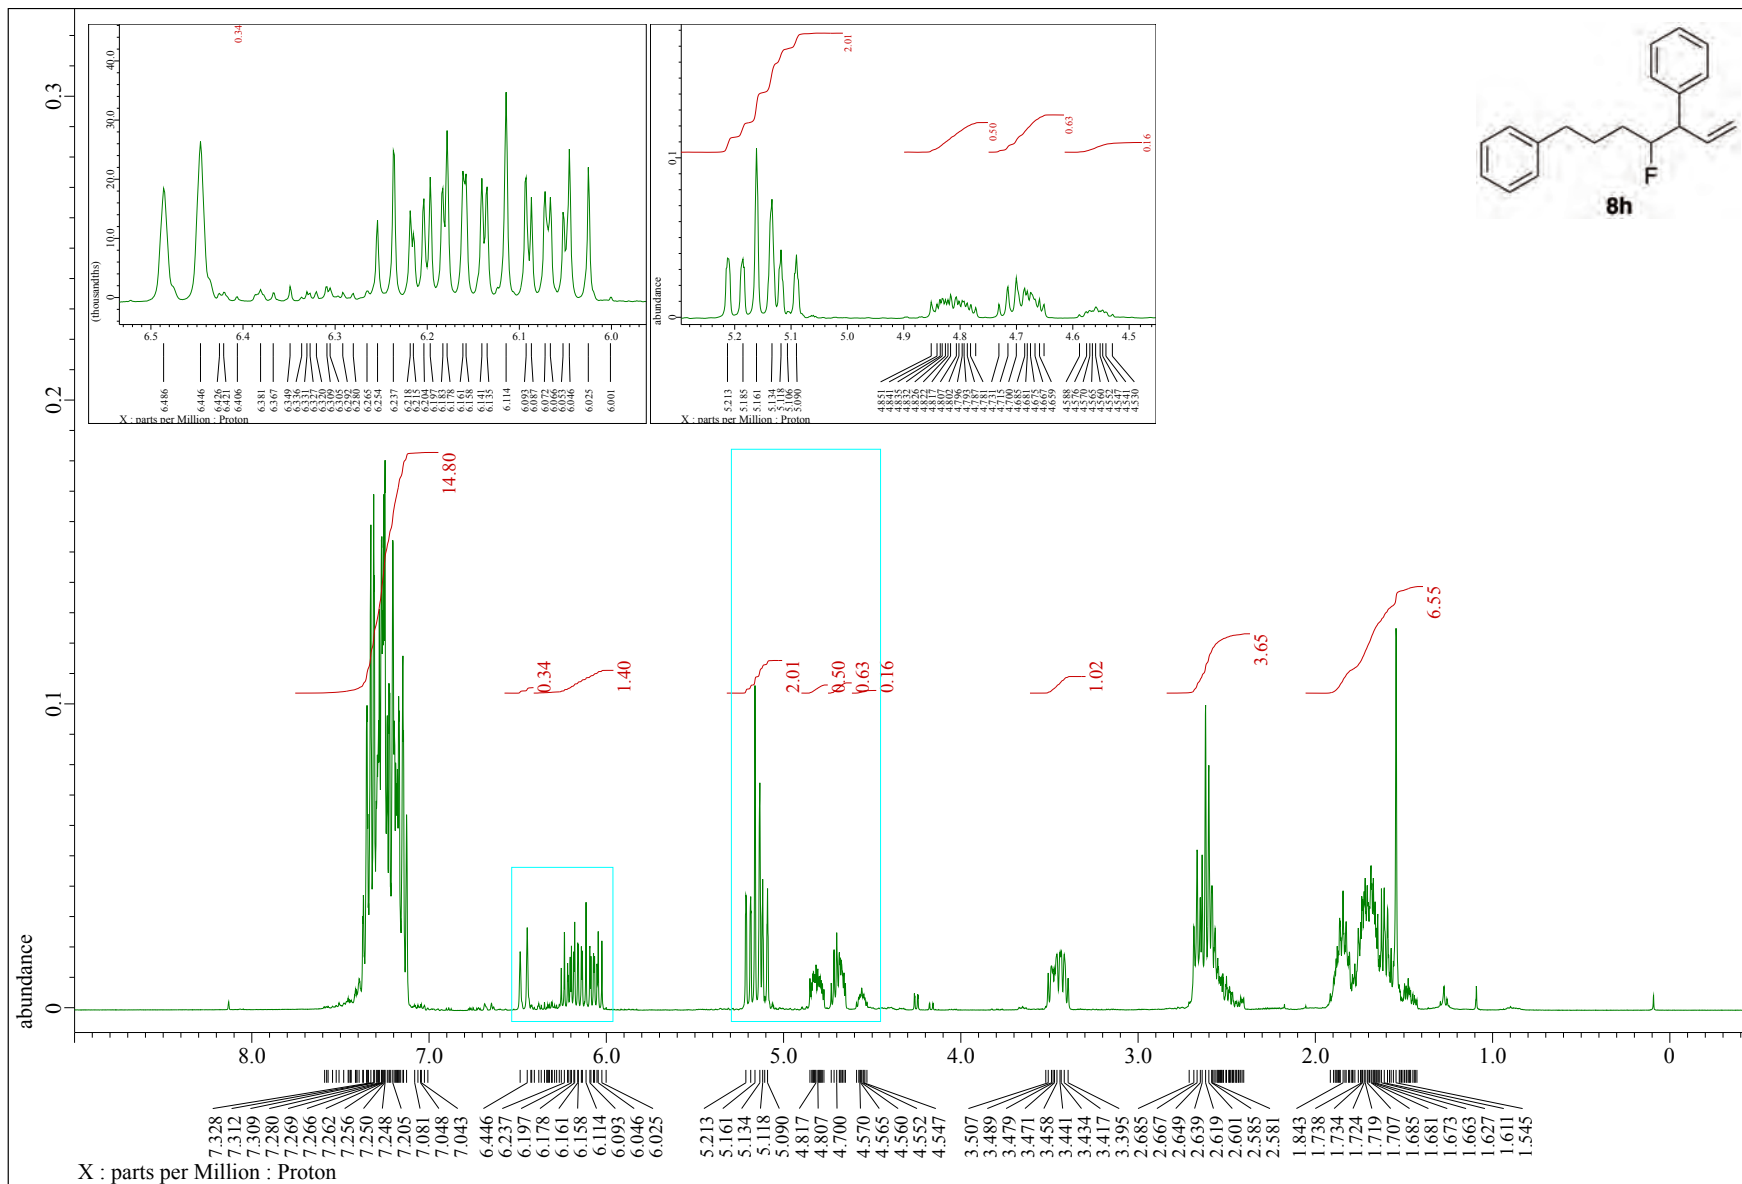



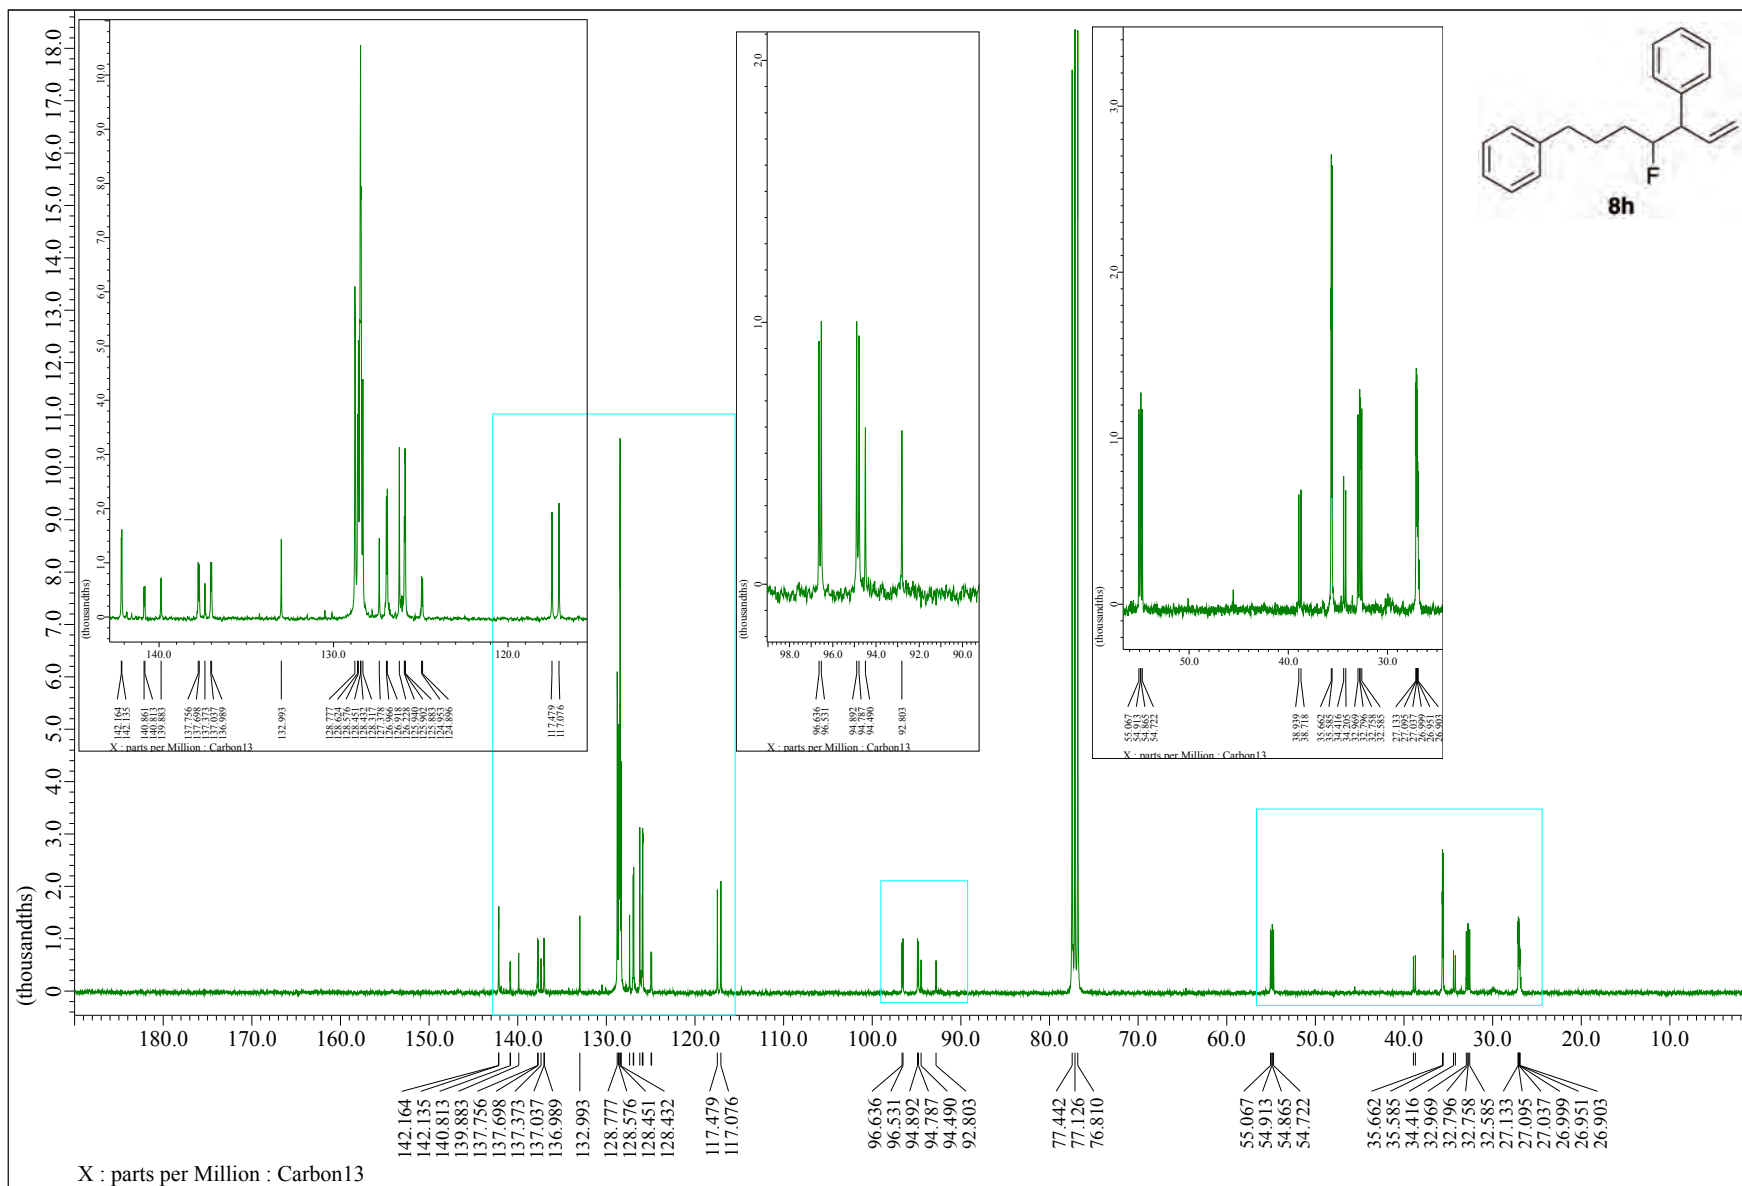

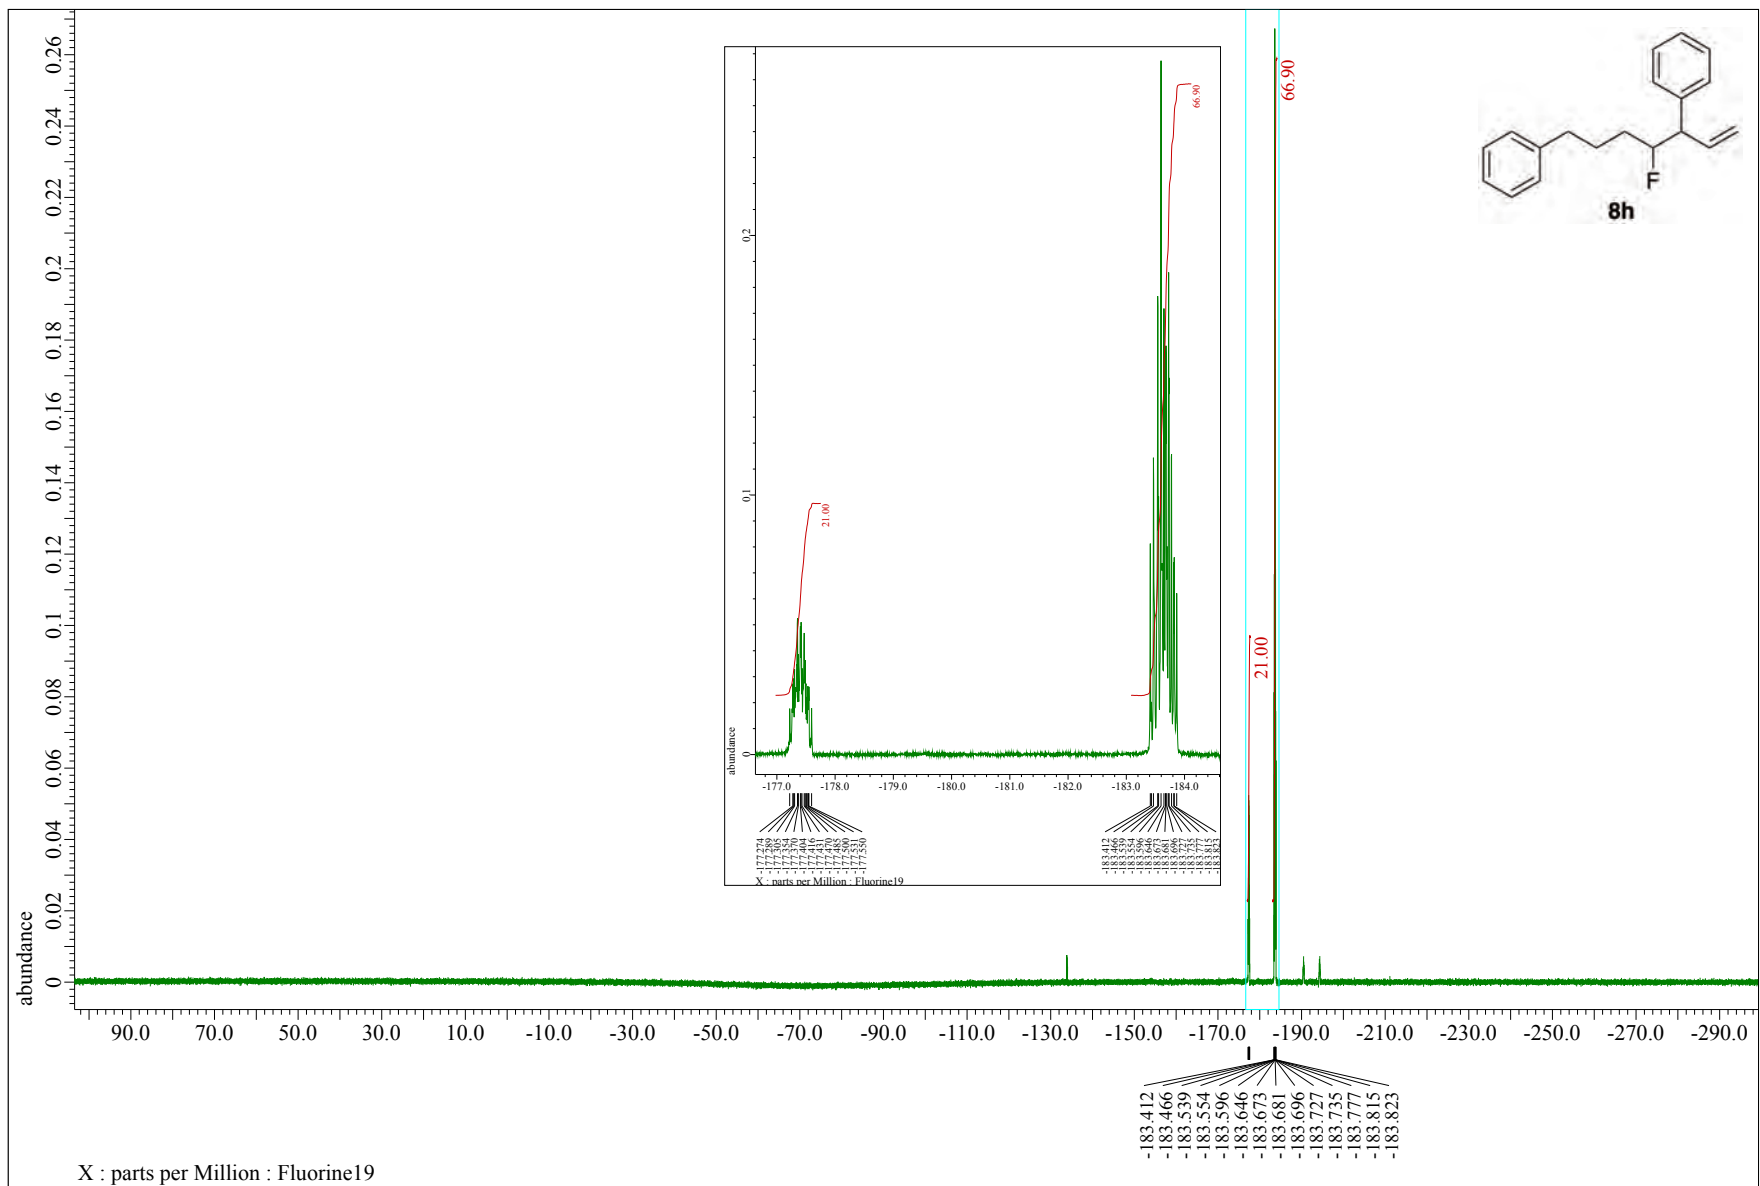

Sample No. : C:\Xcalibur\...\1228\BG\_231837\_8f\_

Instrument : Exactive Plus

Mobile phase solvent : MeOH

Operator name : hayashi harumi

Sample solvent : CHCl3

Date : 12/28/23 14:01:15

Instrumental method : C:\Xcalibur\methods\ESI\_100ul\S60\_100ul\_mz100\_1500pn.meth

Instrumental Analysis Division, Global Facility Center, Creative Research Institution, Hokkaido University

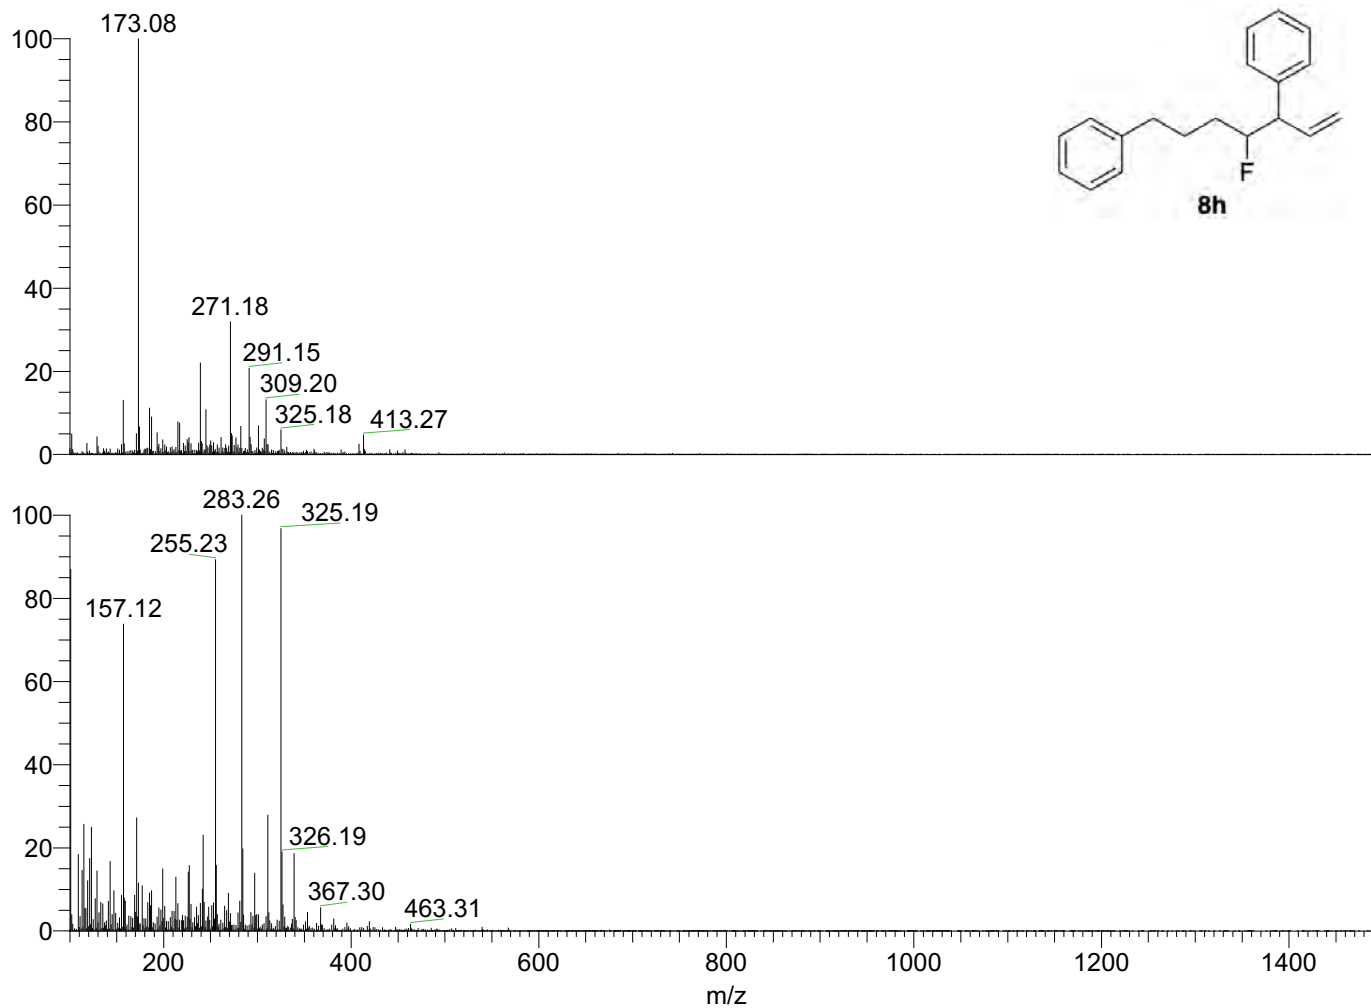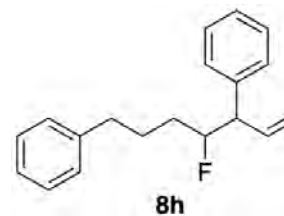

NL: 5.71E7  
BG\_231837\_8h\_pn2#  
19-32 RT: 0.30-0.48  
AV: 7 T: FTMS + c  
ESI Full ms  
[100.00-1500.00]

NL: 7.44E6  
BG\_231837\_8h\_pn2#  
19-32 RT: 0.32-0.50  
AV: 7 T: FTMS - c ESI  
Full ms  
[100.00-1500.00]

Sample No. : C:\Xcalibur\...1228\201307\_8h\_pn2

Instrument : Exactive Plus

Mobile phase solvent : MeOH

Operator name : hayashi harumi

Sample solvent : CHCl3

Date : 12/28/23 13:45:21

Instrumental method : C:\Xcalibur\methods\ESI\_100ul\S60\_100ul\_mz100\_1500pn.meth

Instrumental Analysis Division, Global Facility Center, Creative Research Institution, Hokkaido University

231837\_8h\_pn2 #22-26 RT: 0.36-0.39 AV: 2 NL: 4.37E6

T: FTMS + p ESI Full ms [100.0000-1500.0000]

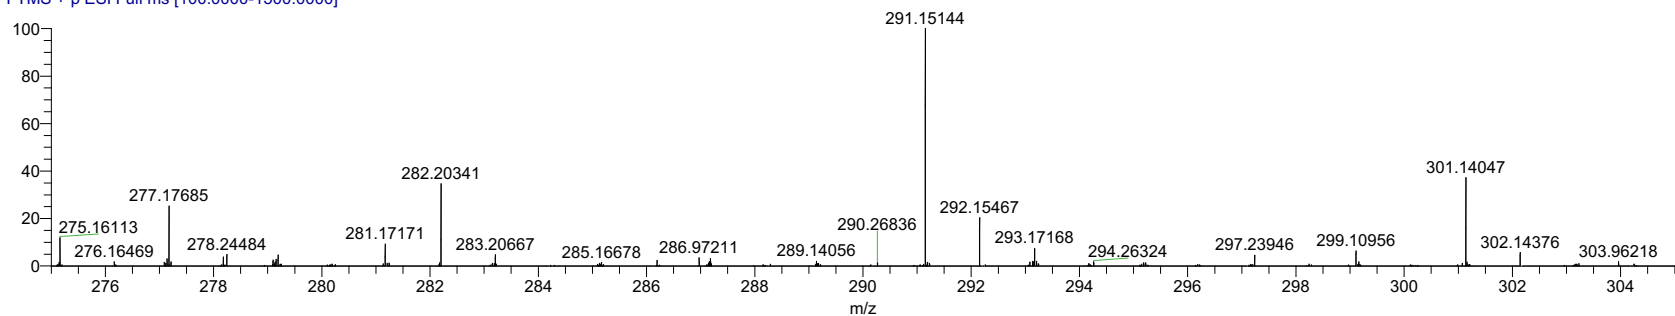

231837\_8h\_pn2 #26-29 RT: 0.42-0.45 AV: 2 NL: 2.54E6

T: FTMS + p ESI Full ms [100.0000-1500.0000]

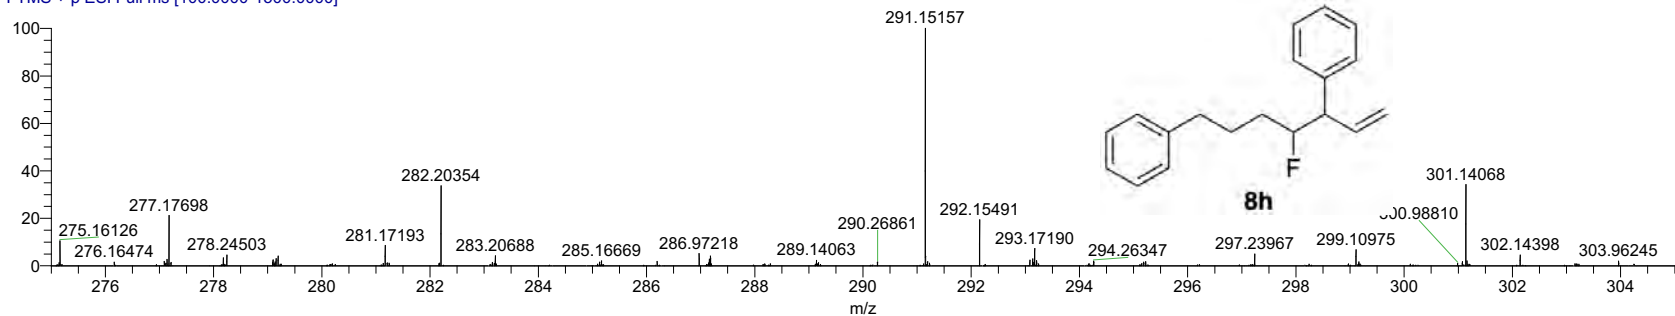

231837\_8h\_pn2 #29-32 RT: 0.45-0.48 AV: 2 NL: 1.85E6

T: FTMS + p ESI Full ms [100.0000-1500.0000]

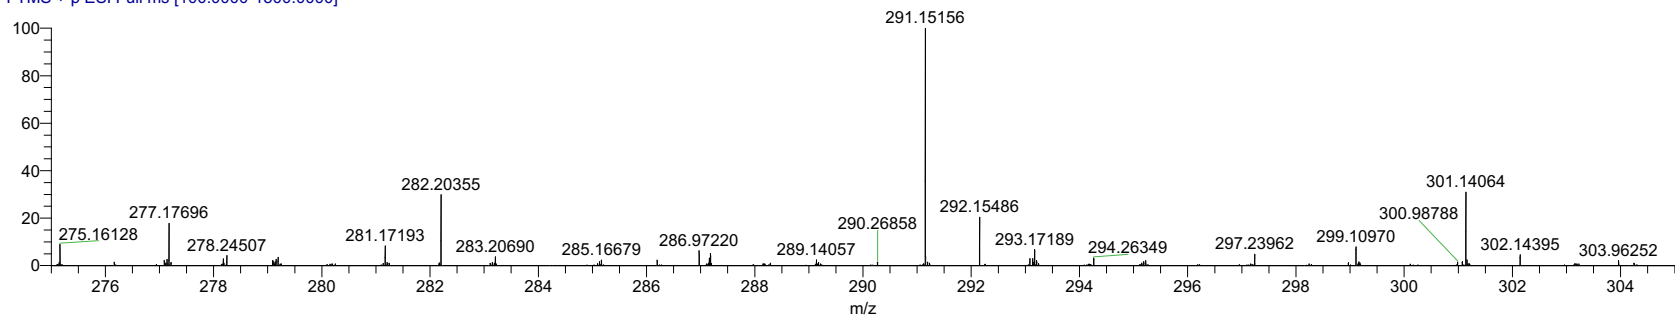

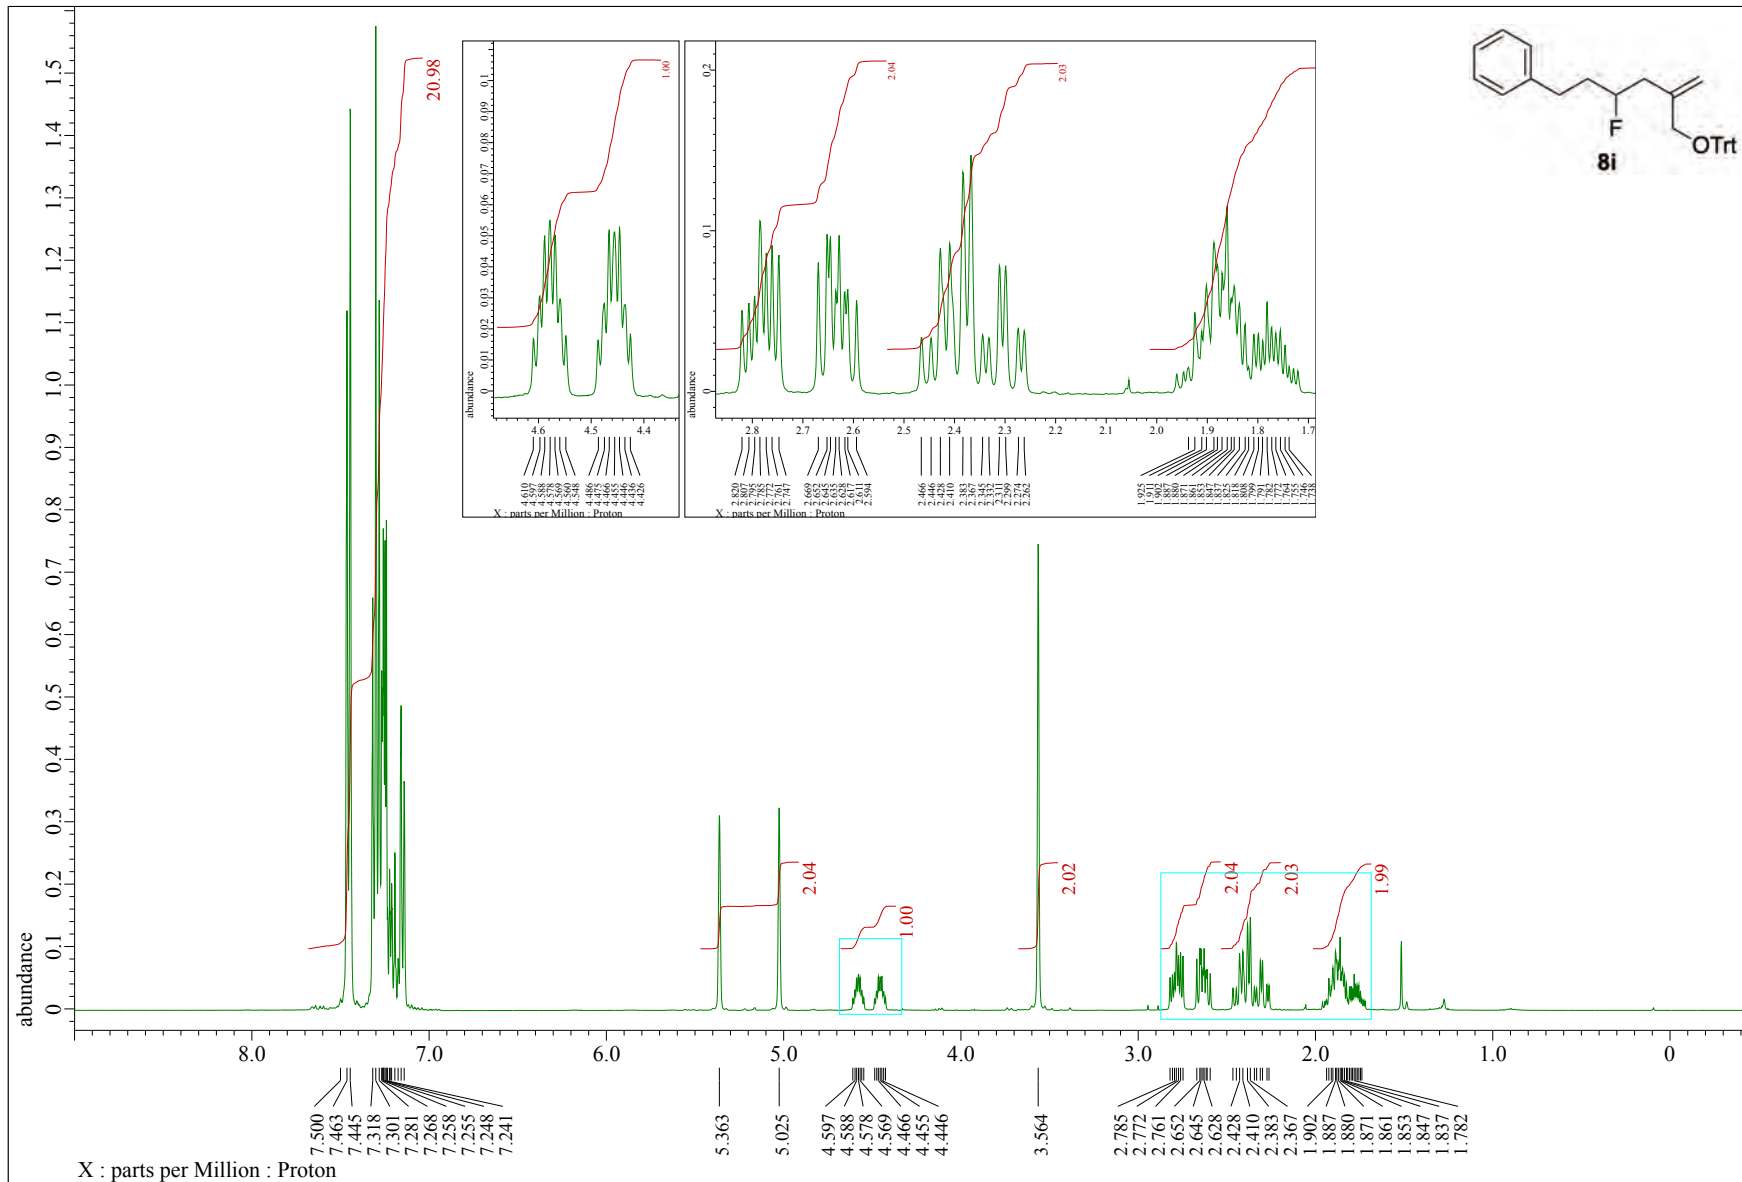

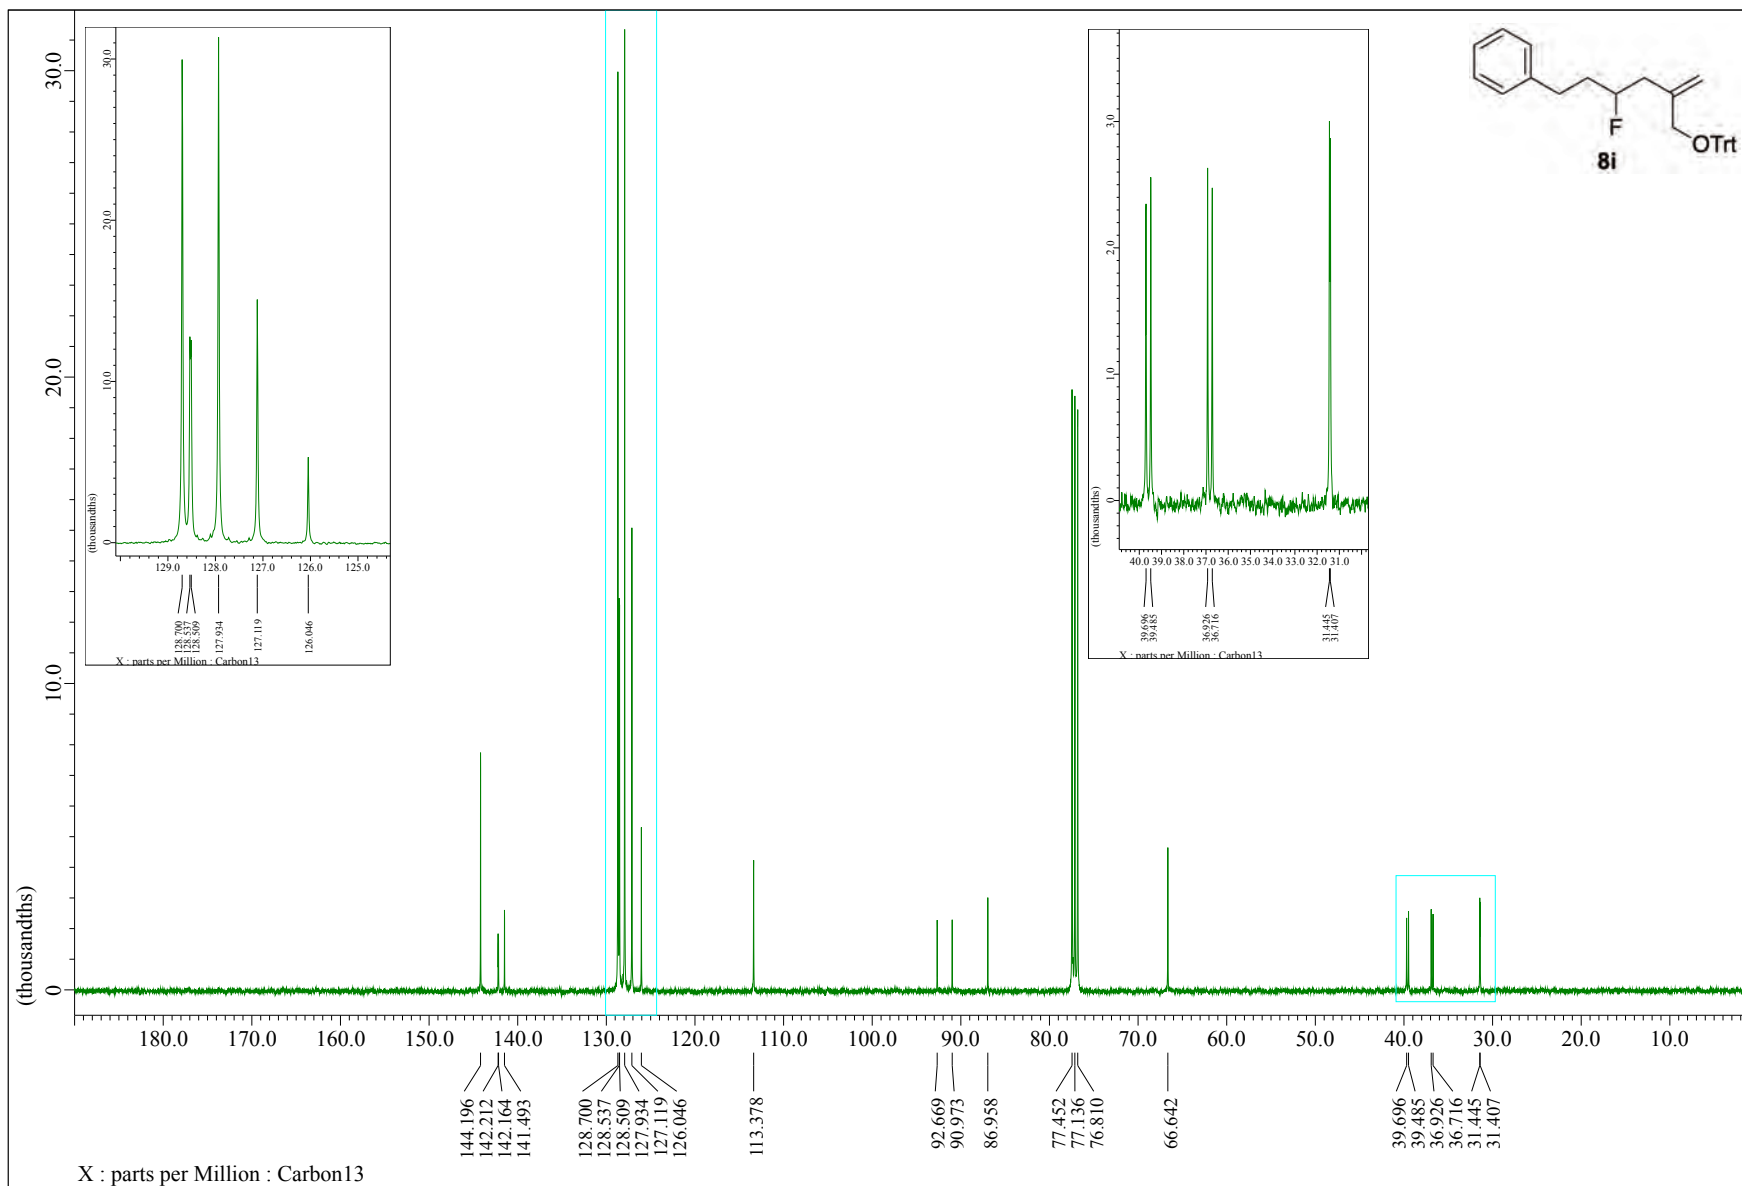

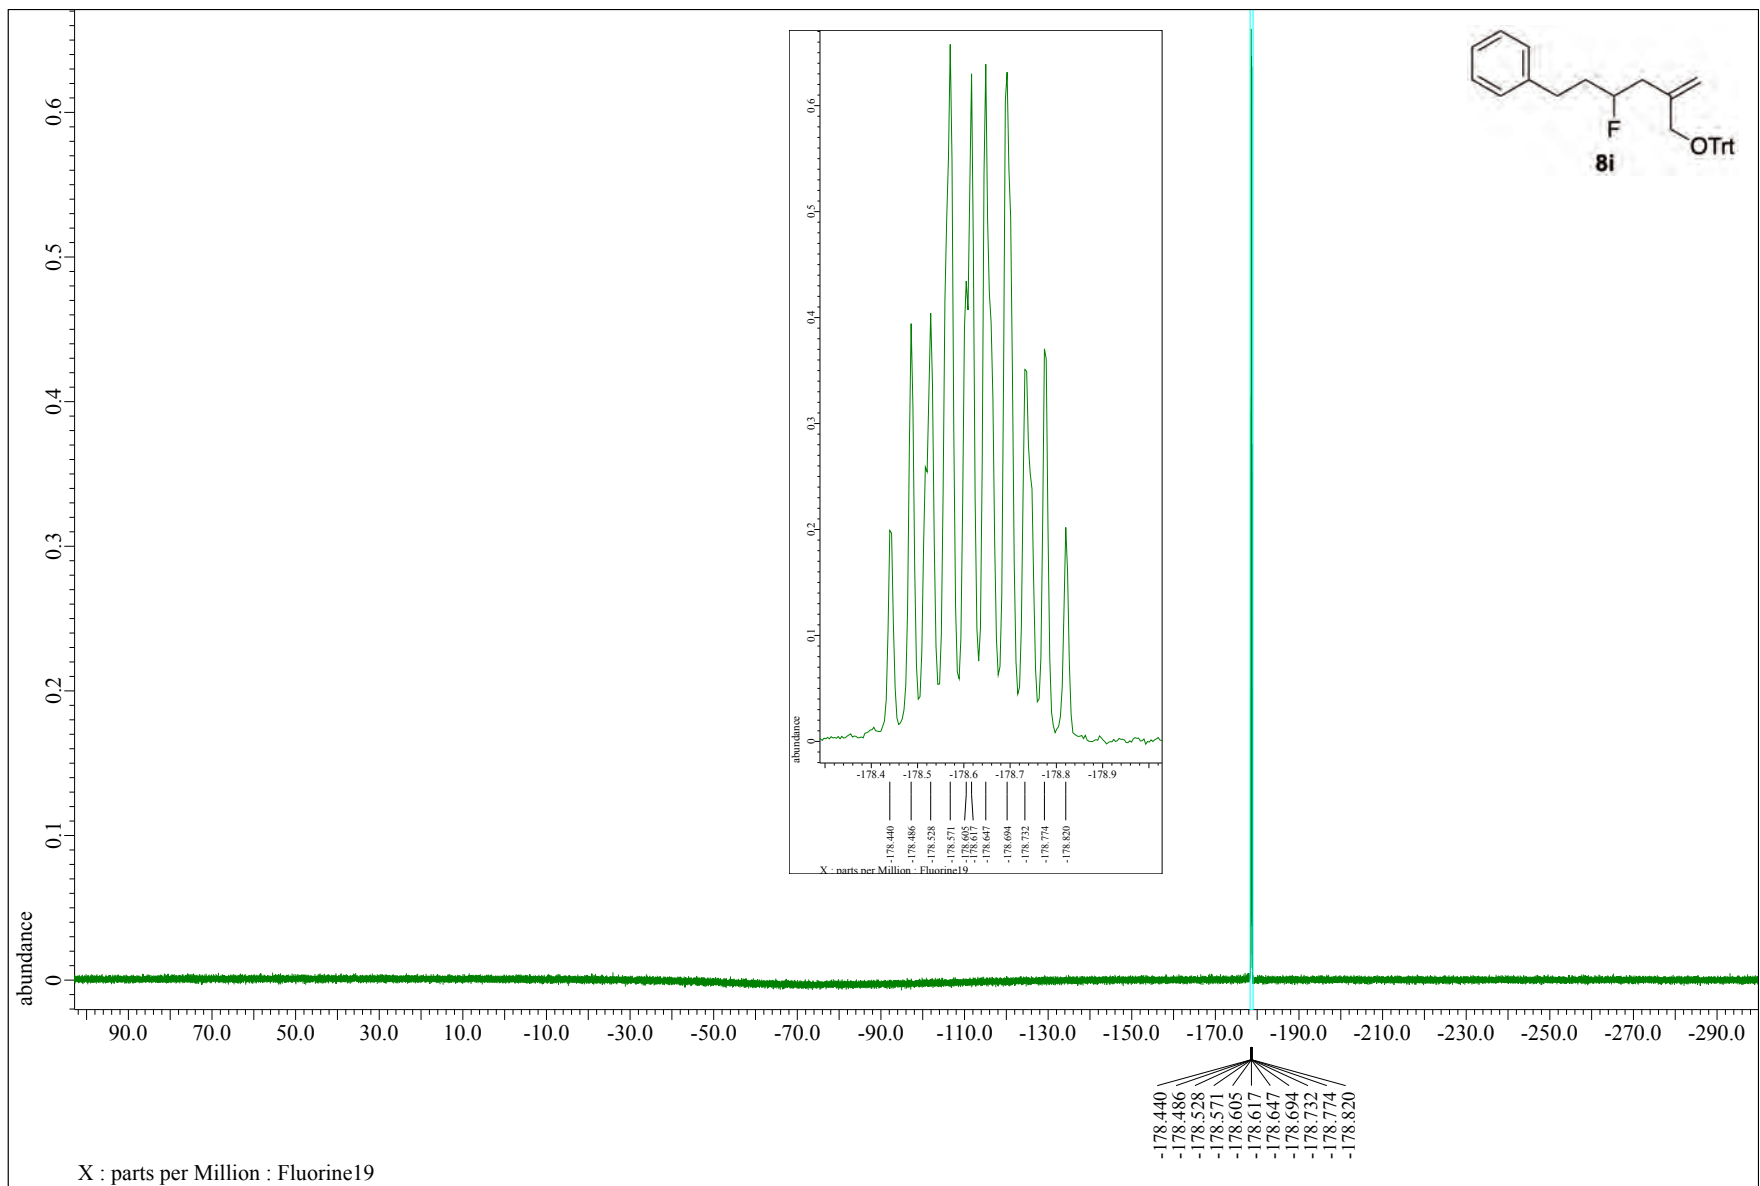

Sample No. : C:\Xcalibur\...\1228\BG\_231838\_8i\_

Instrument : Exactive Plus

Mobile phase solvent : MeOH

Operator name : hayashi harumi

Sample solvent : CHCl3

Date : 12/28/23 14:25:49

Instrumental method : C:\Xcalibur\methods\ESI\_100ul\S60\_100ul\_mz150\_2000pn.meth

Instrumental Analysis Division, Global Facility Center, Creative Research Institution, Hokkaido University

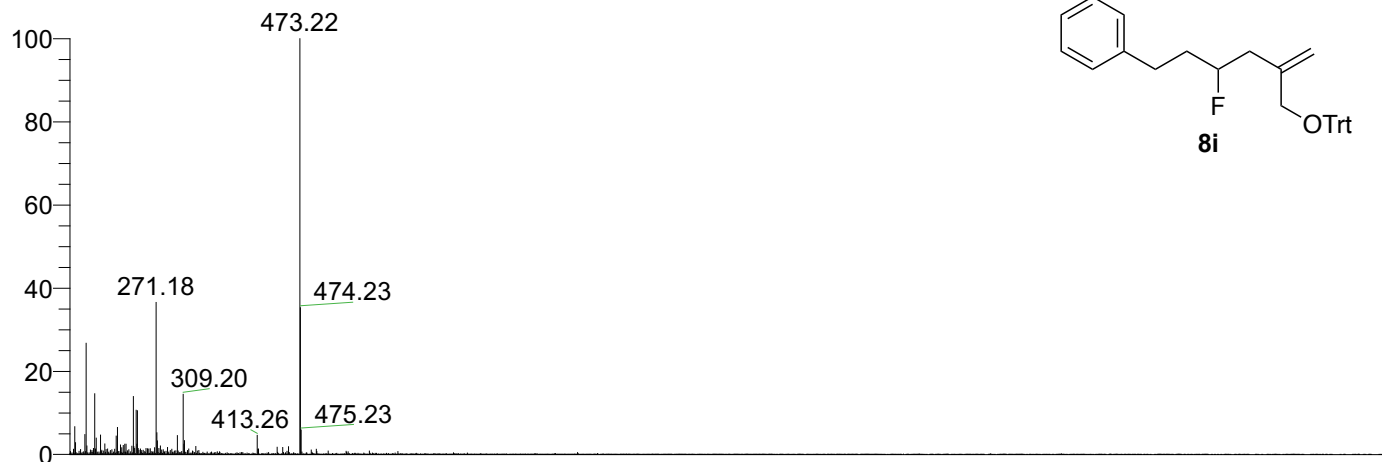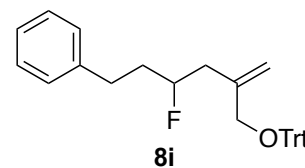

NL: 2.53E7  
BG\_231838\_8i\_pn#19  
-31 RT: 0.31-0.50  
AV: 7 T: FTMS + c  
ESI Full ms  
[150.00-2000.00]

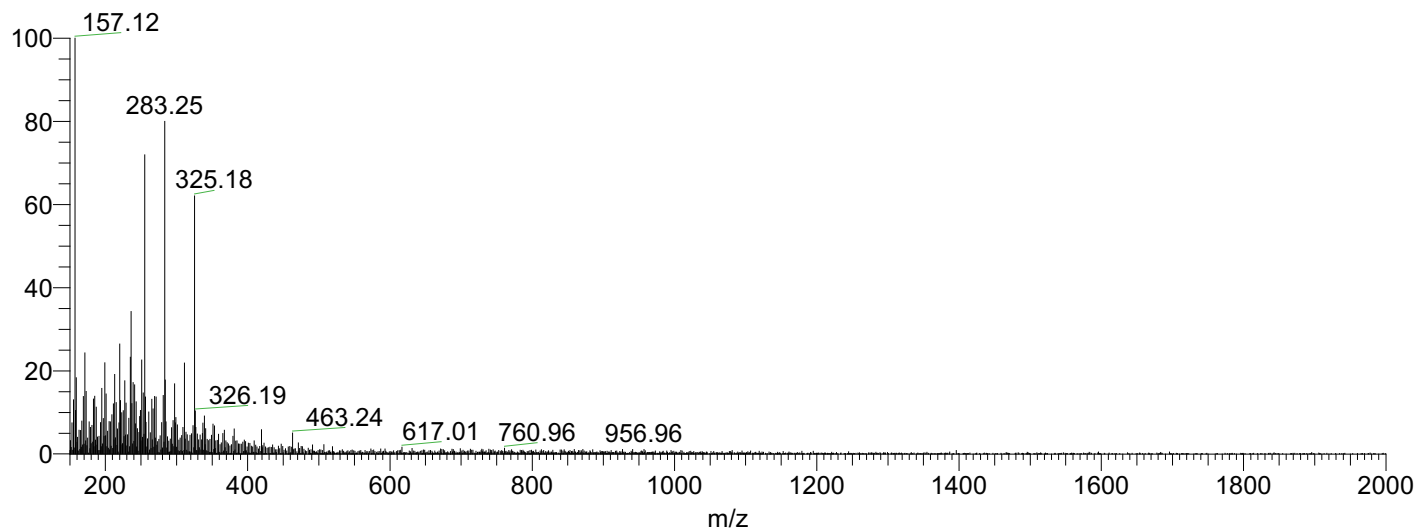

NL: 7.02E5  
BG\_231838\_8i\_pn#18  
-31 RT: 0.29-0.49  
AV: 7 T: FTMS - c ESI  
Full ms  
[150.00-2000.00]



Sample No. : C:\Xcalibur\...20231211\228\231838\_8i\_pn

Instrument : Exactive Plus

Mobile phase solvent : MeOH

Operator name : hayashi harumi

Sample solvent : CHCl3

Date : 12/28/23 10:27:18

Instrumental method : C:\Xcalibur\methods\ESI\_100ul\S60\_100ul\_mz150\_2000pn.meth

Instrumental Analysis Division, Global Facility Center, Creative Research Institution, Hokkaido University

231838\_8i\_pn #21-25 RT: 0.34-0.40 AV: 3 NL: 9.50E6

T: FTMS + p ESI Full ms [150.0000-2000.0000]

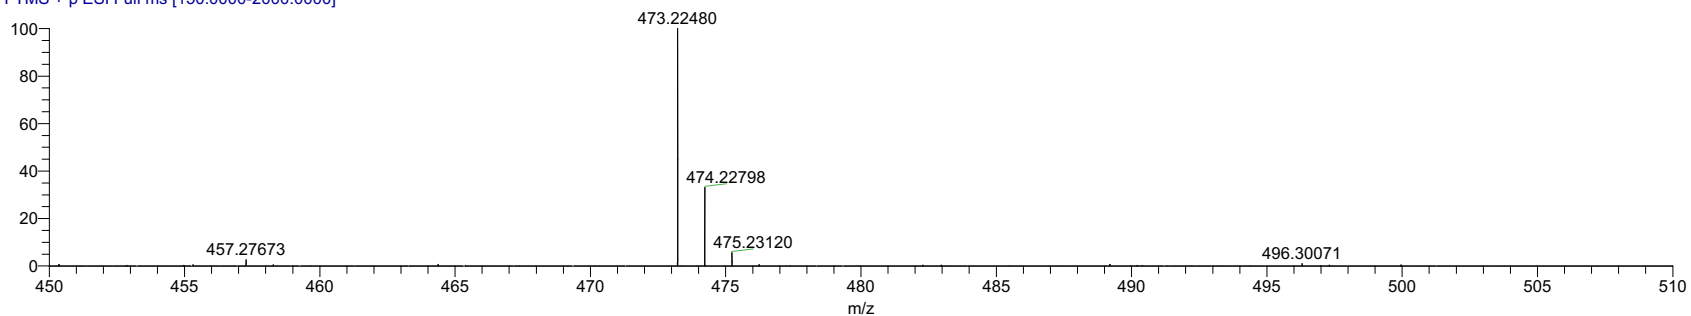

231838\_8i\_pn #25-28 RT: 0.40-0.44 AV: 2 NL: 7.85E6

T: FTMS + p ESI Full ms [150.0000-2000.0000]

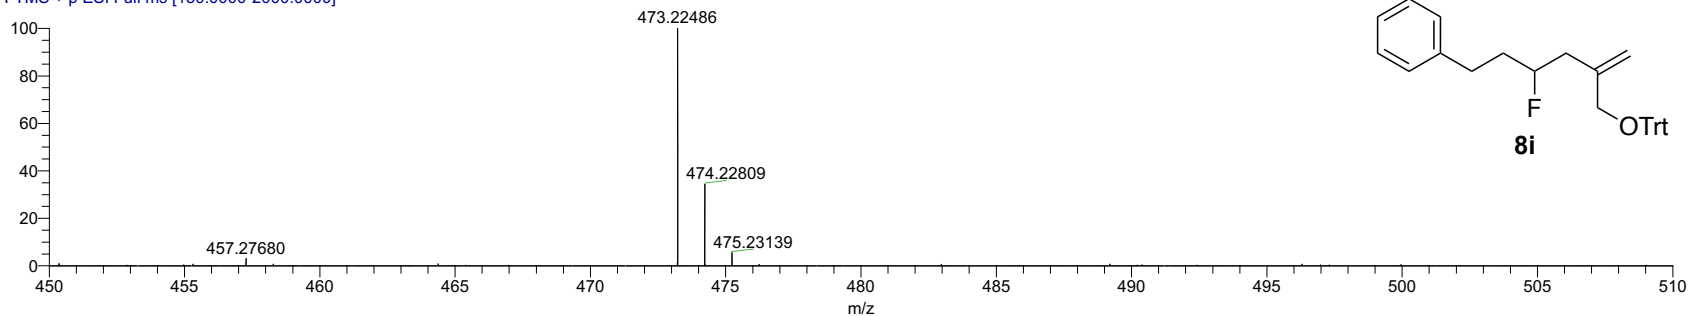

231838\_8i\_pn #29-32 RT: 0.47-0.50 AV: 2 NL: 3.55E6

T: FTMS + p ESI Full ms [150.0000-2000.0000]

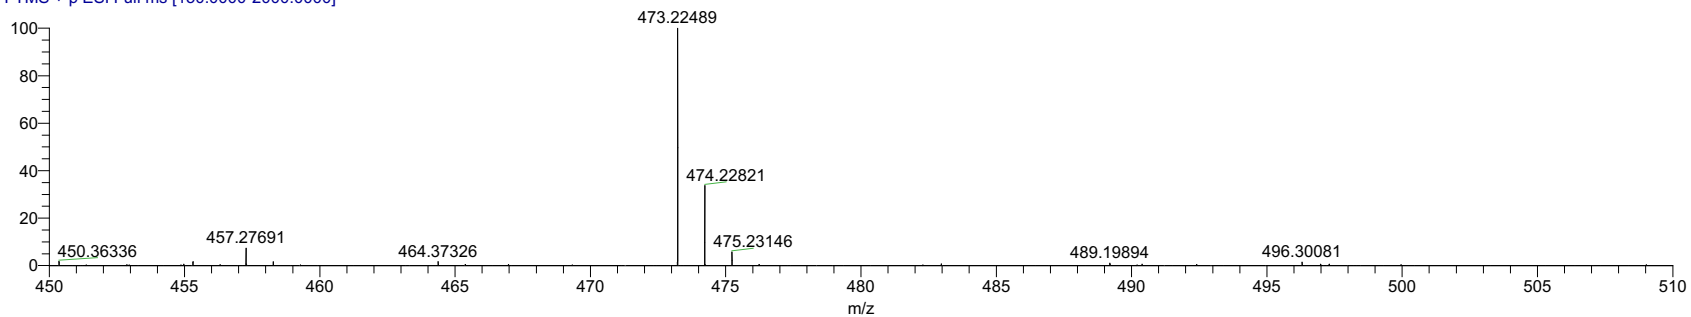

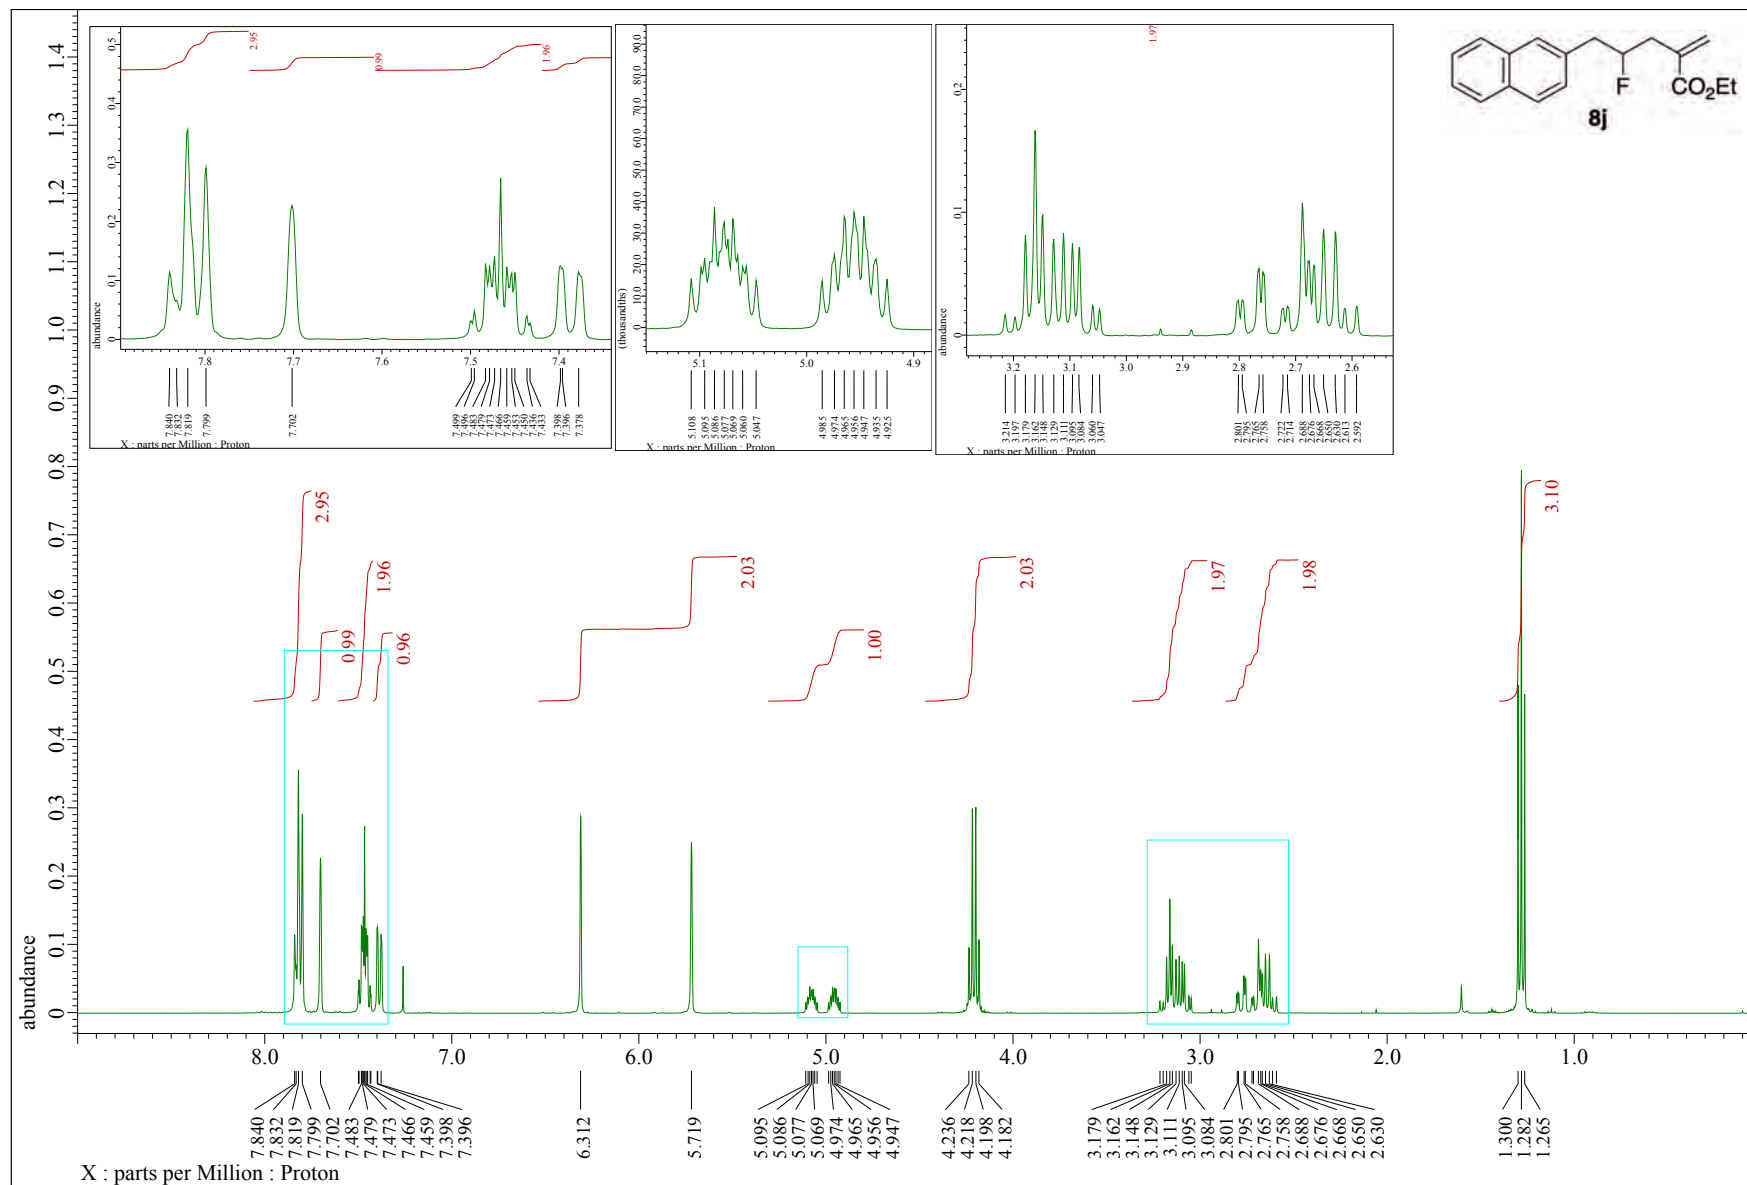

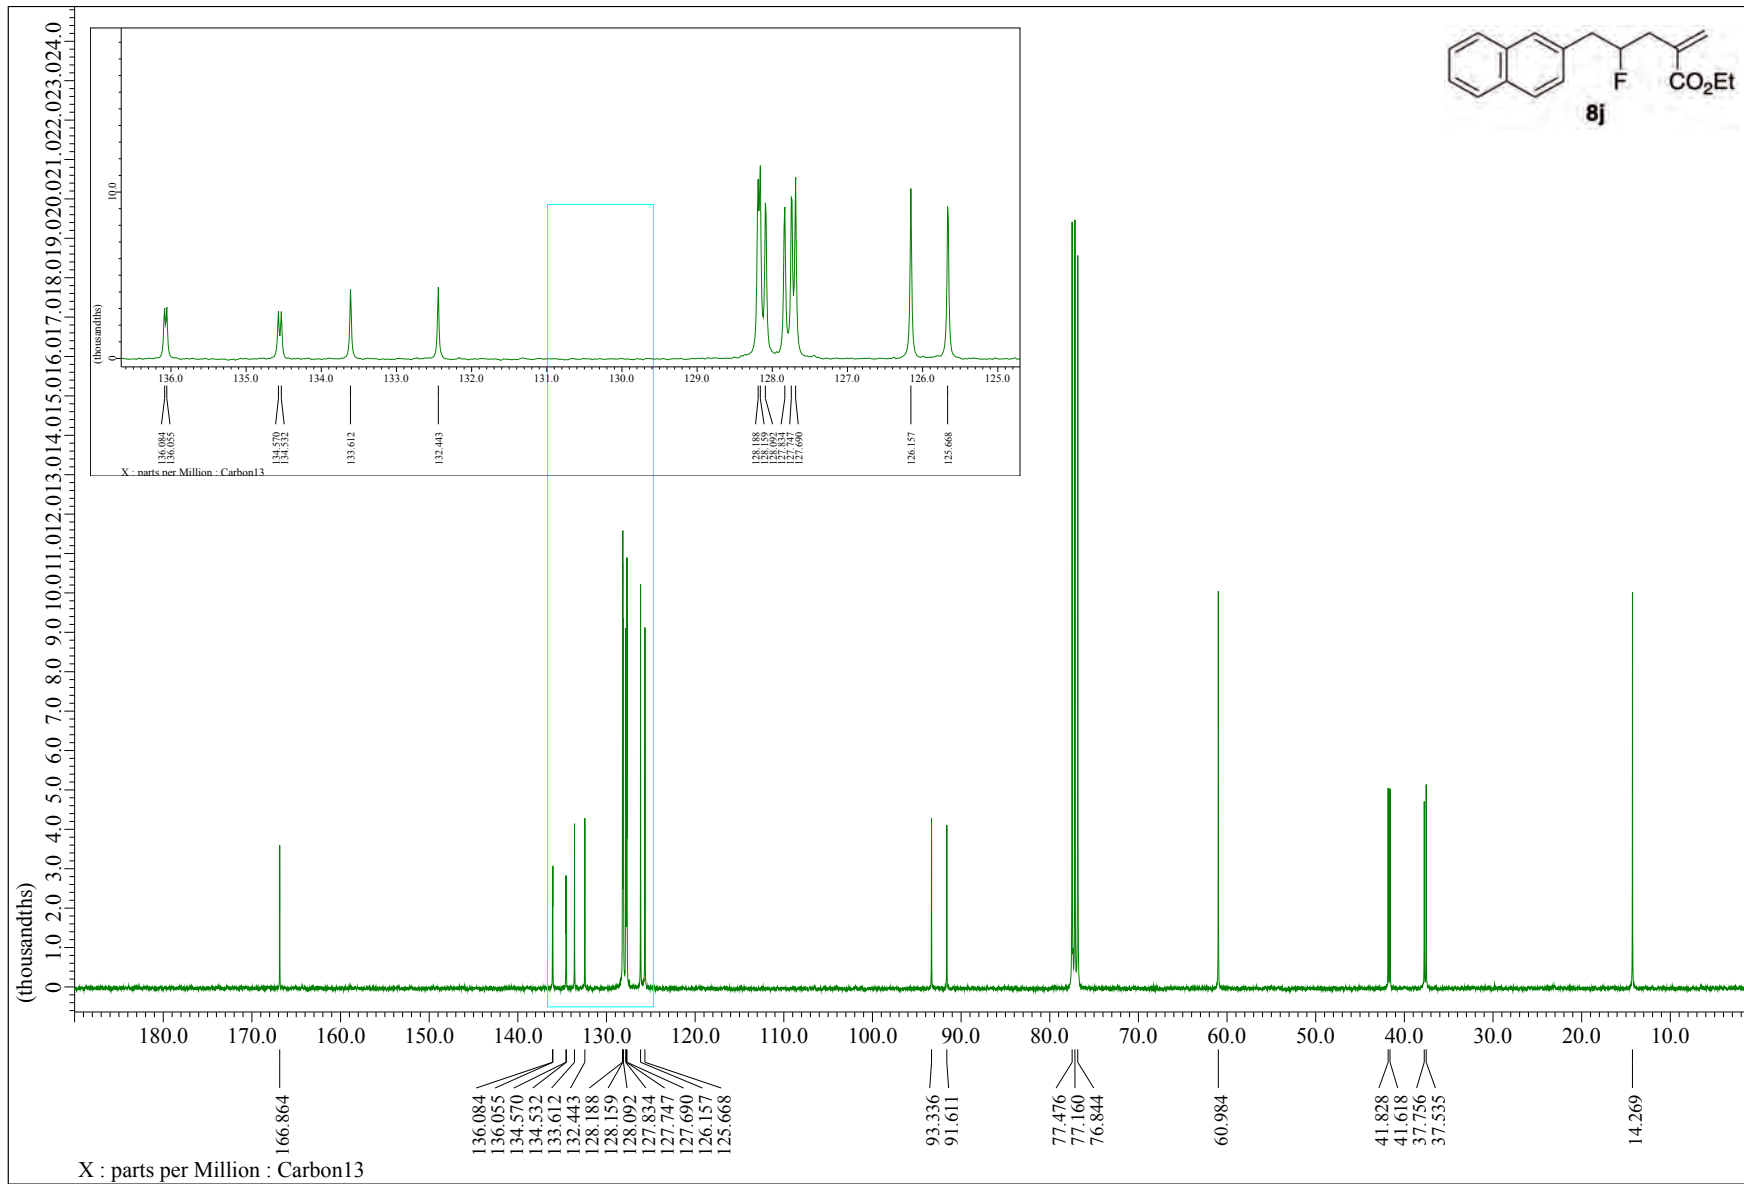

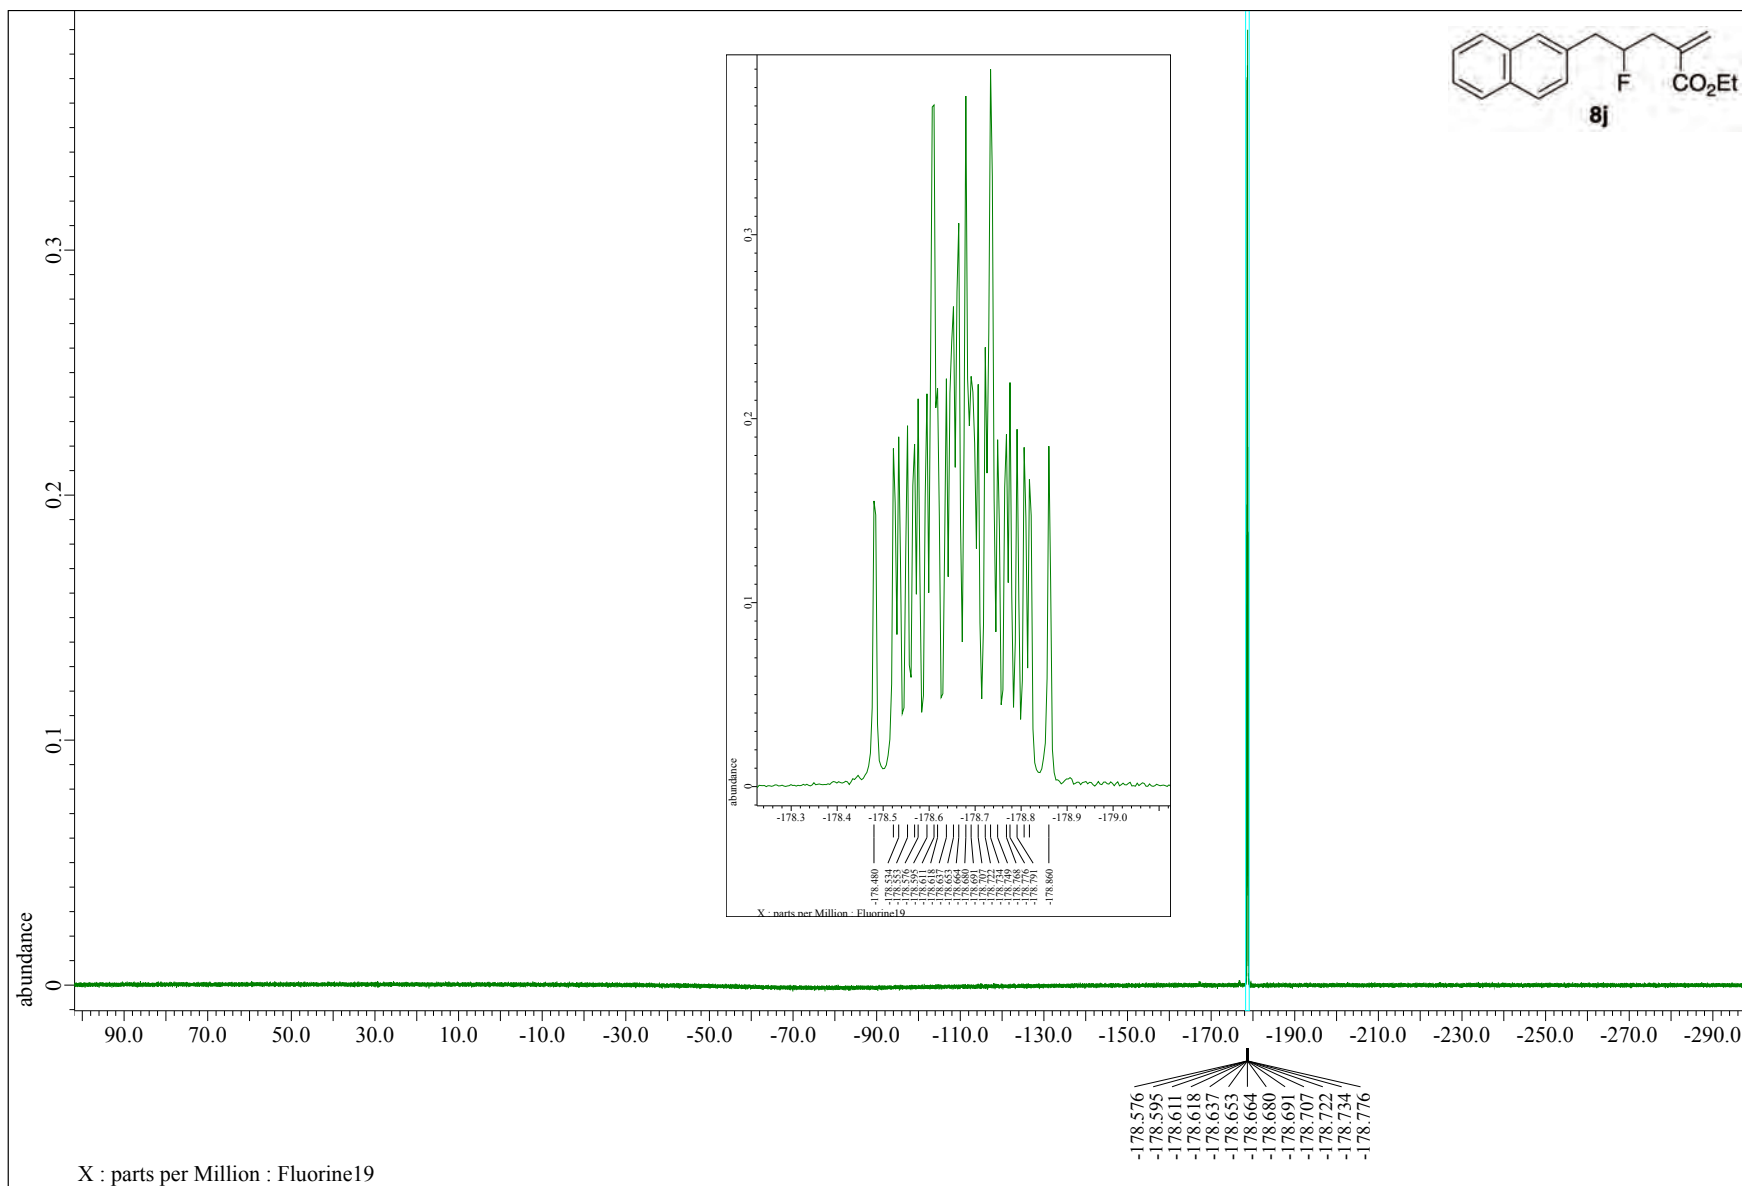

Sample No. : C:\Xcalibur\...1228\BG\_231839\_8j\_

Instrument : Exactive Plus

Mobile phase solvent : MeOH

Operator name : hayashi harumi

Sample solvent : CHCl3

Date : 12/28/23 14:01:42

Instrumental method : C:\Xcalibur\methods\ESI\_100ul\S60\_100ul\_mz100\_1500pn.meth

Instrumental Analysis Division, Global Facility Center, Creative Research Institution, Hokkaido University

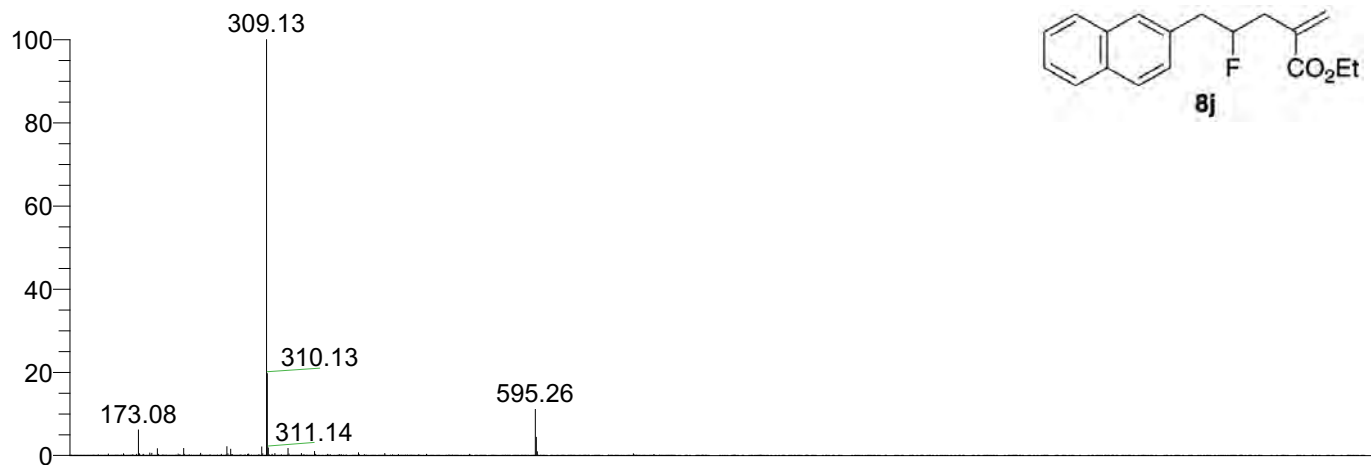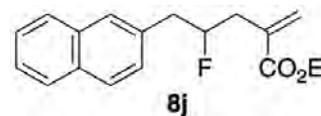

NL: 5.06E8  
BG\_231839\_8j\_pn#19  
-32 RT: 0.31-0.48  
AV: 7 T: FTMS + c  
ESI Full ms  
[100.00-1500.00]

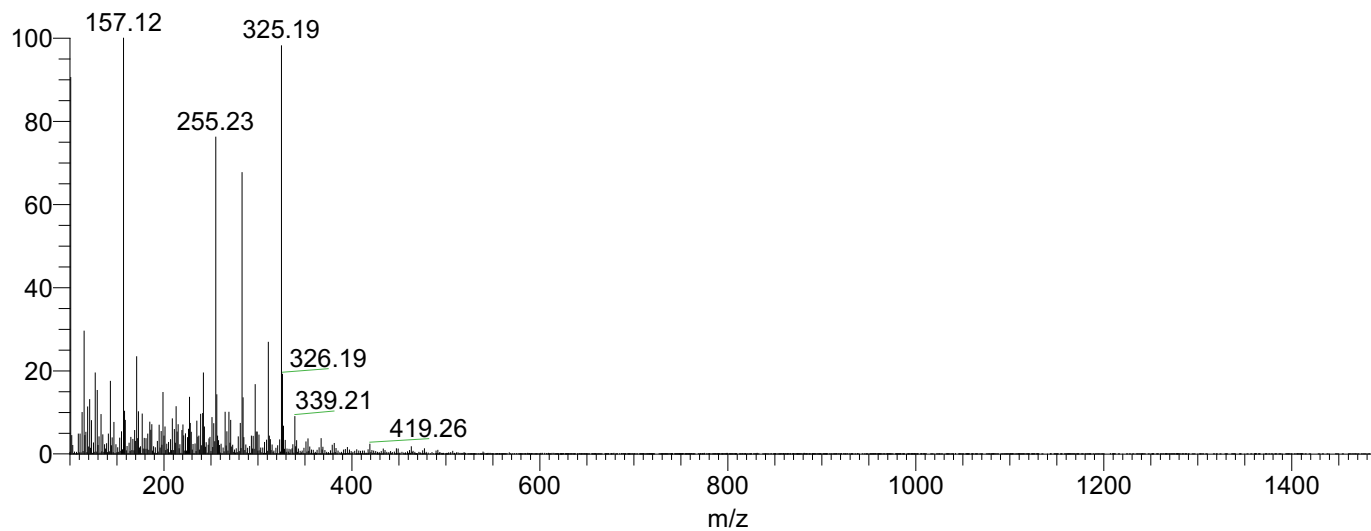

NL: 4.54E6  
BG\_231839\_8j\_pn#19  
-32 RT: 0.32-0.50  
AV: 7 T: FTMS - c ESI  
Full ms  
[100.00-1500.00]

Sample No. : C:\Xcalibur\...1202312\11228\231839\_8j\_pn

Instrument : Exactive Plus

Mobile phase solvent : MeOH

Operator name : hayashi harumi

Sample solvent : CHCl3

Date : 12/28/23 10:32:46

Instrumental method : C:\Xcalibur\methods\ESI\_100ul\S60\_100ul\_mz100\_1500pn.meth

Instrumental Analysis Division, Global Facility Center, Creative Research Institution, Hokkaido University

231839\_8j\_pn #22-25 RT: 0.37-0.39 AV: 2 NL: 1.91E8

T: FTMS + p ESI Full ms [100.0000-1500.0000]

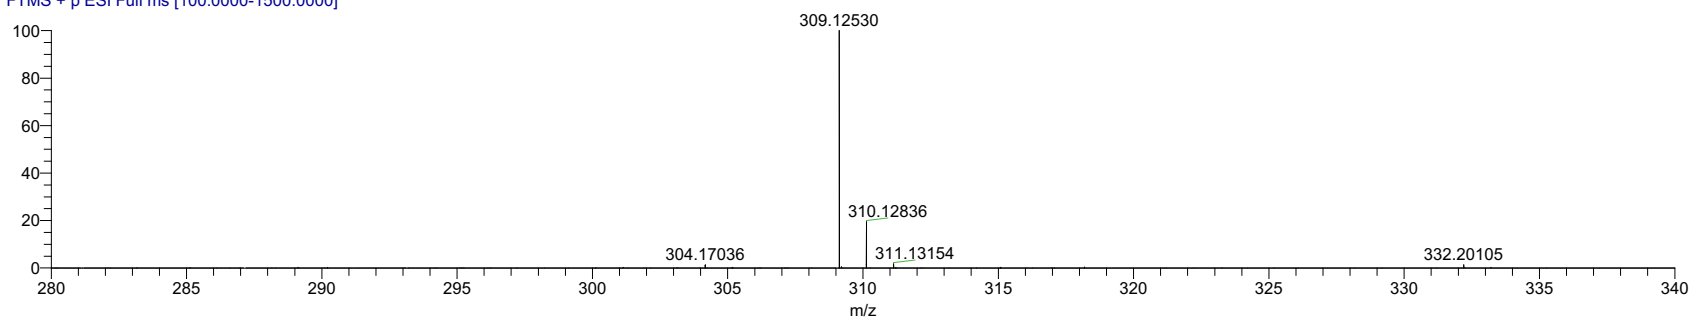

231839\_8j\_pn #25-29 RT: 0.39-0.45 AV: 3 NL: 1.49E8

T: FTMS + p ESI Full ms [100.0000-1500.0000]

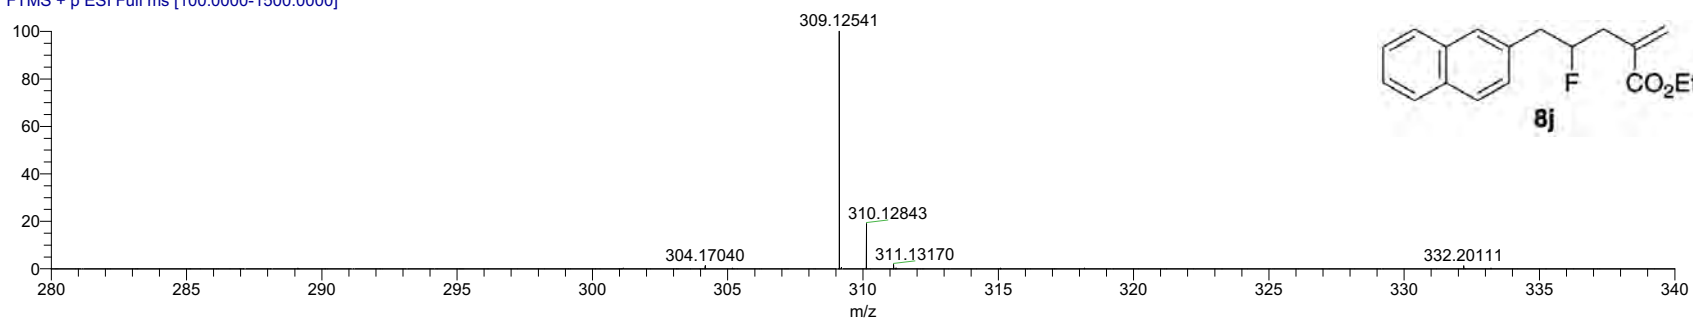

231839\_8j\_pn #29-32 RT: 0.45-0.48 AV: 2 NL: 7.30E7

T: FTMS + p ESI Full ms [100.0000-1500.0000]

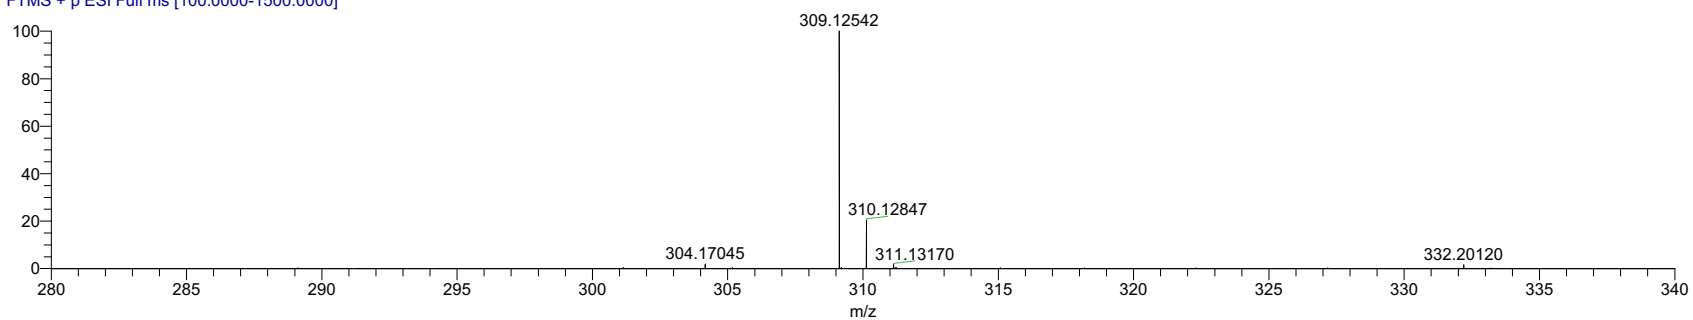

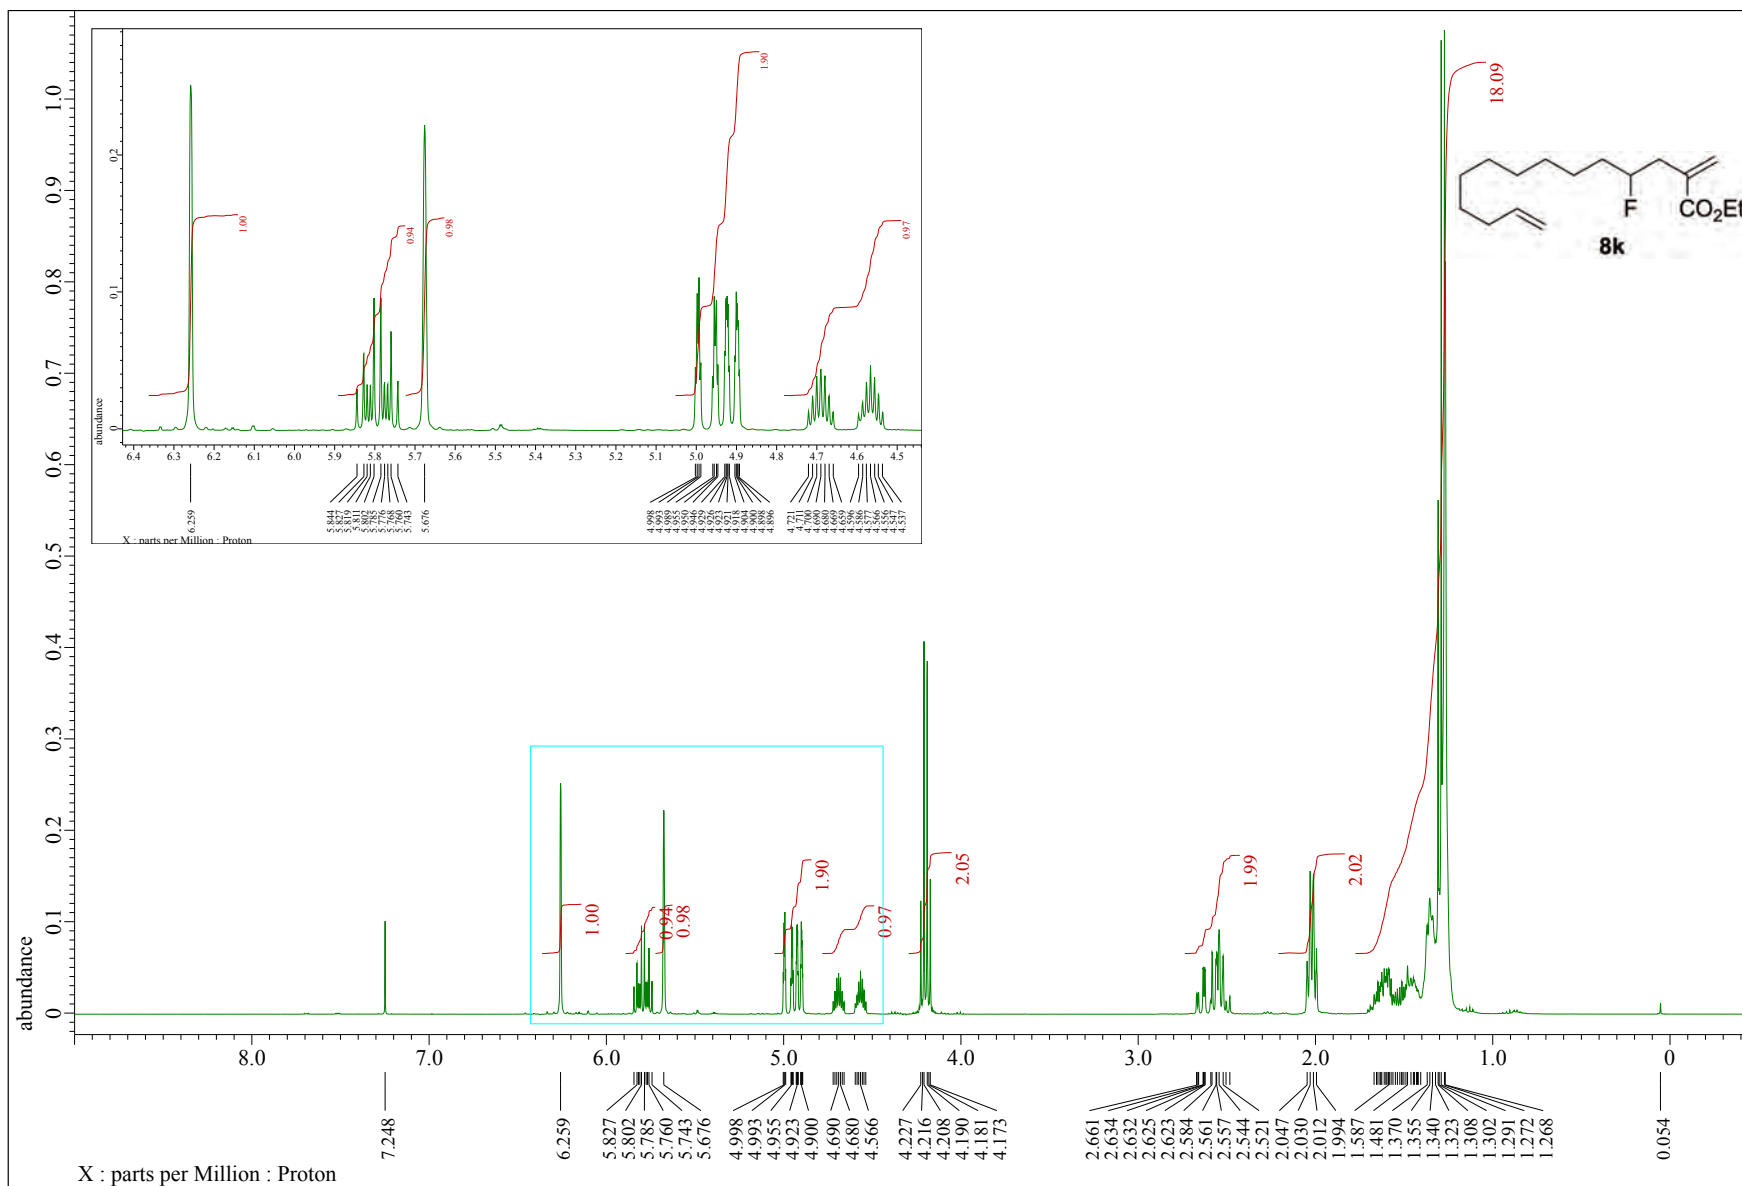

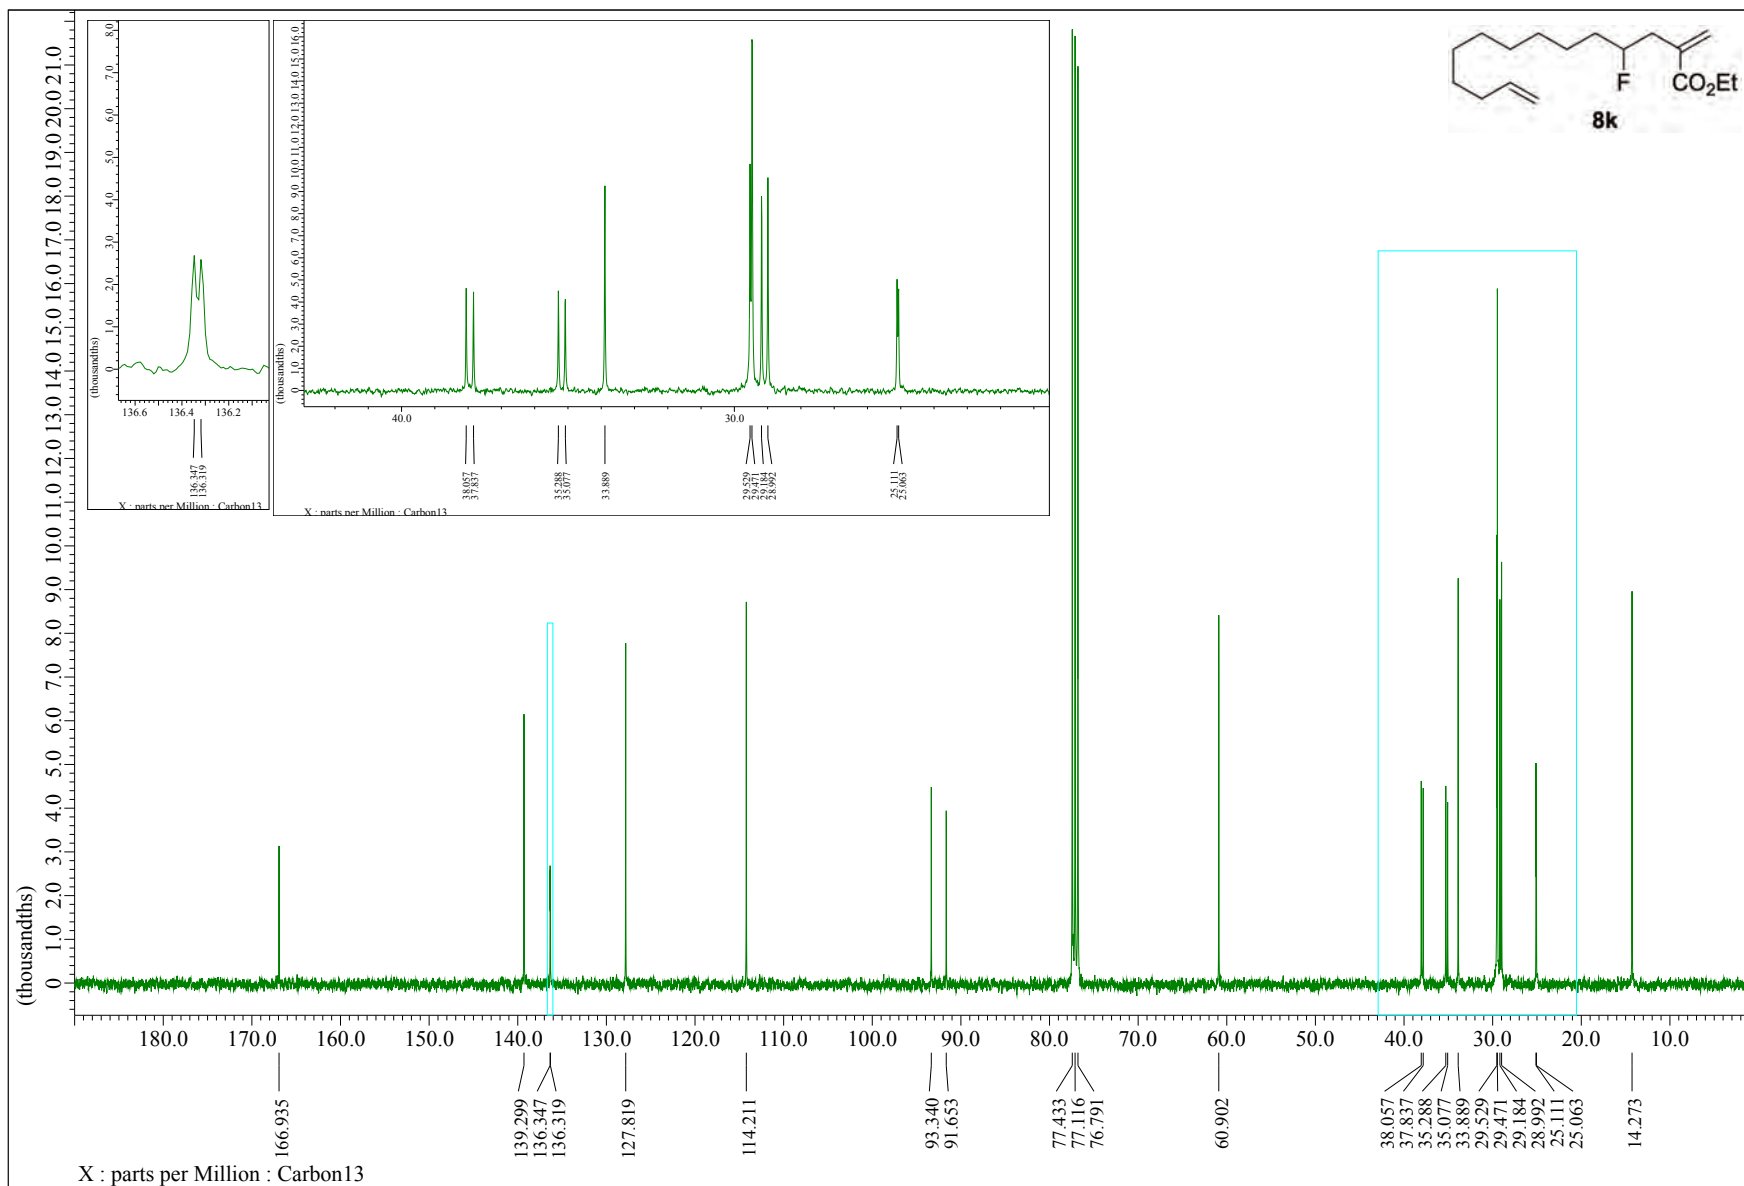



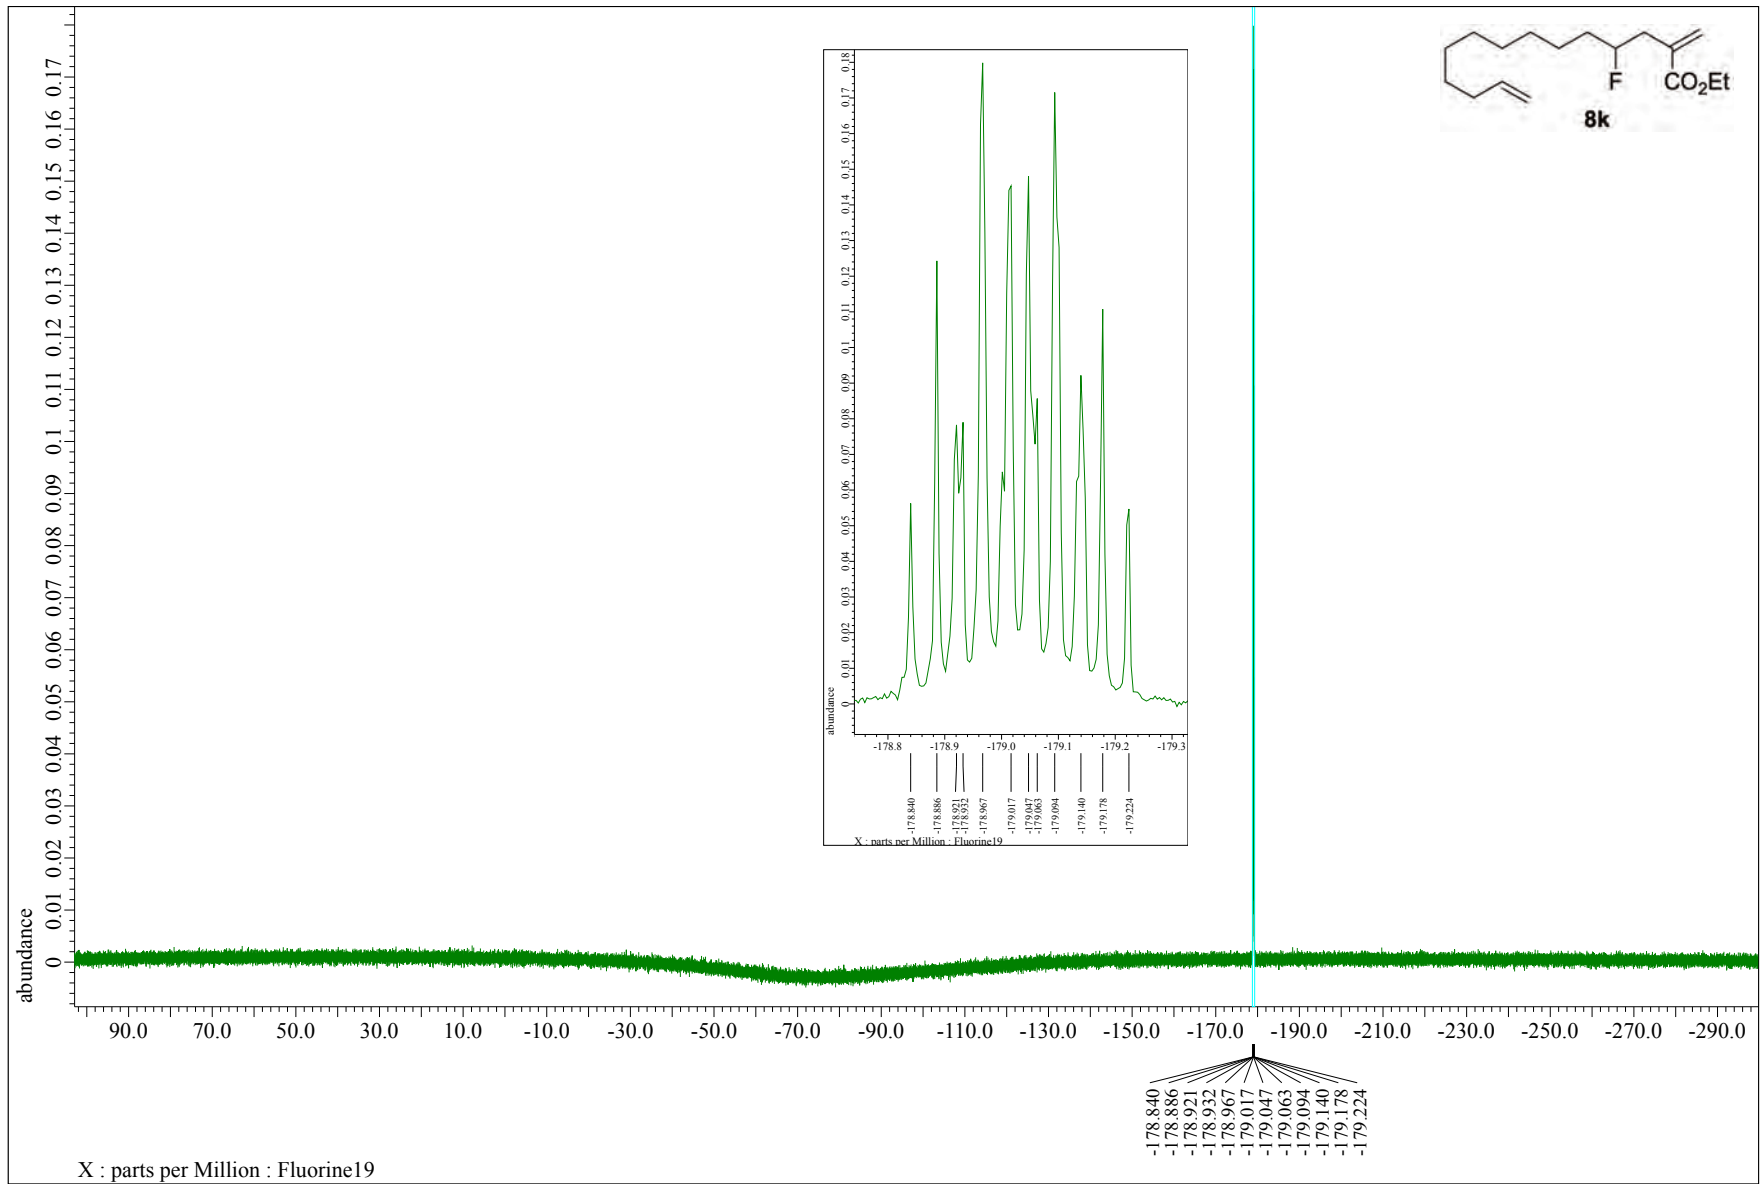

Sample No. : C:\Xcalibur\...1228\BG\_231840\_8I\_

Instrument : Exactive Plus

Mobile phase solvent : MeOH

Operator name : hayashi harumi

Sample solvent : CHCl3

Date : 12/28/23 14:02:08

Instrumental method : C:\Xcalibur\methods\ESI\_100ul\S60\_100ul\_mz100\_1500pn.meth

Instrumental Analysis Division, Global Facility Center, Creative Research Institution, Hokkaido University

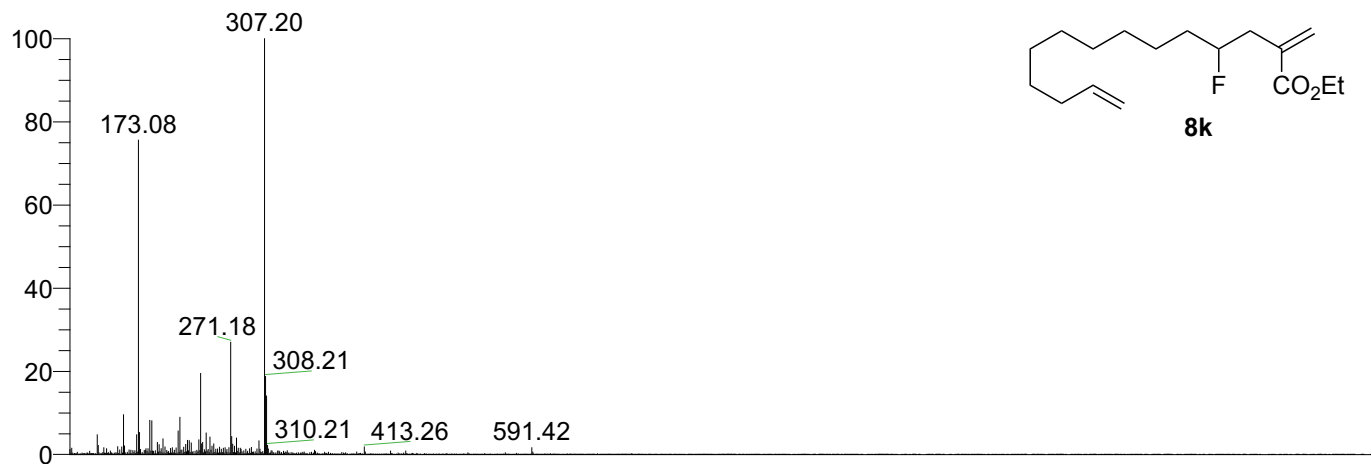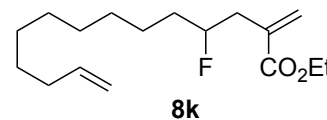

NL: 2.52E7  
BG\_231840\_8k\_pn#1  
8-31 RT: 0.31-0.50  
AV: 7 T: FTMS + c  
ESI Full ms  
[100.00-1500.00]

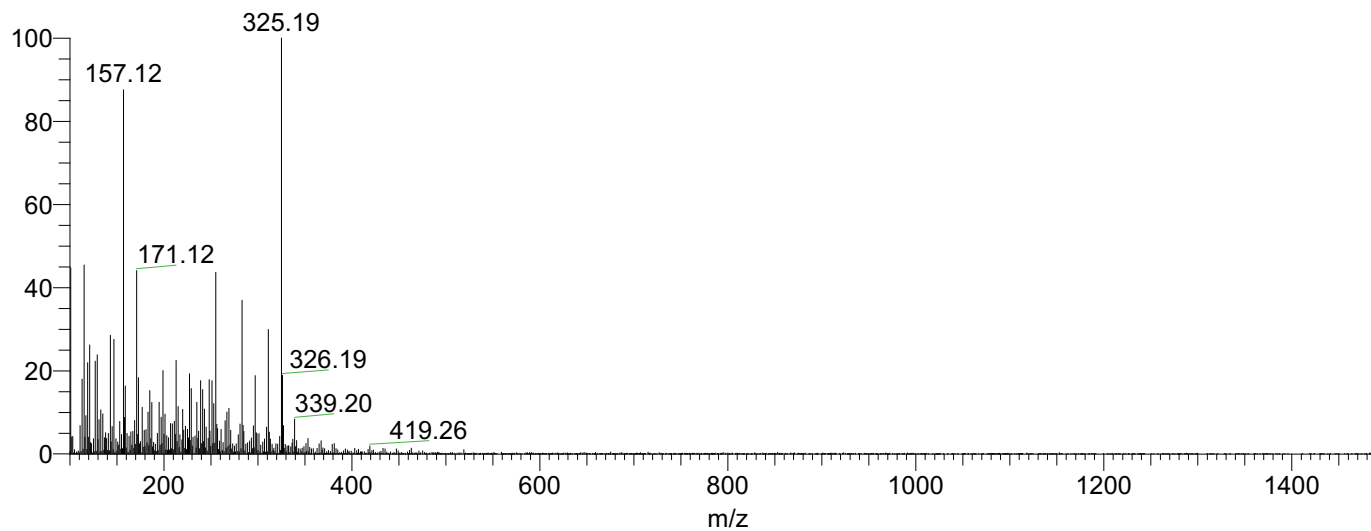

NL: 1.63E6  
BG\_231840\_8k\_pn#1  
8-31 RT: 0.30-0.48  
AV: 7 T: FTMS - c ESI  
Full ms  
[100.00-1500.00]

Sample No. : C:\Xcalibur\...20231211\228\231840\_8k\_pn

Instrument : Exactive Plus

Mobile phase solvent : MeOH

Operator name : hayashi harumi

Sample solvent : CHCl<sub>3</sub>

Date : 12/28/23 10:38:14

Instrumental method : C:\Xcalibur\methods\ESI\_100ul\S60\_100ul\_mz100\_1500pn.meth

Instrumental Analysis Division, Global Facility Center, Creative Research Institution, Hokkaido University

231840\_8k\_pn#21-25 RT: 0.35-0.41 AV: 3 NL: 9.91E6

T: FTMS + p ESI Full ms [100.0000-1500.0000]

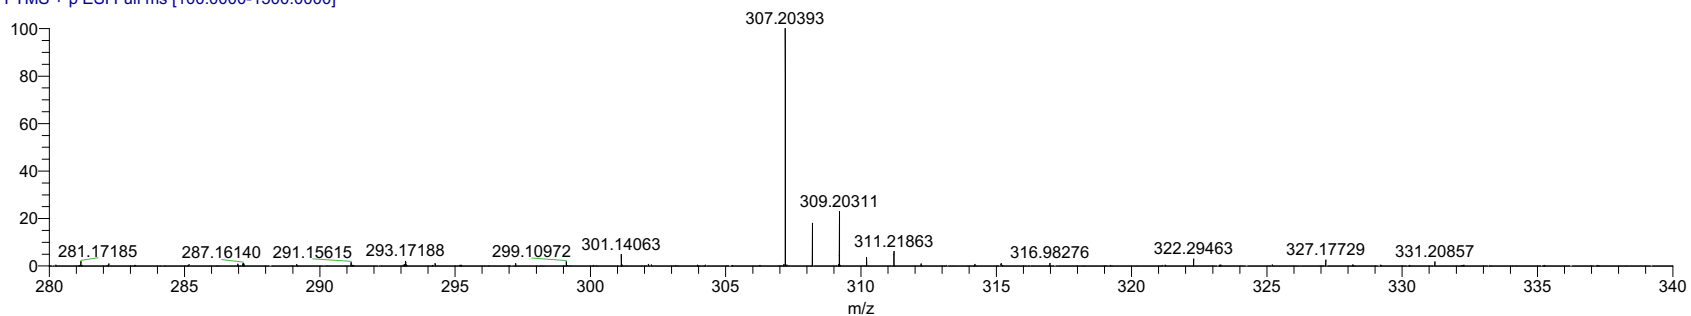

231840\_8k\_pn#25-28 RT: 0.41-0.44 AV: 2 NL: 8.06E6

T: FTMS + p ESI Full ms [100.0000-1500.0000]

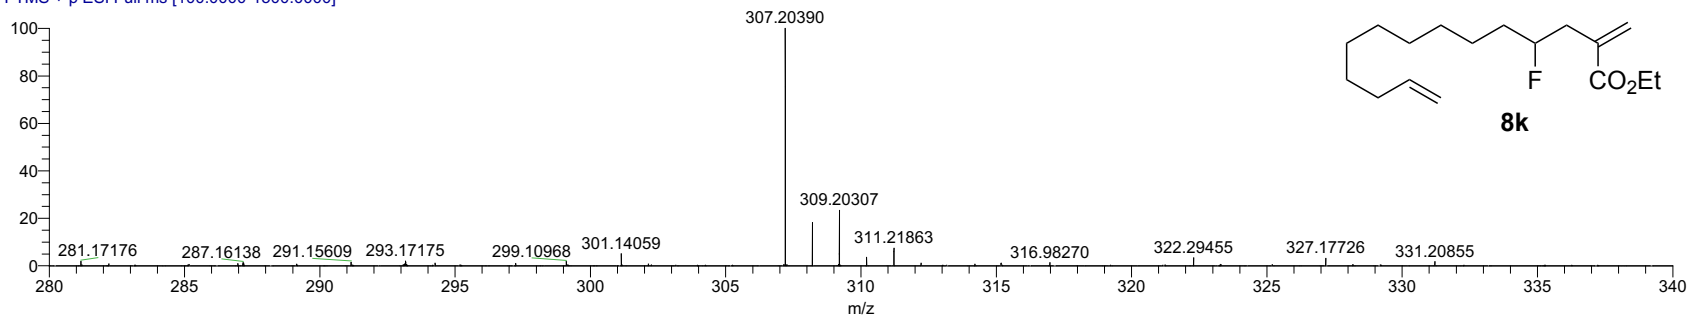

231840\_8k\_pn#28-31 RT: 0.47-0.50 AV: 2 NL: 2.79E6

T: FTMS + p ESI Full ms [100.0000-1500.0000]

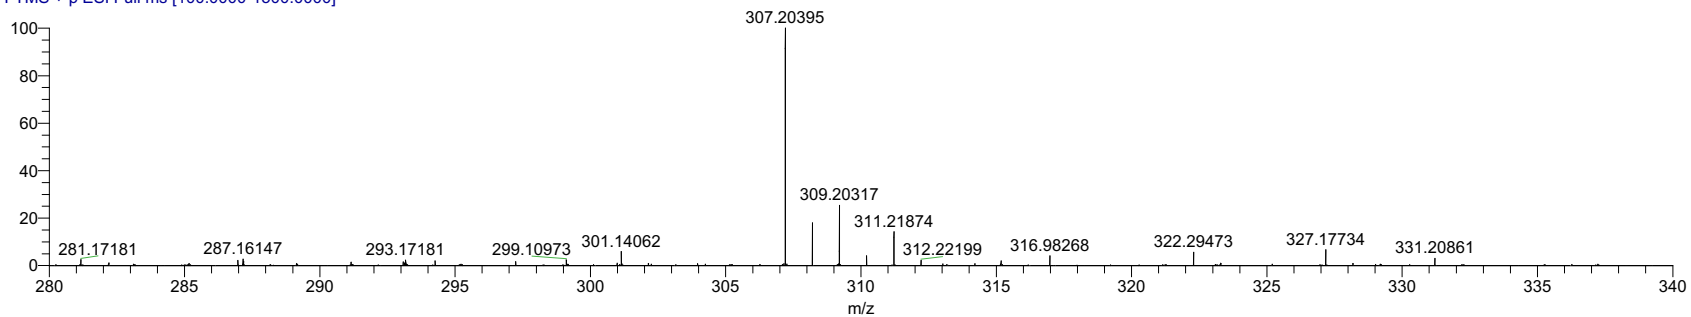

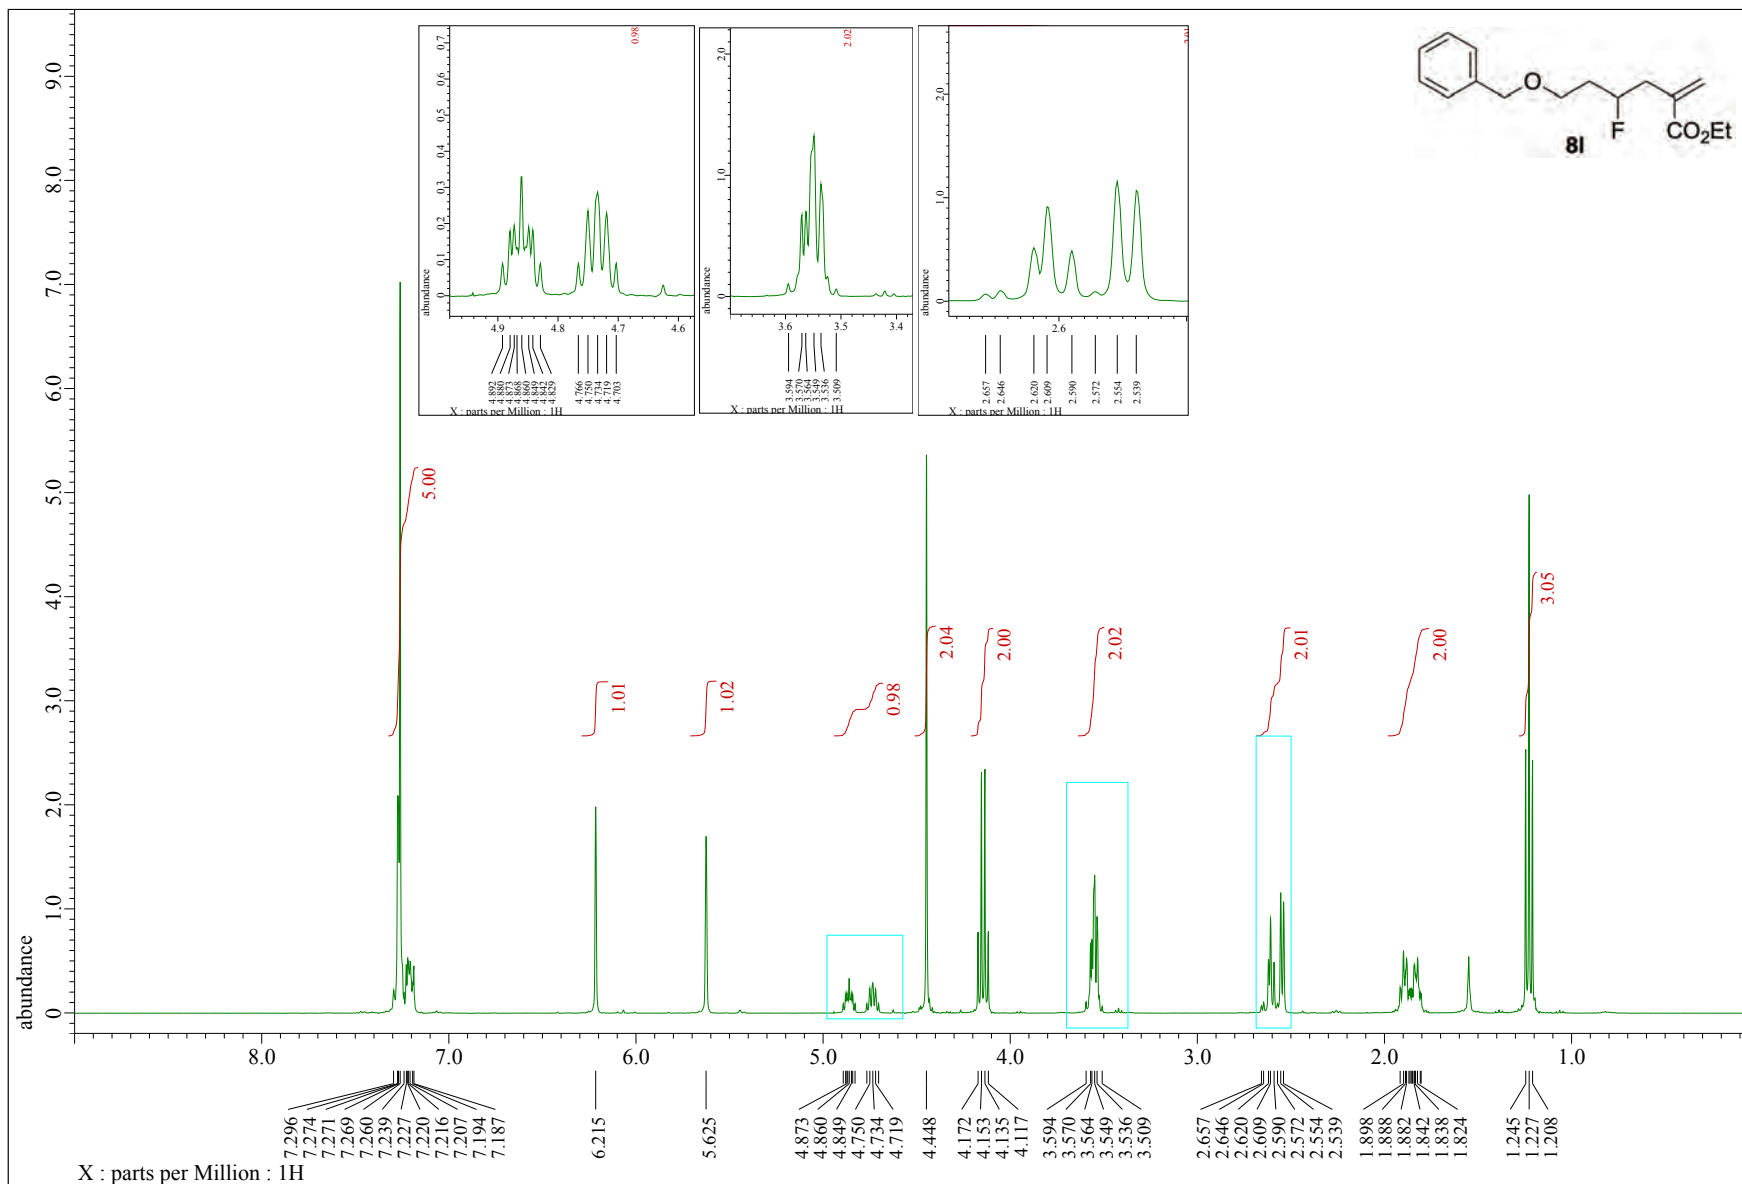

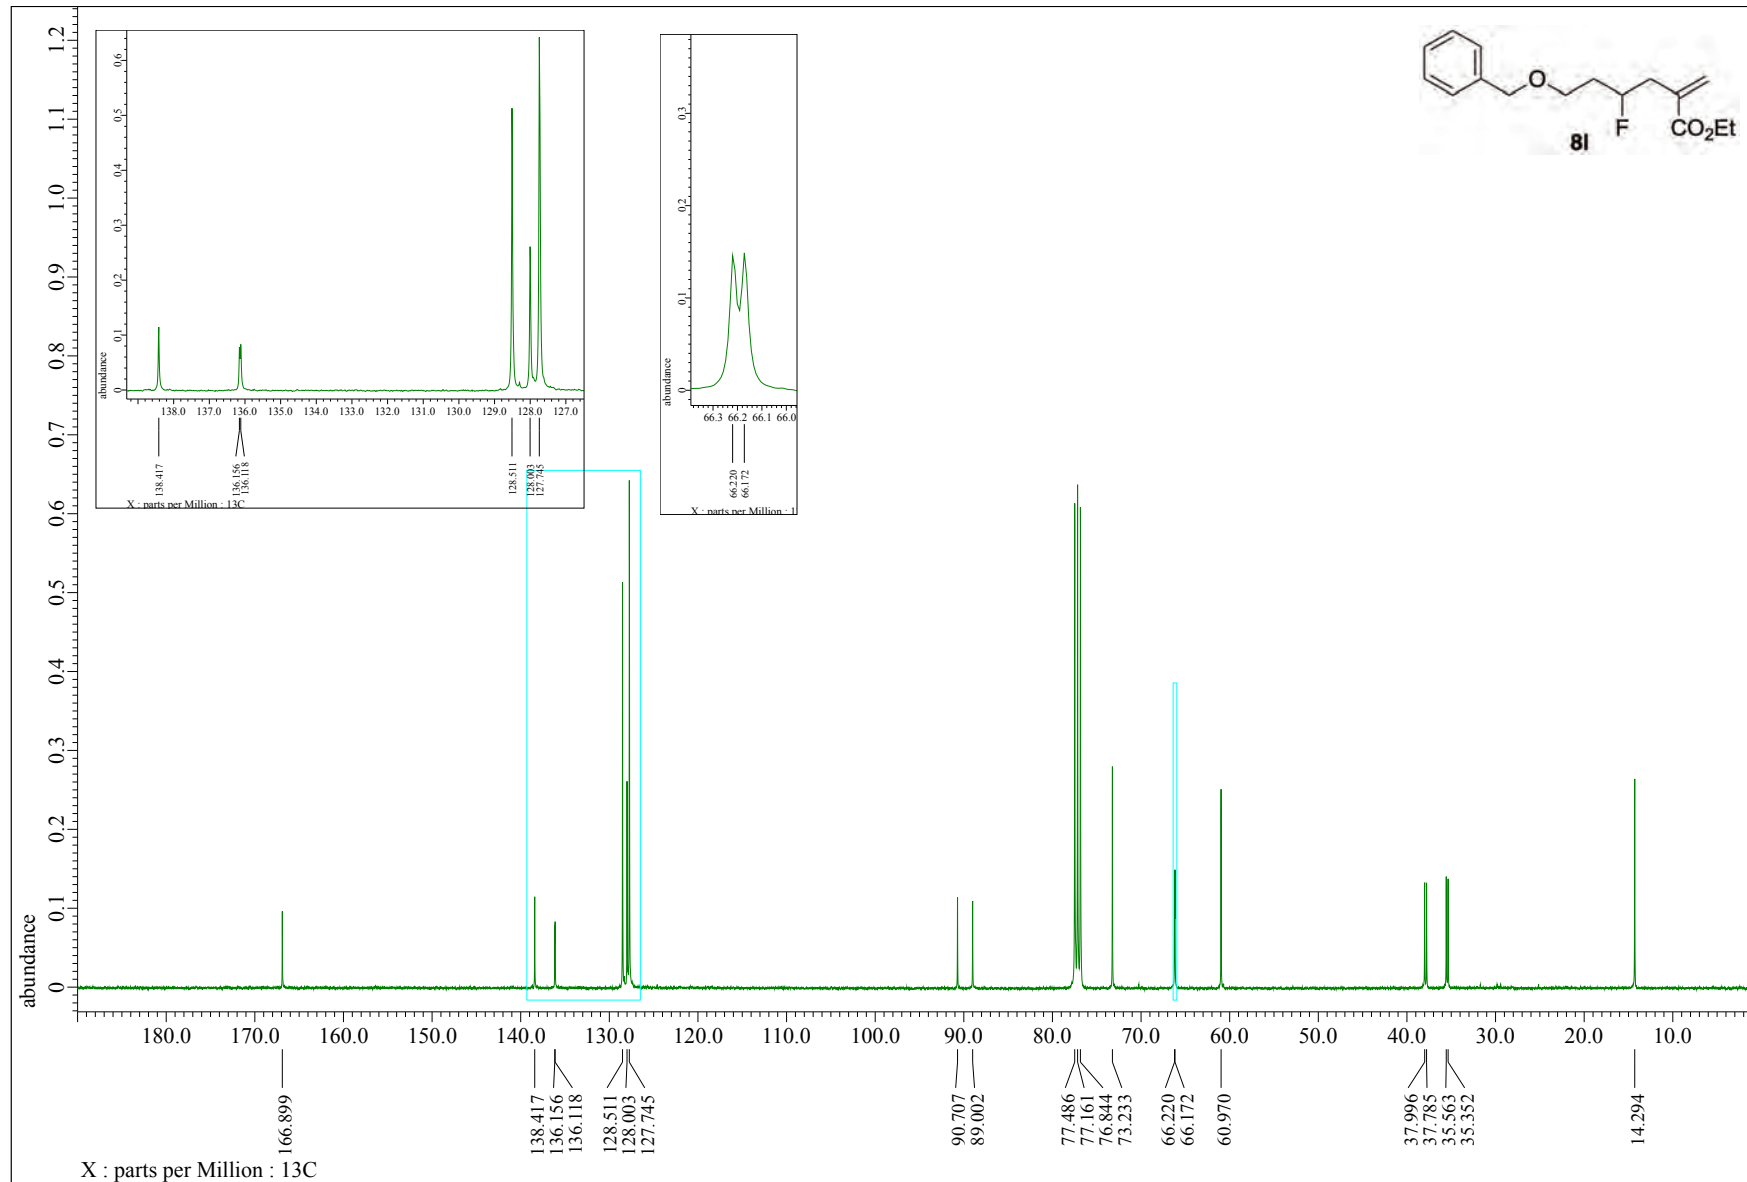

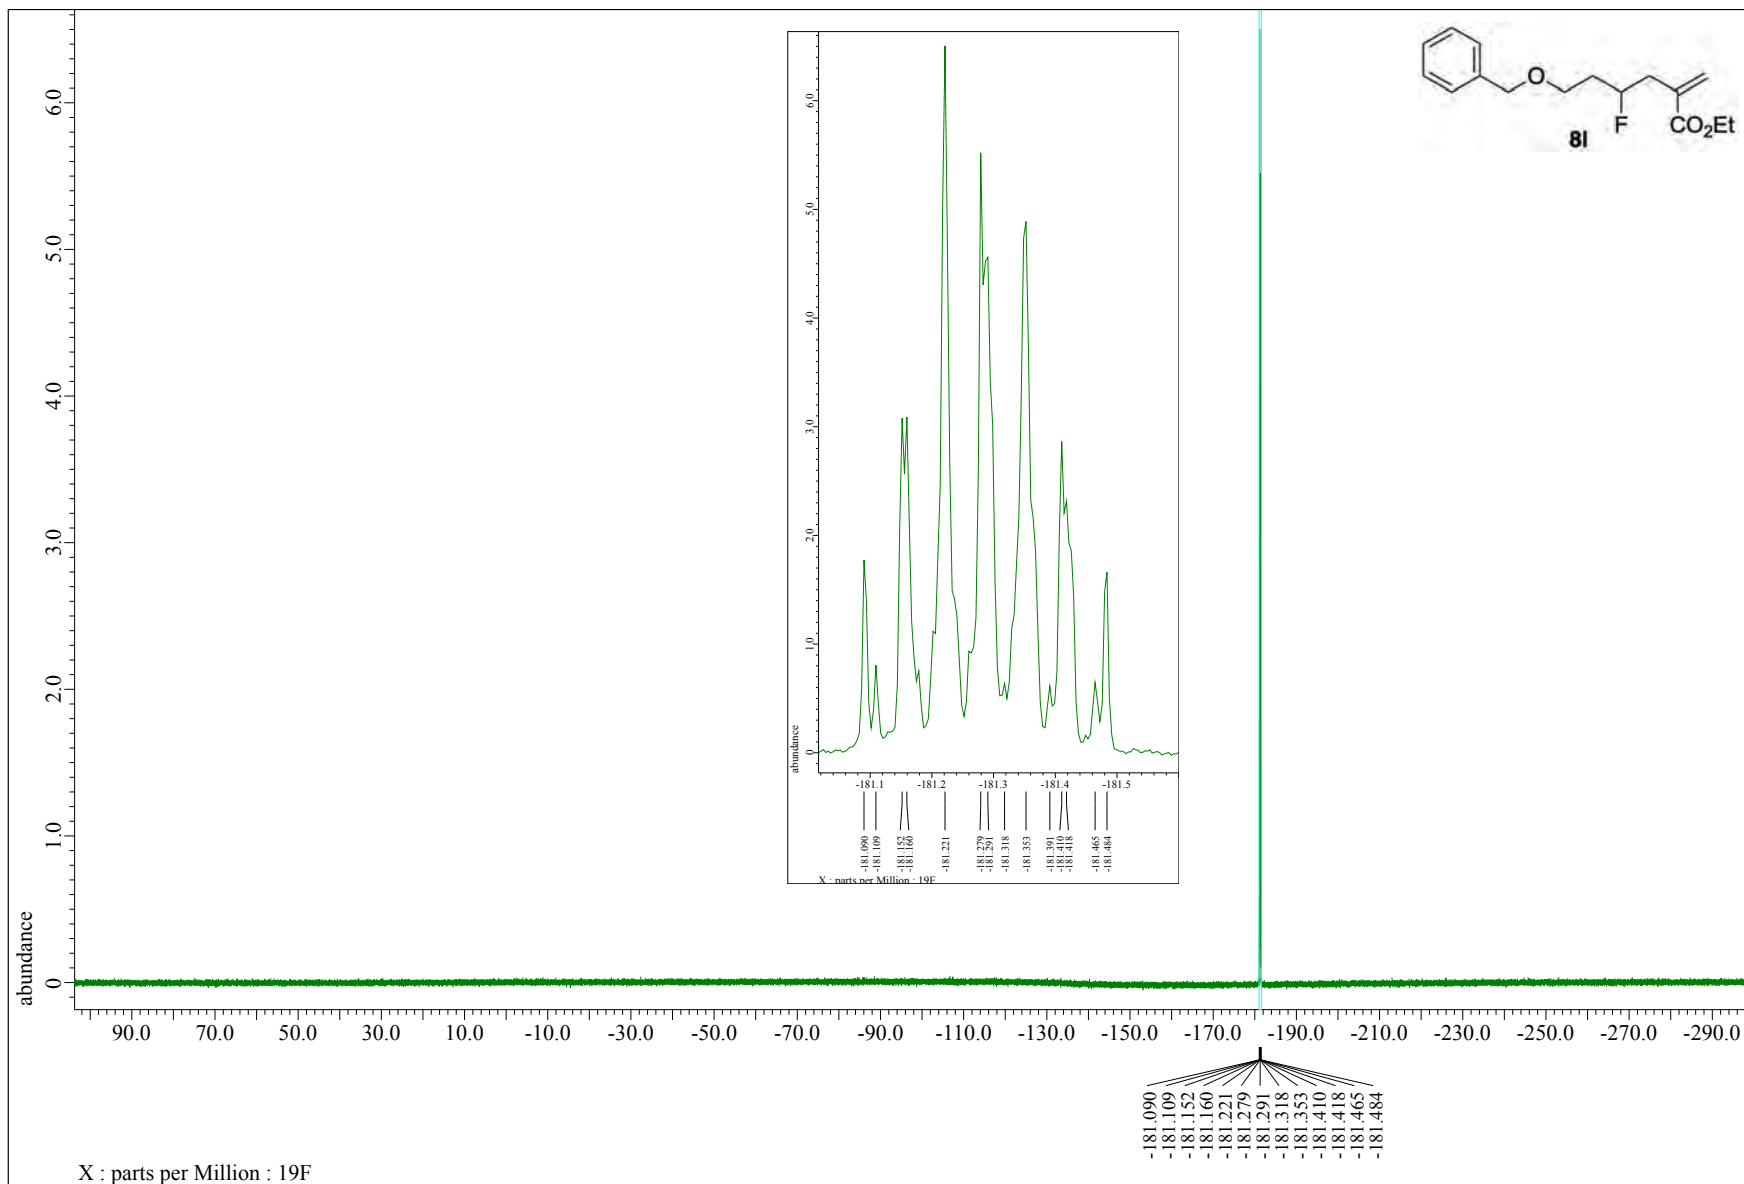

Sample No. : C:\Xcalibur\...1228\BG\_231841\_8I\_

Instrument : Exactive Plus

Mobile phase solvent : MeOH

Operator name : hayashi harumi

Sample solvent : CHCl3

Date : 12/28/23 14:02:33

Instrumental method : C:\Xcalibur\methods\ESI\_100ul\S60\_100ul\_mz100\_1500pn.meth

Instrumental Analysis Division, Global Facility Center, Creative Research Institution, Hokkaido University

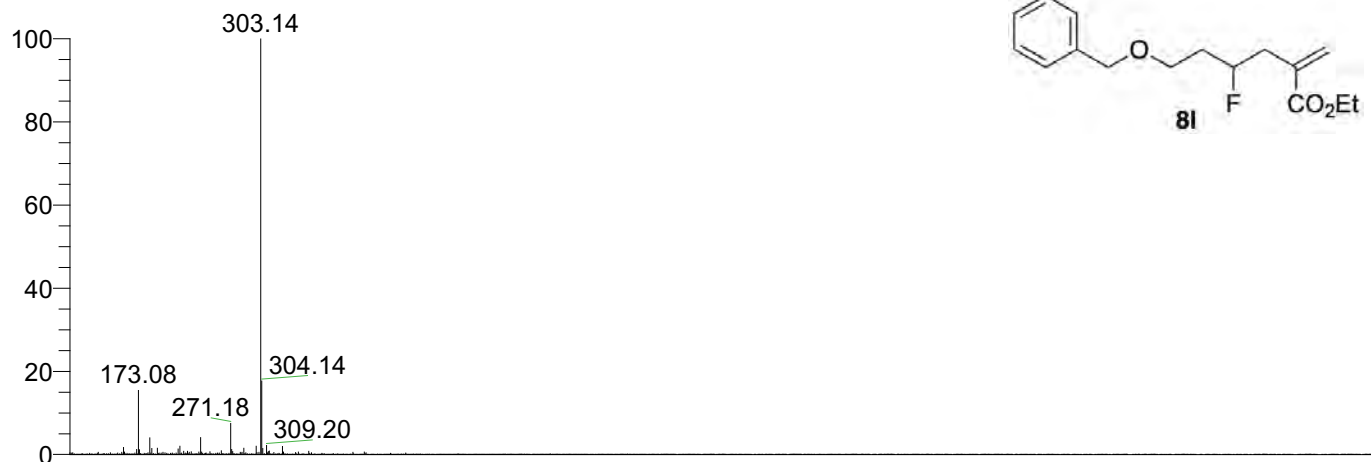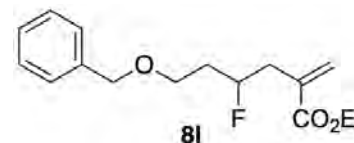

NL: 1.22E8  
BG\_231841\_8I\_pn#18  
-31 RT: 0.31-0.50  
AV: 7 T: FTMS + c  
ESI Full ms  
[100.00-1500.00]

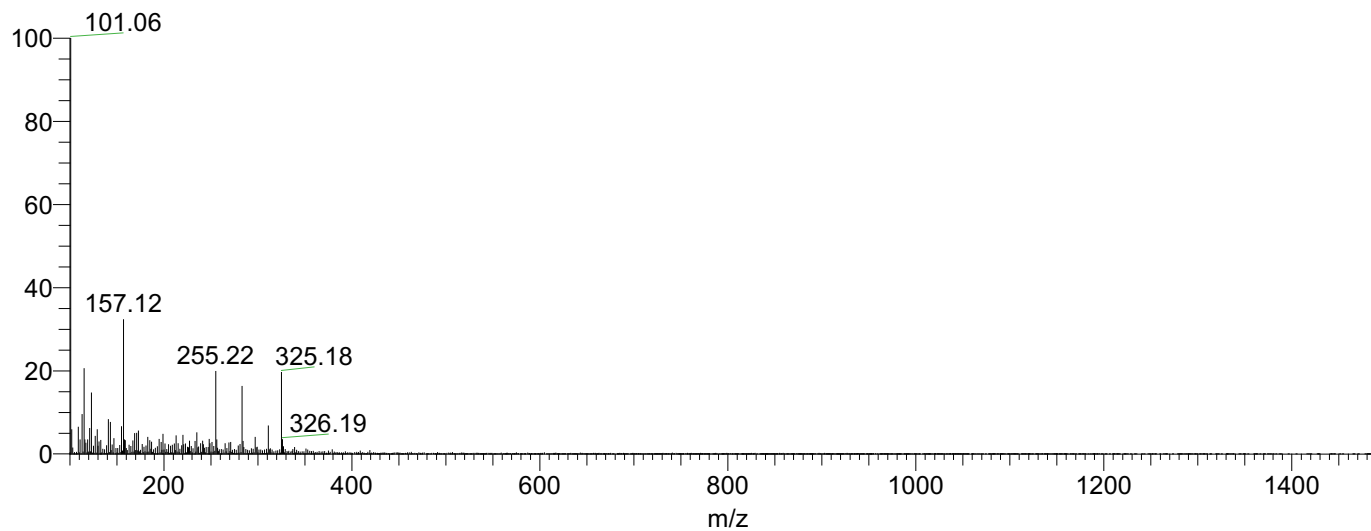

NL: 6.14E6  
BG\_231841\_8I\_pn#18  
-31 RT: 0.30-0.48  
AV: 7 T: FTMS - c ESI  
Full ms  
[100.00-1500.00]

Sample No. : C:\Xcalibur\...20231211\228\231841\_8l\_pn

Instrument : Exactive Plus

Mobile phase solvent : MeOH

Operator name : hayashi harumi

Sample solvent : CHCl3

Date : 12/28/23 10:43:44

Instrumental method : C:\Xcalibur\methods\ESI\_100ul\S60\_100ul\_mz100\_1500pn.meth

Instrumental Analysis Division, Global Facility Center, Creative Research Institution, Hokkaido University

231841\_8l\_pn #21-25 RT: 0.34-0.40 AV: 3 NL: 4.53E7

T: FTMS + p ESI Full ms [100.0000-1500.0000]

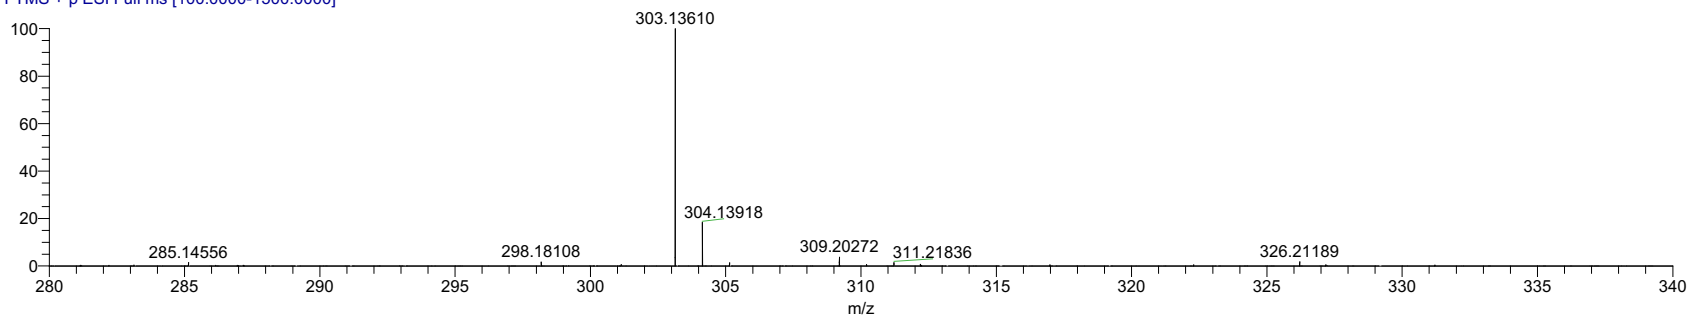

231841\_8l\_pn #25-28 RT: 0.40-0.43 AV: 2 NL: 3.39E7

T: FTMS + p ESI Full ms [100.0000-1500.0000]

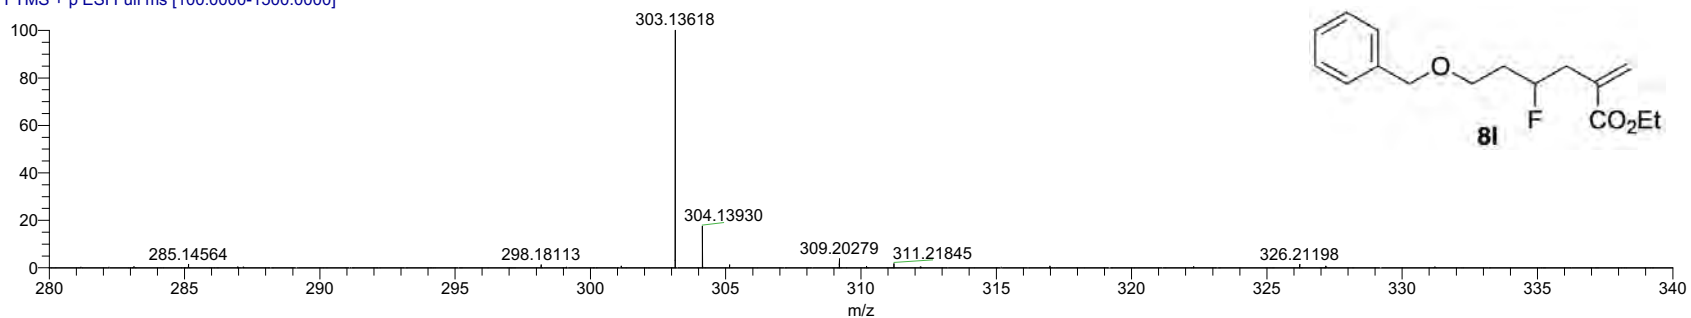

231841\_8l\_pn #28-31 RT: 0.47-0.50 AV: 2 NL: 1.25E7

T: FTMS + p ESI Full ms [100.0000-1500.0000]

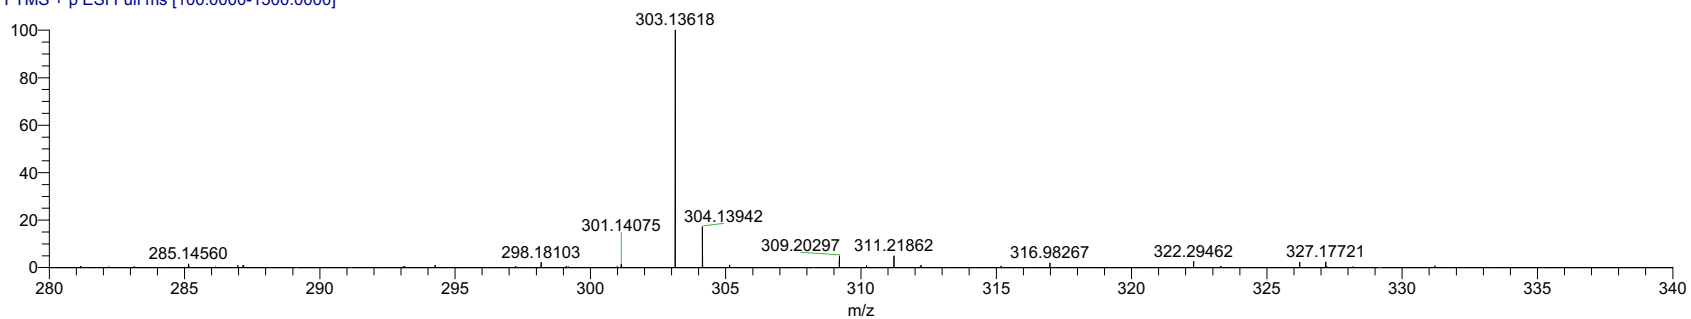



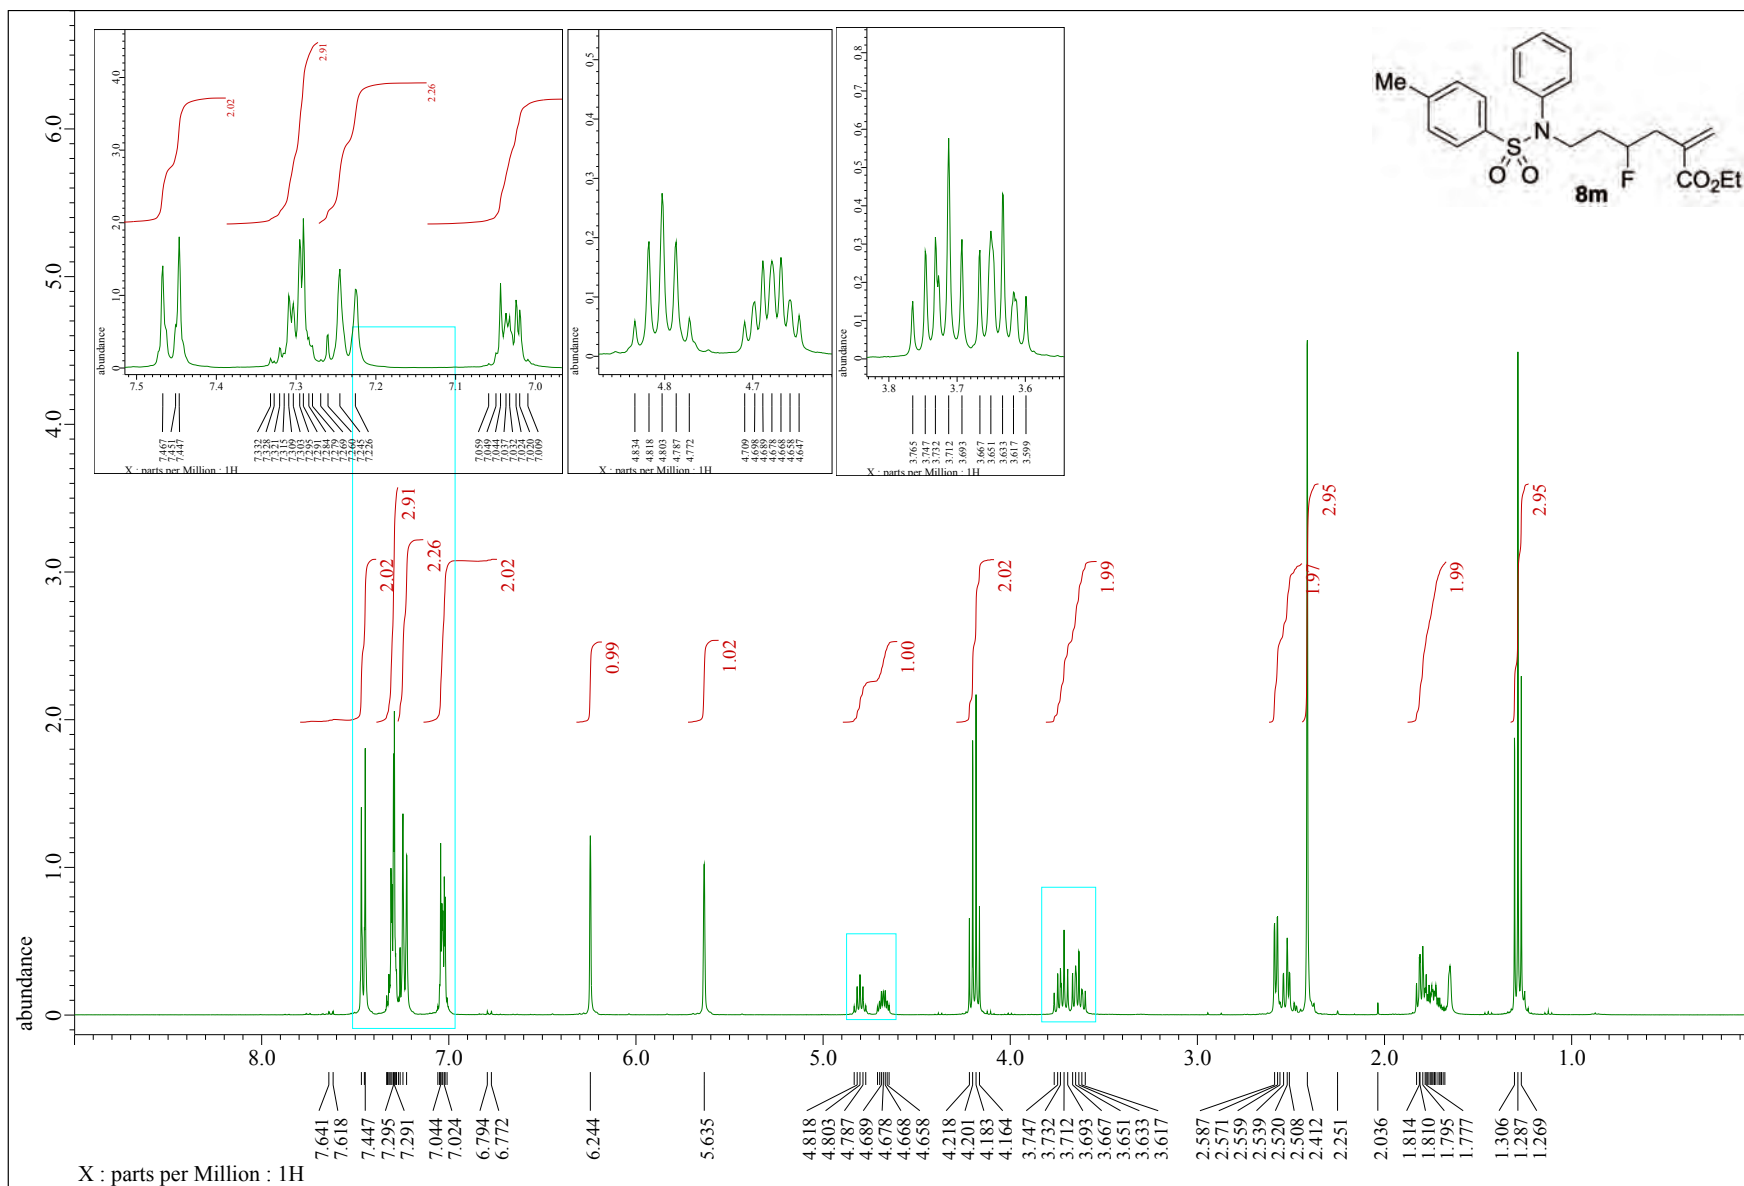

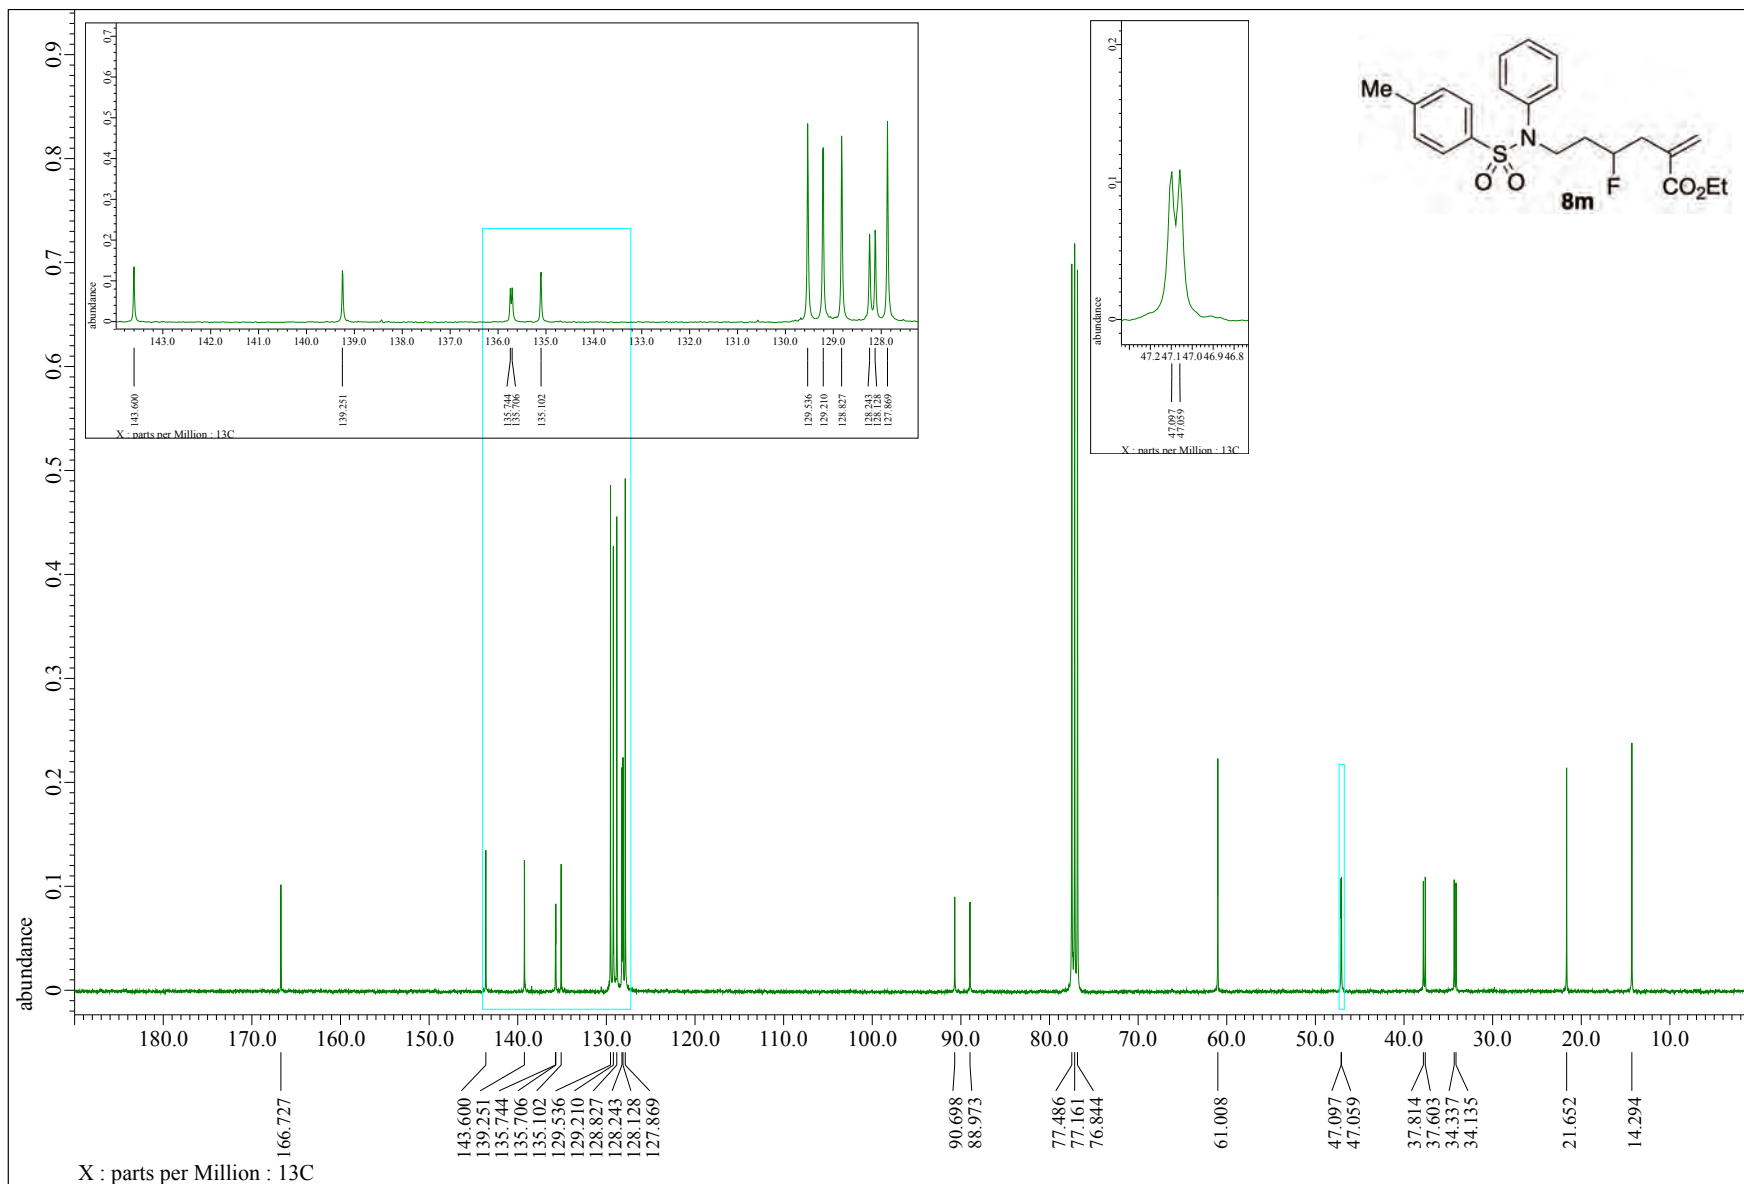

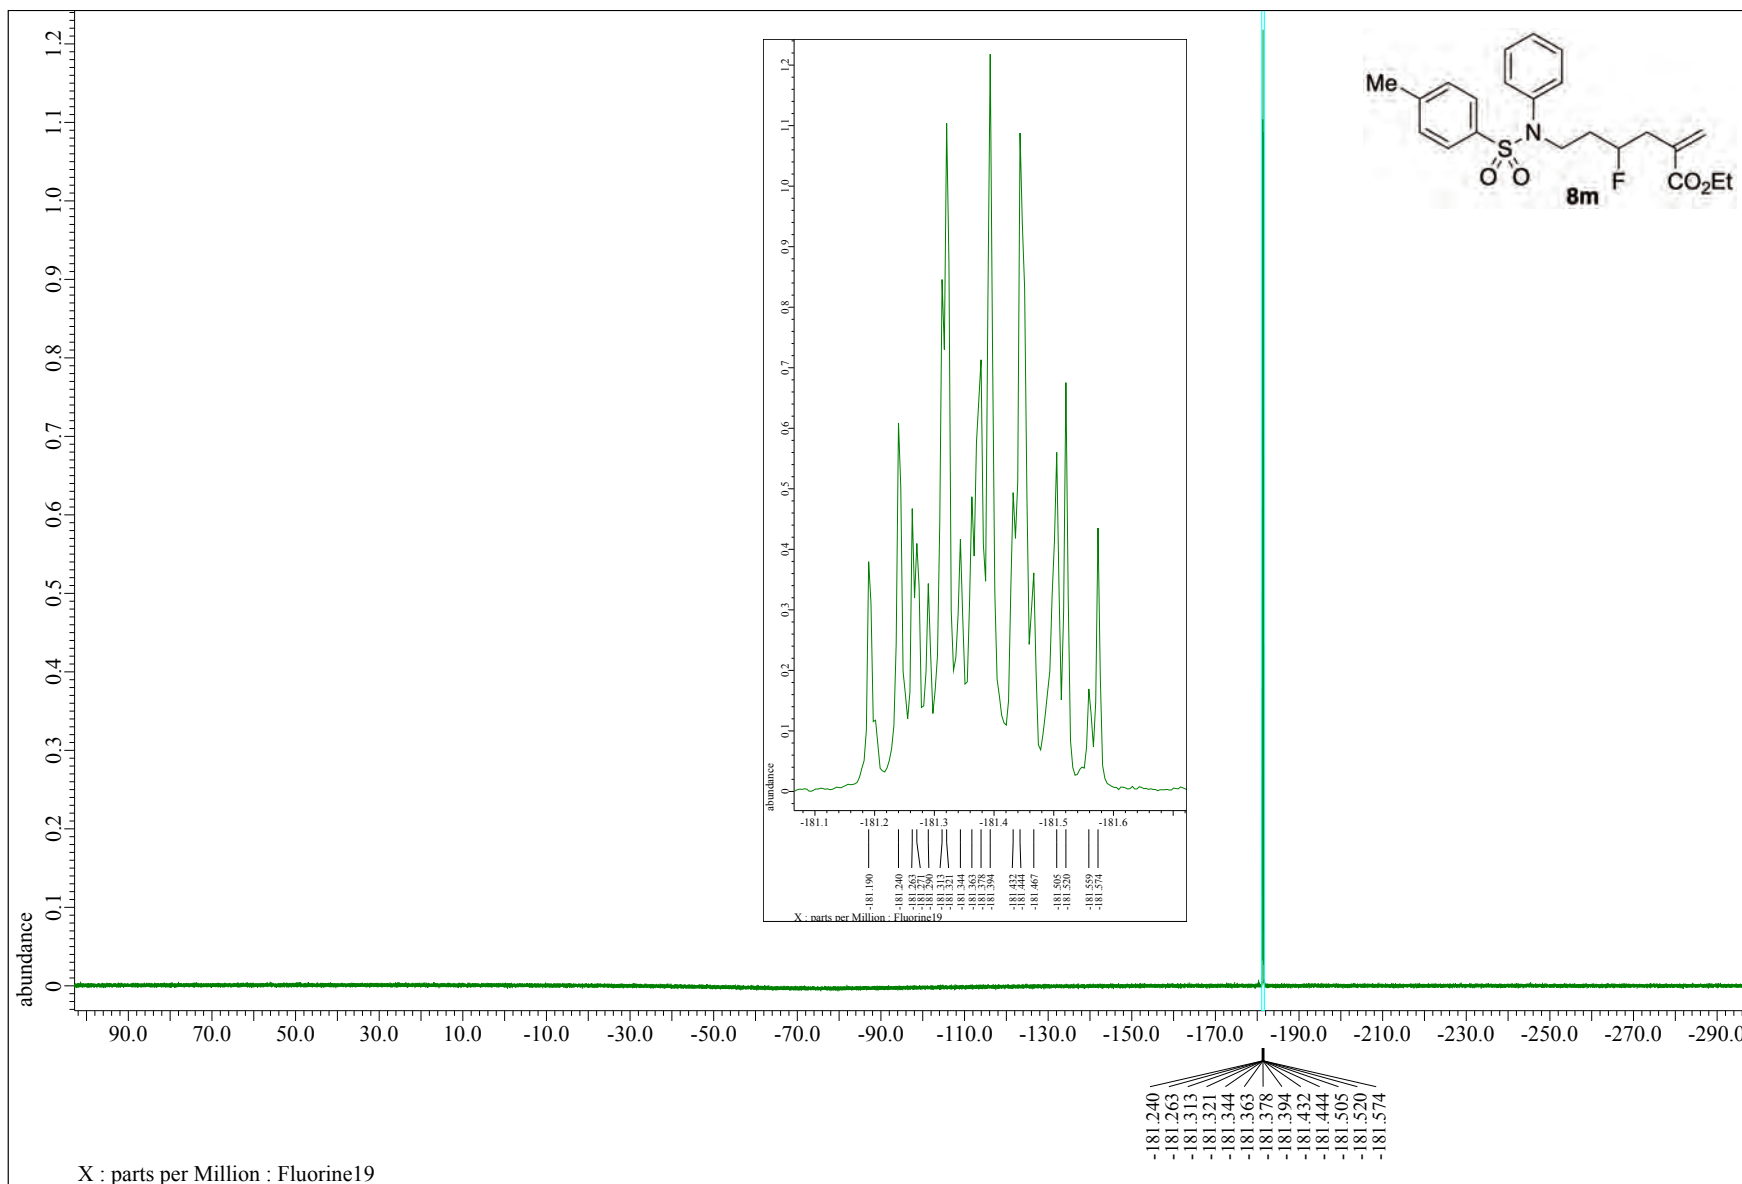

Sample No. : C:\Xcalibur\...\1228\BG\_231842\_8i \_

Instrument : Exactive Plus

Mobile phase solvent : MeOH

Operator name : hayashi harumi

Sample solvent : CHCl3

Date : 12/28/23 14:26:14

Instrumental method : C:\Xcalibur\methods\ESI\_100ul\S60\_100ul\_mz150\_2000pn.meth

Instrumental Analysis Division, Global Facility Center, Creative Research Institution, Hokkaido University

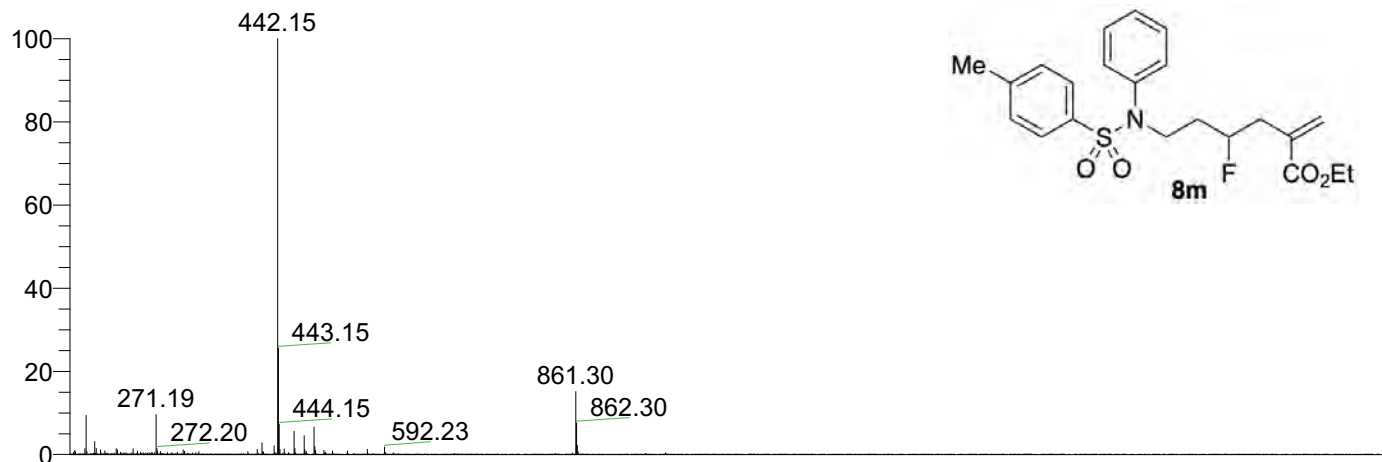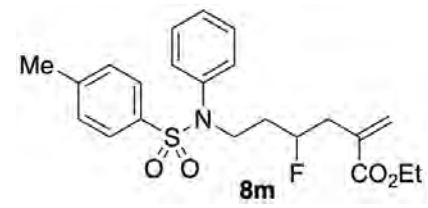

NL: 2.66E8  
BG\_231842\_8m\_pn#1  
9-31 RT: 0.31-0.49  
AV: 7 T: FTMS + c  
ESI Full ms  
[150.00-2000.00]

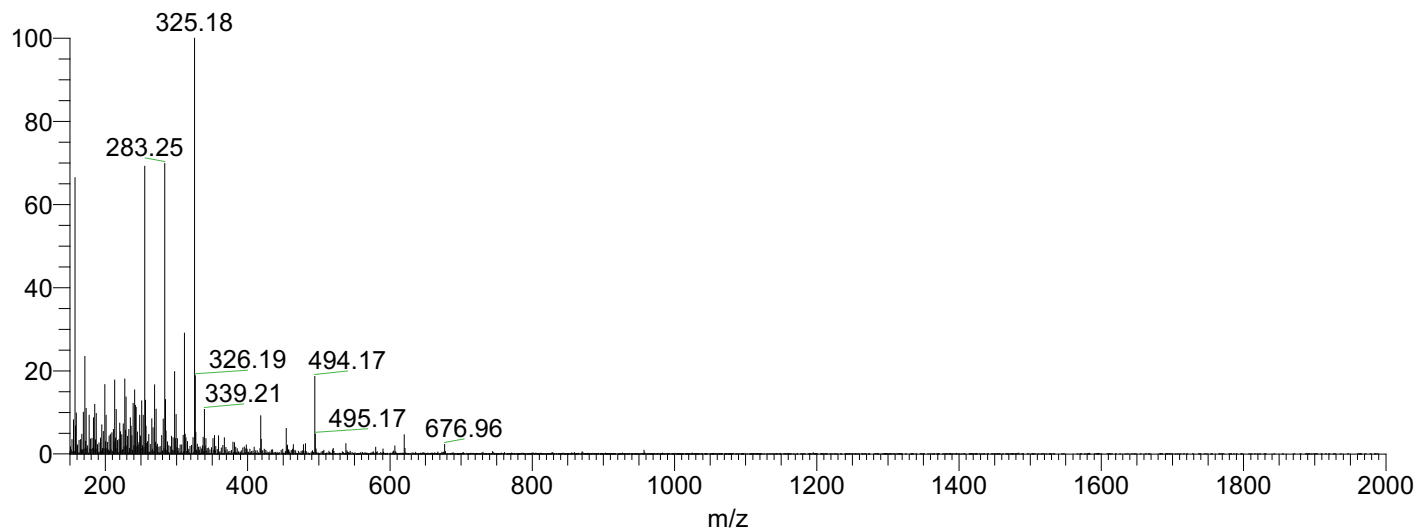

NL: 3.44E6  
BG\_231842\_8m\_pn#1  
8-31 RT: 0.30-0.48  
AV: 7 T: FTMS - c  
Full ms  
[150.00-2000.00]

Sample No. : C:\Xcalibur\...202312\11228\231842\_8m\_pn

Instrument : Exactive Plus

Mobile phase solvent : MeOH

Operator name : hayashi harumi

Sample solvent : CHCl3

Date : 12/28/23 10:48:44

Instrumental method : C:\Xcalibur\methods\ESI\_100ul\S60\_100ul\_mz150\_2000pn.meth

Instrumental Analysis Division, Global Facility Center, Creative Research Institution, Hokkaido University

231842\_8m\_pn #22-25 RT: 0.37-0.40 AV: 2 NL: 1.12E8

T: FTMS + p ESI Full ms [150.0000-2000.0000]

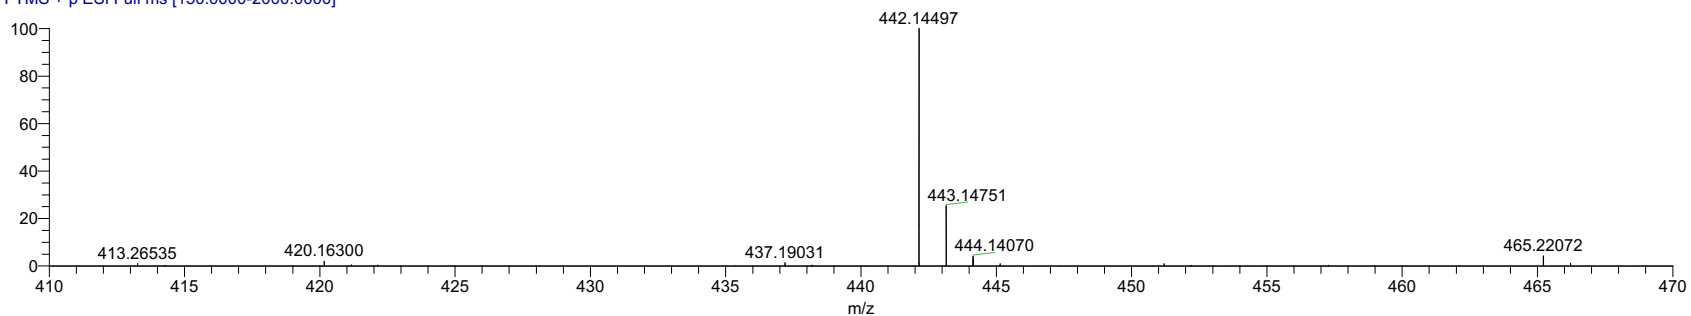

231842\_8m\_pn #26 RT: 0.43 AV: 1 NL: 7.16E7

T: FTMS + p ESI Full ms [150.0000-2000.0000]

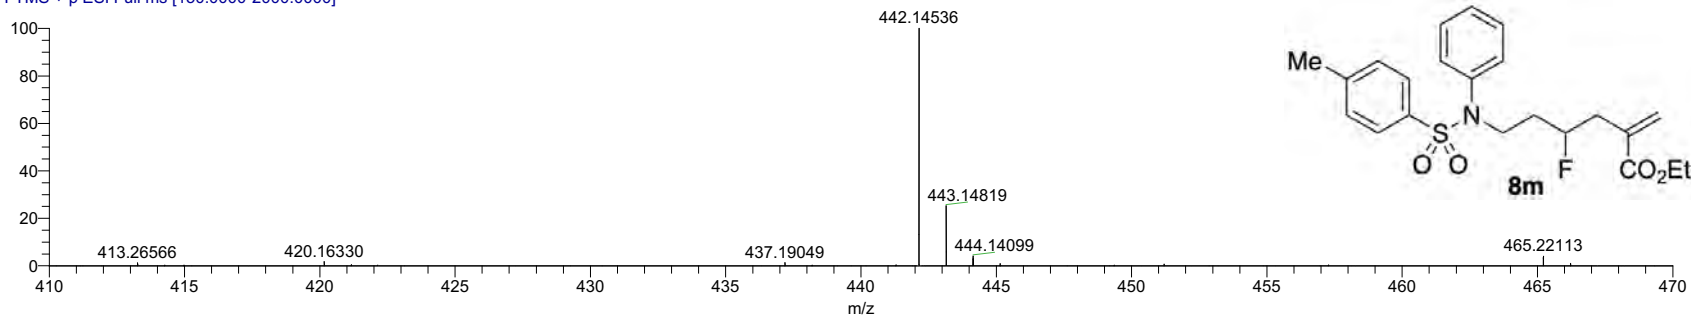

231842\_8m\_pn #29-32 RT: 0.46-0.49 AV: 2 NL: 4.63E7

T: FTMS + p ESI Full ms [150.0000-2000.0000]

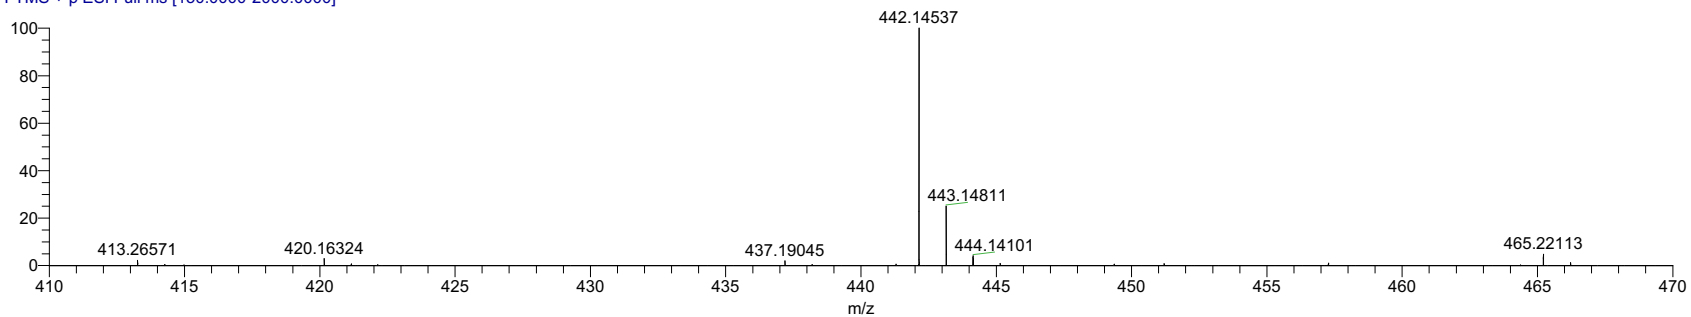

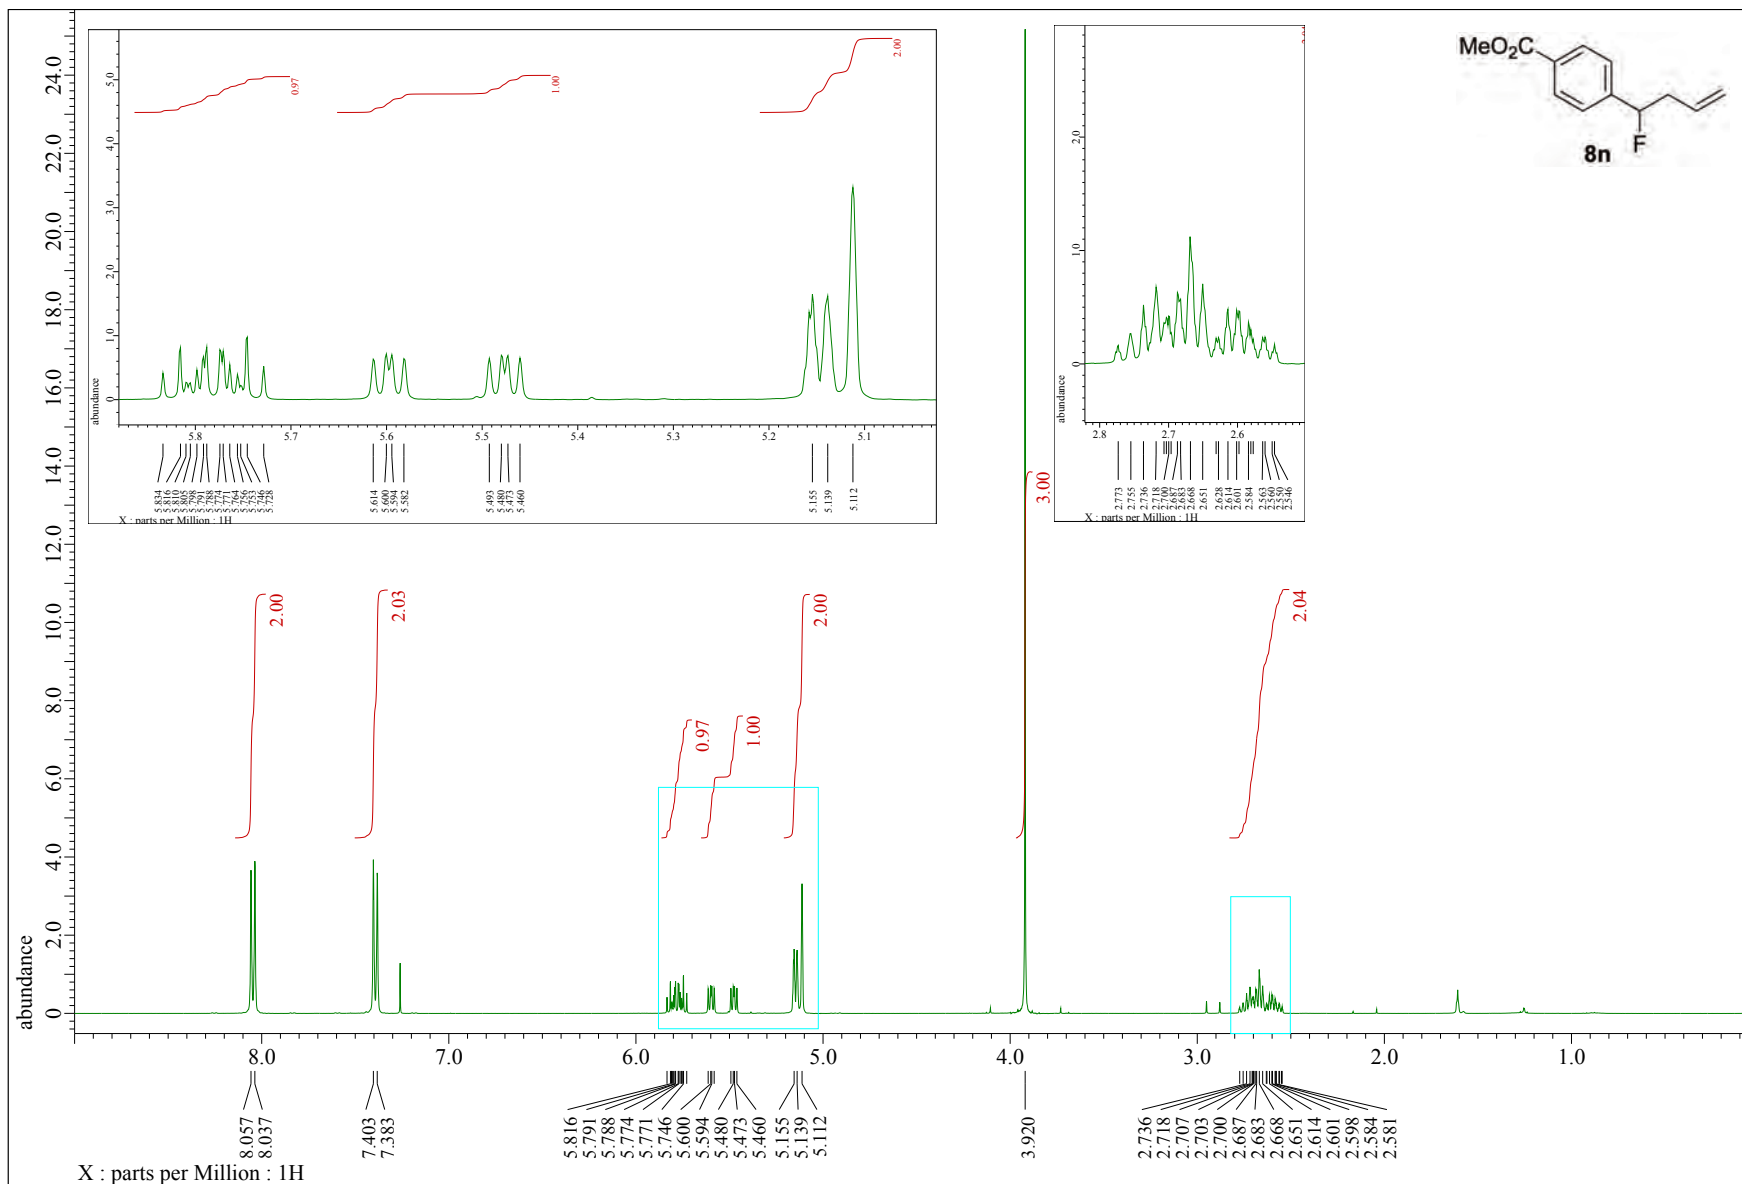

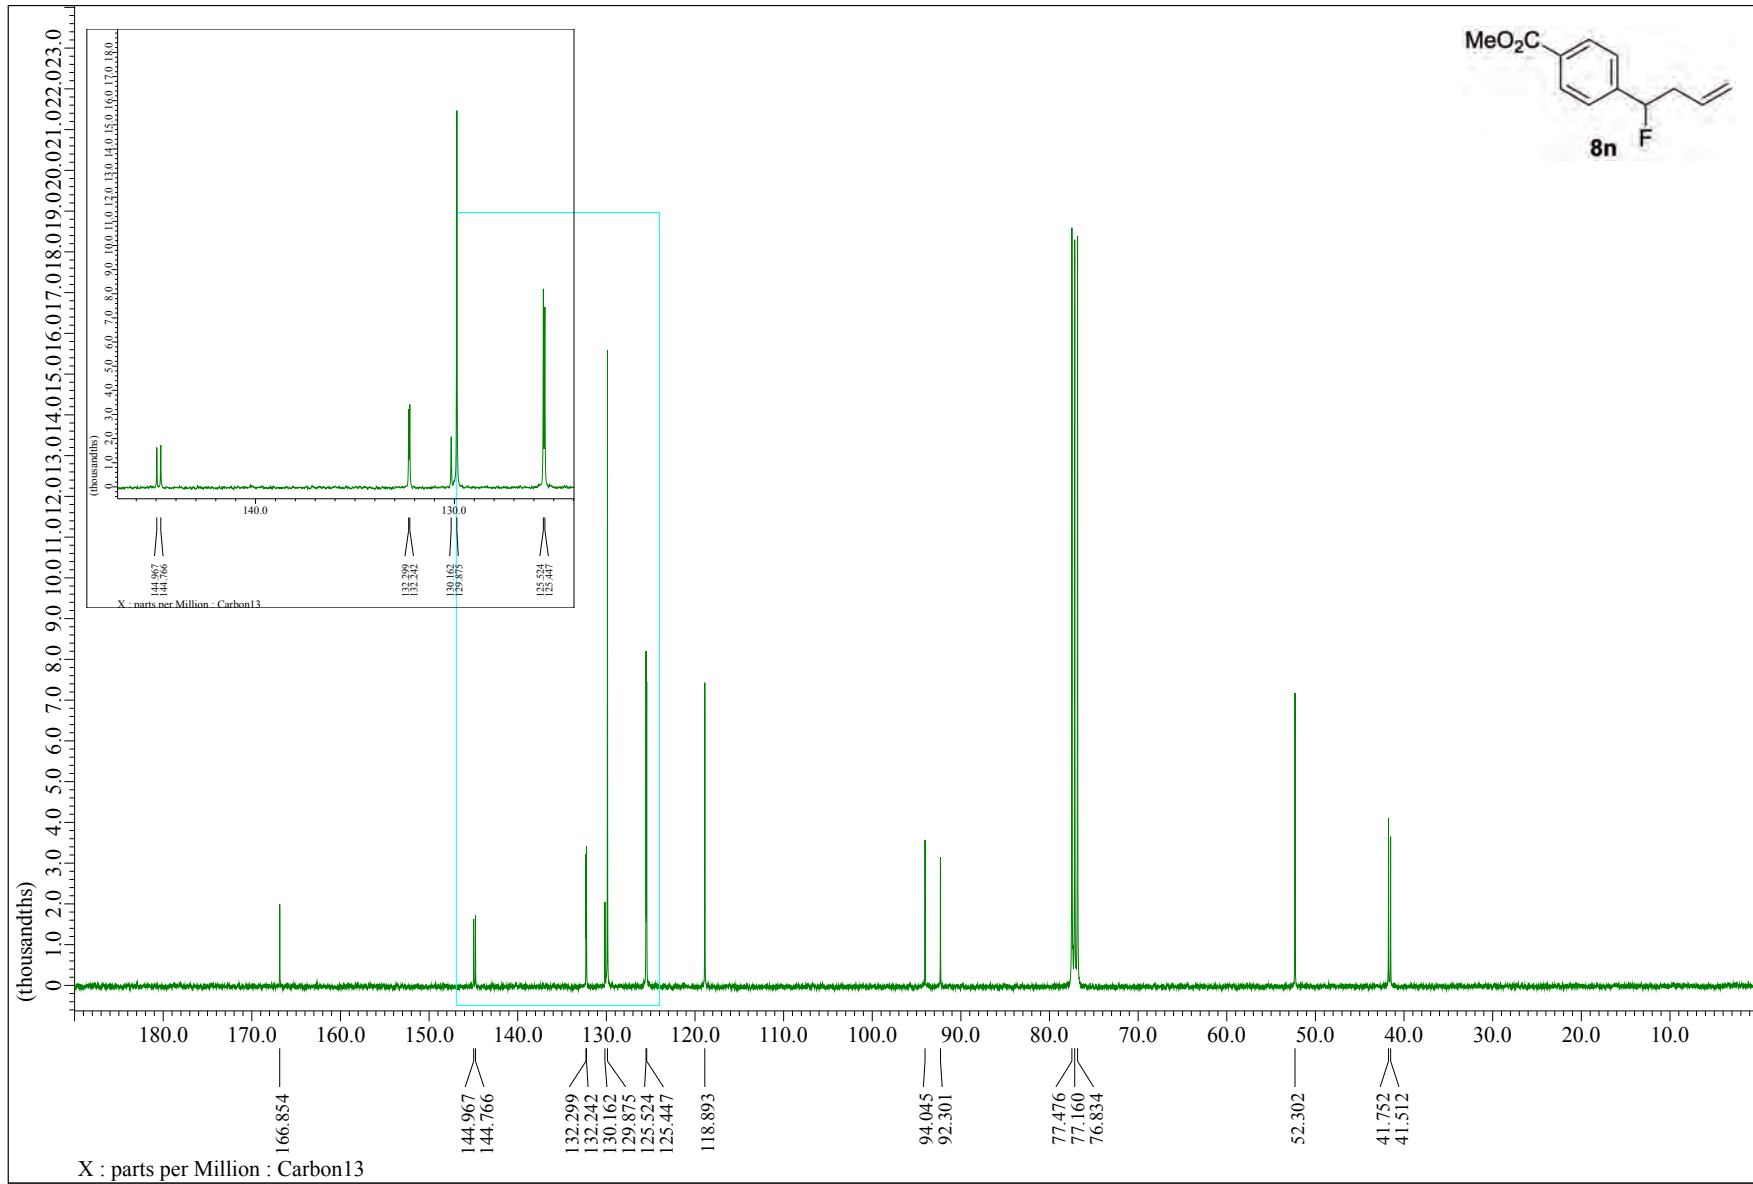

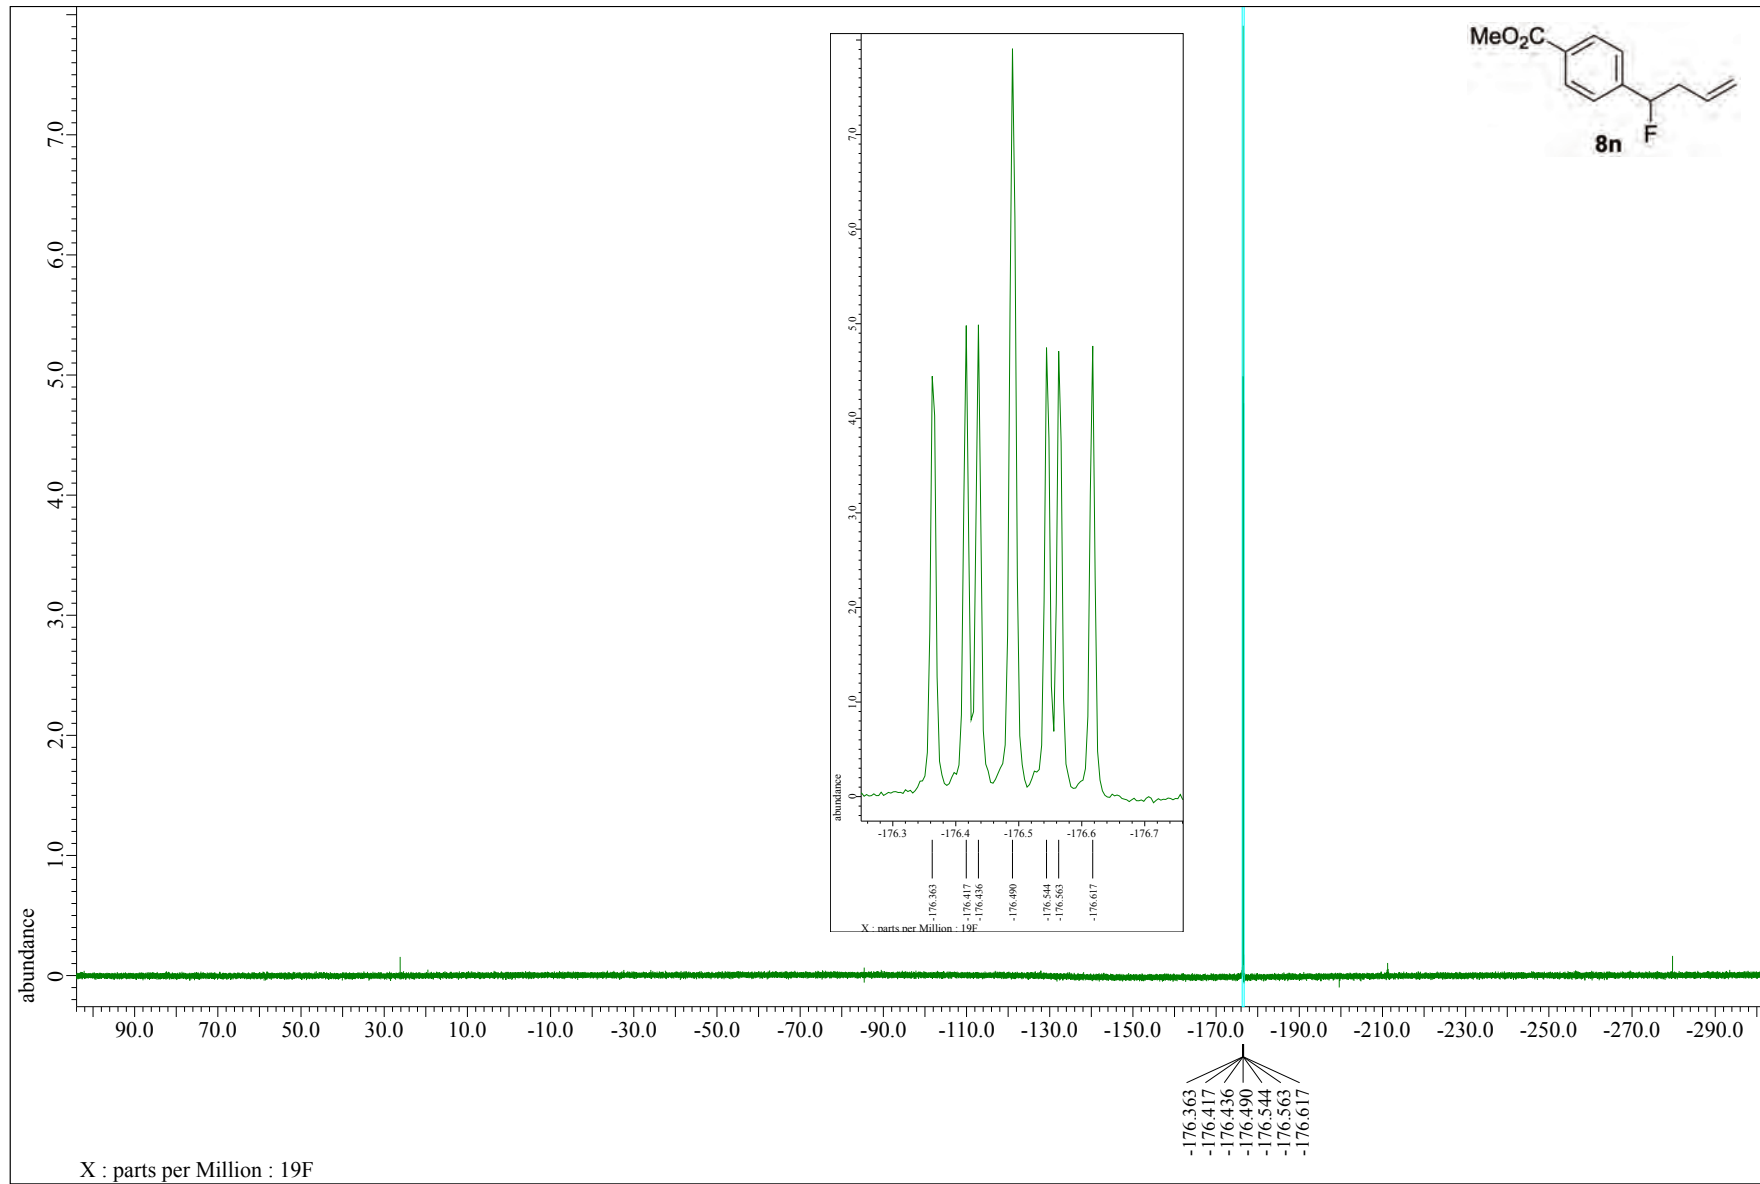



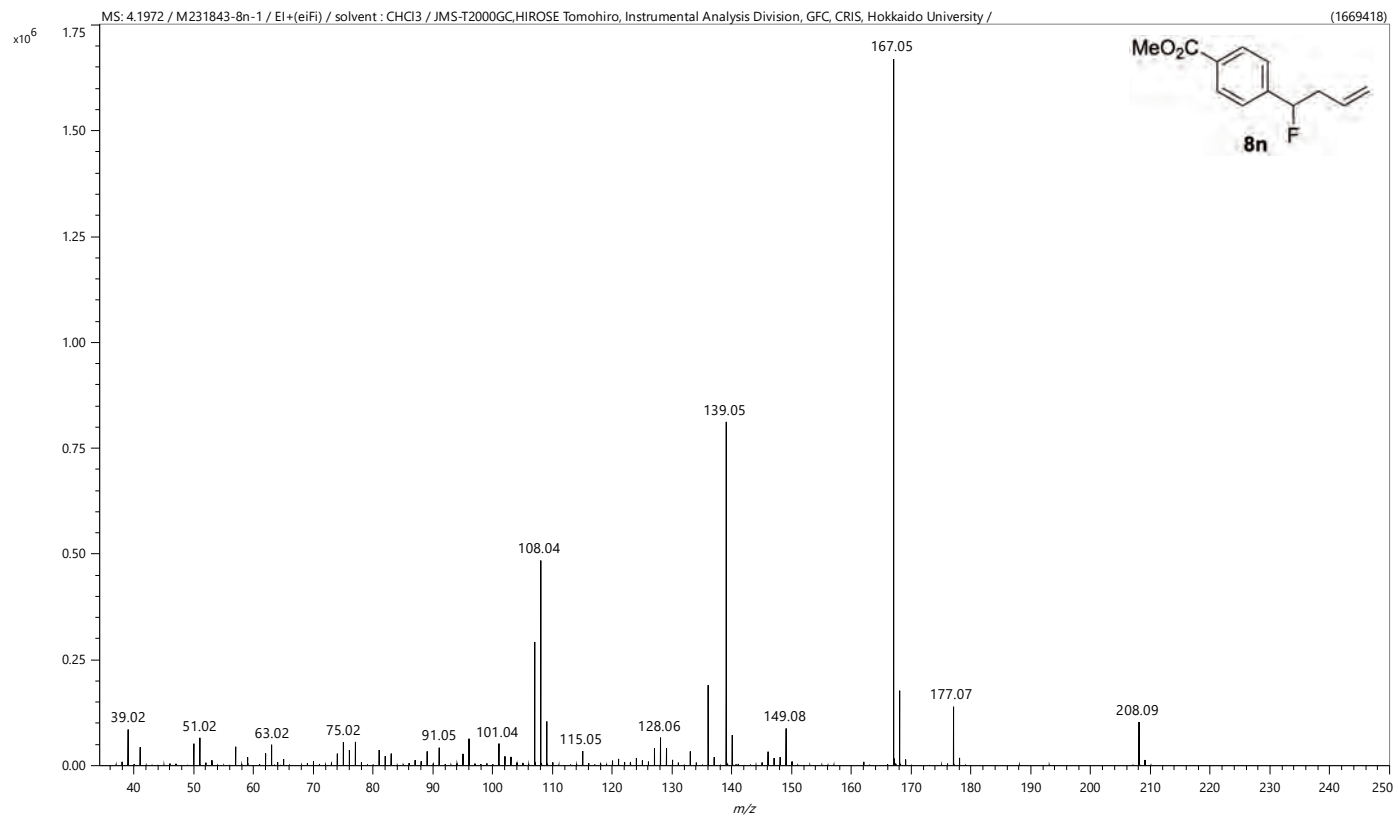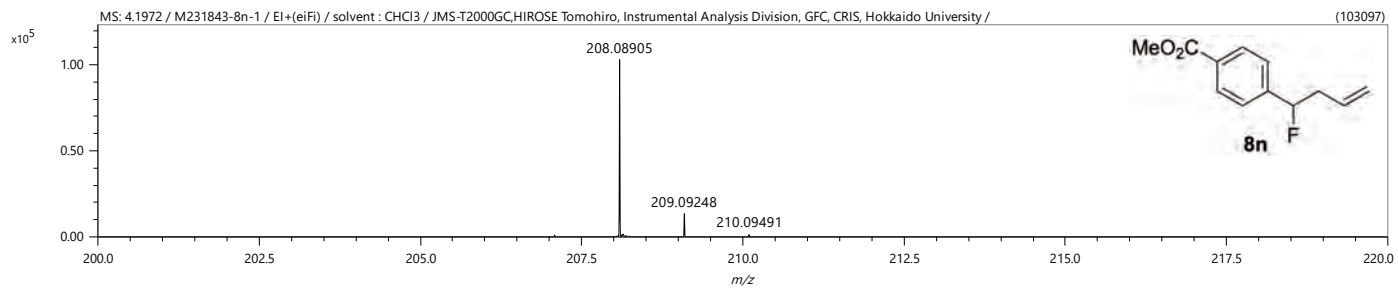

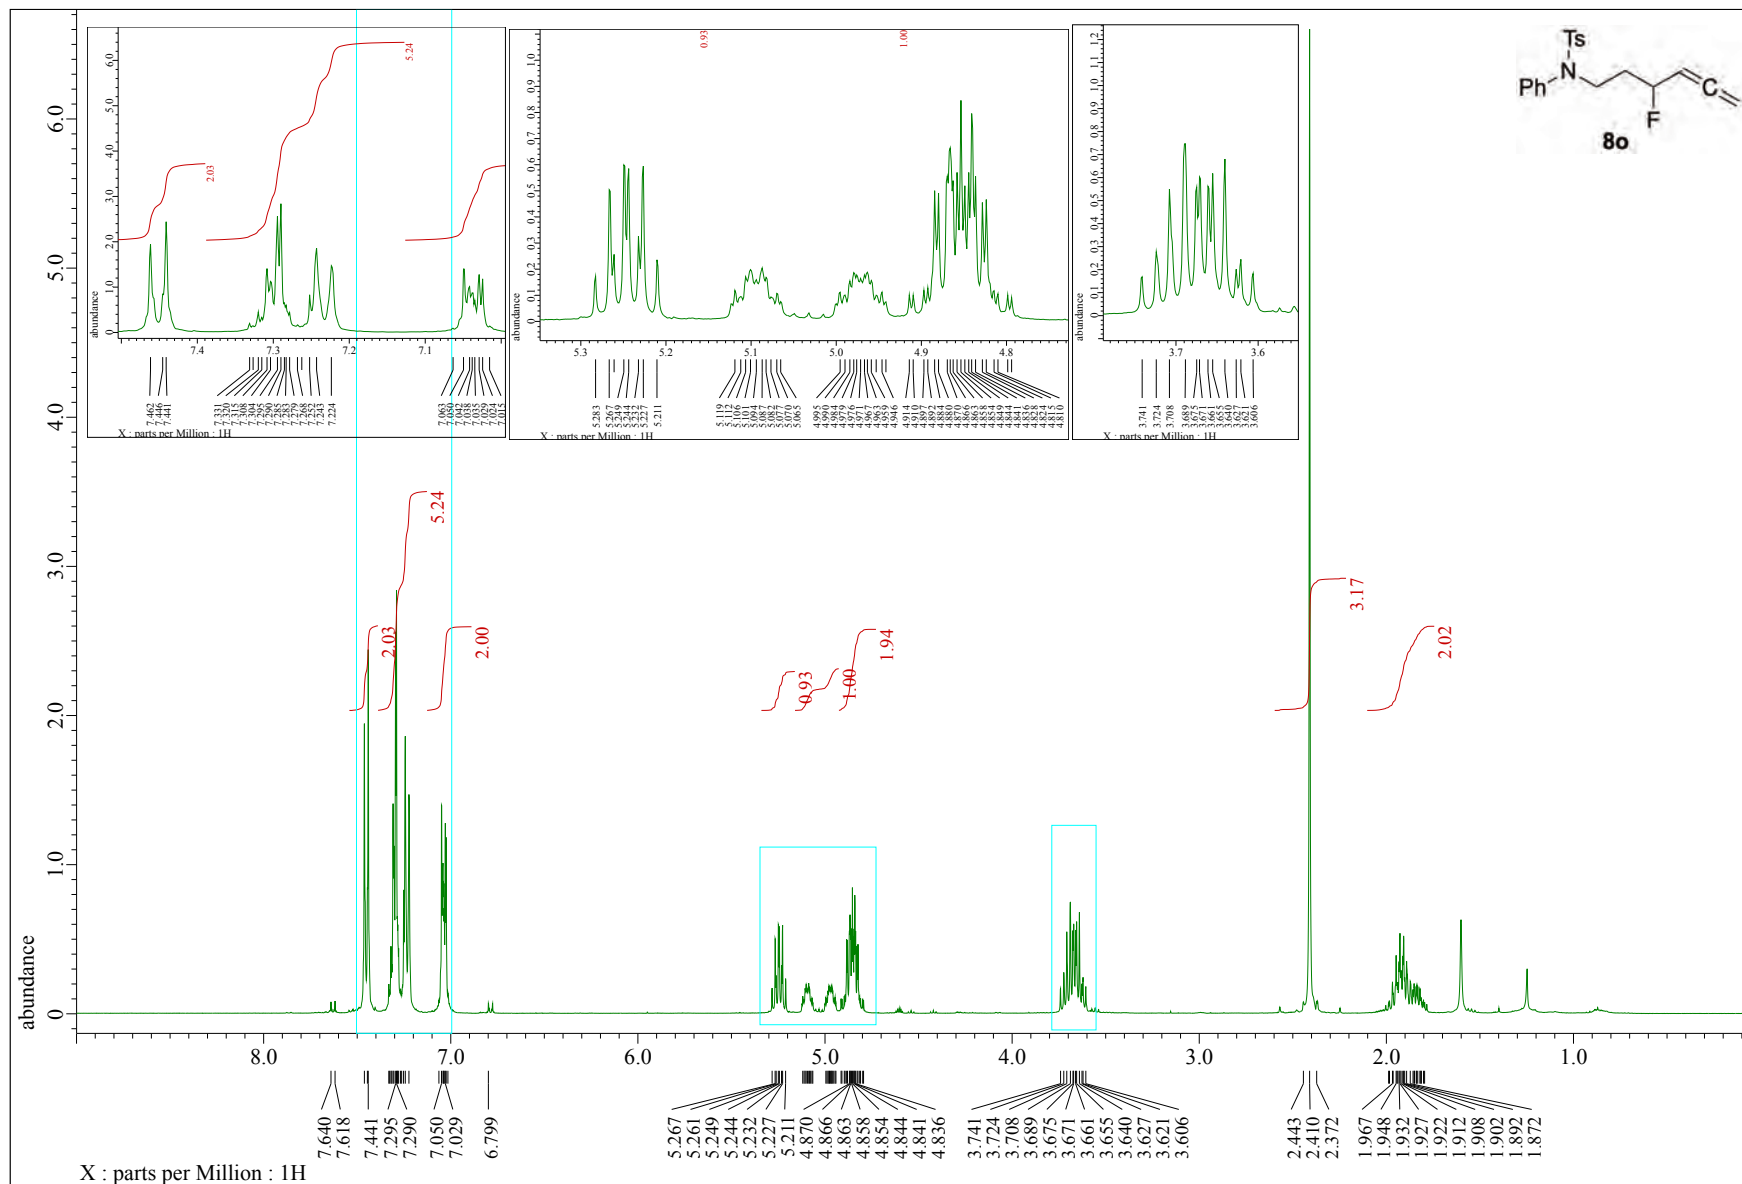

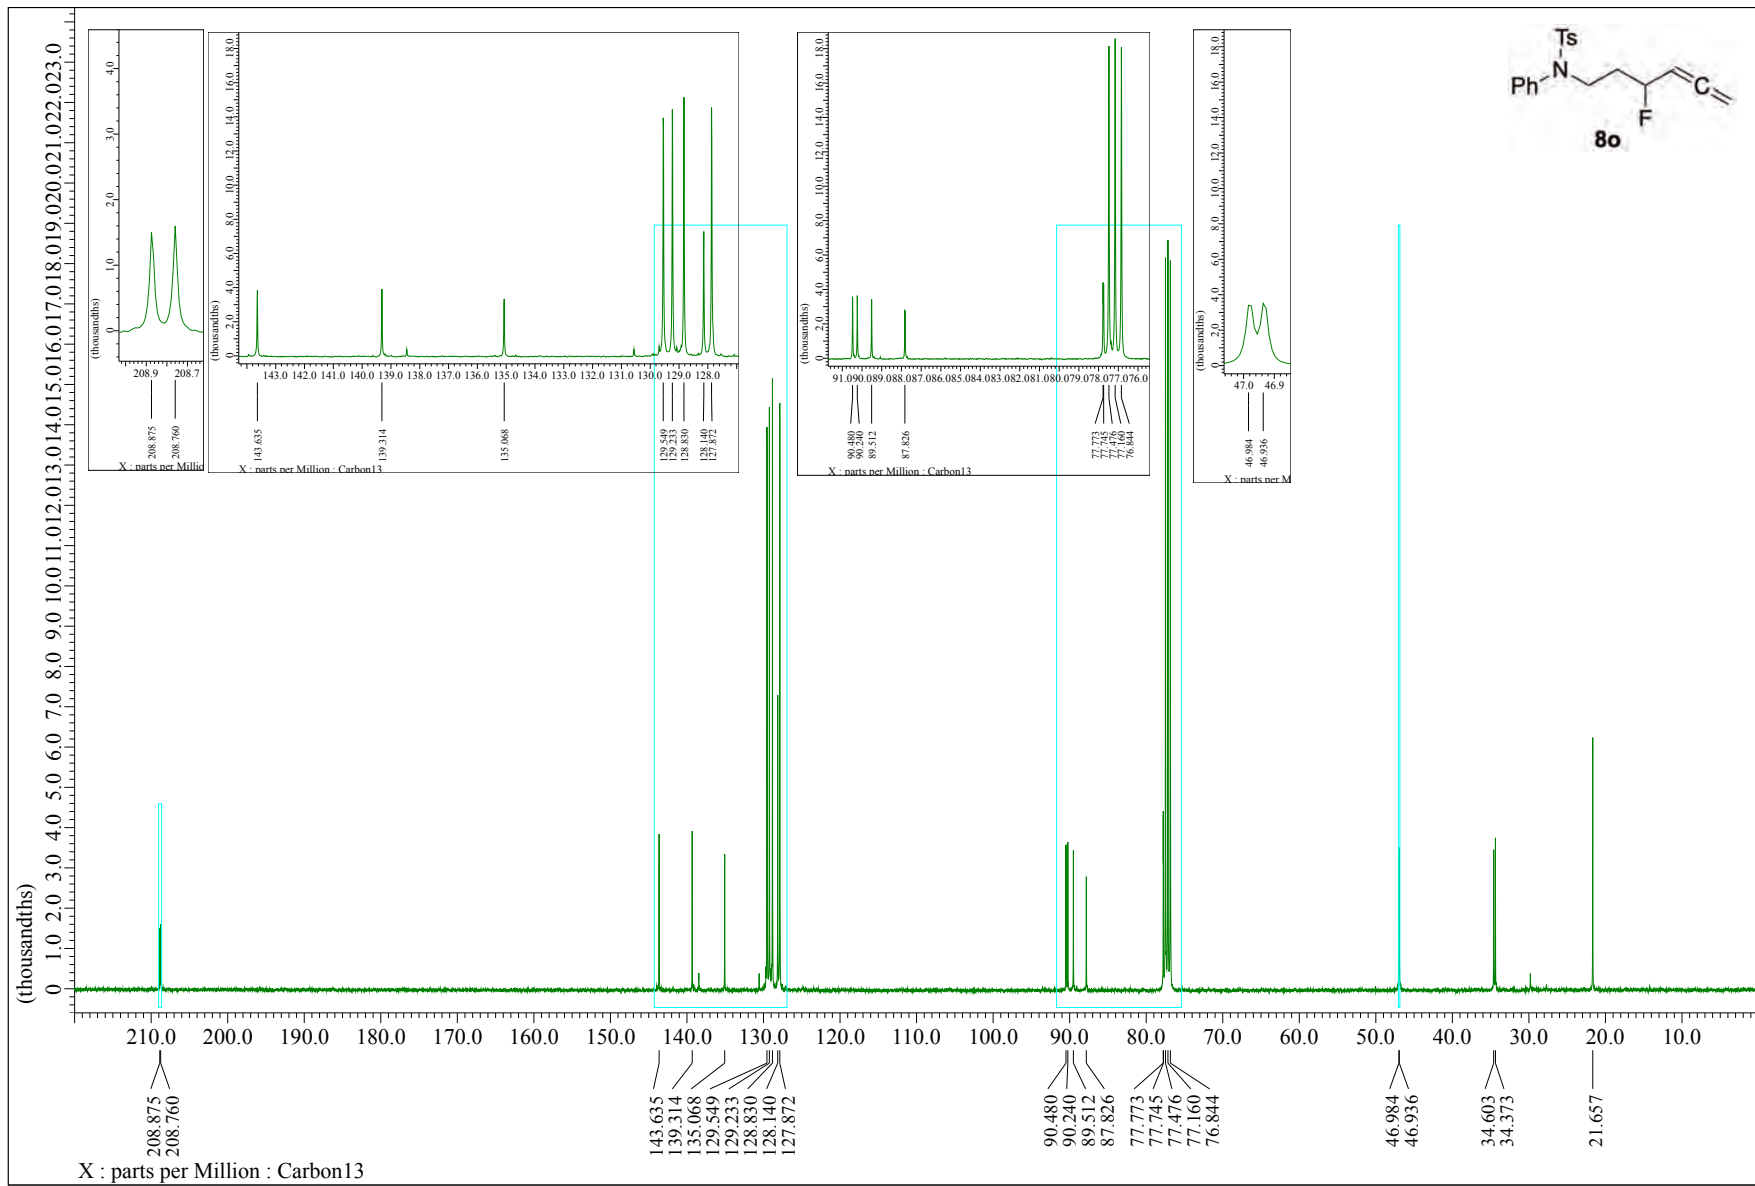

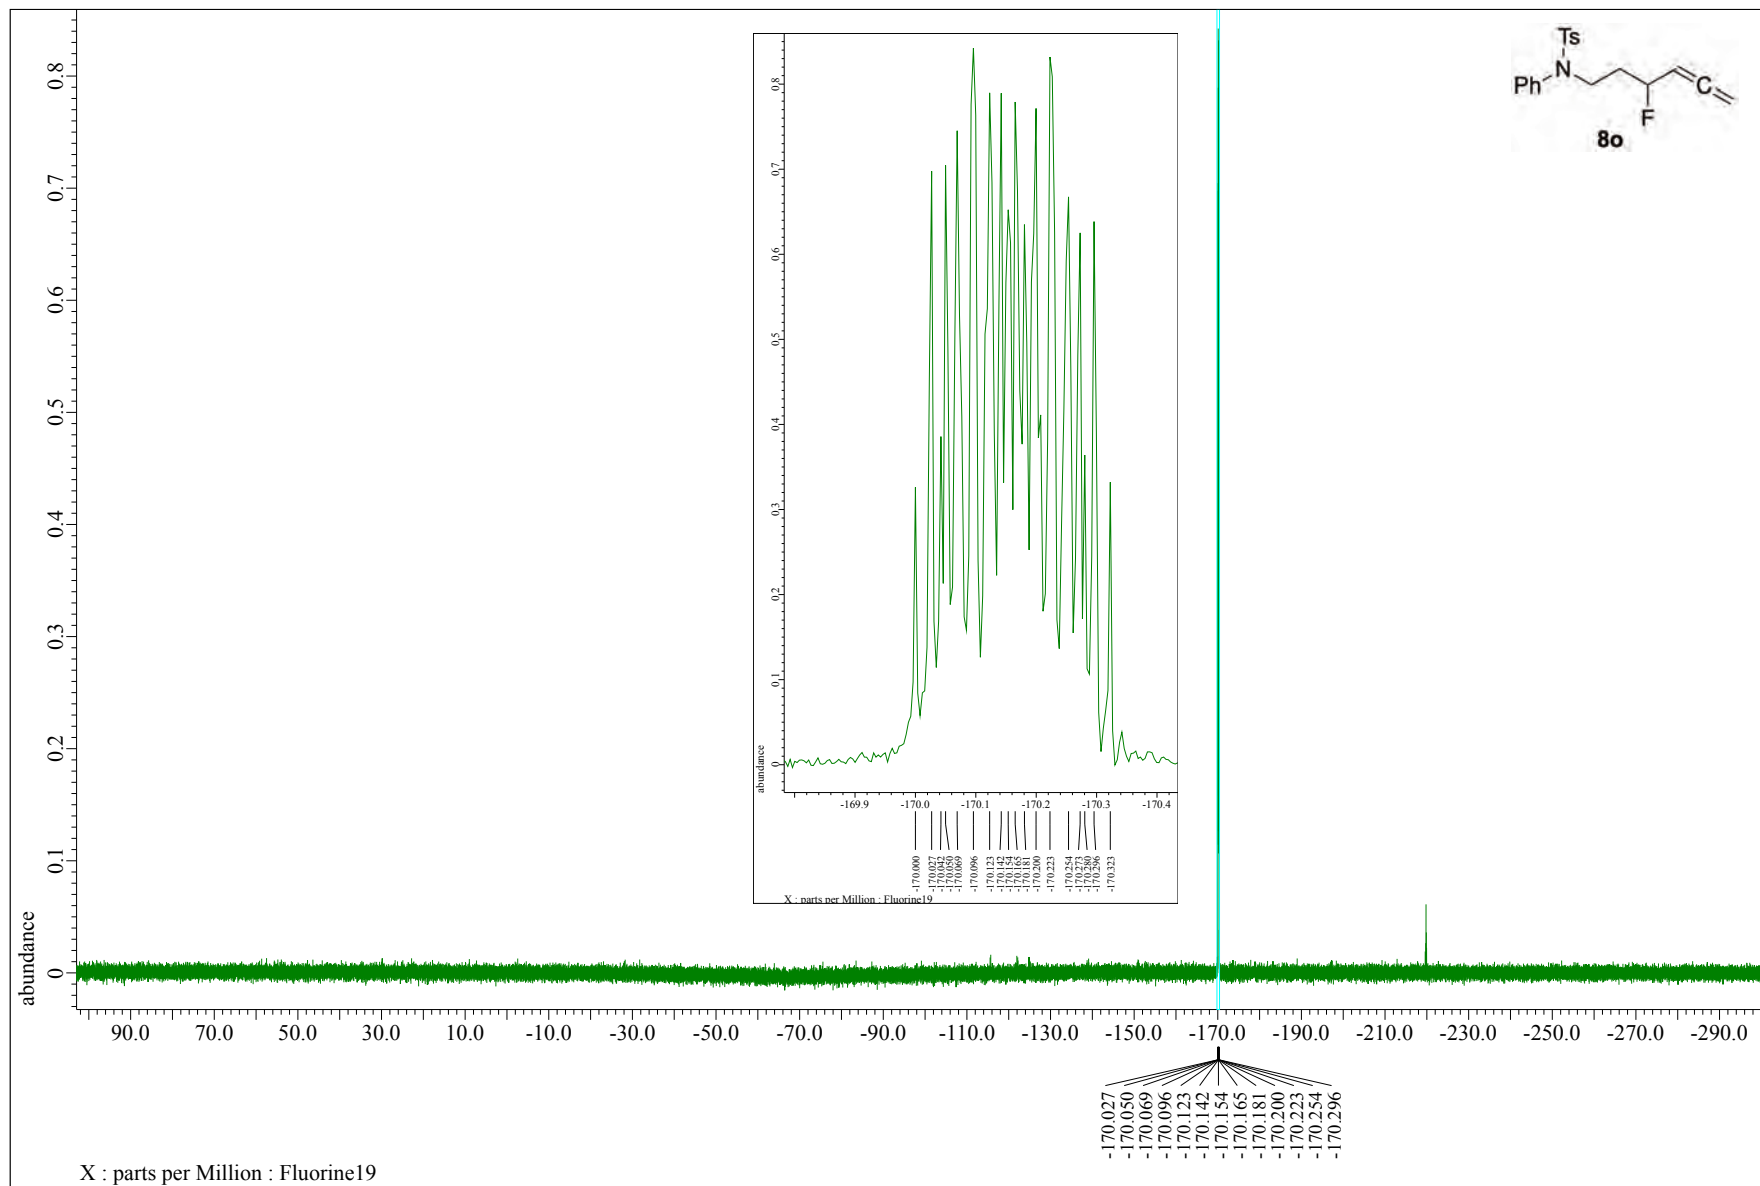

Sample No. : C:\Xcalibur\...1228\BG\_231844\_8r\_

Instrument : Exactive Plus

Mobile phase solvent : MeOH

Operator name : hayashi harumi

Sample solvent : CHCl3

Date : 12/28/23 14:26:38

Instrumental method : C:\Xcalibur\methods\ESI\_100ul\S60\_100ul\_mz150\_2000pn.meth

Instrumental Analysis Division, Global Facility Center, Creative Research Institution, Hokkaido University

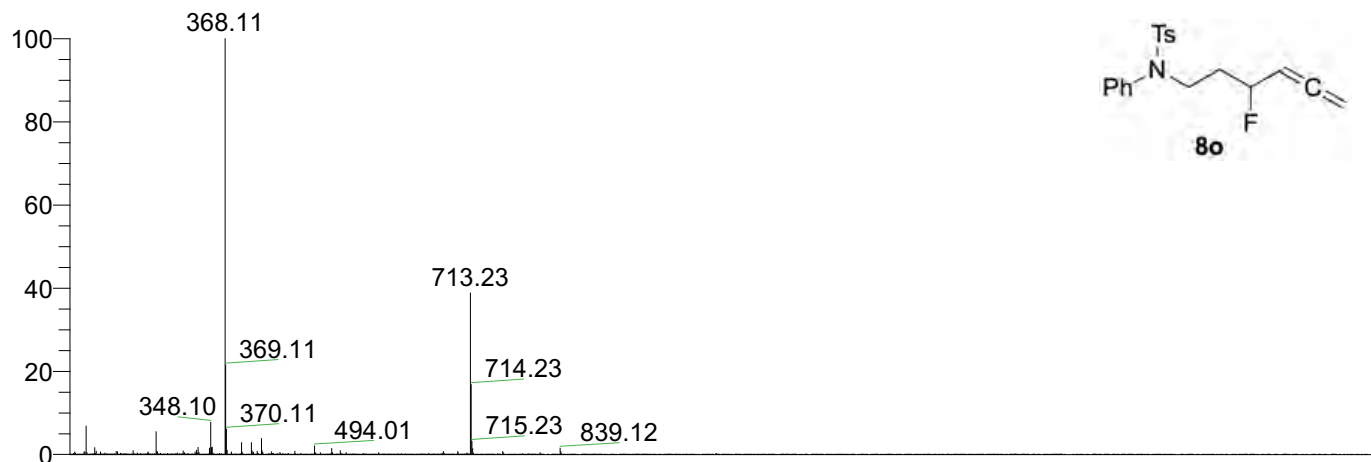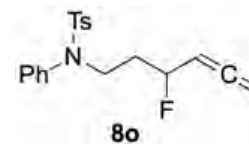

NL: 3.13E8  
BG\_231844\_8o\_pn#1  
9-32 RT: 0.31-0.49  
AV: 7 T: FTMS + c  
ESI Full ms  
[150.00-2000.00]

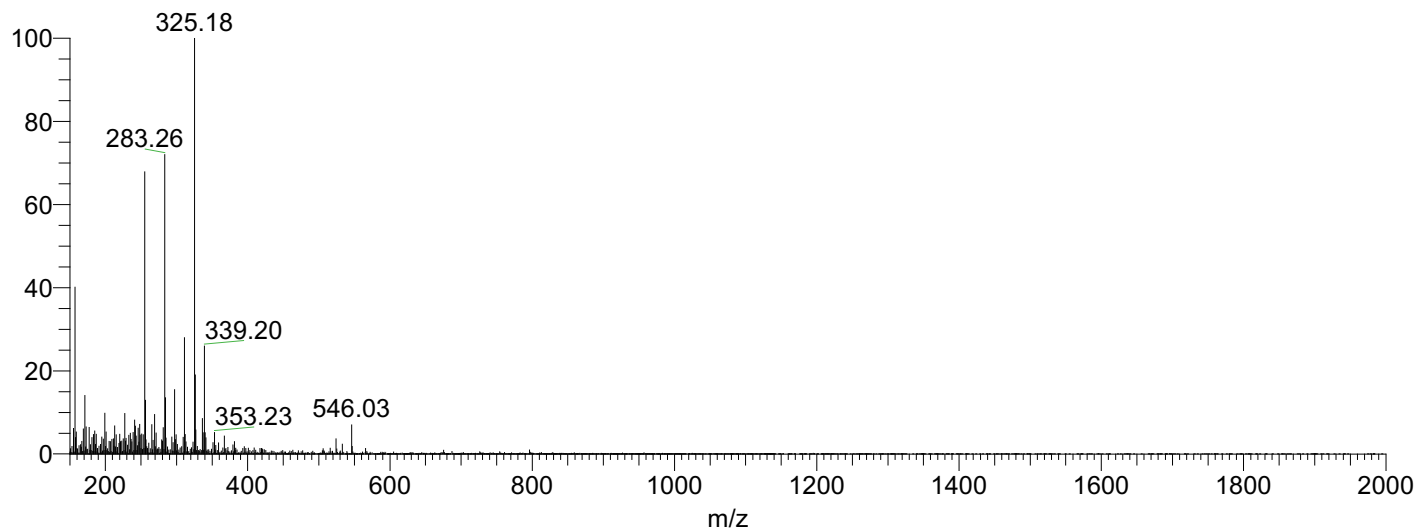

NL: 6.64E6  
BG\_231844\_8o\_pn#1  
8-32 RT: 0.29-0.50  
AV: 8 T: FTMS - c ESI  
Full ms  
[150.00-2000.00]

Sample No. : C:\Xcalibur\...20231211\228\231844\_8o\_pn

Instrument : Exactive Plus

Mobile phase solvent : MeOH

Operator name : hayashi harumi

Sample solvent : CHCl3

Date : 12/28/23 11:01:43

Instrumental method : C:\Xcalibur\methods\ESI\_100ul\S60\_100ul\_mz150\_2000pn.meth

Instrumental Analysis Division, Global Facility Center, Creative Research Institution, Hokkaido University

231844\_8o\_pn#22-25 RT: 0.37-0.40 AV: 2 NL: 1.03E8

T: FTMS + p ESI Full ms [150.0000-2000.0000]

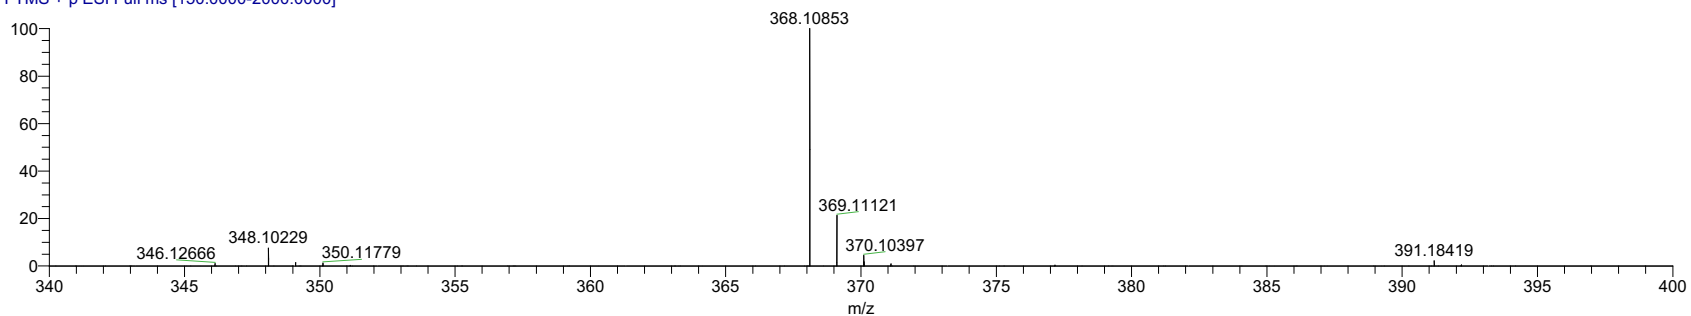

231844\_8o\_pn#26-29 RT: 0.43-0.46 AV: 2 NL: 7.62E7

T: FTMS + p ESI Full ms [150.0000-2000.0000]

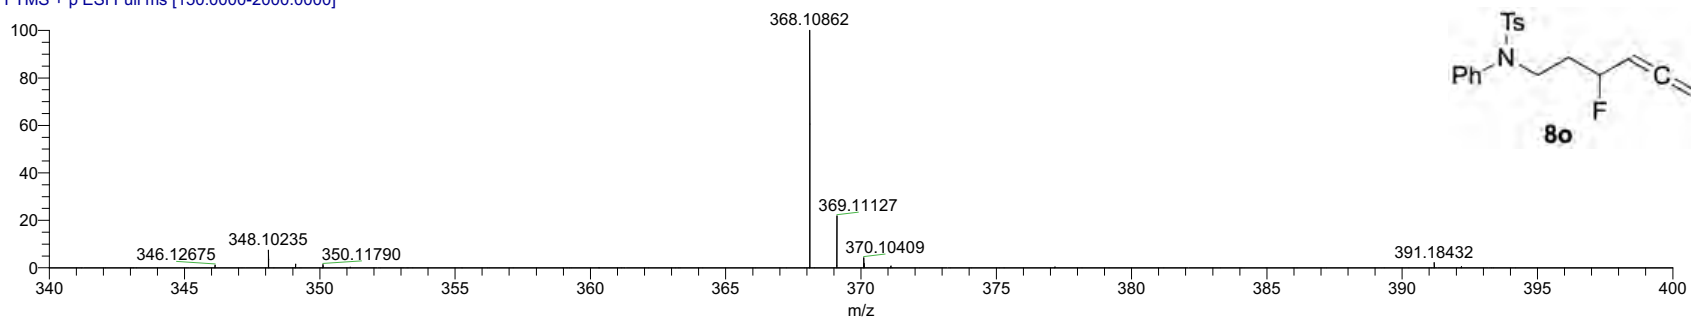

231844\_8o\_pn#30-33 RT: 0.49-0.52 AV: 2 NL: 3.95E7

T: FTMS + p ESI Full ms [150.0000-2000.0000]

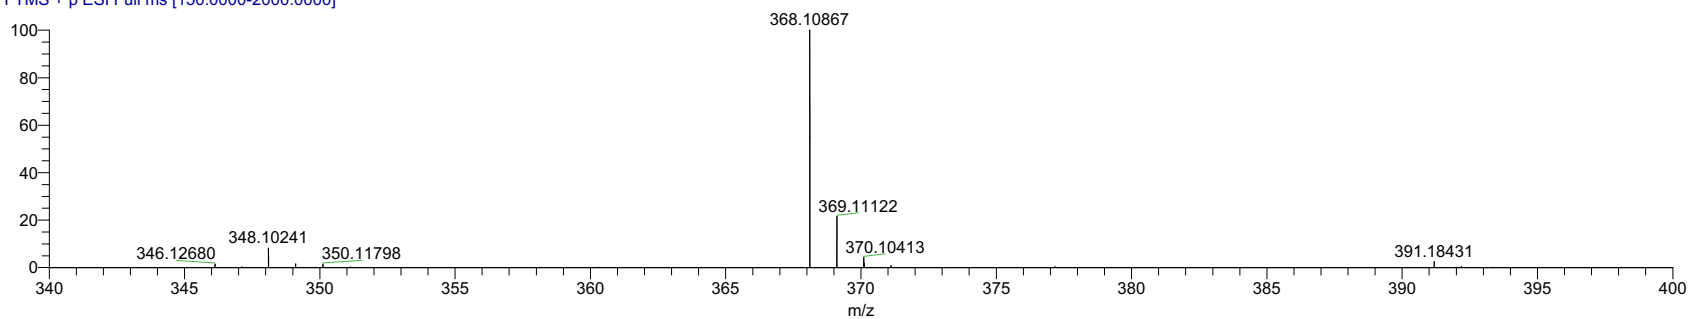

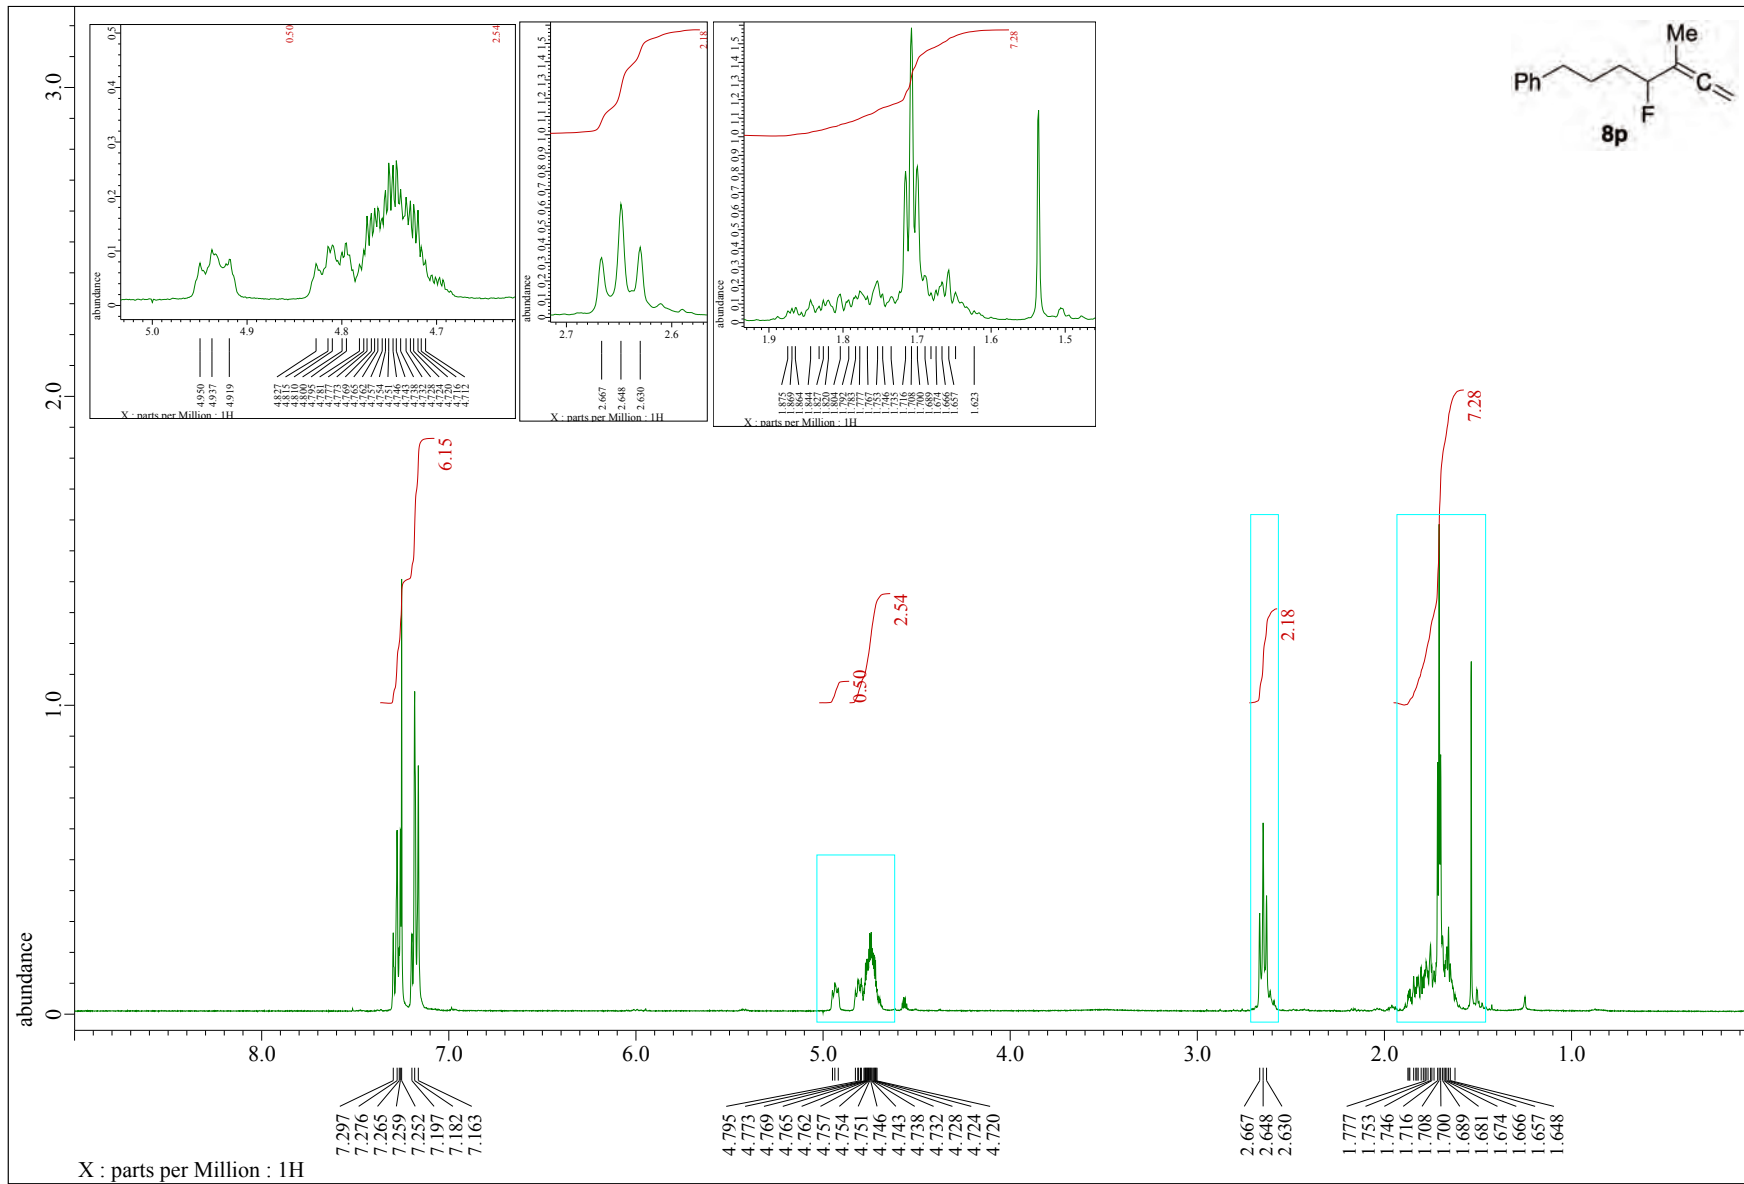

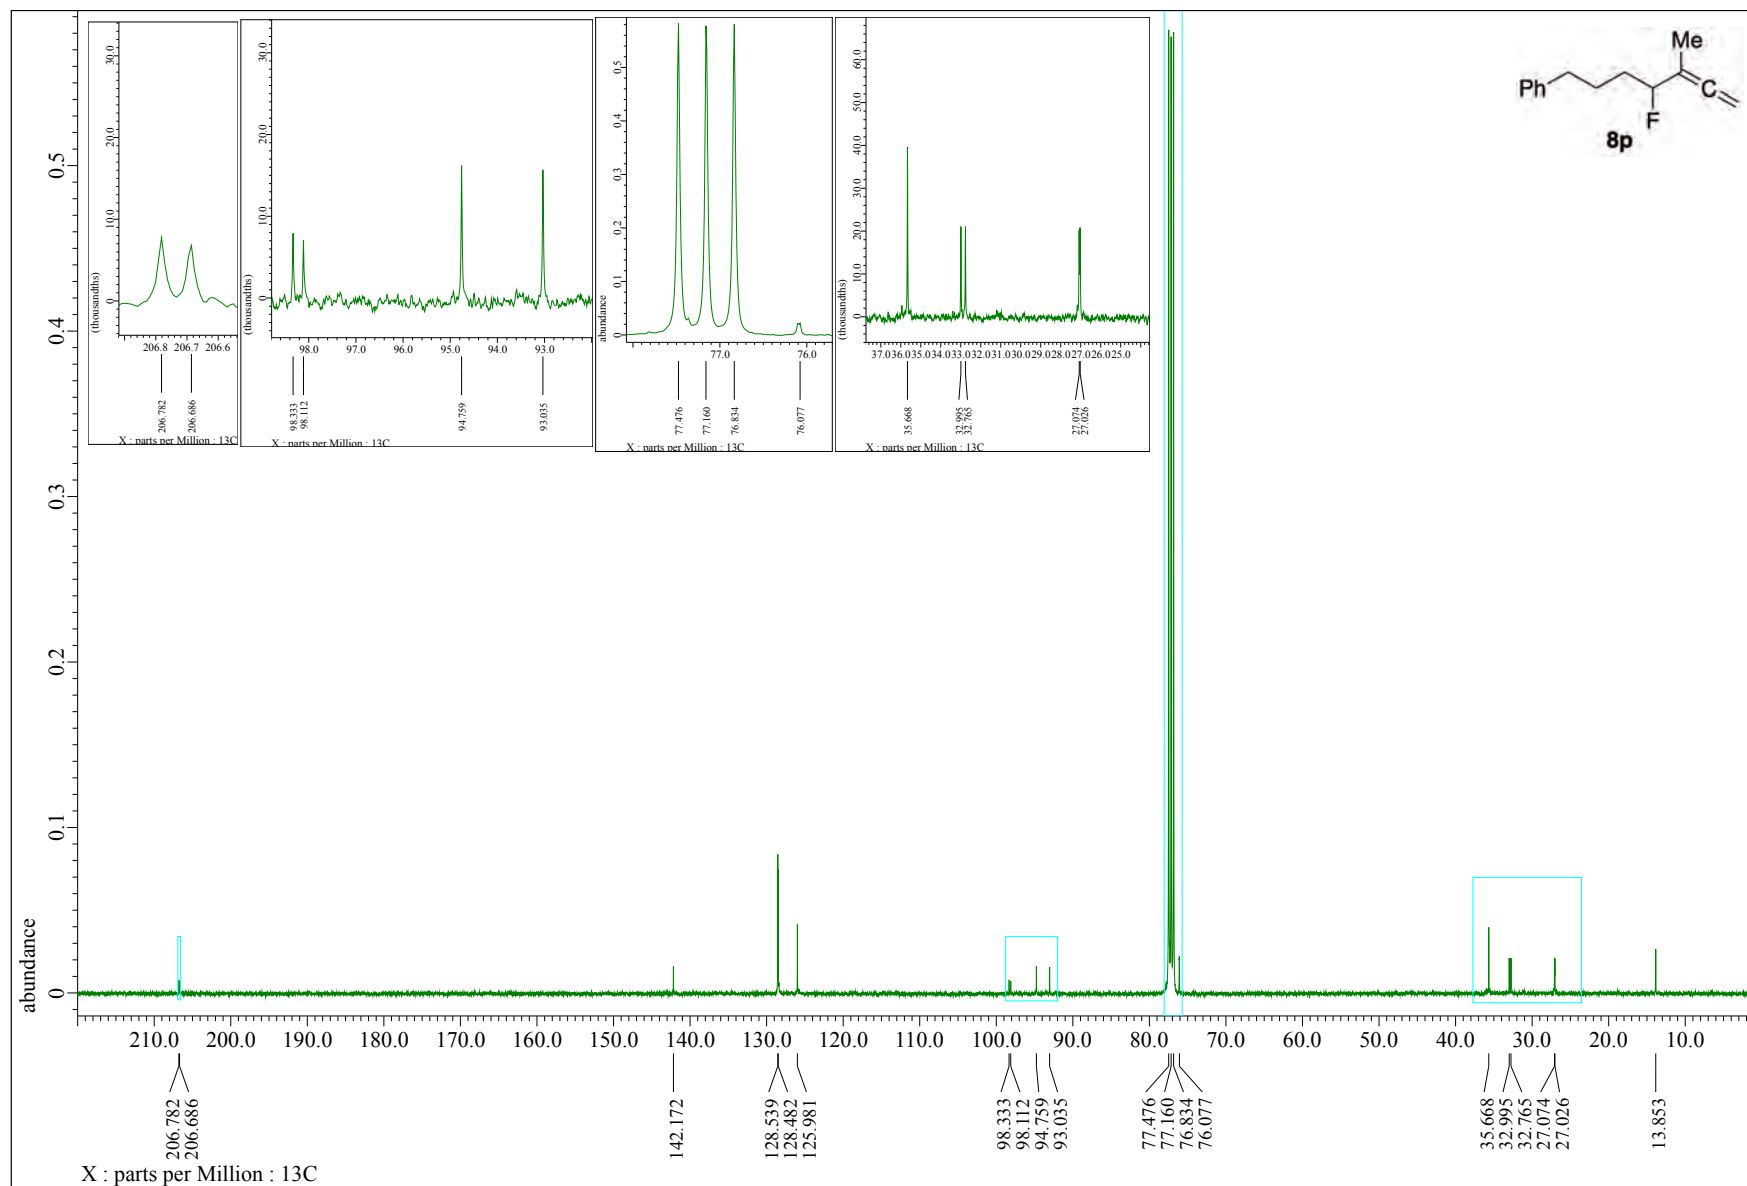



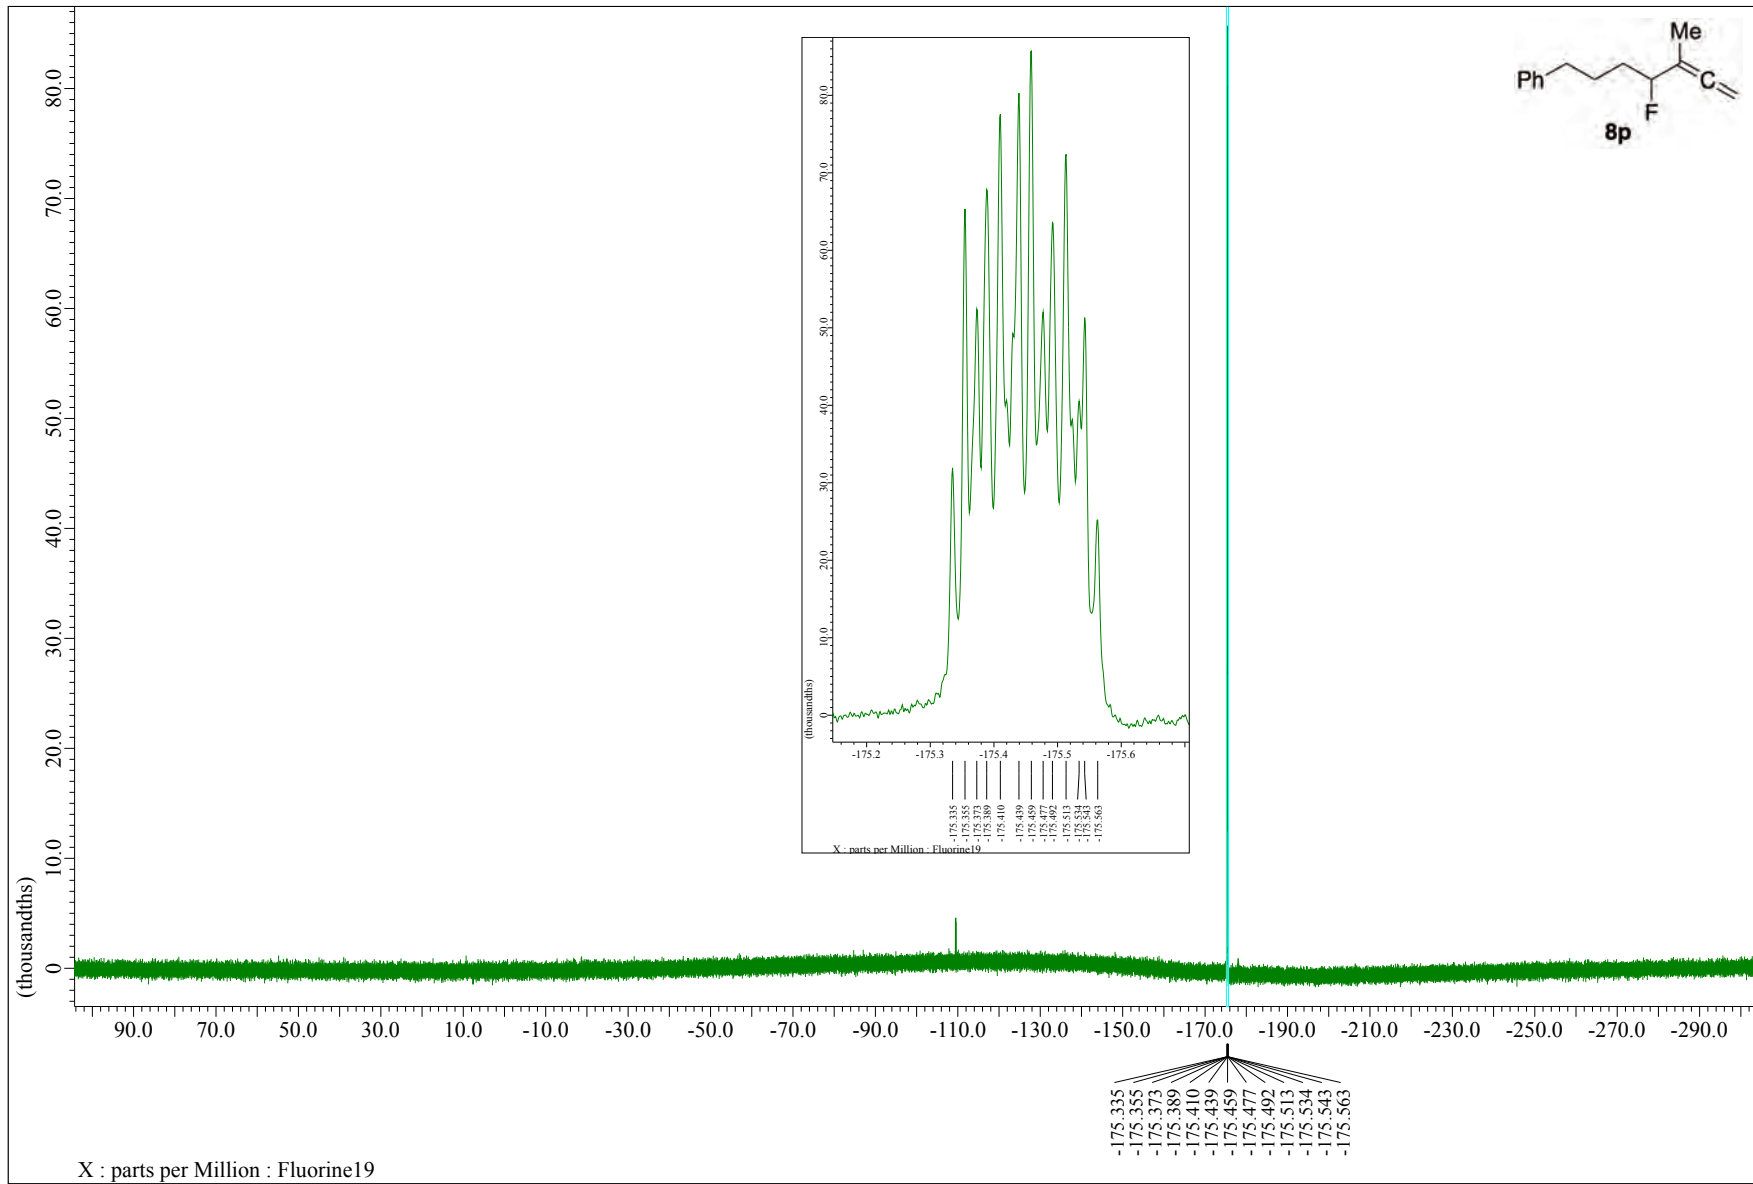

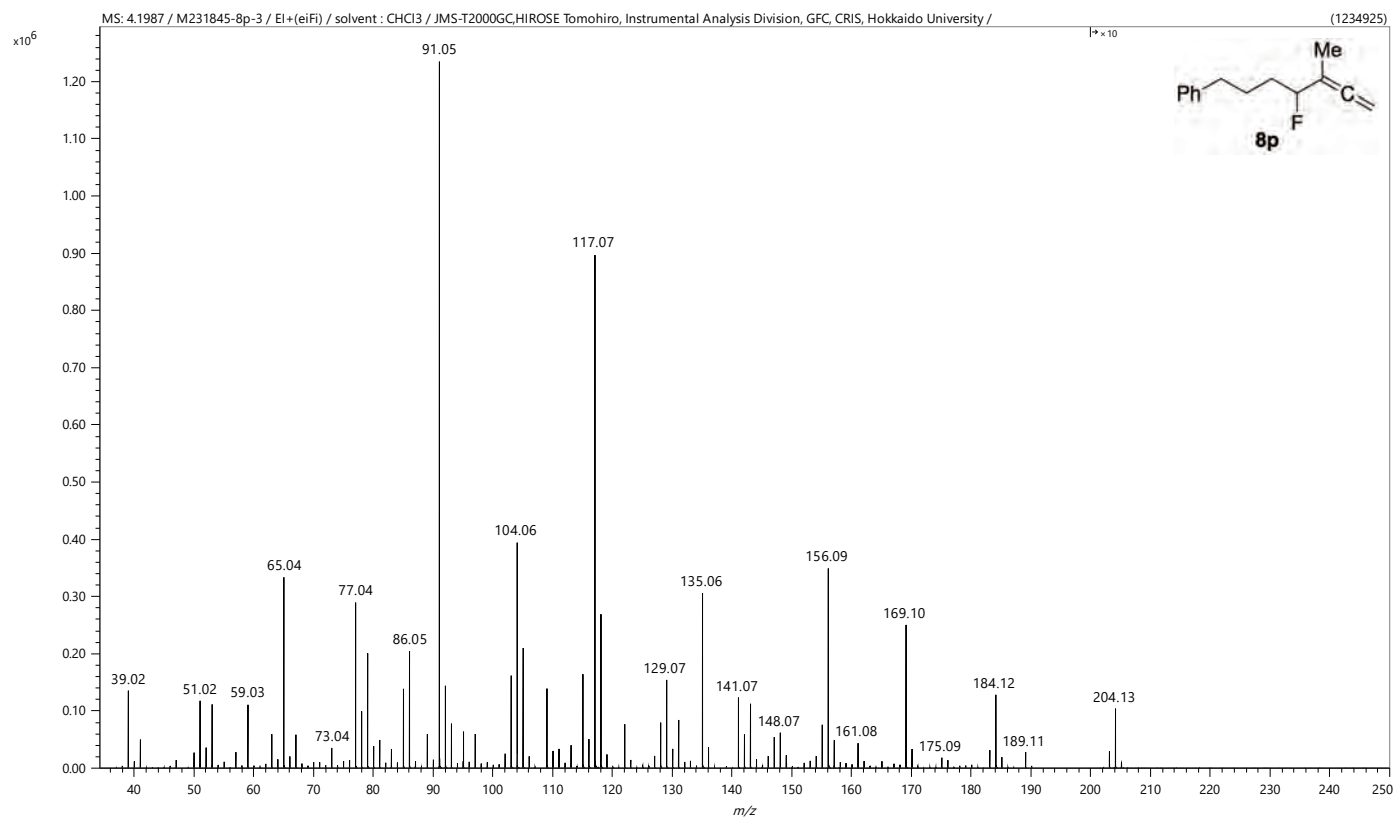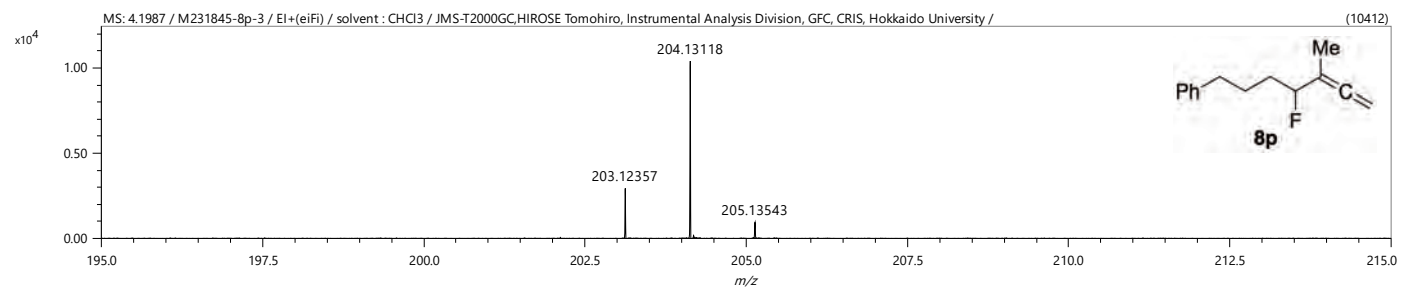

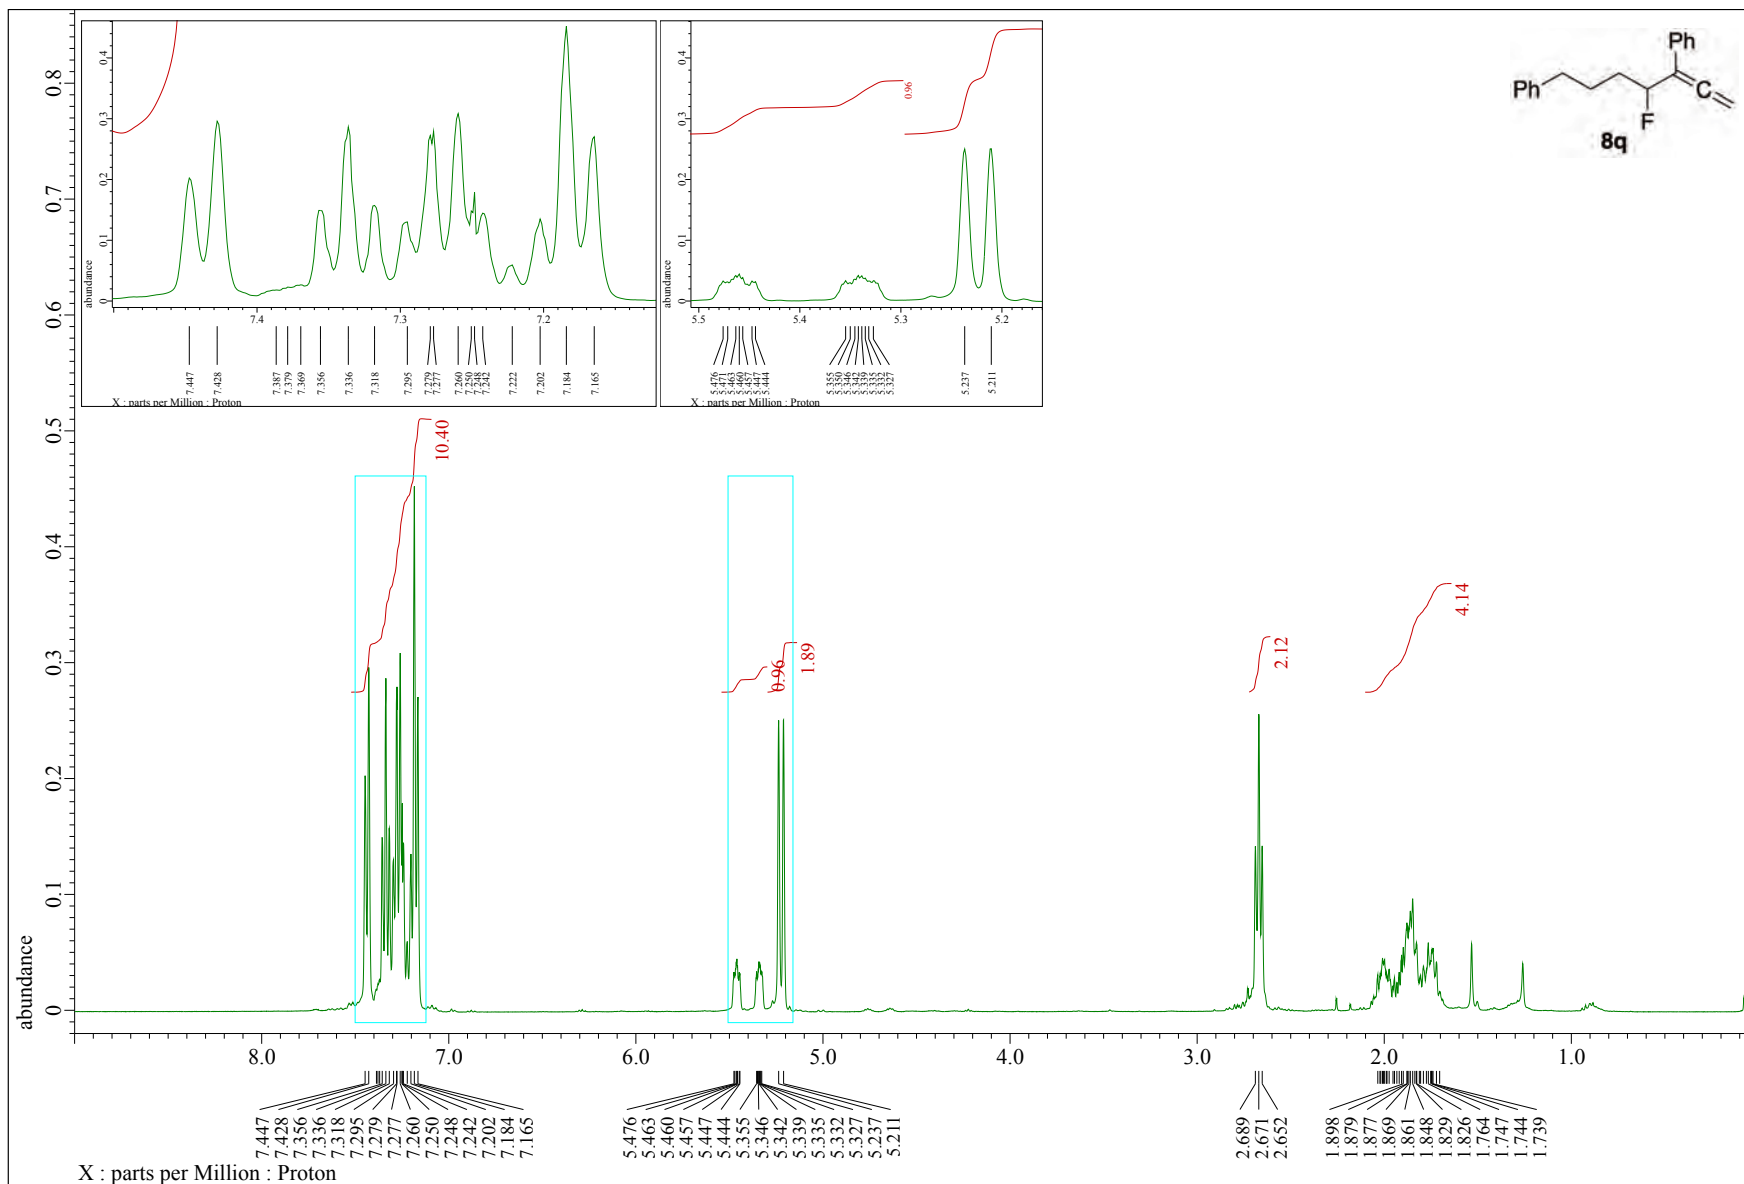

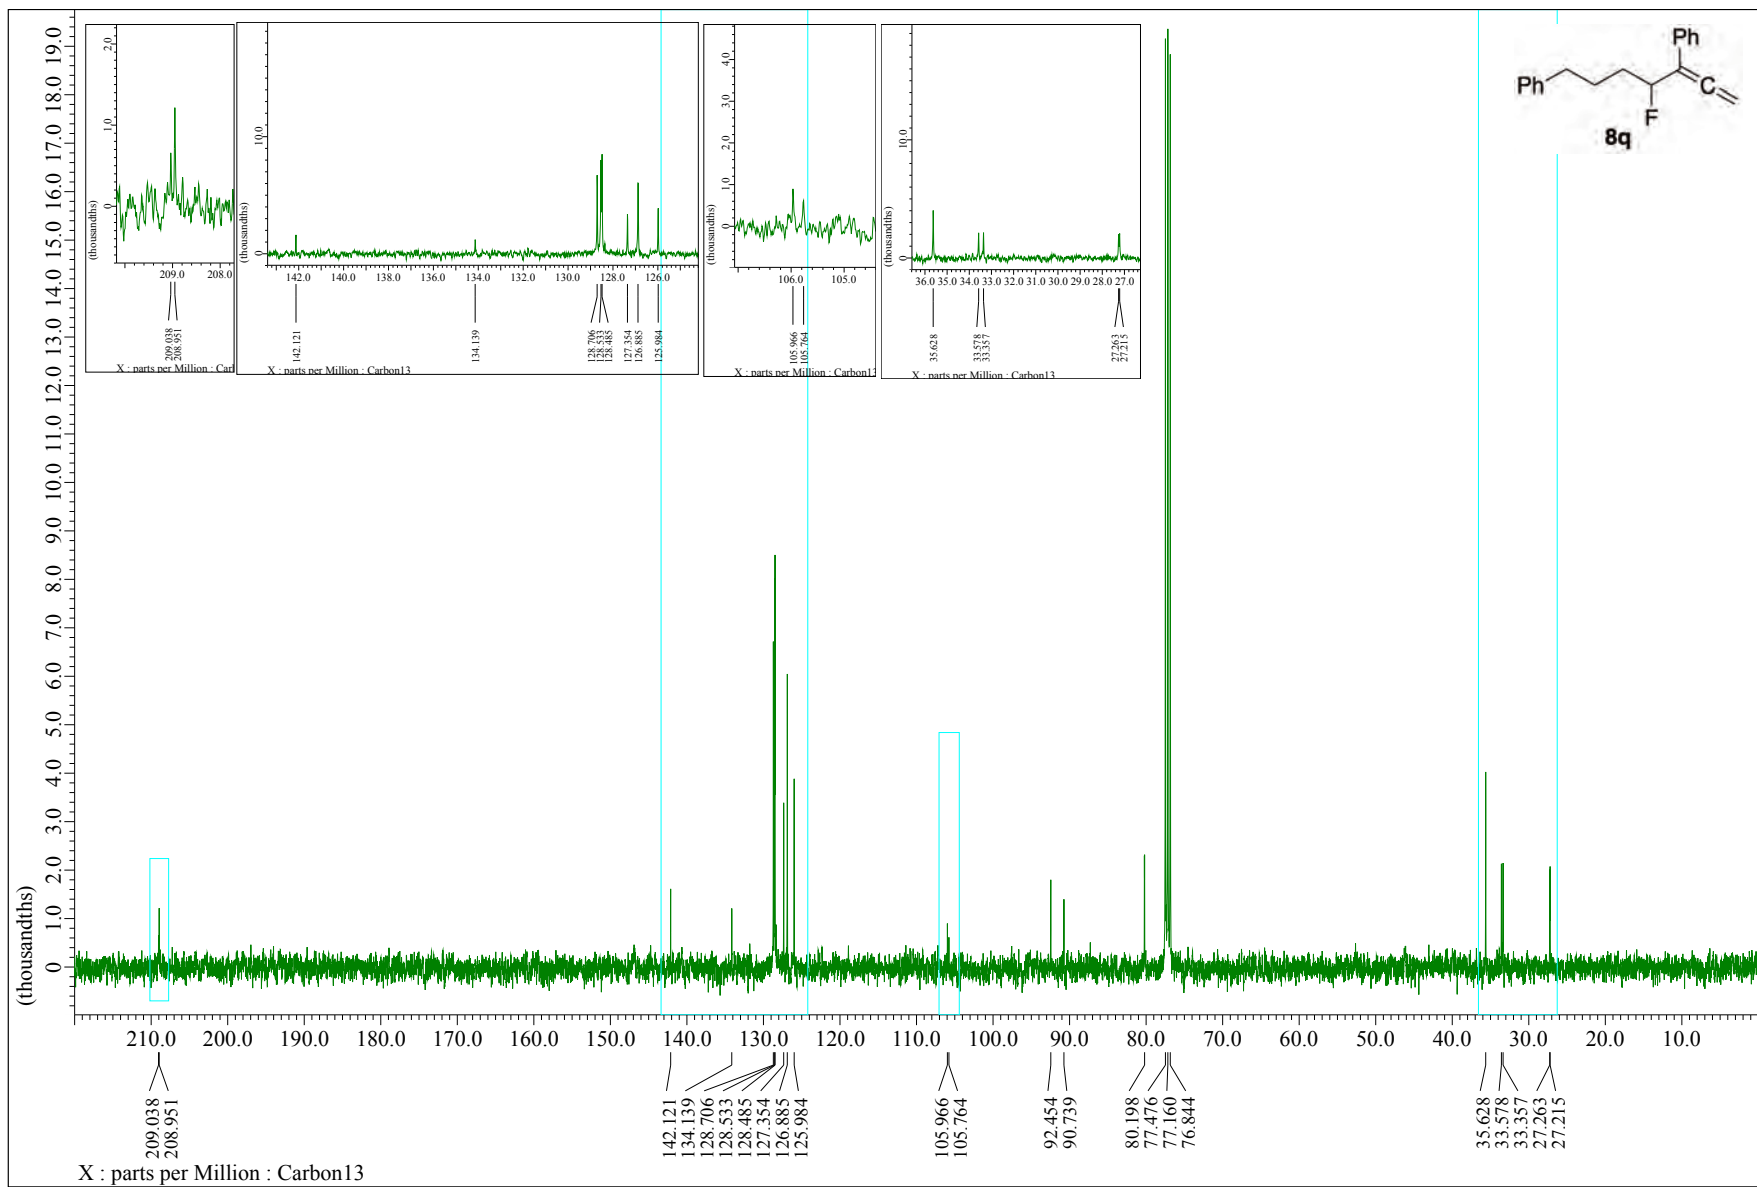

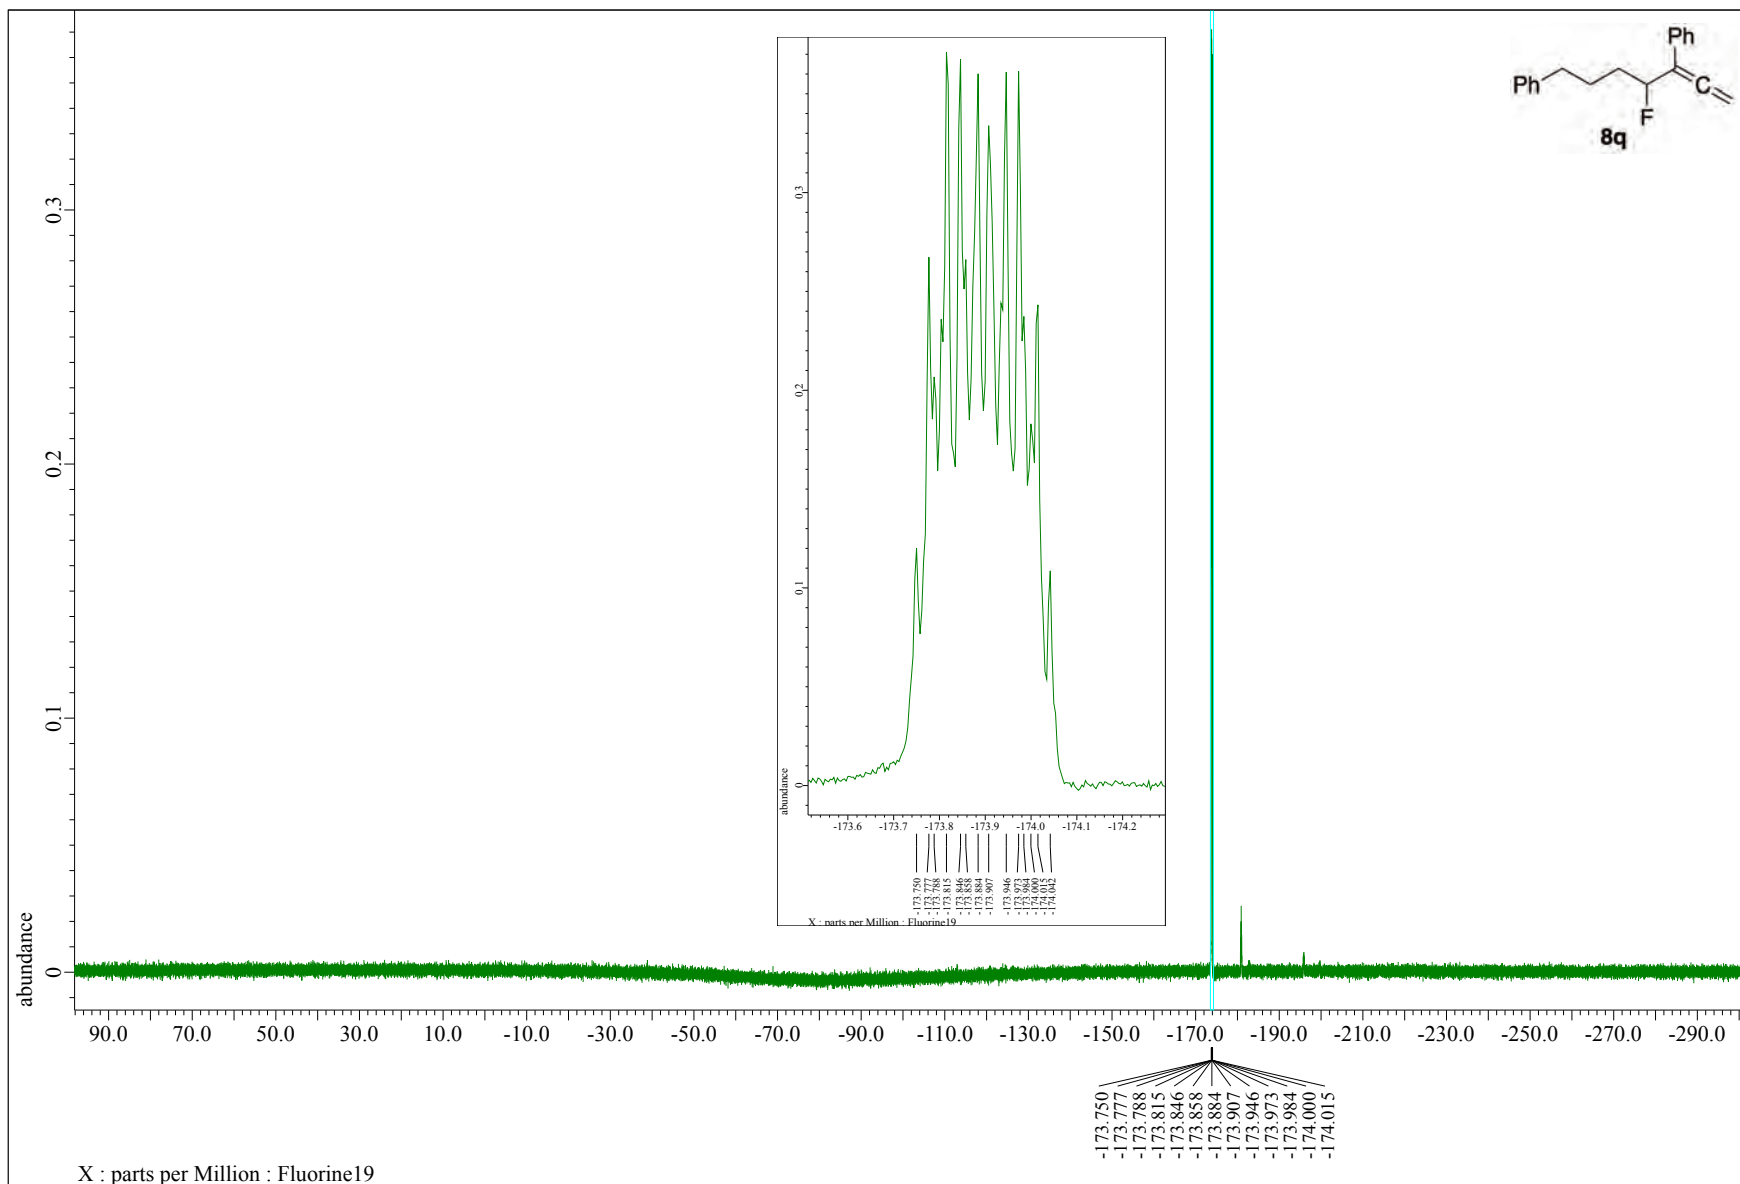

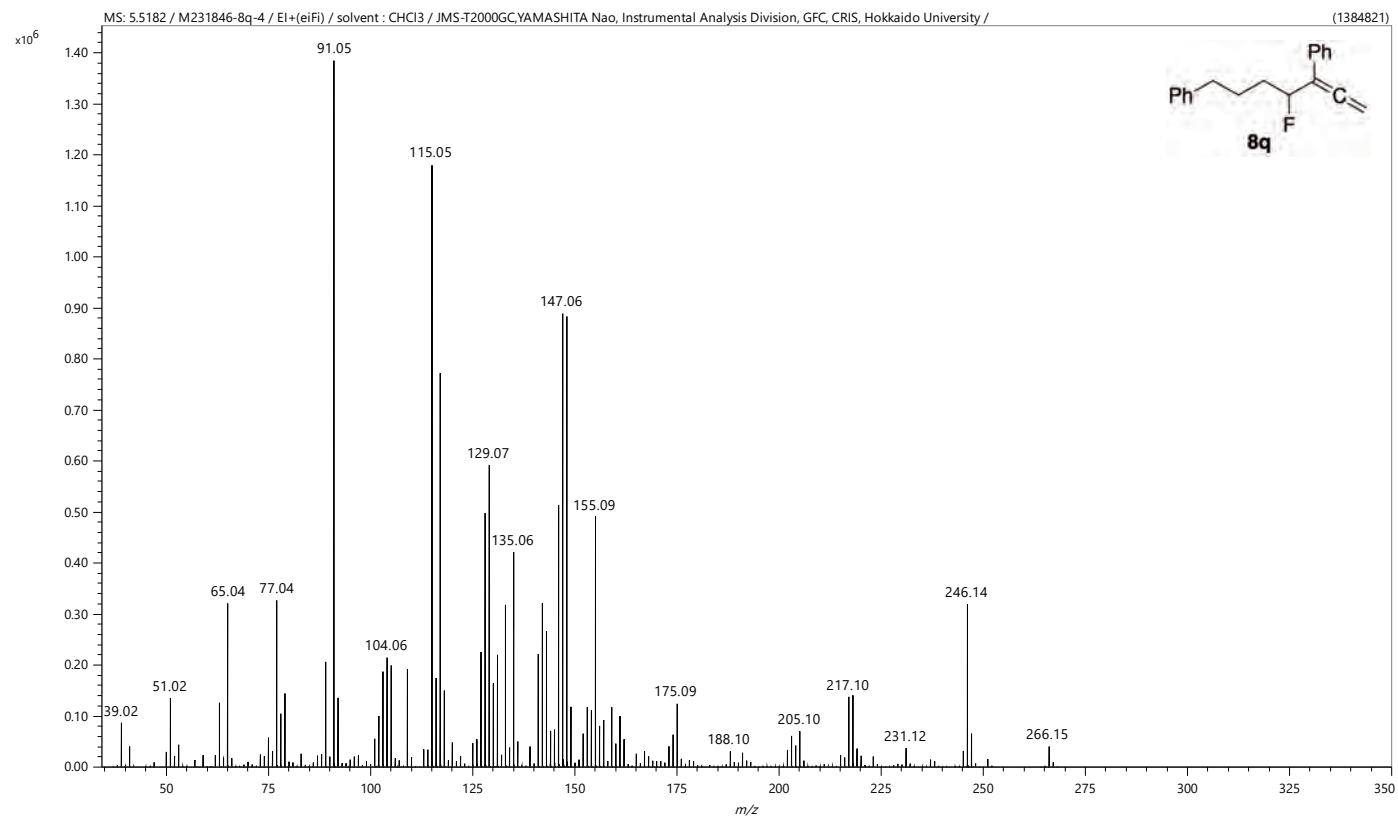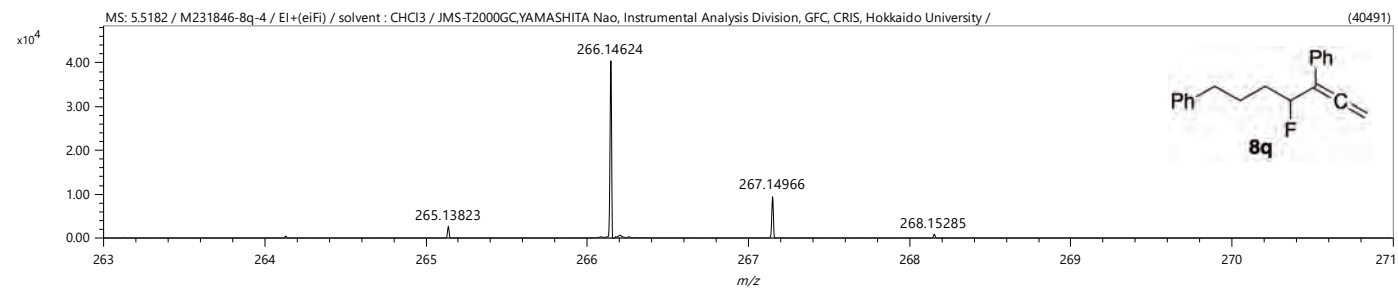

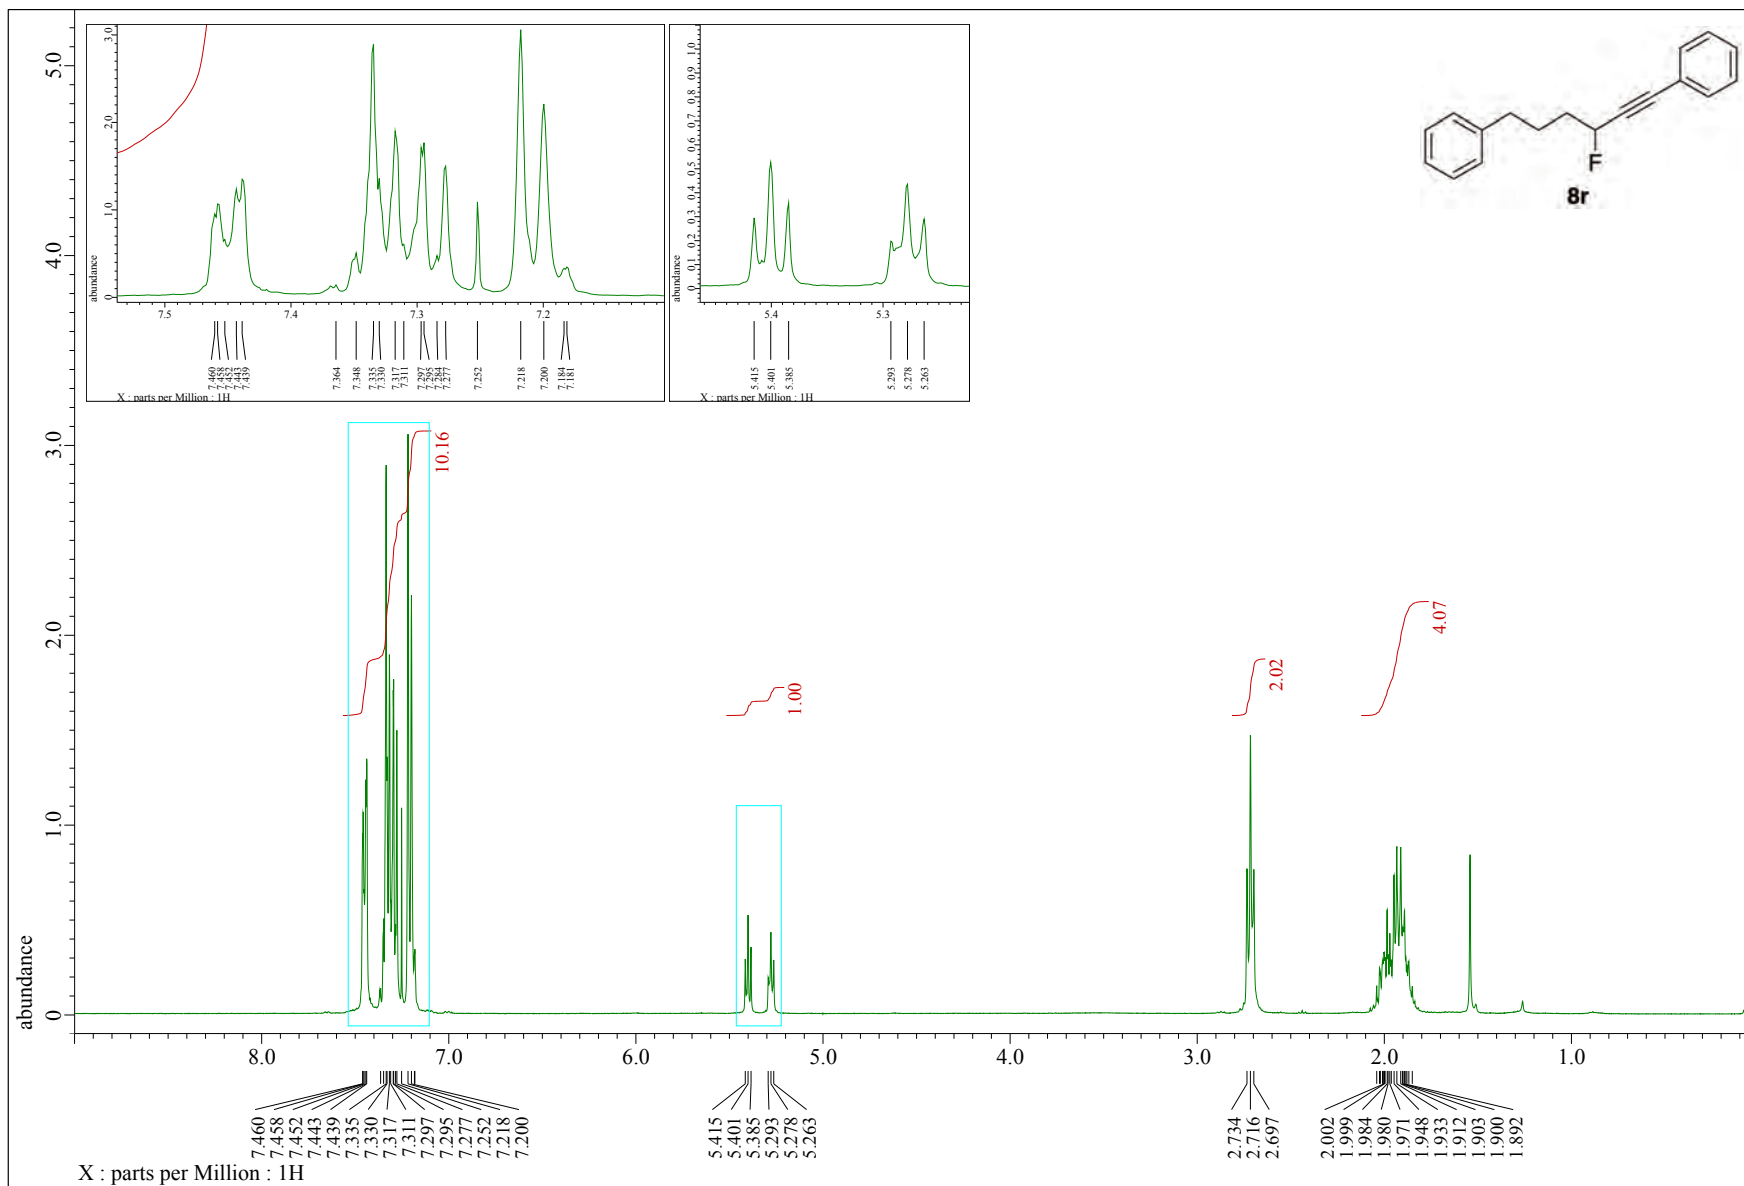

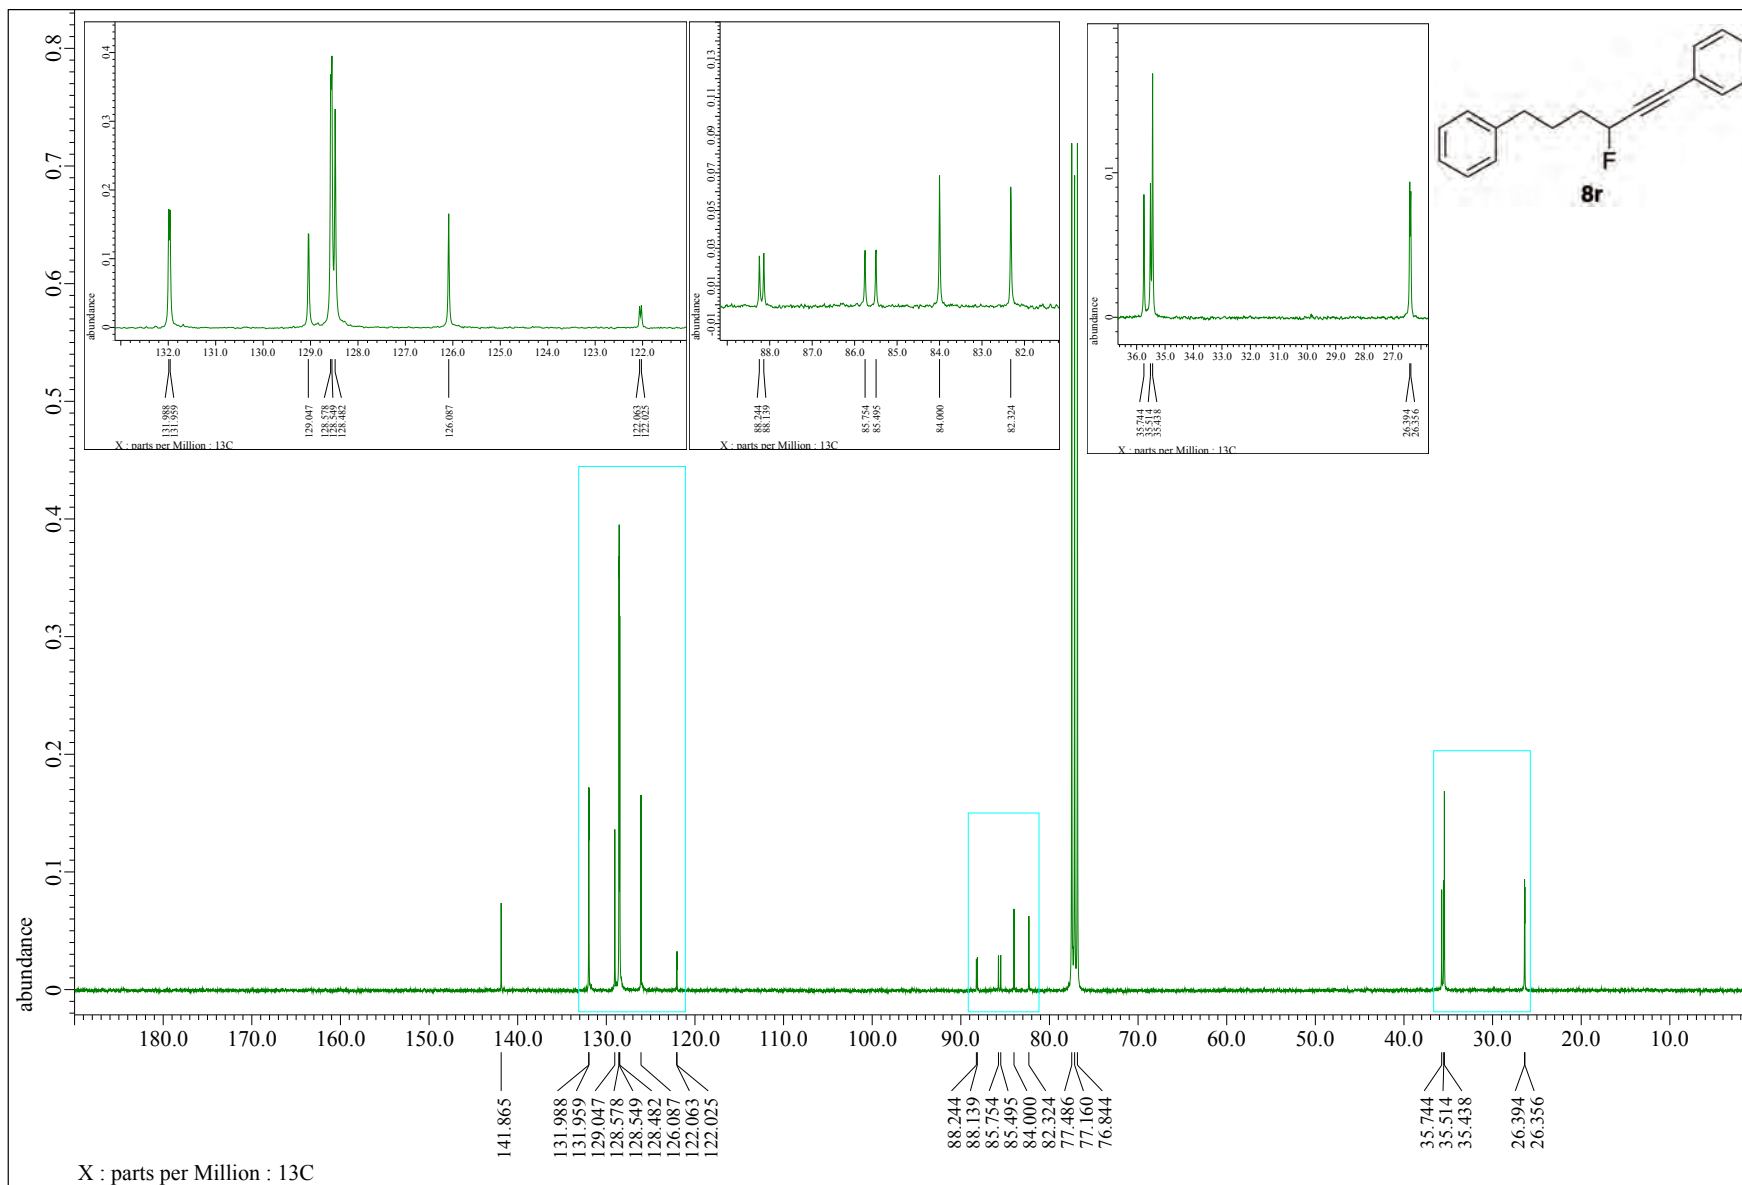



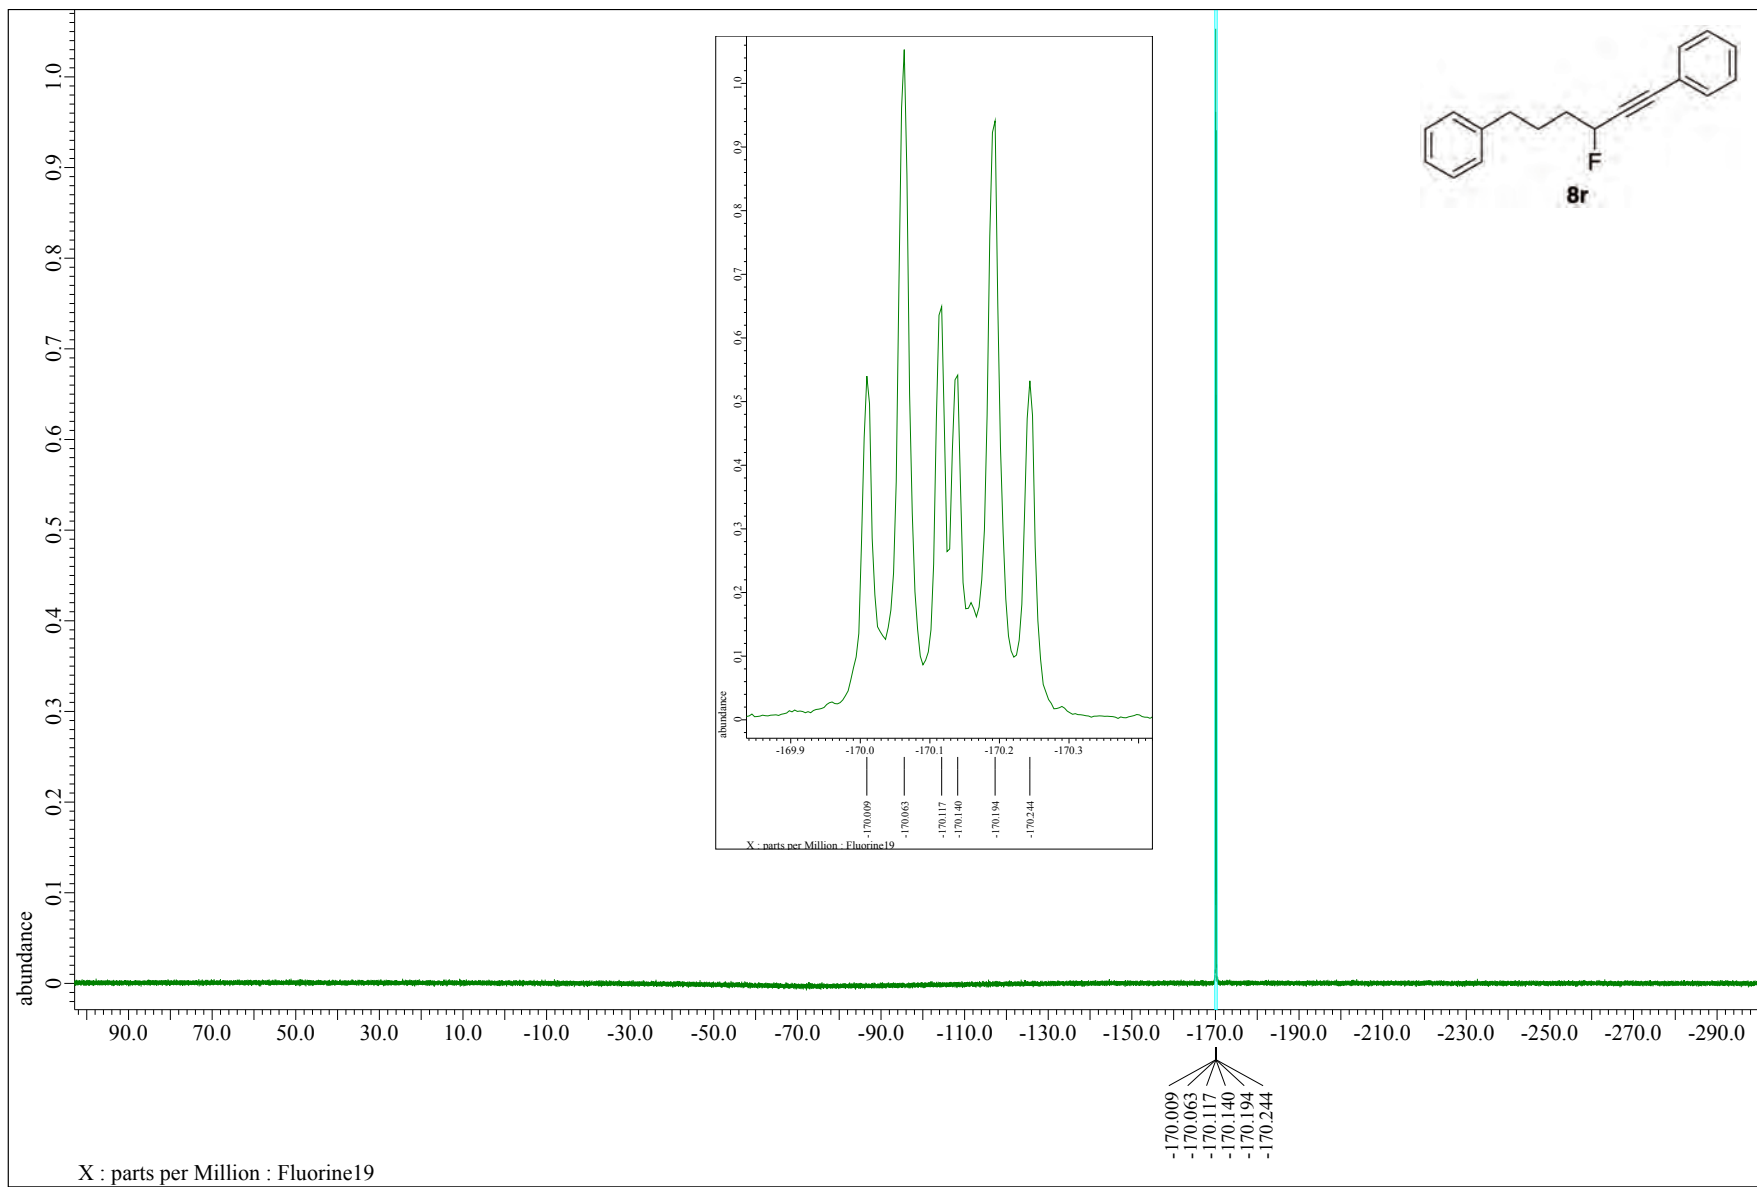

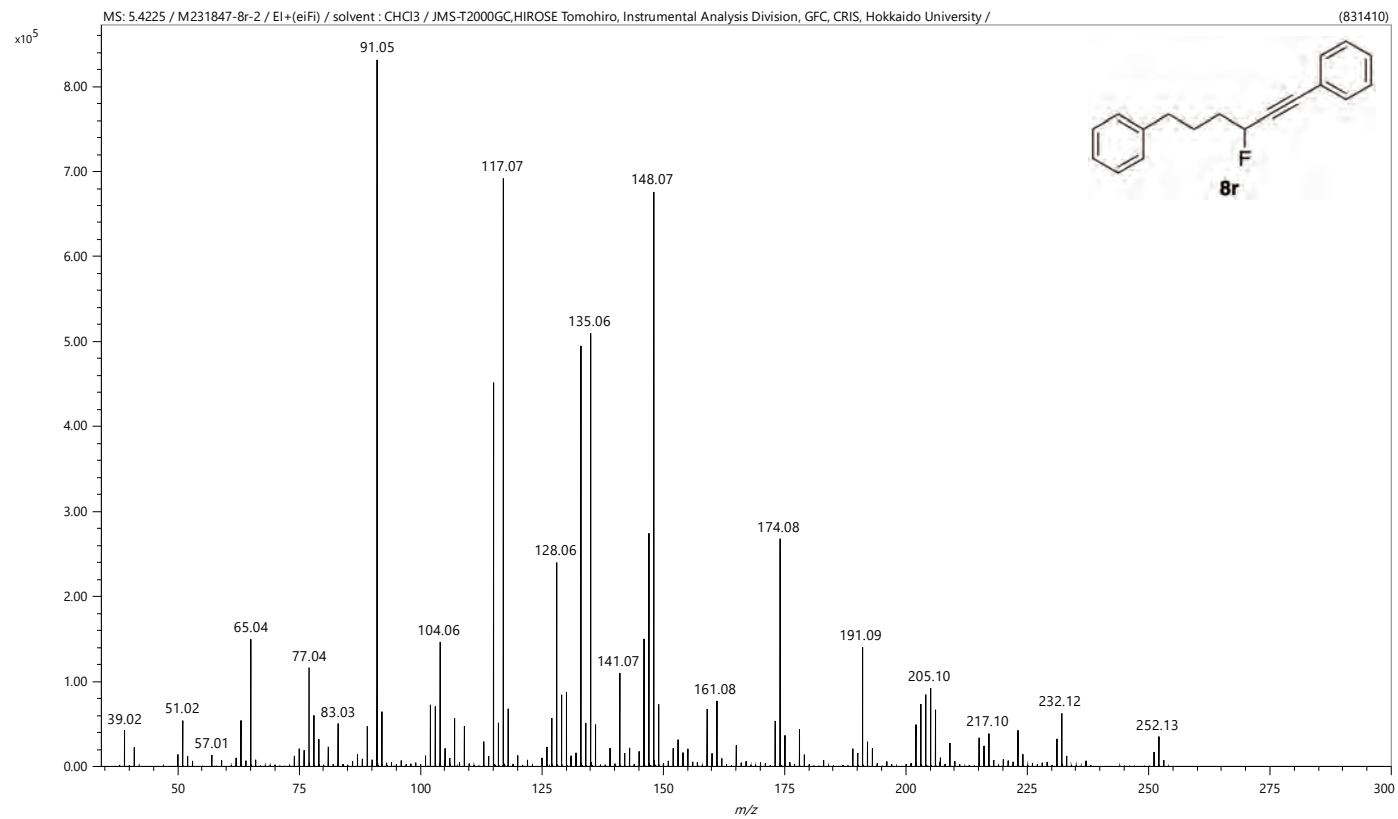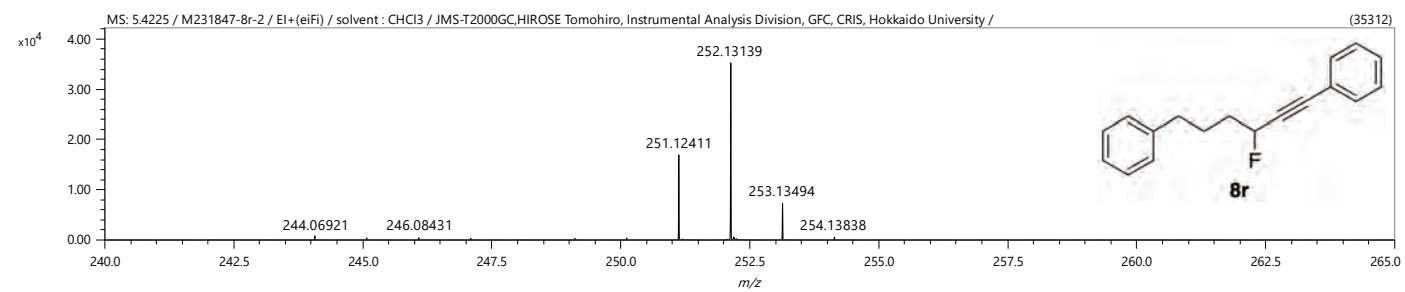

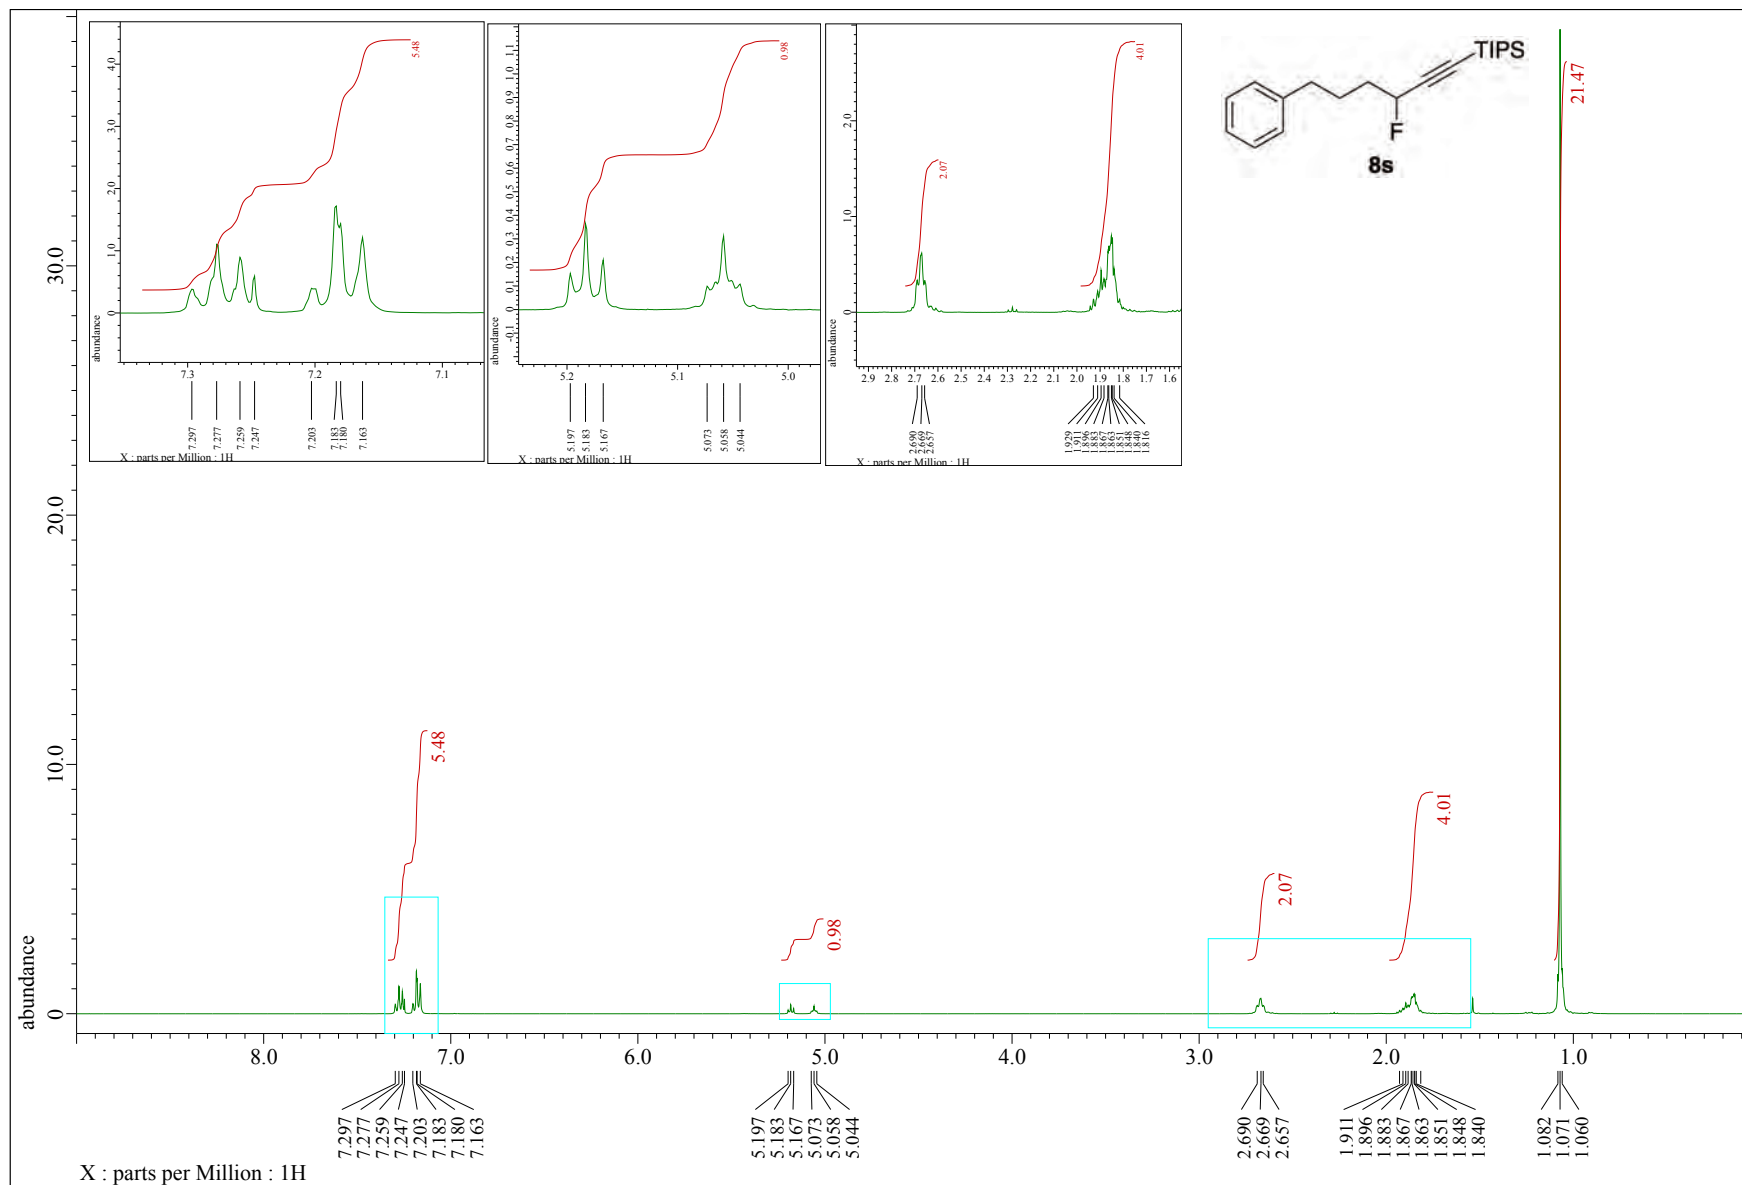

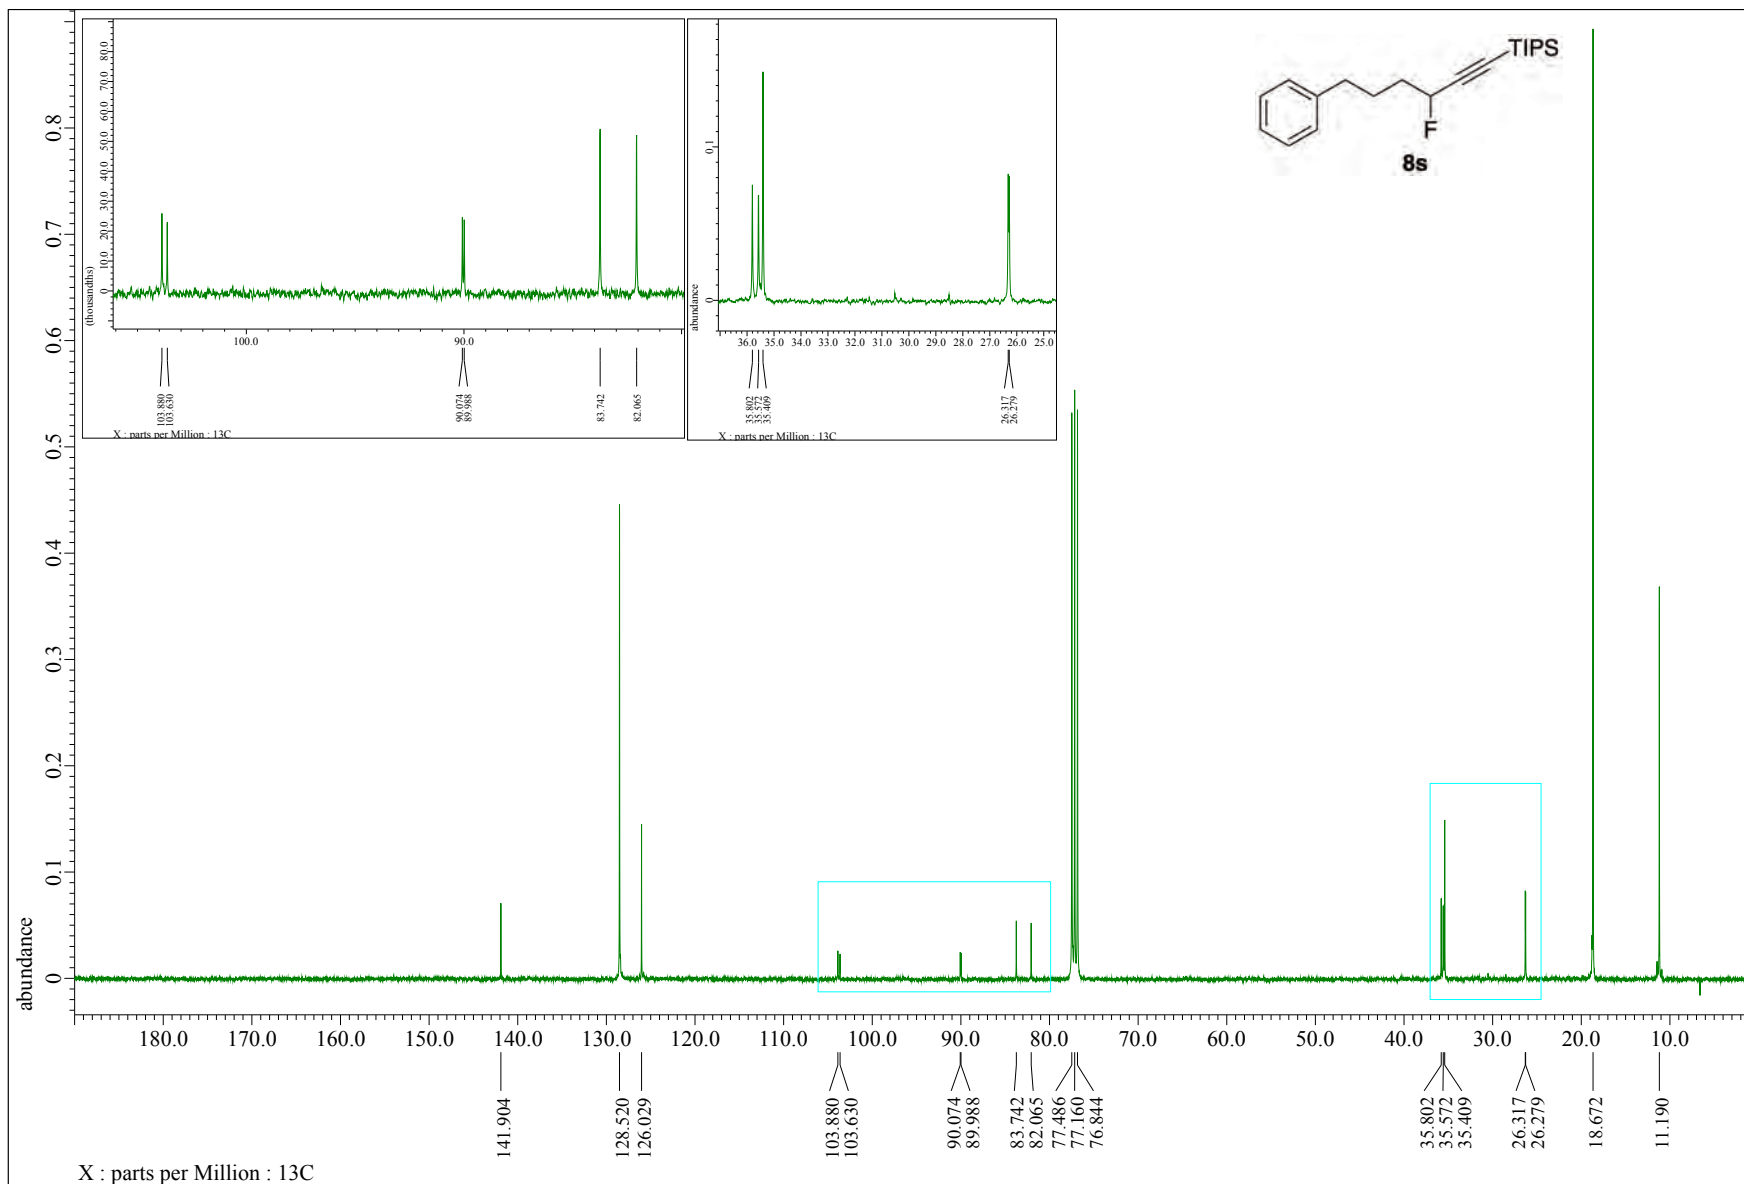

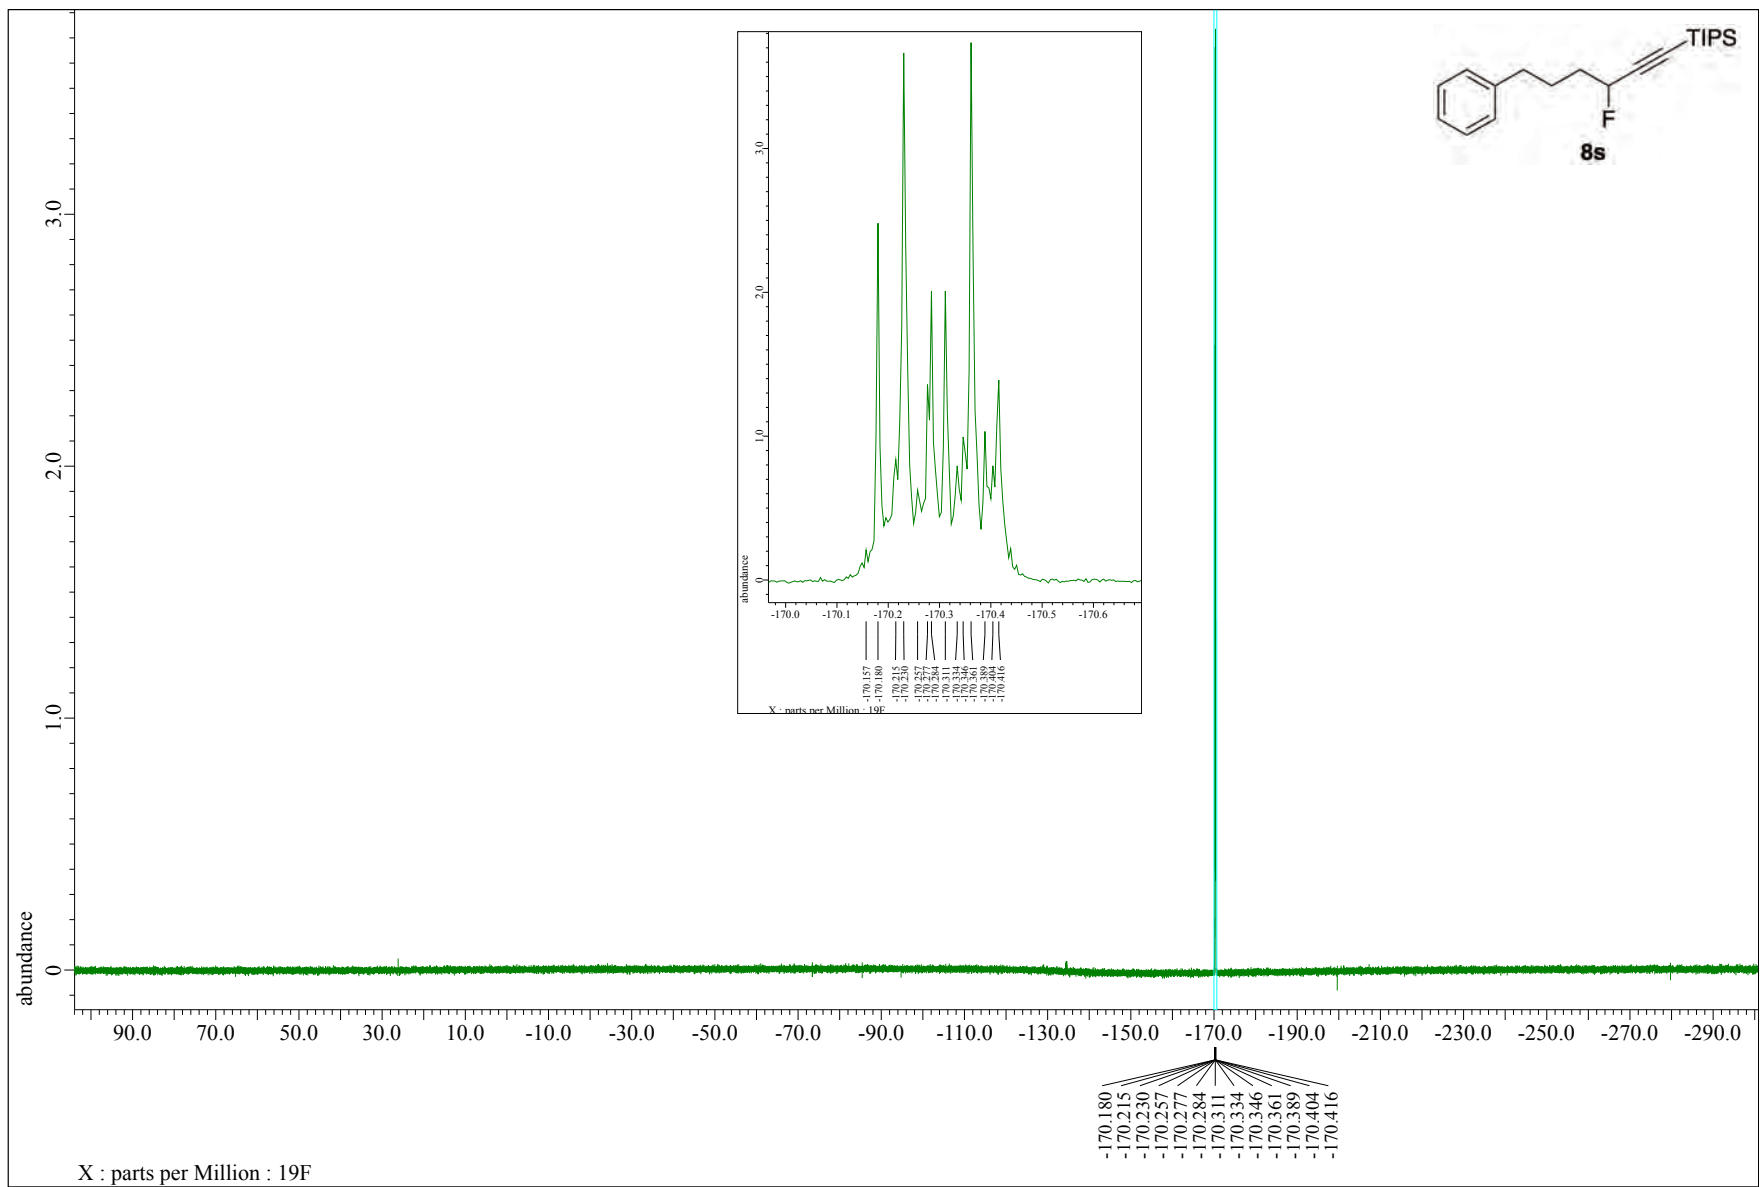

Sample No. : C:\Xcalibur\...\1228\BG\_231848\_8: \_

Instrument : Exactive Plus

Mobile phase solvent : MeOH

Operator name : hayashi harumi

Sample solvent : CHCl3

Date : 12/28/23 14:43:34

Instrumental method : C:\Xcalibur\methods\ESI\_100ul\S60\_100ul\_mz150\_2000pn.meth

Instrumental Analysis Division, Global Facility Center, Creative Research Institution, Hokkaido University

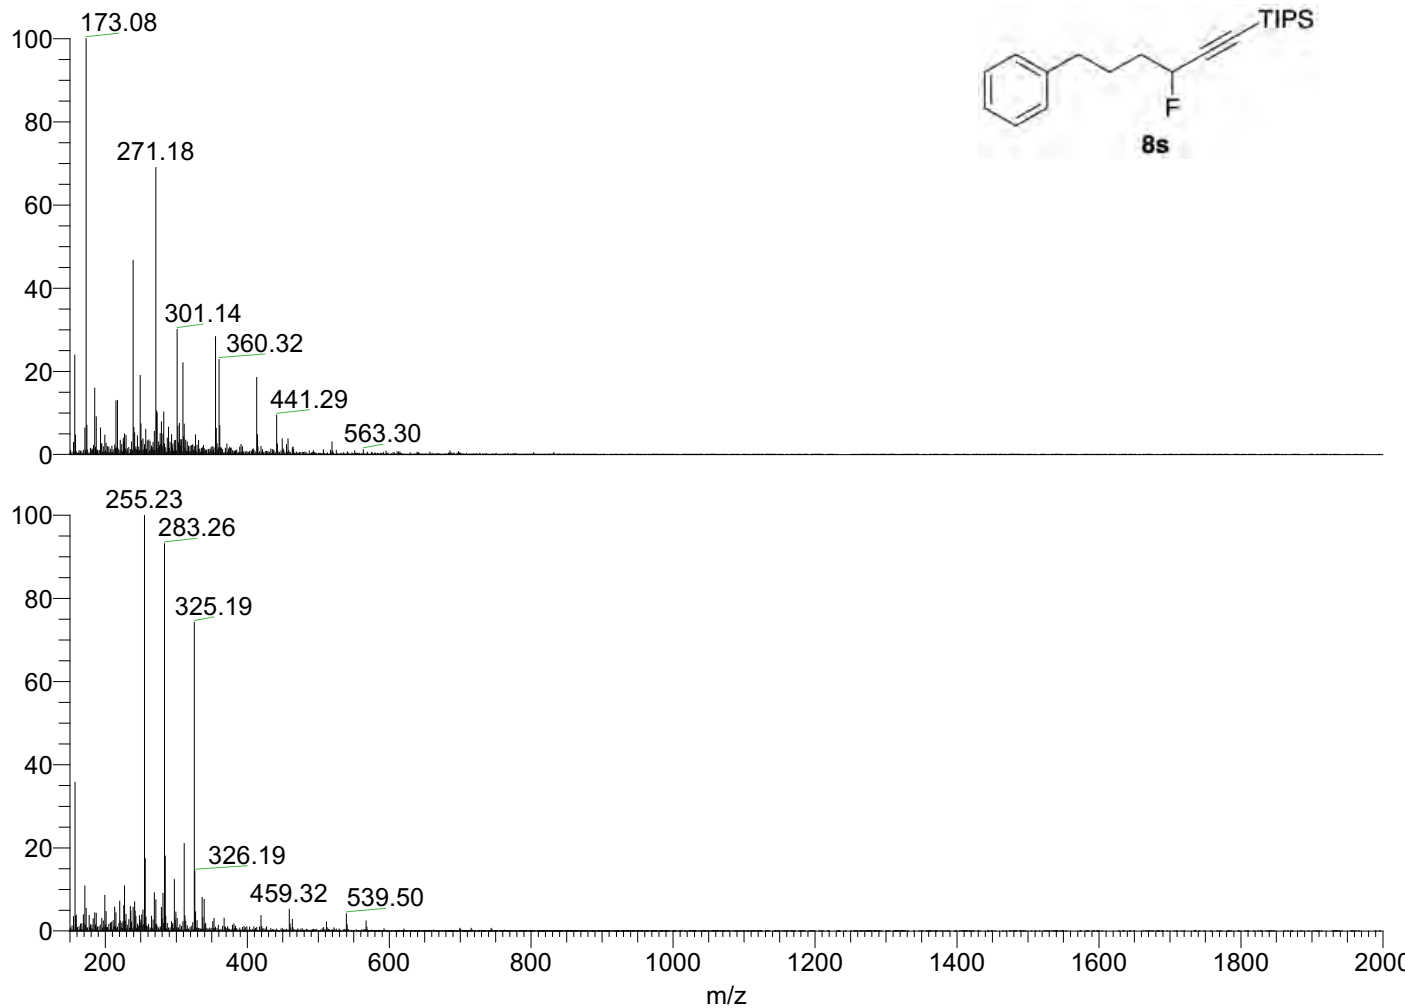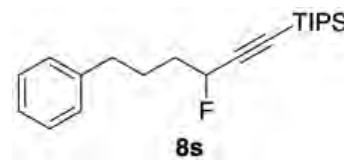

NL: 3.43E7  
BG\_231848\_8s\_pn2#1  
9-32 RT: 0.31-0.48  
AV: 7 T: FTMS + c  
ESI Full ms  
[150.00-2000.00]

NL: 1.59E7  
BG\_231848\_8s\_pn2#1  
9-32 RT: 0.32-0.50  
AV: 7 T: FTMS - c ESI  
Full ms  
[150.00-2000.00]

Sample No. : C:\Xcalibur\...1228\2010-8\_8s\_pn2

Instrument : Exactive Plus

Mobile phase solvent : MeOH

Operator name : hayashi harumi

Sample solvent : CHCl3

Date : 12/28/23 14:31:28

Instrumental method : C:\Xcalibur\methods\ESI\_100ul\S60\_100ul\_mz150\_2000pn.meth

Instrumental Analysis Division, Global Facility Center, Creative Research Institution, Hokkaido University

231848\_8s\_pn2 #22-26 RT: 0.36-0.39 AV: 2 NL: 2.57E6

T: FTMS + p ESI Full ms [150.0000-2000.0000]

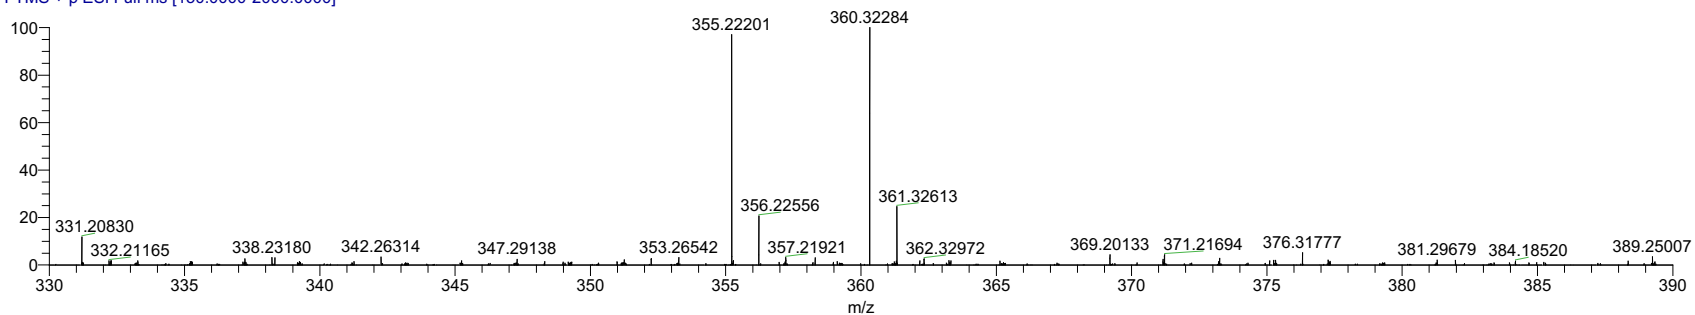

231848\_8s\_pn2 #26-29 RT: 0.42-0.45 AV: 2 NL: 3.23E6

T: FTMS + p ESI Full ms [150.0000-2000.0000]

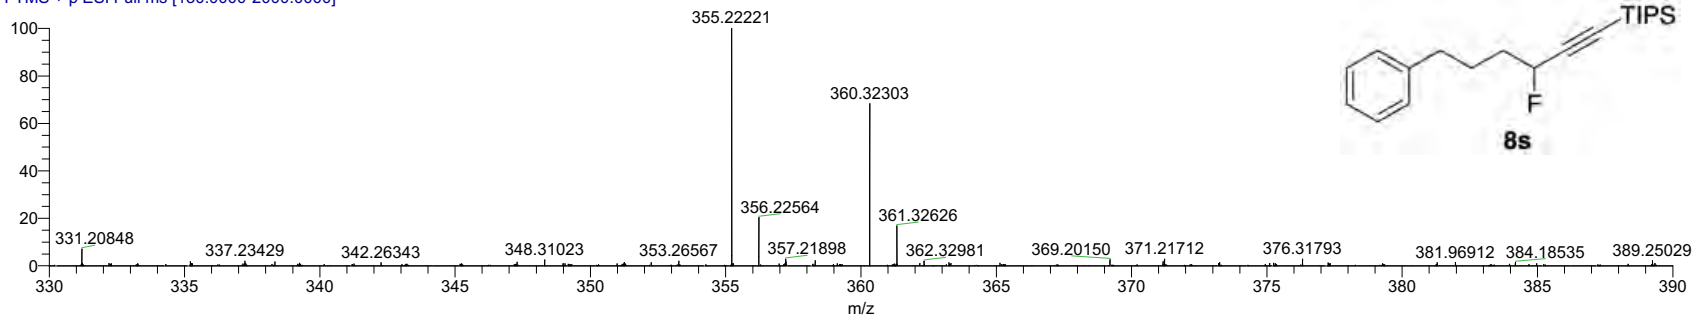

231848\_8s\_pn2 #30-33 RT: 0.48-0.51 AV: 2 NL: 1.79E6

T: FTMS + p ESI Full ms [150.0000-2000.0000]

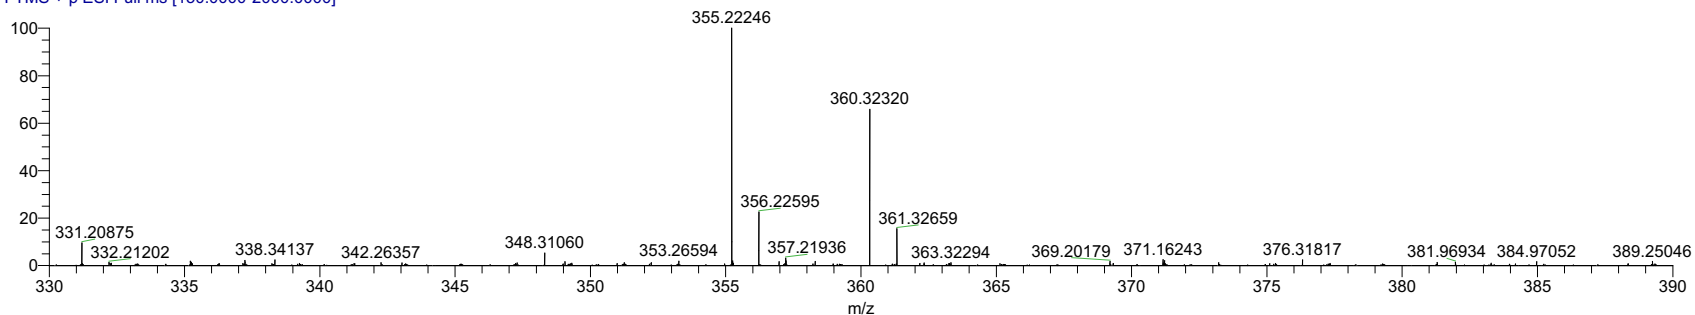

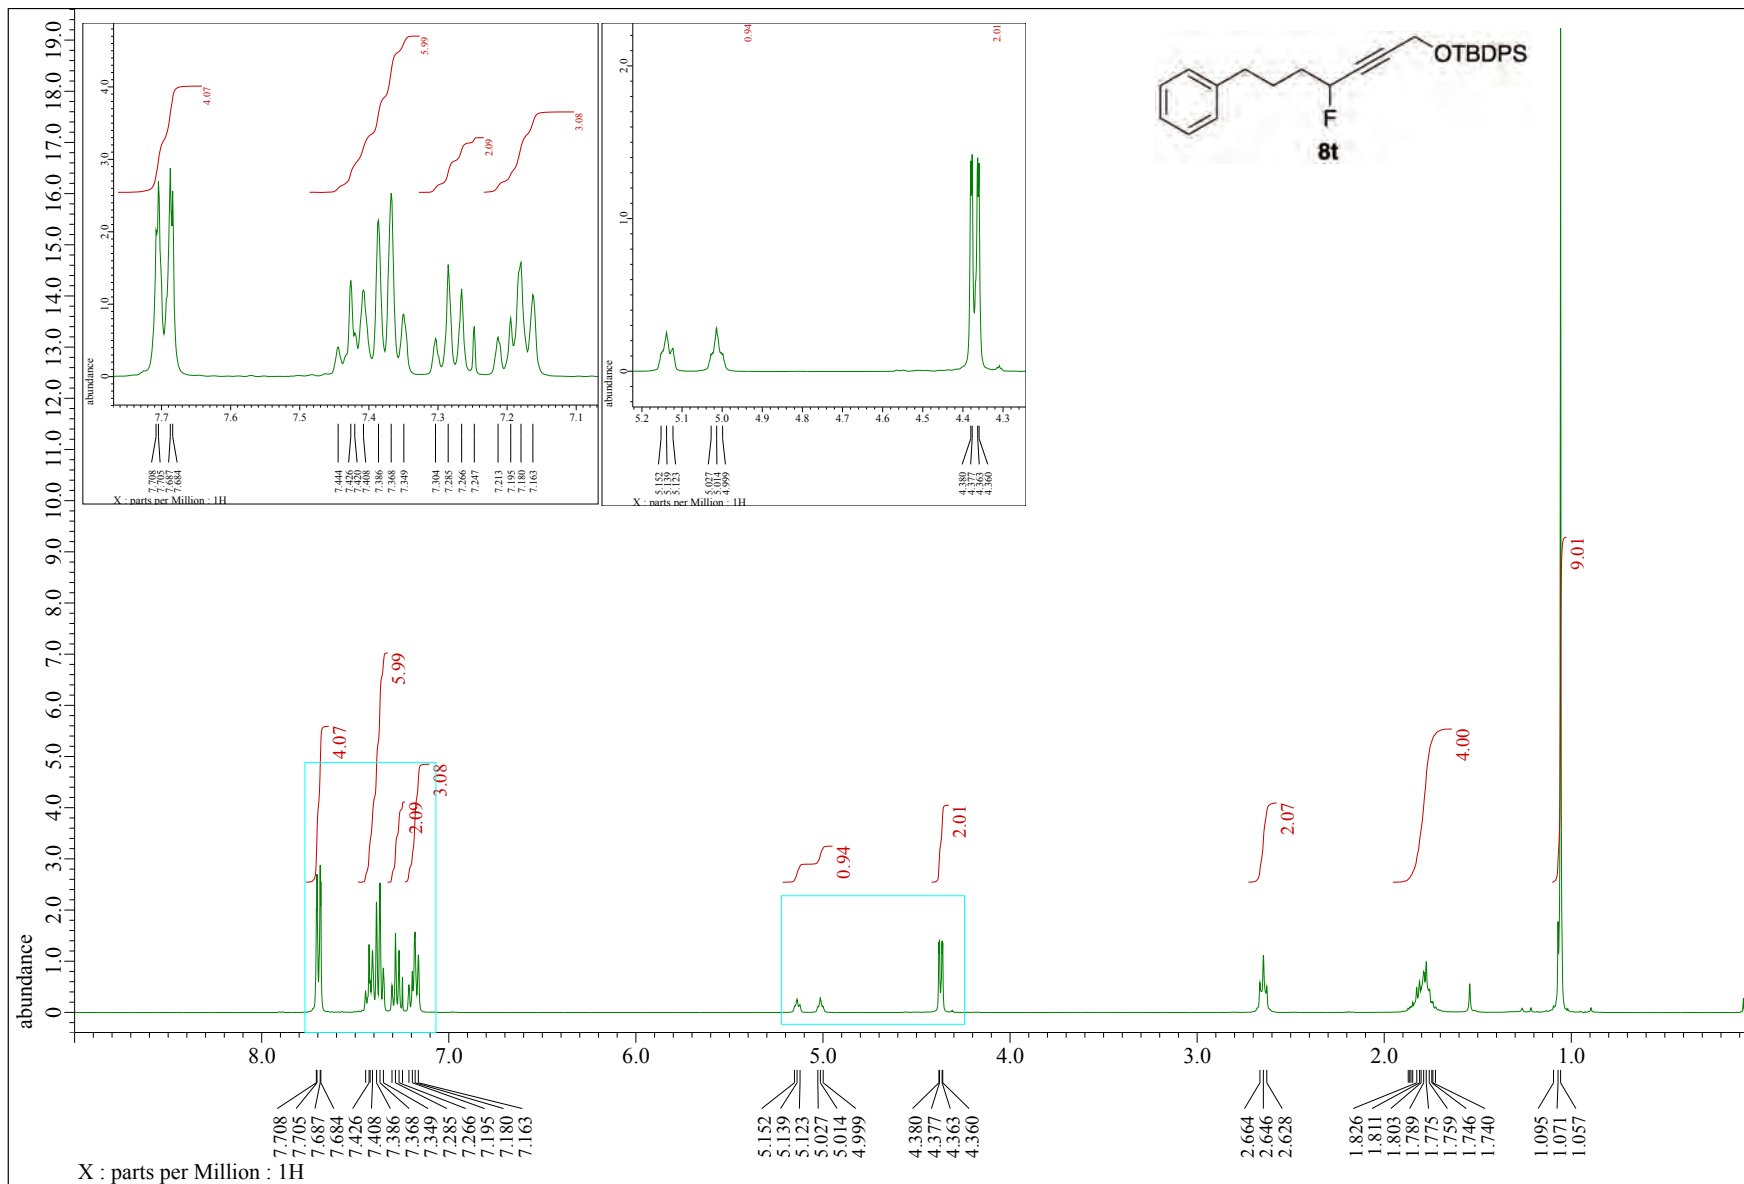



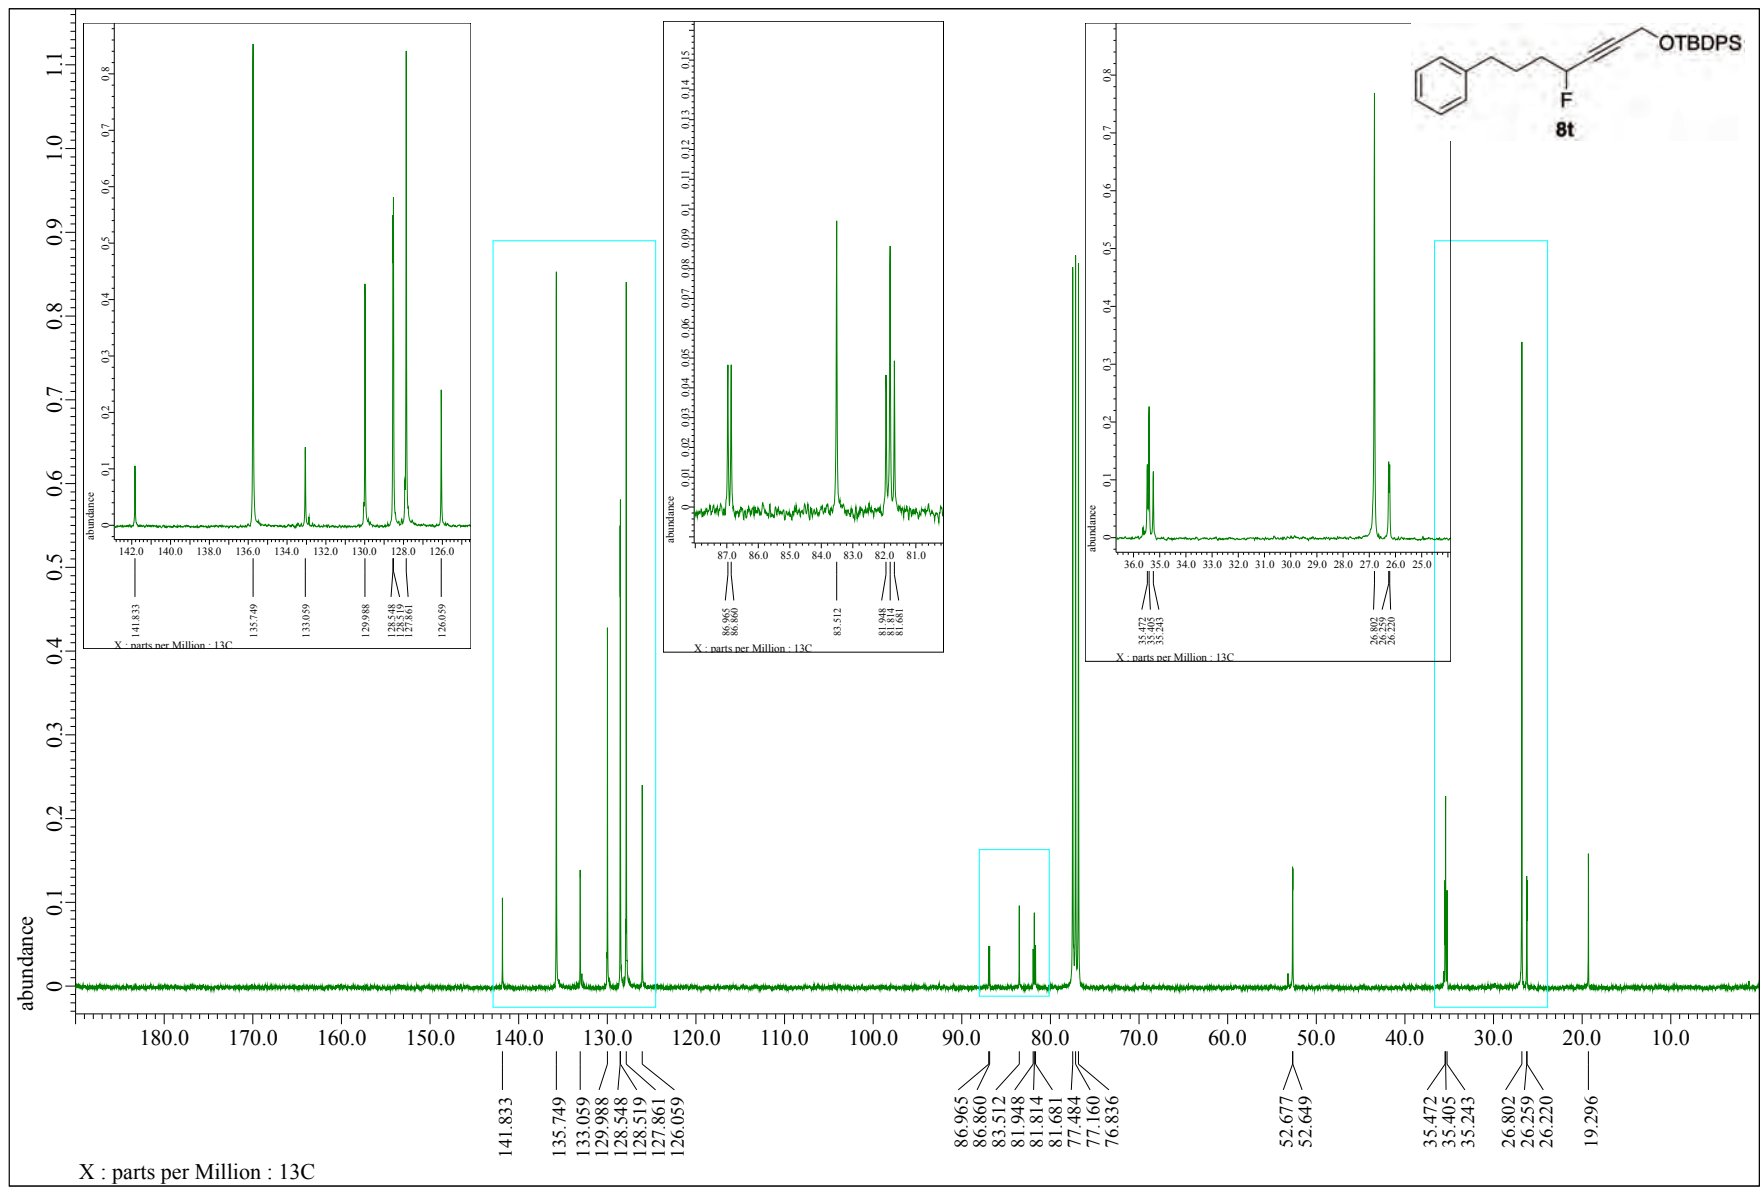

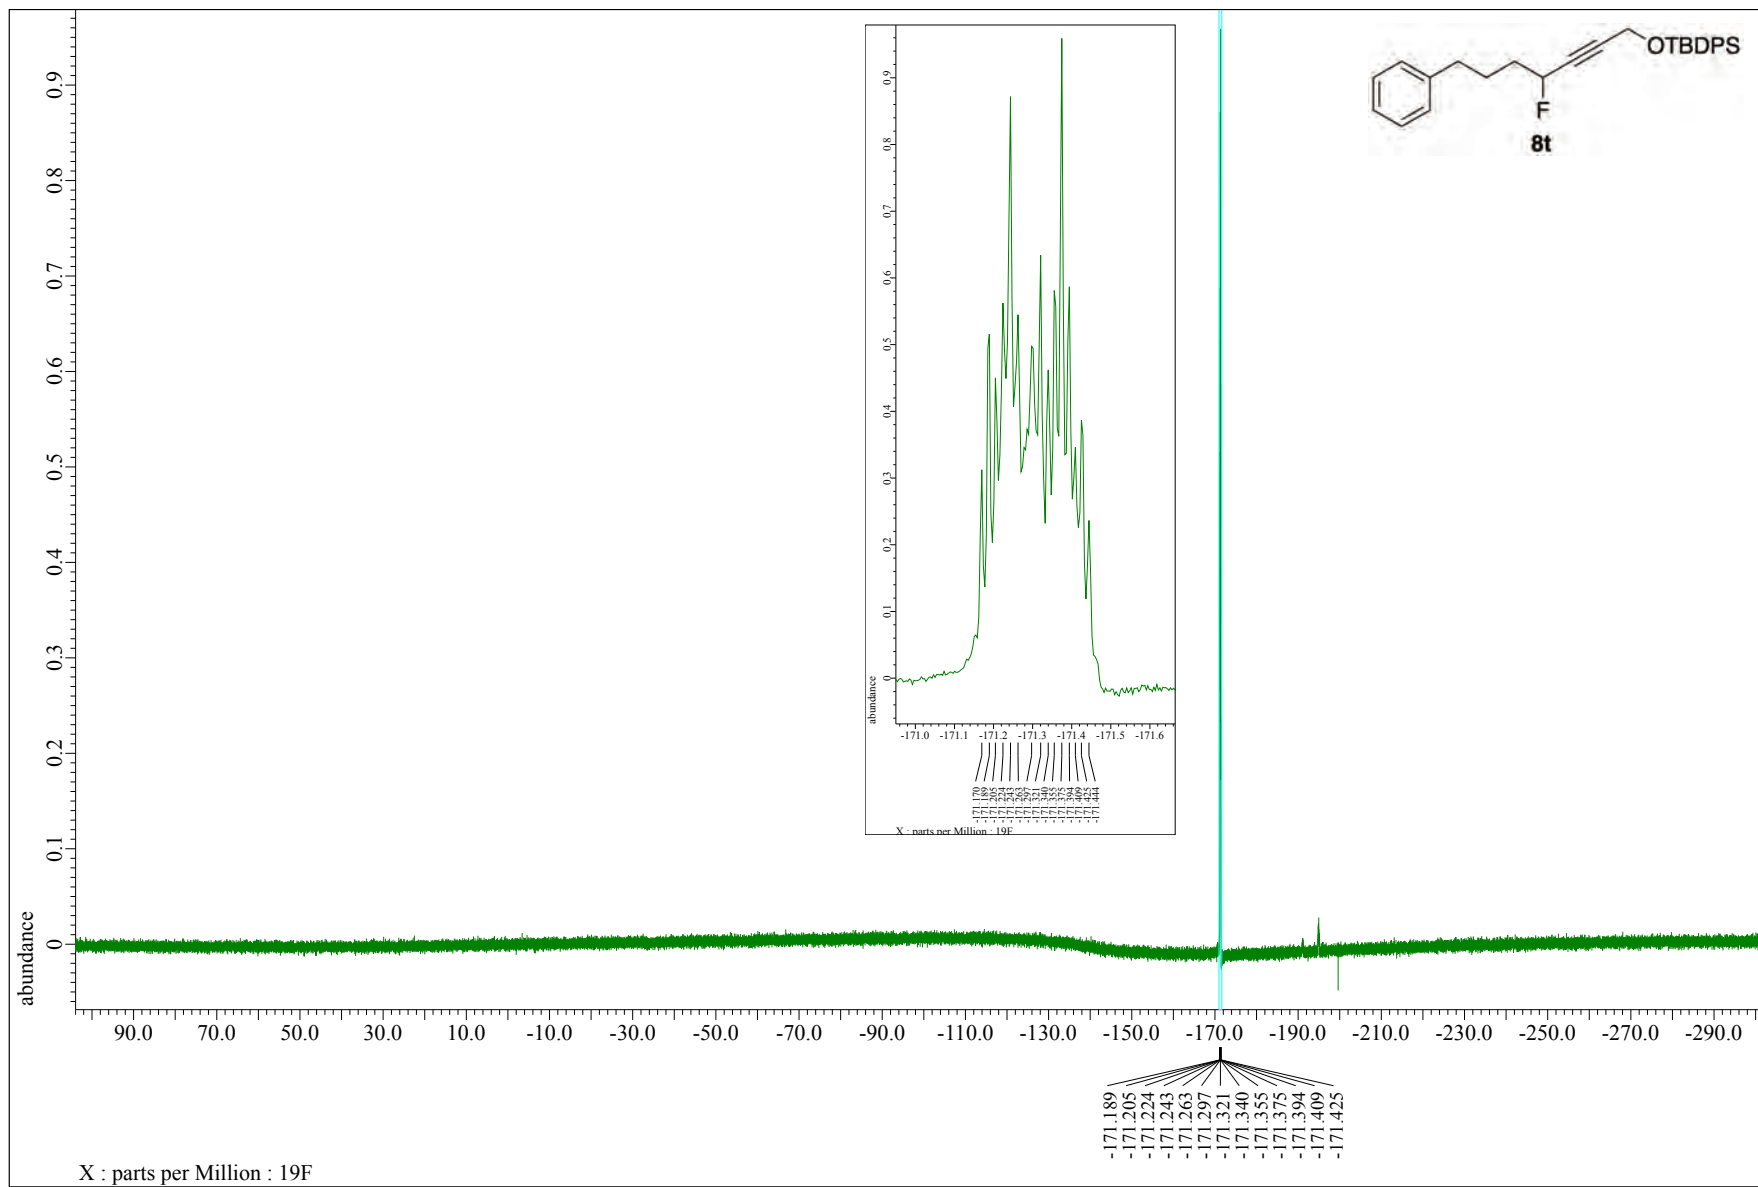

Sample No. : C:\Xcalibur\...\1228\BG\_231849\_8\\_\_

Instrument : Exactive Plus

Mobile phase solvent : MeOH

Operator name : hayashi harumi

Sample solvent : CHCl3

Date : 12/28/23 14:27:00

Instrumental method : C:\Xcalibur\methods\ESI\_100ul\S60\_100ul\_mz150\_2000pn.meth

Instrumental Analysis Division, Global Facility Center, Creative Research Institution, Hokkaido University

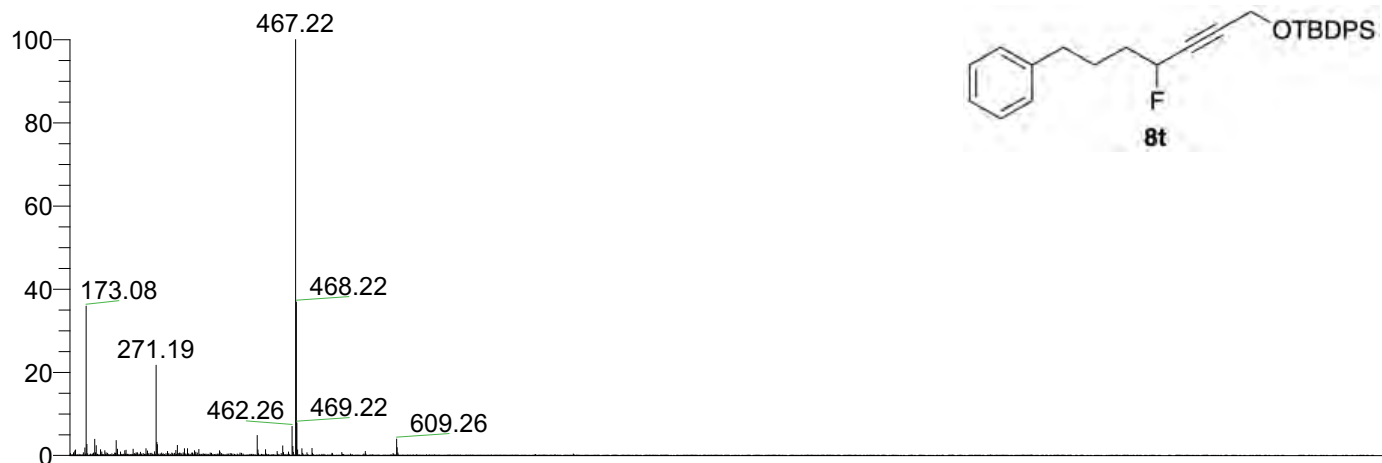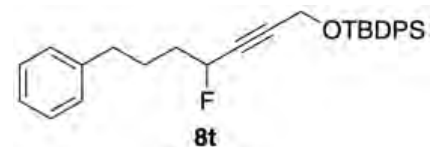

NL: 3.85E7  
BG\_231849\_8t\_pn#18  
-31 RT: 0.31-0.50  
AV: 7 T: FTMS + c  
ESI Full ms  
[150.00-2000.00]

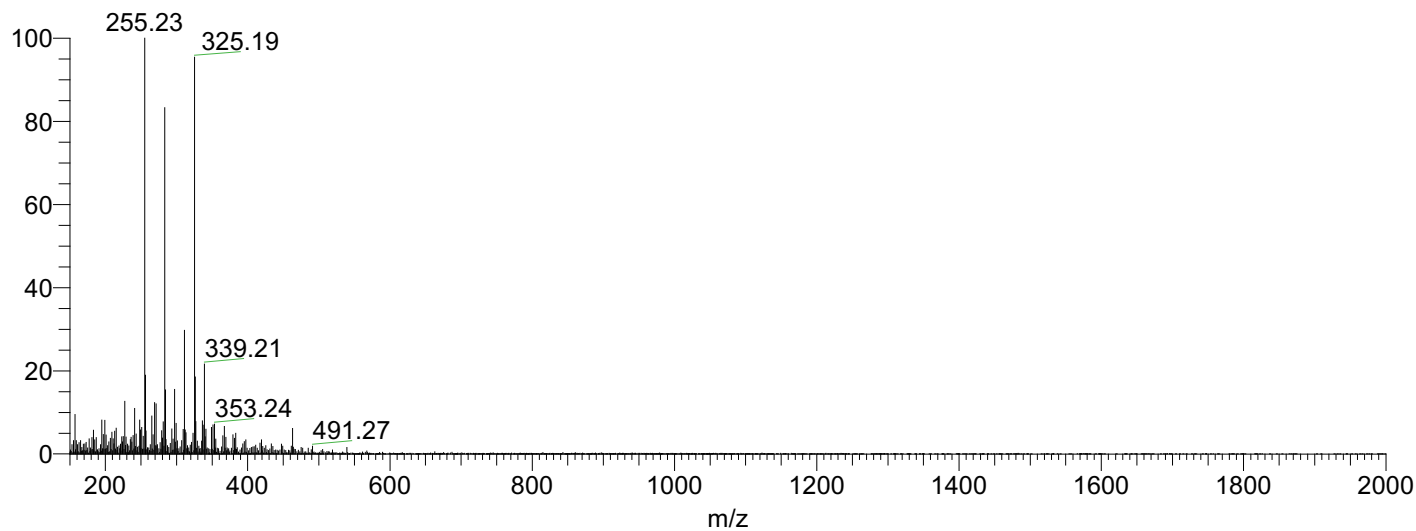

NL: 1.92E6  
BG\_231849\_8t\_pn#18  
-31 RT: 0.30-0.48  
AV: 7 T: FTMS - c ESI  
Full ms  
[150.00-2000.00]

Sample No. : C:\Xcalibur\...20231211\228\231849\_8t\_pn

Instrument : Exactive Plus

Mobile phase solvent : MeOH

Operator name : hayashi harumi

Sample solvent : CHCl3

Date : 12/28/23 11:31:19

Instrumental method : C:\Xcalibur\methods\ESI\_100u\MS60\_100ul\_mz150\_2000pn.meth

Instrumental Analysis Division, Global Facility Center, Creative Research Institution, Hokkaido University

231849\_8t\_pn #21-25 RT: 0.34-0.40 AV: 3 NL: 1.25E7

T: FTMS + p ESI Full ms [150.0000-2000.0000]

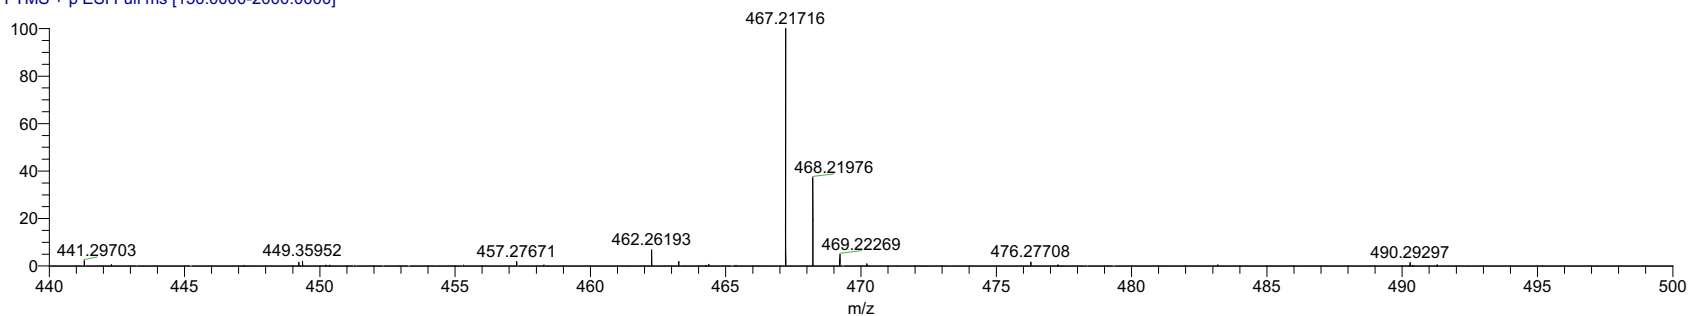

231849\_8t\_pn #25-28 RT: 0.40-0.44 AV: 2 NL: 1.35E7

T: FTMS + p ESI Full ms [150.0000-2000.0000]

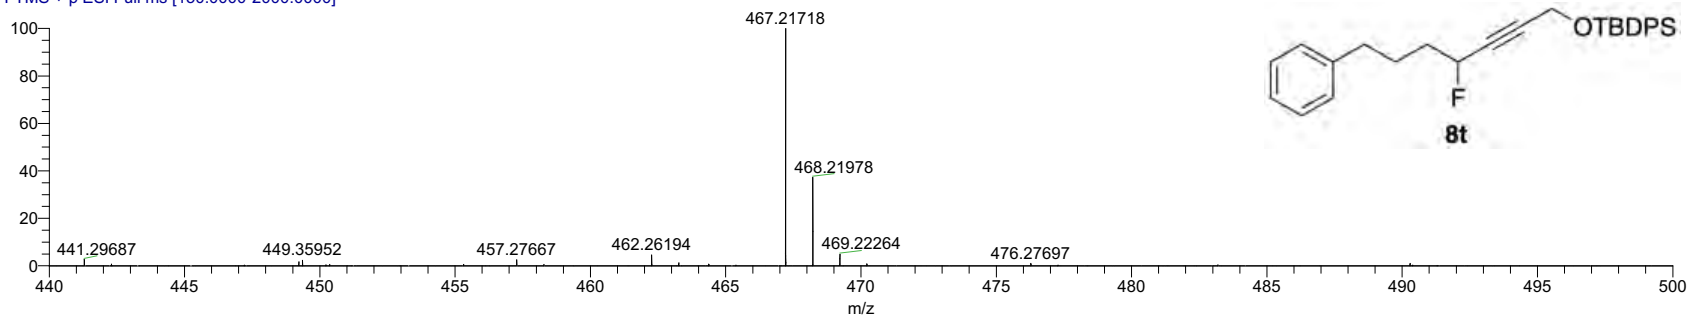

231849\_8t\_pn #29-32 RT: 0.47-0.50 AV: 2 NL: 7.21E6

T: FTMS + p ESI Full ms [150.0000-2000.0000]

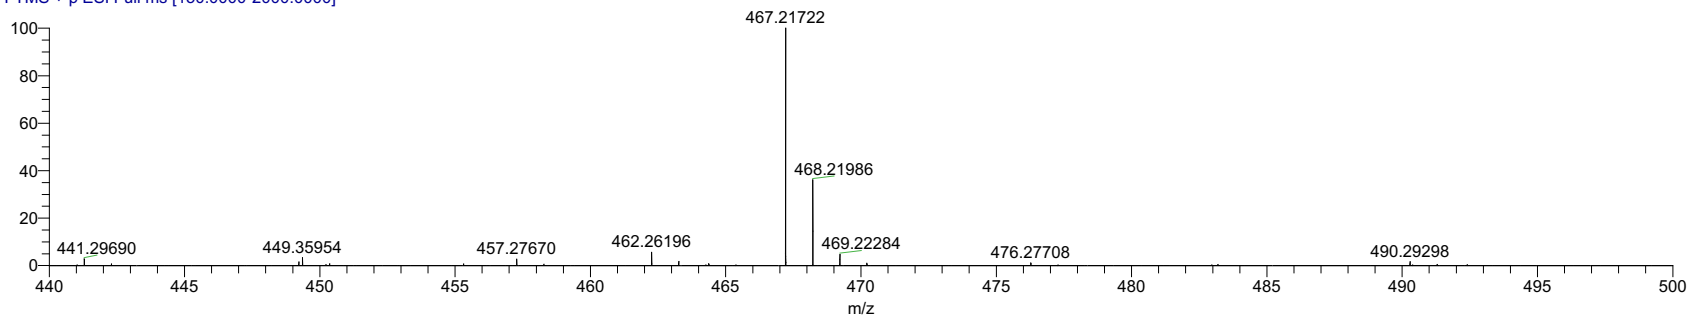

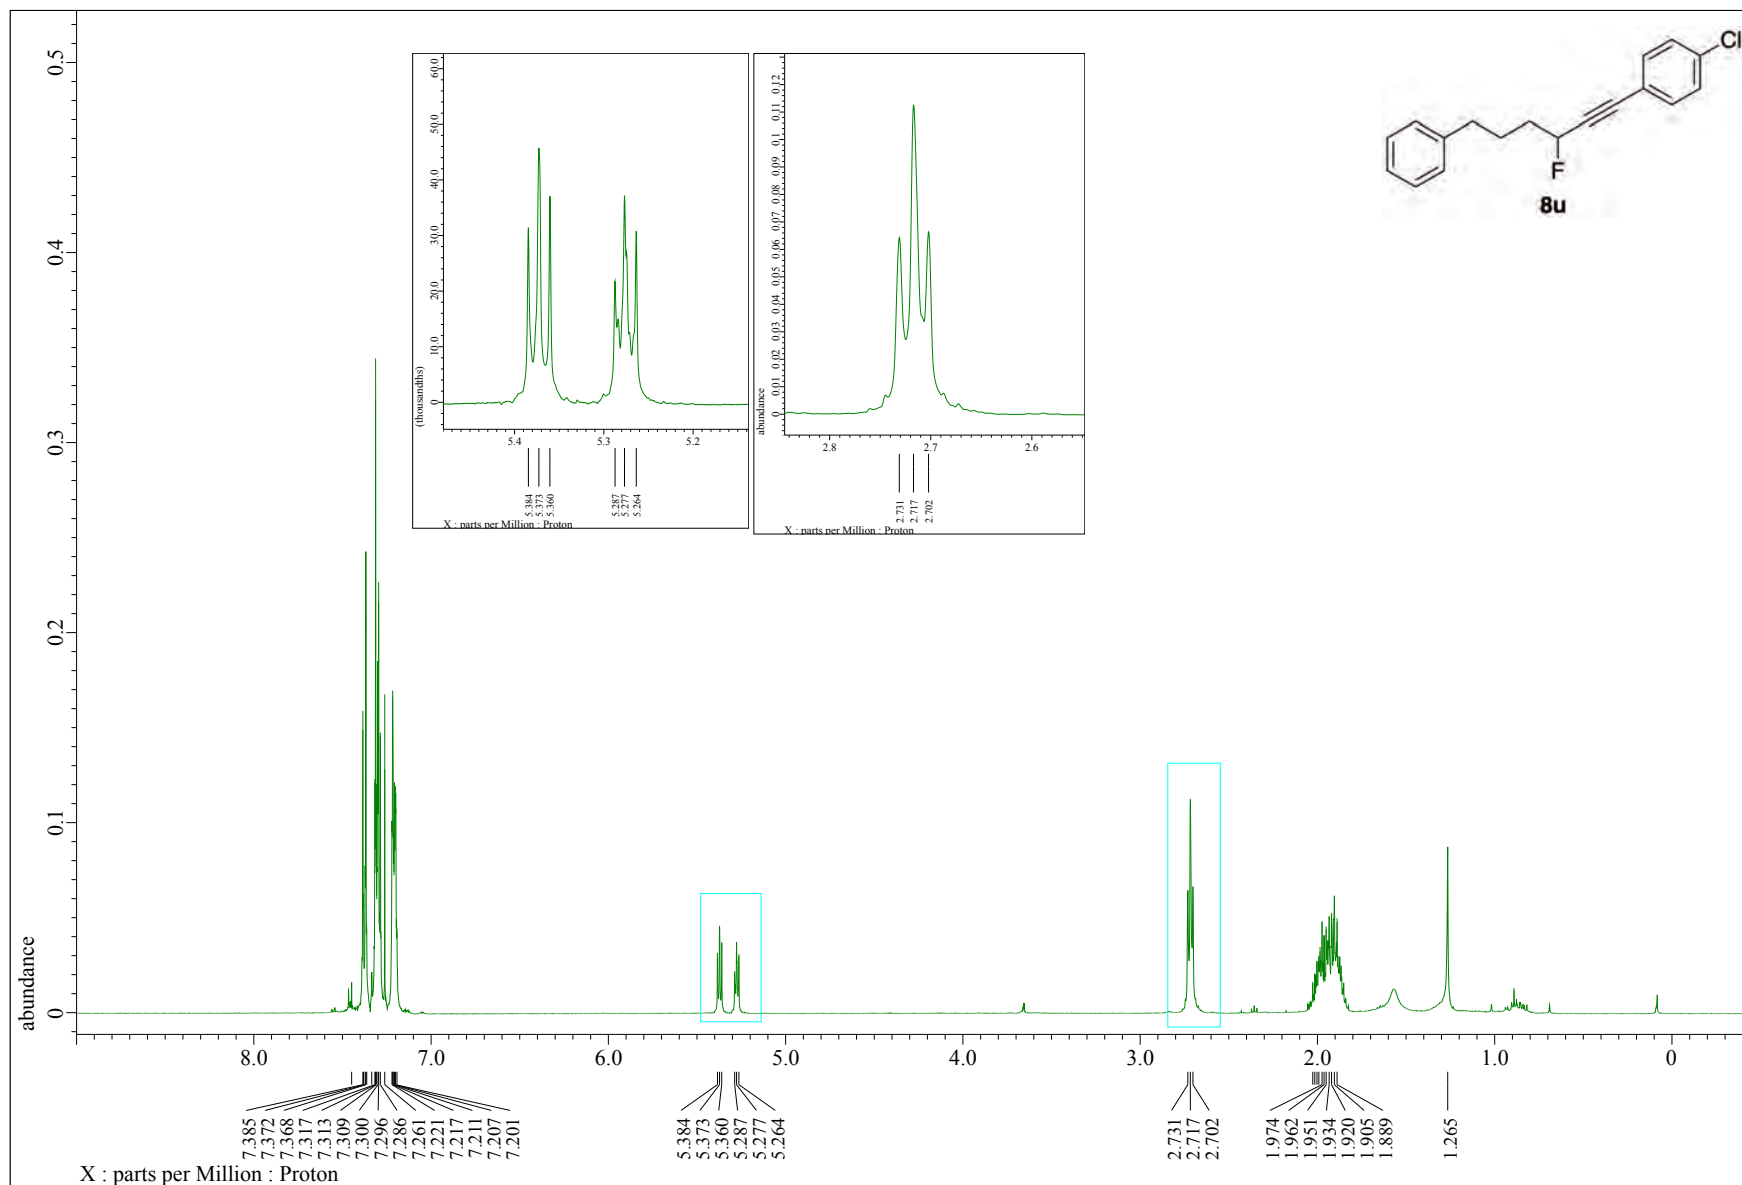

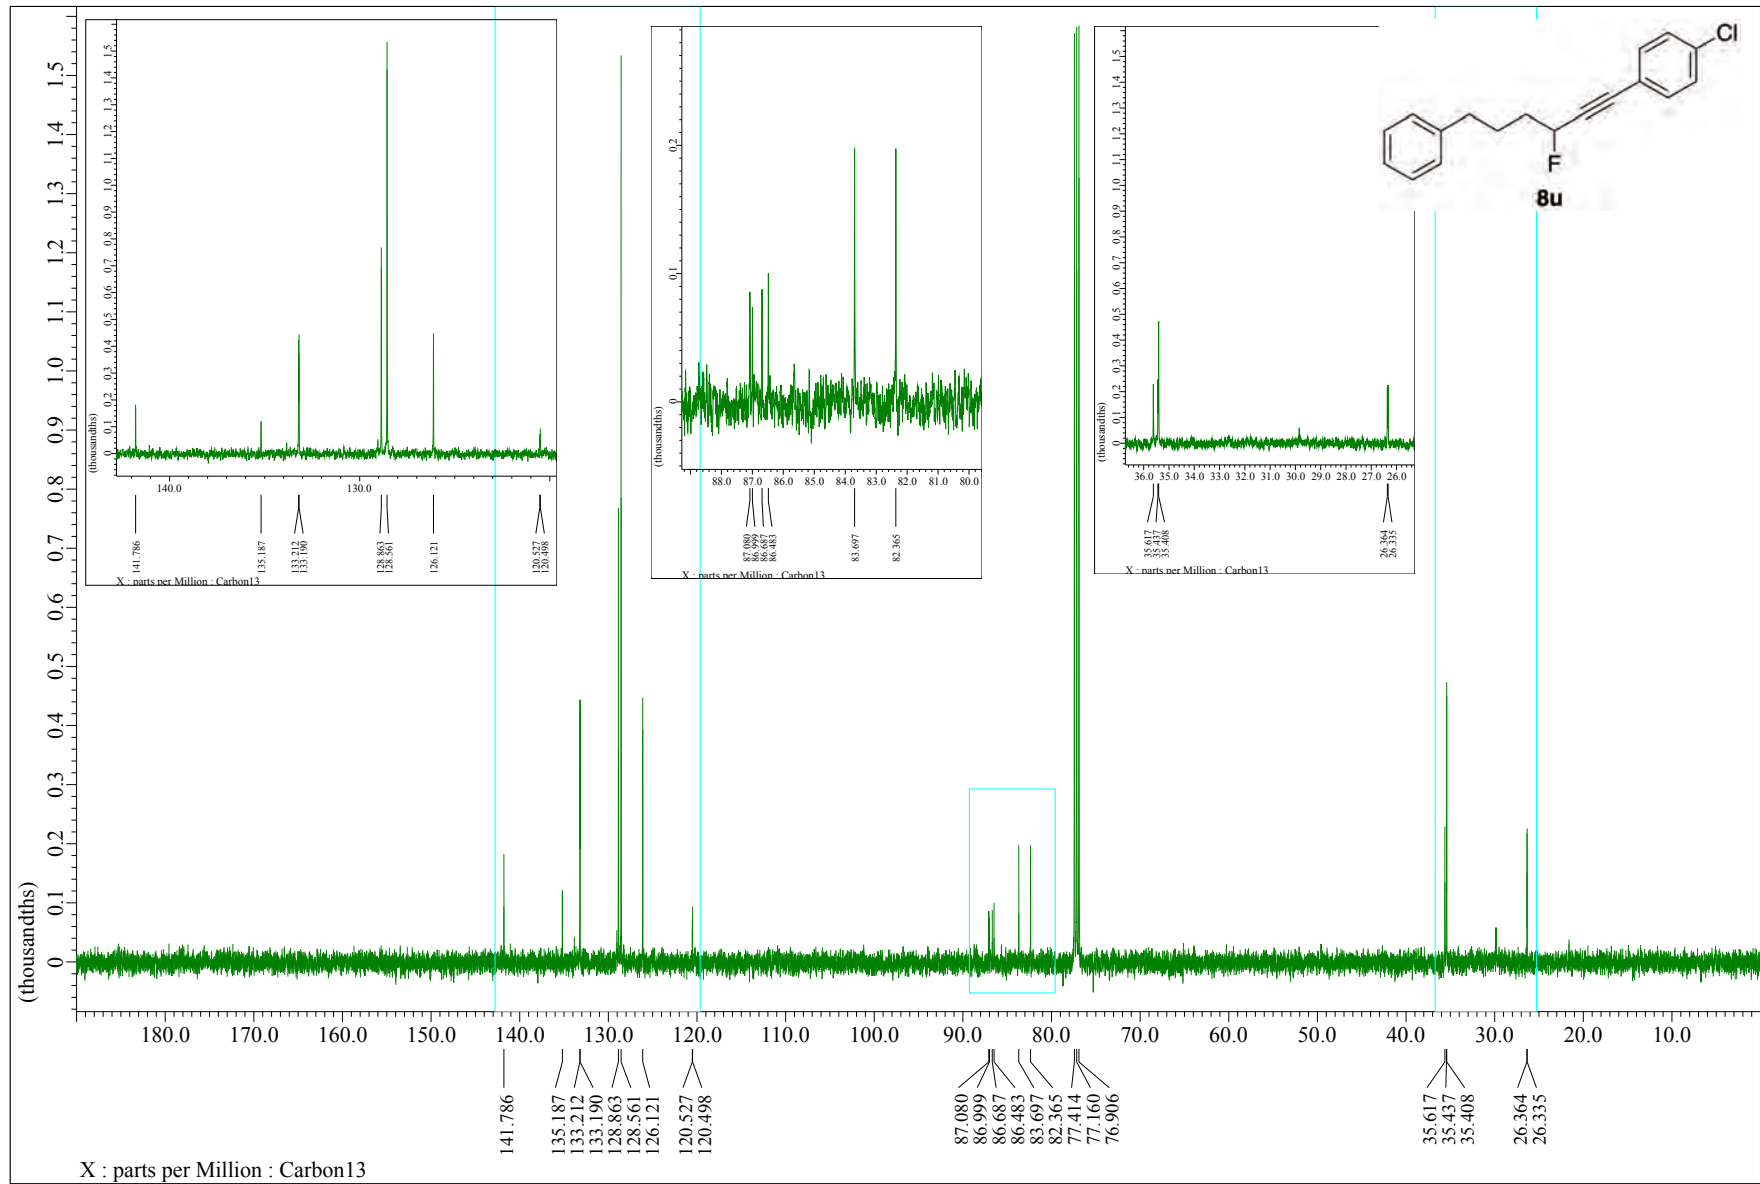

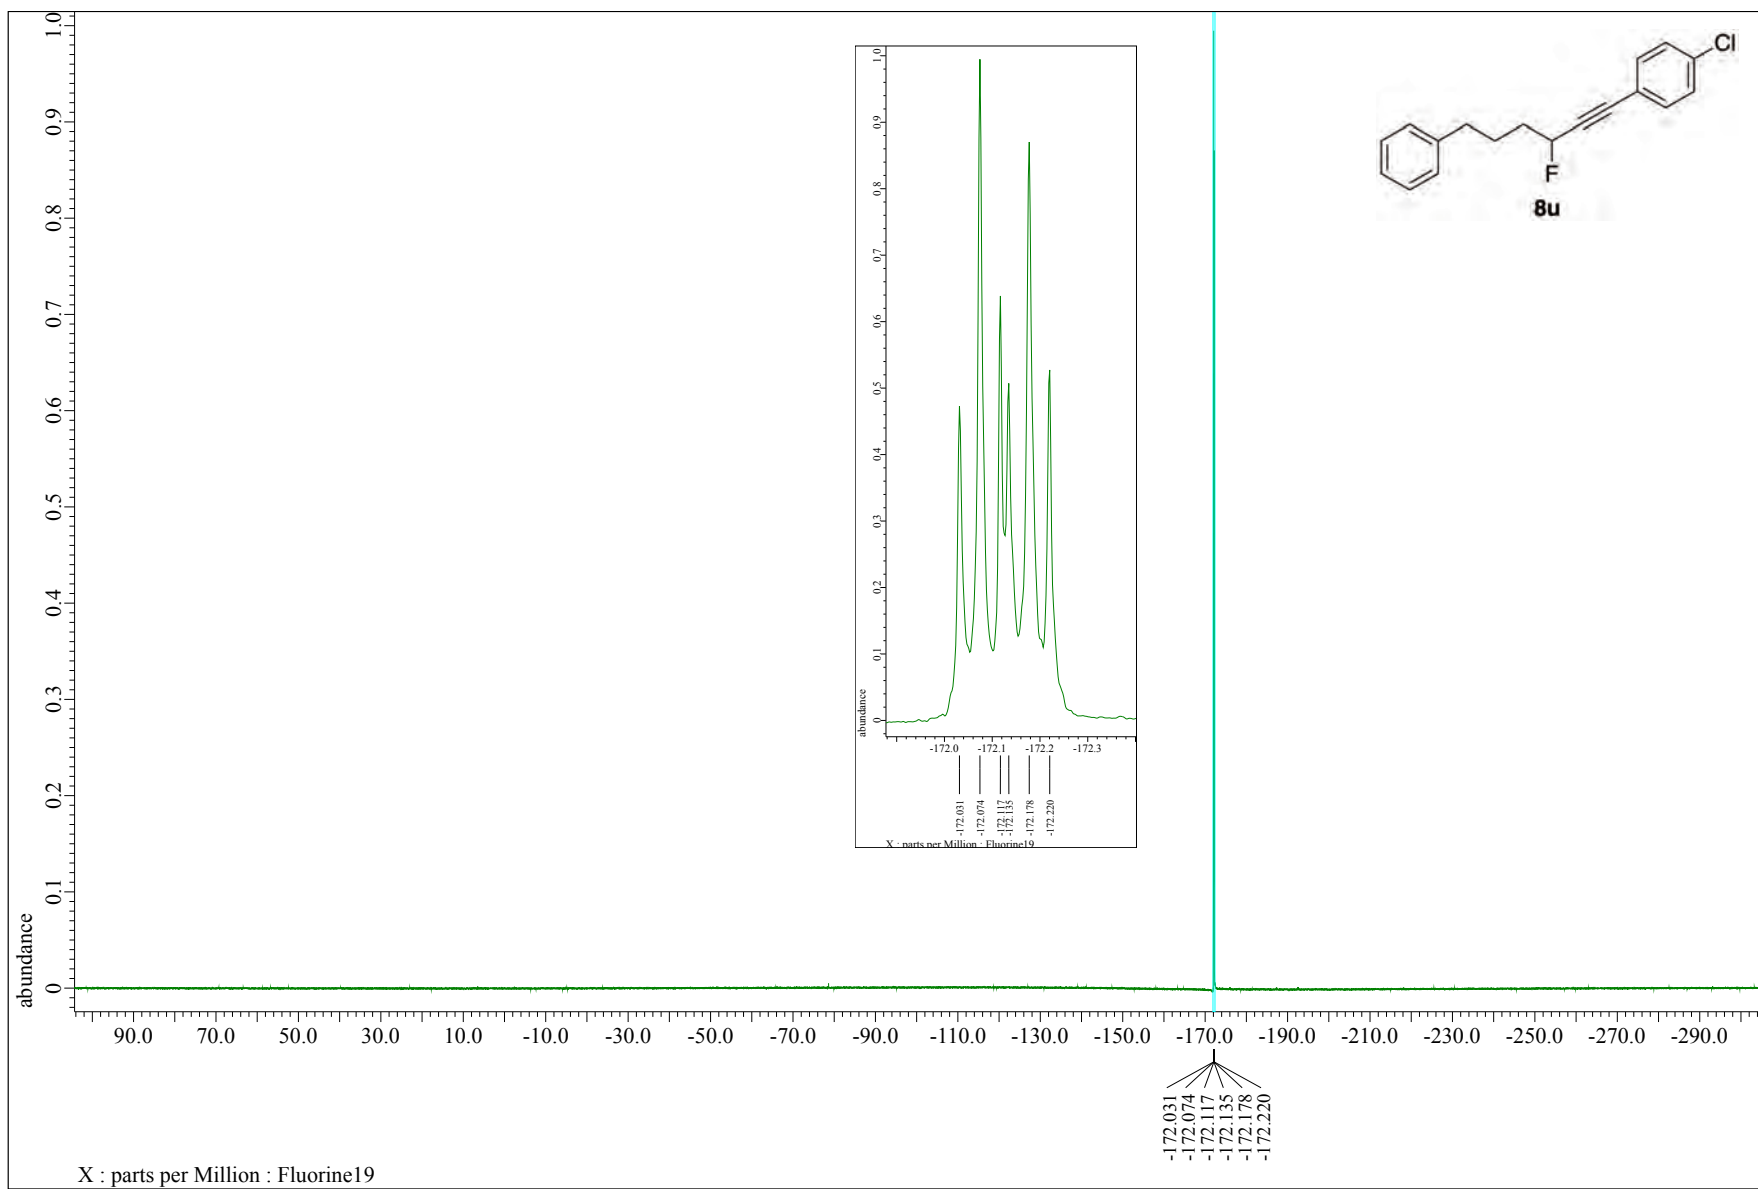

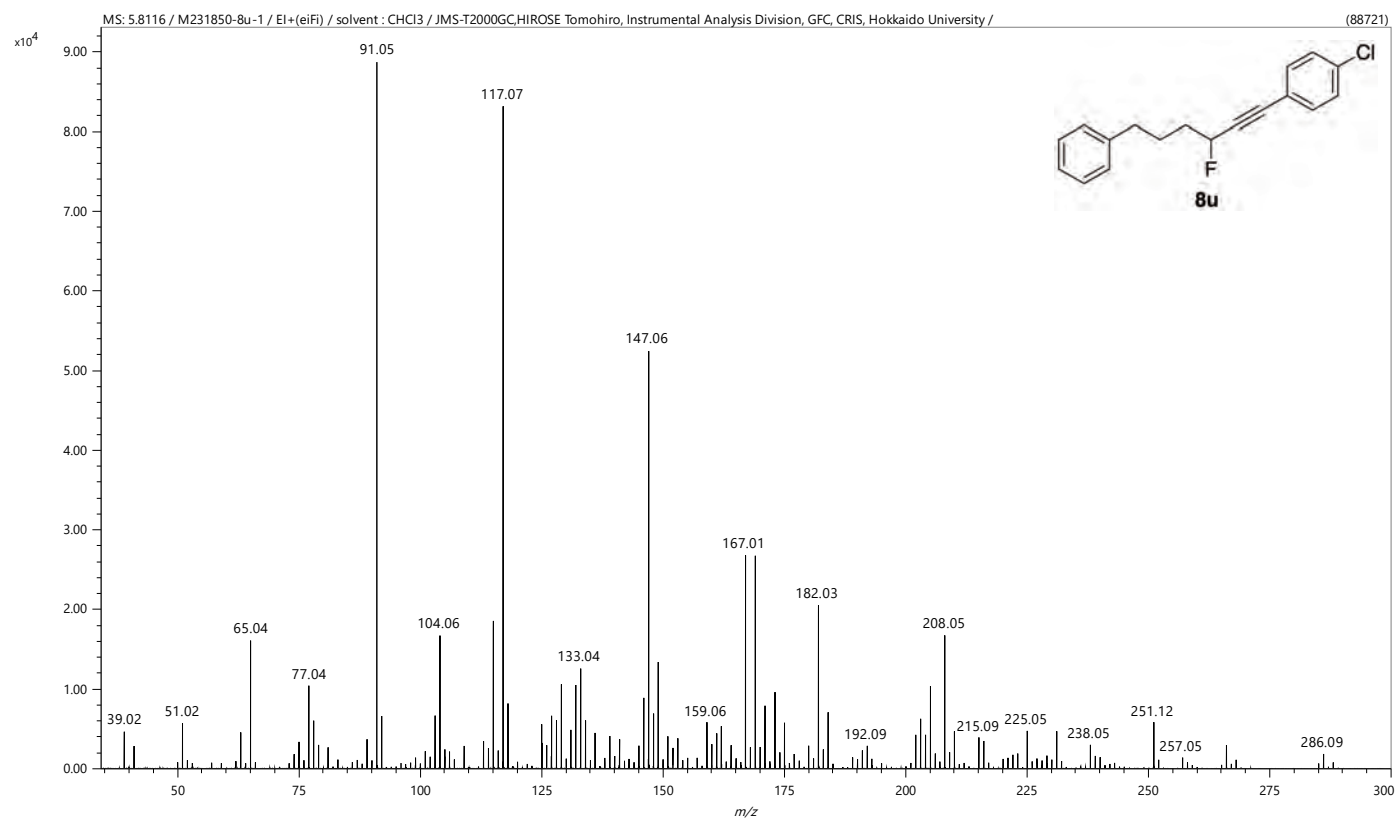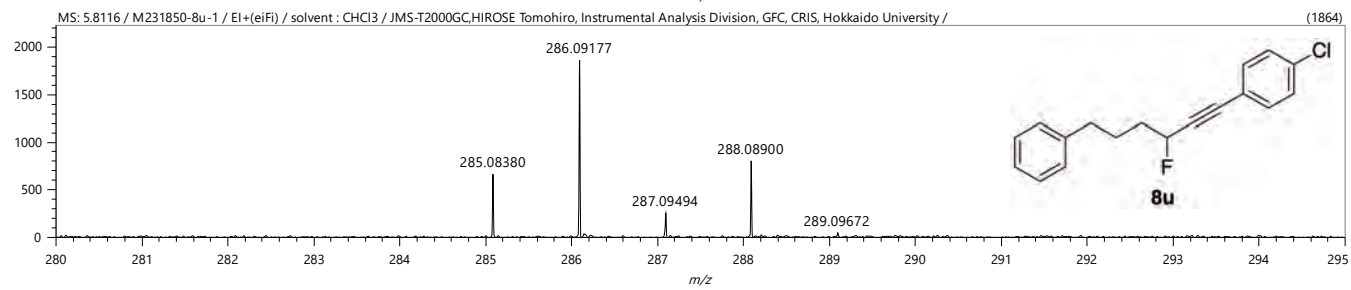



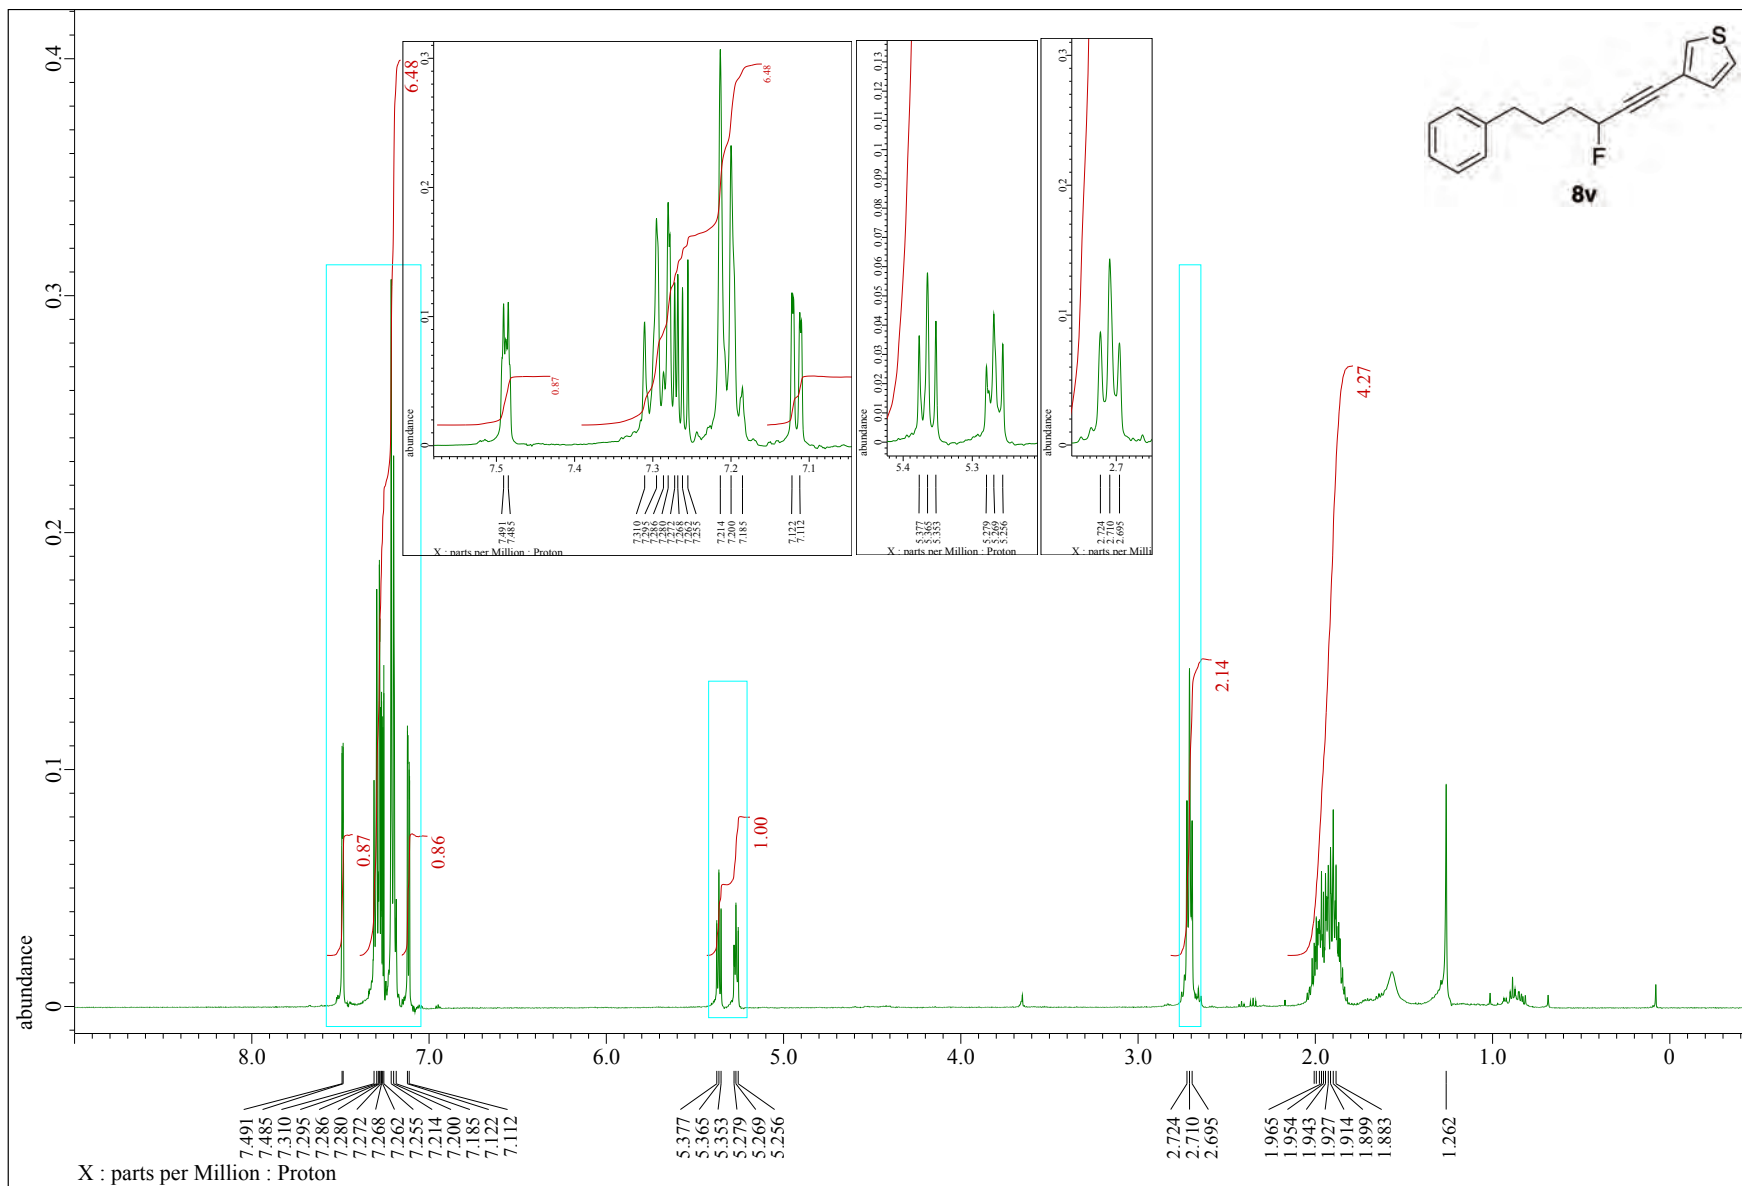

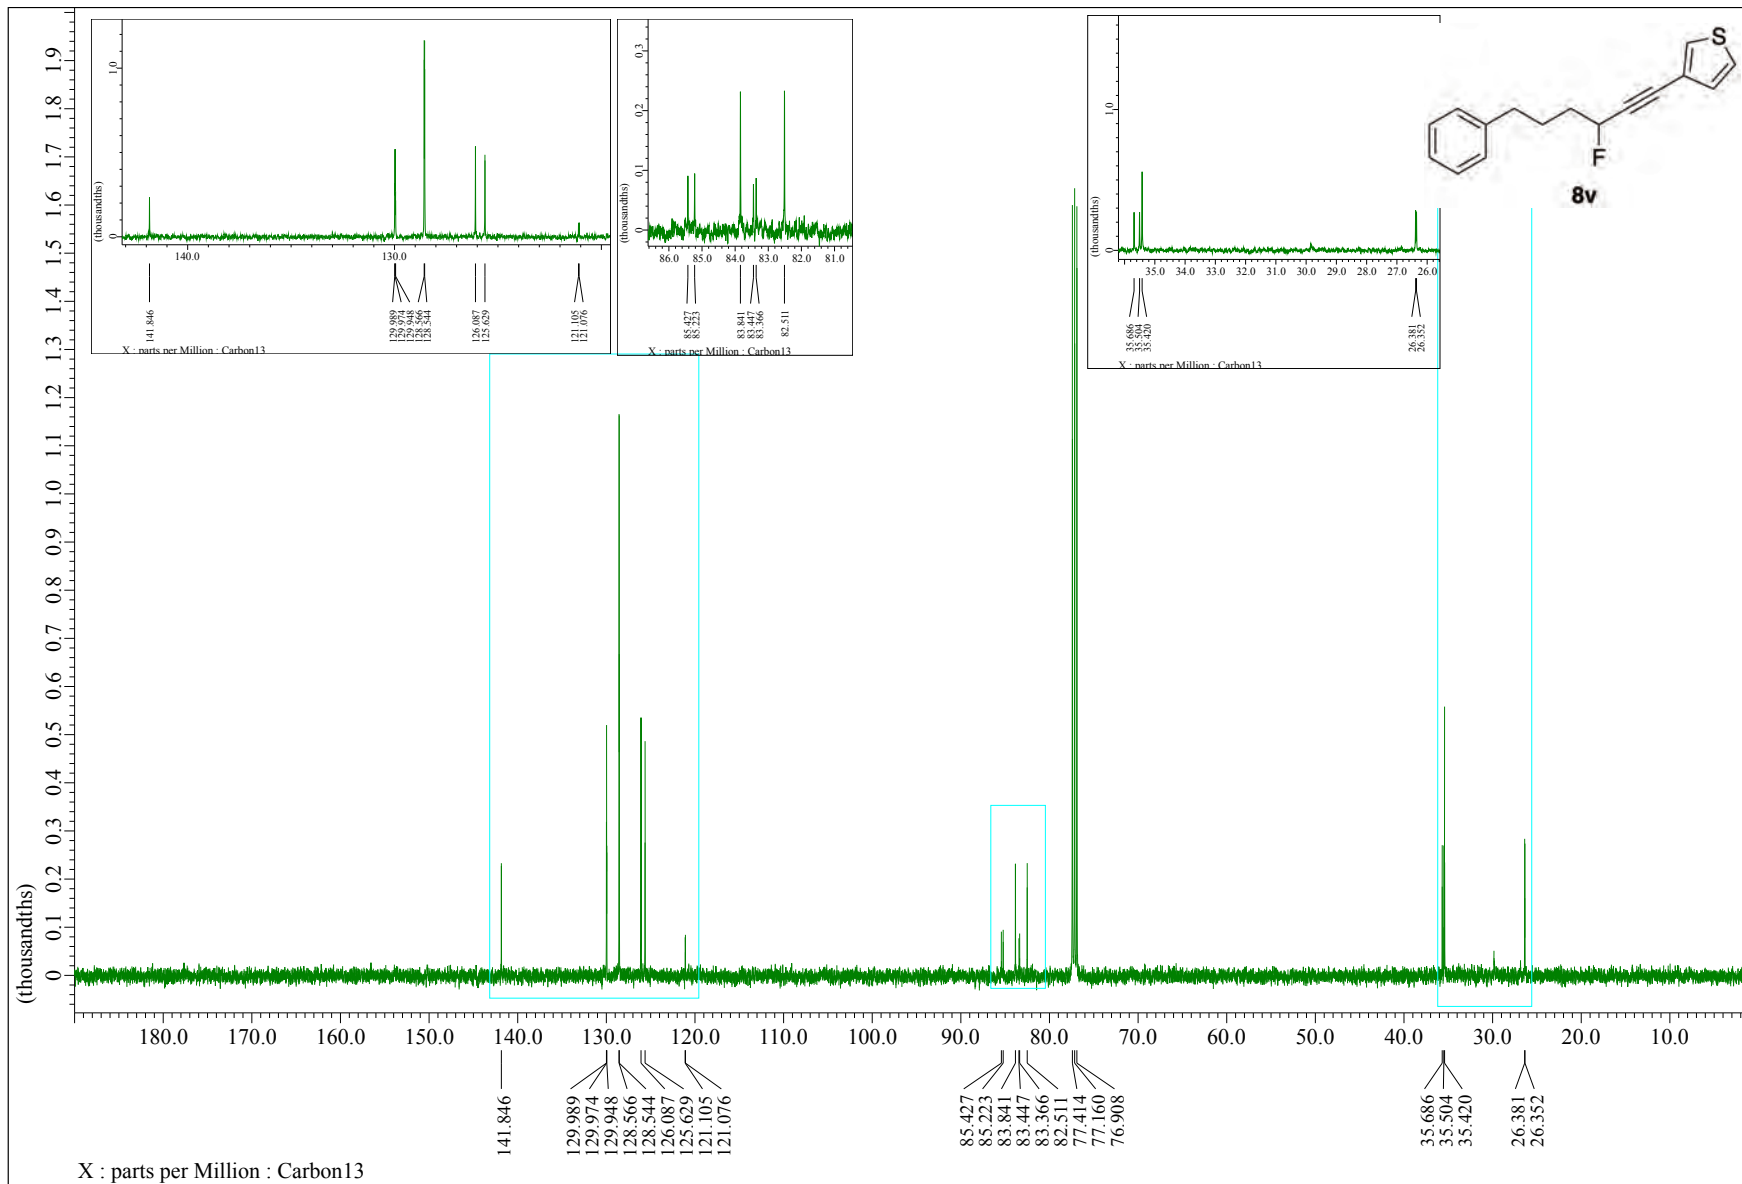

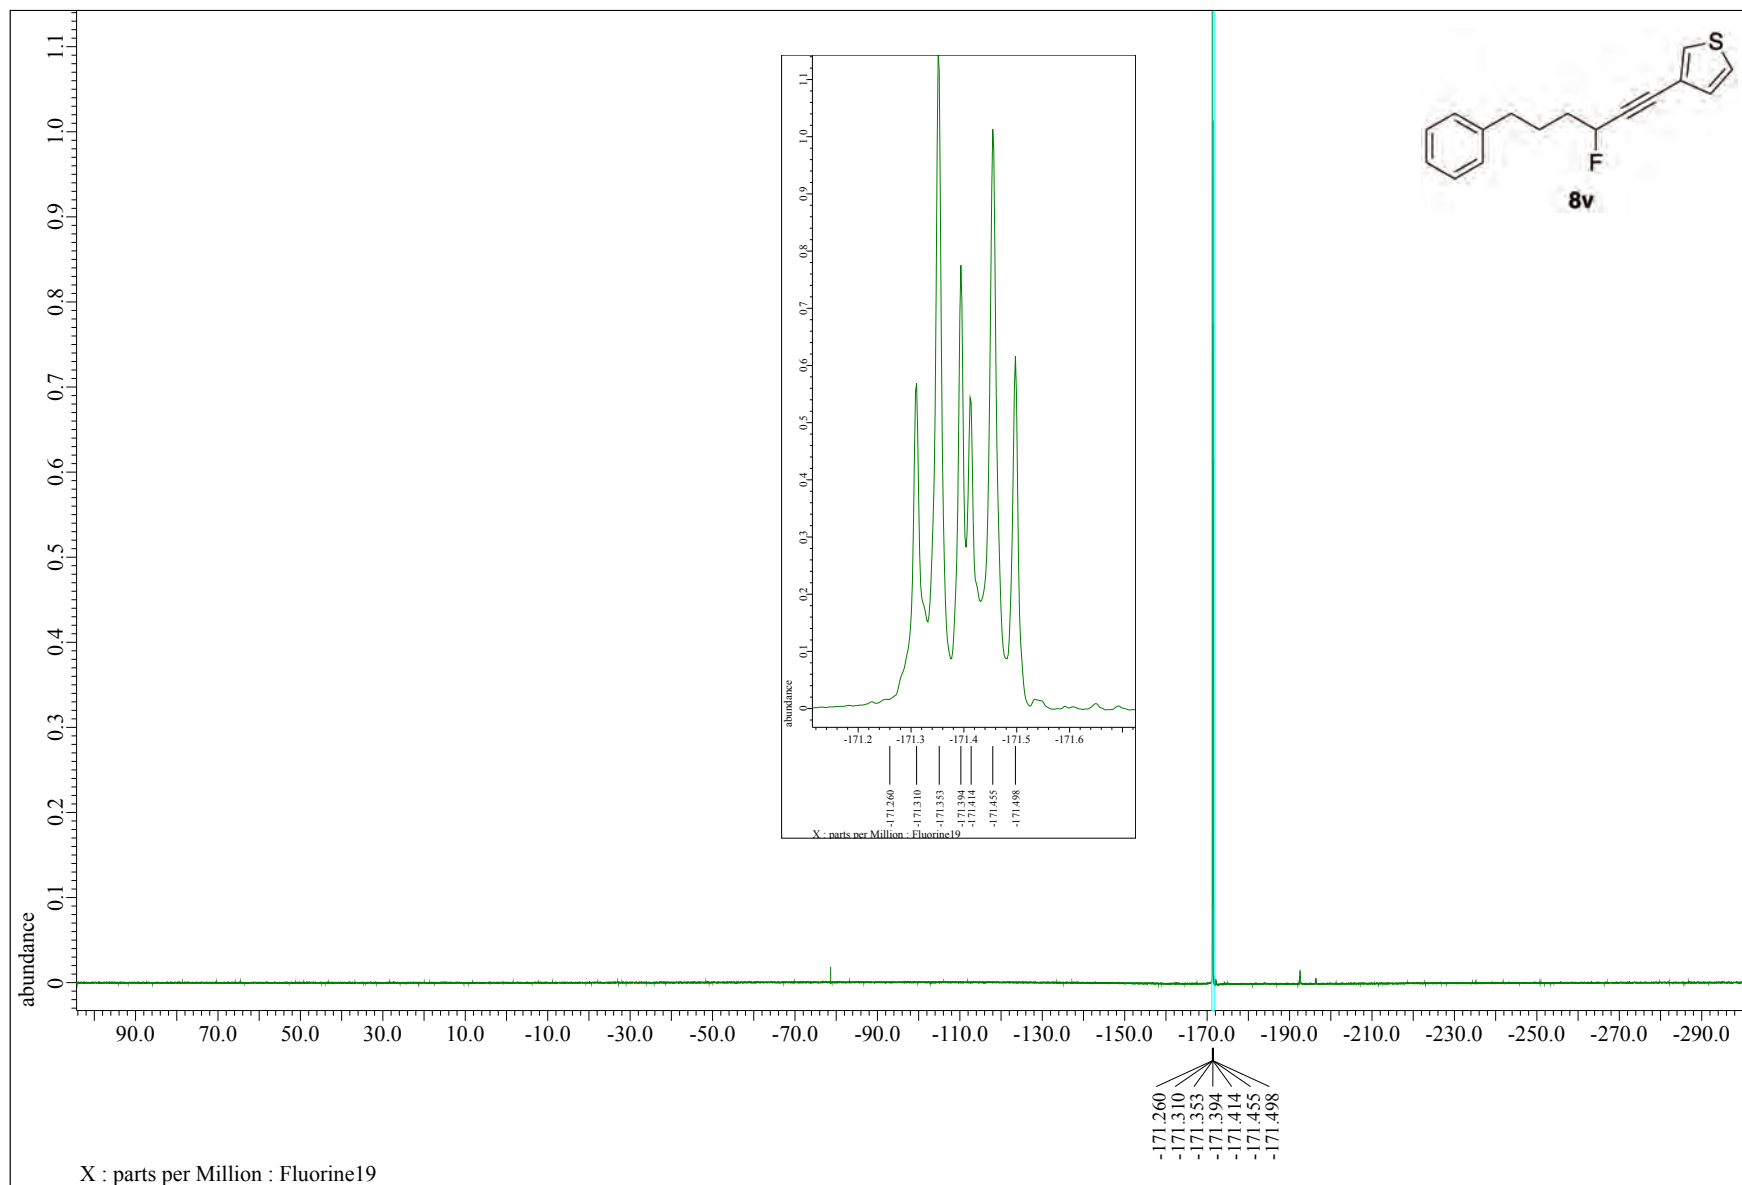

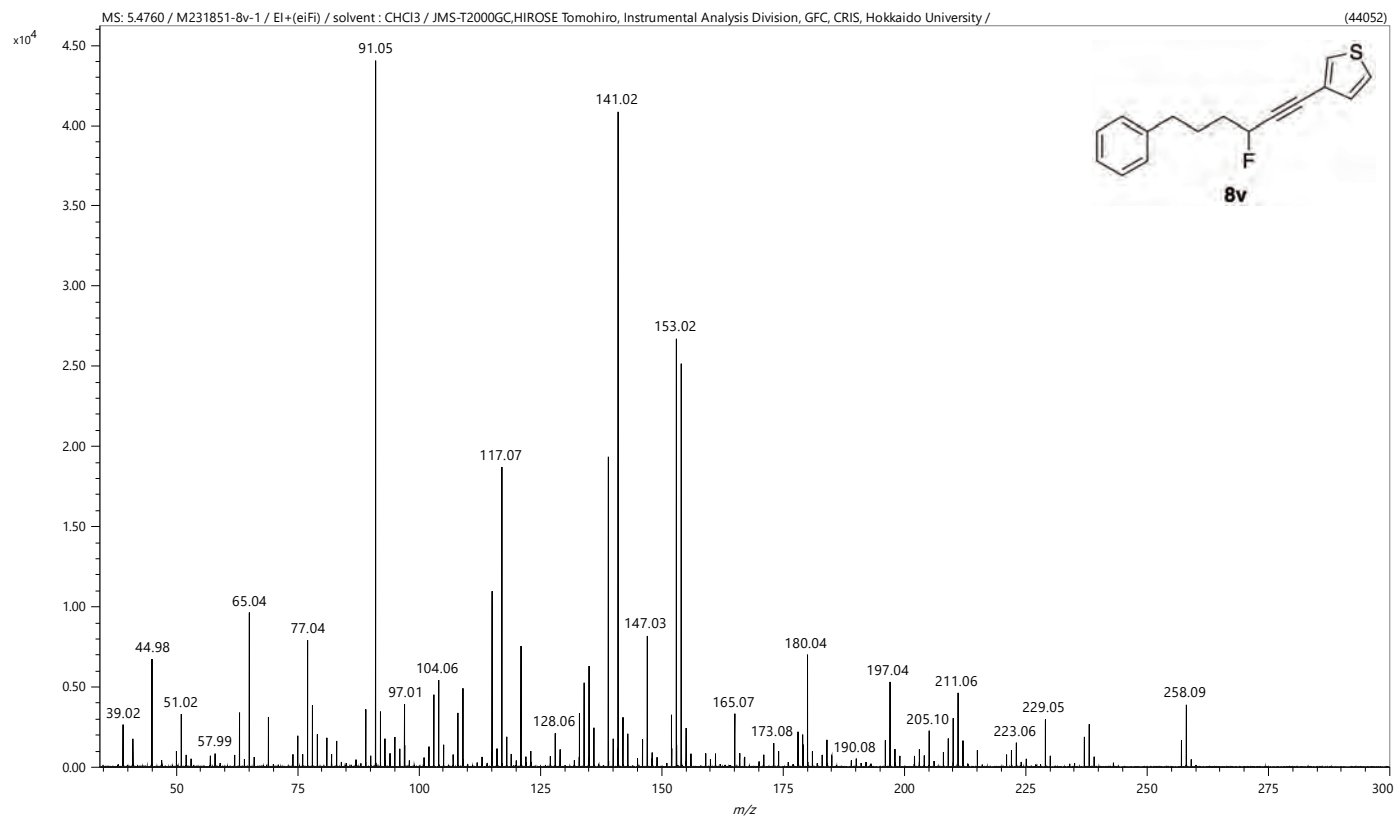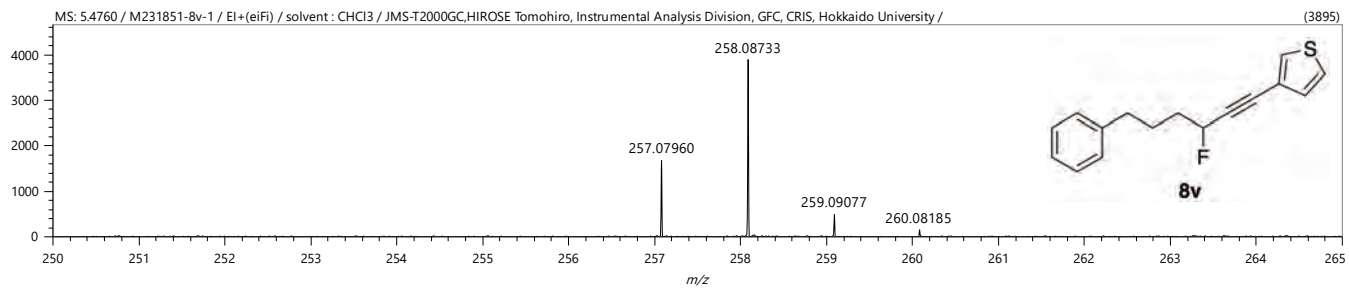

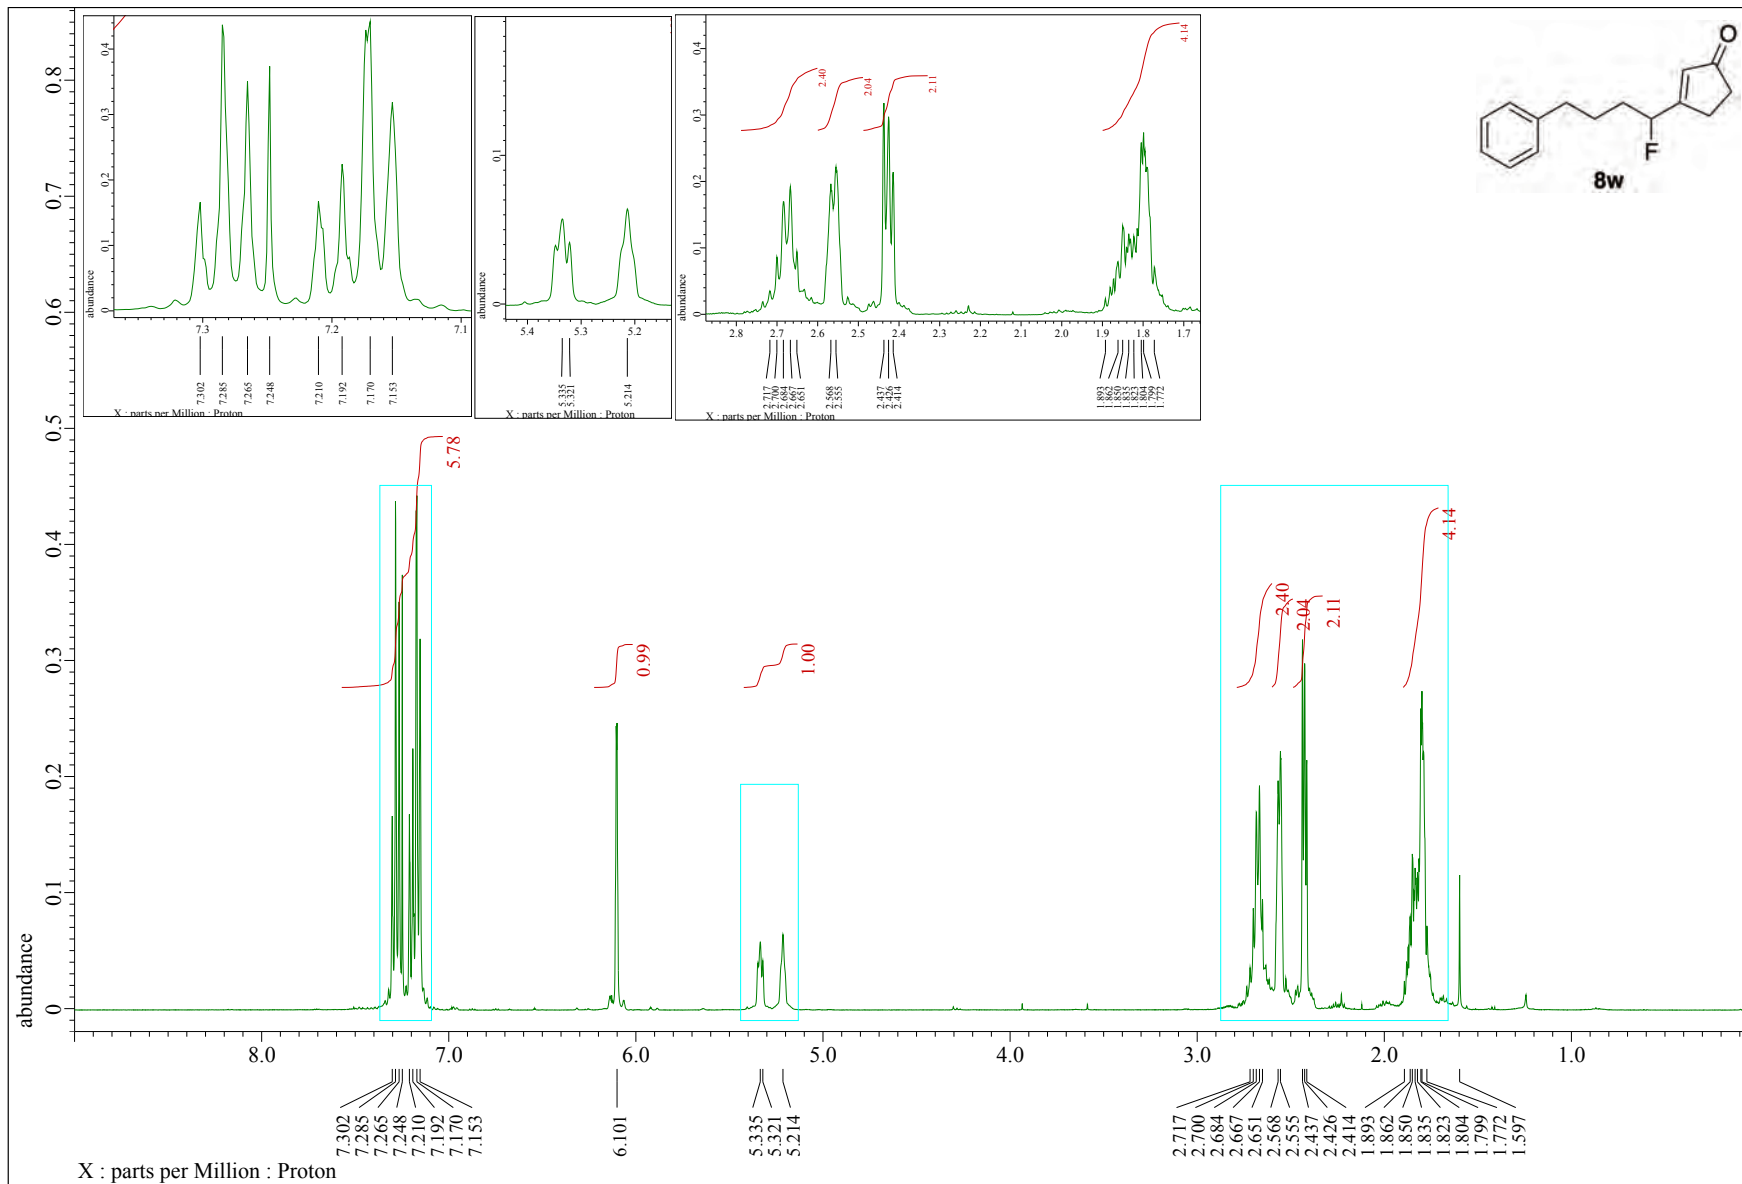

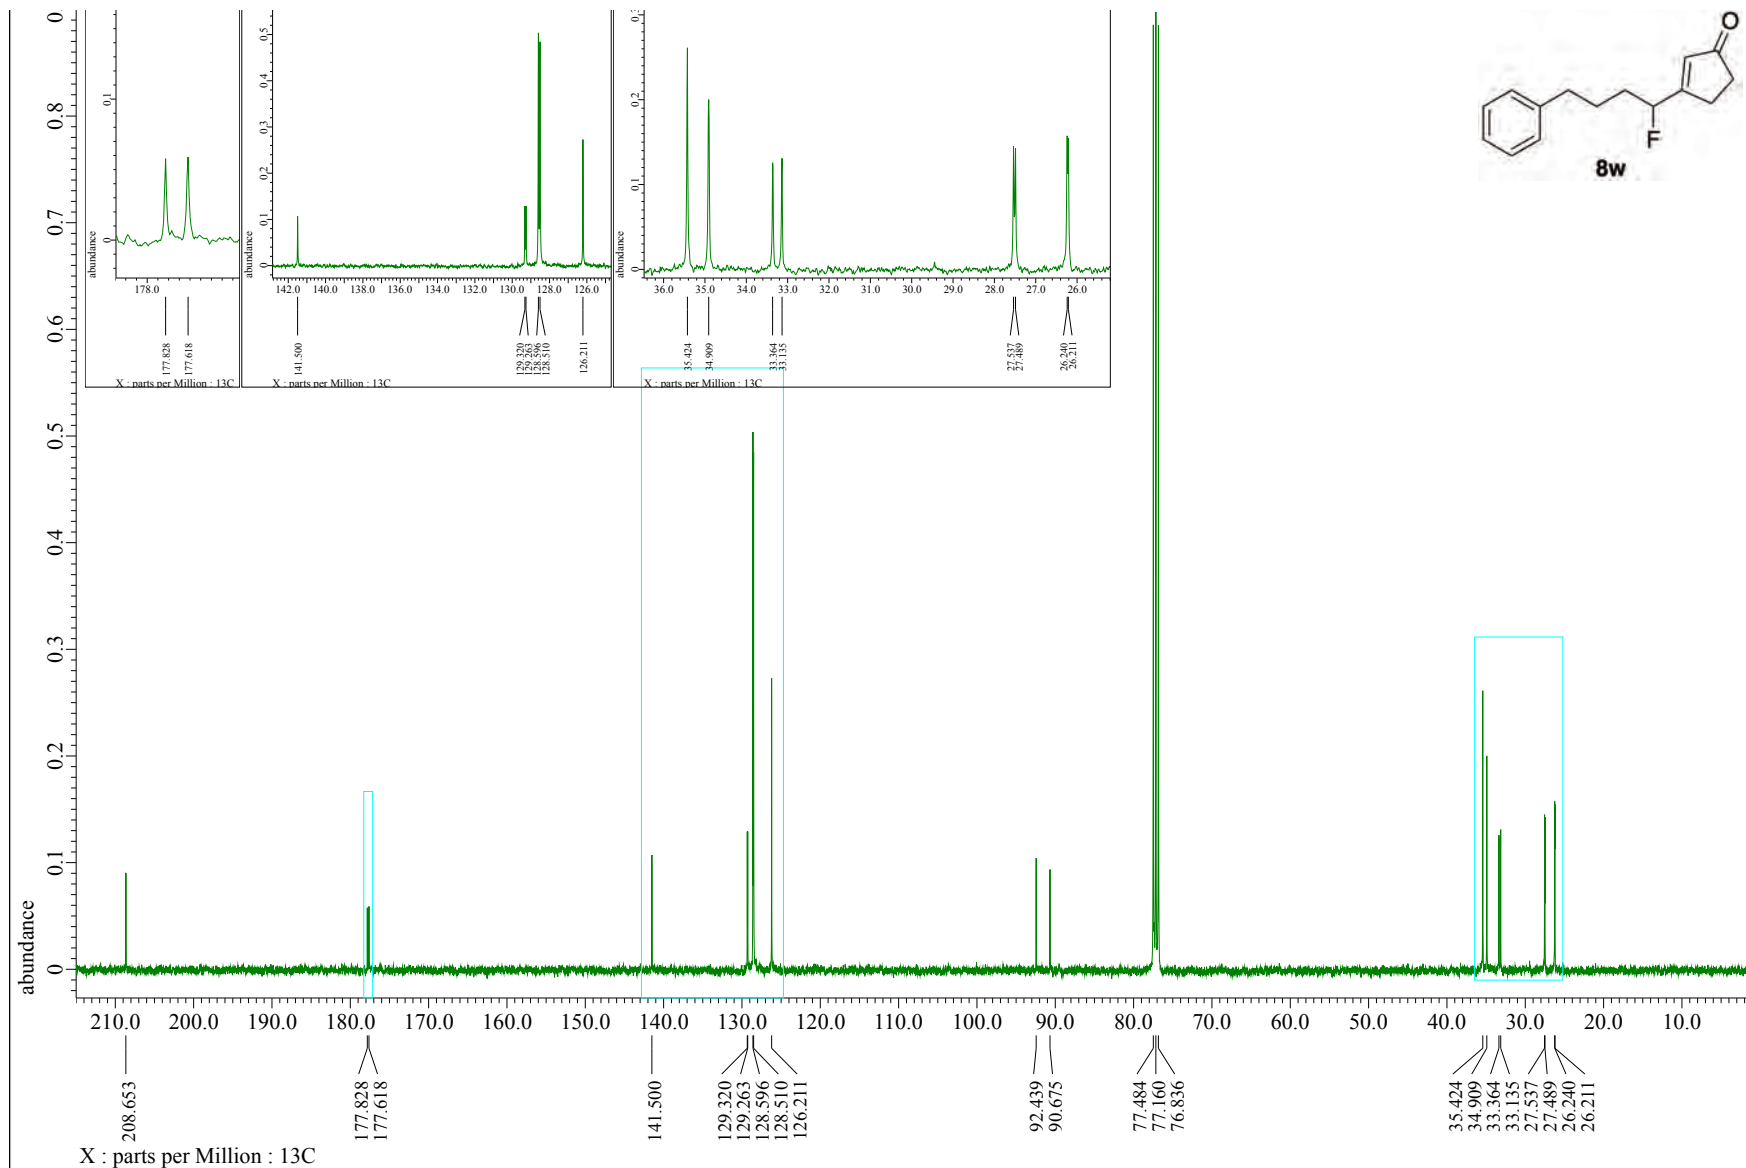

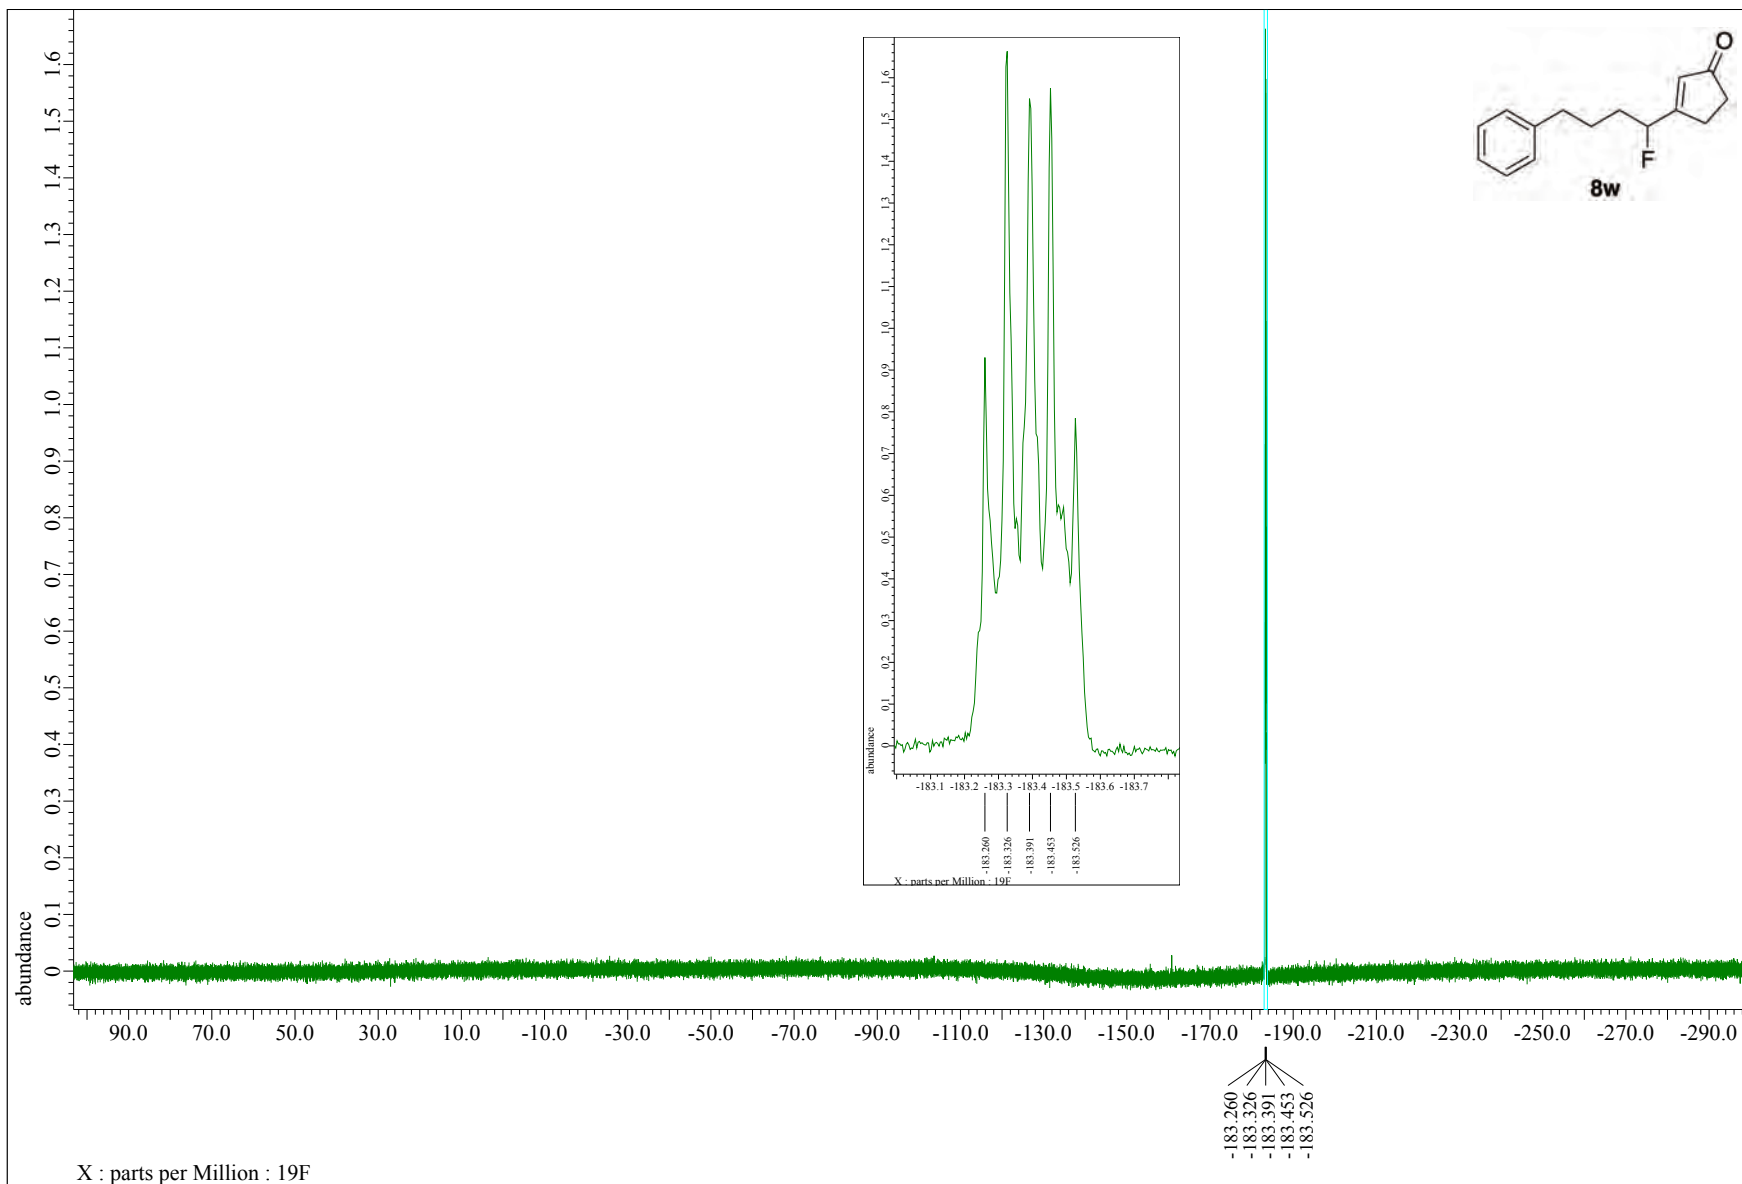

Sample No. : C:\Xcalibur\...0517\BG\_230238\_E \_n

Instrument : Exactive Plus

Mobile phase solvent : MeOH

Operator name : hayashi harumi

Sample solvent : CHCl3

Date : 05/17/23 13:40:09

Instrumental method : C:\Xcalibur\methods\ESI\_100ul\S60\_100ul\_mz100\_1500pn.meth

Instrumental Analysis Division, Global Facility Center, Creative Research Institution, Hokkaido University

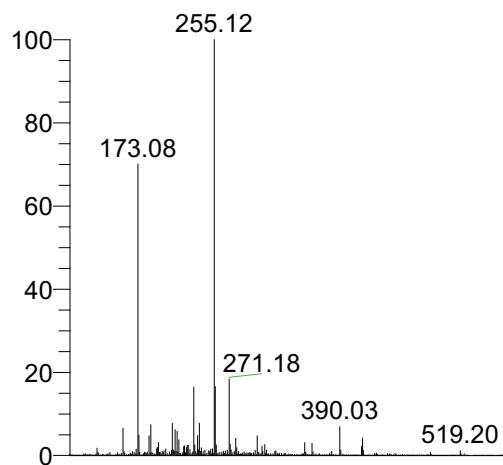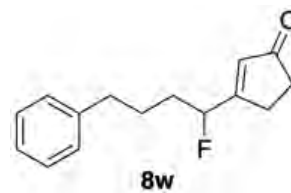

NL: 7.52E7  
BG\_230238\_EK0037\_p  
n#18-32 RT: 0.31-0.49  
AV: 7 T: FTMS + c ESI  
Full ms  
[100.00-1500.00]

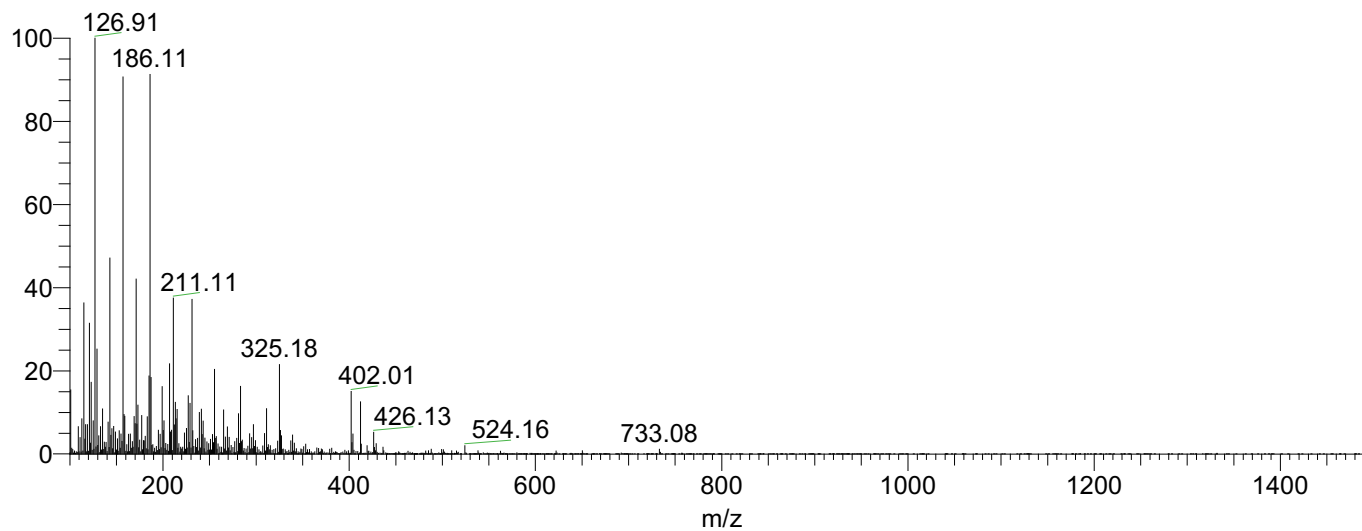

NL: 6.03E6  
BG\_230238\_EK0037\_p  
n#18-32 RT: 0.30-0.50  
AV: 8 T: FTMS - c ESI  
Full ms  
[100.00-1500.00]



Sample No. : C:\Xcalibur\...10517\202308\_EK0037\_pn

Instrument : Exactive Plus

Mobile phase solvent : MeOH

Operator name : hayashi harumi

Sample solvent : CHCl3

Date : 05/17/23 11:39:59

Instrumental method : C:\Xcalibur\methods\ESI\_100ul\S60\_100ul\_mz100\_1500pn.meth

Instrumental Analysis Division, Global Facility Center, Creative Research Institution, Hokkaido University

230238\_EK0037\_pn #22-25 RT: 0.37-0.40 AV: 2 NL: 2.55E7

T: FTMS + p ESI Full ms [100.0000-1500.0000]

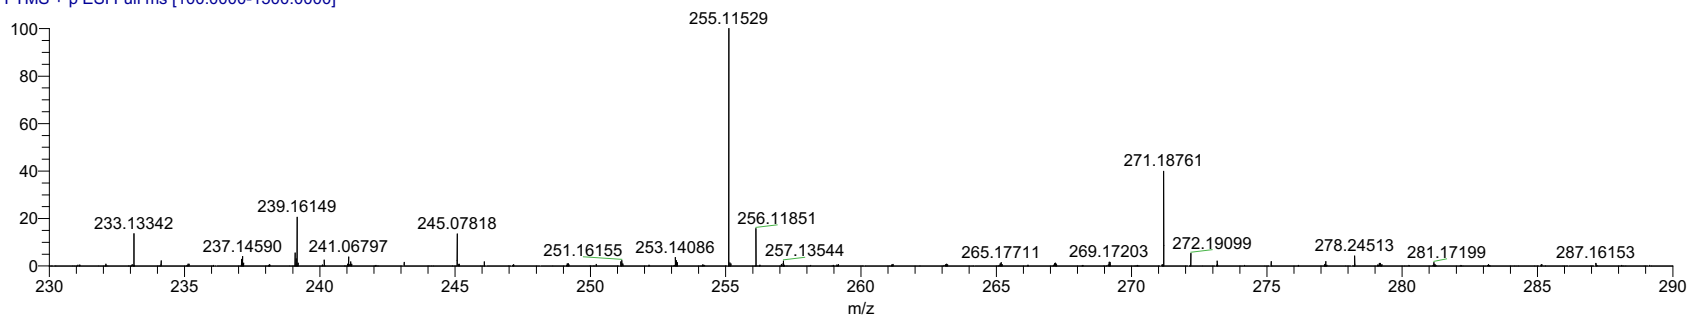

230238\_EK0037\_pn #25-28 RT: 0.40-0.43 AV: 2 NL: 2.72E7

T: FTMS + p ESI Full ms [100.0000-1500.0000]

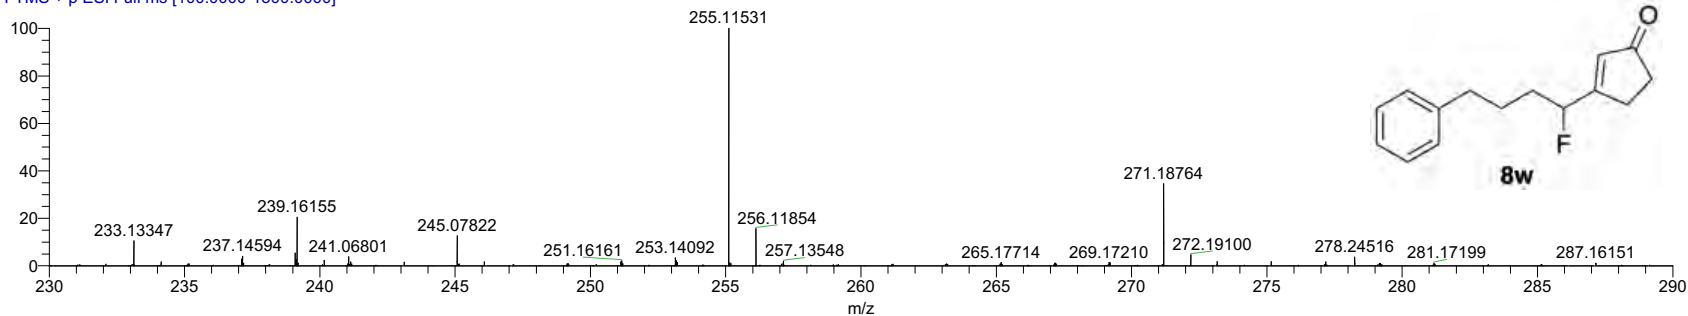

230238\_EK0037\_pn #28-32 RT: 0.46-0.49 AV: 2 NL: 1.82E7

T: FTMS + p ESI Full ms [100.0000-1500.0000]

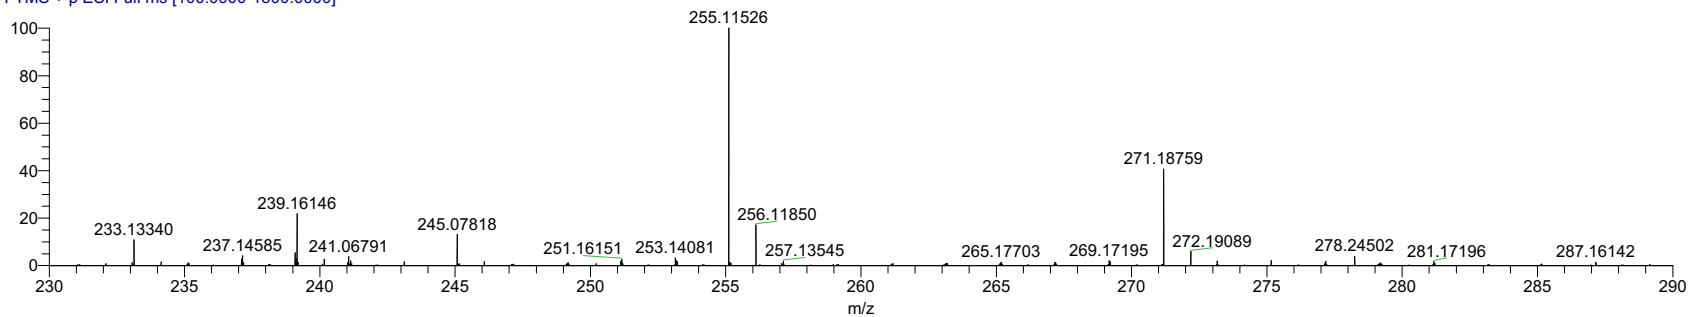

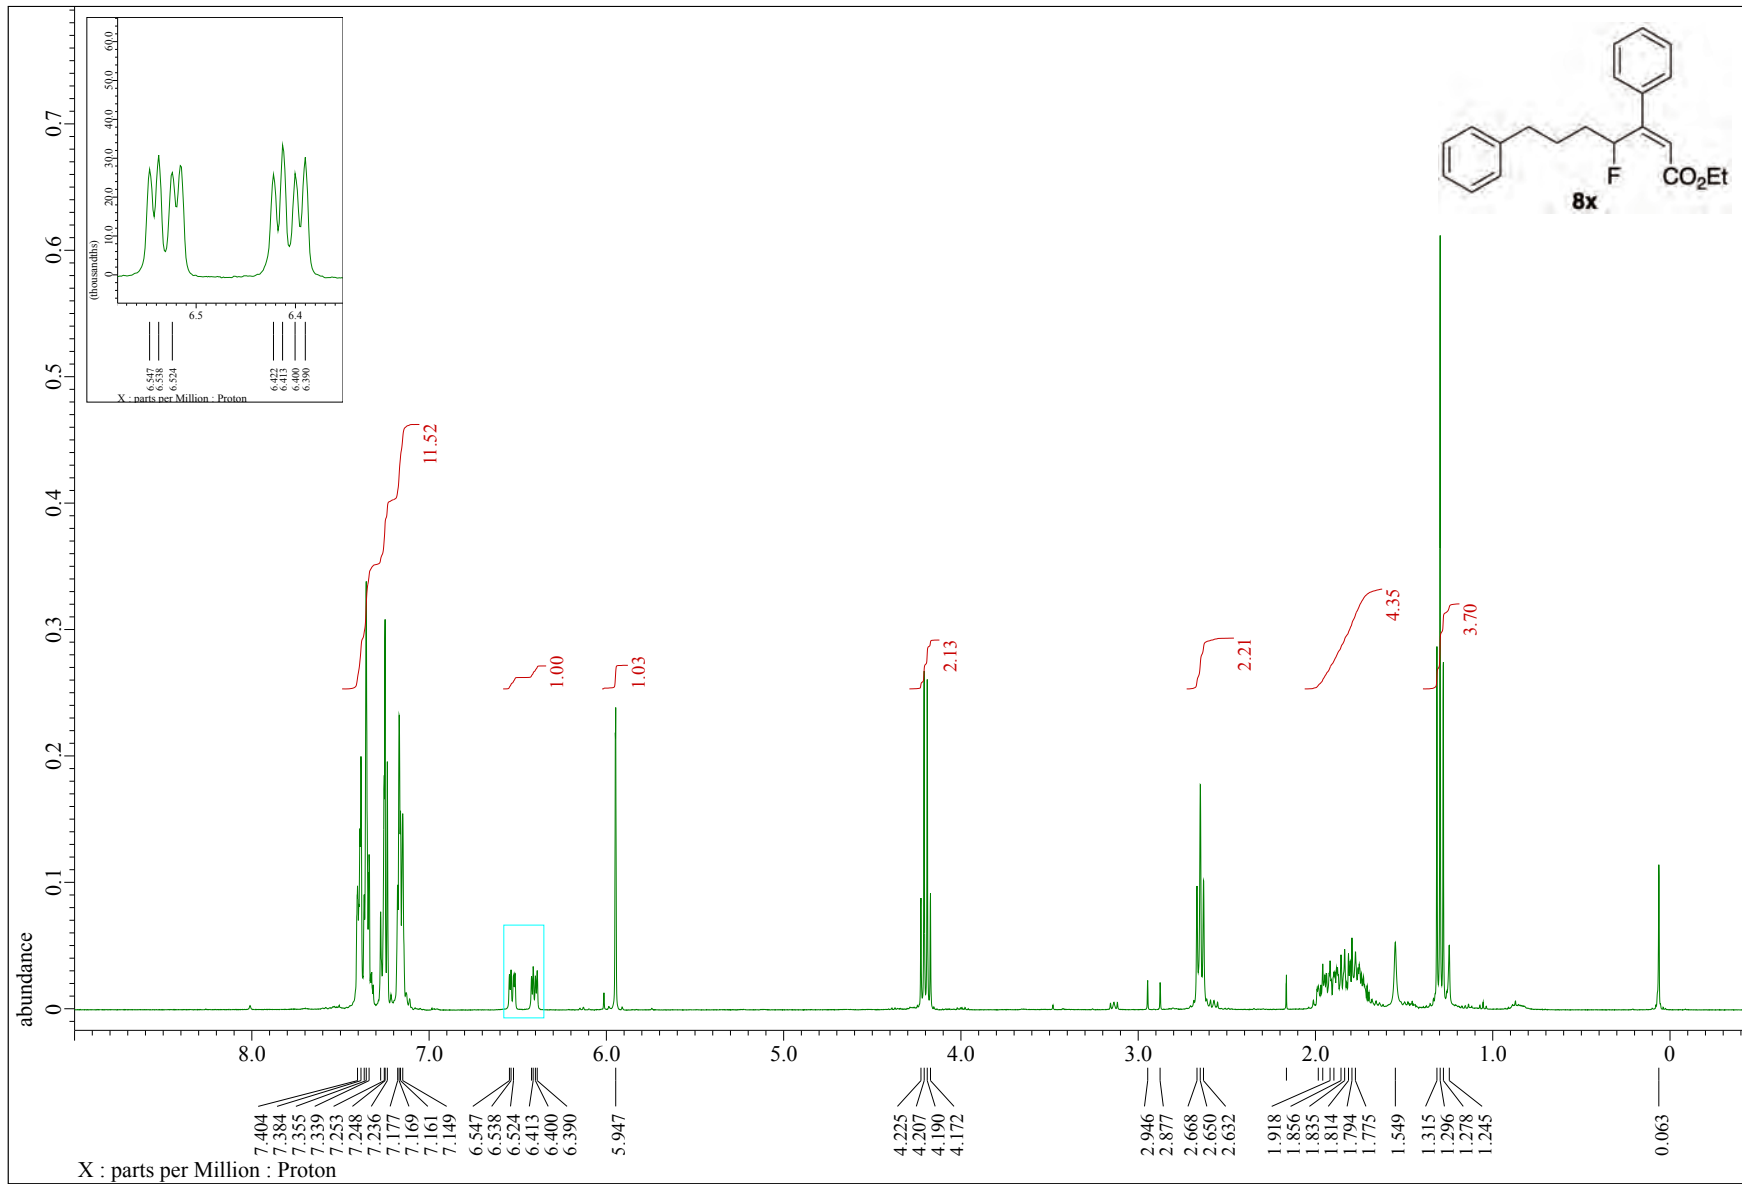

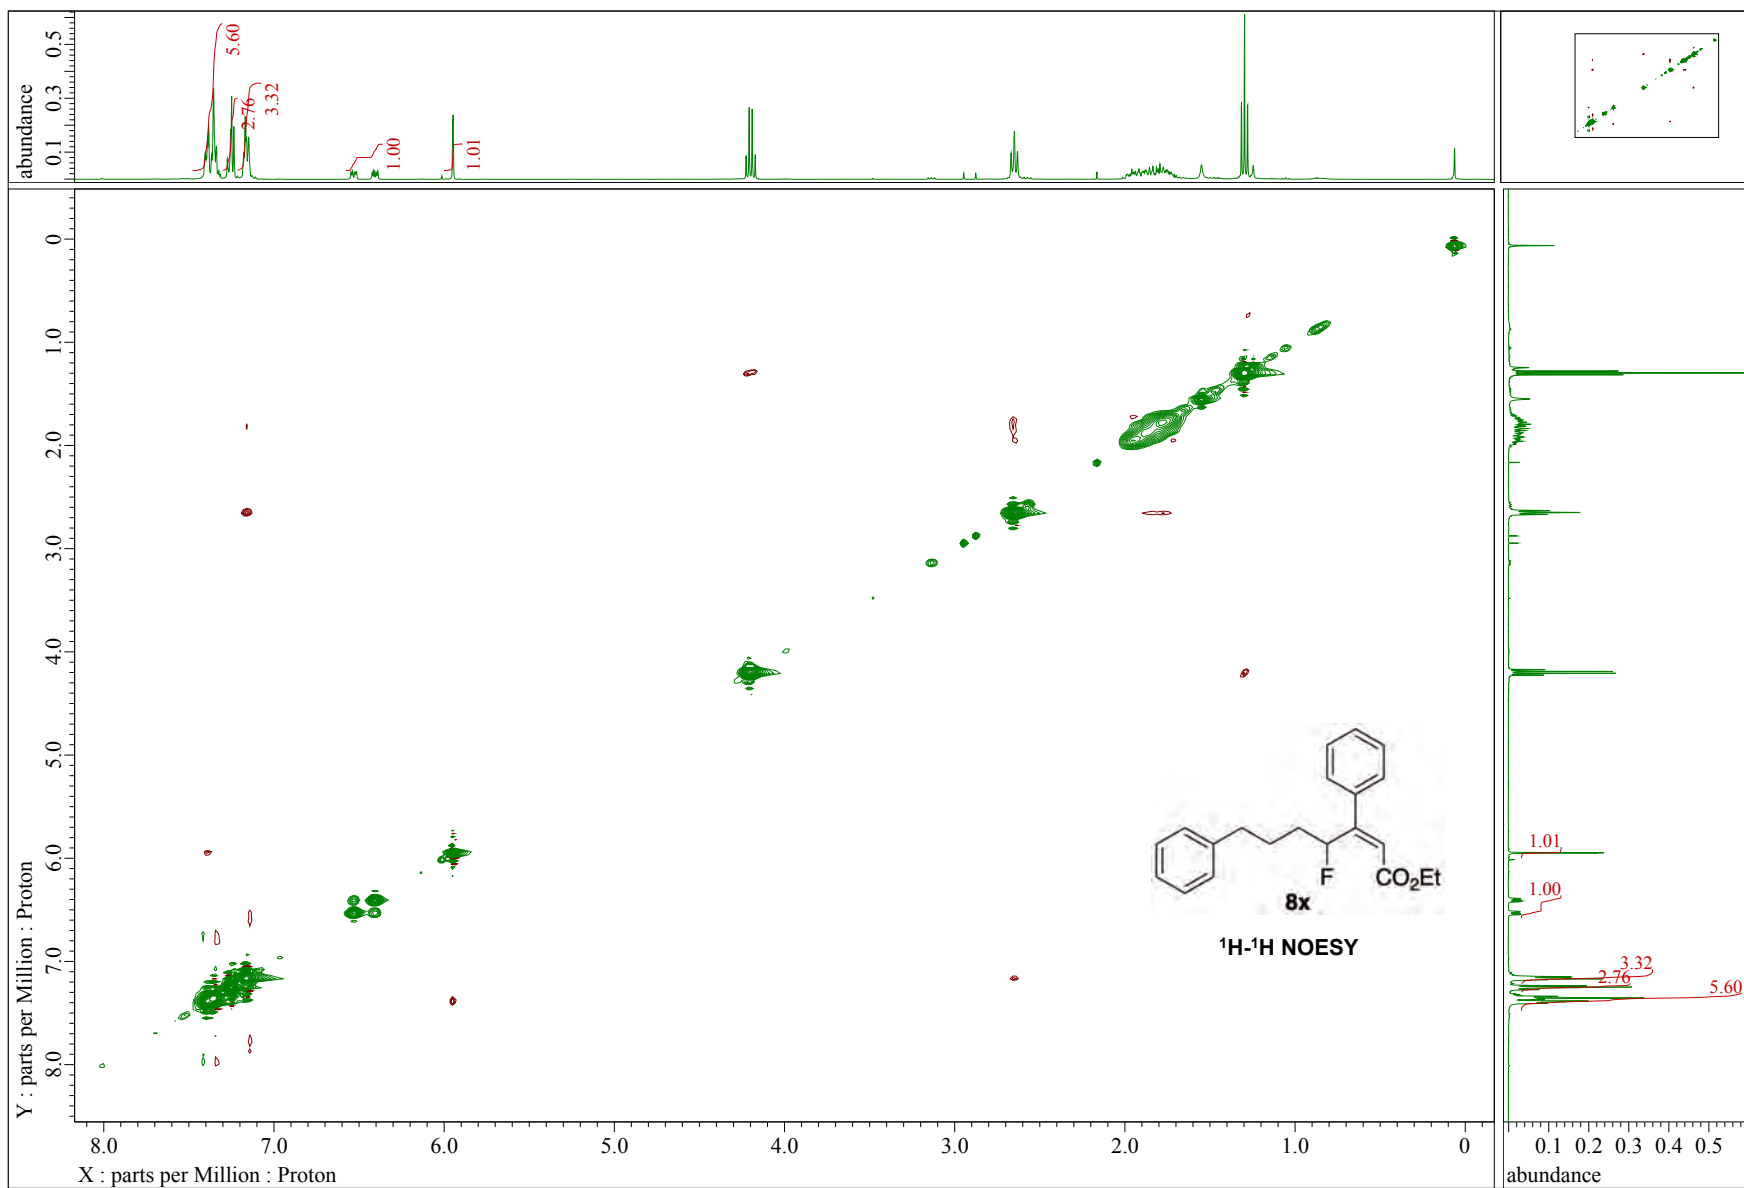

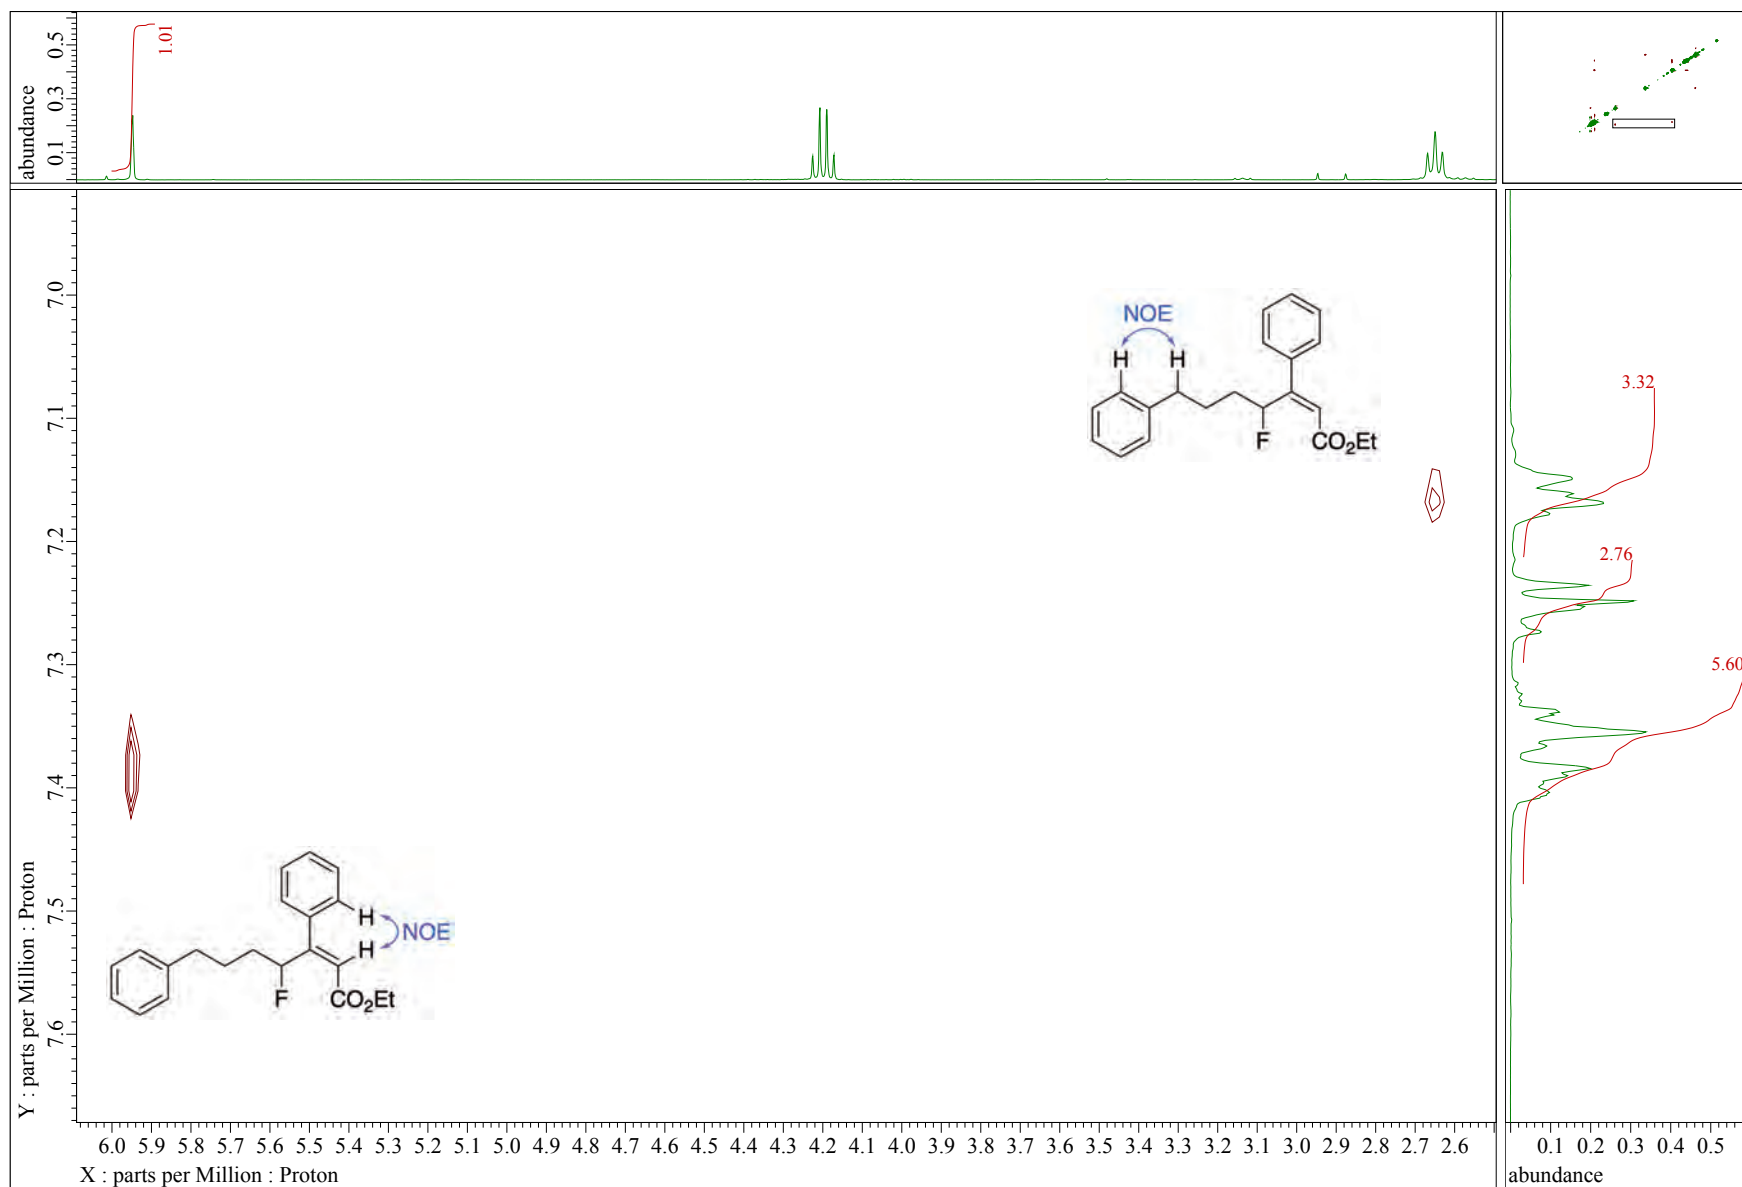

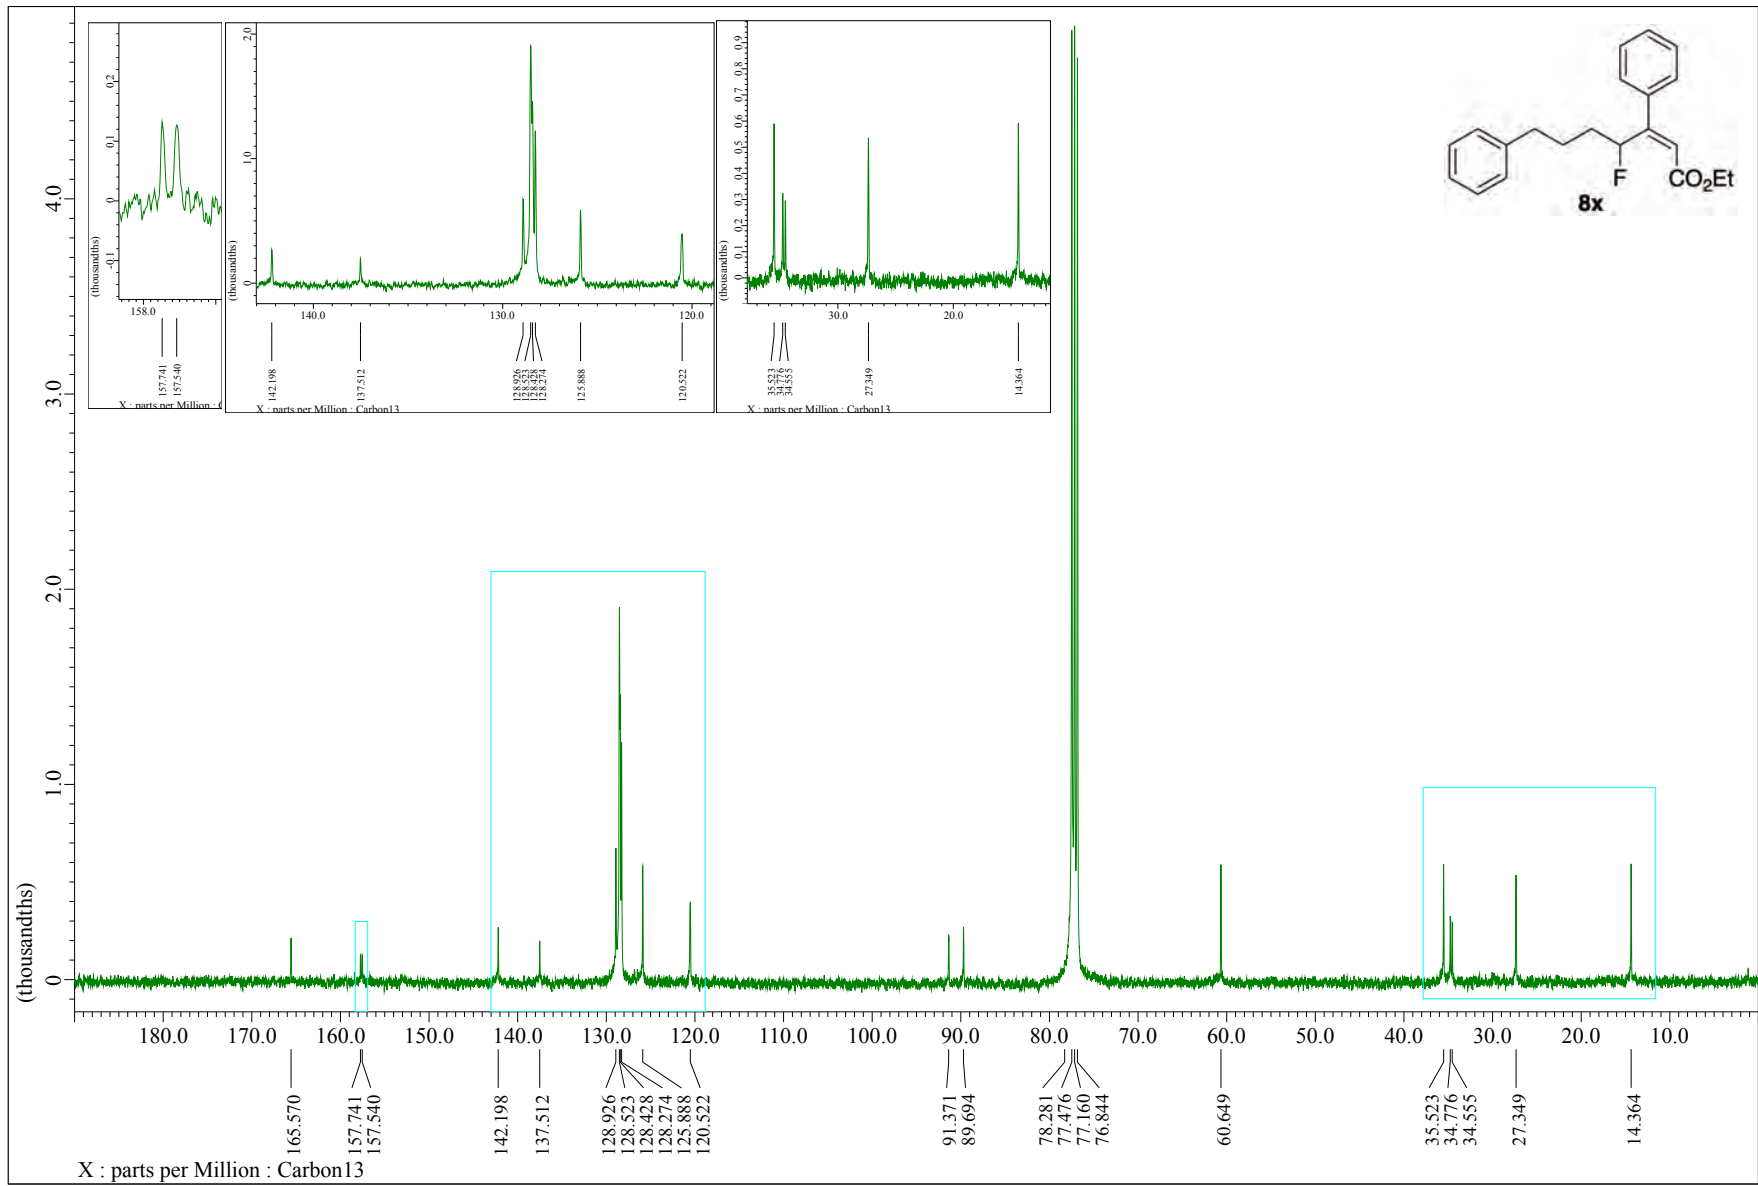

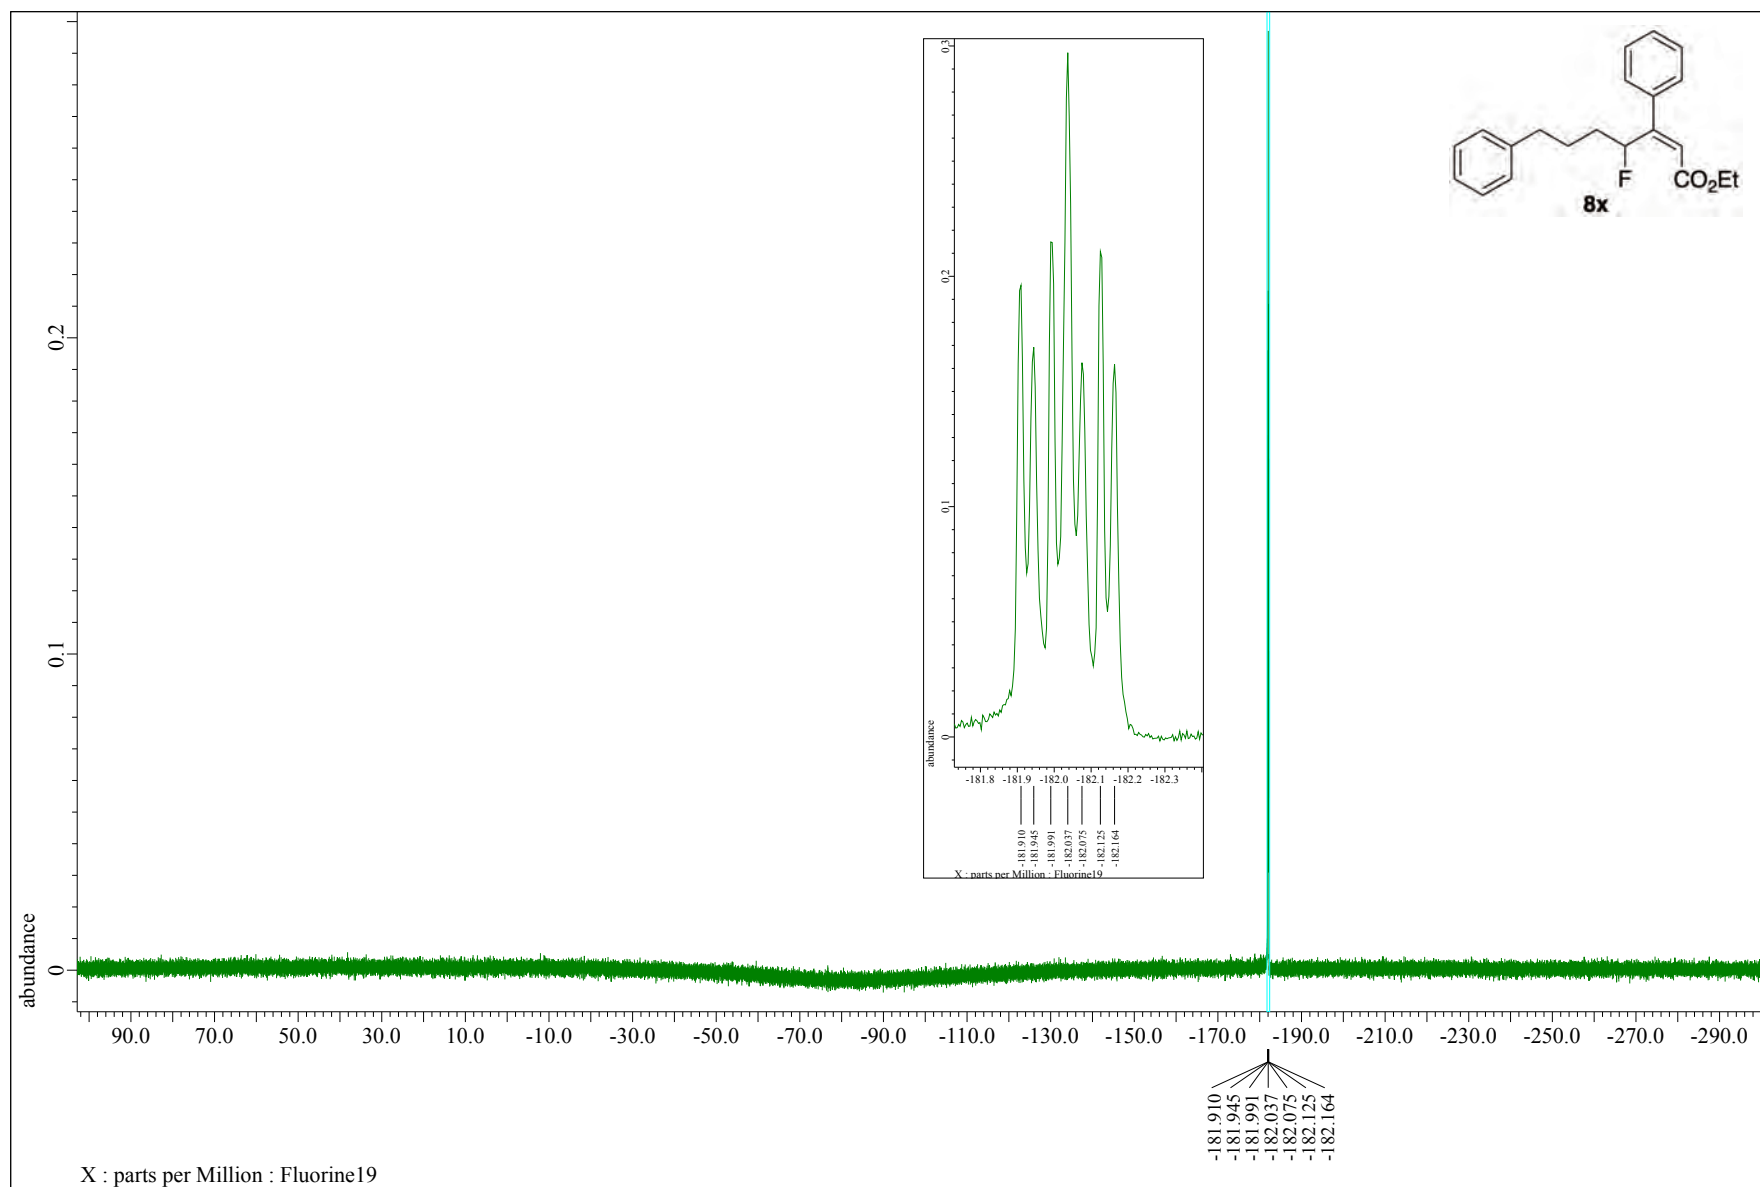

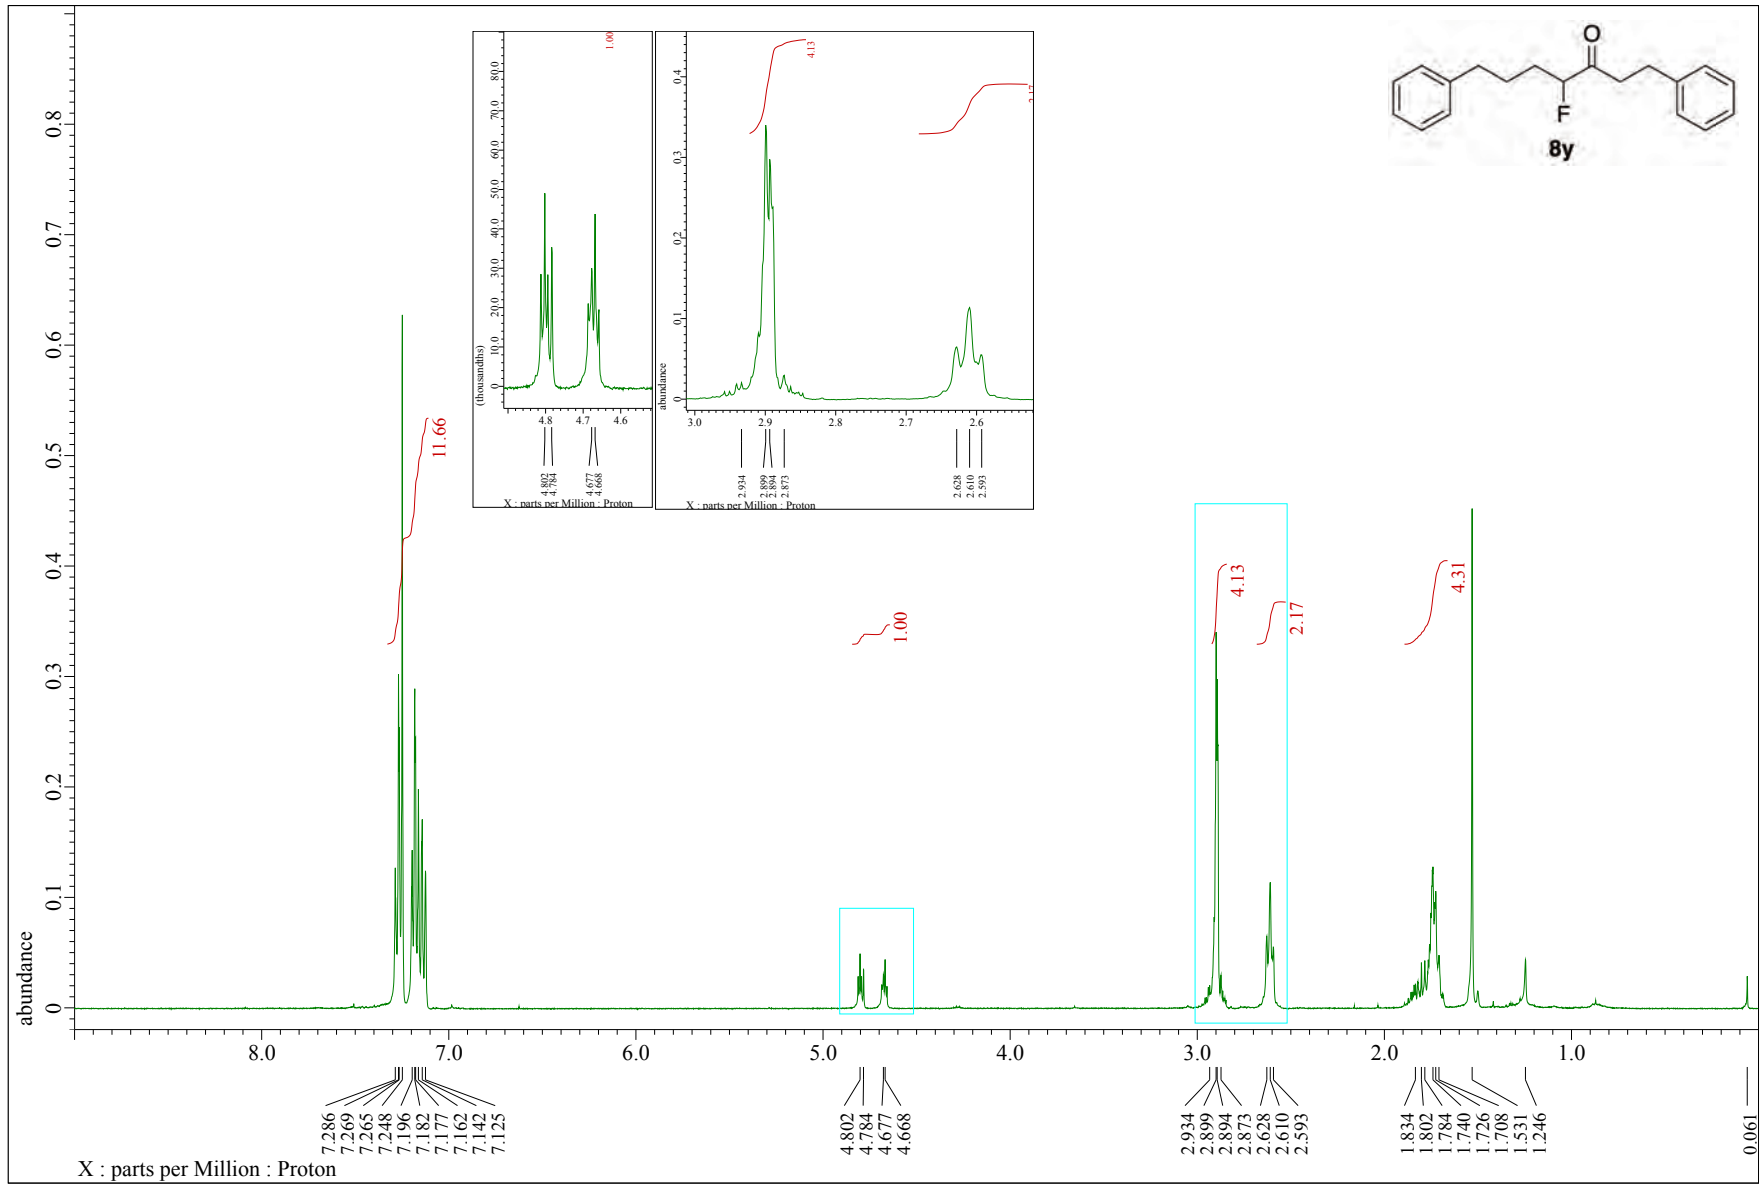

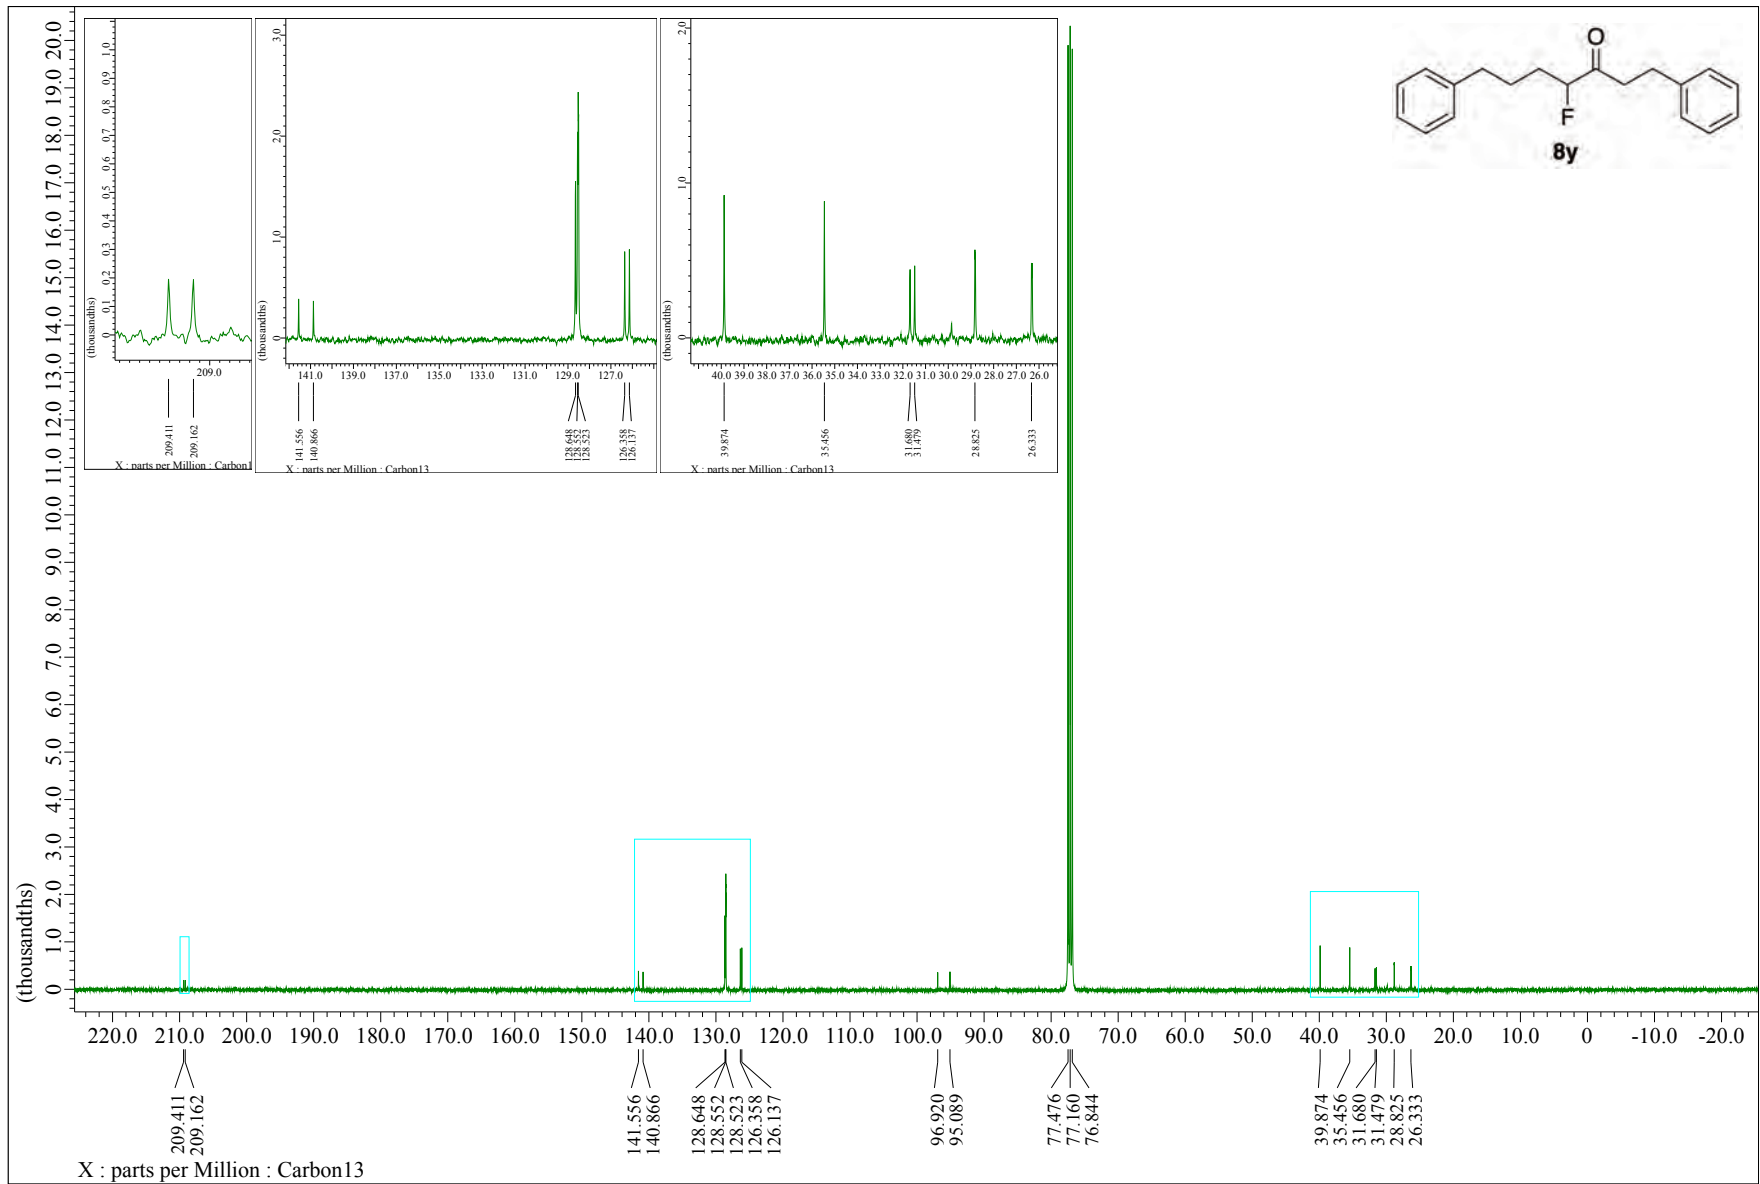



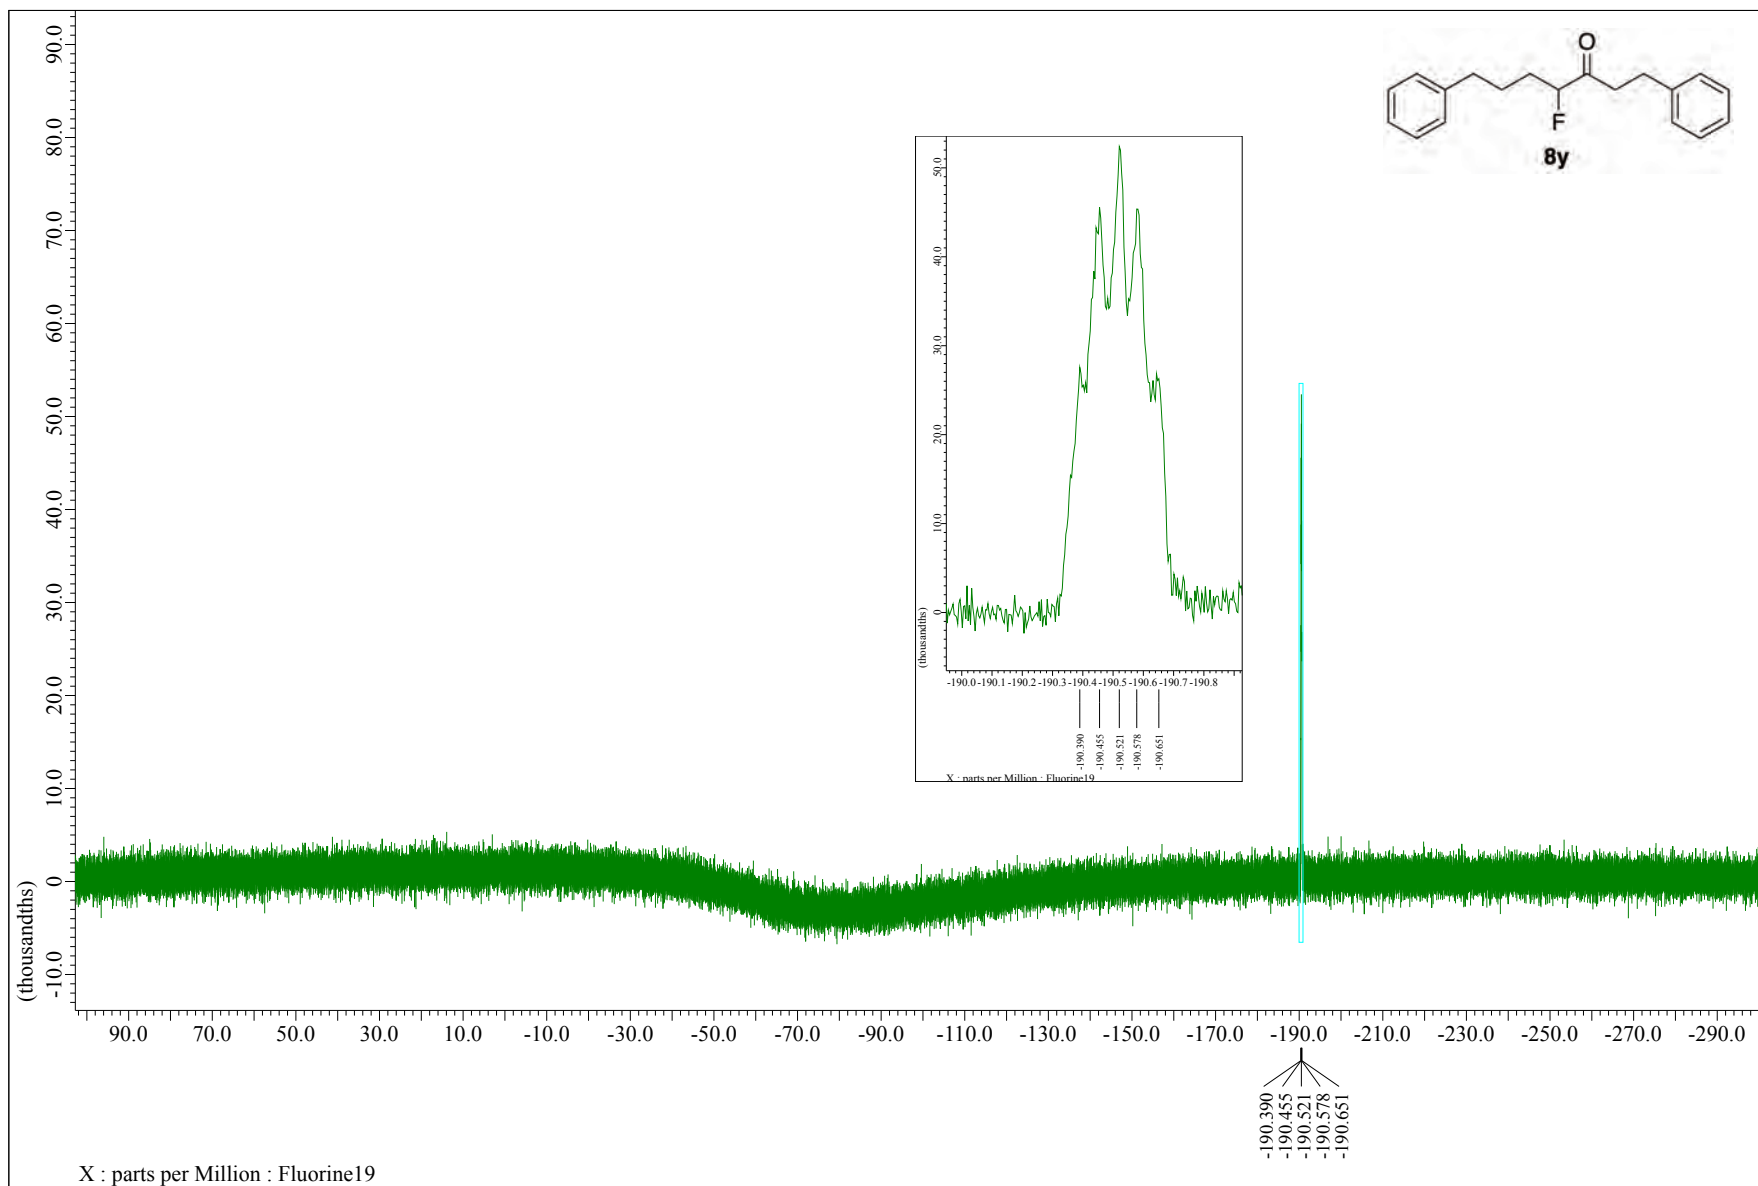

Sample No. : C:\Xcalibur\...1228\BG\_231853\_8,\_\_\_

Instrument : Exactive Plus

Mobile phase solvent : MeOH

Operator name : hayashi harumi

Sample solvent : CHCl3

Date : 12/28/23 14:02:57

Instrumental method : C:\Xcalibur\methods\ESI\_100ul\S60\_100ul\_mz100\_1500pn.meth

Instrumental Analysis Division, Global Facility Center, Creative Research Institution, Hokkaido University

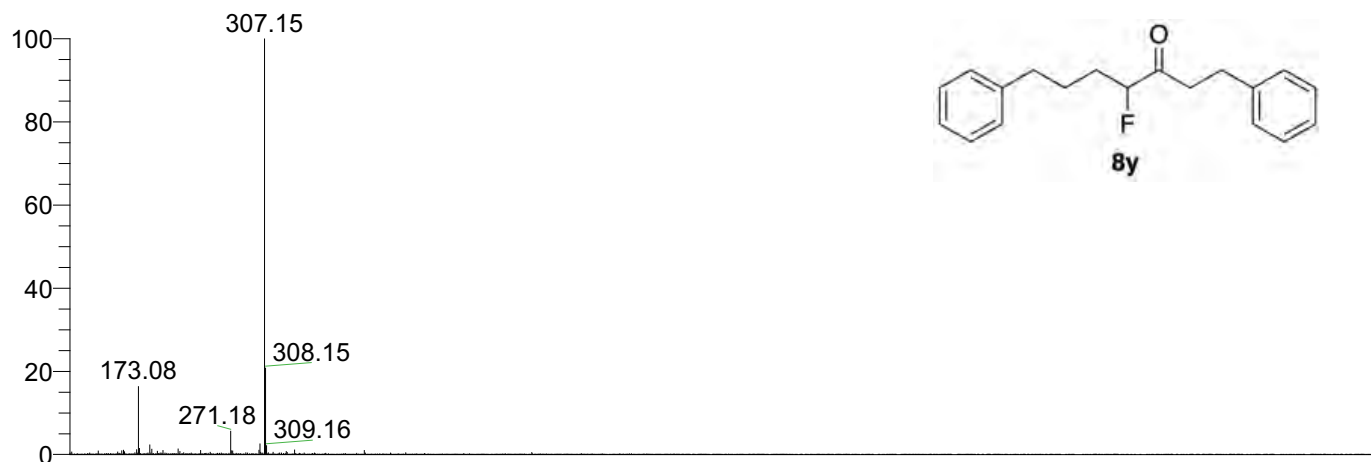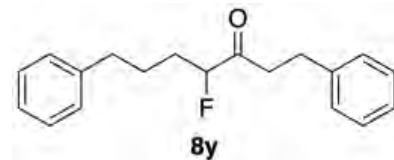

NL: 6.57E7  
BG\_231853\_8y\_pn#1  
8-31 RT: 0.31-0.49  
AV: 7 T: FTMS + c  
ESI Full ms  
[100.00-1500.00]

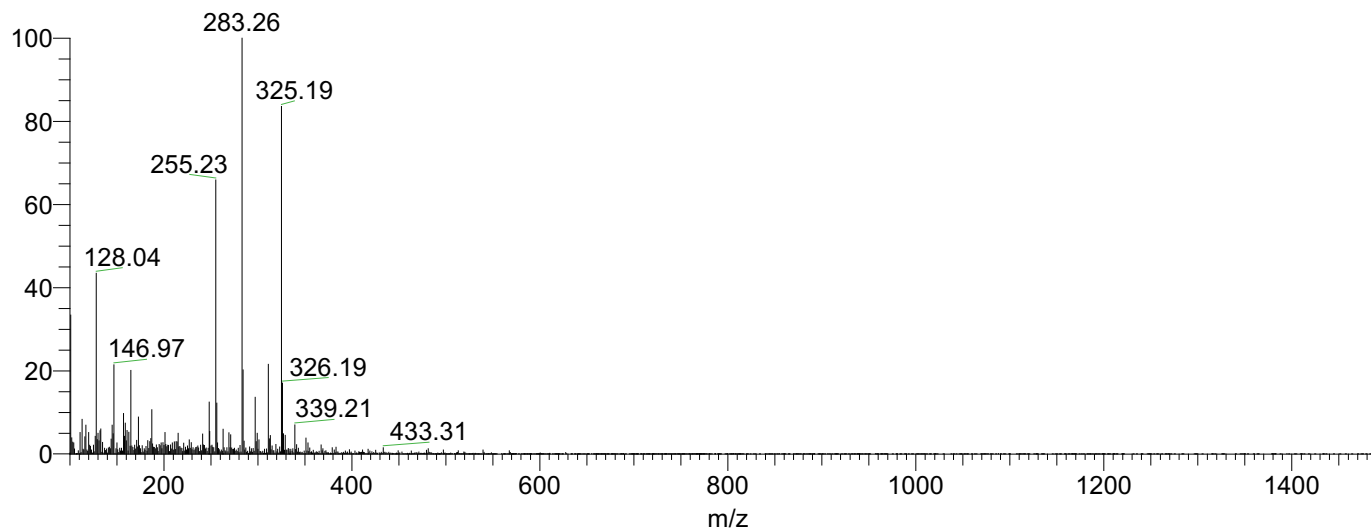

NL: 3.78E6  
BG\_231853\_8y\_pn#1  
8-31 RT: 0.29-0.48  
AV: 7 T: FTMS - c ESI  
Full ms  
[100.00-1500.00]

Sample No. : C:\Xcalibur\...20231211zz8\231853\_8y\_pn

Instrument : Exactive Plus

Mobile phase solvent : MeOH

Operator name : hayashi harumi

Sample solvent : CHCl3

Date : 12/28/23 11:52:49

Instrumental method : C:\Xcalibur\methods\ESI\_100ul\S60\_100ul\_mz100\_1500pn.meth

Instrumental Analysis Division, Global Facility Center, Creative Research Institution, Hokkaido University

231853\_8y\_pn #22-25 RT: 0.37-0.40 AV: 2 NL: 2.64E7

T: FTMS + p ESI Full ms [100.0000-1500.0000]

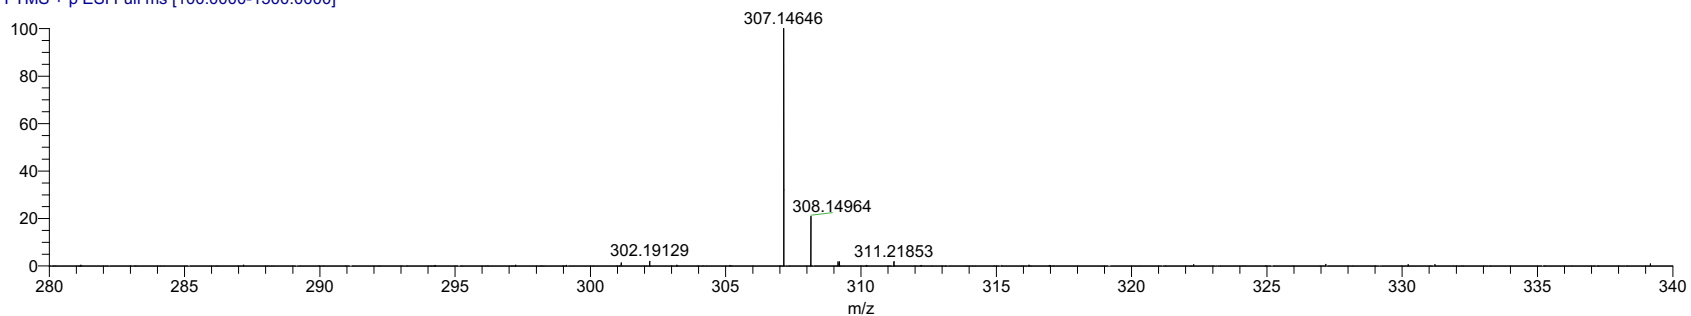

231853\_8y\_pn #25-28 RT: 0.40-0.43 AV: 2 NL: 2.35E7

T: FTMS + p ESI Full ms [100.0000-1500.0000]

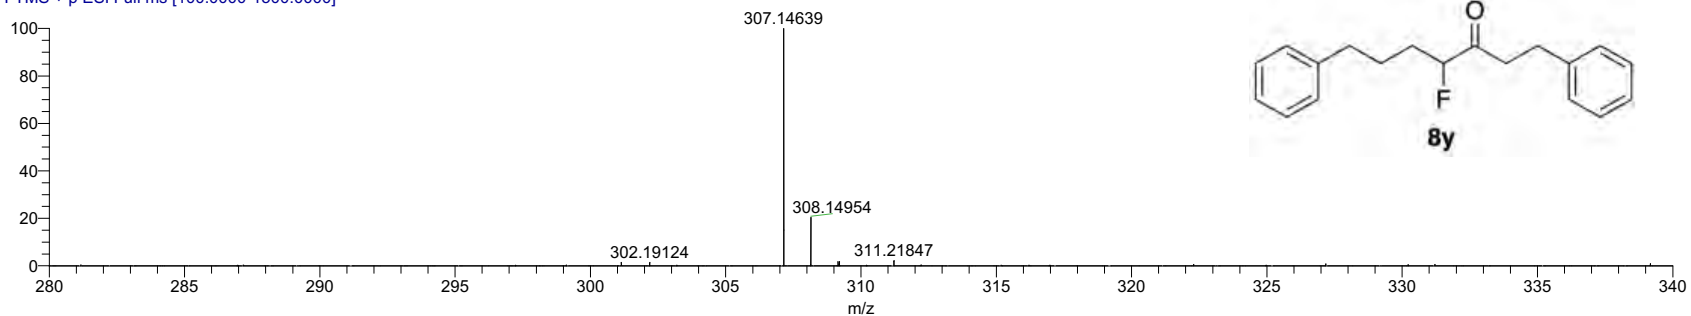

231853\_8y\_pn #28-31 RT: 0.46-0.49 AV: 2 NL: 7.53E6

T: FTMS + p ESI Full ms [100.0000-1500.0000]

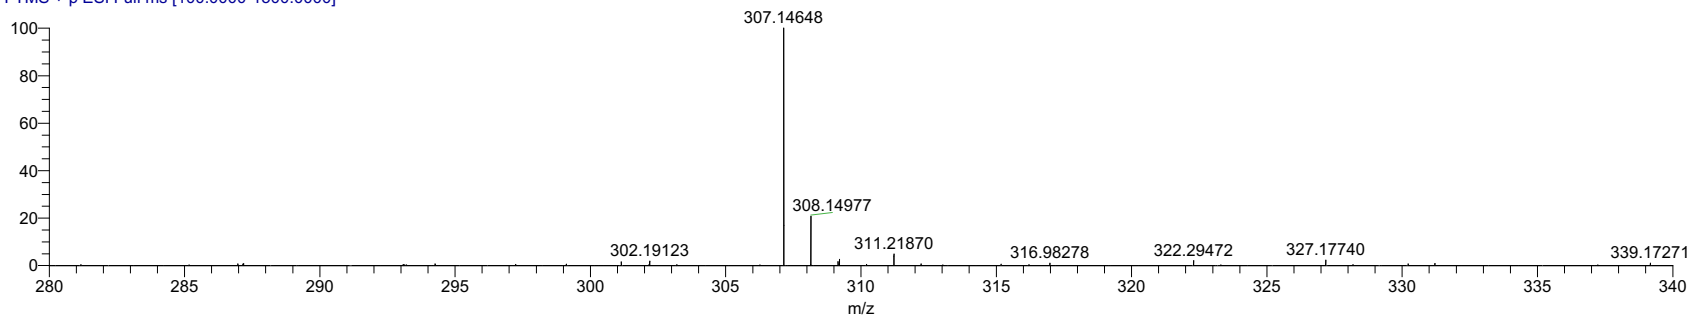

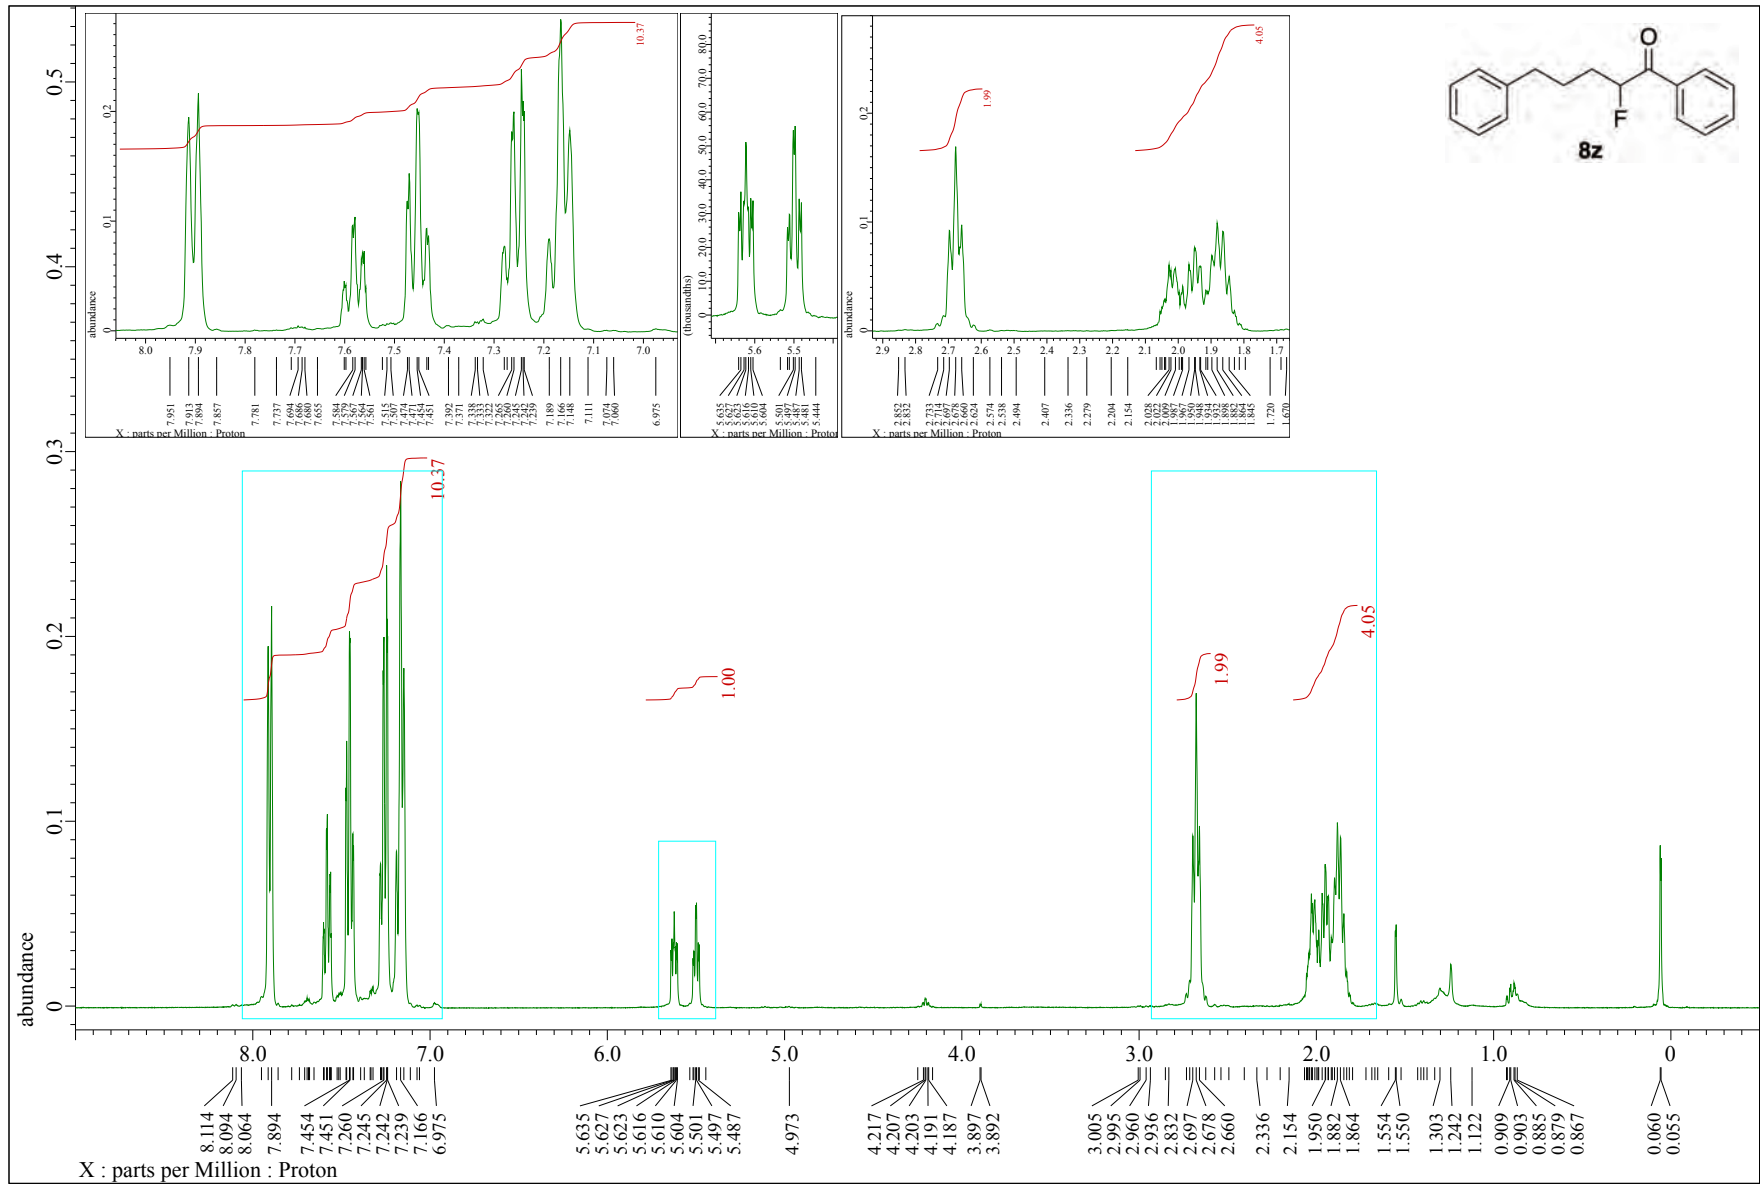

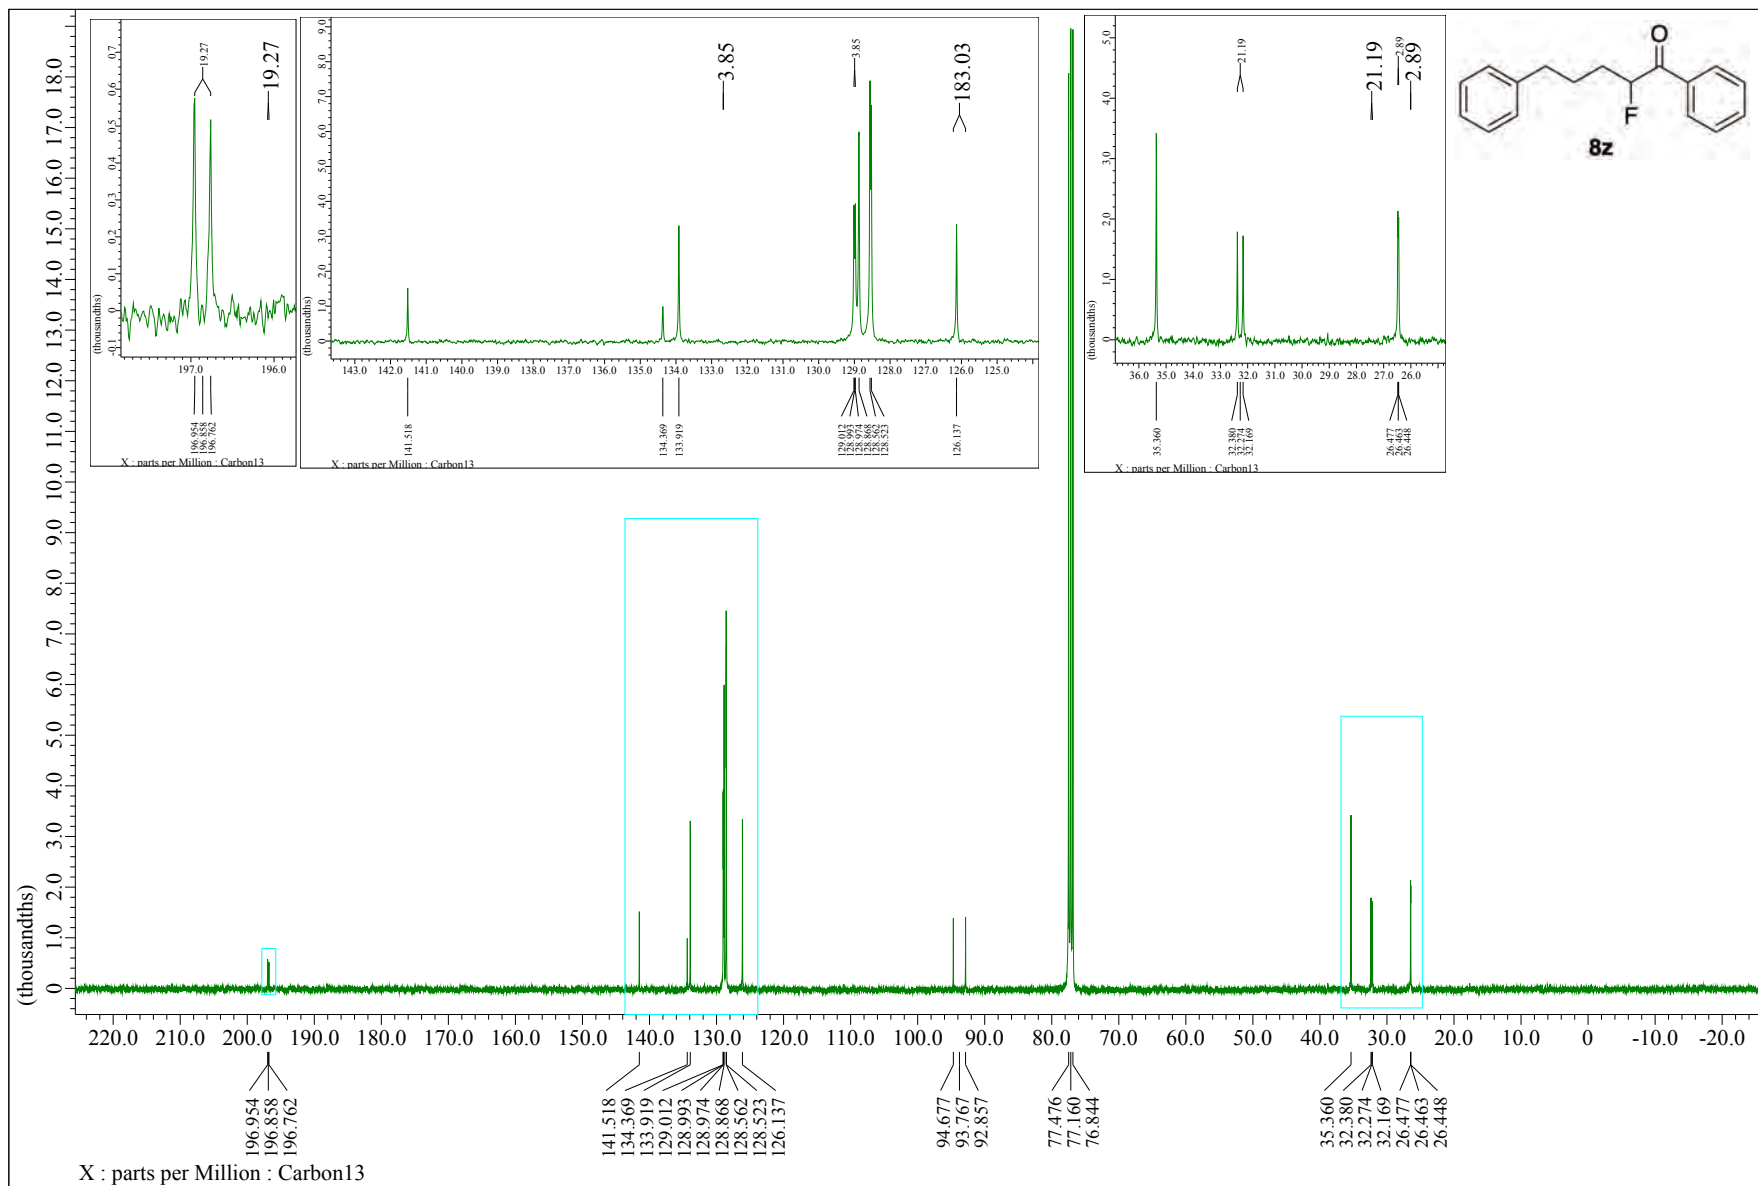

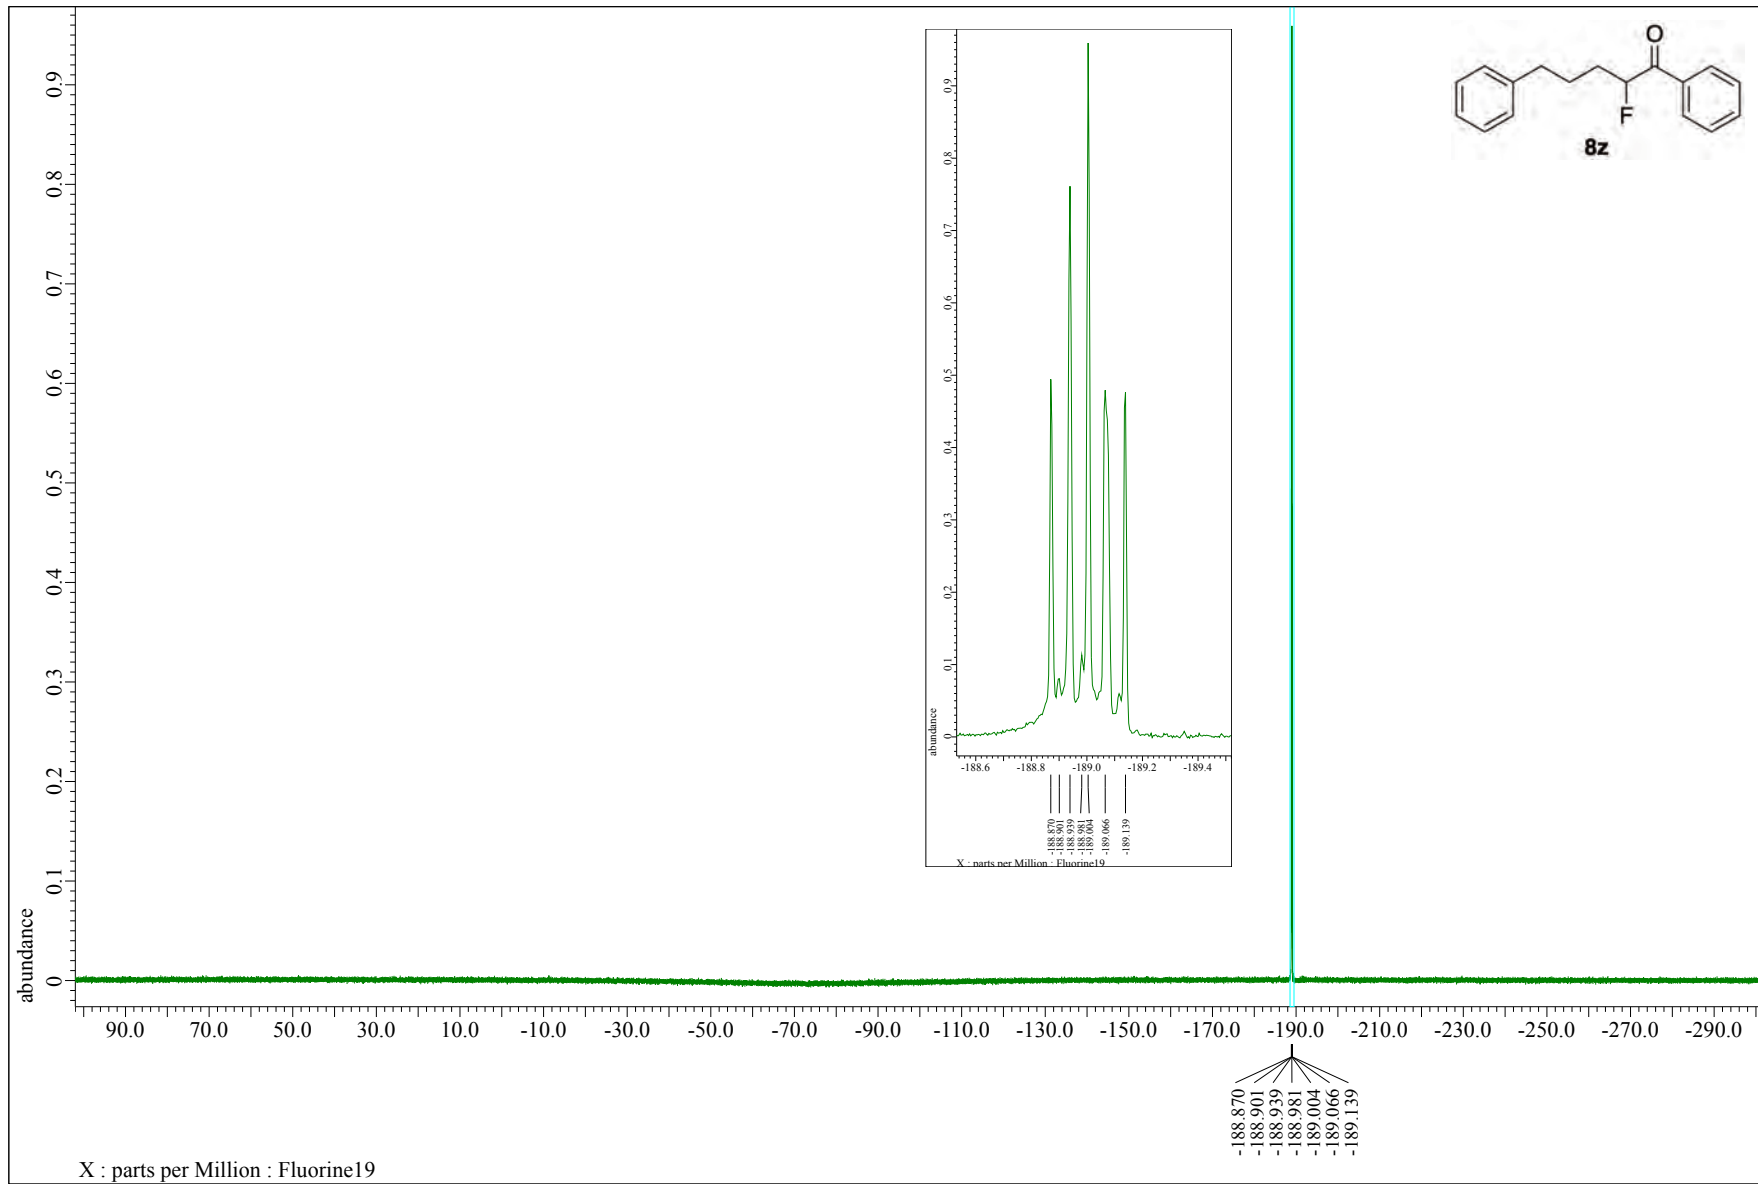

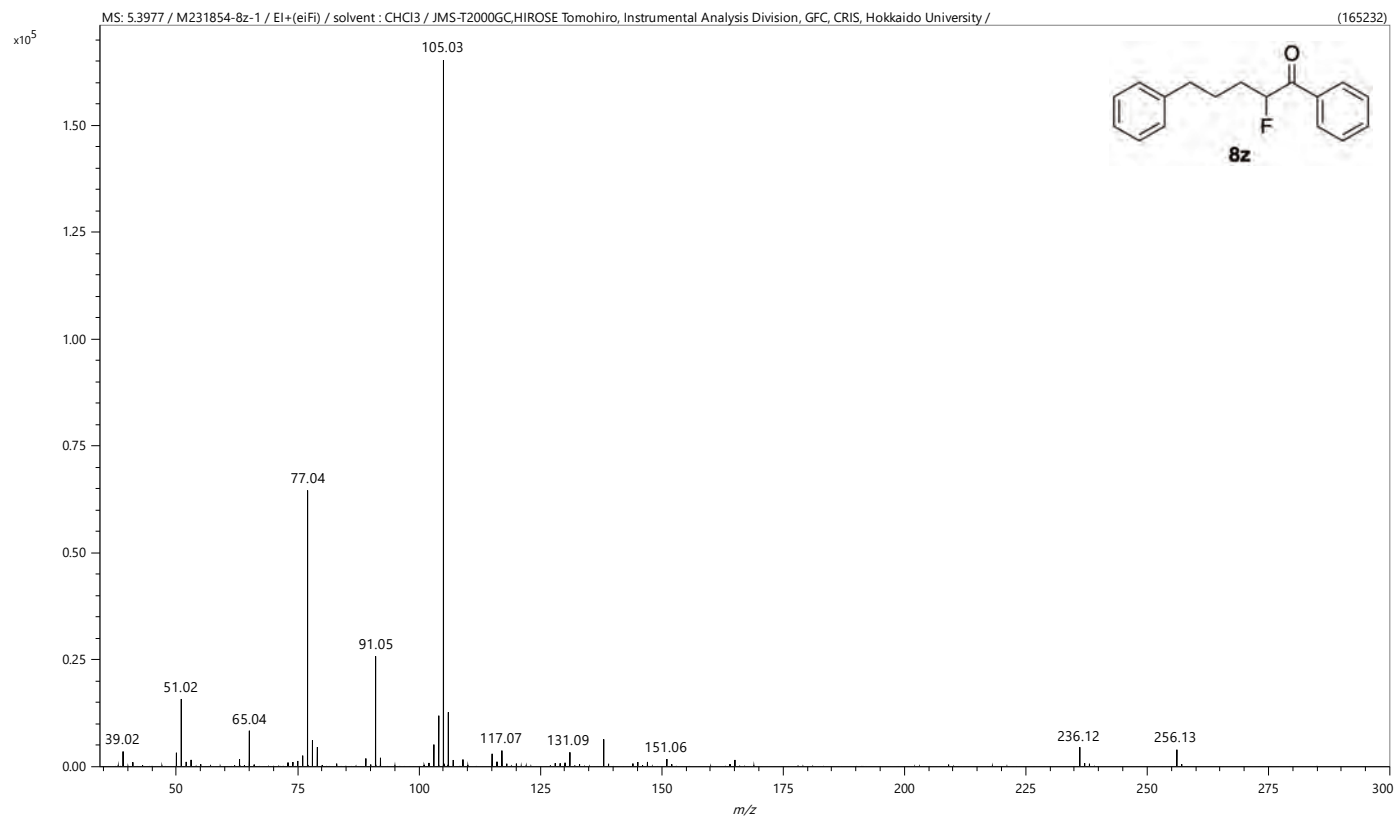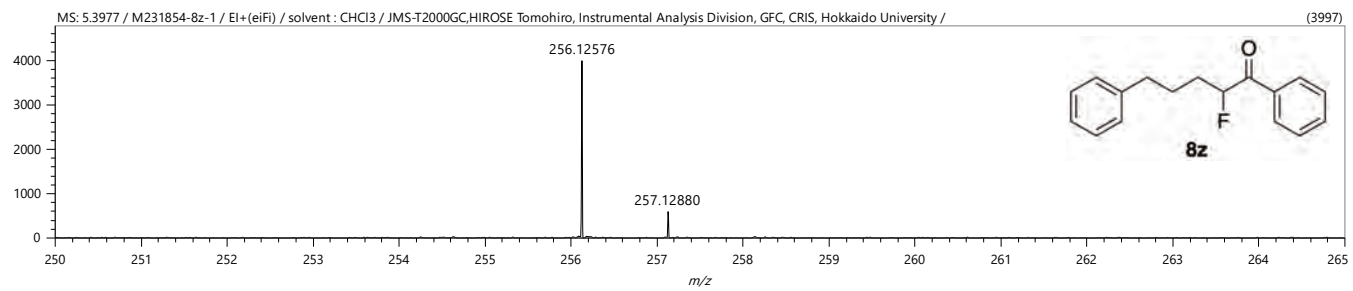

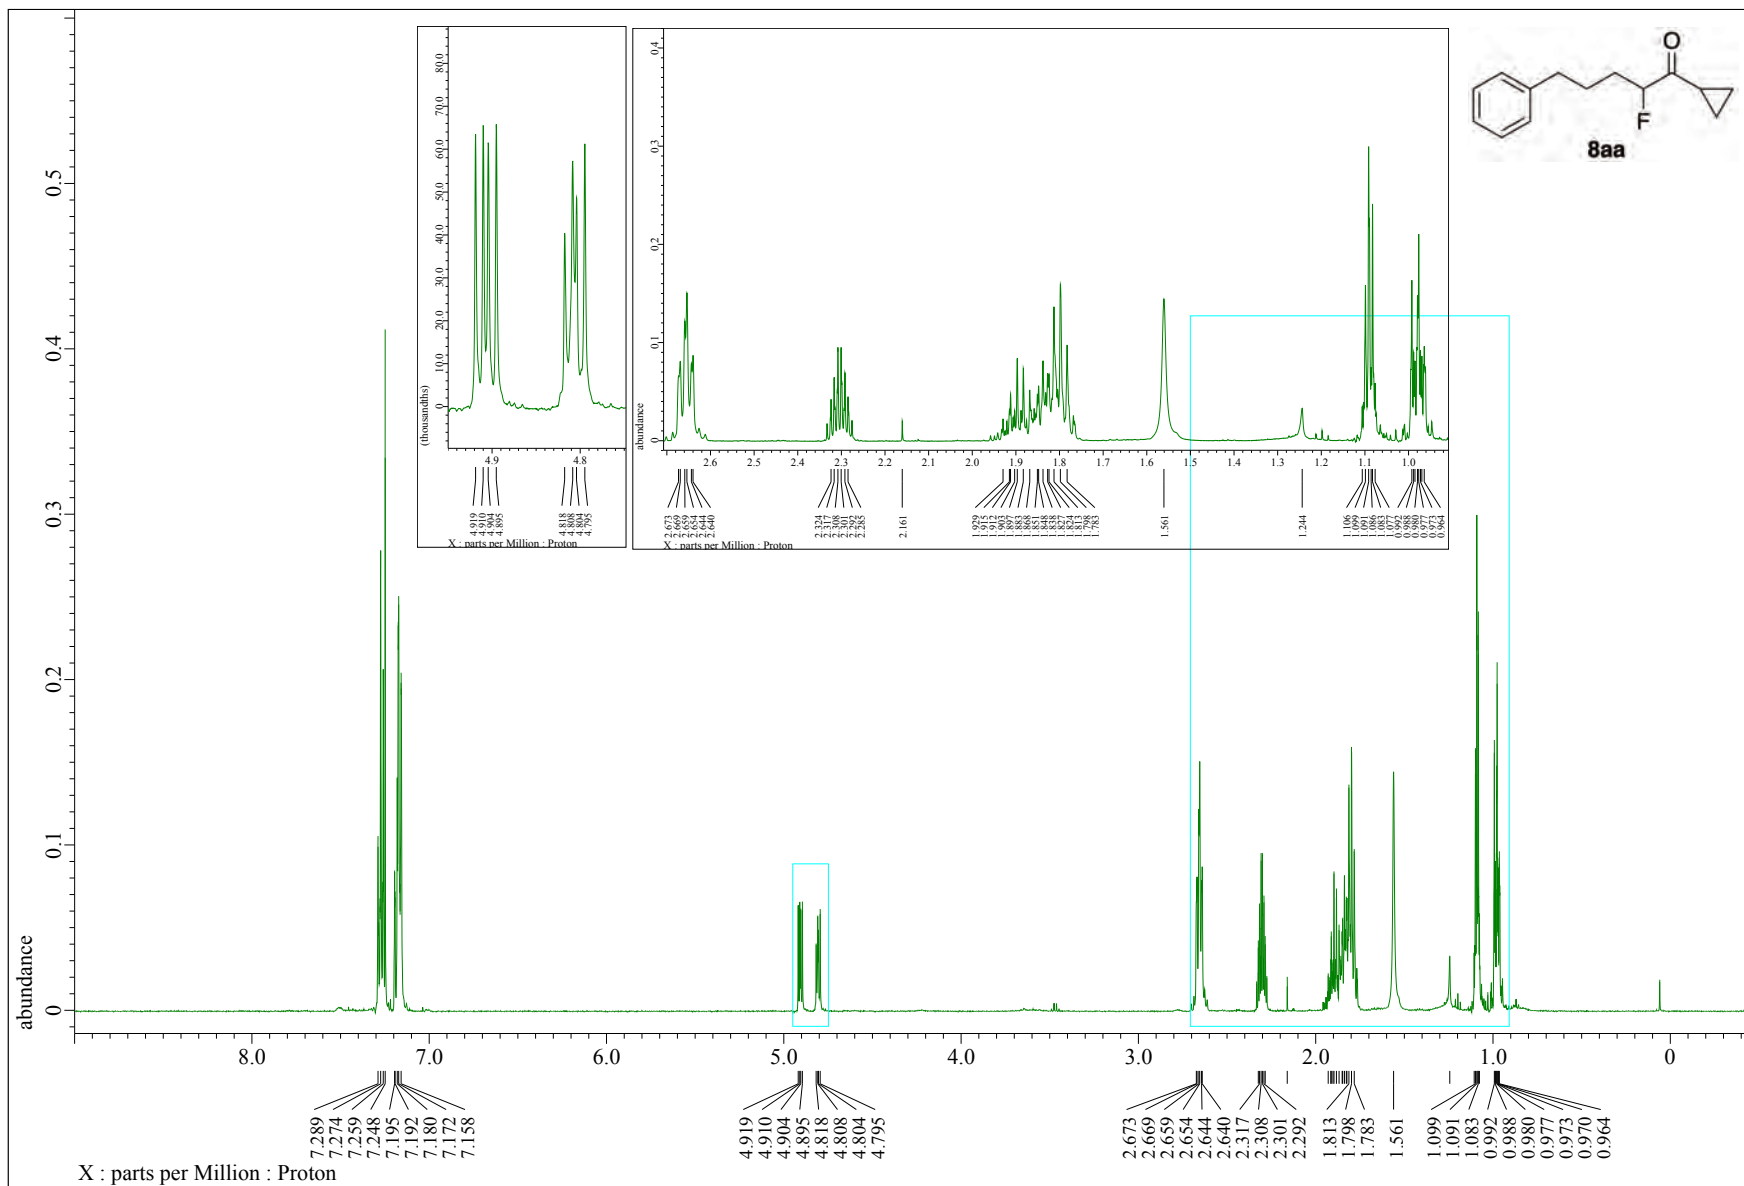



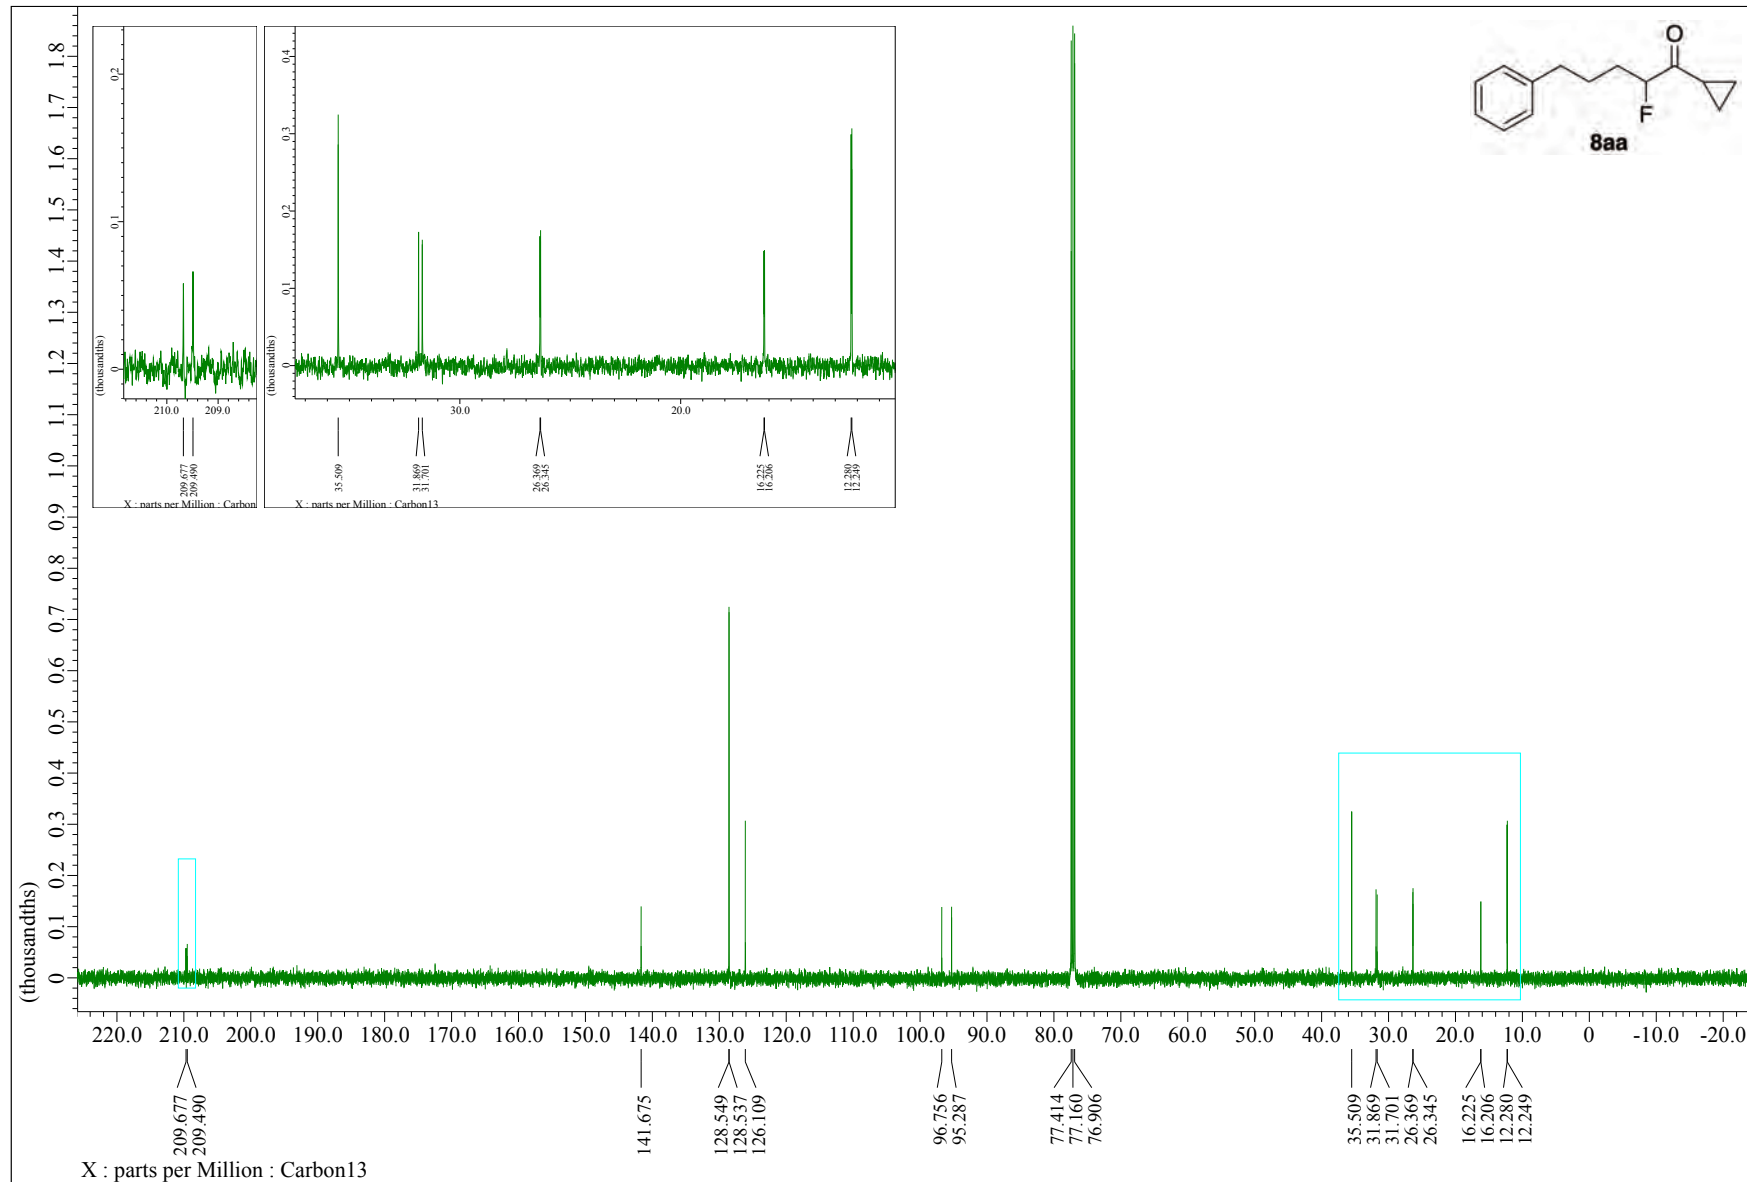

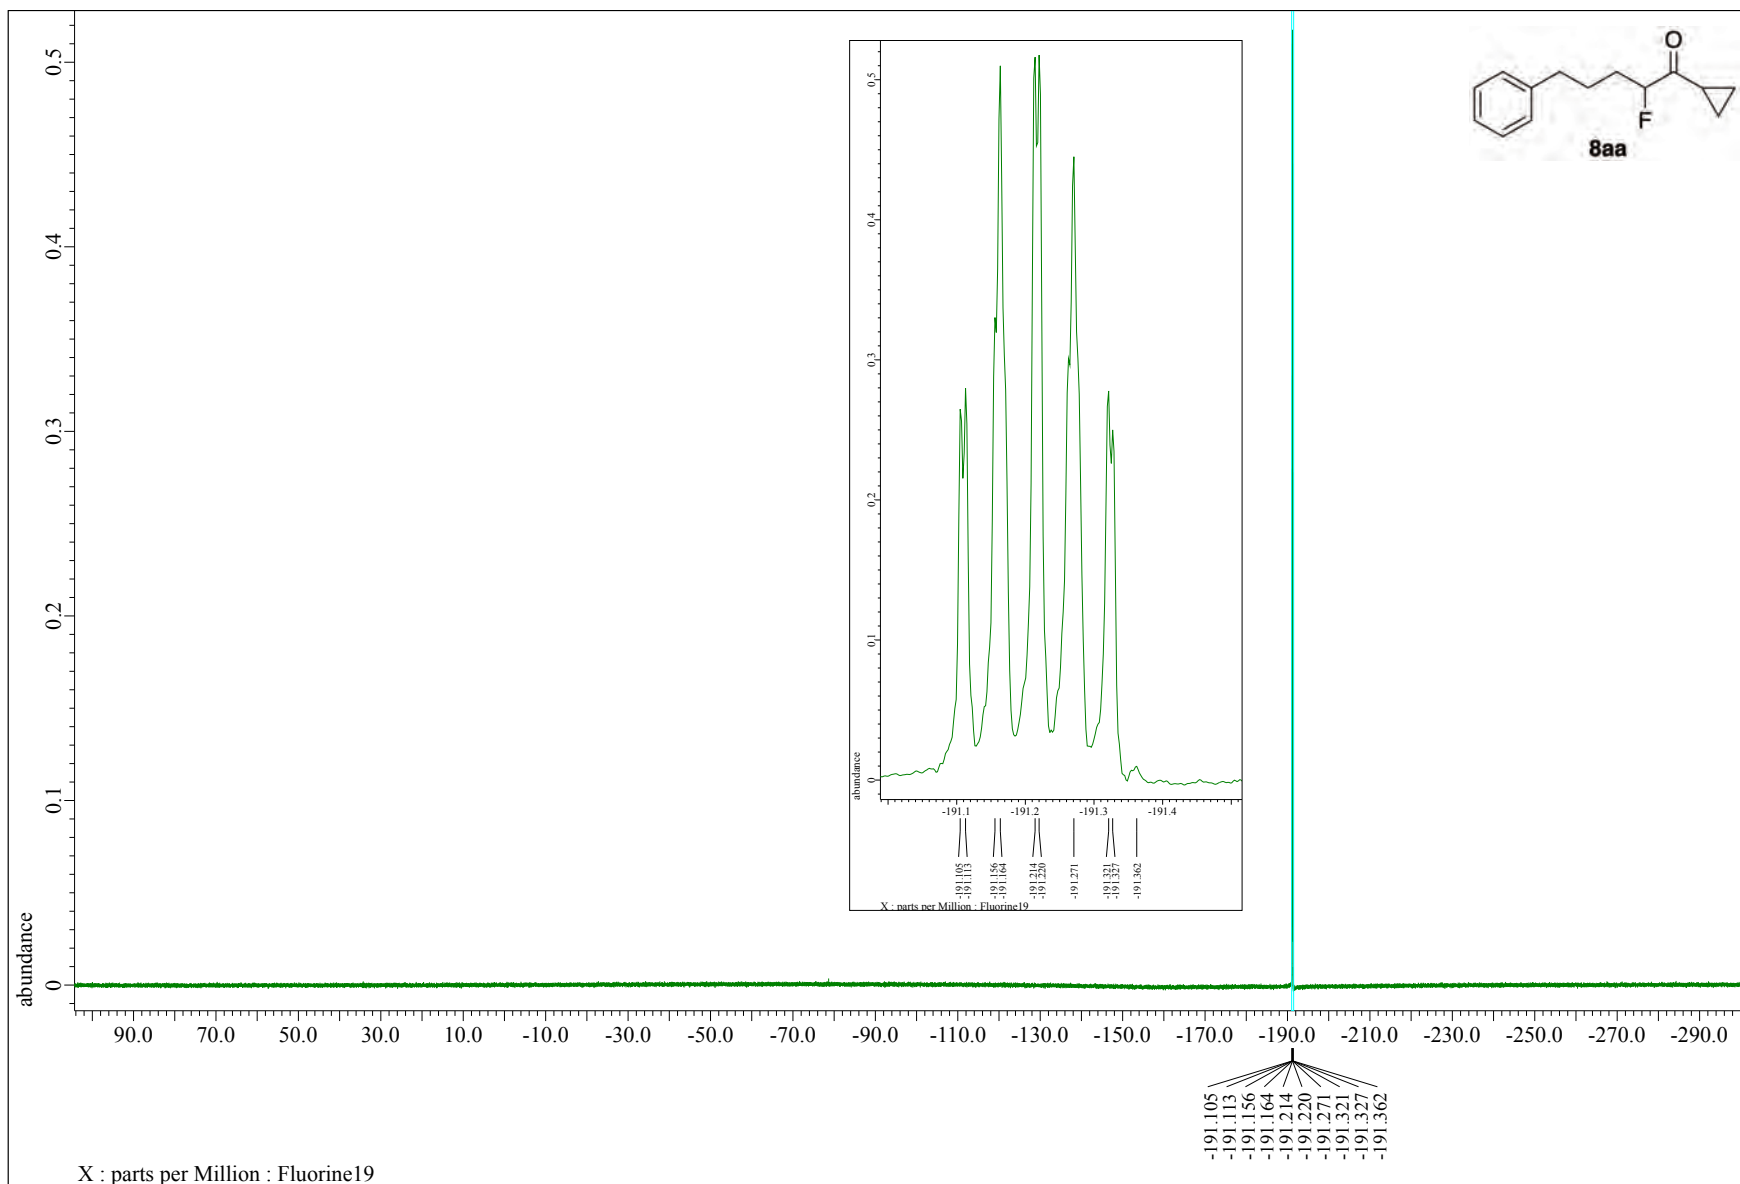

Sample No. : C:\Xcalibur\...\1228\BG\_231855\_8: \_

Instrument : Exactive Plus

Mobile phase solvent : MeOH

Operator name : hayashi harumi

Sample solvent : CHCl3

Date : 12/28/23 14:03:24

Instrumental method : C:\Xcalibur\methods\ESI\_100ul\S60\_100ul\_mz100\_1500pn.meth

Instrumental Analysis Division, Global Facility Center, Creative Research Institution, Hokkaido University

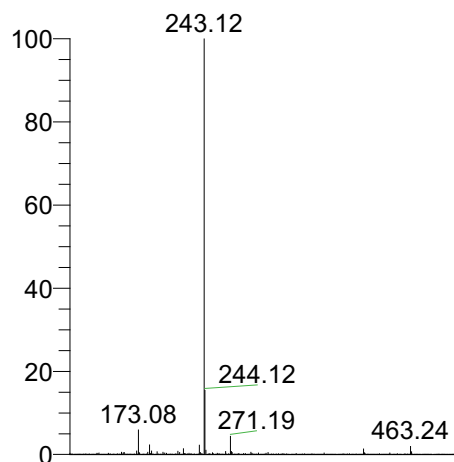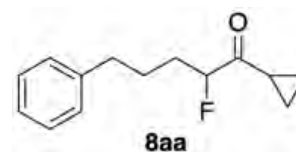

NL: 5.05E8  
BG\_231855\_8aa\_pn#  
18-32 RT: 0.31-0.49  
AV: 7 T: FTMS + c  
ESI Full ms  
[100.00-1500.00]

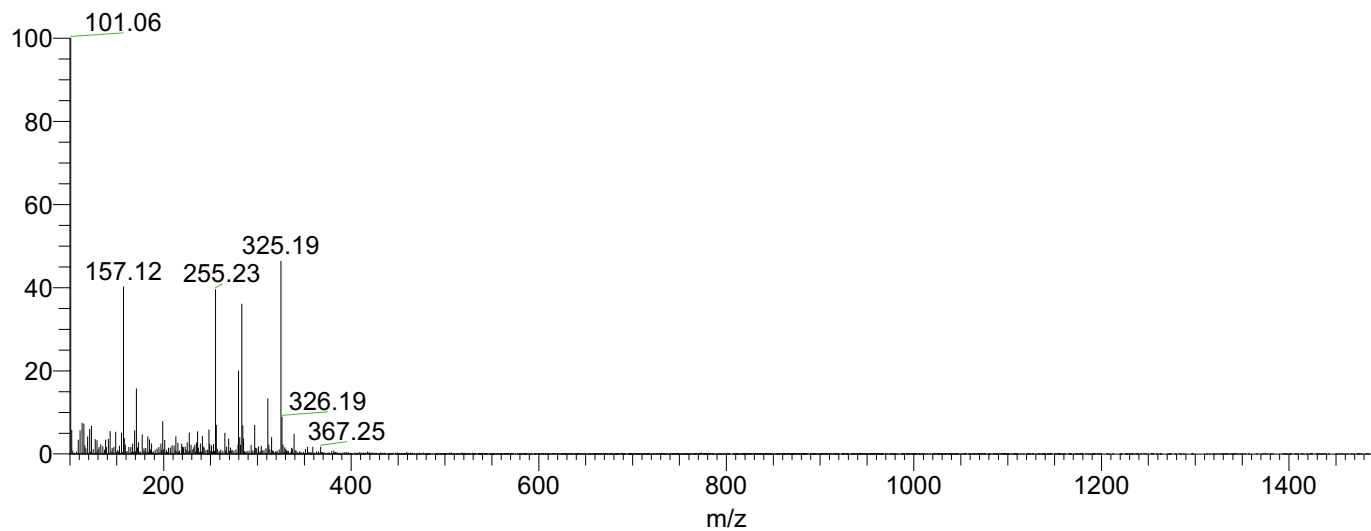

NL: 1.48E7  
BG\_231855\_8aa\_pn#  
18-32 RT: 0.29-0.51  
AV: 8 T: FTMS - c ESI  
Full ms  
[100.00-1500.00]

Sample No. : C:\Xcalibur\...1228\201005\_8aa\_pn

Instrument : Exactive Plus

Mobile phase solvent : MeOH

Operator name : hayashi harumi

Sample solvent : CHCl<sub>3</sub>

Date : 12/28/23 12:06:15

Instrumental method : C:\Xcalibur\methods\ESI\_100ul\S60\_100ul\_mz100\_1500pn.meth

Instrumental Analysis Division, Global Facility Center, Creative Research Institution, Hokkaido University

231855\_8aa\_pn#22-25 RT: 0.37-0.40 AV: 2 NL: 2.16E8

T: FTMS + p ESI Full ms [100.0000-1500.0000]

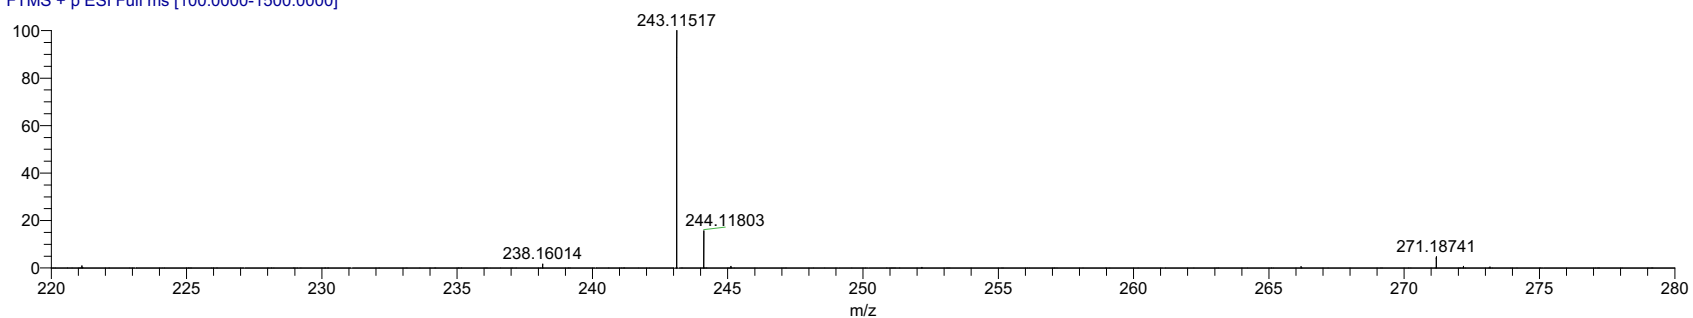

231855\_8aa\_pn#25-28 RT: 0.40-0.43 AV: 2 NL: 1.64E8

T: FTMS + p ESI Full ms [100.0000-1500.0000]

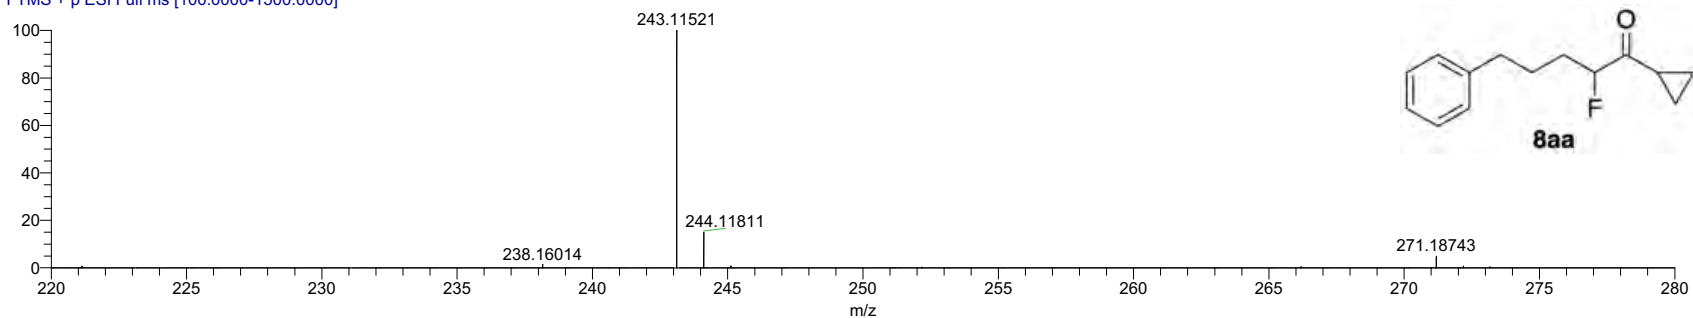

231855\_8aa\_pn#28-32 RT: 0.46-0.49 AV: 2 NL: 8.06E7

T: FTMS + p ESI Full ms [100.0000-1500.0000]

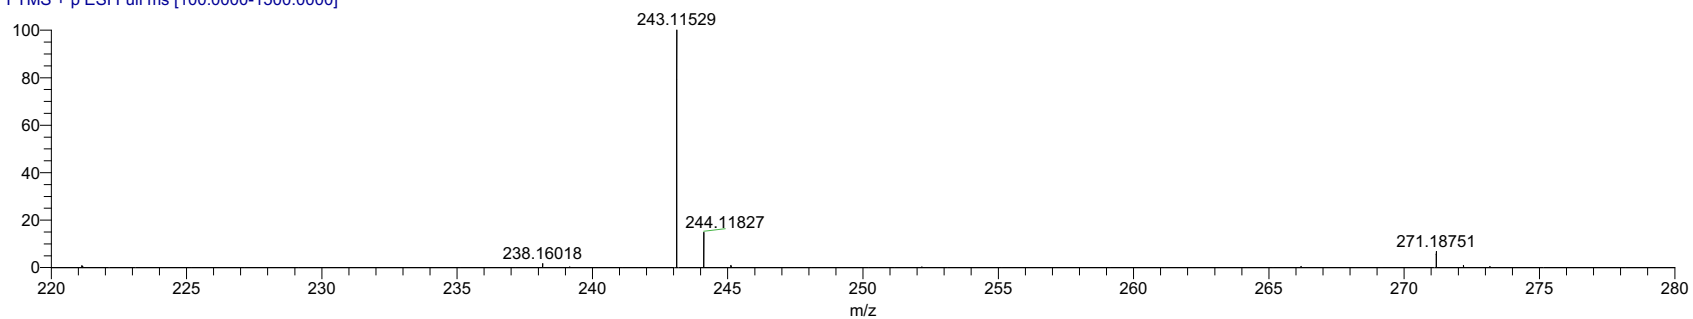

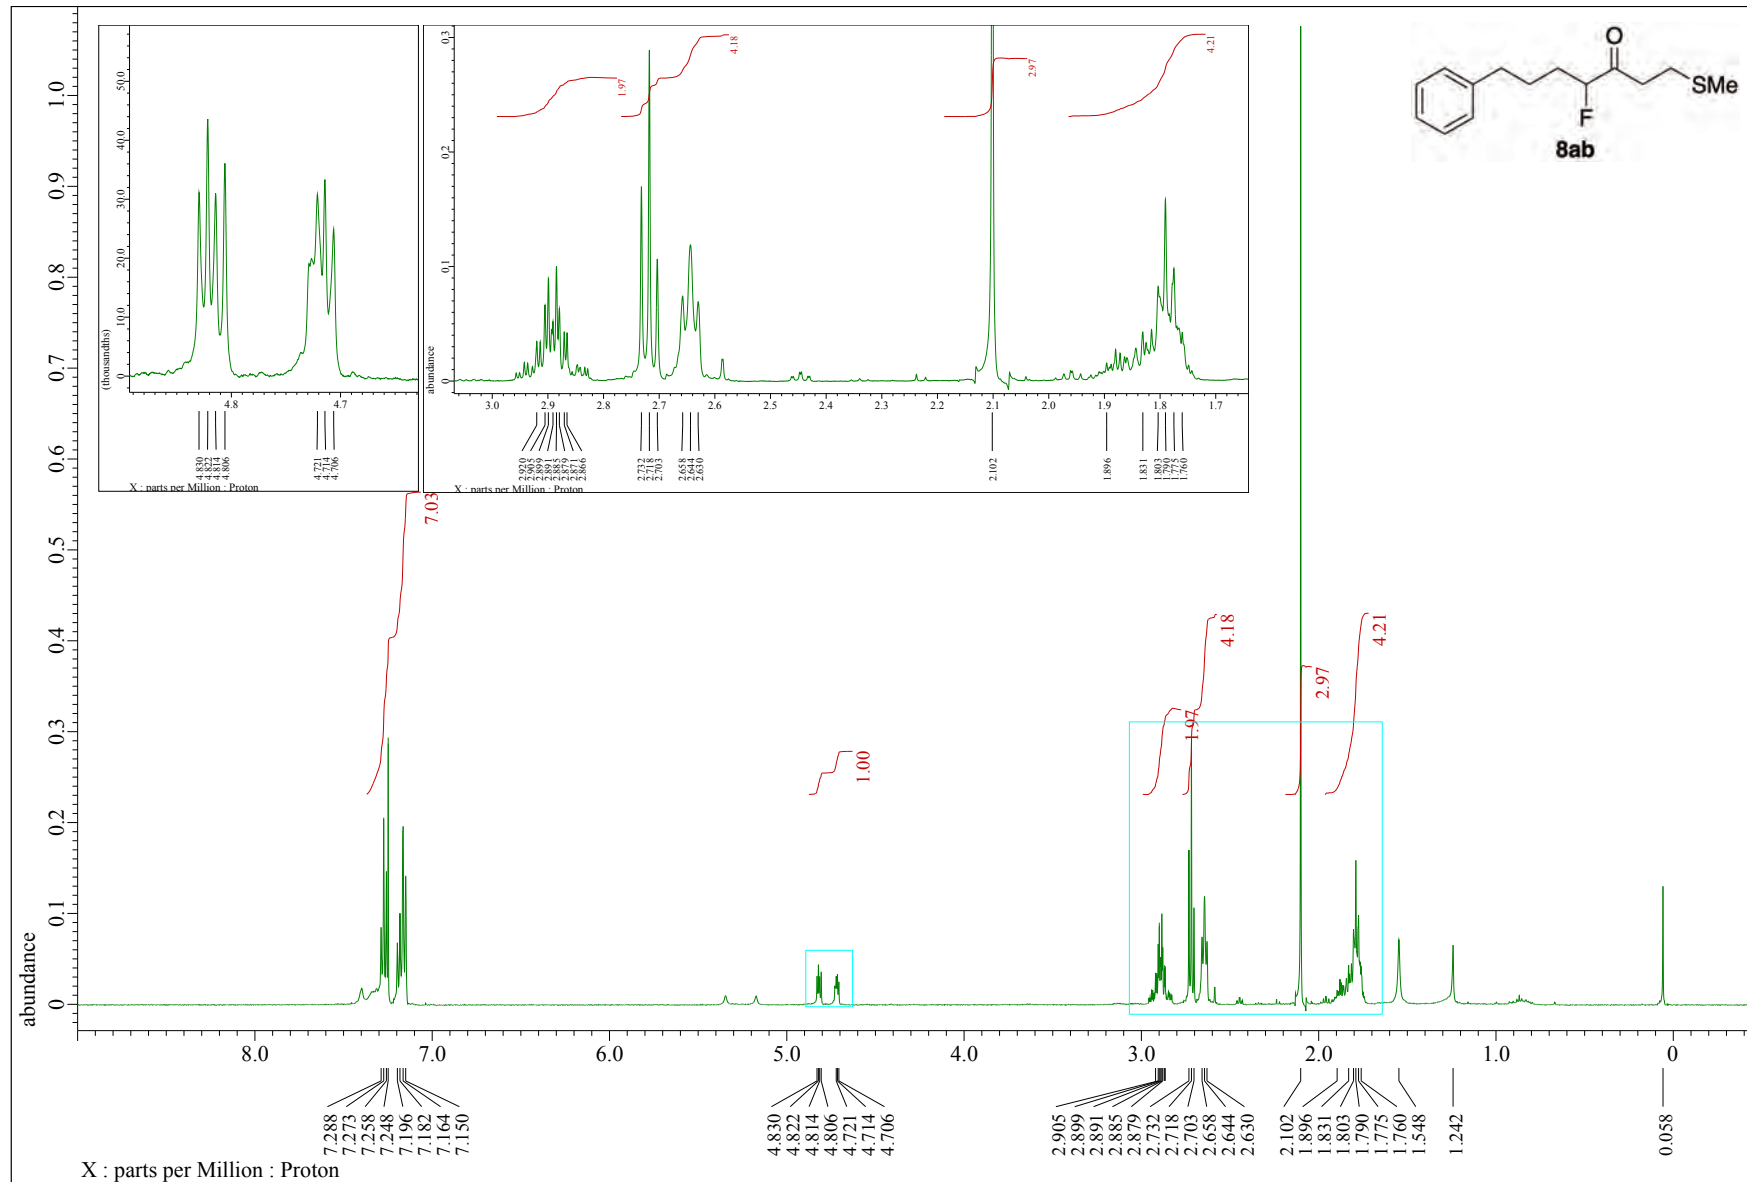

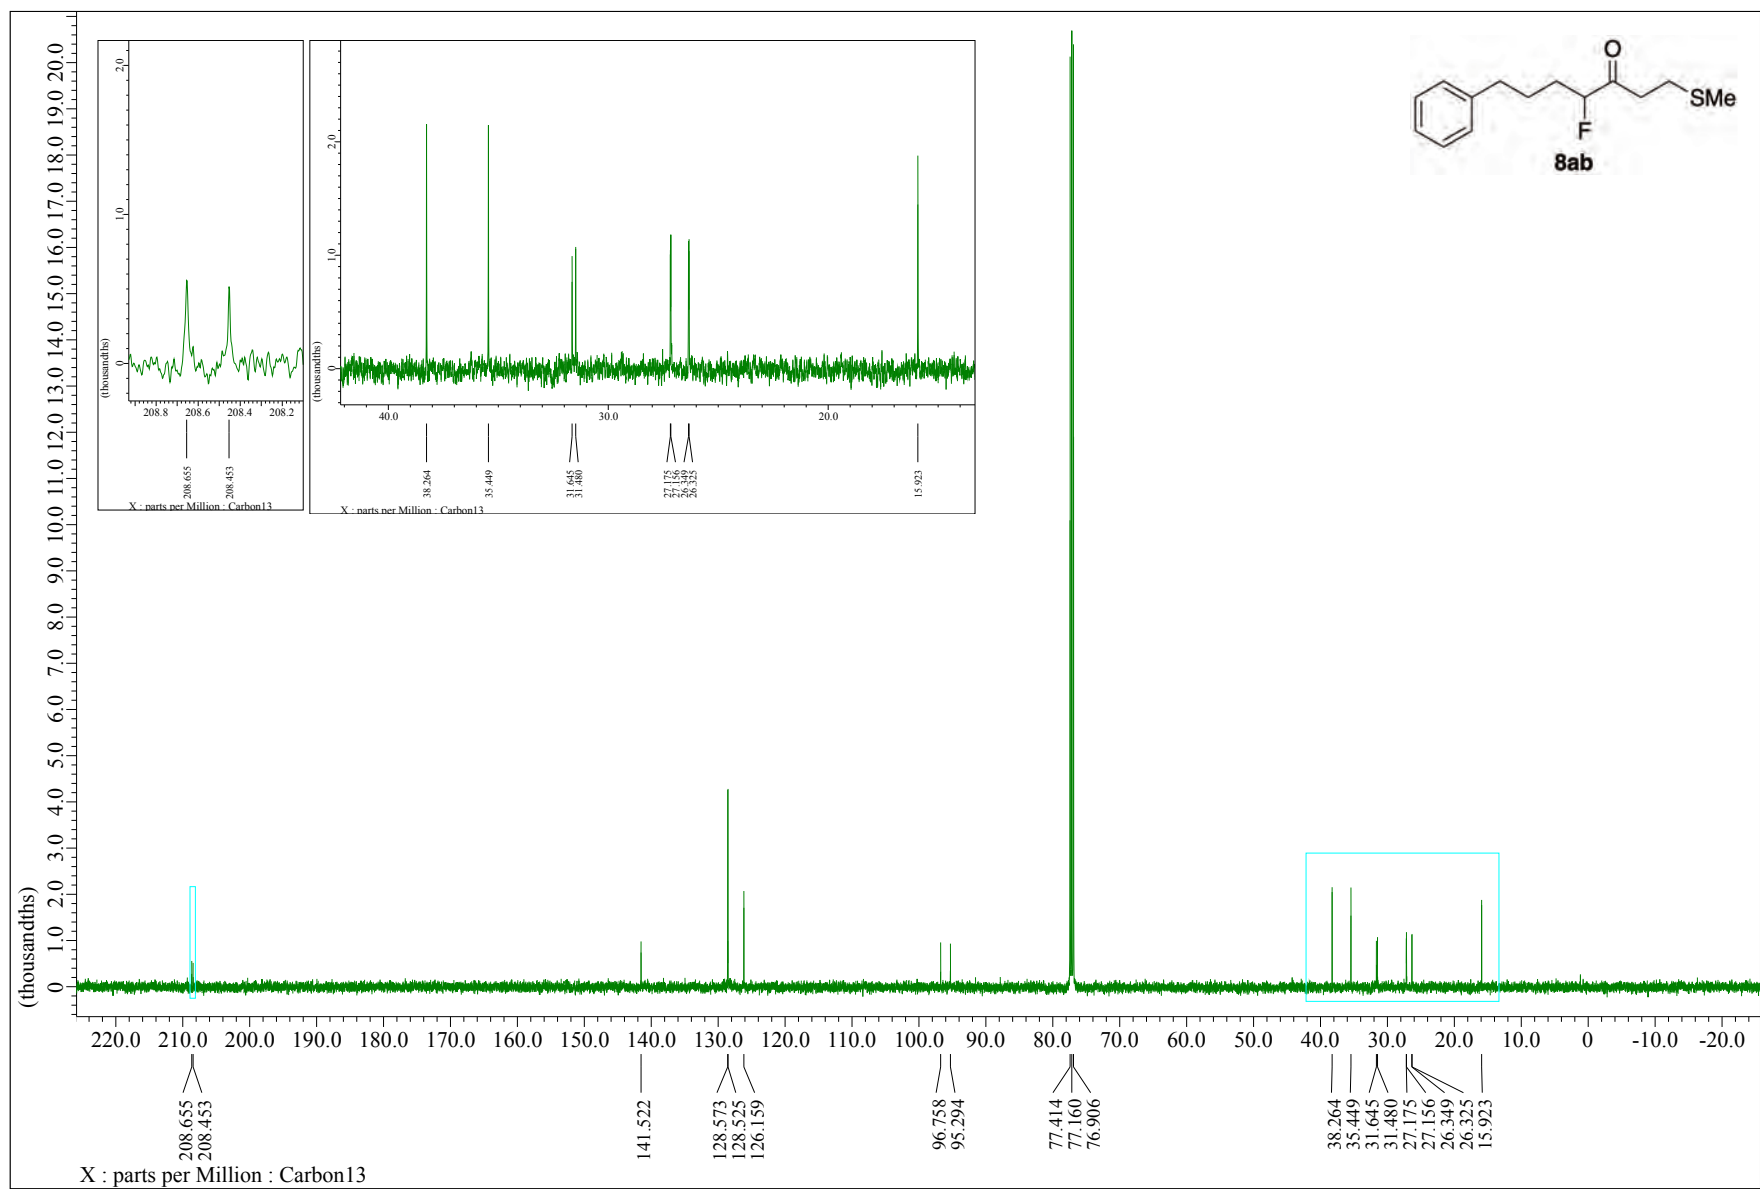

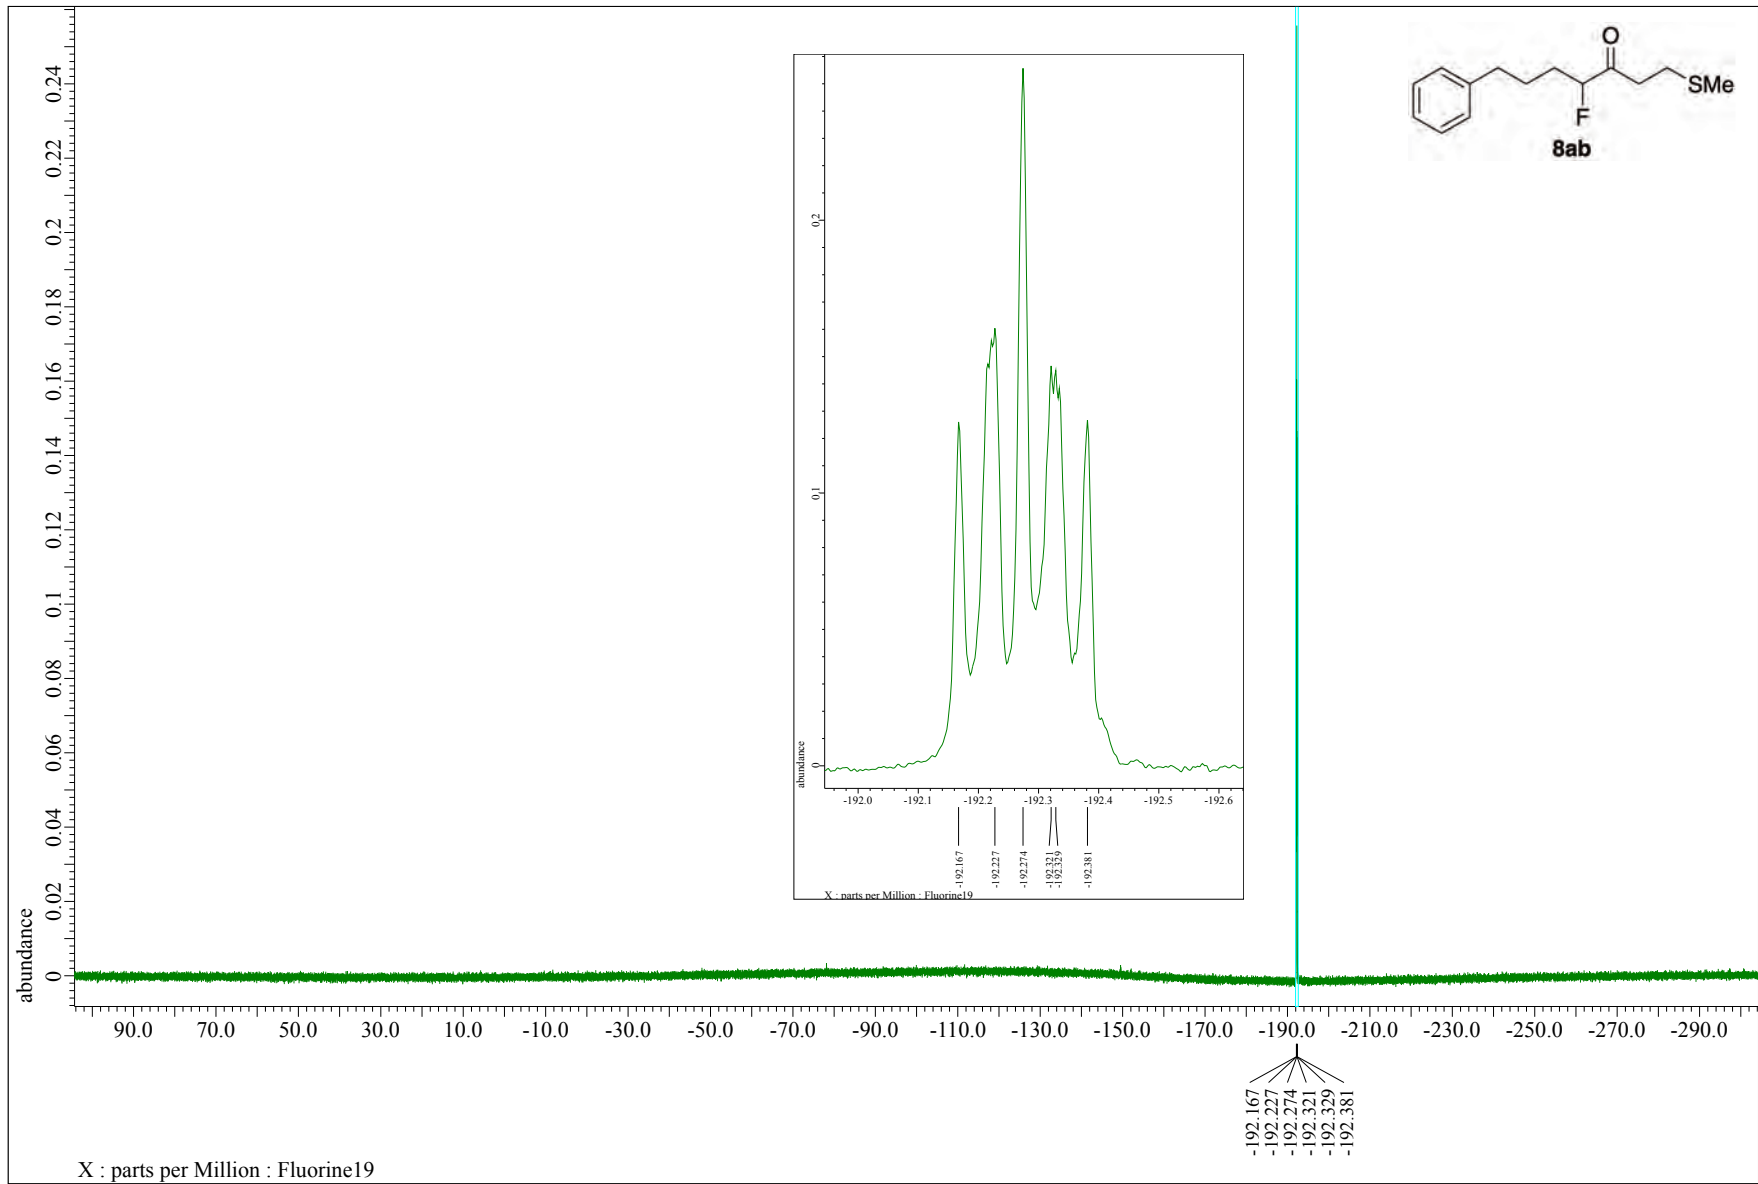

Sample No. : C:\Xcalibur\...\1228\BG\_231856\_8: \_

Instrument : Exactive Plus

Mobile phase solvent : MeOH

Operator name : hayashi harumi

Sample solvent : CHCl3

Date : 12/28/23 14:03:50

Instrumental method : C:\Xcalibur\methods\ESI\_100ul\S60\_100ul\_mz100\_1500pn.meth

Instrumental Analysis Division, Global Facility Center, Creative Research Institution, Hokkaido University

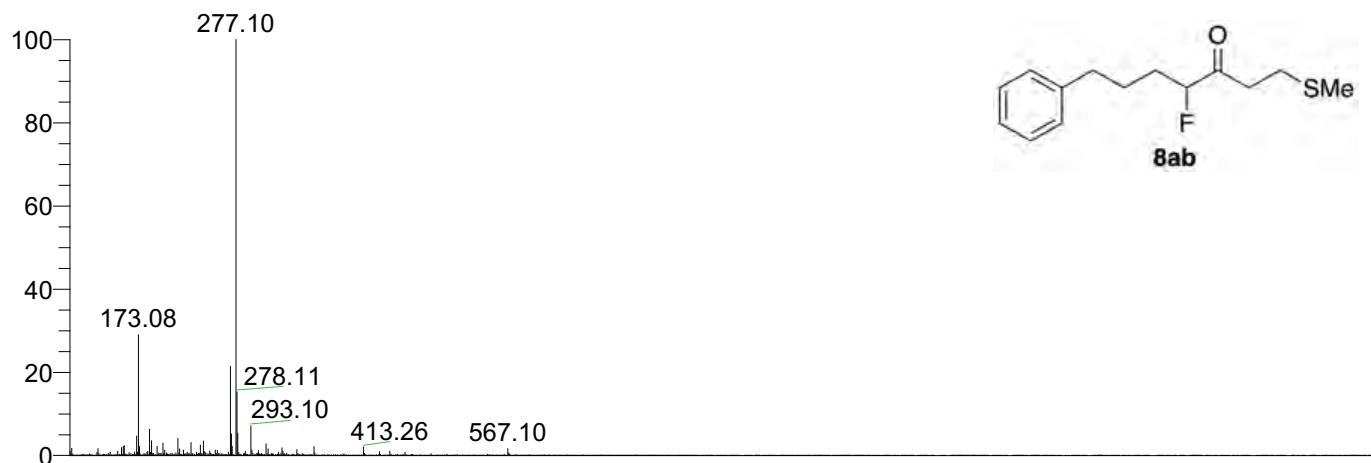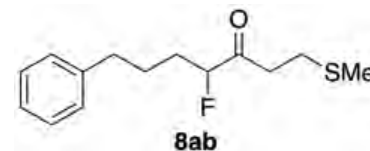

NL: 3.87E7  
BG\_231856\_8ab\_pn#  
18-31 RT: 0.31-0.50  
AV: 7 T: FTMS + c  
ESI Full ms  
[100.00-1500.00]

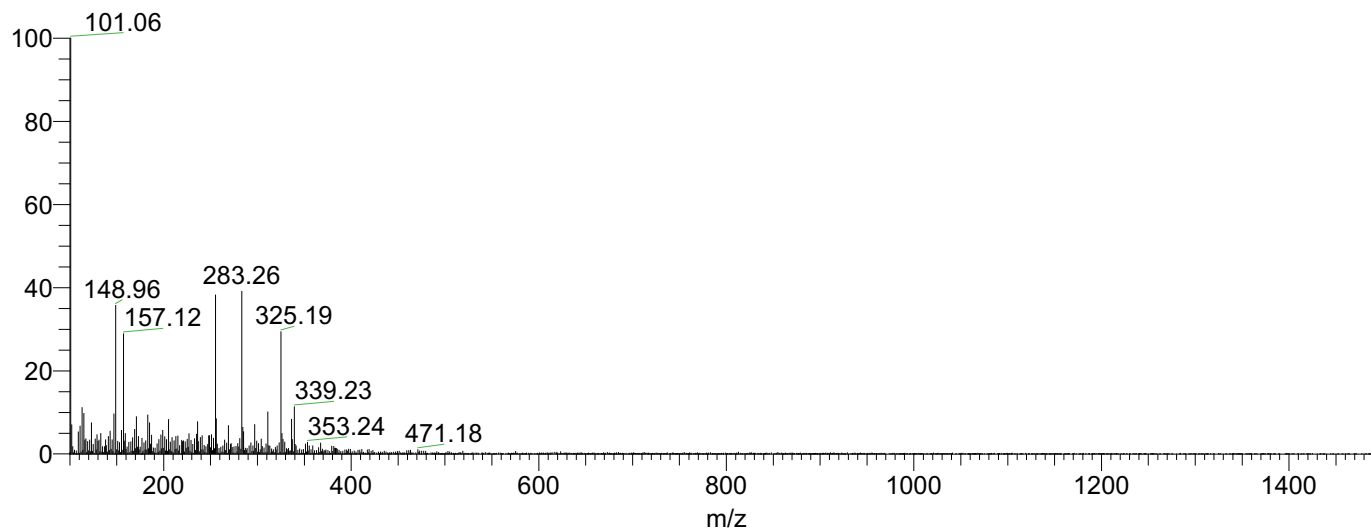

NL: 1.88E6  
BG\_231856\_8ab\_pn#  
18-31 RT: 0.30-0.49  
AV: 7 T: FTMS - c ESI  
Full ms  
[100.00-1500.00]



Sample No. : C:\Xcalibur\...1228\201006\_8ab\_pn

Instrument : Exactive Plus

Mobile phase solvent : MeOH

Operator name : hayashi harumi

Sample solvent : CHCl<sub>3</sub>

Date : 12/28/23 12:11:44

Instrumental method : C:\Xcalibur\methods\ESI\_100ul\S60\_100ul\_mz100\_1500pn.meth

Instrumental Analysis Division, Global Facility Center, Creative Research Institution, Hokkaido University

231856\_8ab\_pn#21-25 RT: 0.34-0.41 AV: 3 NL: 1.41E7

T: FTMS + p ESI Full ms [100.0000-1500.0000]

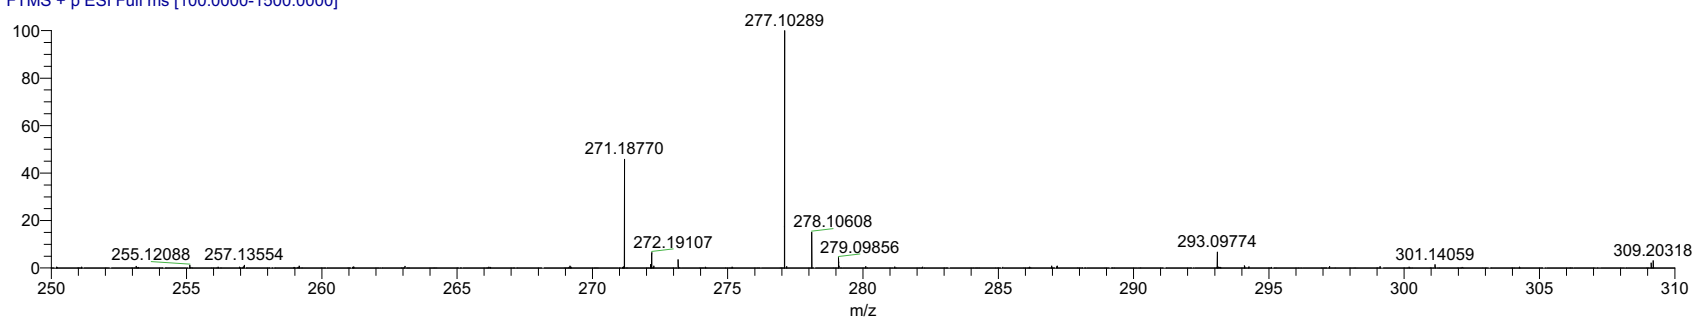

231856\_8ab\_pn#25-28 RT: 0.41-0.44 AV: 2 NL: 1.35E7

T: FTMS + p ESI Full ms [100.0000-1500.0000]

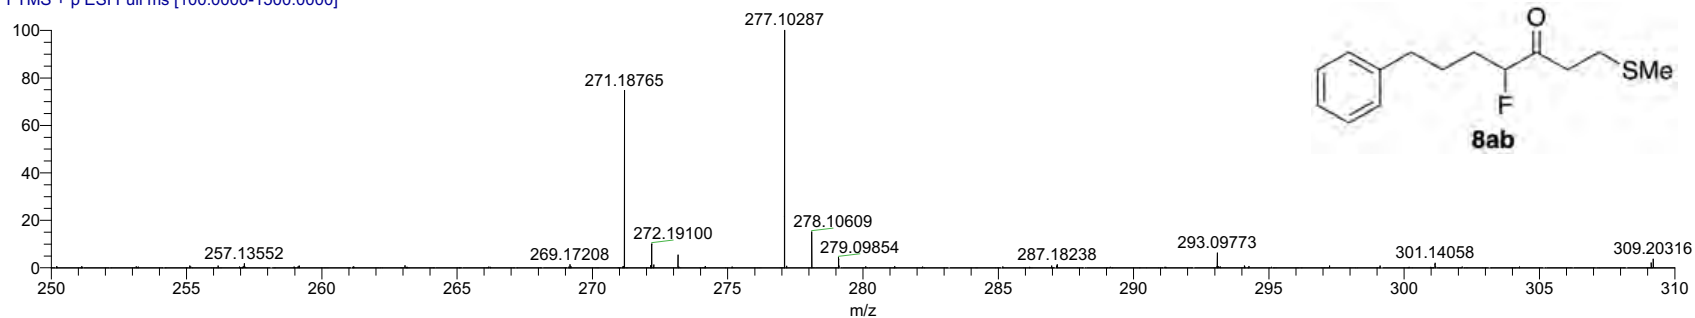

231856\_8ab\_pn#28-31 RT: 0.47-0.50 AV: 2 NL: 5.22E6

T: FTMS + p ESI Full ms [100.0000-1500.0000]

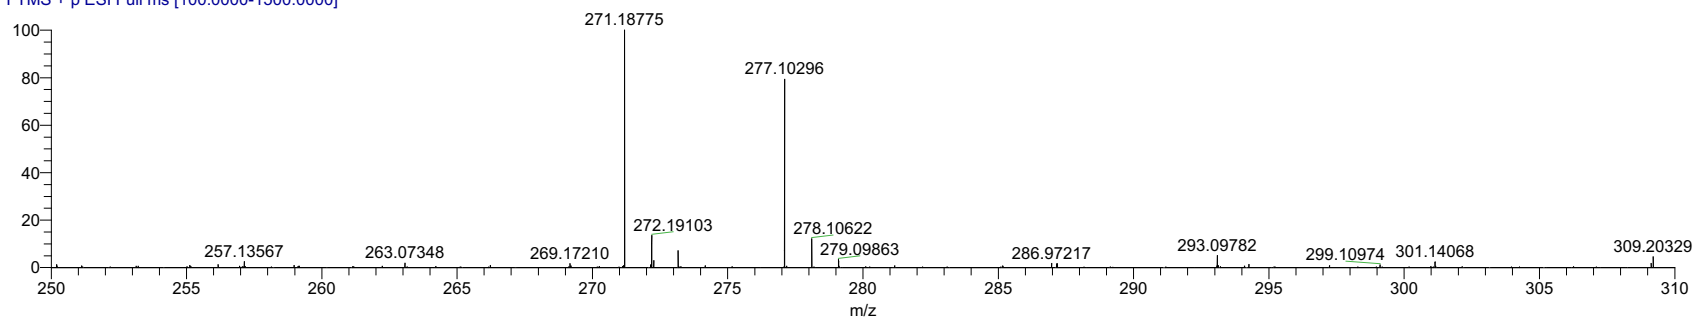

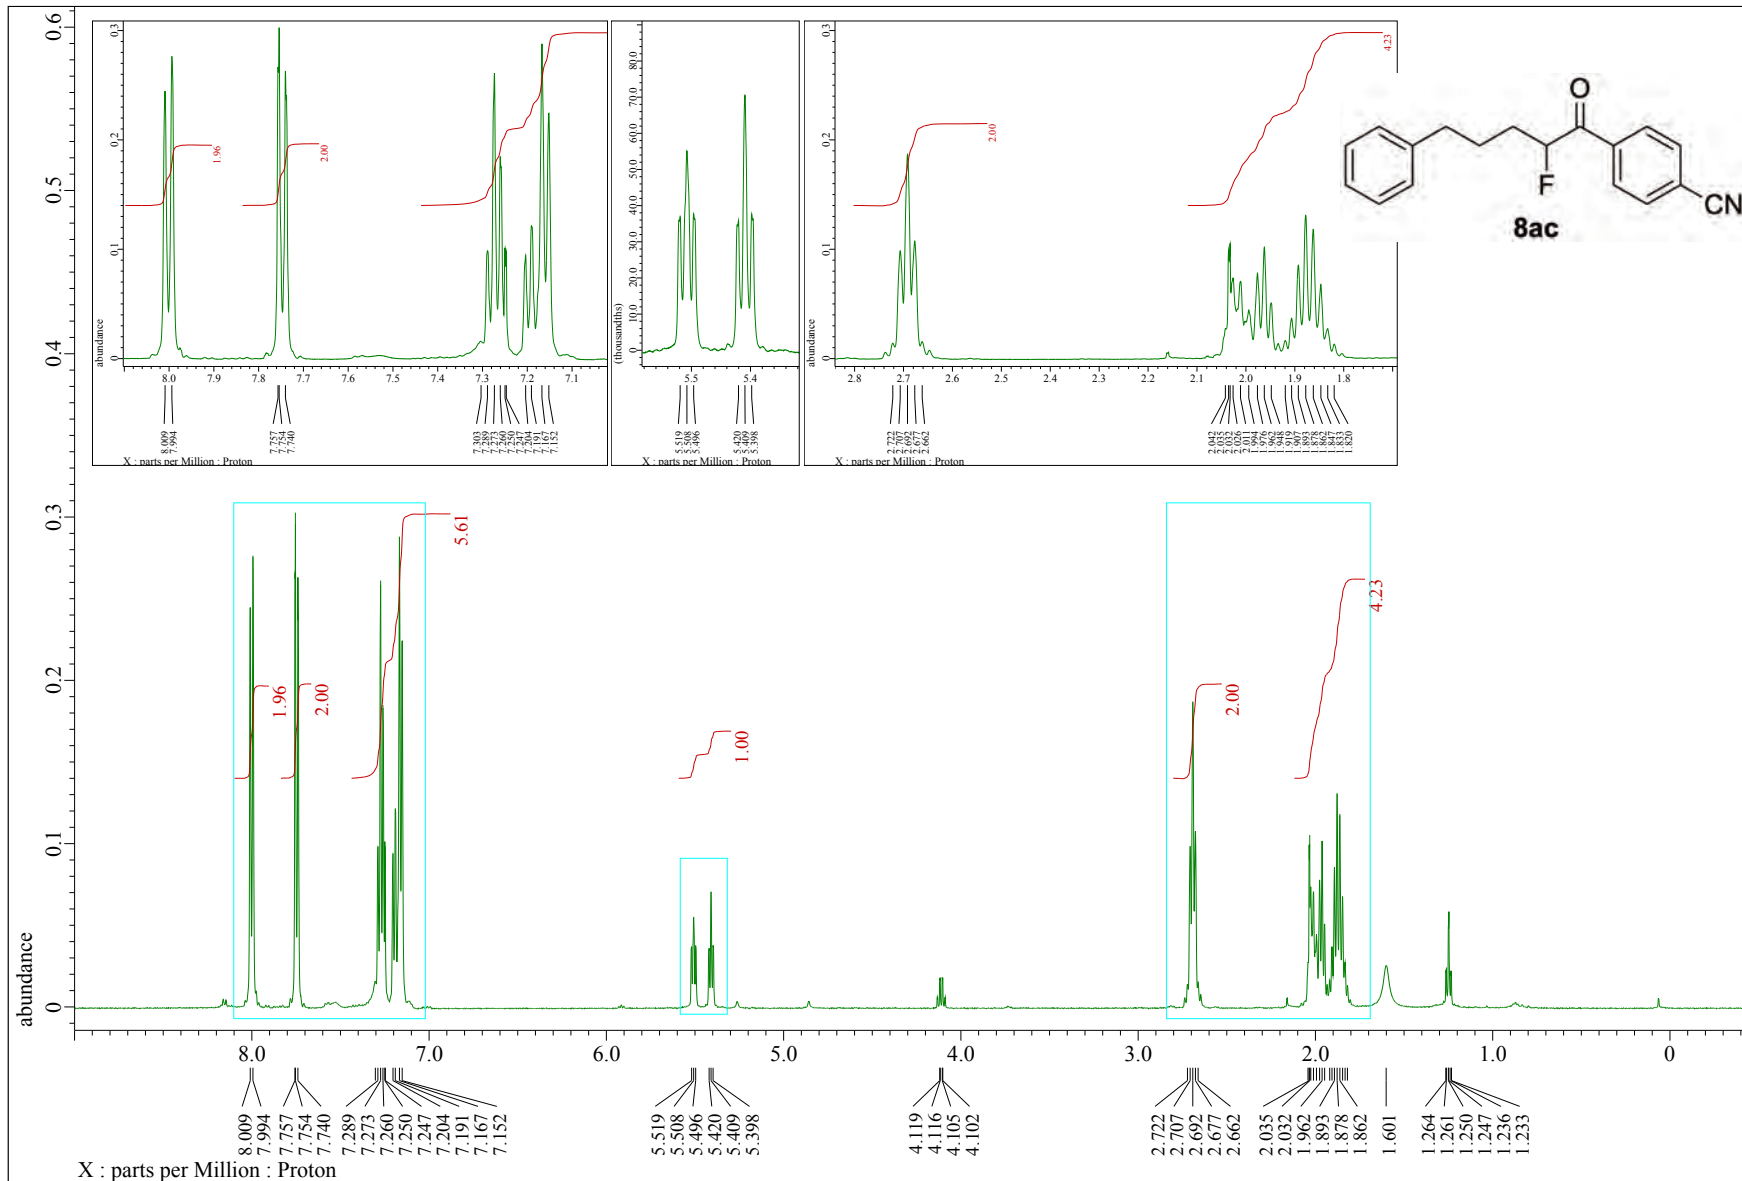

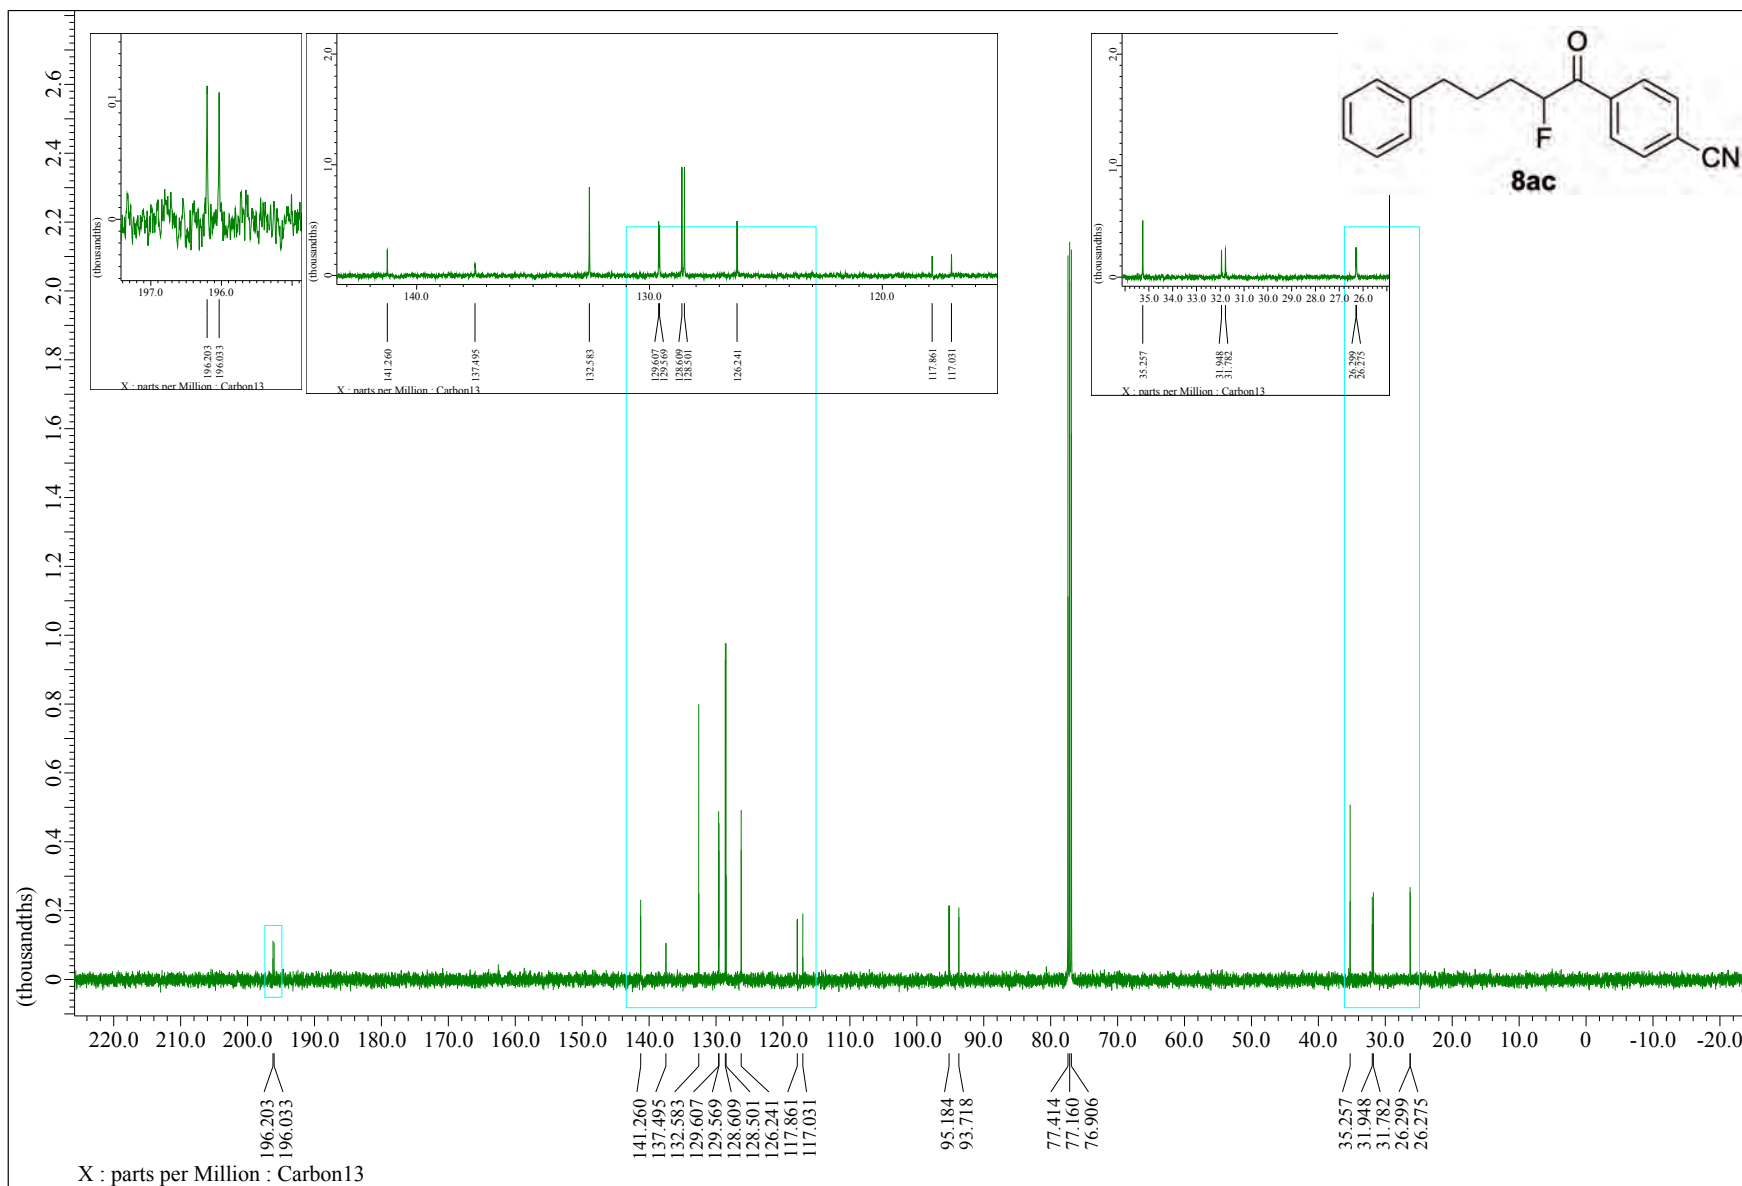

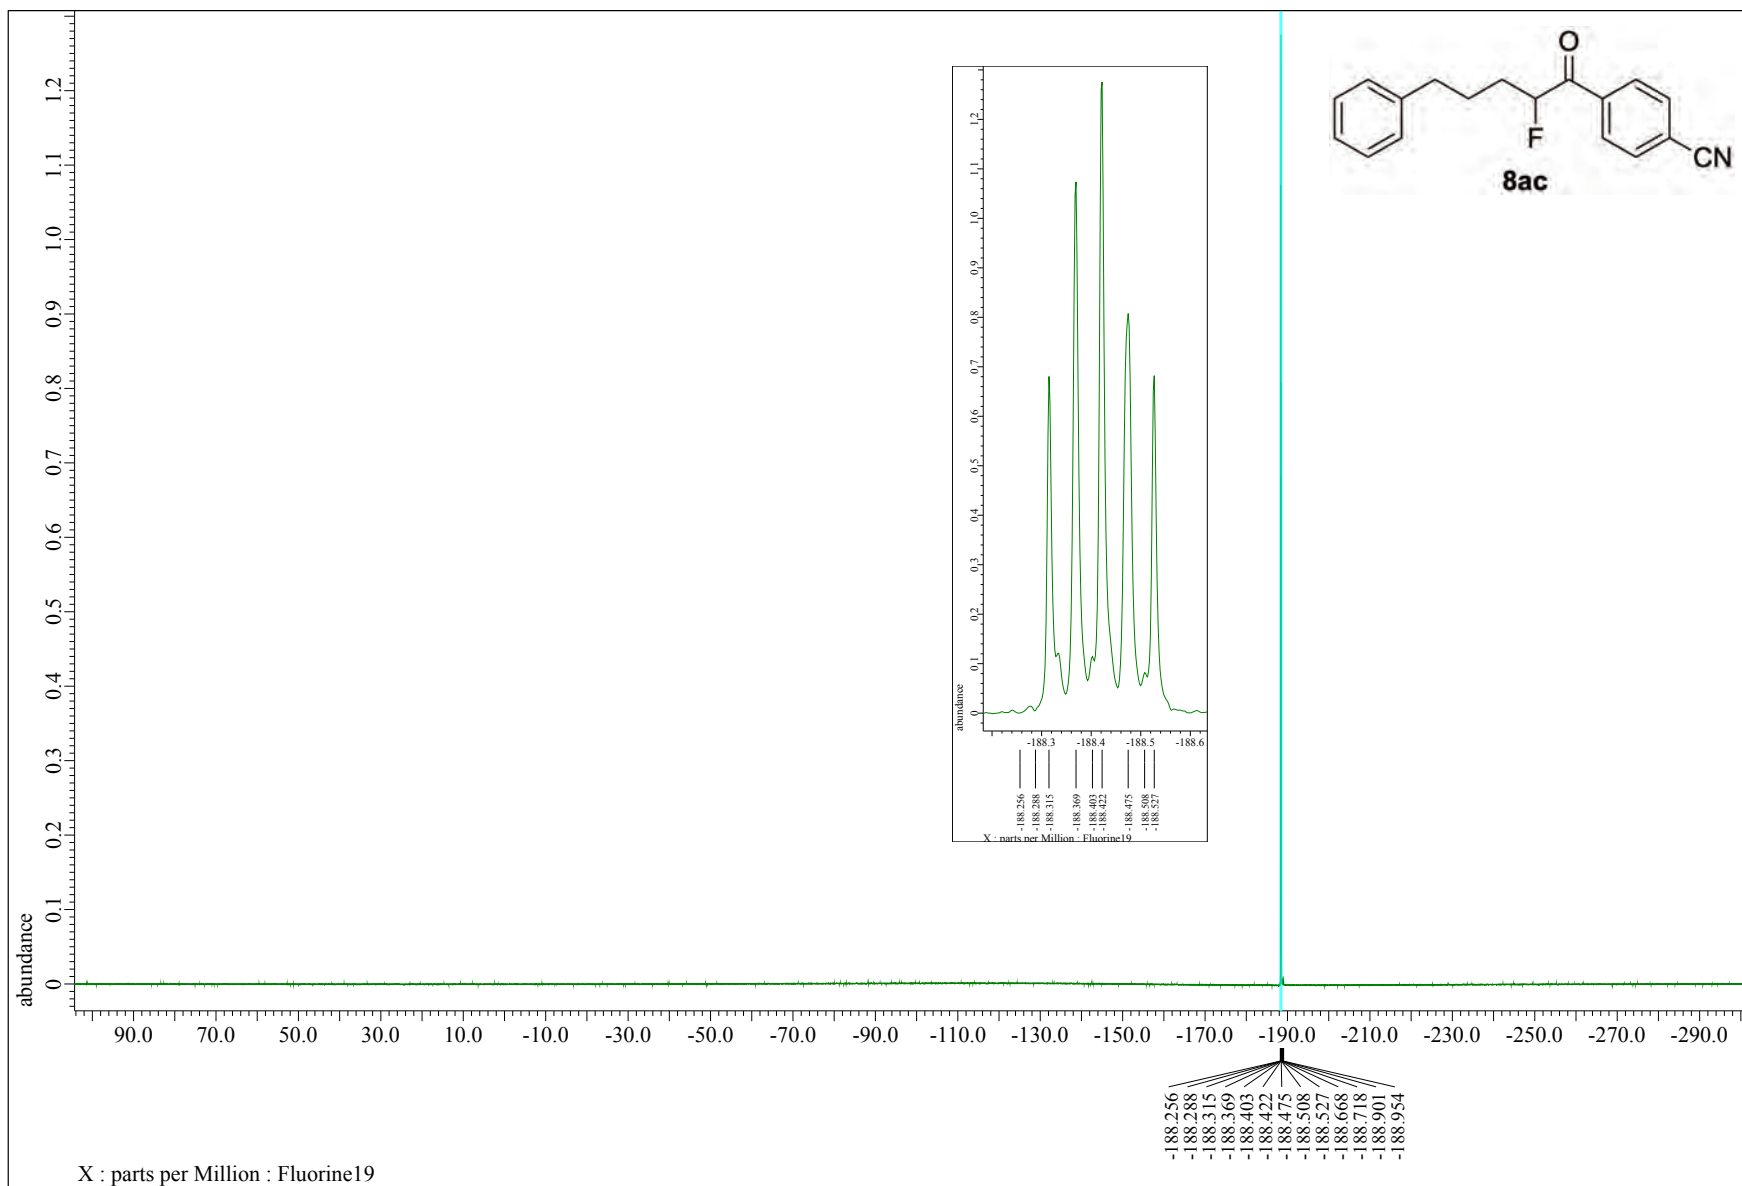

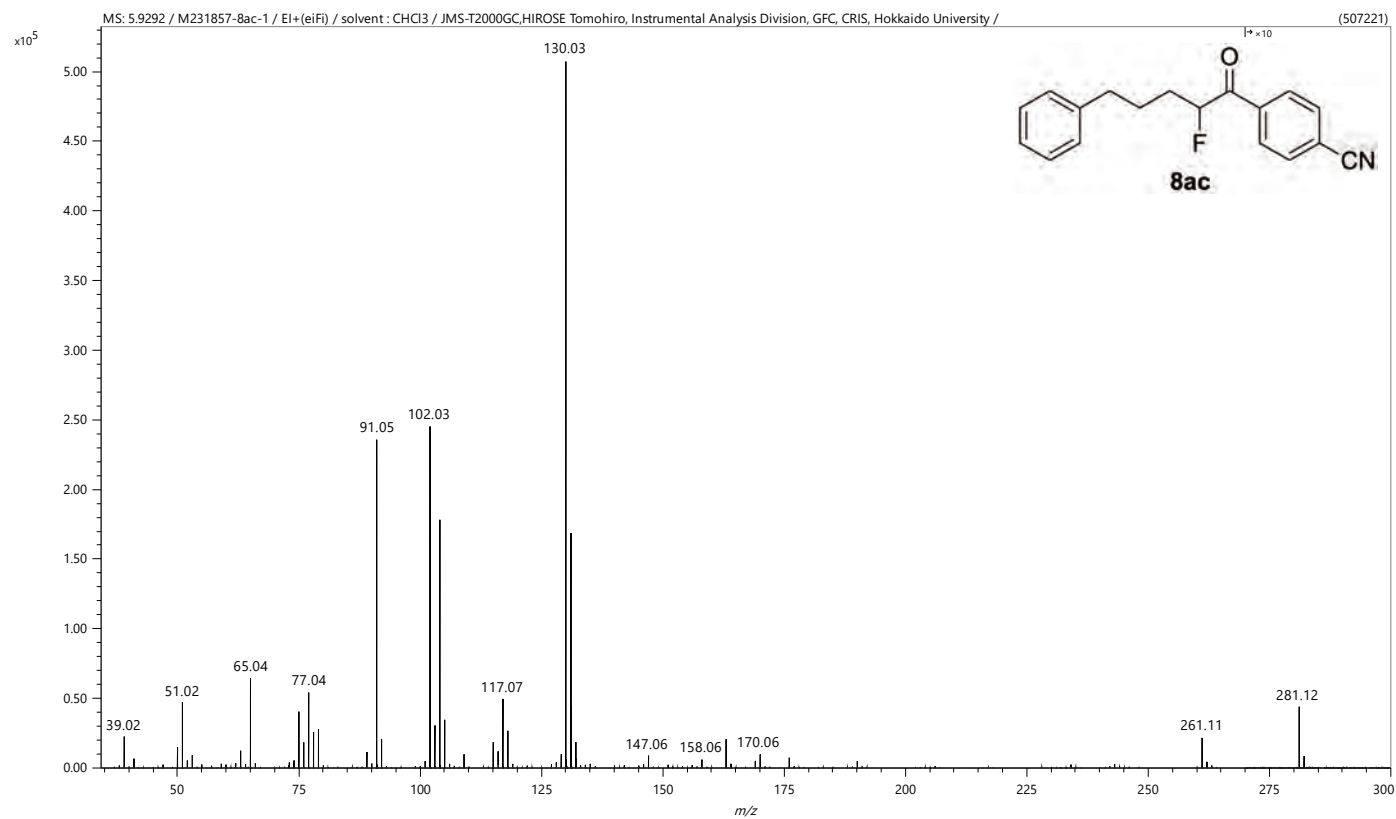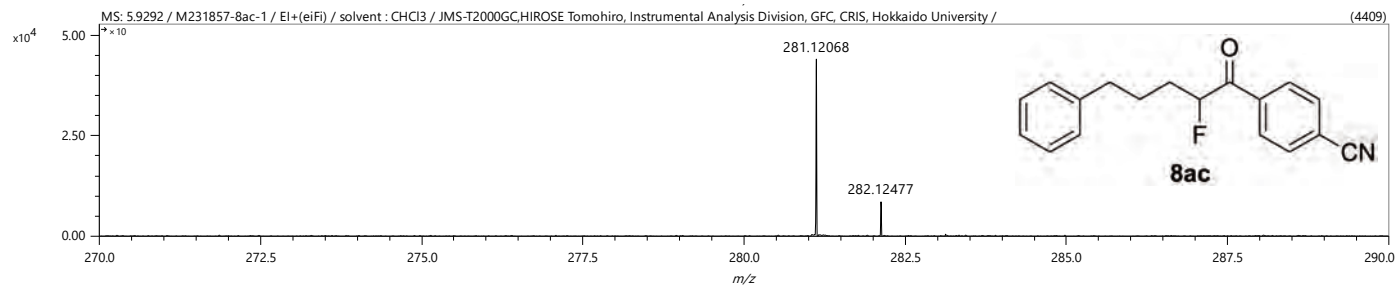

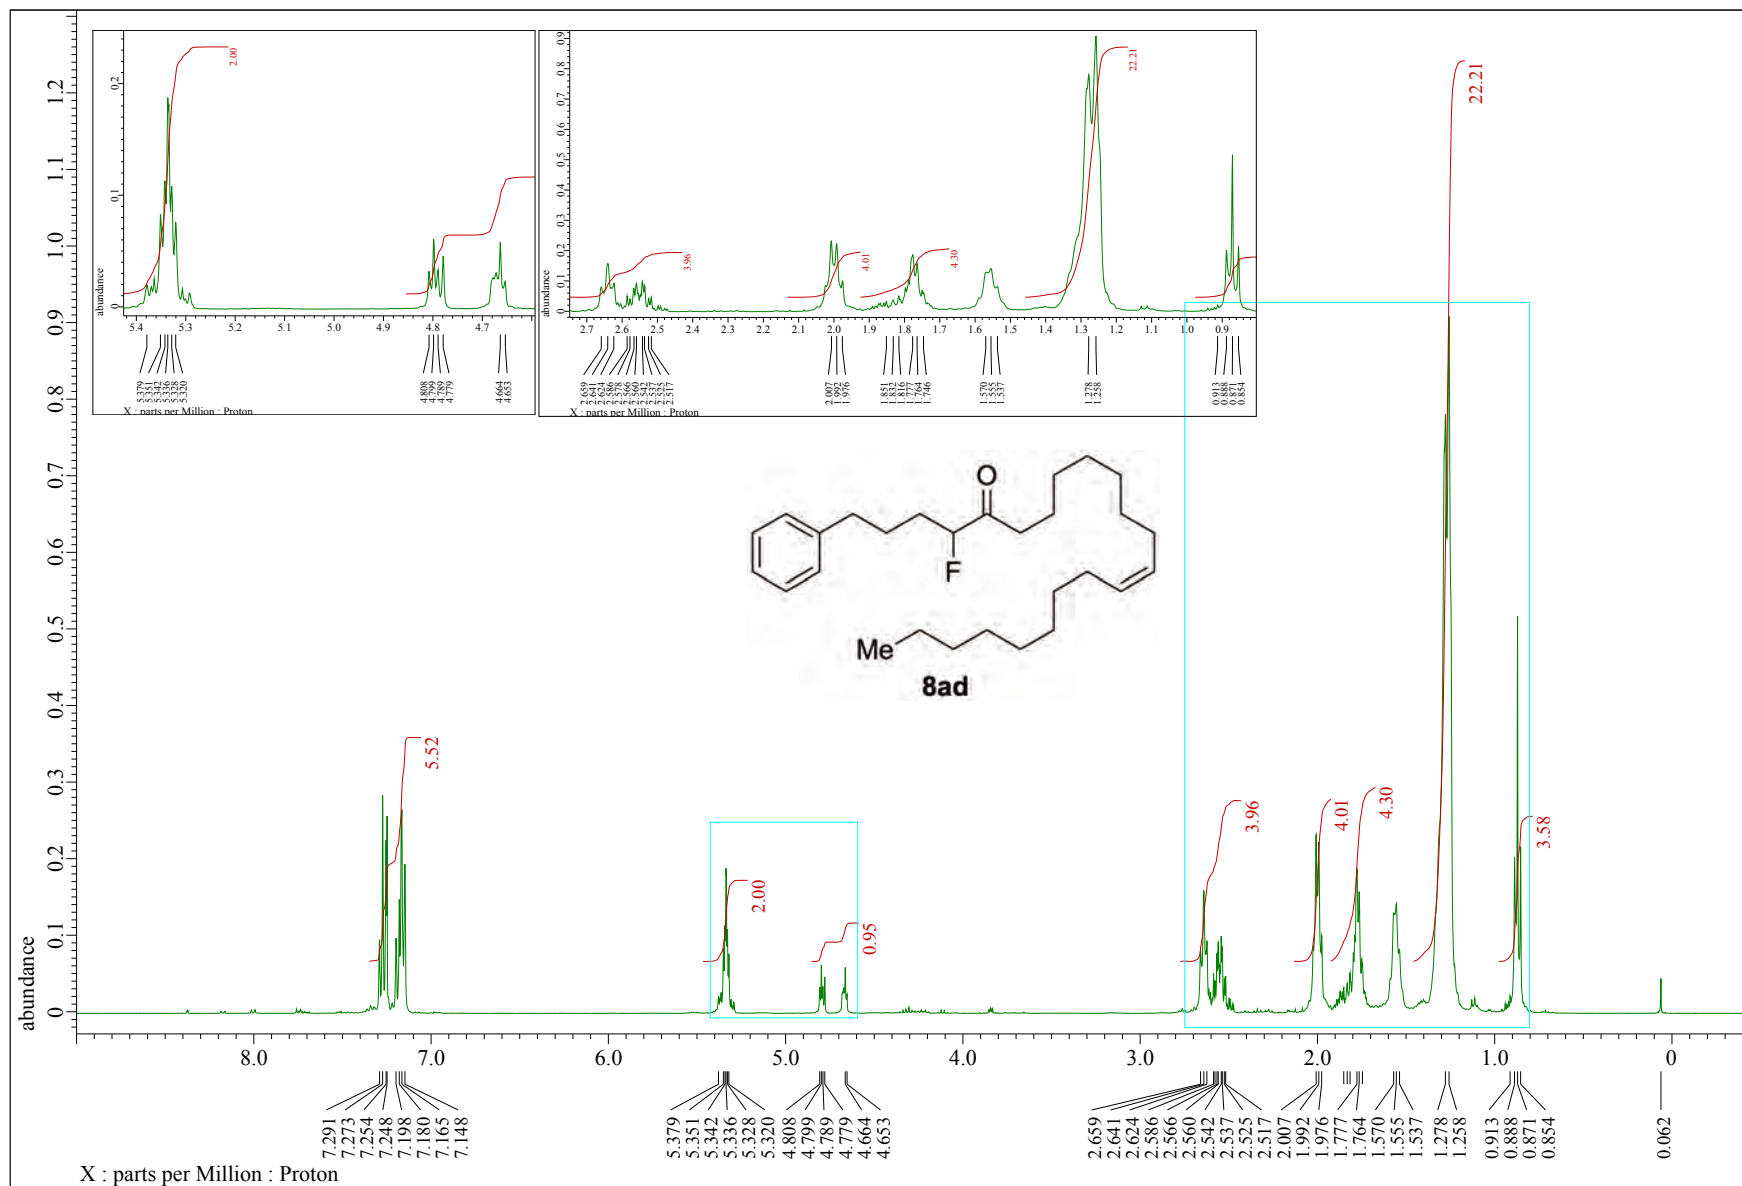

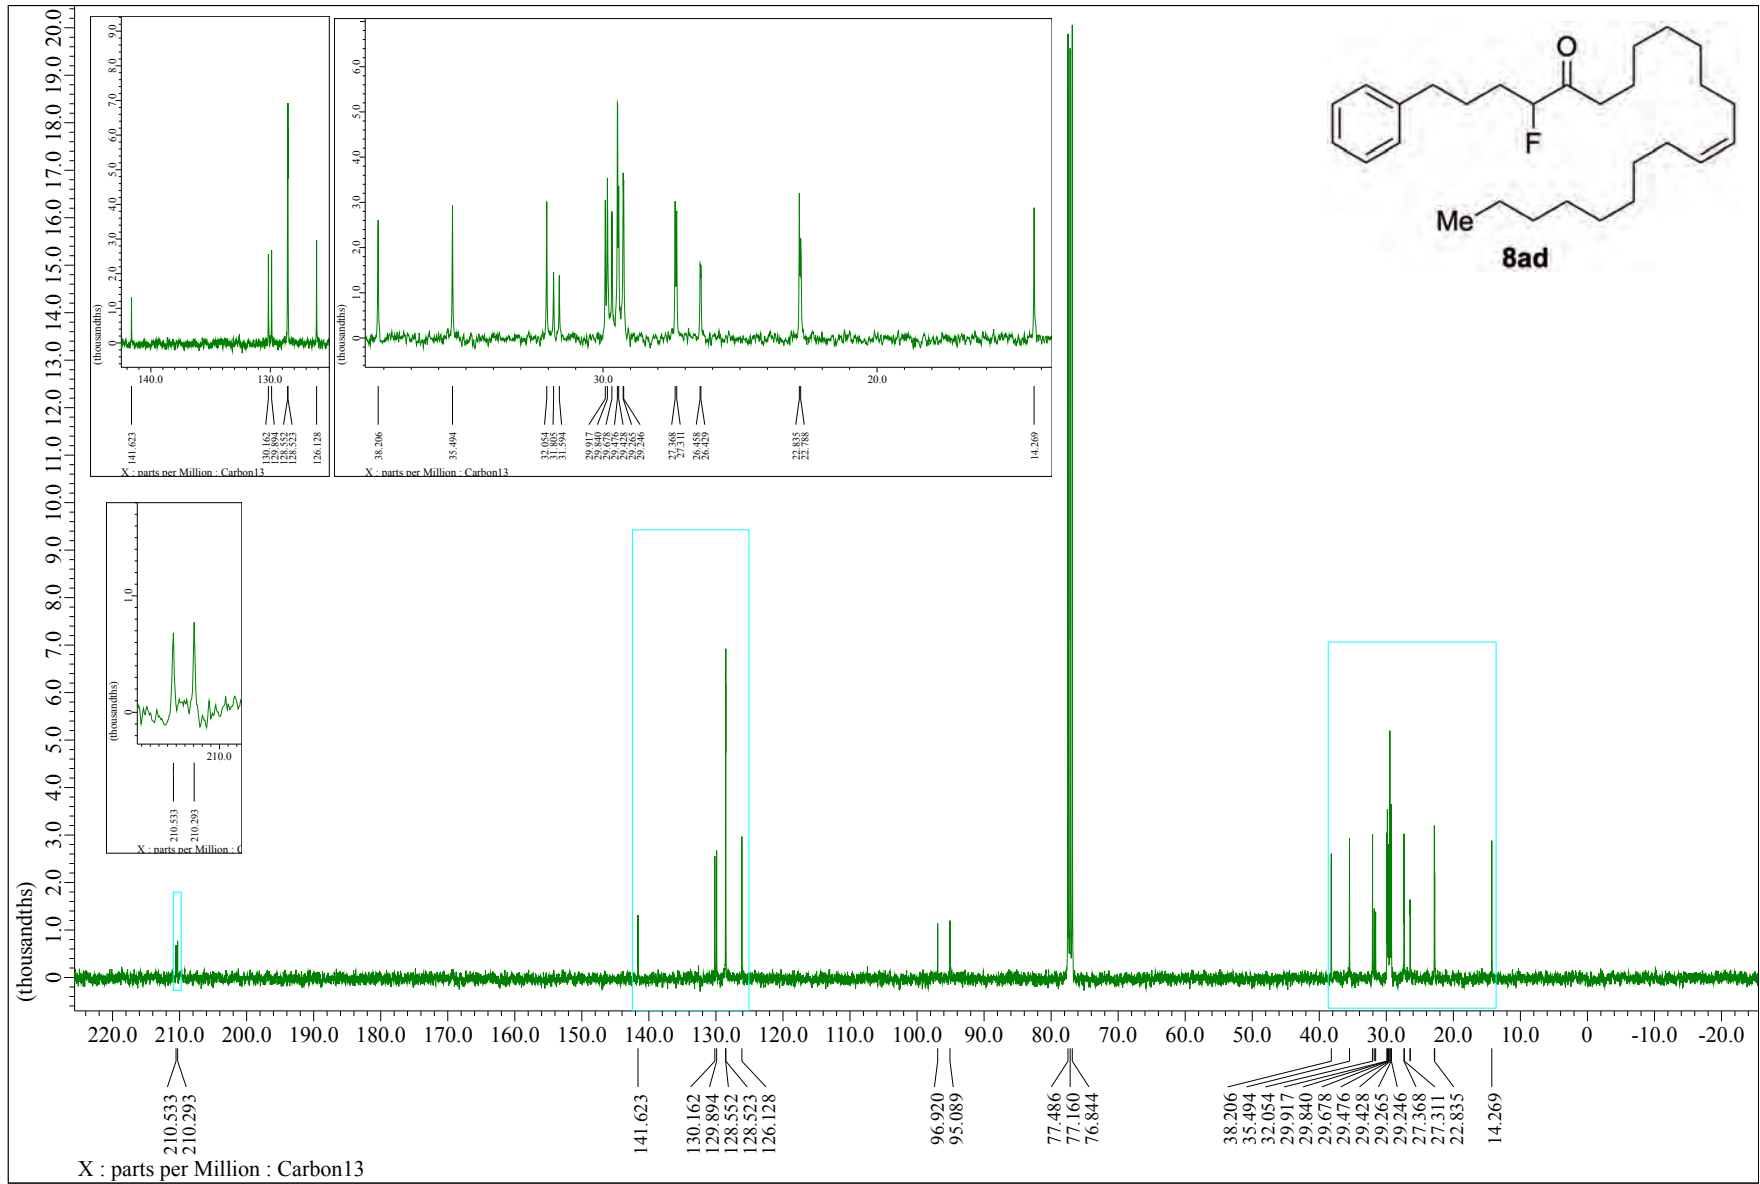

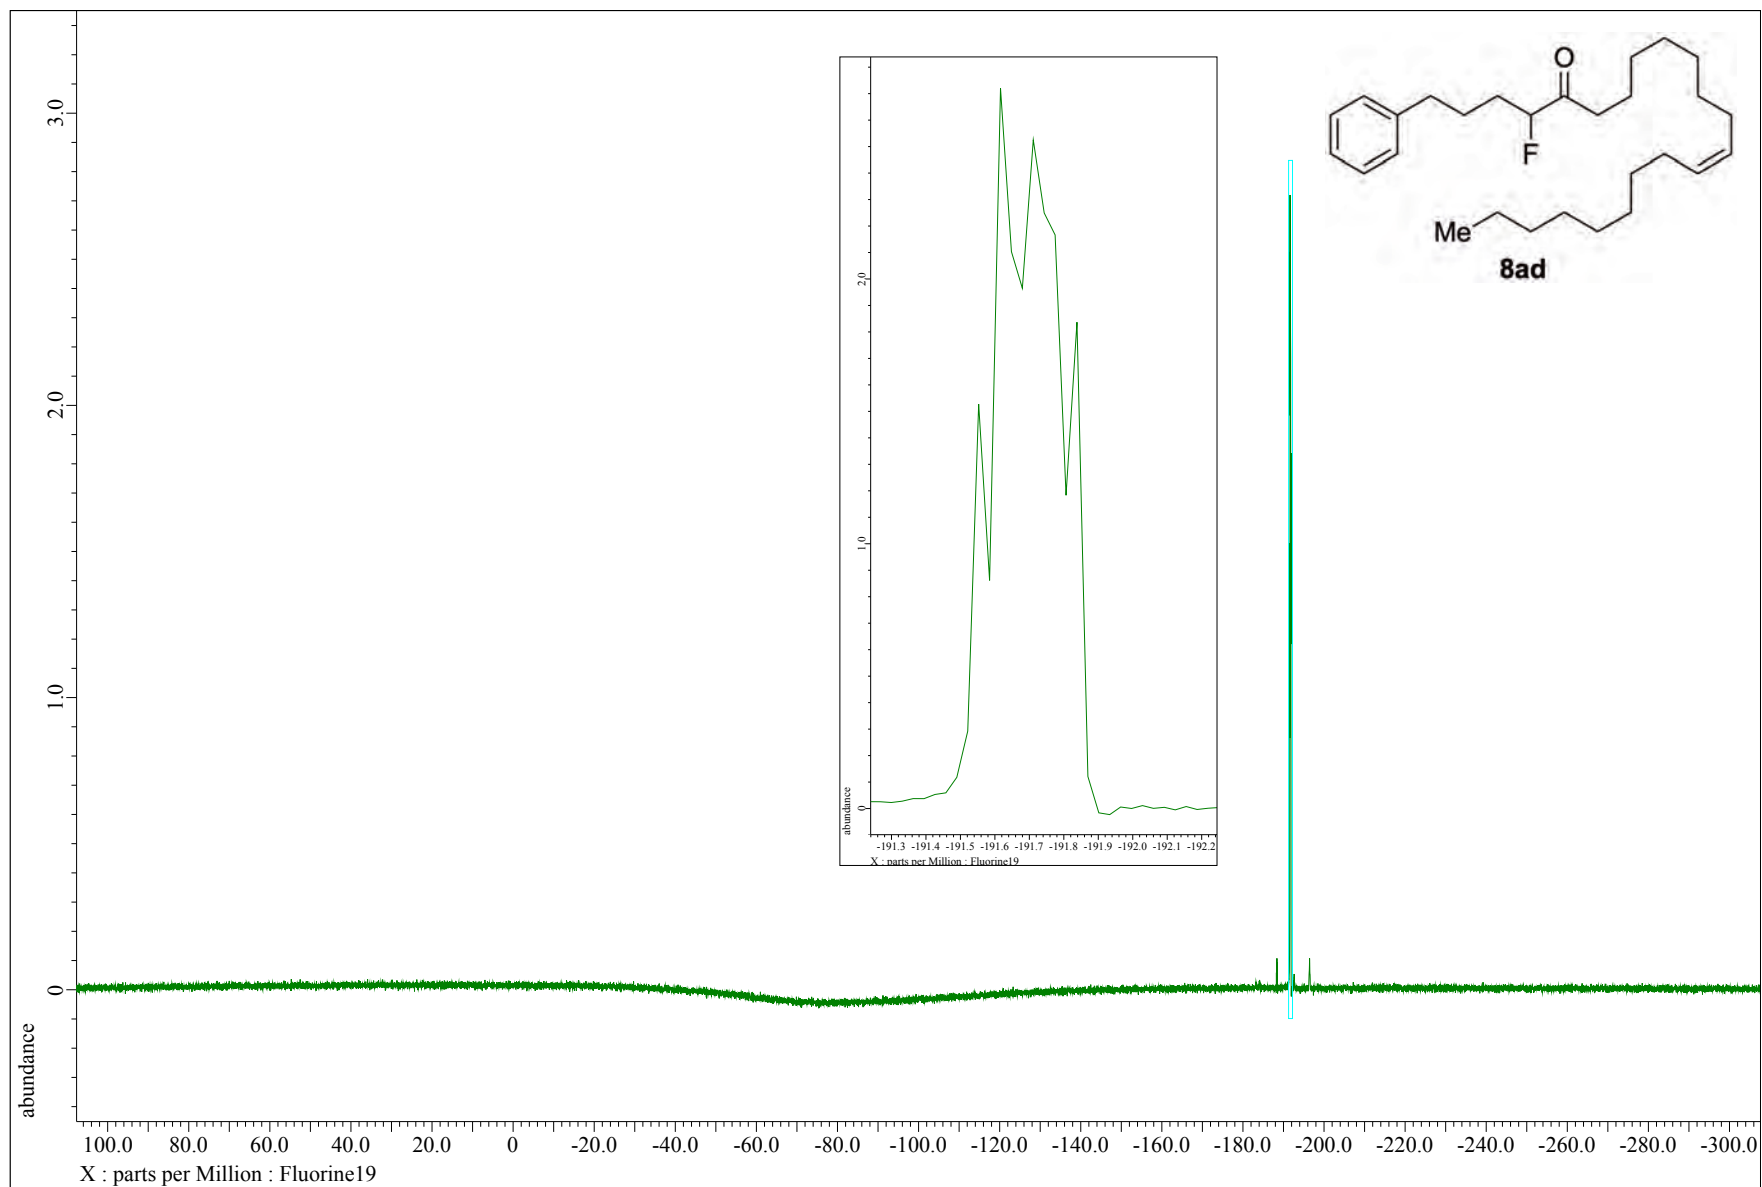



Sample No. : C:\Xcalibur\...1228\BG\_231858\_8: \_

Instrument : Exactive Plus

Mobile phase solvent : MeOH

Operator name : hayashi harumi

Sample solvent : CHCl3

Date : 12/28/23 14:27:48

Instrumental method : C:\Xcalibur\methods\ESI\_100ul\S60\_100ul\_mz150\_2000pn.meth

Instrumental Analysis Division, Global Facility Center, Creative Research Institution, Hokkaido University

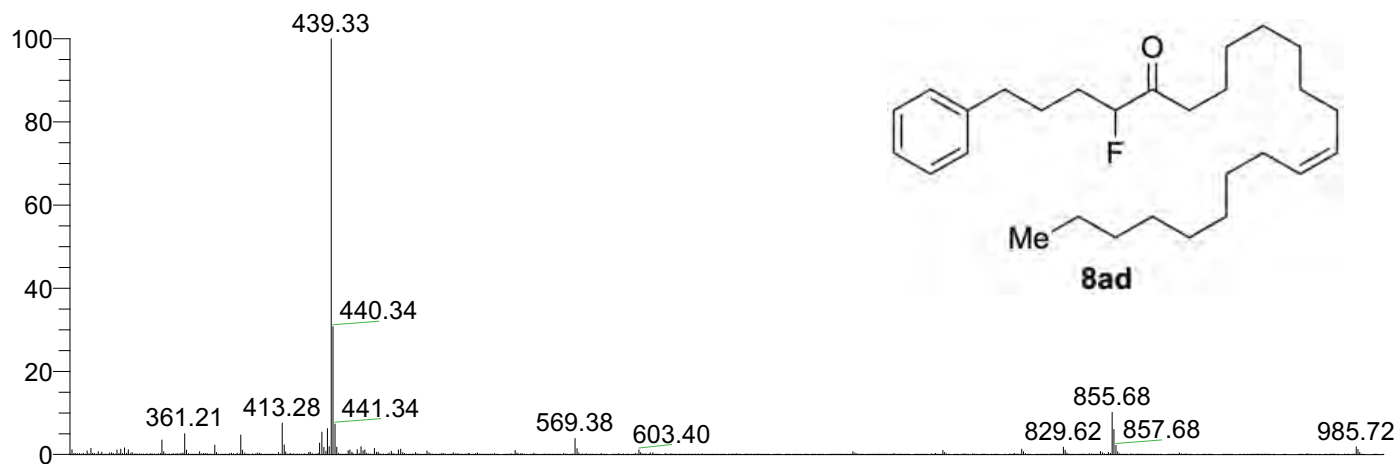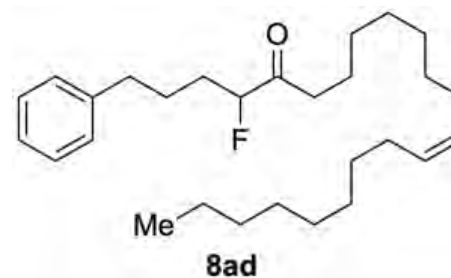

NL: 9.46E7  
BG\_231858\_8ad\_pn#  
18-31 RT: 0.31-0.49  
AV: 7 T: FTMS + c  
ESI Full ms  
[150.00-2000.00]

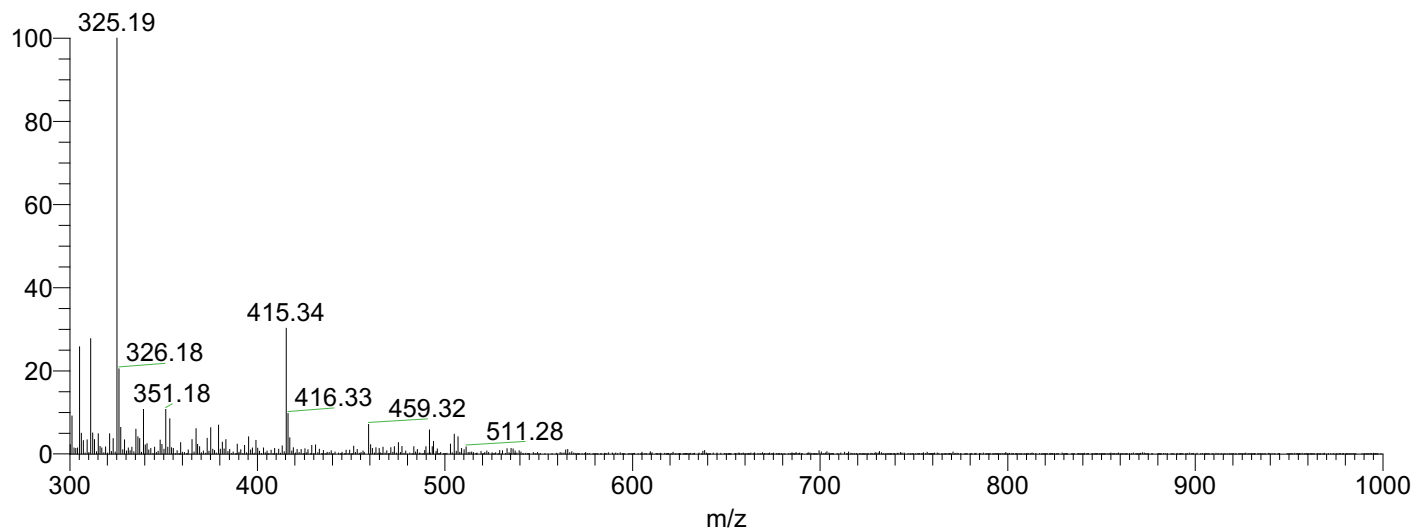

NL: 4.38E6  
BG\_231858\_8ad\_pn#  
18-31 RT: 0.30-0.48  
AV: 7 T: FTMS - c ESI  
Full ms  
[150.00-2000.00]

Sample No. : C:\Xcalibur\...1228\201808\_8ad\_pn

Instrument : Exactive Plus

Mobile phase solvent : MeOH

Operator name : hayashi harumi

Sample solvent : CHCl<sub>3</sub>

Date : 12/28/23 12:22:12

Instrumental method : C:\Xcalibur\methods\ESI\_100ul\S60\_100ul\_mz150\_2000pn.meth

Instrumental Analysis Division, Global Facility Center, Creative Research Institution, Hokkaido University

231858\_8ad\_pn#21-25 RT: 0.34-0.40 AV: 3 NL: 2.77E7

T: FTMS + p ESI Full ms [150.0000-2000.0000]

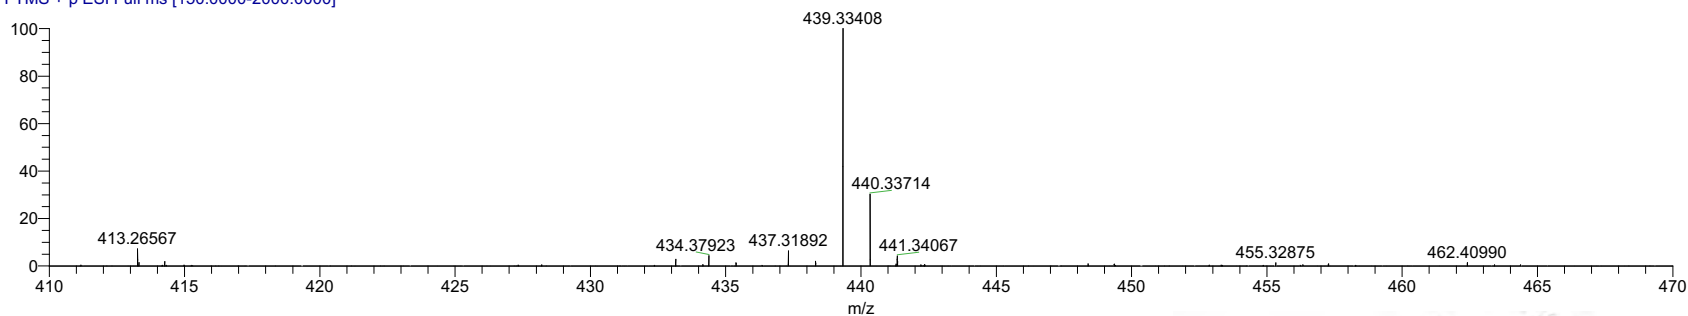

231858\_8ad\_pn#25-28 RT: 0.40-0.43 AV: 2 NL: 3.41E7

T: FTMS + p ESI Full ms [150.0000-2000.0000]

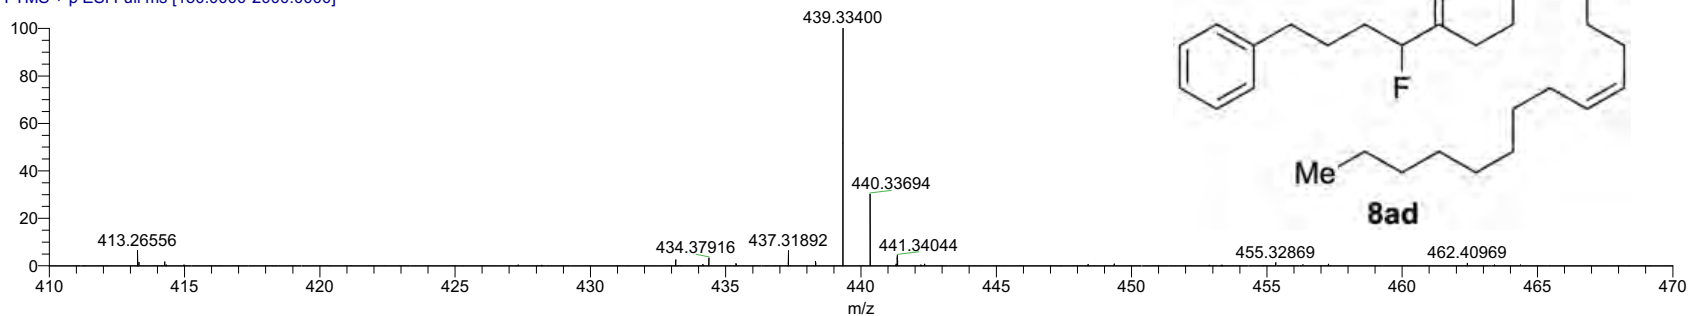

231858\_8ad\_pn#29-32 RT: 0.46-0.49 AV: 2 NL: 1.73E7

T: FTMS + p ESI Full ms [150.0000-2000.0000]

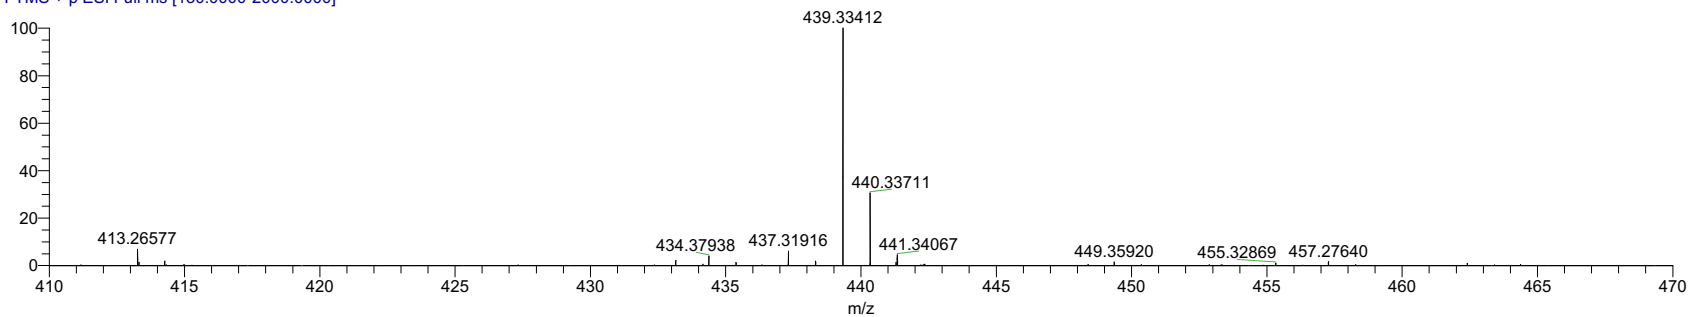

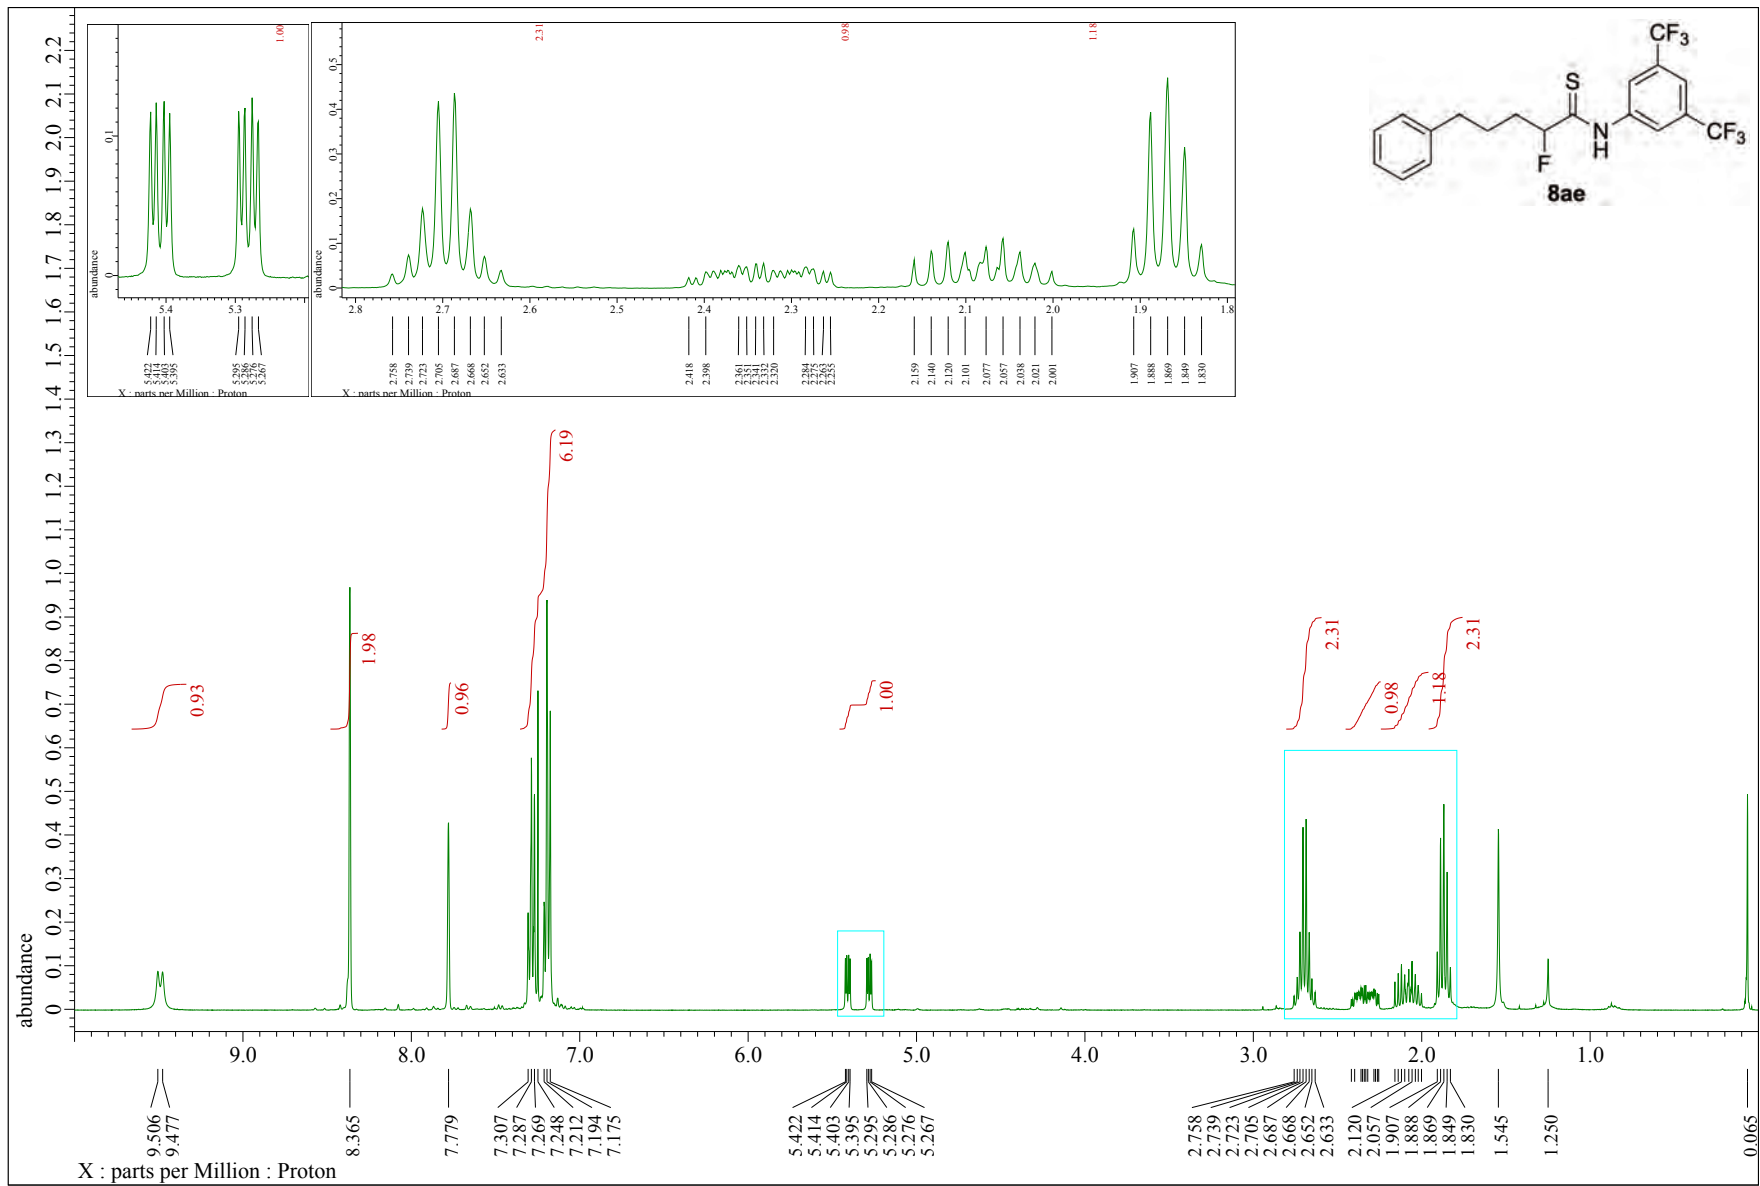

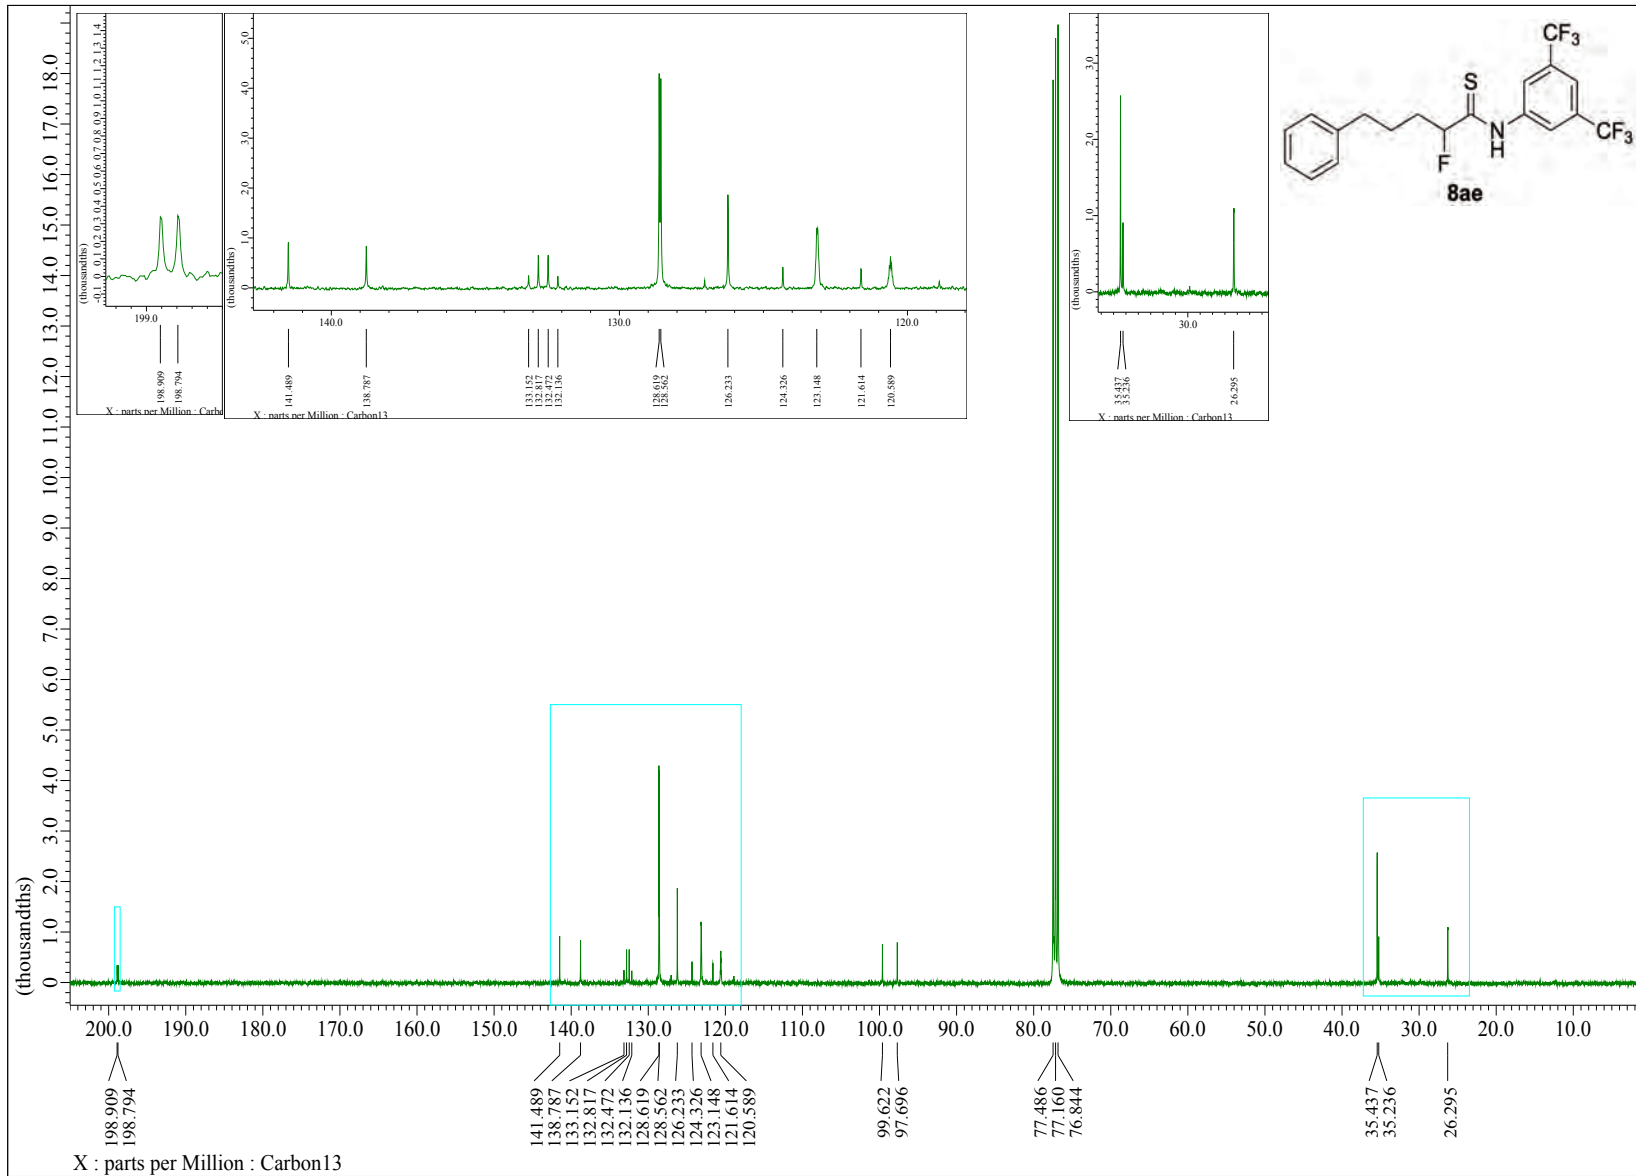

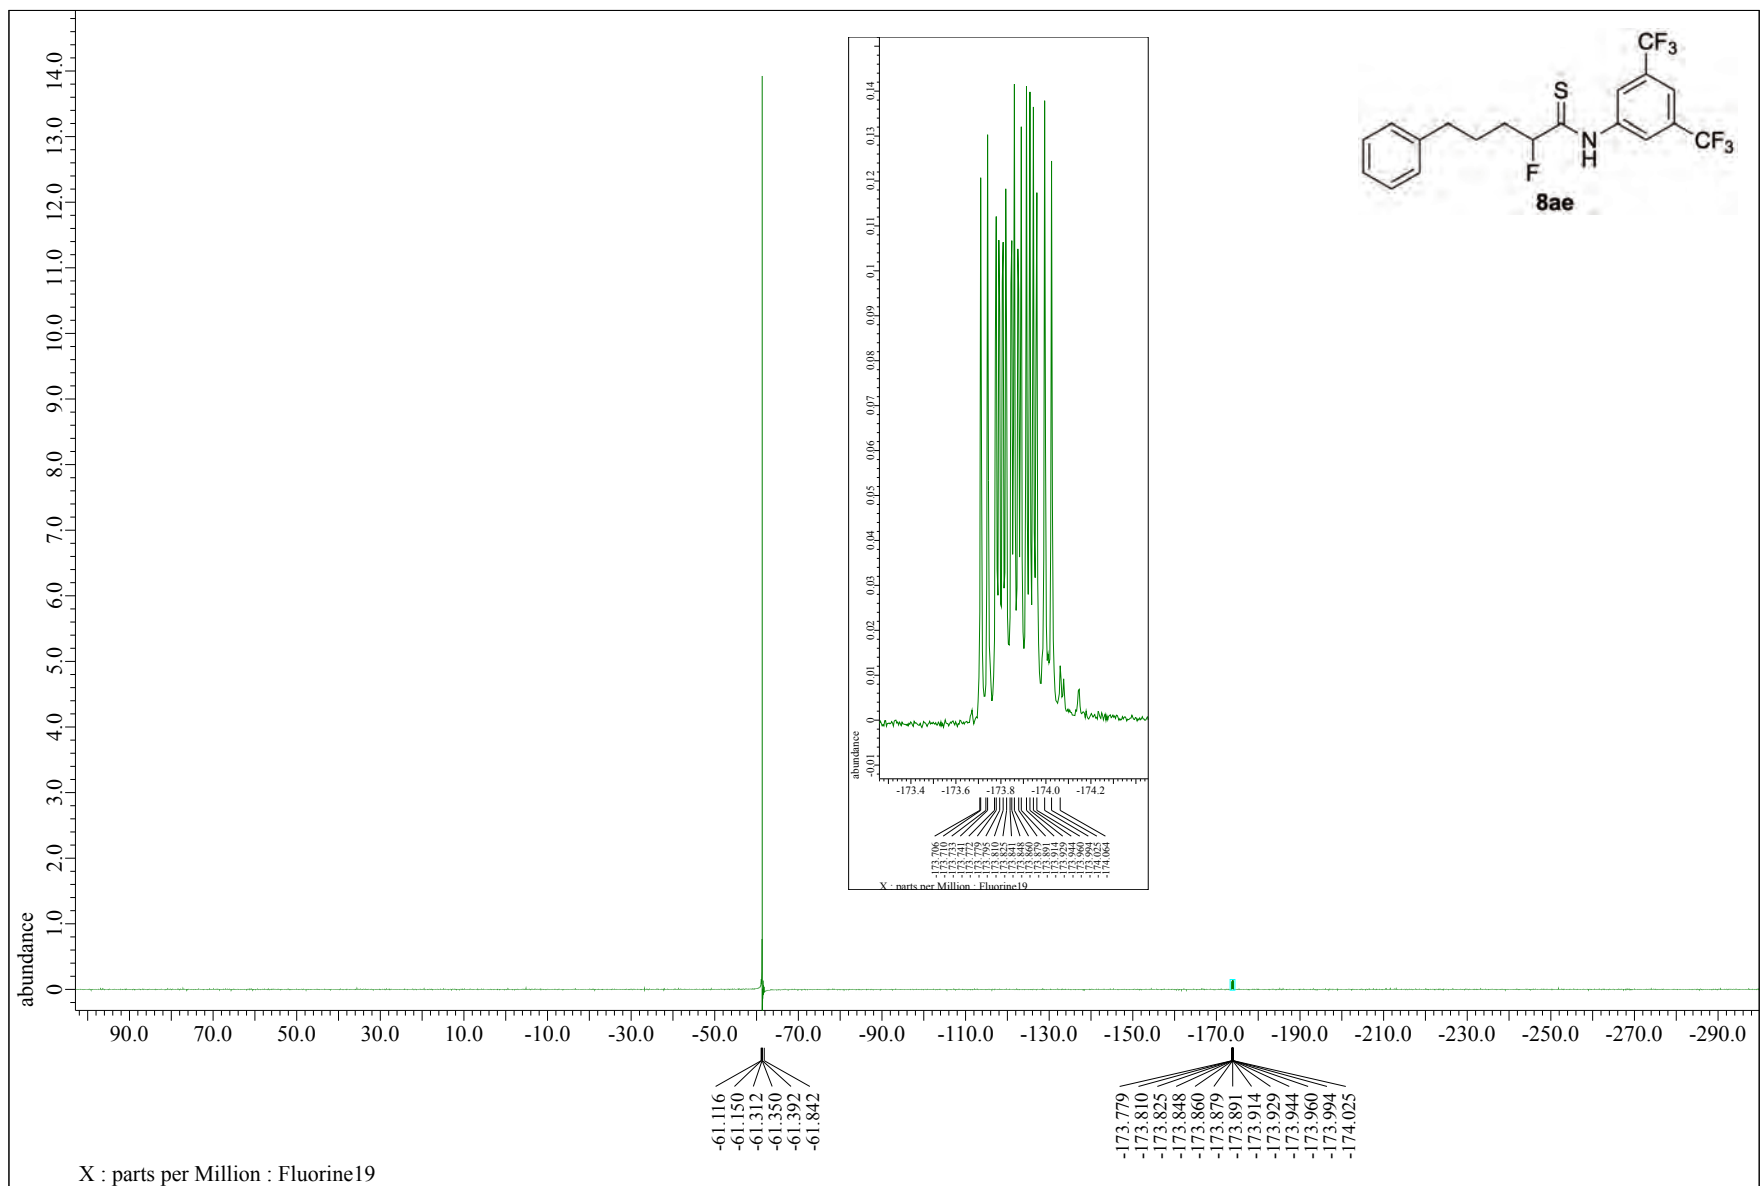

Sample No. : C:\Xcalibur\...10517\BG\_230239\_E

Instrument : Exactive Plus

Mobile phase solvent : MeOH

Operator name : hayashi harumi

Sample solvent : CHCl3

Date : 05/17/23 13:40:35

Instrumental method : C:\Xcalibur\methods\ESI\_100ul\S60\_100ul\_mz150\_2000pn.meth

Instrumental Analysis Division, Global Facility Center, Creative Research Institution, Hokkaido University

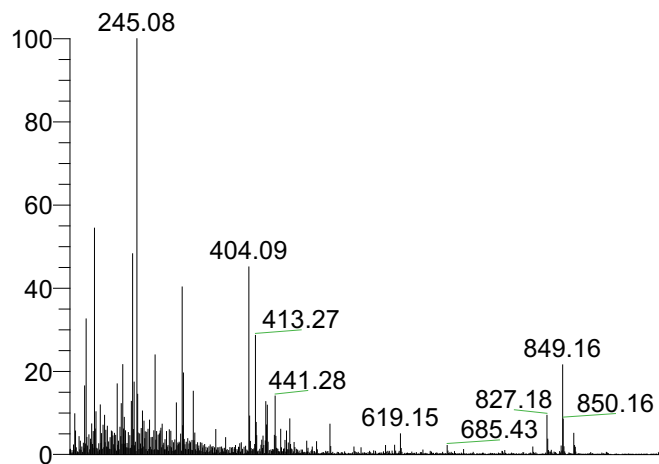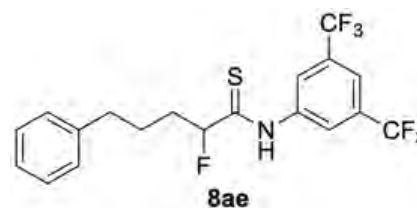

NL: 5.90E6  
BG\_230239\_EK0046\_p  
n#18-32 RT: 0.31-0.49  
AV: 7 T: FTMS + c ESI  
Full ms  
[150.00-2000.00]

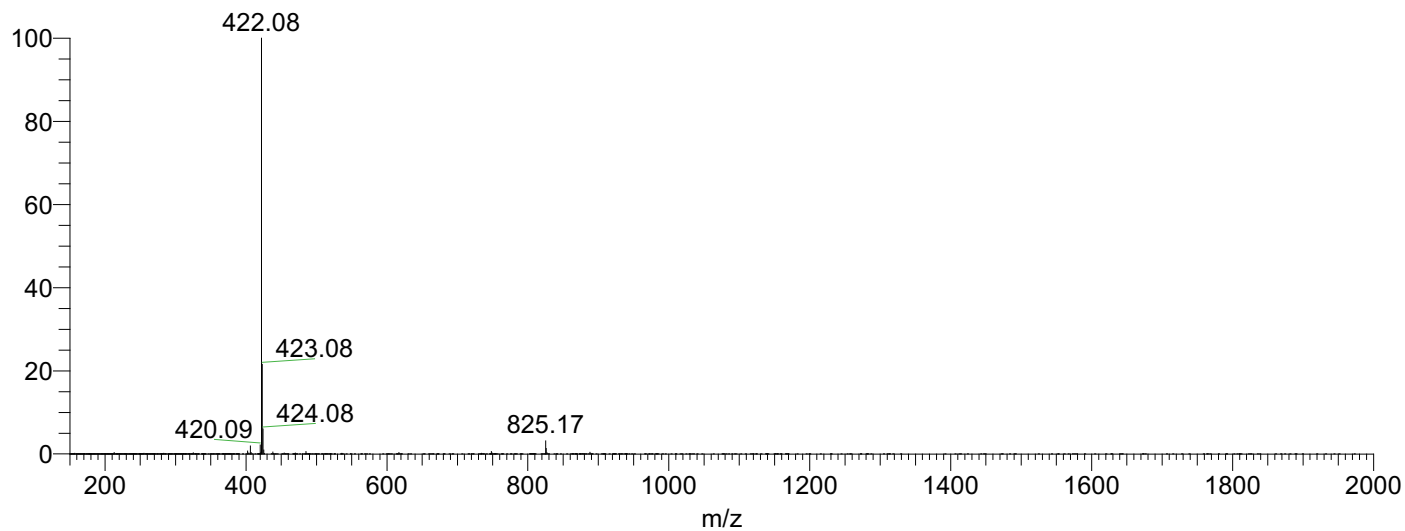

NL: 6.60E8  
BG\_230239\_EK0046\_p  
n#18-32 RT: 0.30-0.50  
AV: 8 T: FTMS - c ESI  
Full ms  
[150.00-2000.00]

Sample No. : C:\Xcalibur\...10517\200209\_EK0046\_pn

Instrument : Exactive Plus

Mobile phase solvent : MeOH

Operator name : hayashi harumi

Sample solvent : CHCl3

Date : 05/17/23 11:47:31

Instrumental method : C:\Xcalibur\methods\ESI\_100ul\S60\_100ul\_mz150\_2000pn.meth

Instrumental Analysis Division, Global Facility Center, Creative Research Institution, Hokkaido University

230239\_EK0046\_pn #18-21 RT: 0.30-0.33 AV: 2 NL: 5.71E7

T: FTMS - p ESI Full ms [150.0000-2000.0000]

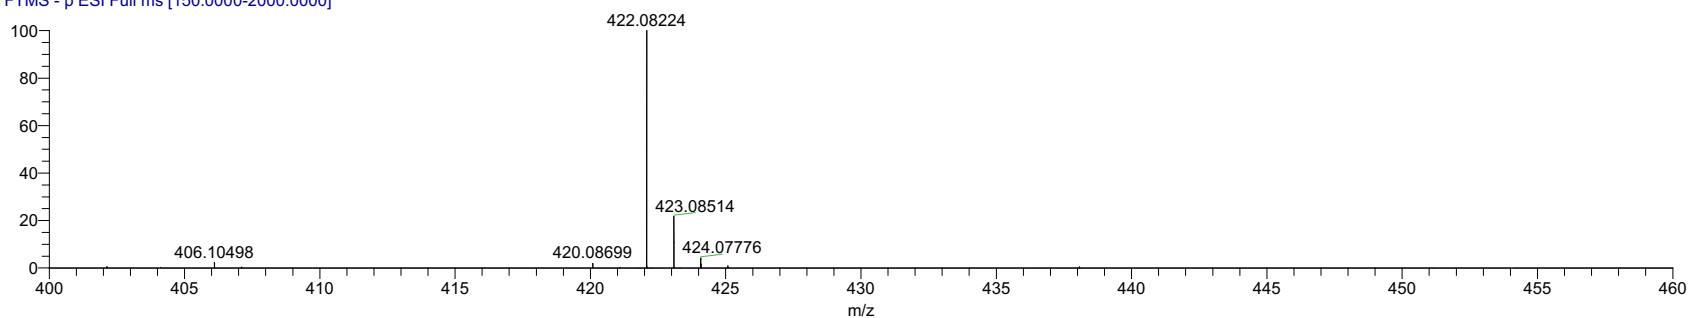

230239\_EK0046\_pn #22-25 RT: 0.36-0.38 AV: 2 NL: 2.08E8

T: FTMS - p ESI Full ms [150.0000-2000.0000]

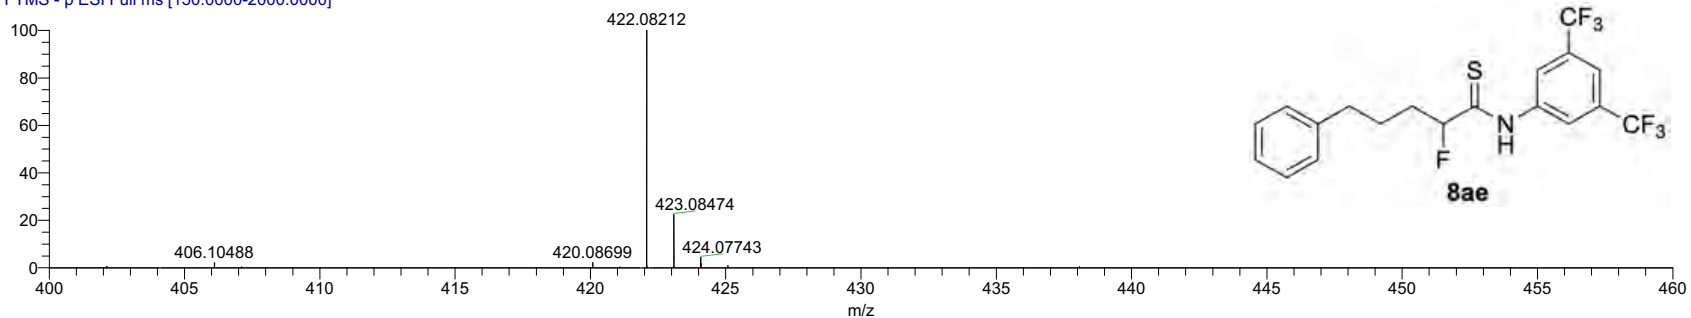

230239\_EK0046\_pn #26-29 RT: 0.41-0.44 AV: 2 NL: 1.77E8

T: FTMS - p ESI Full ms [150.0000-2000.0000]

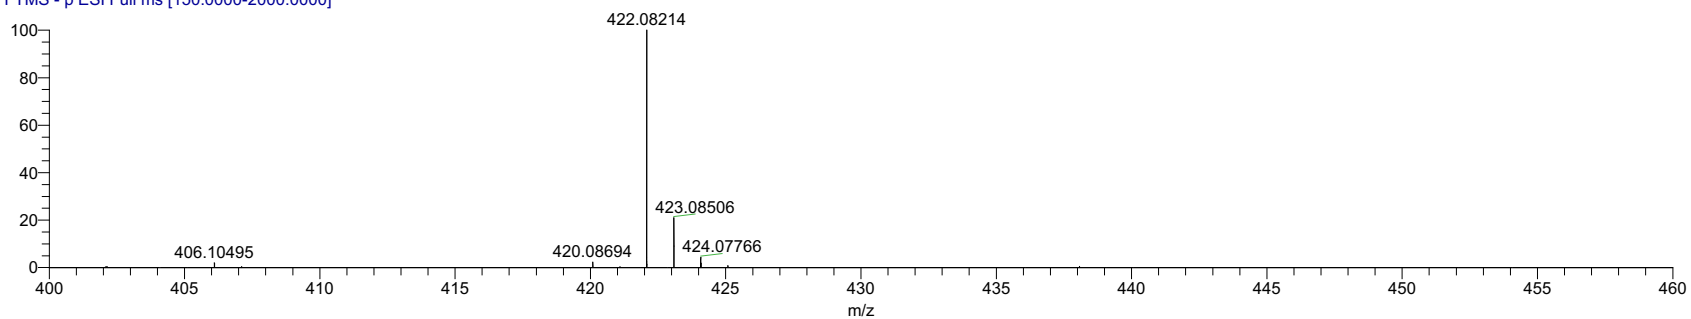

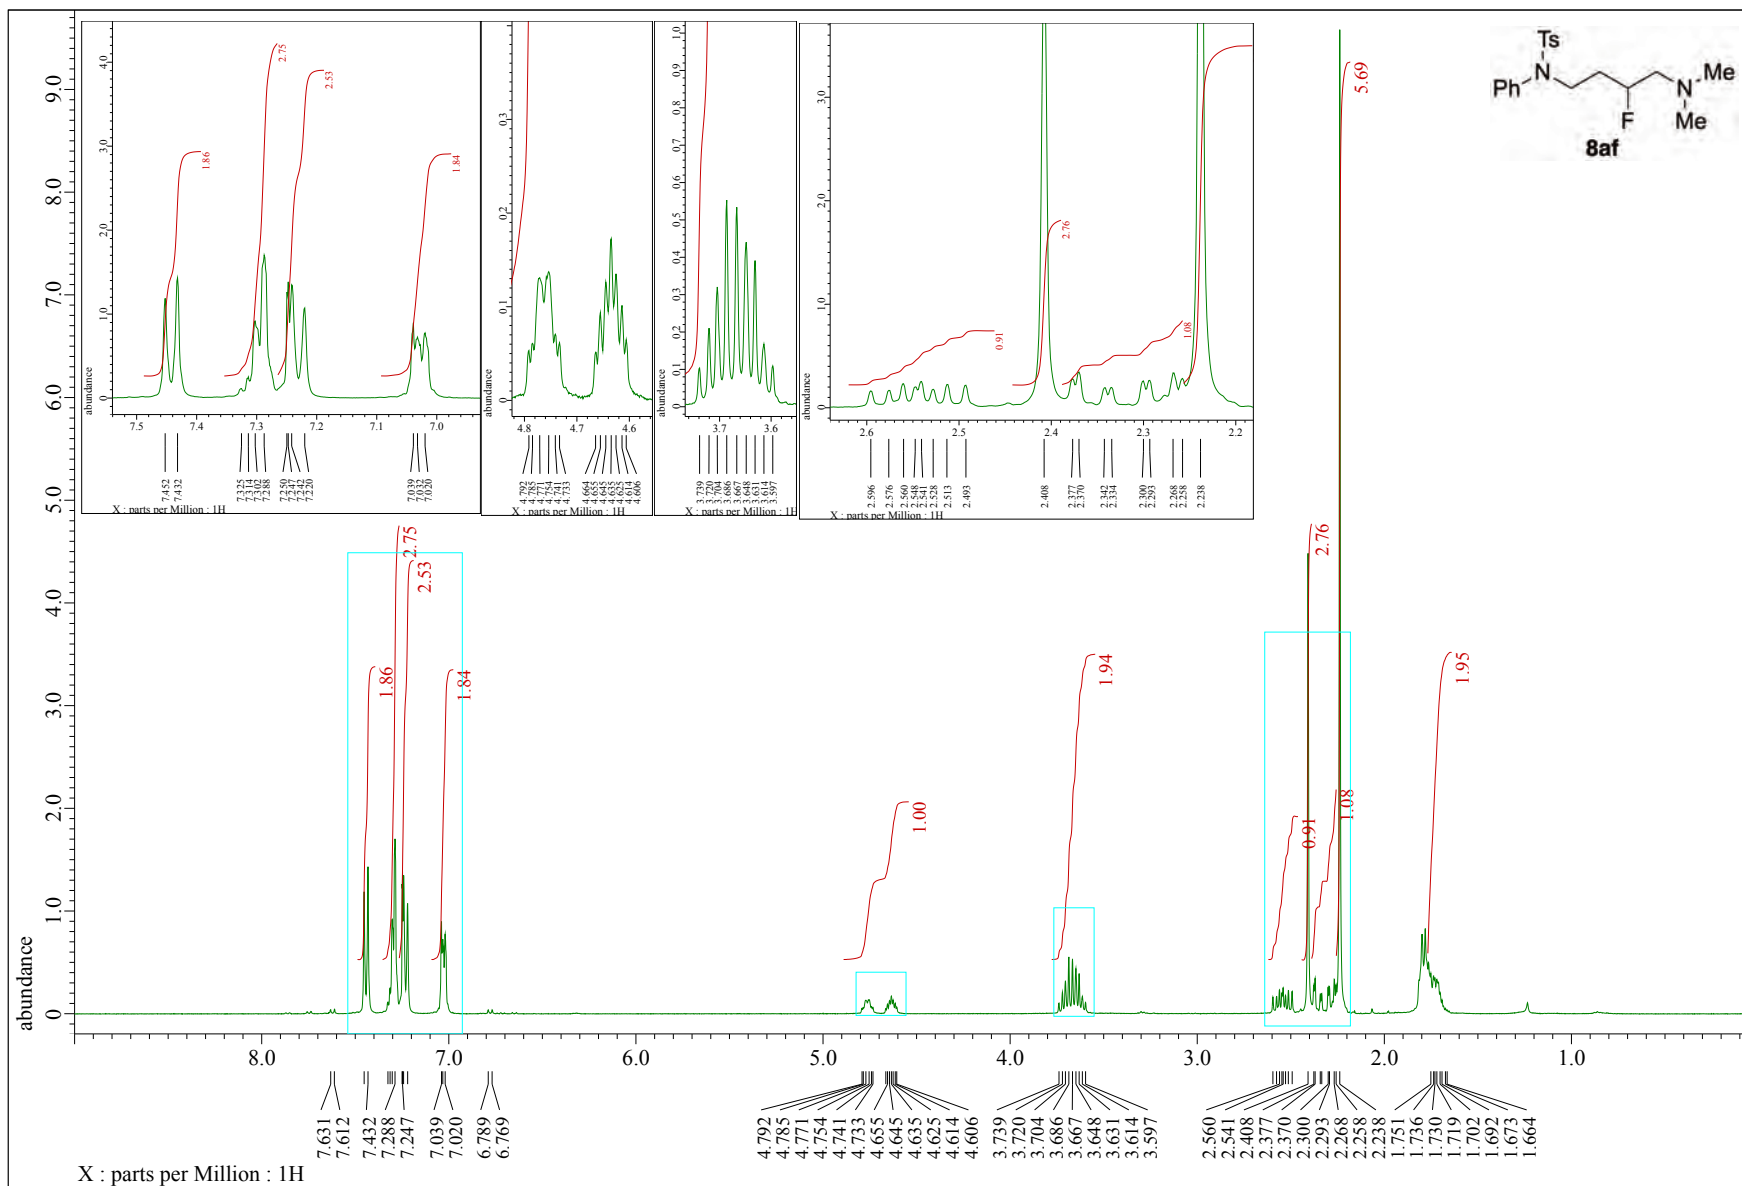



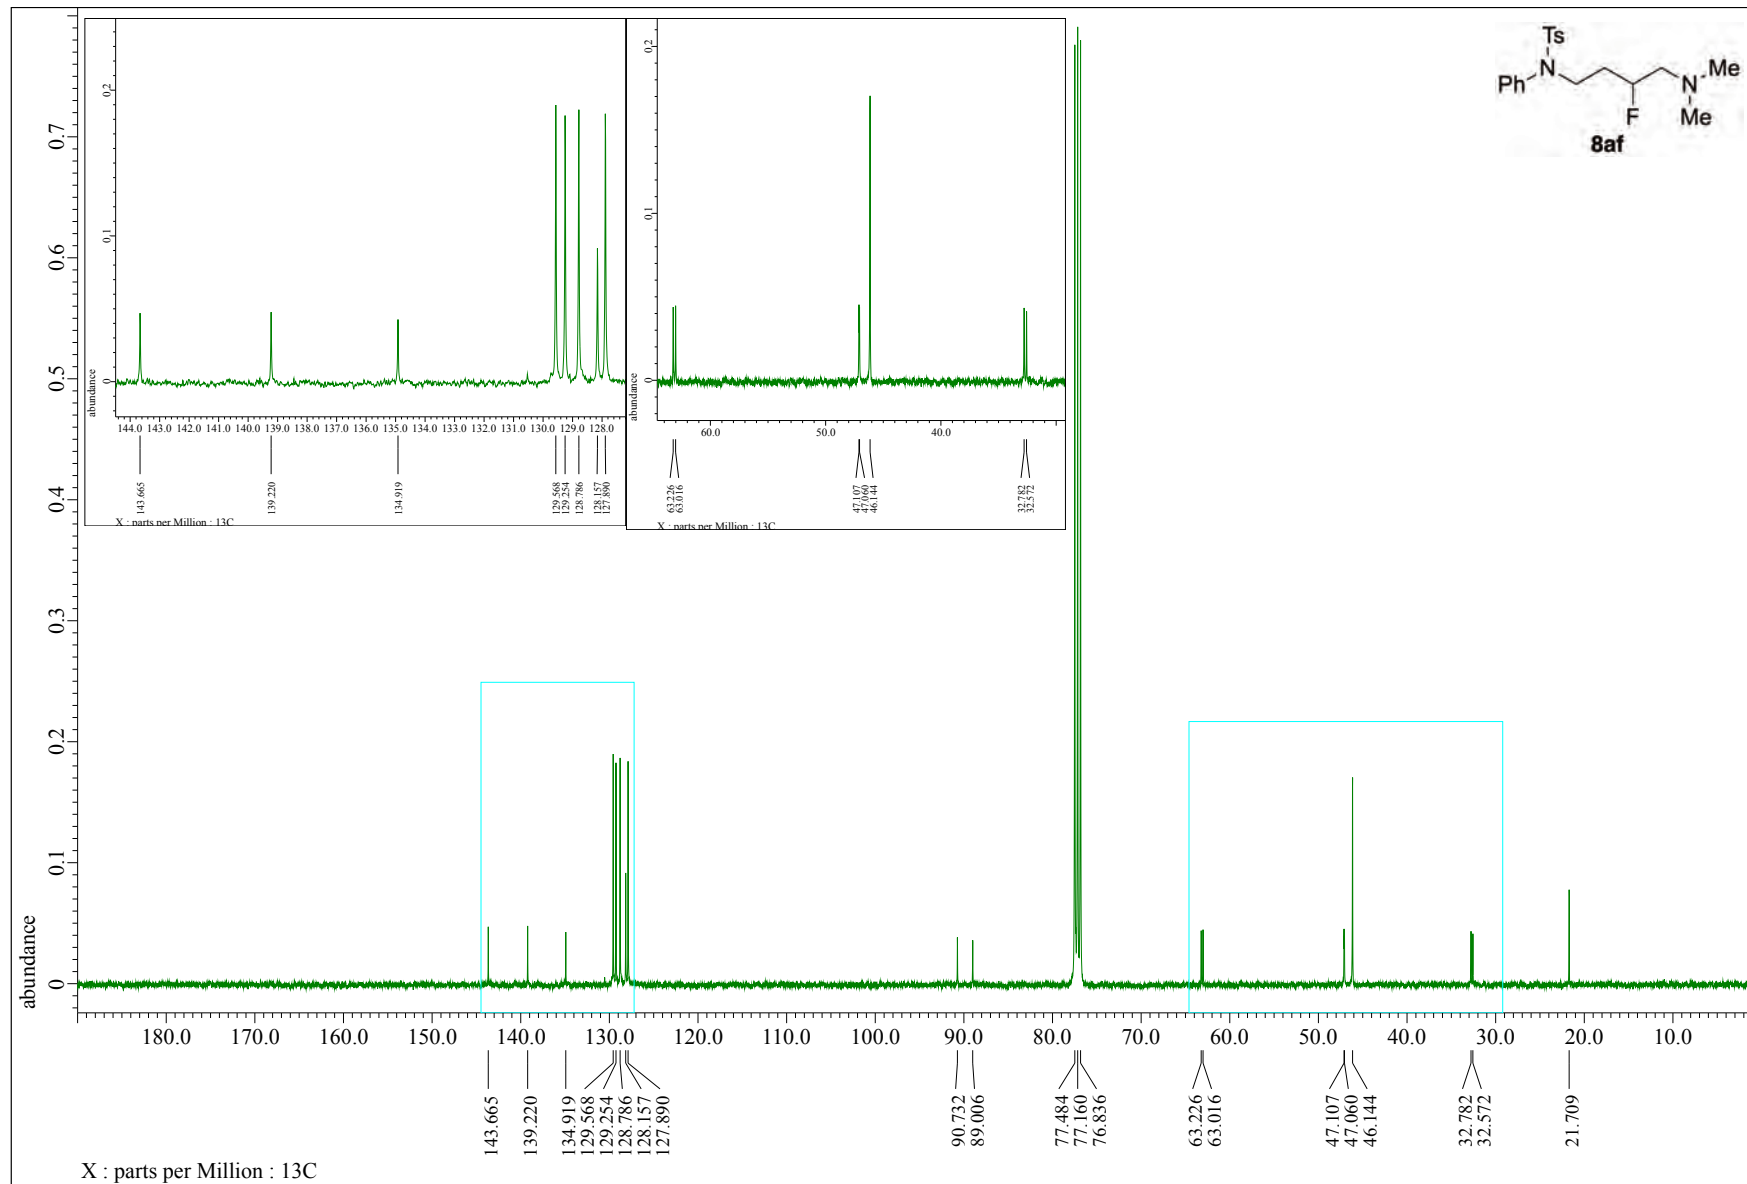

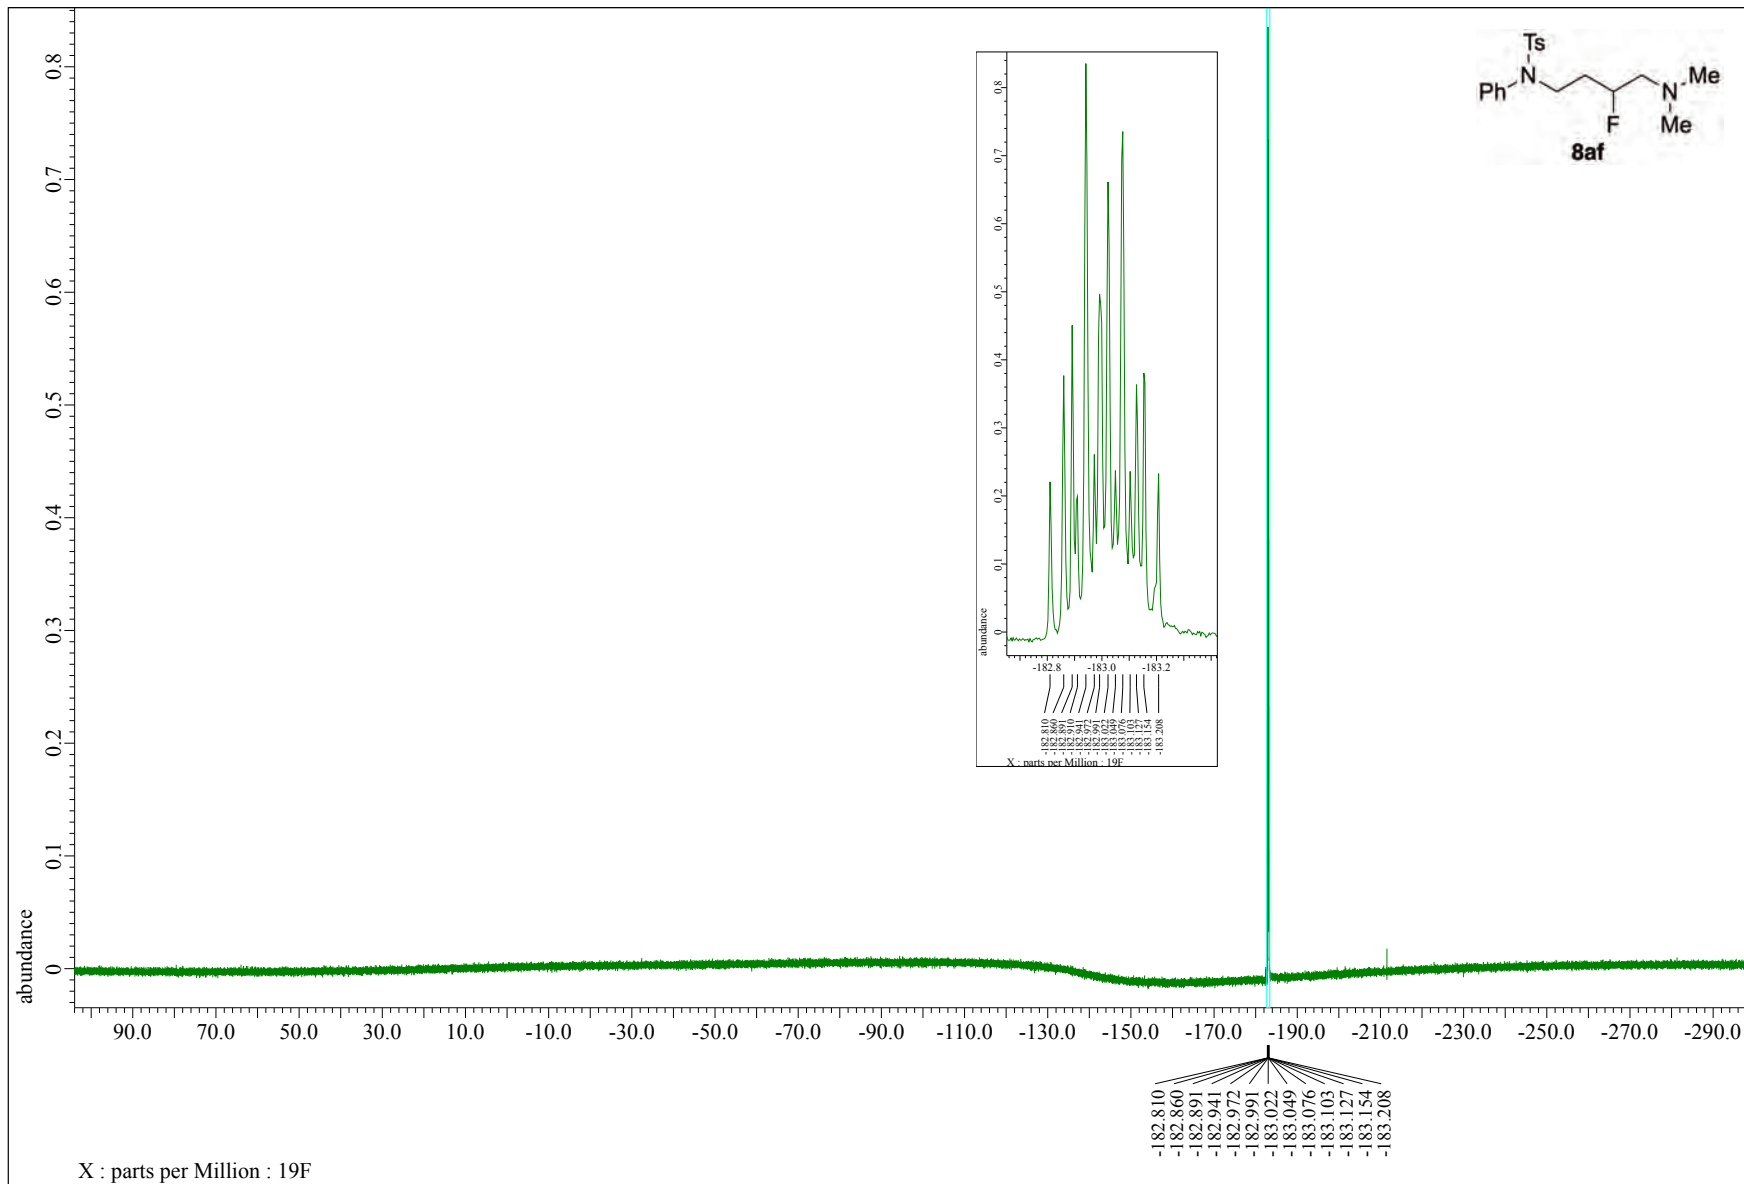

Sample No. : C:\Xcalibur\...\1228\BG\_231859\_8; \_

Instrument : Exactive Plus

Mobile phase solvent : MeOH

Operator name : hayashi harumi

Sample solvent : CHCl3

Date : 12/28/23 14:28:11

Instrumental method : C:\Xcalibur\methods\ESI\_100ul\S60\_100ul\_mz150\_2000pn.meth

Instrumental Analysis Division, Global Facility Center, Creative Research Institution, Hokkaido University

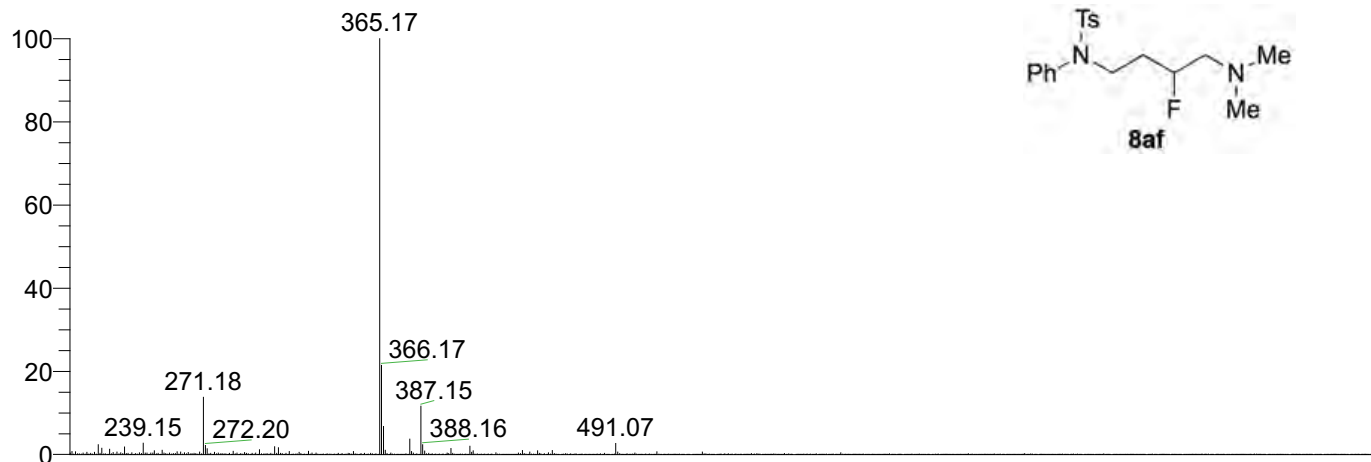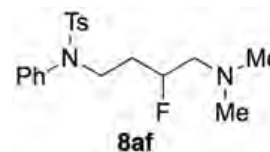

NL: 6.22E7  
BG\_231859\_8af\_pn#1  
8-31 RT: 0.31-0.50  
AV: 7 T: FTMS + c  
ESI Full ms  
[150.00-2000.00]

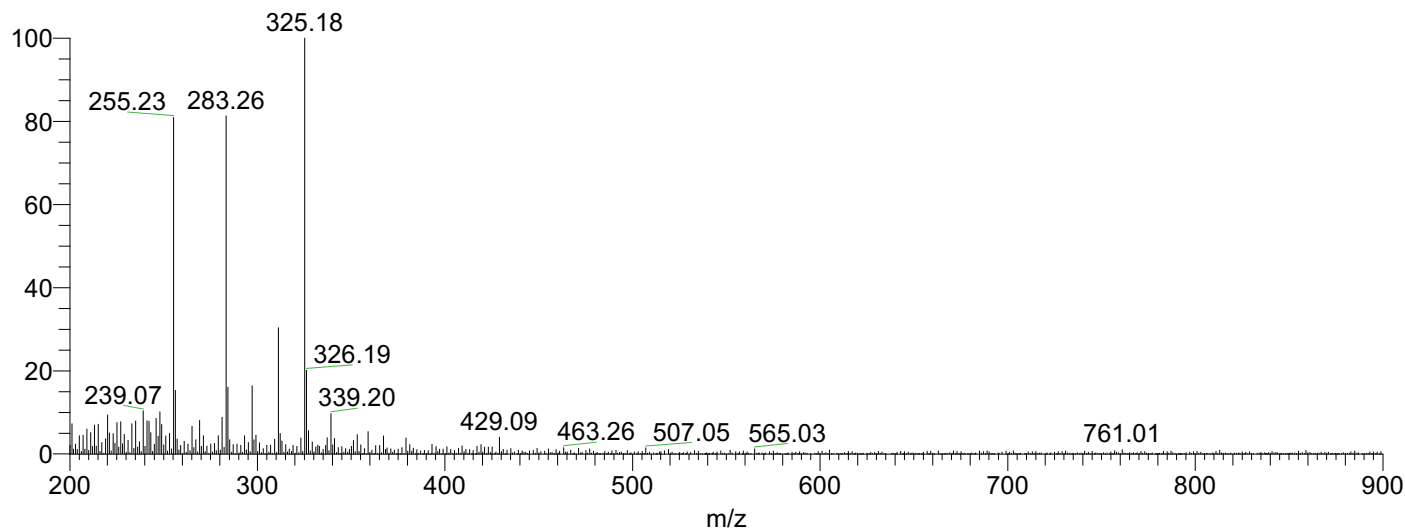

NL: 1.54E6  
BG\_231859\_8af\_pn#1  
8-31 RT: 0.30-0.49  
AV: 7 T: FTMS - c ESI  
Full ms  
[150.00-2000.00]

Sample No. : C:\Xcalibur\...1228\201009\_8af\_pn

Instrument : Exactive Plus

Mobile phase solvent : MeOH

Operator name : hayashi harumi

Sample solvent : CHCl3

Date : 12/28/23 12:27:52

Instrumental method : C:\Xcalibur\methods\ESI\_100ul\S60\_100ul\_mz150\_2000pn.meth

Instrumental Analysis Division, Global Facility Center, Creative Research Institution, Hokkaido University

231859\_8af\_pn #21-25 RT: 0.34-0.41 AV: 3 NL: 1.98E7

T: FTMS + p ESI Full ms [150.0000-2000.0000]

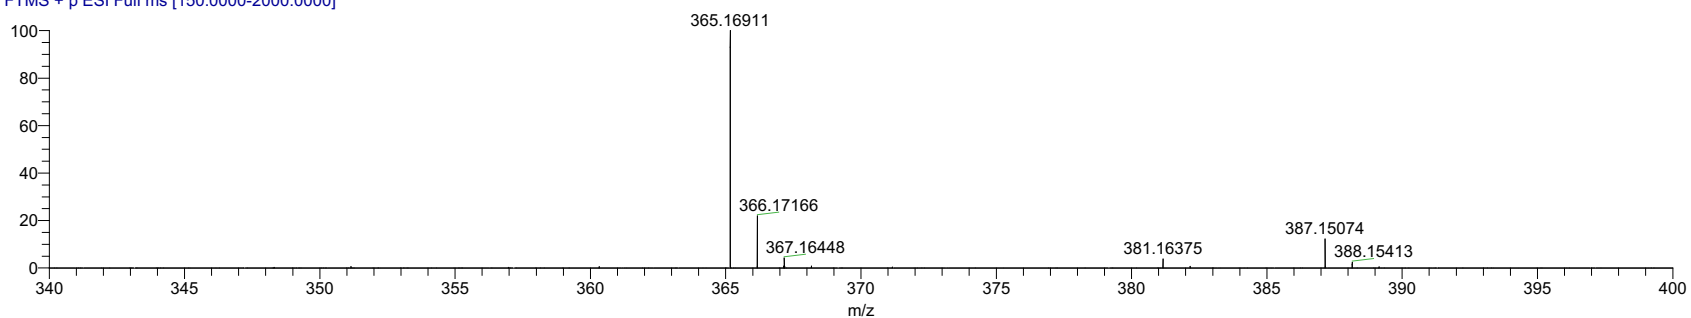

231859\_8af\_pn #25-28 RT: 0.41-0.44 AV: 2 NL: 1.80E7

T: FTMS + p ESI Full ms [150.0000-2000.0000]

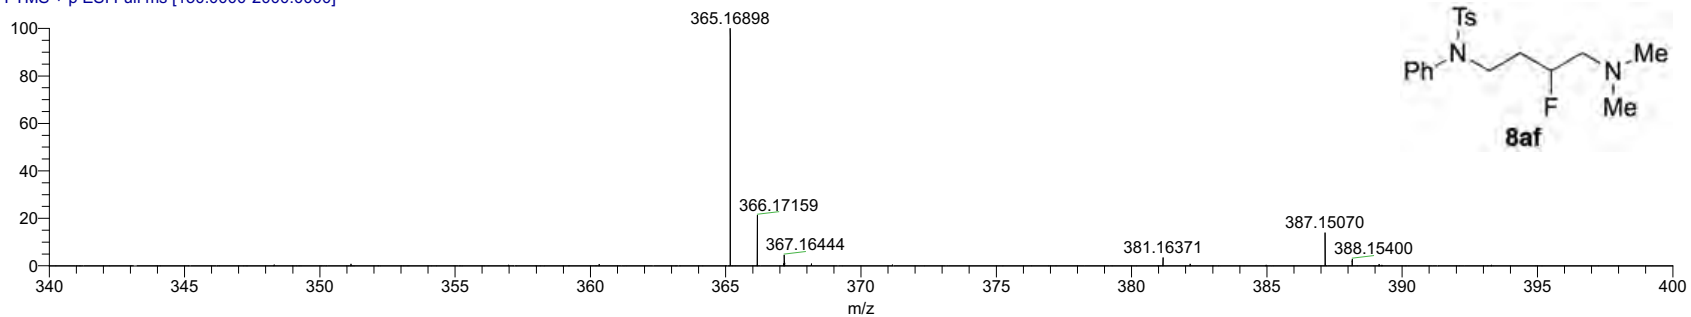

231859\_8af\_pn #29-31 RT: 0.47-0.50 AV: 2 NL: 1.03E7

T: FTMS + p ESI Full ms [150.0000-2000.0000]

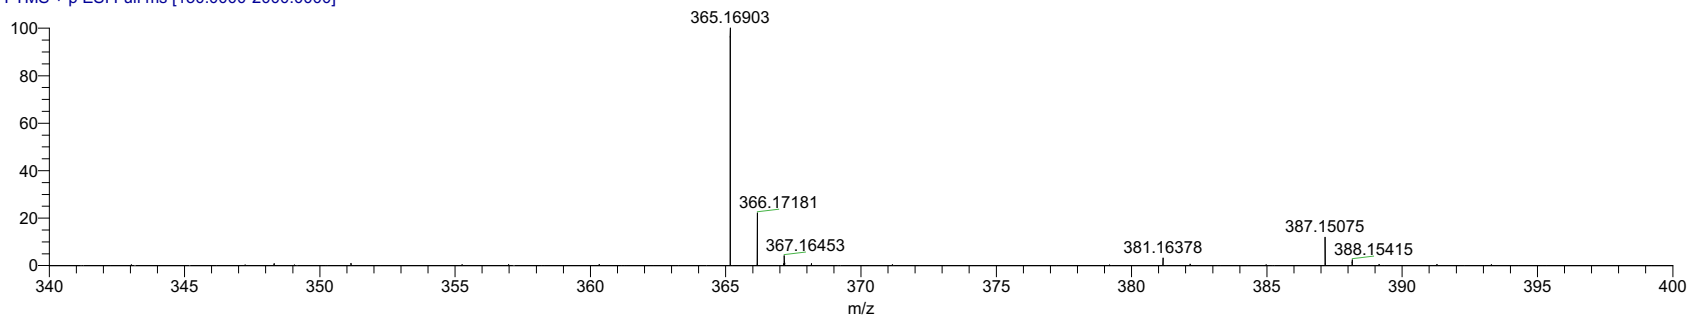

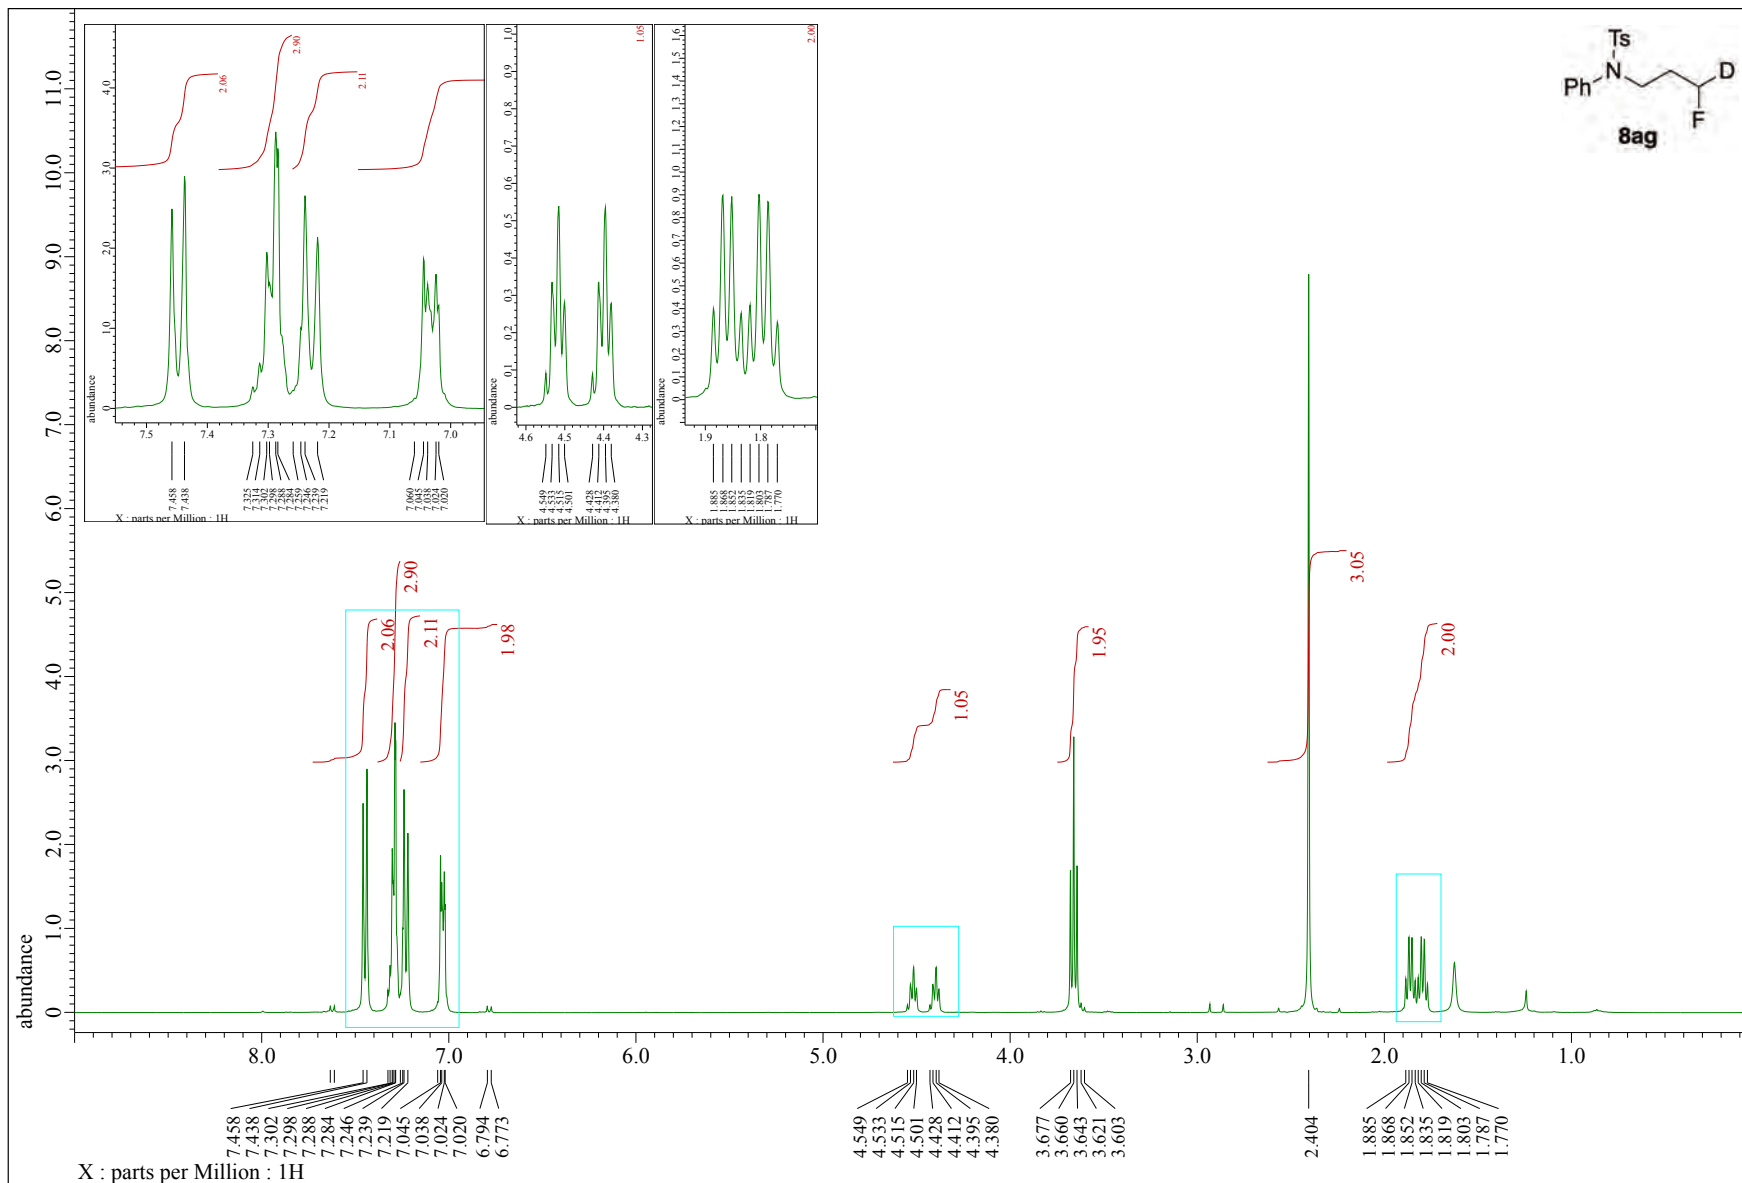

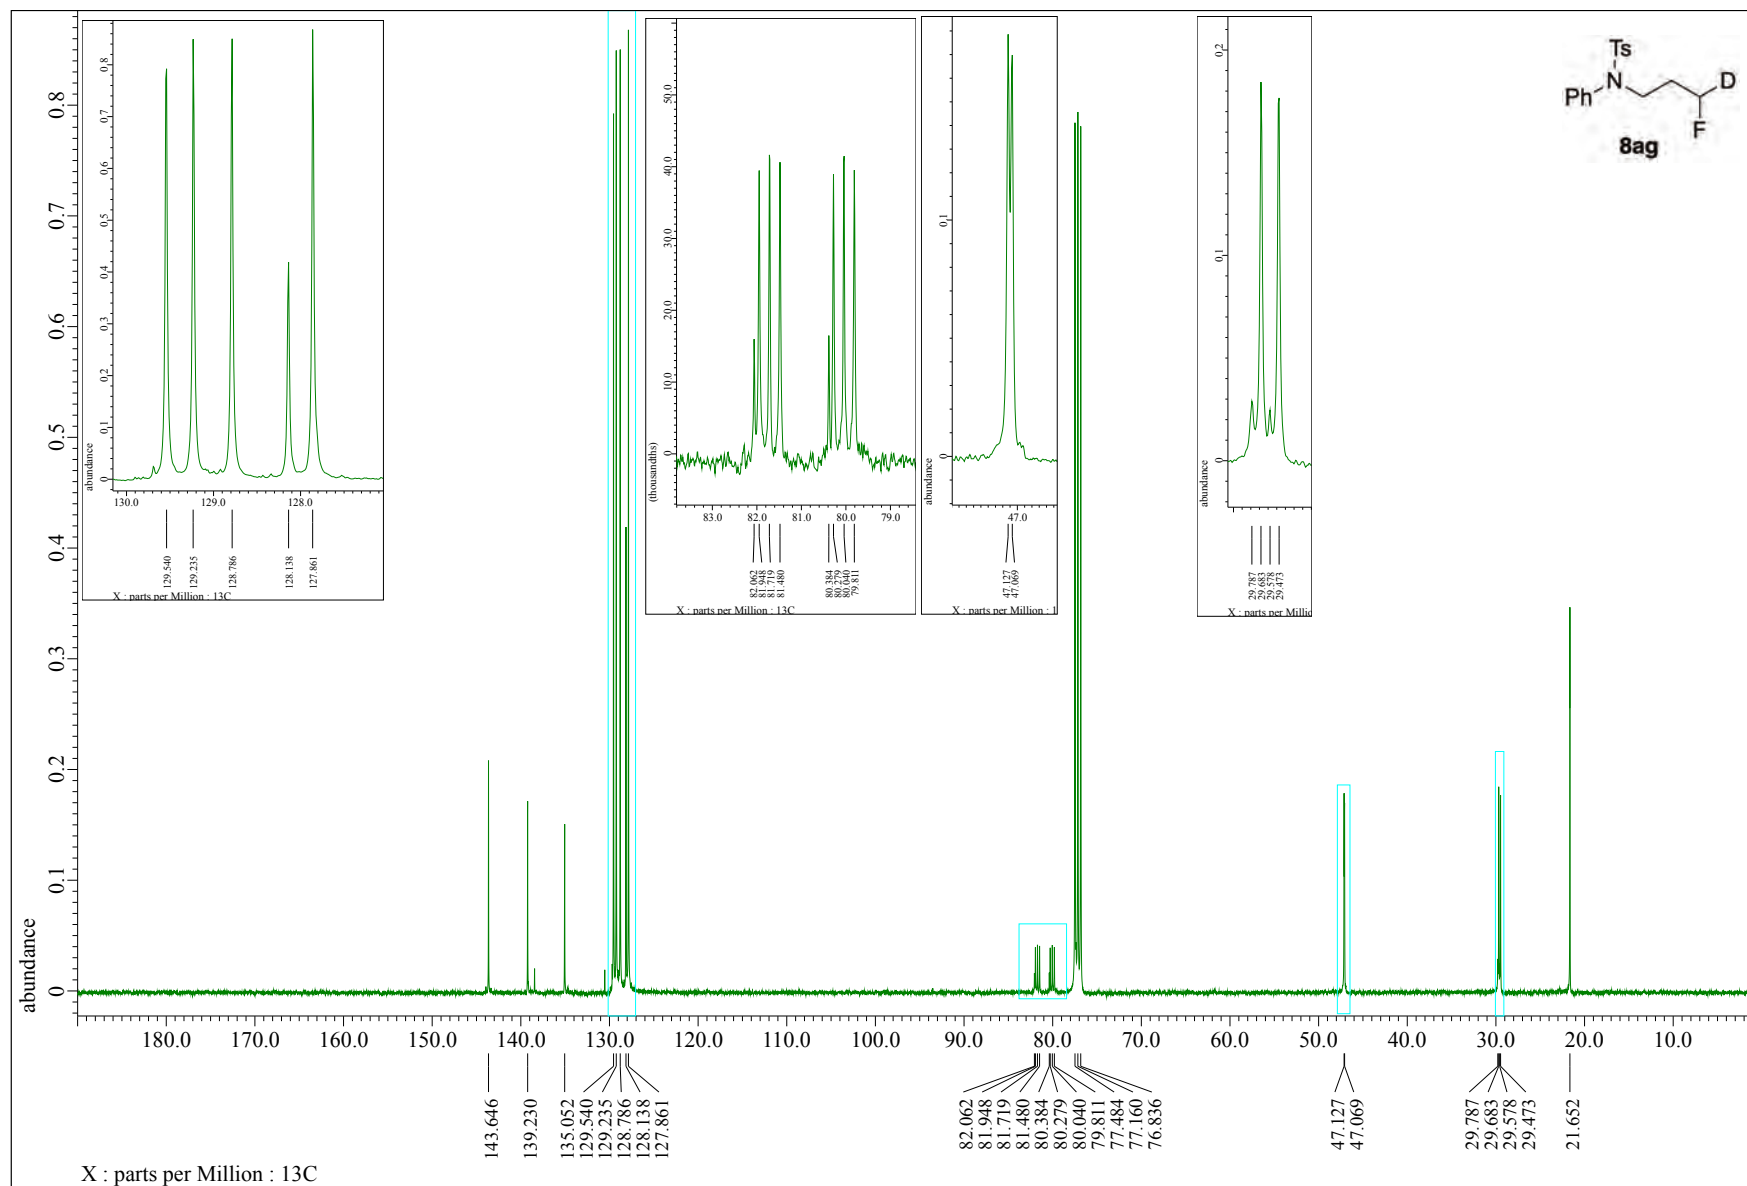

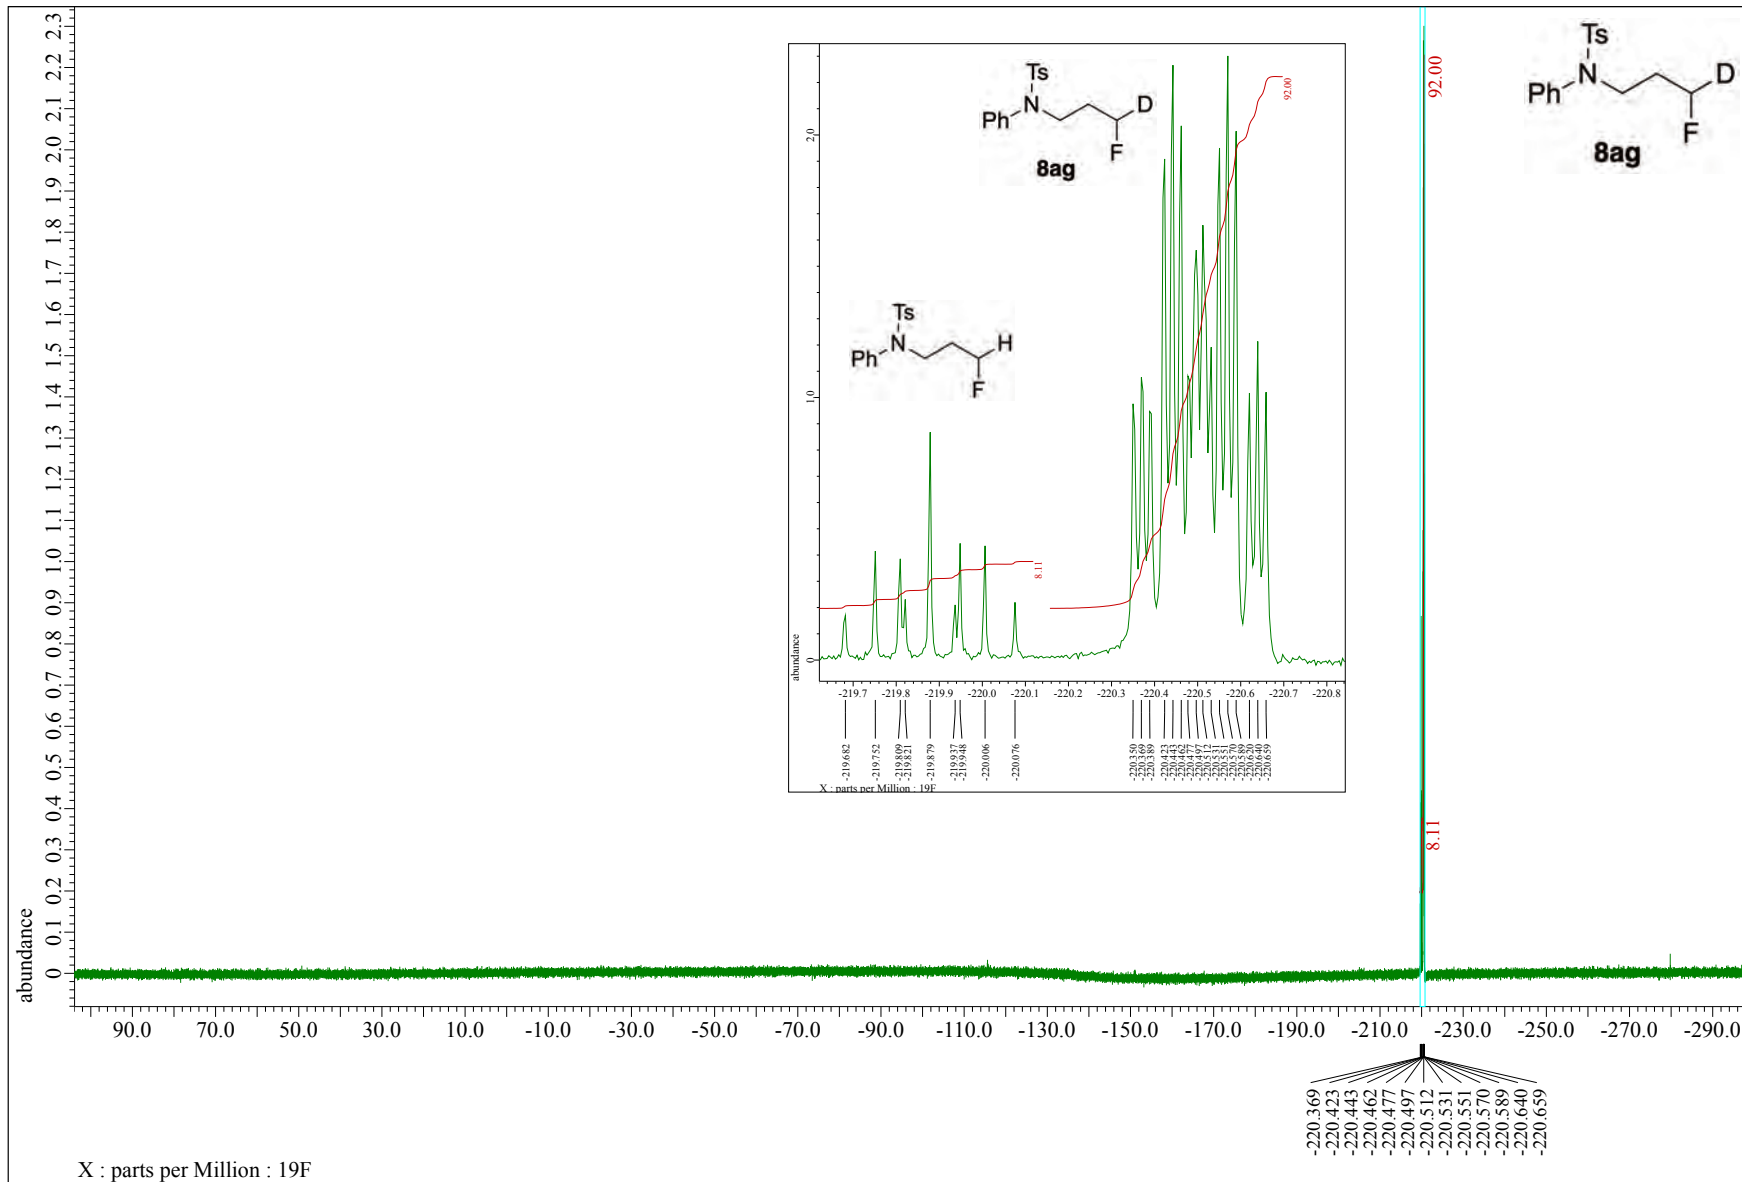

Sample No. : C:\Xcalibur\...0109\BG\_231860\_8: 1

Instrument : Exactive Plus

Mobile phase solvent : MeOH

Operator name : hayashi harumi

Sample solvent : CHCl3

Date : 01/09/24 11:30:44

Instrumental method : C:\Xcalibur\methods\ESI\_100ul\S60\_100ul\_mz150\_2000pn.meth

Instrumental Analysis Division, Global Facility Center, Creative Research Institution, Hokkaido University

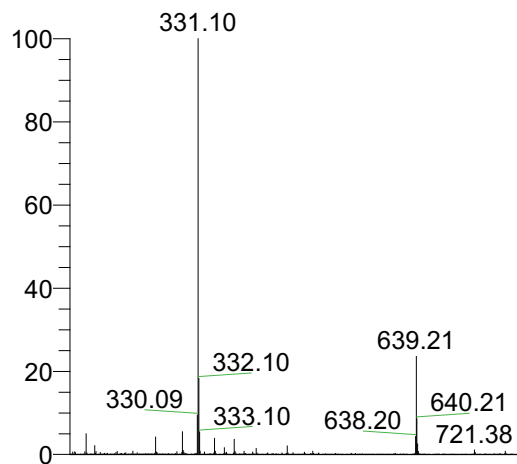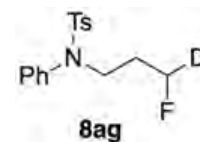

NL: 1.83E8  
BG\_231860\_8ag\_pn2#  
18-31 RT: 0.31-0.50  
AV: 7 T: FTMS + c ESI  
Full ms  
[150.00-2000.00]

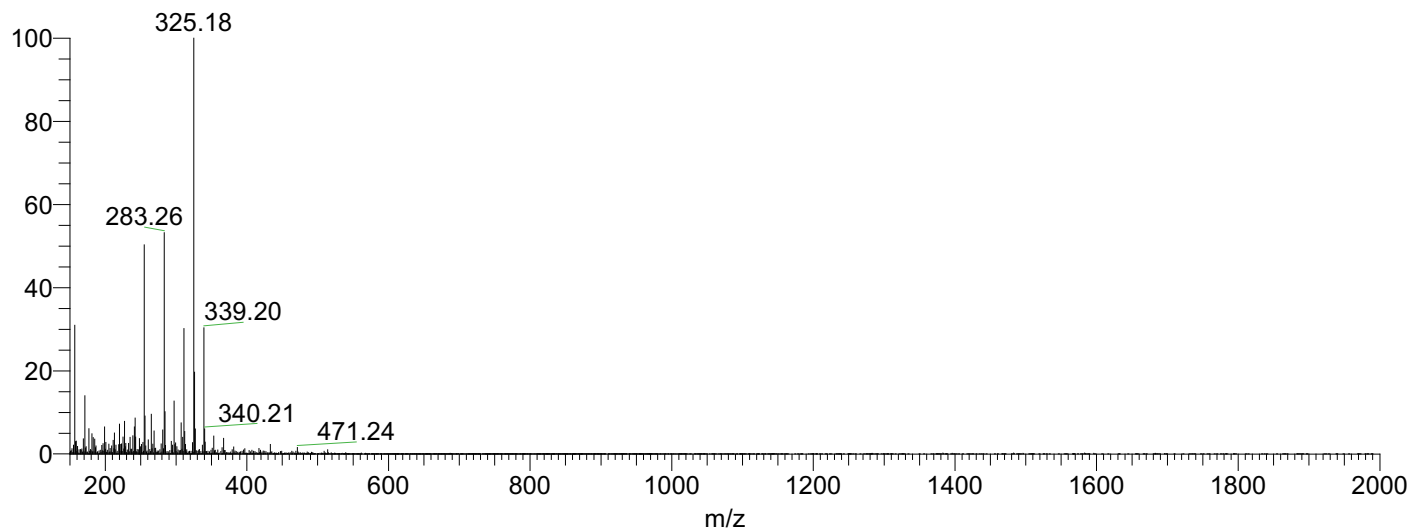

NL: 5.88E6  
BG\_231860\_8ag\_pn2#  
18-31 RT: 0.30-0.48  
AV: 7 T: FTMS - c ESI  
Full ms  
[150.00-2000.00]



Sample No. : C:\Xcalibur\...0109\2000\_8ag\_pn2

Instrument : Exactive Plus

Mobile phase solvent : MeOH

Operator name : hayashi harumi

Sample solvent : CHCl3

Date : 01/09/24 11:22:19

Instrumental method : C:\Xcalibur\methods\ESI\_100ul\S60\_100ul\_mz150\_2000pn.meth

Instrumental Analysis Division, Global Facility Center, Creative Research Institution, Hokkaido University

231860\_8ag\_pn2 #21-25 RT: 0.34-0.40 AV: 3 NL: 6.32E7

T: FTMS + p ESI Full ms [150.0000-2000.0000]

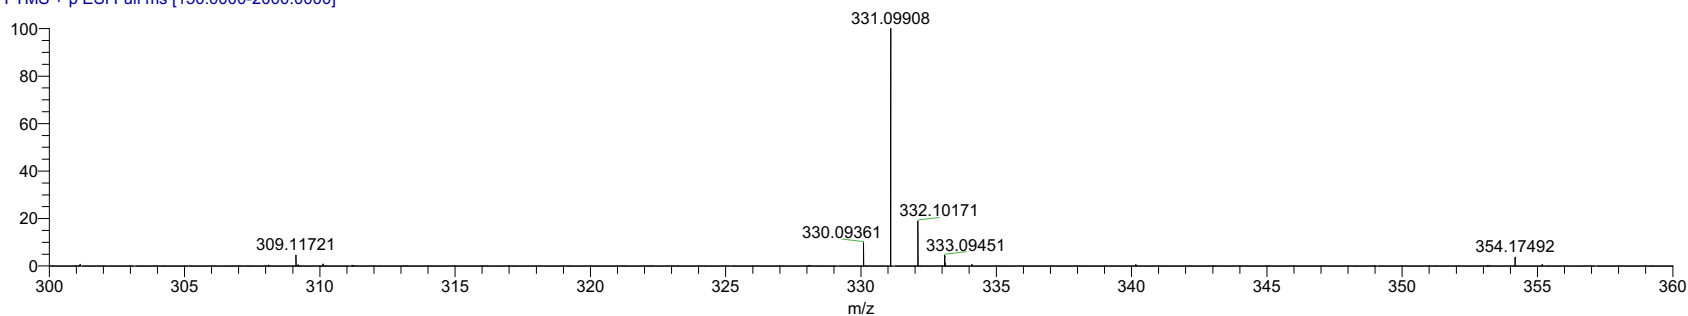

231860\_8ag\_pn2 #25-28 RT: 0.40-0.43 AV: 2 NL: 5.97E7

T: FTMS + p ESI Full ms [150.0000-2000.0000]

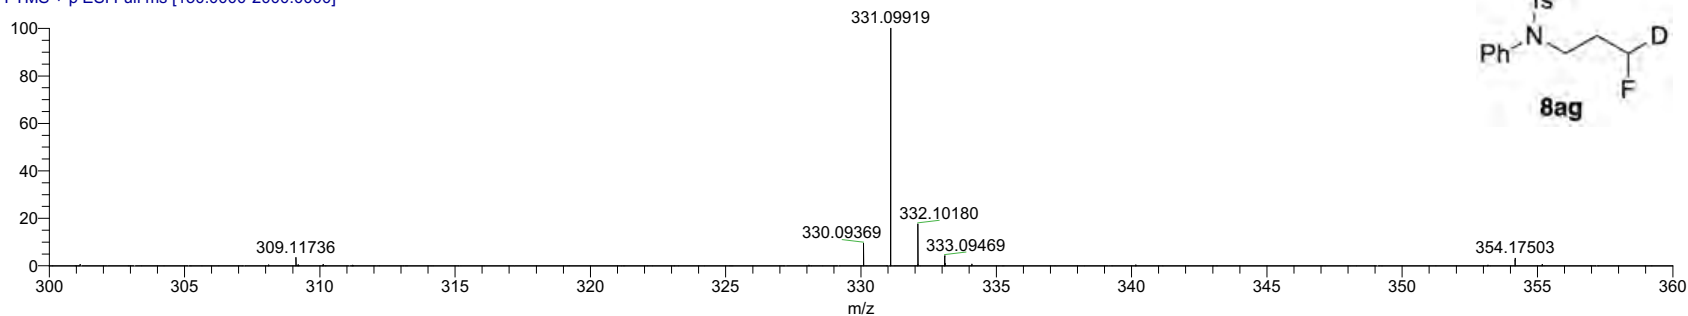

231860\_8ag\_pn2 #29-32 RT: 0.47-0.50 AV: 2 NL: 2.62E7

T: FTMS + p ESI Full ms [150.0000-2000.0000]

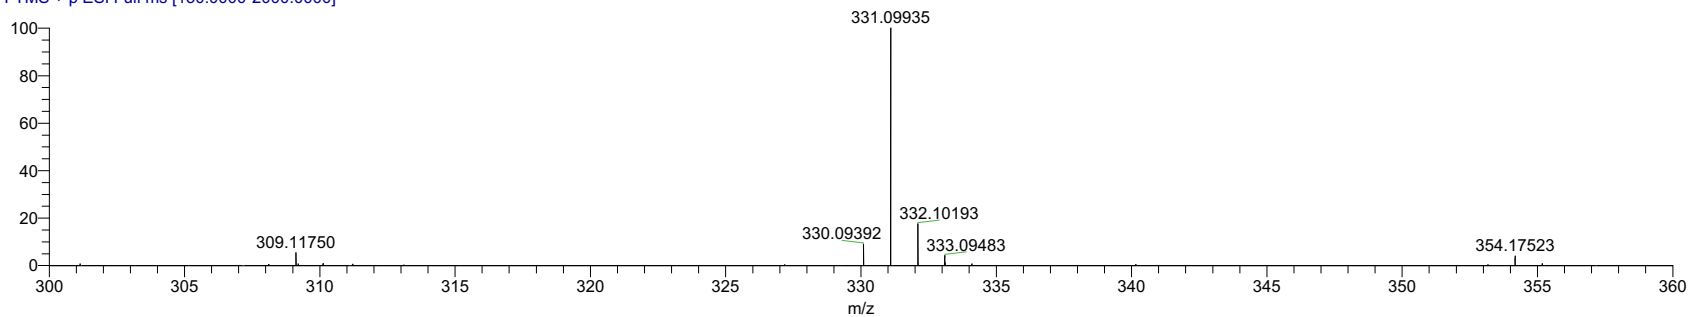

*10. Cartesian Coordinates of the Optimized Structures Obtained from DFT Calculations*

**2a-I•2DMF\_conformer-1**

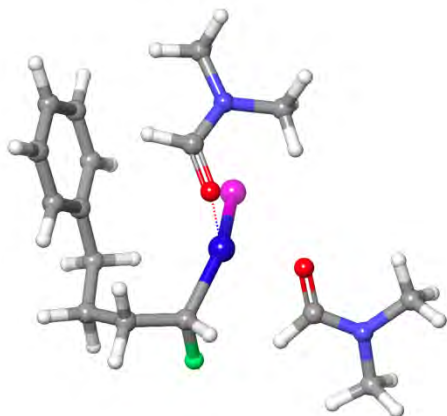

|    |             |             |             |
|----|-------------|-------------|-------------|
| C  | 0.87677300  | 2.35197600  | -0.67396500 |
| H  | 1.44258400  | 2.43459600  | -1.61860500 |
| F  | 1.73788100  | 2.94441700  | 0.30298300  |
| Zn | 0.64857300  | 0.37211200  | -0.37237300 |
| O  | -0.53400600 | -0.38765700 | -1.82548100 |
| C  | -1.52424300 | -1.11512900 | -1.61209900 |
| N  | -1.46357700 | -2.43007200 | -1.45028800 |
| H  | -2.53461400 | -0.68831700 | -1.56745800 |
| O  | 2.52359300  | -0.34240500 | -0.96789500 |
| C  | 3.42887300  | 0.37512700  | -0.51219700 |
| N  | 4.72018500  | 0.04264400  | -0.52618400 |
| H  | 3.20857700  | 1.35705500  | -0.06786400 |
| C  | -2.64028800 | -3.19672700 | -1.08512000 |

|   |             |             |             |
|---|-------------|-------------|-------------|
| H | -2.53625200 | -3.56146900 | -0.05766300 |
| H | -3.52468400 | -2.56080700 | -1.14942700 |
| H | -2.75256100 | -4.04920400 | -1.76176300 |
| C | -0.19881900 | -3.14839700 | -1.49450300 |
| H | 0.59518700  | -2.45494400 | -1.76914700 |
| H | 0.01895200  | -3.56899900 | -0.50908400 |
| H | -0.27075600 | -3.94938700 | -2.23746900 |
| C | 5.16080000  | -1.23324300 | -1.06076900 |
| H | 5.66256400  | -1.80987300 | -0.27739700 |
| H | 4.28931700  | -1.77966300 | -1.41697300 |
| H | 5.86064500  | -1.06970700 | -1.88644300 |
| C | 5.73152000  | 0.92104000  | 0.02971200  |
| H | 5.26142500  | 1.83335800  | 0.40084300  |
| H | 6.24814400  | 0.42510600  | 0.85764400  |
| H | 6.46615500  | 1.18500800  | -0.73783300 |
| C | -0.33295100 | 3.25425200  | -0.82660900 |
| H | -0.02584800 | 4.23686200  | -1.21525300 |
| H | -0.97363700 | 2.79767500  | -1.59260100 |
| C | -1.11258800 | 3.50835100  | 0.46819000  |
| H | -1.93421300 | 4.20694200  | 0.26257000  |
| H | -0.43883000 | 4.02610800  | 1.15900200  |
| C | -1.65469500 | 2.28153000  | 1.20081700  |
| H | -0.82875000 | 1.61161300  | 1.46739700  |
| H | -2.06498900 | 2.61486100  | 2.16343900  |
| C | -2.73912100 | 1.47181600  | 0.51631500  |

|   |             |             |             |
|---|-------------|-------------|-------------|
| C | -3.15282400 | 0.27124200  | 1.11395600  |
| C | -3.40891300 | 1.89477800  | -0.63502500 |
| C | -4.21484900 | -0.46332500 | 0.59743200  |
| H | -2.63559700 | -0.07709100 | 2.00371700  |
| C | -4.46565200 | 1.15231100  | -1.16703200 |
| H | -3.12049600 | 2.82367800  | -1.11672800 |
| C | -4.87989800 | -0.02469900 | -0.54931300 |
| H | -4.52744900 | -1.37737900 | 1.09505600  |
| H | -4.97398800 | 1.50703000  | -2.05874600 |
| H | -5.71560000 | -0.59026900 | -0.95165400 |
| I | 0.31613000  | -1.29129800 | 1.72359200  |

**2a-I•2DMF\_conformer-2**

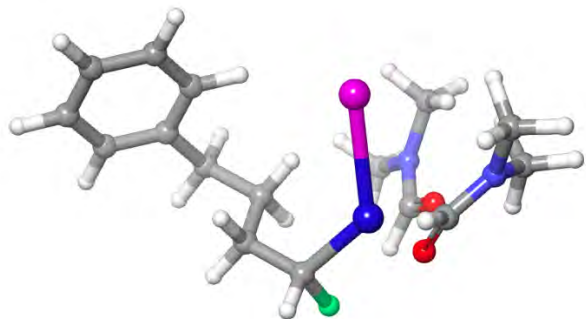

|    |             |             |             |
|----|-------------|-------------|-------------|
| C  | 0.42506000  | -1.18541000 | -2.22118700 |
| H  | 0.33238600  | -0.84916200 | -3.26098000 |
| F  | 0.22900100  | -2.60668000 | -2.28140700 |
| Zn | -1.01592000 | -0.40909600 | -1.04280000 |
| O  | -2.74200400 | 0.21283100  | -1.90444200 |

|   |             |             |             |
|---|-------------|-------------|-------------|
| C | -3.39688300 | 1.19531700  | -1.50822100 |
| N | -4.15998300 | 1.21486400  | -0.42521000 |
| H | -3.39156100 | 2.13422800  | -2.07684600 |
| O | -1.74107300 | -1.89050200 | 0.19213400  |
| C | -0.87104500 | -2.75171700 | 0.43049300  |
| N | -0.38296400 | -2.98703400 | 1.64404600  |
| H | -0.43760300 | -3.35285300 | -0.37721000 |
| C | -4.25316500 | 0.05093900  | 0.44345900  |
| H | -5.28934800 | -0.05512000 | 0.77609400  |
| H | -3.94142700 | -0.83529400 | -0.10701100 |
| H | -3.59328000 | 0.18543800  | 1.30749600  |
| C | -4.70010200 | 2.46126200  | 0.08797300  |
| H | -4.58760300 | 3.24833800  | -0.65974200 |
| H | -5.76027100 | 2.33708600  | 0.32455800  |
| H | -4.15144400 | 2.74951500  | 0.99099600  |
| C | 0.67032200  | -3.96241900 | 1.85430200  |
| H | 0.37645400  | -4.66745400 | 2.63762600  |
| H | 0.85348000  | -4.51165100 | 0.92904900  |
| H | 1.59395700  | -3.45667300 | 2.15638300  |
| C | -0.75994400 | -2.15970300 | 2.78034400  |
| H | -1.52034600 | -1.44905200 | 2.46031500  |
| H | -1.14083100 | -2.79236900 | 3.58773500  |
| H | 0.11538400  | -1.60559700 | 3.13417200  |
| C | 1.85642300  | -0.96488900 | -1.76904400 |
| H | 2.56255000  | -1.42941300 | -2.47576400 |

|   |             |             |             |
|---|-------------|-------------|-------------|
| H | 2.05670900  | 0.11469400  | -1.77494600 |
| C | 2.12940900  | -1.52174900 | -0.37355900 |
| H | 1.88958200  | -2.59346300 | -0.37305400 |
| H | 1.44968200  | -1.03845100 | 0.34629000  |
| C | 3.57937800  | -1.33569800 | 0.09134000  |
| H | 3.69396200  | -1.76399300 | 1.09665900  |
| H | 4.24527900  | -1.90587900 | -0.56782800 |
| C | 4.01669400  | 0.11205000  | 0.10611800  |
| C | 3.29531600  | 1.06361600  | 0.83434900  |
| C | 5.12711800  | 0.53549800  | -0.62543900 |
| C | 3.67379600  | 2.40176100  | 0.82885600  |
| H | 2.41268800  | 0.76544200  | 1.39497300  |
| C | 5.51694600  | 1.87346800  | -0.62578800 |
| H | 5.69090000  | -0.19206000 | -1.20449100 |
| C | 4.78994100  | 2.81117700  | 0.10119100  |
| H | 3.08626200  | 3.12439500  | 1.38679200  |
| H | 6.38463800  | 2.18247900  | -1.20108500 |
| H | 5.08577500  | 3.85573700  | 0.09579900  |
| I | -0.72697600 | 1.53999400  | 0.86464500  |

**2a-I•2DMF\_conformer-3**

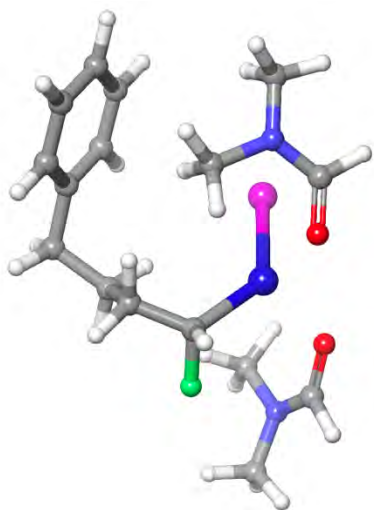

|    |             |             |             |
|----|-------------|-------------|-------------|
| C  | -1.14745500 | 1.41451300  | 1.45966700  |
| H  | -1.21478800 | 1.37049700  | 2.55736500  |
| F  | -2.37783500 | 2.03987200  | 1.05907900  |
| Zn | -1.12281300 | -0.47165100 | 0.71061300  |
| O  | -0.42920400 | -1.91144500 | 1.99378700  |
| C  | 0.60249500  | -2.54567900 | 1.70350900  |
| N  | 1.81044400  | -2.00891100 | 1.58792300  |
| H  | 0.56609600  | -3.63106000 | 1.54692000  |
| O  | -3.07884000 | -1.02977400 | 0.72545000  |
| C  | -4.03951700 | -0.24677700 | 0.65282900  |
| N  | -4.28735600 | 0.57128700  | -0.36268900 |
| H  | -4.79208600 | -0.22088400 | 1.45197800  |
| C  | 2.90079500  | -2.73793900 | 0.96529400  |
| H  | 3.81003900  | -2.62782700 | 1.56255800  |

|   |             |             |             |
|---|-------------|-------------|-------------|
| H | 2.64016000  | -3.79527400 | 0.88902400  |
| H | 3.07079400  | -2.33930300 | -0.04106800 |
| C | 1.99590100  | -0.57624500 | 1.76371400  |
| H | 1.22961600  | -0.20032600 | 2.44306900  |
| H | 2.98694700  | -0.39654100 | 2.18640900  |
| H | 1.92952200  | -0.06127800 | 0.79621300  |
| C | -3.33406000 | 0.67460900  | -1.45834700 |
| H | -2.53570000 | 1.37330600  | -1.18495200 |
| H | -2.90827200 | -0.30657700 | -1.67246100 |
| H | -3.85705900 | 1.04264700  | -2.34359200 |
| C | -5.24831600 | 1.64951000  | -0.22130000 |
| H | -5.90151400 | 1.45236800  | 0.63106500  |
| H | -4.71710800 | 2.59170500  | -0.05178900 |
| H | -5.85656700 | 1.72725400  | -1.12593700 |
| C | -0.03479000 | 2.37783700  | 1.09925100  |
| H | -0.18173300 | 3.34829900  | 1.59926600  |
| H | 0.90473600  | 1.96639700  | 1.49293000  |
| C | 0.10545400  | 2.61475300  | -0.40352800 |
| H | -0.72916300 | 3.23644600  | -0.74859300 |
| H | 0.02798800  | 1.65440000  | -0.93269800 |
| C | 1.43770200  | 3.27937200  | -0.78522400 |
| H | 1.40722100  | 3.57327500  | -1.84077200 |
| H | 1.57208500  | 4.19816600  | -0.20087700 |
| C | 2.61252400  | 2.35513200  | -0.56150600 |
| C | 2.81714200  | 1.26698900  | -1.41698100 |



|   |            |             |             |
|---|------------|-------------|-------------|
| C | 3.48872800 | 2.52746900  | 0.51391100  |
| C | 3.86958600 | 0.37982200  | -1.20739300 |
| H | 2.13361600 | 1.10210100  | -2.24600400 |
| C | 4.54835200 | 1.64636400  | 0.72519800  |
| H | 3.34038600 | 3.36726500  | 1.18885200  |
| C | 4.74201000 | 0.56829200  | -0.13574300 |
| H | 4.00373600 | -0.45873700 | -1.88476800 |
| H | 5.22327800 | 1.80480800  | 1.56142800  |
| H | 5.56957800 | -0.11711500 | 0.02342300  |
| I | 0.01634900 | -1.47468500 | -1.56599500 |

**2a-I•2DMF\_conformer-4**

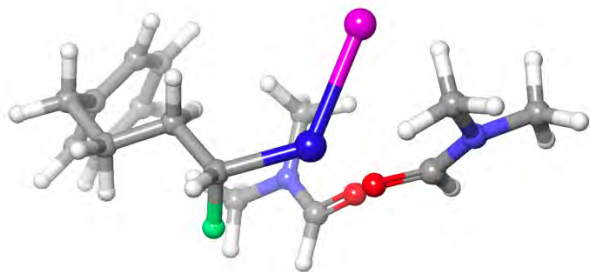

|    |             |            |             |
|----|-------------|------------|-------------|
| C  | -0.48805200 | 1.39760300 | -1.38355100 |
| H  | -0.24746200 | 1.93350000 | -2.31130400 |
| F  | -1.14883600 | 2.37421700 | -0.56434300 |
| Zn | 1.13492800  | 0.75412400 | -0.37136900 |
| O  | 2.93815000  | 1.69942600 | -0.46682000 |
| C  | 3.69584200  | 1.28681900 | 0.43456500  |

|   |             |             |             |
|---|-------------|-------------|-------------|
| N | 4.85661800  | 0.68859600  | 0.21130900  |
| H | 3.42361100  | 1.40062600  | 1.49269400  |
| O | 0.84143500  | 1.36505500  | 1.58825500  |
| C | -0.34827500 | 1.68098900  | 1.79393200  |
| N | -1.33515100 | 0.81030700  | 1.96184600  |
| H | -0.64658700 | 2.73178100  | 1.87050100  |
| C | 5.58241700  | 0.04122100  | 1.28918400  |
| H | 6.64137100  | 0.30840300  | 1.23850600  |
| H | 5.17662800  | 0.36152500  | 2.25029300  |
| H | 5.47249000  | -1.04508800 | 1.20186200  |
| C | 5.26088000  | 0.35759400  | -1.14733700 |
| H | 4.71840200  | 0.99783200  | -1.84047800 |
| H | 6.33730300  | 0.51732200  | -1.24905100 |
| H | 5.01441400  | -0.68986500 | -1.35271400 |
| C | -1.07590400 | -0.62240800 | 1.98068400  |
| H | -1.28430900 | -1.07772300 | 1.00682700  |
| H | -0.02999700 | -0.79665600 | 2.23268100  |
| H | -1.72858200 | -1.08123500 | 2.72869000  |
| C | -2.72203100 | 1.23879300  | 1.89369300  |
| H | -2.76706600 | 2.32911900  | 1.91119600  |
| H | -3.17423200 | 0.88381600  | 0.96148400  |
| H | -3.28344500 | 0.83075700  | 2.73843300  |
| C | -1.52514100 | 0.33280700  | -1.68743600 |
| H | -1.05965600 | -0.44127800 | -2.31348600 |
| H | -1.80531200 | -0.16782100 | -0.75173400 |

|   |             |             |             |
|---|-------------|-------------|-------------|
| C | -2.79200800 | 0.86489000  | -2.35747700 |
| H | -2.55112500 | 1.20455000  | -3.37252600 |
| H | -3.14145100 | 1.74333600  | -1.80158500 |
| C | -3.92228400 | -0.17778500 | -2.42250900 |
| H | -4.73069800 | 0.19971900  | -3.05903800 |
| H | -3.54440200 | -1.09348300 | -2.89360100 |
| C | -4.47730700 | -0.49970000 | -1.05513300 |
| C | -5.44474700 | 0.32851800  | -0.47586100 |
| C | -4.00738800 | -1.58690700 | -0.31155400 |
| C | -5.92985600 | 0.08053200  | 0.80580600  |
| H | -5.82182500 | 1.17708200  | -1.04238900 |
| C | -4.48420100 | -1.83704600 | 0.97433600  |
| H | -3.25885200 | -2.24438000 | -0.74826700 |
| C | -5.44919600 | -1.00457400 | 1.53682600  |
| H | -6.68756900 | 0.73127400  | 1.23201100  |
| H | -4.10708600 | -2.68979000 | 1.53151500  |
| H | -5.82931400 | -1.20340300 | 2.53425100  |
| I | 2.05817000  | -1.79448800 | -0.17674000 |

**2a-I•2DMF\_conformer-5**

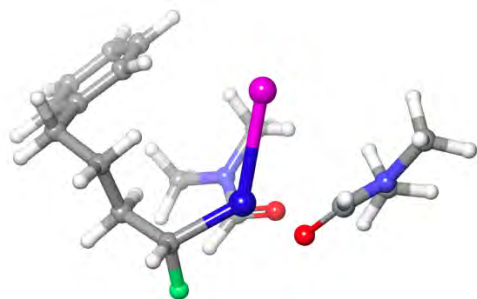

|    |             |             |             |
|----|-------------|-------------|-------------|
| C  | 0.15774600  | -2.49073600 | -0.90797300 |
| H  | -0.14768800 | -2.99423300 | -1.83457300 |
| F  | 0.14739300  | -3.51699600 | 0.09093600  |
| Zn | -1.14725600 | -1.08967800 | -0.26971100 |
| O  | -3.12686400 | -1.46779700 | -0.43691900 |
| C  | -3.99776900 | -0.58769200 | -0.57122100 |
| N  | -4.39290000 | 0.24382300  | 0.38125700  |
| H  | -4.52263700 | -0.46702300 | -1.52758400 |
| O  | -0.89774100 | -1.00694300 | 1.78461900  |
| C  | 0.29708700  | -1.30375100 | 2.00581700  |
| N  | 1.19897000  | -0.44980000 | 2.46898400  |
| H  | 0.67299500  | -2.31002400 | 1.78552000  |
| C  | -5.23768600 | 1.38499200  | 0.07714100  |
| H  | -4.64137900 | 2.30209900  | 0.12924600  |
| H  | -5.64425400 | 1.28535300  | -0.93084000 |
| H  | -6.06075300 | 1.43986900  | 0.79469100  |
| C  | -3.78196500 | 0.20710600  | 1.70226700  |
| H  | -3.33277900 | -0.77130300 | 1.86529800  |

|   |             |             |             |
|---|-------------|-------------|-------------|
| H | -3.00101500 | 0.97219400  | 1.77002500  |
| H | -4.55743400 | 0.39571900  | 2.44935100  |
| C | 2.59778500  | -0.82599900 | 2.59016000  |
| H | 2.95495500  | -0.60886900 | 3.60153200  |
| H | 2.70682700  | -1.89416900 | 2.39216100  |
| H | 3.19660400  | -0.26264300 | 1.86647000  |
| C | 0.86309700  | 0.94265200  | 2.72557200  |
| H | -0.19267800 | 1.09527300  | 2.50792000  |
| H | 1.07901400  | 1.18352000  | 3.77138400  |
| H | 1.46294100  | 1.58098600  | 2.07117500  |
| C | 1.60783400  | -2.06076800 | -1.05966100 |
| H | 1.95597700  | -1.55251600 | -0.14696800 |
| H | 2.24924400  | -2.94746900 | -1.18351900 |
| C | 1.80063900  | -1.11761400 | -2.24239000 |
| H | 1.10179200  | -0.27508000 | -2.15831700 |
| H | 1.54116700  | -1.63966100 | -3.17190500 |
| C | 3.23529400  | -0.58872500 | -2.35587500 |
| H | 3.92664400  | -1.43265800 | -2.47068400 |
| H | 3.32164600  | 0.01139400  | -3.27042400 |
| C | 3.67949700  | 0.25700700  | -1.18159600 |
| C | 2.92506400  | 1.36348200  | -0.77195200 |
| C | 4.87025400  | -0.01949400 | -0.50493100 |
| C | 3.36833100  | 2.18336000  | 0.26290200  |
| H | 1.98665600  | 1.59642000  | -1.26952800 |
| C | 5.31720300  | 0.79802600  | 0.53313000  |

|   |             |             |             |
|---|-------------|-------------|-------------|
| H | 5.46347200  | -0.87924800 | -0.80675000 |
| C | 4.56873600  | 1.90722100  | 0.91853800  |
| H | 2.77498600  | 3.04863200  | 0.54631300  |
| H | 6.25226800  | 0.56907000  | 1.03592300  |
| H | 4.91763700  | 2.55277700  | 1.71889100  |
| I | -1.15935100 | 1.60925000  | -0.76065600 |

**2a-I•2DMF\_conformer-6**

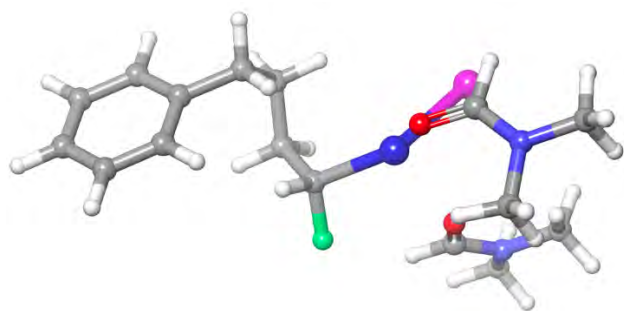

|    |             |             |             |
|----|-------------|-------------|-------------|
| C  | 1.41139900  | -0.40481700 | -0.96543100 |
| H  | 2.07074100  | 0.40619300  | -1.29985300 |
| F  | 1.05567900  | -1.09200400 | -2.16725000 |
| Zn | -0.29296400 | 0.26626200  | -0.14428300 |
| O  | -0.72901900 | 2.20932600  | 0.22332800  |
| C  | -1.86200200 | 2.42784500  | 0.69469900  |
| N  | -2.88172000 | 2.90103200  | -0.01082800 |
| H  | -2.08378100 | 2.23429500  | 1.75099700  |
| O  | -1.79287300 | 0.23290400  | -1.60588800 |
| C  | -1.90993200 | -0.96726300 | -1.92750700 |

|   |             |             |             |
|---|-------------|-------------|-------------|
| N | -3.05497200 | -1.63805500 | -1.88750000 |
| H | -1.03386000 | -1.54322400 | -2.25300500 |
| C | -2.75365300 | 3.16211700  | -1.43644500 |
| H | -3.01768000 | 4.20400700  | -1.64102600 |
| H | -1.72691200 | 2.96323000  | -1.73620100 |
| H | -3.42130900 | 2.49776500  | -1.99230000 |
| C | -4.18651900 | 3.10277600  | 0.59148200  |
| H | -4.15304400 | 2.82276500  | 1.64567900  |
| H | -4.48605500 | 4.15158900  | 0.50363400  |
| H | -4.92915700 | 2.47854200  | 0.08486400  |
| C | -4.26017000 | -1.03244300 | -1.34805800 |
| H | -4.51999300 | -1.52096400 | -0.40359500 |
| H | -4.06050100 | 0.02121500  | -1.15758800 |
| H | -5.08061000 | -1.14237400 | -2.06393800 |
| C | -3.09713300 | -3.06504800 | -2.14981300 |
| H | -2.13342200 | -3.39414600 | -2.54173200 |
| H | -3.30798700 | -3.60472700 | -1.22085800 |
| H | -3.87752900 | -3.28841400 | -2.88310600 |
| C | 2.21105500  | -1.37603000 | -0.11647000 |
| H | 1.62466400  | -2.29495100 | 0.00962100  |
| H | 3.14373700  | -1.65596800 | -0.62764800 |
| C | 2.52702000  | -0.81108400 | 1.26876500  |
| H | 3.12417800  | -1.54151000 | 1.82743400  |
| H | 1.59115600  | -0.68282300 | 1.82981000  |
| C | 3.27347100  | 0.53328300  | 1.24148000  |

|   |             |             |             |
|---|-------------|-------------|-------------|
| H | 2.63583800  | 1.30315700  | 0.78834300  |
| H | 3.45612900  | 0.85361300  | 2.27459500  |
| C | 4.58673200  | 0.46399400  | 0.49727200  |
| C | 4.78851100  | 1.16538900  | -0.69248200 |
| C | 5.63091300  | -0.33073700 | 0.98317700  |
| C | 5.99583300  | 1.07573100  | -1.38313400 |
| H | 3.99065700  | 1.79468100  | -1.07950100 |
| C | 6.83806300  | -0.42380000 | 0.29912600  |
| H | 5.49369300  | -0.87902100 | 1.91256800  |
| C | 7.02430900  | 0.27935200  | -0.89013800 |
| H | 6.13066300  | 1.62976000  | -2.30723500 |
| H | 7.63673400  | -1.04422300 | 0.69470500  |
| H | 7.96575700  | 0.20724600  | -1.42578600 |
| I | -1.83622000 | -1.02471300 | 1.72631100  |

**2a-I•2DMF\_conformer-7**

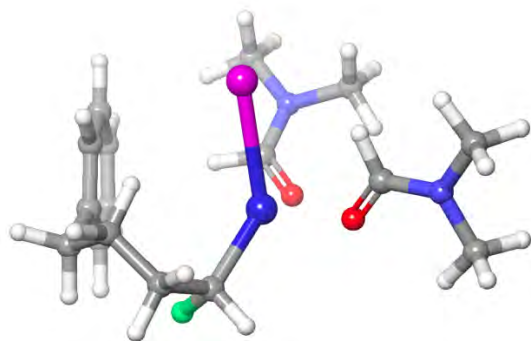

|   |             |             |             |
|---|-------------|-------------|-------------|
| C | -0.21144600 | -2.57334900 | -0.78680800 |
|---|-------------|-------------|-------------|



|    |             |             |             |
|----|-------------|-------------|-------------|
| H  | 0.54293800  | -3.13440200 | -1.35955600 |
| F  | -1.35984900 | -2.55876400 | -1.62244200 |
| Zn | 0.50122600  | -0.71720500 | -0.49093700 |
| O  | 2.53305000  | -0.73898900 | -0.87806400 |
| C  | 3.43212800  | -0.36985300 | -0.10912500 |
| N  | 4.73246500  | -0.49391900 | -0.37891900 |
| H  | 3.19559000  | 0.09561000  | 0.85736400  |
| O  | 0.11579900  | 0.73667400  | -1.84772500 |
| C  | -0.72590400 | 1.58525400  | -1.48727700 |
| N  | -0.43301800 | 2.86246700  | -1.27957000 |
| H  | -1.77827700 | 1.31519900  | -1.32858300 |
| C  | 5.74452400  | -0.05217100 | 0.56174000  |
| H  | 6.38278600  | 0.70802400  | 0.10016200  |
| H  | 5.26514700  | 0.37470900  | 1.44443300  |
| H  | 6.36922500  | -0.89687800 | 0.86924000  |
| C  | 5.18894800  | -1.09078300 | -1.62244500 |
| H  | 4.31939900  | -1.36288100 | -2.21836500 |
| H  | 5.80642200  | -0.37410100 | -2.17298000 |
| H  | 5.78601400  | -1.98307800 | -1.40943500 |
| C  | -1.40162300 | 3.76522600  | -0.68497900 |
| H  | -1.42420100 | 4.70575500  | -1.24287100 |
| H  | -2.38922100 | 3.30326600  | -0.70752800 |
| H  | -1.12510400 | 3.96317700  | 0.35682700  |
| C  | 0.94366400  | 3.32387200  | -1.33841100 |
| H  | 1.53938300  | 2.58093300  | -1.86641200 |

|   |             |             |             |
|---|-------------|-------------|-------------|
| H | 0.98092700  | 4.28131900  | -1.86559200 |
| H | 1.32867600  | 3.44407700  | -0.31955100 |
| C | -0.54936500 | -3.39258100 | 0.44214900  |
| H | -0.92381200 | -4.38286600 | 0.13592800  |
| H | 0.38715500  | -3.56413900 | 0.99212900  |
| C | -1.56780800 | -2.75962000 | 1.39144400  |
| H | -1.17689800 | -1.80174400 | 1.75842300  |
| H | -1.66811700 | -3.40901900 | 2.26844000  |
| C | -2.96279700 | -2.55802200 | 0.76276600  |
| H | -3.10712200 | -3.28507600 | -0.04197400 |
| H | -3.72345000 | -2.77903500 | 1.52253000  |
| C | -3.28198000 | -1.17380900 | 0.23878100  |
| C | -3.77293100 | -0.98709400 | -1.05786600 |
| C | -3.22022200 | -0.06206100 | 1.08724800  |
| C | -4.25642200 | 0.25257600  | -1.47173500 |
| H | -3.78707200 | -1.83157200 | -1.73934800 |
| C | -3.69656200 | 1.18136000  | 0.67845100  |
| H | -2.81367000 | -0.17415400 | 2.08914100  |
| C | -4.24144900 | 1.33774200  | -0.59621800 |
| H | -4.65643200 | 0.36698600  | -2.47496900 |
| H | -3.65366000 | 2.02263600  | 1.36483100  |
| H | -4.64791300 | 2.29689600  | -0.90709100 |
| I | 0.53512600  | 0.92347100  | 1.74706300  |

**2a-I•2DMF\_conformer-8**

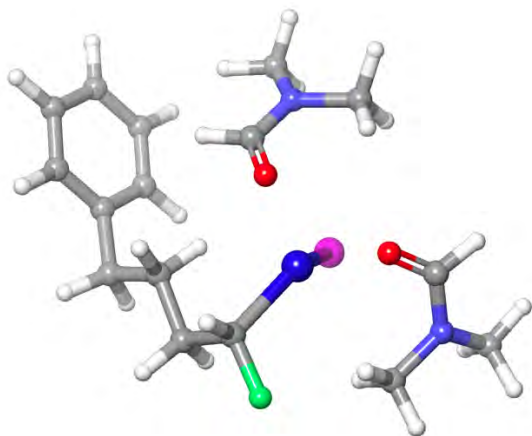

|    |             |             |             |
|----|-------------|-------------|-------------|
| C  | -0.88030600 | -2.63269900 | -0.85582900 |
| H  | -0.59889500 | -3.02771600 | -1.84280900 |
| F  | -2.04872400 | -3.34355400 | -0.48639400 |
| Zn | -1.11638300 | -0.63262200 | -0.91462700 |
| O  | 0.27944000  | 0.29691200  | -2.06948900 |
| C  | 1.17304700  | 1.03213000  | -1.60548500 |
| N  | 1.04440800  | 2.33667900  | -1.41454800 |
| H  | 2.15704000  | 0.62310300  | -1.32952900 |
| O  | -2.72513600 | 0.40551800  | -1.61537000 |
| C  | -3.57501100 | 0.86245600  | -0.82601900 |
| N  | -4.19204200 | 0.17705800  | 0.12492900  |
| H  | -3.88695500 | 1.91160100  | -0.90545100 |
| C  | -0.21773400 | 3.01119200  | -1.67457700 |
| H  | -0.03234200 | 3.89196400  | -2.29676500 |
| H  | -0.88900100 | 2.32227300  | -2.18733200 |

|   |             |             |             |
|---|-------------|-------------|-------------|
| H | -0.66503400 | 3.31472500  | -0.72237000 |
| C | 2.06944000  | 3.09813900  | -0.72352400 |
| H | 2.97599800  | 2.49662400  | -0.63216400 |
| H | 2.29121600  | 4.01098200  | -1.28373600 |
| H | 1.71354200  | 3.36035400  | 0.27900500  |
| C | -3.90120000 | -1.23435000 | 0.34249800  |
| H | -4.81923800 | -1.73085500 | 0.66602500  |
| H | -3.55075800 | -1.69744000 | -0.57792100 |
| H | -3.13299800 | -1.35150200 | 1.11549900  |
| C | -4.95265800 | 0.85796700  | 1.15858000  |
| H | -5.12766300 | 1.89504700  | 0.86636600  |
| H | -5.91291100 | 0.35619600  | 1.30270900  |
| H | -4.38403300 | 0.84453700  | 2.09455500  |
| C | 0.21984300  | -2.99888900 | 0.13293800  |
| H | -0.13812000 | -2.79942900 | 1.15246100  |
| H | 0.46986300  | -4.06900500 | 0.08232700  |
| C | 1.45347000  | -2.13838200 | -0.12317900 |
| H | 1.17316100  | -1.09062400 | 0.03622700  |
| H | 1.76979700  | -2.21868300 | -1.17380800 |
| C | 2.65242900  | -2.40738200 | 0.79149700  |
| H | 2.30520400  | -2.44607100 | 1.83087300  |
| H | 3.10474600  | -3.37859800 | 0.56047900  |
| C | 3.65975700  | -1.29533500 | 0.63051300  |
| C | 4.70649100  | -1.38907900 | -0.28956700 |
| C | 3.49228100  | -0.09638900 | 1.33362000  |

|   |             |             |             |
|---|-------------|-------------|-------------|
| C | 5.57345500  | -0.31815700 | -0.49917400 |
| H | 4.84161100  | -2.31278600 | -0.84738300 |
| C | 4.36426900  | 0.97130700  | 1.13661400  |
| H | 2.66561600  | -0.00223500 | 2.03487100  |
| C | 5.40727900  | 0.86540000  | 0.21617300  |
| H | 6.38333900  | -0.41115300 | -1.21646900 |
| H | 4.22930700  | 1.88740700  | 1.70526600  |
| H | 6.09006300  | 1.69595500  | 0.06441300  |
| I | -0.81080500 | 0.88024200  | 1.44673100  |

**2a-I•2DMF\_conformer-9**

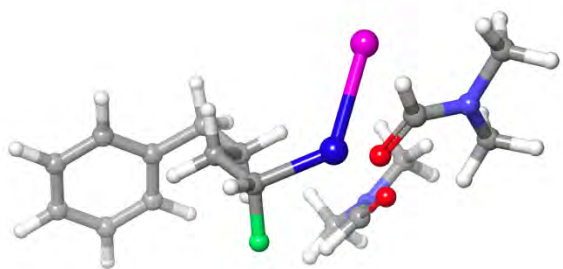

|    |             |             |             |
|----|-------------|-------------|-------------|
| C  | -0.70037200 | -0.74282600 | -1.75229800 |
| H  | -0.63679700 | -1.54203600 | -2.50072100 |
| F  | -1.17863600 | 0.39822300  | -2.47892300 |
| Zn | 1.09677100  | -0.27526900 | -0.96748700 |
| O  | 2.78309900  | -0.66417000 | -2.02258500 |
| C  | 3.85116600  | -1.03771200 | -1.50236400 |
| N  | 4.68366600  | -0.25830100 | -0.82781400 |

|   |             |             |             |
|---|-------------|-------------|-------------|
| H | 4.18403900  | -2.07911400 | -1.60070500 |
| O | 1.24154900  | 1.77337900  | -0.81541600 |
| C | 0.12348400  | 2.30998400  | -0.68419000 |
| N | -0.24309400 | 2.98718600  | 0.39920200  |
| H | -0.63922000 | 2.22258300  | -1.46666500 |
| C | 5.78468200  | -0.82023400 | -0.06581700 |
| H | 5.55137300  | -0.76529500 | 1.00282900  |
| H | 5.92964200  | -1.86605300 | -0.34228900 |
| H | 6.70191400  | -0.26202300 | -0.27191400 |
| C | 4.37236500  | 1.14417900  | -0.59532600 |
| H | 3.62146700  | 1.47042200  | -1.31324200 |
| H | 3.97577100  | 1.26700900  | 0.41841700  |
| H | 5.28809400  | 1.73010500  | -0.71303800 |
| C | 0.61374000  | 3.04449700  | 1.57425300  |
| H | 0.14067100  | 2.50066800  | 2.39824000  |
| H | 1.56408700  | 2.56802500  | 1.33889000  |
| H | 0.76914100  | 4.08714000  | 1.86703000  |
| C | -1.58123400 | 3.53281600  | 0.52675100  |
| H | -2.11628900 | 3.42125100  | -0.41826900 |
| H | -2.12965600 | 2.99851300  | 1.31085200  |
| H | -1.52958400 | 4.59418400  | 0.78713100  |
| C | -1.79032000 | -1.10436100 | -0.75696800 |
| H | -2.72871500 | -1.33471500 | -1.28202800 |
| H | -1.47917700 | -2.01569600 | -0.22638500 |
| C | -2.05352700 | 0.00290800  | 0.26107600  |

|   |             |             |             |
|---|-------------|-------------|-------------|
| H | -2.35414700 | 0.90892700  | -0.28390600 |
| H | -1.11991500 | 0.23153700  | 0.79723800  |
| C | -3.13410800 | -0.34513500 | 1.29483200  |
| H | -2.84411200 | -1.26603900 | 1.81439600  |
| H | -3.17357000 | 0.44536300  | 2.05539000  |
| C | -4.50269100 | -0.51009700 | 0.67928800  |
| C | -5.04915500 | -1.77337200 | 0.44488900  |
| C | -5.24024900 | 0.61363800  | 0.29538700  |
| C | -6.29822300 | -1.91225100 | -0.15603400 |
| H | -4.48548600 | -2.65636600 | 0.73610500  |
| C | -6.48845200 | 0.48236100  | -0.30434800 |
| H | -4.82763300 | 1.60496300  | 0.47508900  |
| C | -7.02225700 | -0.78450500 | -0.53212000 |
| H | -6.70598000 | -2.90351800 | -0.32946400 |
| H | -7.04738100 | 1.36793400  | -0.59165100 |
| H | -7.99656300 | -0.89072300 | -0.99866400 |
| I | 1.94721400  | -0.93845700 | 1.54744300  |

**2a-I•2DMF\_conformer-10**

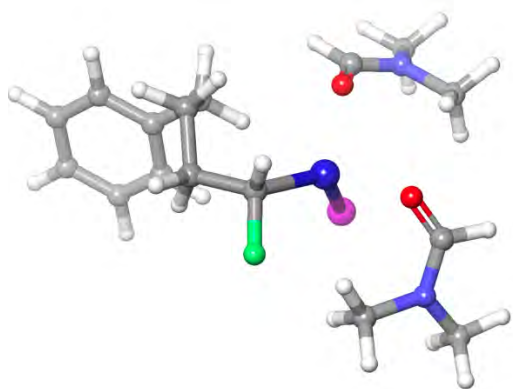

|    |             |             |             |
|----|-------------|-------------|-------------|
| C  | -0.34890500 | -2.01325400 | 1.73372300  |
| H  | -0.15012000 | -2.08567500 | 2.81453200  |
| F  | 0.09622600  | -3.25282900 | 1.19789600  |
| Zn | 0.73467600  | -0.50004900 | 0.97540300  |
| O  | 0.51249200  | 1.26179700  | 1.99864400  |
| C  | 0.35358700  | 2.36680600  | 1.44938200  |
| N  | 1.32981000  | 3.13209100  | 0.98073800  |
| H  | -0.65247400 | 2.79268100  | 1.33182200  |
| O  | 2.77426800  | -0.63058500 | 1.22245000  |
| C  | 3.58042000  | -0.79991400 | 0.28954600  |
| N  | 3.53576400  | -1.76915000 | -0.61228600 |
| H  | 4.43595200  | -0.11984400 | 0.17503100  |
| C  | 2.71388100  | 2.68794200  | 1.01739700  |
| H  | 3.33944200  | 3.49981400  | 1.39992500  |
| H  | 2.79076500  | 1.81258000  | 1.66227500  |
| H  | 3.03083800  | 2.42200700  | 0.00256000  |



|   |             |             |             |
|---|-------------|-------------|-------------|
| C | 1.04171500  | 4.30756000  | 0.17839900  |
| H | -0.01832500 | 4.55572300  | 0.25392900  |
| H | 1.63595100  | 5.15394000  | 0.53358400  |
| H | 1.28353500  | 4.10074300  | -0.86961300 |
| C | 4.38722700  | -1.73308600 | -1.78801500 |
| H | 3.78196100  | -1.48943200 | -2.66759800 |
| H | 5.15858900  | -0.97040900 | -1.66538200 |
| H | 4.86322300  | -2.70685000 | -1.93055900 |
| C | 2.47898900  | -2.77197200 | -0.60431200 |
| H | 1.99864800  | -2.81827100 | 0.37175100  |
| H | 1.72809600  | -2.52746500 | -1.36339800 |
| H | 2.92296200  | -3.74536400 | -0.83027600 |
| C | -1.85906500 | -1.97256500 | 1.56058700  |
| H | -2.11798800 | -2.05064700 | 0.49669700  |
| H | -2.30045700 | -2.85130700 | 2.04986500  |
| C | -2.45132700 | -0.68356000 | 2.14738700  |
| H | -1.82458400 | -0.34062500 | 2.98225400  |
| H | -3.44532000 | -0.87957300 | 2.56505900  |
| C | -2.57804000 | 0.45545000  | 1.12078400  |
| H | -2.78768600 | 1.39262300  | 1.65437400  |
| H | -1.62341300 | 0.59107500  | 0.59873200  |
| C | -3.66116900 | 0.20686600  | 0.09855400  |
| C | -5.00834300 | 0.30012600  | 0.46245000  |
| C | -3.34640500 | -0.14485200 | -1.21558800 |
| C | -6.01705200 | 0.04704200  | -0.46084100 |

|   |             |             |             |
|---|-------------|-------------|-------------|
| H | -5.26579300 | 0.57769100  | 1.48276700  |
| C | -4.35464000 | -0.40103100 | -2.14337600 |
| H | -2.30187600 | -0.20967900 | -1.51359600 |
| C | -5.69164700 | -0.30634100 | -1.76956000 |
| H | -7.05784200 | 0.12739900  | -0.16132000 |
| H | -4.09108000 | -0.67251300 | -3.16110800 |
| H | -6.47726600 | -0.50401200 | -2.49235400 |
| I | 0.83867000  | 0.55397600  | -1.59566300 |

**2a-I•2DMF\_conformer-11**

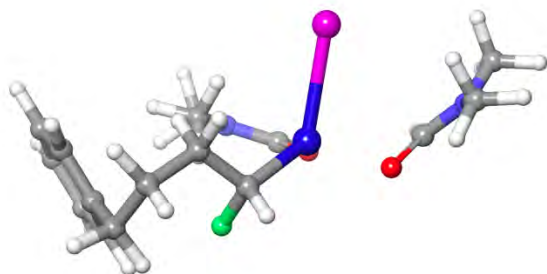

|    |             |             |             |
|----|-------------|-------------|-------------|
| C  | -0.66061900 | -1.77407400 | -0.74077900 |
| H  | -0.37170300 | -2.71728900 | -1.22457300 |
| F  | -1.62252800 | -1.19209000 | -1.63637400 |
| Zn | 0.85183600  | -0.45642900 | -0.59430600 |
| O  | 2.50557600  | -0.77556400 | -1.76131100 |
| C  | 3.40567600  | 0.05686300  | -1.54004800 |
| N  | 4.59760800  | -0.24921900 | -1.04544700 |
| H  | 3.25111400  | 1.12329900  | -1.75247800 |

|   |             |             |             |
|---|-------------|-------------|-------------|
| O | 0.62577700  | 1.39571800  | -1.43422700 |
| C | -0.08665500 | 2.40255600  | -1.28790900 |
| N | -1.14049700 | 2.49771300  | -0.49223200 |
| H | 0.14572300  | 3.31376800  | -1.85450300 |
| C | 5.50553800  | 0.78984700  | -0.59494400 |
| H | 6.51925600  | 0.57572800  | -0.94404600 |
| H | 5.18533500  | 1.75484200  | -0.99175900 |
| H | 5.49286000  | 0.83655800  | 0.49960500  |
| C | 4.86833800  | -1.60310400 | -0.58587600 |
| H | 4.19267500  | -2.28839000 | -1.09458200 |
| H | 5.90616800  | -1.85790800 | -0.81462000 |
| H | 4.69828600  | -1.65928800 | 0.49535100  |
| C | -1.91345600 | 3.72198700  | -0.38594800 |
| H | -1.87118300 | 4.10578600  | 0.63751200  |
| H | -1.51026900 | 4.47548200  | -1.06557900 |
| H | -2.95659800 | 3.52025800  | -0.64672600 |
| C | -1.56934700 | 1.33672100  | 0.28714800  |
| H | -1.77020400 | 0.50241200  | -0.38776700 |
| H | -0.79743700 | 1.06983900  | 1.01720400  |
| H | -2.49248500 | 1.58728100  | 0.81159700  |
| C | -1.36569300 | -2.09683300 | 0.56580800  |
| H | -0.61528300 | -2.55621500 | 1.22349200  |
| H | -1.67126000 | -1.17424000 | 1.07726800  |
| C | -2.57829400 | -3.03057100 | 0.47775000  |
| H | -2.94498400 | -3.22117200 | 1.49516400  |

|   |             |             |             |
|---|-------------|-------------|-------------|
| H | -2.25902900 | -4.00383500 | 0.08357500  |
| C | -3.74067900 | -2.52688800 | -0.39537100 |
| H | -3.44706000 | -2.56577600 | -1.44596400 |
| H | -4.58511900 | -3.21864700 | -0.27378000 |
| C | -4.22203400 | -1.12608000 | -0.08299700 |
| C | -4.40649100 | -0.19434300 | -1.10870800 |
| C | -4.52669200 | -0.73296800 | 1.22479600  |
| C | -4.90313500 | 1.08018300  | -0.84447100 |
| H | -4.14667800 | -0.47599100 | -2.12506400 |
| C | -5.01608100 | 0.54256200  | 1.49808800  |
| H | -4.38604500 | -1.43737100 | 2.04115100  |
| C | -5.21332300 | 1.45447600  | 0.46192000  |
| H | -5.05339900 | 1.77980400  | -1.66244300 |
| H | -5.25145400 | 0.82156600  | 2.52094000  |
| H | -5.60923000 | 2.44412300  | 0.67138900  |
| I | 2.16382600  | 0.24876100  | 1.71516000  |

**2a-I•2DMF\_conformer-12**

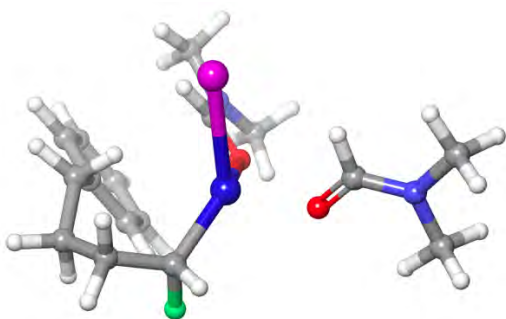

|    |             |             |             |
|----|-------------|-------------|-------------|
| C  | 0.32243400  | -2.01623200 | -1.70549300 |
| H  | 1.30344000  | -2.35623300 | -2.07185000 |
| F  | -0.37964900 | -1.62086700 | -2.88278700 |
| Zn | 0.72461000  | -0.44571300 | -0.50845500 |
| O  | 2.37919800  | 0.56430800  | -1.20083200 |
| C  | 3.43176400  | 0.72407300  | -0.56520300 |
| N  | 4.51634900  | 1.31368300  | -1.06884200 |
| H  | 3.52290600  | 0.38132300  | 0.47426600  |
| O  | -0.37059400 | 1.24163500  | -0.33938900 |
| C  | -1.13120500 | 1.44970000  | 0.62342600  |
| N  | -1.94298100 | 2.49697800  | 0.70388200  |
| H  | -1.15761600 | 0.77171600  | 1.48629000  |
| C  | 4.53667200  | 1.81314300  | -2.43290200 |
| H  | 5.32216000  | 1.30616500  | -3.00208700 |
| H  | 3.56763900  | 1.61940400  | -2.88976200 |
| H  | 4.73794600  | 2.88906200  | -2.43112400 |
| C  | 5.72374400  | 1.47206800  | -0.28045500 |

|   |             |             |             |
|---|-------------|-------------|-------------|
| H | 5.56901400  | 1.05643300  | 0.71674300  |
| H | 6.55838200  | 0.94967400  | -0.75874900 |
| H | 5.97789900  | 2.53287200  | -0.18872200 |
| C | -2.75883100 | 2.73392000  | 1.87914400  |
| H | -3.80698200 | 2.82872300  | 1.58263000  |
| H | -2.66490400 | 1.89132300  | 2.56649700  |
| H | -2.43722900 | 3.65081500  | 2.38446200  |
| C | -1.99823900 | 3.48529500  | -0.35921700 |
| H | -1.45988500 | 3.09844900  | -1.22309500 |
| H | -3.04295200 | 3.66477200  | -0.62622200 |
| H | -1.54130900 | 4.42321900  | -0.02530800 |
| C | -0.38855000 | -3.24403300 | -1.15768500 |
| H | -0.29842400 | -4.07576800 | -1.87139700 |
| H | 0.12484900  | -3.55353400 | -0.23642800 |
| C | -1.88098500 | -3.03566900 | -0.88237100 |
| H | -2.32980900 | -4.00178800 | -0.62954500 |
| H | -2.35314300 | -2.71730200 | -1.81681000 |
| C | -2.19666500 | -2.02400400 | 0.24132100  |
| H | -2.65319500 | -2.53536100 | 1.09526800  |
| H | -1.25269700 | -1.61800600 | 0.63354000  |
| C | -3.08867700 | -0.87326400 | -0.16783500 |
| C | -2.89029300 | -0.20864700 | -1.38577000 |
| C | -4.10700400 | -0.42352500 | 0.67730100  |
| C | -3.69381600 | 0.87061300  | -1.74150400 |
| H | -2.09692400 | -0.54148900 | -2.05225200 |

|   |             |             |             |
|---|-------------|-------------|-------------|
| C | -4.92139000 | 0.64958700  | 0.31698000  |
| H | -4.27639300 | -0.93587100 | 1.62166500  |
| C | -4.71573900 | 1.30282800  | -0.89527600 |
| H | -3.52687400 | 1.37183800  | -2.69091800 |
| H | -5.72317100 | 0.96545500  | 0.97913900  |
| H | -5.35545400 | 2.13147100  | -1.18667900 |
| I | 1.42319800  | -0.80029200 | 2.13677200  |

**2a-I•2DMF\_conformer-13**

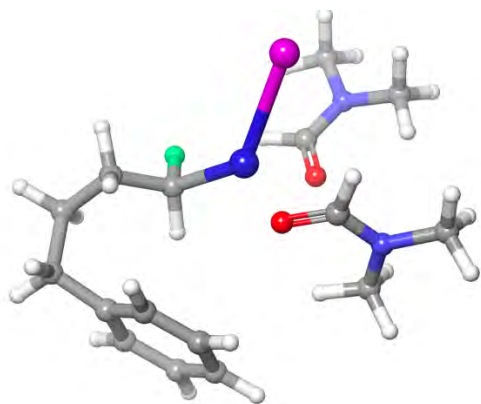

|    |             |             |             |
|----|-------------|-------------|-------------|
| C  | -1.41242300 | -1.35754100 | 0.37179300  |
| H  | -2.12855900 | -0.65116500 | 0.80726200  |
| F  | -0.97653000 | -2.13363500 | 1.49796800  |
| Zn | 0.14218800  | -0.32347700 | -0.35006900 |
| O  | -0.14122800 | 1.45057600  | -1.29322000 |
| C  | 0.84383500  | 2.21198400  | -1.31287000 |
| N  | 0.99800000  | 3.24154500  | -0.48925200 |

|   |             |             |             |
|---|-------------|-------------|-------------|
| H | 1.65922200  | 2.06608400  | -2.03323800 |
| O | 0.97079300  | 0.68498200  | 1.31992300  |
| C | 1.38856300  | -0.25421800 | 2.02814500  |
| N | 2.63365700  | -0.34697900 | 2.48101600  |
| H | 0.72424600  | -1.08596700 | 2.30113300  |
| C | 2.17782700  | 4.08344800  | -0.53911000 |
| H | 2.71670700  | 4.02569900  | 0.41187700  |
| H | 2.83727100  | 3.74746600  | -1.34122800 |
| H | 1.89242000  | 5.12431600  | -0.71979400 |
| C | 0.03306700  | 3.50228400  | 0.56864500  |
| H | -0.79905000 | 2.80618600  | 0.46581800  |
| H | 0.51049100  | 3.34677800  | 1.54019000  |
| H | -0.32307300 | 4.53423100  | 0.49076500  |
| C | 3.09510700  | -1.54711900 | 3.15509800  |
| H | 3.60833700  | -1.28137100 | 4.08380800  |
| H | 2.24269900  | -2.18790800 | 3.38634800  |
| H | 3.78422700  | -2.09389900 | 2.50311600  |
| C | 3.64717100  | 0.61030100  | 2.07253400  |
| H | 3.15085800  | 1.45919600  | 1.60453000  |
| H | 4.21533700  | 0.93748800  | 2.94828700  |
| H | 4.31761600  | 0.14260300  | 1.34390300  |
| C | -2.13925000 | -2.32159100 | -0.55435100 |
| H | -2.20089700 | -1.88995500 | -1.56266100 |
| H | -1.50579700 | -3.21086700 | -0.65267400 |
| C | -3.54746600 | -2.71625400 | -0.08429100 |



|   |             |             |             |
|---|-------------|-------------|-------------|
| H | -3.55965300 | -2.73214900 | 1.01305400  |
| H | -3.79834900 | -3.73018300 | -0.41765000 |
| C | -4.64079700 | -1.76351900 | -0.60912500 |
| H | -4.67969500 | -1.84929800 | -1.70208200 |
| H | -5.61707200 | -2.08479600 | -0.22763400 |
| C | -4.39658600 | -0.32298500 | -0.23045200 |
| C | -4.78730500 | 0.15328000  | 1.02506800  |
| C | -3.69673700 | 0.53905800  | -1.07897100 |
| C | -4.46803700 | 1.44430300  | 1.43264700  |
| H | -5.33368400 | -0.50694000 | 1.69483500  |
| C | -3.36704000 | 1.83113400  | -0.67439800 |
| H | -3.39055200 | 0.19039700  | -2.06231600 |
| C | -3.74909800 | 2.28648200  | 0.58520700  |
| H | -4.77842400 | 1.79435700  | 2.41261500  |
| H | -2.80476500 | 2.47462300  | -1.34429300 |
| H | -3.50030300 | 3.29553100  | 0.90177900  |
| I | 2.55359400  | -1.11989000 | -1.31914700 |

**2a-I•2DMF\_conformer-14**

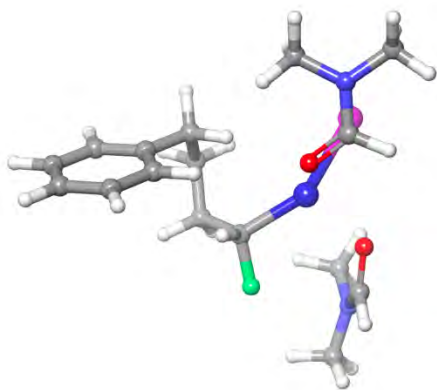

|    |             |             |             |
|----|-------------|-------------|-------------|
| C  | 0.80788800  | -1.66631900 | -0.01888100 |
| H  | 1.56560100  | -1.40779000 | -0.77305400 |
| F  | 0.40035200  | -2.99394000 | -0.37548200 |
| Zn | -0.70806300 | -0.37157800 | -0.29977900 |
| O  | -0.10727200 | 1.03289000  | -1.69058300 |
| C  | -0.94078900 | 1.93946500  | -1.88728200 |
| N  | -0.75997500 | 3.19969300  | -1.52068300 |
| H  | -1.89334100 | 1.73417300  | -2.39382000 |
| O  | -2.06431400 | -1.27459600 | -1.54788800 |
| C  | -2.12119700 | -2.51284400 | -1.63902800 |
| N  | -2.33383300 | -3.35049700 | -0.63190100 |
| H  | -2.03204500 | -2.99787100 | -2.61969300 |
| C  | -1.85655800 | 4.15185400  | -1.54977200 |
| H  | -1.52015200 | 5.09417400  | -1.98990400 |
| H  | -2.67664400 | 3.74805900  | -2.14599900 |
| H  | -2.21643600 | 4.32584300  | -0.53000300 |

|   |             |             |             |
|---|-------------|-------------|-------------|
| C | 0.41281600  | 3.55532300  | -0.73346400 |
| H | 1.25054000  | 2.92525200  | -1.03169600 |
| H | 0.65311000  | 4.60506000  | -0.91439400 |
| H | 0.20077700  | 3.39783700  | 0.33090800  |
| C | -2.07418500 | -4.77026400 | -0.79097300 |
| H | -2.86972600 | -5.34887300 | -0.31482600 |
| H | -2.03592600 | -5.02201700 | -1.85255300 |
| H | -1.11082100 | -5.01300600 | -0.33196400 |
| C | -2.41534700 | -2.85651700 | 0.73465500  |
| H | -2.85400400 | -1.85726400 | 0.74392800  |
| H | -3.05168800 | -3.53011700 | 1.31316300  |
| H | -1.41202200 | -2.83263500 | 1.17360000  |
| C | 1.50257900  | -1.76778100 | 1.32994900  |
| H | 0.90124800  | -2.41308500 | 1.98398100  |
| H | 2.48252300  | -2.25576500 | 1.22567700  |
| C | 1.66742600  | -0.40898900 | 2.01792300  |
| H | 2.30752800  | -0.52447700 | 2.90090900  |
| H | 0.69079900  | -0.06455100 | 2.38172300  |
| C | 2.23778100  | 0.69260600  | 1.11109500  |
| H | 1.51788800  | 0.90748800  | 0.31132900  |
| H | 2.32670600  | 1.61619700  | 1.69830800  |
| C | 3.57005500  | 0.36071400  | 0.48071300  |
| C | 3.71209100  | 0.33213600  | -0.90862100 |
| C | 4.68920800  | 0.07820800  | 1.27043500  |
| C | 4.93856500  | 0.03005300  | -1.49721000 |

|   |             |             |             |
|---|-------------|-------------|-------------|
| H | 2.84517500  | 0.54734200  | -1.53129700 |
| C | 5.91537200  | -0.22524400 | 0.68764100  |
| H | 4.59729500  | 0.10092500  | 2.35389600  |
| C | 6.04417000  | -0.25054000 | -0.70015700 |
| H | 5.02822600  | 0.01181000  | -2.57924300 |
| H | 6.77373900  | -0.44106500 | 1.31685600  |
| H | 7.00074400  | -0.48770100 | -1.15530700 |
| I | -2.19510000 | 1.24854600  | 1.28935700  |

**2a-I•2DMF\_conformer-15**

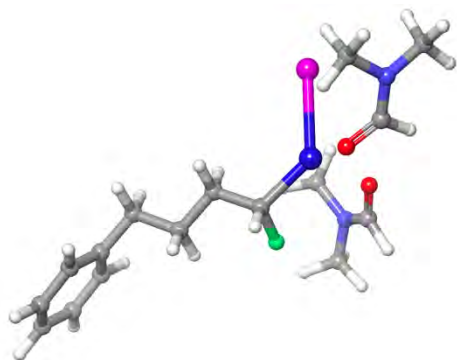

|    |             |             |             |
|----|-------------|-------------|-------------|
| C  | -0.71148900 | 0.14425000  | -0.99406700 |
| H  | -0.92047800 | -0.23042500 | -2.00591800 |
| F  | -1.14803700 | 1.51441700  | -1.02949800 |
| Zn | 1.25582700  | 0.12981100  | -0.56572700 |
| O  | 2.59589400  | -0.56304100 | -1.94807800 |
| C  | 3.76944100  | -0.32924200 | -1.59689100 |
| N  | 4.67738400  | -1.26601700 | -1.36443600 |

|   |             |             |             |
|---|-------------|-------------|-------------|
| H | 4.11888400  | 0.70266700  | -1.45593900 |
| O | 1.96059500  | 2.05004600  | -0.79768800 |
| C | 1.21549700  | 3.04509400  | -0.80228900 |
| N | 0.43622900  | 3.42463900  | 0.20153900  |
| H | 1.19541800  | 3.71602600  | -1.67105500 |
| C | 5.95083000  | -0.93476400 | -0.75103400 |
| H | 6.76236800  | -1.43979400 | -1.28172300 |
| H | 6.11029500  | 0.14402000  | -0.79359800 |
| H | 5.94374500  | -1.25072700 | 0.29774100  |
| C | 4.30157900  | -2.67189000 | -1.38245500 |
| H | 3.38038500  | -2.78109900 | -1.95177700 |
| H | 5.10357700  | -3.25147300 | -1.84676000 |
| H | 4.13655700  | -3.01529300 | -0.35537600 |
| C | -0.60596700 | 4.41295700  | -0.01078400 |
| H | -0.63815600 | 5.10557800  | 0.83392000  |
| H | -0.40289400 | 4.97414500  | -0.92492500 |
| H | -1.57077000 | 3.90567000  | -0.11093000 |
| C | 0.31128300  | 2.59060900  | 1.38765700  |
| H | 1.25192400  | 2.07276500  | 1.57961500  |
| H | 0.06967500  | 3.22763100  | 2.24142400  |
| H | -0.49121000 | 1.86093400  | 1.23516600  |
| C | -1.62343300 | -0.58622700 | -0.02694300 |
| H | -1.33943100 | -1.64827500 | -0.04157700 |
| H | -1.44139400 | -0.24894600 | 1.00469400  |
| C | -3.10961600 | -0.43887700 | -0.35255400 |

|   |             |             |             |
|---|-------------|-------------|-------------|
| H | -3.30179100 | -0.81840300 | -1.36542200 |
| H | -3.37232300 | 0.62511100  | -0.36761300 |
| C | -4.01567600 | -1.17560300 | 0.64162000  |
| H | -3.74761900 | -2.23951300 | 0.65353200  |
| H | -3.82746500 | -0.79254600 | 1.65244600  |
| C | -5.47650900 | -1.02025000 | 0.29963500  |
| C | -6.21969700 | 0.05063800  | 0.80219600  |
| C | -6.10393900 | -1.91197800 | -0.57406300 |
| C | -7.55393700 | 0.22605000  | 0.44582800  |
| H | -5.74385600 | 0.75146800  | 1.48452400  |
| C | -7.43764200 | -1.74206800 | -0.93457300 |
| H | -5.53712500 | -2.75064400 | -0.97208500 |
| C | -8.16781800 | -0.67119100 | -0.42476700 |
| H | -8.11641800 | 1.06183600  | 0.85123300  |
| H | -7.90870400 | -2.44855100 | -1.61146500 |
| H | -9.20904800 | -0.53858800 | -0.70159500 |
| I | 2.50507100  | -0.81413400 | 1.65298300  |

**2a'-conformer-1**

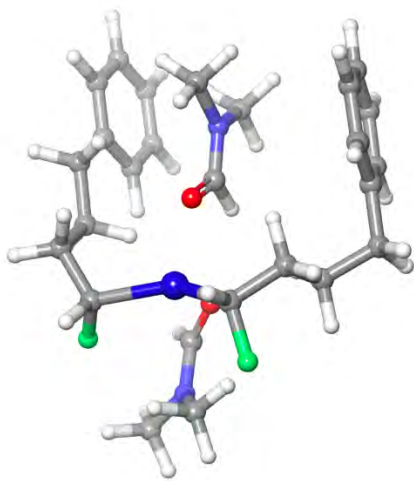

|    |             |             |             |
|----|-------------|-------------|-------------|
| Zn | -1.90072900 | -0.42381900 | -0.90054400 |
| O  | -1.47751900 | -0.71085800 | 1.19979400  |
| C  | -1.95558700 | -1.68379800 | 1.80032900  |
| N  | -3.24592200 | -2.00467900 | 1.85273900  |
| H  | -1.30608900 | -2.35051100 | 2.38551900  |
| O  | 0.08618100  | 0.33469800  | -1.10481200 |
| C  | 0.91548400  | 0.45852300  | -0.19128700 |
| N  | 2.19077300  | 0.79979400  | -0.37933700 |
| H  | 0.63804800  | 0.27007900  | 0.85493300  |
| C  | -4.21170400 | -1.28683800 | 1.03510100  |
| H  | -5.17975300 | -1.29777300 | 1.54236100  |
| H  | -3.90332300 | -0.25291100 | 0.88562200  |
| H  | -4.30969900 | -1.78026900 | 0.06072000  |
| C  | -3.64248500 | -3.32608600 | 2.30157500  |

|   |             |             |             |
|---|-------------|-------------|-------------|
| H | -2.84724000 | -3.76509300 | 2.90765200  |
| H | -4.55137400 | -3.25527700 | 2.90460000  |
| H | -3.82105500 | -3.96763300 | 1.43258800  |
| C | 2.70976600  | 1.05932400  | -1.70847400 |
| H | 3.47607300  | 0.31384400  | -1.95343800 |
| H | 1.88953100  | 1.00223900  | -2.42286300 |
| H | 3.15540800  | 2.05869200  | -1.73514600 |
| C | 3.15094200  | 0.82232600  | 0.70799000  |
| H | 2.63397200  | 0.66449700  | 1.65692100  |
| H | 3.89501400  | 0.03168900  | 0.56842100  |
| H | 3.64820400  | 1.79509000  | 0.73322300  |
| C | -3.00058200 | 1.24490300  | -1.28393300 |
| C | -2.34659600 | 2.55378100  | -0.87727800 |
| H | -1.37898500 | 2.61571600  | -1.39259800 |
| H | -2.94832600 | 3.41841700  | -1.20608600 |
| C | -2.14797600 | 2.65827800  | 0.63268500  |
| H | -1.51617700 | 1.83016900  | 0.98358500  |
| H | -3.12555700 | 2.52982800  | 1.11106100  |
| C | -1.53937600 | 3.99333700  | 1.08975400  |
| H | -2.10526600 | 4.81650300  | 0.63545200  |
| H | -1.65139800 | 4.09362700  | 2.17536900  |
| C | -0.07803800 | 4.12967900  | 0.73883600  |
| C | 0.90647000  | 3.82712500  | 1.68469700  |
| C | 0.33309900  | 4.54497000  | -0.53205000 |
| C | 2.25870100  | 3.95643500  | 1.38153900  |



|   |             |             |             |
|---|-------------|-------------|-------------|
| H | 0.60280500  | 3.51194200  | 2.68060100  |
| C | 1.68472300  | 4.65255600  | -0.84927300 |
| H | -0.41885300 | 4.79852000  | -1.27483500 |
| C | 2.65407100  | 4.36470500  | 0.10924000  |
| H | 3.00509500  | 3.74628600  | 2.14305800  |
| H | 1.98118300  | 4.98132000  | -1.84126700 |
| H | 3.70893400  | 4.47362600  | -0.12835000 |
| C | -1.87009400 | -2.40075800 | -1.45348400 |
| H | -2.63098500 | -2.64430700 | -2.20905700 |
| C | -0.51656900 | -2.86558800 | -1.96520200 |
| H | -0.55501800 | -3.87803300 | -2.39605100 |
| H | -0.22056900 | -2.18767800 | -2.77901100 |
| C | 0.54720500  | -2.83681200 | -0.86062400 |
| H | 0.53157000  | -3.78414600 | -0.30848500 |
| H | 0.27920700  | -2.05894800 | -0.13558300 |
| C | 1.94219100  | -2.56522100 | -1.40981000 |
| H | 2.20186600  | -3.33659800 | -2.14800500 |
| H | 1.90590600  | -1.61994900 | -1.97189100 |
| C | 3.05673800  | -2.47433800 | -0.38961500 |
| C | 2.82944300  | -2.55726500 | 0.98622900  |
| C | 4.37485000  | -2.28983200 | -0.82834500 |
| C | 3.88442100  | -2.46104500 | 1.89453700  |
| H | 1.81916800  | -2.70435500 | 1.35640400  |
| C | 5.43024800  | -2.19260400 | 0.07233800  |
| H | 4.57004600  | -2.23357800 | -1.89776900 |

|   |             |             |             |
|---|-------------|-------------|-------------|
| C | 5.18745900  | -2.27812800 | 1.44345500  |
| H | 3.68410200  | -2.53327600 | 2.95969700  |
| H | 6.44337900  | -2.05526200 | -0.29405400 |
| H | 6.00811500  | -2.20713600 | 2.15050200  |
| F | -2.18274200 | -3.26937800 | -0.34598900 |
| H | -3.23058500 | 1.31240100  | -2.35747100 |
| F | -4.28165700 | 1.21610200  | -0.64370600 |

**2a'-conformer-2**

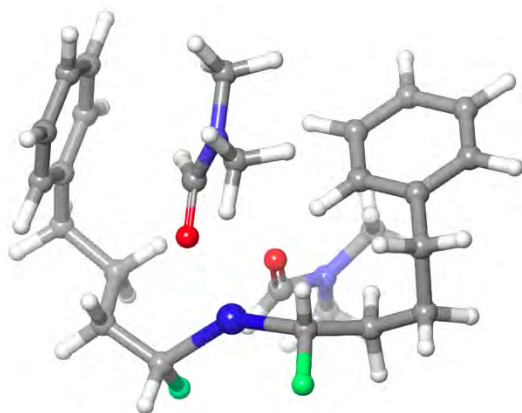

|    |             |             |             |
|----|-------------|-------------|-------------|
| Zn | 0.01728100  | -1.47721000 | -1.22431500 |
| O  | -0.43412400 | -1.07633900 | 0.86594000  |
| C  | -0.41893500 | -2.12936200 | 1.52247600  |
| N  | -1.14330800 | -2.32786700 | 2.62779900  |
| H  | 0.20654900  | -2.97941400 | 1.21342600  |
| O  | 1.01558800  | 0.42034200  | -1.31474100 |

|   |             |             |             |
|---|-------------|-------------|-------------|
| C | 1.07350200  | 1.38488000  | -0.54609900 |
| N | 0.55905300  | 2.59034900  | -0.81782500 |
| H | 1.56794400  | 1.31666600  | 0.43504600  |
| C | -2.06187600 | -1.31309900 | 3.11443500  |
| H | -1.68919700 | -0.87326300 | 4.04627500  |
| H | -2.16348900 | -0.53361700 | 2.35908900  |
| H | -3.03777900 | -1.76973800 | 3.30527000  |
| C | -1.04738400 | -3.56508300 | 3.37738000  |
| H | -0.33686600 | -4.23475400 | 2.88931600  |
| H | -0.70537200 | -3.36595800 | 4.39853400  |
| H | -2.02479200 | -4.05597300 | 3.42408000  |
| C | -0.15779100 | 2.83144800  | -2.05722400 |
| H | 0.30855500  | 3.65918500  | -2.60137600 |
| H | -0.12509100 | 1.92571200  | -2.66211800 |
| H | -1.19977300 | 3.08945600  | -1.83416700 |
| C | 0.63083900  | 3.68815900  | 0.12417000  |
| H | 1.16451400  | 3.36606700  | 1.02039900  |
| H | 1.17004000  | 4.53231400  | -0.31960400 |
| H | -0.38037700 | 4.00748000  | 0.39915300  |
| C | -1.76858400 | -1.00020800 | -2.06139700 |
| C | -2.99735800 | -1.24611800 | -1.19062000 |
| H | -3.21560100 | -2.32132900 | -1.23014000 |
| H | -2.76242300 | -1.02320300 | -0.14264800 |
| C | -4.25520000 | -0.47038100 | -1.60107400 |
| H | -5.10121600 | -0.77122600 | -0.96899600 |

|   |             |             |             |
|---|-------------|-------------|-------------|
| H | -4.51139000 | -0.73353800 | -2.63394000 |
| C | -4.10341100 | 1.06289600  | -1.52066700 |
| H | -3.37104600 | 1.38801400  | -2.26825600 |
| H | -5.05617200 | 1.52846000  | -1.79702800 |
| C | -3.67950200 | 1.56857300  | -0.16112200 |
| C | -4.60785000 | 2.10861800  | 0.73258100  |
| C | -2.34320900 | 1.48479900  | 0.25084600  |
| C | -4.21980100 | 2.55765000  | 1.99356000  |
| H | -5.65063900 | 2.18084400  | 0.43218800  |
| C | -1.94984100 | 1.92628700  | 1.51113400  |
| H | -1.60524600 | 1.03840600  | -0.41088300 |
| C | -2.88727600 | 2.46970000  | 2.38870300  |
| H | -4.96014700 | 2.97834000  | 2.66770700  |
| H | -0.90958400 | 1.81762600  | 1.81139300  |
| H | -2.58353300 | 2.81620700  | 3.37213000  |
| C | 1.54775500  | -2.82070100 | -1.18763500 |
| H | 1.64288400  | -3.32830700 | -2.15651800 |
| C | 2.90132600  | -2.22106100 | -0.84050700 |
| H | 3.72132000  | -2.93823000 | -1.00930100 |
| H | 3.06440200  | -1.37186800 | -1.51637100 |
| C | 2.97462500  | -1.75594300 | 0.61350000  |
| H | 2.86494400  | -2.63986900 | 1.25209400  |
| H | 2.11958900  | -1.10082300 | 0.83009000  |
| C | 4.28365300  | -1.02658100 | 0.97536500  |
| H | 4.48864500  | -1.14179300 | 2.04549400  |

|   |             |             |             |
|---|-------------|-------------|-------------|
| H | 5.11737200  | -1.50125900 | 0.44264800  |
| C | 4.23720200  | 0.44774500  | 0.65444300  |
| C | 3.98996000  | 1.38053500  | 1.66799300  |
| C | 4.38617700  | 0.92081600  | -0.65353800 |
| C | 3.89179700  | 2.74187800  | 1.38811800  |
| H | 3.88252100  | 1.03124500  | 2.69238100  |
| C | 4.27173300  | 2.27867500  | -0.94259700 |
| H | 4.59885000  | 0.21808500  | -1.45380900 |
| C | 4.02566300  | 3.19548600  | 0.07737700  |
| H | 3.71689100  | 3.44887100  | 2.19476700  |
| H | 4.38649200  | 2.62171900  | -1.96648600 |
| H | 3.95347200  | 4.25616600  | -0.14532300 |
| F | 1.33028200  | -3.89108300 | -0.24800600 |
| H | -1.73531600 | 0.07092700  | -2.32709800 |
| F | -2.02223600 | -1.65095800 | -3.29810300 |

**2a'-conformer-3**

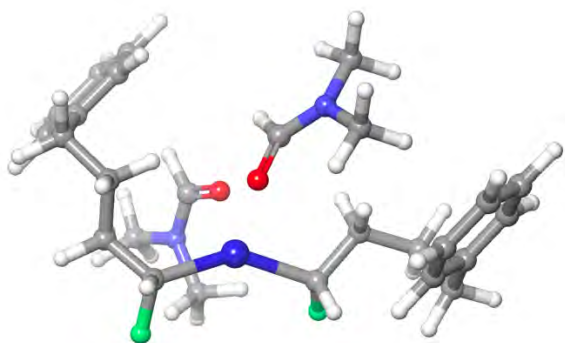

|    |             |             |             |
|----|-------------|-------------|-------------|
| Zn | 0.07731400  | 1.00478300  | 0.78015100  |
| O  | 1.30847600  | 0.18990000  | -0.79665100 |
| C  | 2.40418900  | 0.57562100  | -1.23169500 |
| N  | 2.79991400  | 1.84503100  | -1.29885600 |
| H  | 3.13458700  | -0.14910400 | -1.61779800 |
| O  | -0.64724300 | -1.01531900 | 1.02212000  |
| C  | -0.69480200 | -1.77890700 | 0.05197700  |
| N  | -1.73228600 | -2.57484200 | -0.22988100 |
| H  | 0.14074700  | -1.84058800 | -0.65961700 |
| C  | 1.94725200  | 2.92726800  | -0.81429100 |
| H  | 2.24693700  | 3.84641900  | -1.32325700 |
| H  | 0.90260800  | 2.72645500  | -1.06157200 |
| H  | 2.05940600  | 3.06028100  | 0.26750700  |
| C  | 4.15974300  | 2.18032300  | -1.67566200 |
| H  | 4.66650400  | 1.28934100  | -2.04993100 |
| H  | 4.15072400  | 2.94749600  | -2.45547900 |

|   |             |             |             |
|---|-------------|-------------|-------------|
| H | 4.71095500  | 2.56218900  | -0.80865400 |
| C | -2.96072400 | -2.50262000 | 0.54526900  |
| H | -3.24243400 | -3.50249900 | 0.89064900  |
| H | -2.79682900 | -1.84657300 | 1.39886900  |
| H | -3.77023400 | -2.09477200 | -0.07195000 |
| C | -1.77023900 | -3.35346400 | -1.45021400 |
| H | -0.79911000 | -3.30779400 | -1.94722400 |
| H | -2.00600800 | -4.39847800 | -1.22595300 |
| H | -2.53534400 | -2.95669600 | -2.12750600 |
| C | -1.53540400 | 1.75049500  | -0.22195300 |
| C | -2.17829600 | 0.73883700  | -1.15931100 |
| H | -1.40712300 | 0.29429300  | -1.80826900 |
| H | -2.57728600 | -0.07663700 | -0.54225900 |
| C | -3.30289100 | 1.28945300  | -2.04233100 |
| H | -3.61669500 | 0.52047800  | -2.76190900 |
| H | -2.91787100 | 2.13536900  | -2.62053500 |
| C | -4.53438800 | 1.75157600  | -1.24621900 |
| H | -4.24953900 | 2.57435800  | -0.58246100 |
| H | -5.28004300 | 2.15170200  | -1.94352700 |
| C | -5.15682600 | 0.63799800  | -0.43676200 |
| C | -4.98705100 | 0.55961900  | 0.94810000  |
| C | -5.90230700 | -0.36453800 | -1.06812900 |
| C | -5.55420500 | -0.47934300 | 1.68438500  |
| H | -4.40775200 | 1.32785000  | 1.45480300  |
| C | -6.47248900 | -1.40453900 | -0.33868500 |

|   |             |             |             |
|---|-------------|-------------|-------------|
| H | -6.04859800 | -0.31576100 | -2.14532600 |
| C | -6.30097500 | -1.46494100 | 1.04393100  |
| H | -5.41506000 | -0.51460200 | 2.76106500  |
| H | -7.05927000 | -2.16386600 | -0.84779900 |
| H | -6.75097800 | -2.27040000 | 1.61646600  |
| C | 1.42907300  | 1.35893600  | 2.25842200  |
| H | 1.01758900  | 1.11843100  | 3.25082400  |
| C | 2.75977900  | 0.63124200  | 2.14007300  |
| H | 3.24645200  | 0.88079800  | 1.18403500  |
| H | 3.45298600  | 0.96678100  | 2.92848800  |
| C | 2.57221000  | -0.87964400 | 2.24070800  |
| H | 1.83984400  | -1.20784000 | 1.49247000  |
| H | 2.14020800  | -1.11991000 | 3.22048600  |
| C | 3.87201900  | -1.67732400 | 2.05961800  |
| H | 4.64947200  | -1.26353800 | 2.71298800  |
| H | 3.70766400  | -2.71330700 | 2.37895600  |
| C | 4.36321600  | -1.68846300 | 0.63190300  |
| C | 5.41830900  | -0.87603200 | 0.21009100  |
| C | 3.75812400  | -2.52887000 | -0.31050600 |
| C | 5.87606500  | -0.92028100 | -1.10680700 |
| H | 5.89750500  | -0.21576700 | 0.92916200  |
| C | 4.20418200  | -2.57237900 | -1.62784400 |
| H | 2.93484400  | -3.16655900 | 0.00489400  |
| C | 5.27132500  | -1.76865500 | -2.03130700 |
| H | 6.71247300  | -0.29518100 | -1.40776100 |



|   |             |             |             |
|---|-------------|-------------|-------------|
| H | 3.72857500  | -3.24088000 | -2.33956700 |
| H | 5.63229700  | -1.81123400 | -3.05440900 |
| F | 1.74475600  | 2.75132000  | 2.32588400  |
| H | -2.31358400 | 2.13215000  | 0.45553300  |
| F | -1.18593700 | 2.87733900  | -1.03345200 |

**2a'-conformer-4**

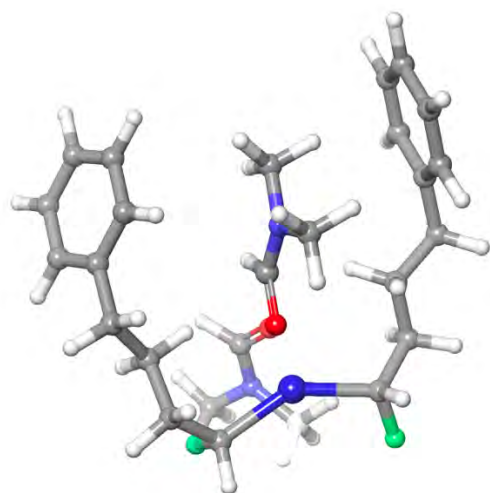

|    |             |             |             |
|----|-------------|-------------|-------------|
| Zn | 1.33231700  | -1.61645600 | -0.88450000 |
| O  | 1.10058900  | -0.83959500 | 1.13006300  |
| C  | 2.10353700  | -0.72859400 | 1.85118400  |
| N  | 2.95051600  | -1.70783400 | 2.15582200  |
| H  | 2.34145900  | 0.23302900  | 2.32888100  |
| O  | 0.00029200  | -0.11849000 | -1.64713400 |
| C  | -0.66342600 | 0.60916400  | -0.89730400 |

|   |             |             |             |
|---|-------------|-------------|-------------|
| N | -1.84532900 | 1.13886900  | -1.21888600 |
| H | -0.31105500 | 0.86209800  | 0.11286400  |
| C | 4.23472400  | -1.39746600 | 2.75610400  |
| H | 5.01095400  | -1.42582600 | 1.98498200  |
| H | 4.20609700  | -0.39840400 | 3.19582500  |
| H | 4.46368000  | -2.12483000 | 3.53950400  |
| C | 2.84785900  | -3.00836300 | 1.50925800  |
| H | 1.81665500  | -3.22677400 | 1.23698700  |
| H | 3.47039800  | -3.01479700 | 0.60848100  |
| H | 3.20131200  | -3.77456400 | 2.20398300  |
| C | -2.47185000 | 0.85274900  | -2.49659500 |
| H | -2.60375400 | 1.77950700  | -3.06525000 |
| H | -1.83324100 | 0.16731100  | -3.05207500 |
| H | -3.45232200 | 0.39748900  | -2.32320400 |
| C | -2.59407400 | 1.95102700  | -0.27872500 |
| H | -2.00955800 | 2.08666700  | 0.63391200  |
| H | -2.79643700 | 2.93653700  | -0.71452500 |
| H | -3.54329100 | 1.46417000  | -0.03554100 |
| C | 0.18372200  | -3.29065900 | -0.83042700 |
| C | -0.91482000 | -3.35707800 | 0.22252800  |
| H | -1.44732200 | -4.31962100 | 0.15523200  |
| H | -0.46899600 | -3.32411200 | 1.22716400  |
| C | -1.91138200 | -2.20451600 | 0.10338300  |
| H | -2.13849500 | -2.00476700 | -0.95541900 |
| H | -1.45687900 | -1.29019500 | 0.50400800  |

|   |             |             |             |
|---|-------------|-------------|-------------|
| C | -3.21731700 | -2.47416400 | 0.86012000  |
| H | -3.68287000 | -3.37988000 | 0.45166300  |
| H | -2.98493600 | -2.68823200 | 1.91034900  |
| C | -4.19780200 | -1.32947800 | 0.78154000  |
| C | -4.91237200 | -1.09012100 | -0.39827800 |
| C | -4.41932100 | -0.48178100 | 1.86960800  |
| C | -5.83169500 | -0.04761100 | -0.48339300 |
| H | -4.75784300 | -1.74720000 | -1.25212600 |
| C | -5.34045100 | 0.56214500  | 1.79266900  |
| H | -3.87353500 | -0.65399400 | 2.79413700  |
| C | -6.05301000 | 0.78114800  | 0.61648800  |
| H | -6.38672400 | 0.11003300  | -1.40389900 |
| H | -5.50607000 | 1.20003800  | 2.65591900  |
| H | -6.77764000 | 1.58733000  | 0.55682800  |
| C | 3.19504100  | -0.91862400 | -1.36857100 |
| H | 3.73101000  | -1.56416200 | -2.07785900 |
| C | 3.17038000  | 0.49469400  | -1.93094200 |
| H | 4.15734800  | 0.80958200  | -2.30492100 |
| H | 2.48472000  | 0.50001500  | -2.78997200 |
| C | 2.68760300  | 1.50780500  | -0.89272500 |
| H | 3.48489400  | 1.69077500  | -0.16160200 |
| H | 1.85785400  | 1.07015300  | -0.32708300 |
| C | 2.22116000  | 2.83564500  | -1.49937600 |
| H | 3.06780500  | 3.33723600  | -1.98566800 |
| H | 1.48421500  | 2.62420100  | -2.28476300 |

|   |             |             |             |
|---|-------------|-------------|-------------|
| C | 1.60023900  | 3.74042500  | -0.46376000 |
| C | 0.22222700  | 3.96834000  | -0.44081800 |
| C | 2.38407600  | 4.32937200  | 0.53385200  |
| C | -0.36067700 | 4.75707900  | 0.54970100  |
| H | -0.39734700 | 3.52798400  | -1.22025900 |
| C | 1.80869400  | 5.11856800  | 1.52441200  |
| H | 3.45968700  | 4.16740800  | 0.52692700  |
| C | 0.43149500  | 5.33357400  | 1.53790400  |
| H | -1.43392700 | 4.92828600  | 0.54410200  |
| H | 2.43596800  | 5.57117200  | 2.28676300  |
| H | -0.01796000 | 5.95157600  | 2.30895800  |
| F | 4.06040900  | -0.86045800 | -0.21713000 |
| H | -0.28778800 | -3.50576900 | -1.80204000 |
| F | 1.02466800  | -4.41710100 | -0.56790000 |

**2a'-conformer-5**

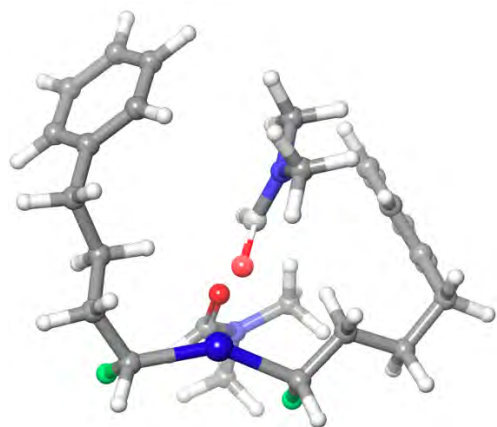

|    |             |             |             |
|----|-------------|-------------|-------------|
| Zn | 0.04154200  | -2.21928900 | -0.90674300 |
| O  | -0.10152900 | -0.89511000 | 0.83133200  |
| C  | -0.46197500 | -1.61189800 | 1.77809600  |
| N  | -1.46019300 | -1.30521100 | 2.60594100  |
| H  | 0.05713500  | -2.55667200 | 1.98978300  |
| O  | 0.65303900  | -0.50819900 | -2.03930300 |
| C  | 0.63390900  | 0.62930600  | -1.55602900 |
| N  | 0.73649100  | 1.74876700  | -2.28602500 |
| H  | 0.52761700  | 0.79234600  | -0.47481500 |
| C  | -1.98344200 | -2.30824500 | 3.51262300  |
| H  | -2.90216400 | -2.74122300 | 3.10086900  |
| H  | -1.24684900 | -3.10281900 | 3.64539300  |
| H  | -2.19963500 | -1.85758200 | 4.48535500  |
| C  | -2.33686600 | -0.18886200 | 2.29288100  |
| H  | -1.78553100 | 0.56172300  | 1.72554900  |

|   |             |             |             |
|---|-------------|-------------|-------------|
| H | -3.17725100 | -0.54486500 | 1.68694900  |
| H | -2.70889400 | 0.25398300  | 3.22044200  |
| C | 0.85732500  | 1.69083700  | -3.73143800 |
| H | 1.83088300  | 2.08327900  | -4.04463500 |
| H | 0.76240100  | 0.65270500  | -4.04588700 |
| H | 0.06835100  | 2.29286400  | -4.19342800 |
| C | 0.77590800  | 3.05588300  | -1.66286100 |
| H | 0.77734300  | 2.94291700  | -0.57649300 |
| H | 1.68987700  | 3.58350500  | -1.95843400 |
| H | -0.08922900 | 3.65644900  | -1.96738400 |
| C | -1.98474500 | -2.17111100 | -1.10711200 |
| C | -2.46298600 | -0.76312000 | -1.41723700 |
| H | -1.97171600 | -0.06870500 | -0.72014200 |
| H | -2.10658700 | -0.49295400 | -2.42345000 |
| C | -3.97428800 | -0.55481100 | -1.33934800 |
| H | -4.33794700 | -0.92122400 | -0.37151100 |
| H | -4.46683500 | -1.16315600 | -2.10863100 |
| C | -4.38518200 | 0.91644700  | -1.52106800 |
| H | -3.99646800 | 1.28081600  | -2.48054700 |
| H | -5.47773400 | 0.99078800  | -1.57158400 |
| C | -3.87984900 | 1.80007100  | -0.40545400 |
| C | -4.59427600 | 1.90322500  | 0.79150300  |
| C | -2.67444600 | 2.50064700  | -0.51628000 |
| C | -4.12461600 | 2.68275000  | 1.84577100  |
| H | -5.53434800 | 1.36489700  | 0.89313800  |

|   |             |             |             |
|---|-------------|-------------|-------------|
| C | -2.19989900 | 3.28407900  | 0.53340100  |
| H | -2.10435900 | 2.42084900  | -1.44105400 |
| C | -2.92394700 | 3.37771900  | 1.71980600  |
| H | -4.70021700 | 2.75328200  | 2.76423200  |
| H | -1.26841800 | 3.83271900  | 0.42546300  |
| H | -2.55729000 | 3.99081900  | 2.53715500  |
| C | 1.67794000  | -3.33684600 | -0.45504500 |
| H | 1.70946700  | -4.31531900 | -0.95184200 |
| C | 3.00916200  | -2.64233900 | -0.69531200 |
| H | 3.85872100  | -3.30130600 | -0.45401300 |
| H | 3.07653900  | -2.41551500 | -1.76963700 |
| C | 3.14212100  | -1.34852400 | 0.10420300  |
| H | 3.21686500  | -1.58464000 | 1.17250400  |
| H | 2.22325400  | -0.76406000 | -0.00375100 |
| C | 4.33209700  | -0.48218900 | -0.32384000 |
| H | 5.27139700  | -1.01106600 | -0.11922600 |
| H | 4.28574100  | -0.32533800 | -1.40928500 |
| C | 4.32263100  | 0.85325800  | 0.37627900  |
| C | 4.78916500  | 0.97682500  | 1.68789600  |
| C | 3.78635200  | 1.98492800  | -0.24419400 |
| C | 4.72577500  | 2.19351600  | 2.35997500  |
| H | 5.20779300  | 0.10407100  | 2.18386000  |
| C | 3.72290100  | 3.20693300  | 0.42252600  |
| H | 3.42906400  | 1.90263500  | -1.27026900 |
| C | 4.19188300  | 3.31493500  | 1.72883300  |

|   |             |             |             |
|---|-------------|-------------|-------------|
| H | 5.09755100  | 2.26863000  | 3.37755500  |
| H | 3.31875500  | 4.08147000  | -0.08095700 |
| H | 4.14780900  | 4.26672200  | 2.24908800  |
| F | 1.63578000  | -3.64087300 | 0.94832900  |
| H | -2.48632000 | -2.87393400 | -1.78553500 |
| F | -2.51523800 | -2.48327300 | 0.19837800  |

**2a'-conformer-6**

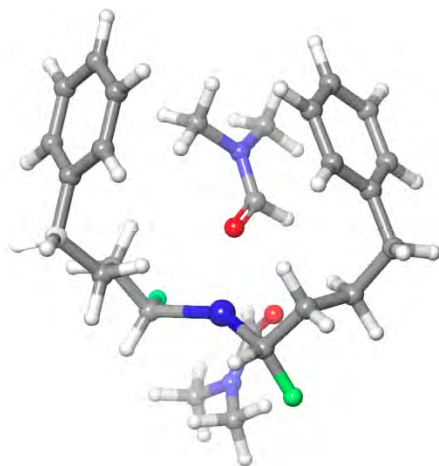

|    |             |             |             |
|----|-------------|-------------|-------------|
| Zn | -1.63117800 | -0.46688300 | -0.56195500 |
| O  | -2.63764500 | 0.47955400  | 1.10620700  |
| C  | -3.29364900 | -0.33813900 | 1.76563500  |
| N  | -4.26818900 | -1.11001000 | 1.28206700  |
| H  | -3.12232300 | -0.46179600 | 2.84268400  |
| O  | 0.22726400  | 0.33249100  | 0.06753200  |
| C  | 0.36773900  | 0.82808300  | 1.19341300  |



|   |             |             |             |
|---|-------------|-------------|-------------|
| N | 1.47266800  | 0.70852600  | 1.93036800  |
| H | -0.44284900 | 1.39589100  | 1.67008700  |
| C | -4.72168900 | -2.25882100 | 2.04040100  |
| H | -4.25561600 | -3.16916300 | 1.64824000  |
| H | -4.43113600 | -2.14733400 | 3.08676000  |
| H | -5.80990500 | -2.34323500 | 1.97599600  |
| C | -4.65497600 | -1.05518200 | -0.11993400 |
| H | -4.29144900 | -0.13705100 | -0.58410800 |
| H | -4.24978800 | -1.91804700 | -0.66090800 |
| H | -5.74716500 | -1.08134200 | -0.18345500 |
| C | 2.61884000  | -0.04423100 | 1.45394700  |
| H | 2.82339200  | -0.88090400 | 2.12987800  |
| H | 2.40724200  | -0.42819000 | 0.45554700  |
| H | 3.49788900  | 0.60777700  | 1.41423200  |
| C | 1.56615100  | 1.28563100  | 3.25323900  |
| H | 0.67184800  | 1.87653700  | 3.46183500  |
| H | 1.66322500  | 0.49600500  | 4.00654700  |
| H | 2.43915700  | 1.94358900  | 3.31102800  |
| C | -2.09197200 | 0.54964100  | -2.25434600 |
| C | -1.29990000 | 1.84197100  | -2.36973300 |
| H | -0.23575400 | 1.57843200  | -2.29833500 |
| H | -1.44895400 | 2.33001700  | -3.34718600 |
| C | -1.66539800 | 2.84869500  | -1.27994100 |
| H | -1.63978900 | 2.35869100  | -0.29761400 |
| H | -2.70324300 | 3.15798000  | -1.44025700 |

|   |             |             |             |
|---|-------------|-------------|-------------|
| C | -0.75705500 | 4.09159800  | -1.25414000 |
| H | -0.54575800 | 4.40326600  | -2.28516400 |
| H | -1.28690200 | 4.92387600  | -0.77747400 |
| C | 0.53984200  | 3.86710100  | -0.51301800 |
| C | 1.63185700  | 3.22825100  | -1.10947300 |
| C | 0.66847300  | 4.28442200  | 0.81644100  |
| C | 2.81198200  | 3.01271700  | -0.40196700 |
| H | 1.55996000  | 2.90758600  | -2.14493200 |
| C | 1.85446300  | 4.09547500  | 1.52137000  |
| H | -0.16956800 | 4.78717600  | 1.29420800  |
| C | 2.93272600  | 3.45668400  | 0.91303300  |
| H | 3.64508300  | 2.50952600  | -0.88493500 |
| H | 1.93935200  | 4.45679400  | 2.54301000  |
| H | 3.86380600  | 3.31447500  | 1.45580100  |
| C | -1.43774700 | -2.34681800 | 0.23012000  |
| H | -2.12328200 | -3.10451700 | -0.18634500 |
| C | -0.01941300 | -2.87144500 | 0.05837400  |
| H | 0.67139700  | -2.24898500 | 0.64325600  |
| H | 0.08203700  | -3.90064400 | 0.44067300  |
| C | 0.38476100  | -2.82554200 | -1.41493800 |
| H | 0.47633300  | -1.77668100 | -1.73297300 |
| H | -0.41504500 | -3.26884900 | -2.02449800 |
| C | 1.69754000  | -3.55756800 | -1.72951100 |
| H | 1.61827000  | -4.59736100 | -1.38999100 |
| H | 1.83909700  | -3.58750900 | -2.81613000 |

|   |             |             |             |
|---|-------------|-------------|-------------|
| C | 2.90554500  | -2.91119800 | -1.09567700 |
| C | 3.42310500  | -3.37038000 | 0.11795600  |
| C | 3.52837800  | -1.82105300 | -1.71300100 |
| C | 4.53994900  | -2.76844700 | 0.69403400  |
| H | 2.94785600  | -4.21591700 | 0.60973400  |
| C | 4.64400100  | -1.21488800 | -1.14225900 |
| H | 3.13544800  | -1.45232100 | -2.65795700 |
| C | 5.15648300  | -1.68979100 | 0.06400700  |
| H | 4.93328200  | -3.14748600 | 1.63305900  |
| H | 5.11947400  | -0.37666900 | -1.64362100 |
| H | 6.03326400  | -1.22599400 | 0.50622000  |
| F | -1.71456800 | -2.36358200 | 1.64113400  |
| H | -1.91926900 | -0.03513400 | -3.16950200 |
| F | -3.47685600 | 0.90552100  | -2.30401300 |

**2a'-conformer-7**

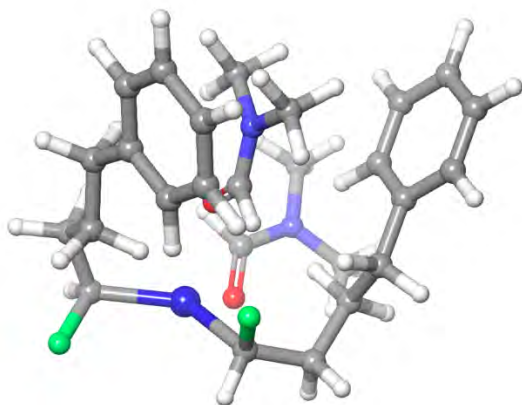

|    |             |             |             |
|----|-------------|-------------|-------------|
| Zn | -0.37633800 | -2.43232100 | -0.45156300 |
| O  | -0.24597200 | -0.68382000 | 0.91015700  |
| C  | 0.32862900  | 0.30939600  | 0.42504100  |
| N  | 0.67860500  | 1.38889600  | 1.11956900  |
| H  | 0.59774800  | 0.33891900  | -0.63725000 |
| O  | -2.46049400 | -2.44169800 | 0.09866200  |
| C  | -2.70838500 | -1.85317200 | 1.15514600  |
| N  | -3.75845300 | -1.04237100 | 1.33719700  |
| H  | -2.06118400 | -1.95136600 | 2.03660600  |
| C  | 1.22247600  | 2.56464400  | 0.46263400  |
| H  | 2.21553800  | 2.79351200  | 0.86355000  |
| H  | 1.31645000  | 2.37134900  | -0.60745400 |
| H  | 0.54405500  | 3.41262600  | 0.61607500  |
| C  | 0.43869500  | 1.47953600  | 2.54371100  |
| H  | 0.07837000  | 0.51487900  | 2.90082400  |

|   |             |             |             |
|---|-------------|-------------|-------------|
| H | 1.37327100  | 1.73783600  | 3.05331300  |
| H | -0.30615300 | 2.25793400  | 2.74715400  |
| C | -4.70947000 | -0.79253300 | 0.26739400  |
| H | -4.69085300 | 0.26869600  | -0.00507100 |
| H | -4.42758200 | -1.39623600 | -0.59445600 |
| H | -5.71757400 | -1.06169800 | 0.59857400  |
| C | -3.96791100 | -0.33982100 | 2.58656900  |
| H | -3.15248800 | -0.56568200 | 3.27675000  |
| H | -3.99103200 | 0.74070400  | 2.40496000  |
| H | -4.91736900 | -0.63859300 | 3.04307200  |
| C | 0.75391200  | -3.78220000 | 0.56650000  |
| C | 1.80541500  | -3.03887200 | 1.37761500  |
| H | 1.28030100  | -2.48538000 | 2.17024200  |
| H | 2.50049500  | -3.73199400 | 1.87596000  |
| C | 2.60367700  | -2.04949300 | 0.52135200  |
| H | 1.92333800  | -1.60977500 | -0.21884500 |
| H | 3.35928000  | -2.58284700 | -0.06612900 |
| C | 3.24566000  | -0.93759900 | 1.34502000  |
| H | 2.49020900  | -0.55238700 | 2.04784200  |
| H | 4.04146200  | -1.35591600 | 1.97555400  |
| C | 3.79938600  | 0.24311600  | 0.57160400  |
| C | 4.53856100  | 1.21487700  | 1.25933800  |
| C | 3.57129200  | 0.43329900  | -0.79432500 |
| C | 5.03112700  | 2.34274600  | 0.61198000  |
| H | 4.73121300  | 1.07502500  | 2.32150700  |

|   |             |             |             |
|---|-------------|-------------|-------------|
| C | 4.06454000  | 1.56475600  | -1.44692800 |
| H | 2.99796900  | -0.29198800 | -1.36461400 |
| C | 4.79174200  | 2.52384800  | -0.75031800 |
| H | 5.60552000  | 3.07852000  | 1.16762300  |
| H | 3.87608200  | 1.68964300  | -2.50937100 |
| H | 5.17633100  | 3.40070700  | -1.26215800 |
| C | -0.34950600 | -1.60344700 | -2.32821300 |
| H | -0.05218400 | -2.36272100 | -3.06341600 |
| C | -1.61645200 | -0.94659200 | -2.85497100 |
| H | -1.46660900 | -0.54668900 | -3.87115300 |
| H | -2.36028100 | -1.75036400 | -2.93921900 |
| C | -2.18650700 | 0.15828500  | -1.95737300 |
| H | -2.09104400 | -0.18381600 | -0.92085900 |
| H | -3.25999500 | 0.29430200  | -2.14506200 |
| C | -1.49490300 | 1.51055500  | -2.14312600 |
| H | -0.41020200 | 1.35235800  | -2.18664000 |
| H | -1.76040500 | 1.91115900  | -3.12984900 |
| C | -1.80885800 | 2.56286400  | -1.09772800 |
| C | -1.64206100 | 3.91542400  | -1.41943100 |
| C | -2.21271900 | 2.24907900  | 0.20560400  |
| C | -1.85650100 | 4.91982100  | -0.48141200 |
| H | -1.33401300 | 4.17965600  | -2.42852100 |
| C | -2.43134700 | 3.25296500  | 1.14990400  |
| H | -2.33712300 | 1.20920400  | 0.50181400  |
| C | -2.25229200 | 4.59186600  | 0.81398900  |

|   |             |             |             |
|---|-------------|-------------|-------------|
| H | -1.71849900 | 5.95966800  | -0.76218400 |
| H | -2.74491300 | 2.98603600  | 2.15640300  |
| H | -2.42587300 | 5.37104700  | 1.54962600  |
| F | 0.71520100  | -0.62123200 | -2.41148100 |
| H | 0.24504700  | -4.49832900 | 1.22742200  |
| F | 1.46527900  | -4.57765800 | -0.37530700 |

**2a'-conformer-8**

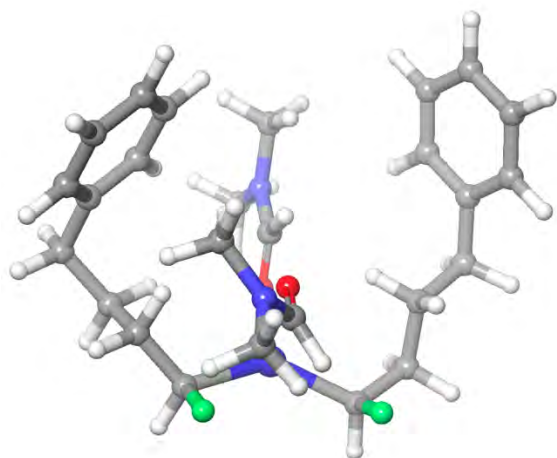

|    |             |             |             |
|----|-------------|-------------|-------------|
| Zn | 0.35480300  | -2.00581600 | 1.03231600  |
| O  | 0.21095900  | -0.83768100 | -0.80813800 |
| C  | 0.58662800  | -1.62652100 | -1.69117200 |
| N  | 1.41560900  | -1.29866500 | -2.68366000 |
| H  | 0.22533200  | -2.66200600 | -1.70556800 |
| O  | -0.23087600 | -0.25262100 | 2.08012200  |

|   |             |             |             |
|---|-------------|-------------|-------------|
| C | -0.51898700 | 0.80808200  | 1.51340500  |
| N | -0.79786000 | 1.94290900  | 2.16892100  |
| H | -0.56047500 | 0.88127400  | 0.41840800  |
| C | 1.99661900  | -2.33547400 | -3.51330100 |
| H | 3.03223500  | -2.51976200 | -3.20805300 |
| H | 1.42934400  | -3.25981100 | -3.39270100 |
| H | 1.97323900  | -2.03389300 | -4.56463800 |
| C | 2.02072400  | 0.01929600  | -2.75095700 |
| H | 1.53804100  | 0.67324500  | -2.02408500 |
| H | 3.08927700  | -0.04348500 | -2.51657100 |
| H | 1.89961500  | 0.43203400  | -3.75784400 |
| C | -0.72911800 | 2.00633000  | 3.61798100  |
| H | -1.69842900 | 2.31109800  | 4.02523000  |
| H | -0.46342700 | 1.02072000  | 3.99664400  |
| H | 0.02813100  | 2.73682800  | 3.92305800  |
| C | -1.12585000 | 3.16406100  | 1.46200300  |
| H | -1.22075300 | 2.95532700  | 0.39414200  |
| H | -2.08050300 | 3.56062500  | 1.82500700  |
| H | -0.34824100 | 3.92121900  | 1.62034500  |
| C | 2.38297800  | -2.17662000 | 0.86858300  |
| C | 3.17265700  | -0.90503000 | 0.61950500  |
| H | 4.19692600  | -1.14220000 | 0.28234100  |
| H | 2.69748300  | -0.35002900 | -0.19856400 |
| C | 3.23850900  | 0.00460900  | 1.84145900  |
| H | 3.67959400  | -0.53315700 | 2.69070000  |



|   |             |             |             |
|---|-------------|-------------|-------------|
| H | 2.21969400  | 0.27766300  | 2.14611200  |
| C | 4.05664300  | 1.28063400  | 1.58336000  |
| H | 4.03887200  | 1.91454200  | 2.47862800  |
| H | 5.10423600  | 1.00960000  | 1.40756900  |
| C | 3.54569400  | 2.06580700  | 0.39782700  |
| C | 2.29612900  | 2.69483300  | 0.44521400  |
| C | 4.28200300  | 2.15220600  | -0.78480800 |
| C | 1.80189900  | 3.39106600  | -0.65405500 |
| H | 1.71224200  | 2.63770500  | 1.36330000  |
| C | 3.79373600  | 2.84945600  | -1.88910000 |
| H | 5.25207200  | 1.66393700  | -0.83928200 |
| C | 2.55016000  | 3.47073700  | -1.82830700 |
| H | 0.83648000  | 3.88599300  | -0.59787300 |
| H | 4.38760900  | 2.90695700  | -2.79683300 |
| H | 2.16688600  | 4.01742000  | -2.68431300 |
| C | -1.22031400 | -3.28824600 | 0.85925500  |
| H | -1.12072200 | -4.19264600 | 1.47404300  |
| C | -2.61473100 | -2.72636400 | 1.07729900  |
| H | -3.38448100 | -3.49775200 | 0.91143400  |
| H | -2.69450400 | -2.41635600 | 2.12985100  |
| C | -2.90870800 | -1.53303300 | 0.17434100  |
| H | -2.84798300 | -1.84696400 | -0.87465500 |
| H | -2.11965700 | -0.78471800 | 0.30352300  |
| C | -4.26600200 | -0.87377900 | 0.44386800  |
| H | -5.07450800 | -1.57223400 | 0.19632800  |

|   |             |             |             |
|---|-------------|-------------|-------------|
| H | -4.35185900 | -0.65678400 | 1.51649000  |
| C | -4.42277700 | 0.40378400  | -0.34124600 |
| C | -3.99989600 | 1.62372800  | 0.19515900  |
| C | -4.92793900 | 0.39370900  | -1.64348400 |
| C | -4.08929300 | 2.80153600  | -0.54276400 |
| H | -3.60818800 | 1.64282200  | 1.21198100  |
| C | -5.01544300 | 1.56686500  | -2.38789700 |
| H | -5.25722900 | -0.54863300 | -2.07504200 |
| C | -4.59772600 | 2.77672100  | -1.83926300 |
| H | -3.77448800 | 3.74471800  | -0.10324500 |
| H | -5.41536700 | 1.53744300  | -3.39711300 |
| H | -4.67333400 | 3.69403000  | -2.41489300 |
| F | -1.20190700 | -3.76837400 | -0.49708500 |
| H | 2.91311100  | -2.77990400 | 1.61761600  |
| F | 2.50626000  | -2.92585100 | -0.36081600 |

**2a'-conformer-9**

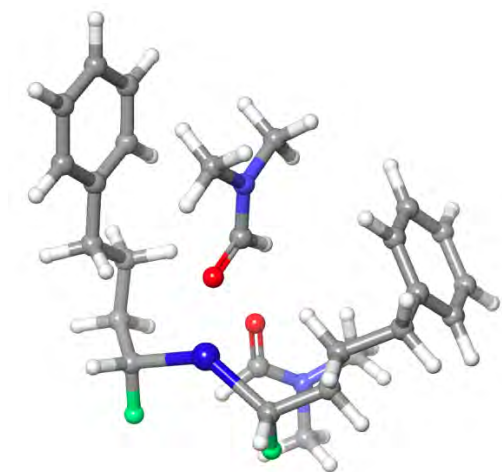

|    |             |             |             |
|----|-------------|-------------|-------------|
| Zn | -0.22471800 | -1.65539600 | -0.92146200 |
| O  | -0.99451000 | -0.96593400 | 1.04846100  |
| C  | -1.81915100 | -1.87356800 | 1.24937200  |
| N  | -3.04607100 | -1.68190500 | 1.73542500  |
| H  | -1.56550700 | -2.92270100 | 1.03596700  |
| O  | 0.94462500  | 0.08305500  | -1.10733000 |
| C  | 0.92067300  | 0.96911800  | -0.24026100 |
| N  | 1.70831800  | 2.04518600  | -0.26321800 |
| H  | 0.22636300  | 0.91476000  | 0.60975400  |
| C  | -3.55035800 | -0.34093900 | 1.97056100  |
| H  | -4.01694400 | -0.28931800 | 2.95942800  |
| H  | -2.72386500 | 0.36752200  | 1.91203300  |
| H  | -4.29413600 | -0.08037900 | 1.20883400  |
| C  | -4.02162500 | -2.75367800 | 1.67404400  |

|   |             |             |             |
|---|-------------|-------------|-------------|
| H | -3.50999900 | -3.70246900 | 1.50538100  |
| H | -4.58154900 | -2.80559700 | 2.61221900  |
| H | -4.70971700 | -2.57953300 | 0.84050100  |
| C | 1.67952300  | 3.02392700  | 0.80305200  |
| H | 1.39706300  | 4.00877900  | 0.41299300  |
| H | 0.95278700  | 2.71829100  | 1.55854300  |
| H | 2.67089500  | 3.09349700  | 1.26296300  |
| C | 2.69171200  | 2.23558300  | -1.31667100 |
| H | 2.66744200  | 1.36873300  | -1.97506800 |
| H | 2.45454100  | 3.14132100  | -1.88505200 |
| H | 3.68702200  | 2.33214300  | -0.87193200 |
| C | -2.03849300 | -1.44540800 | -1.83406400 |
| C | -2.74654400 | -0.11633400 | -1.63550900 |
| H | -3.81486100 | -0.20964000 | -1.89844300 |
| H | -2.71068600 | 0.15583800  | -0.57222200 |
| C | -2.12281400 | 1.01447400  | -2.44681900 |
| H | -2.11991100 | 0.75300800  | -3.51286200 |
| H | -1.07134400 | 1.13626300  | -2.15779600 |
| C | -2.86041800 | 2.35161400  | -2.26773800 |
| H | -2.35508900 | 3.12884900  | -2.85365000 |
| H | -3.87622600 | 2.25939100  | -2.66976500 |
| C | -2.93928800 | 2.77970200  | -0.82154000 |
| C | -4.13027200 | 2.66669400  | -0.10096500 |
| C | -1.80744300 | 3.26333700  | -0.15580500 |
| C | -4.19701600 | 3.02723400  | 1.24349600  |

|   |             |             |             |
|---|-------------|-------------|-------------|
| H | -5.01705900 | 2.28895600  | -0.60472000 |
| C | -1.86955500 | 3.63132100  | 1.18586400  |
| H | -0.87169400 | 3.36181800  | -0.70568200 |
| C | -3.06528400 | 3.51173600  | 1.89274400  |
| H | -5.13602700 | 2.93388100  | 1.78180200  |
| H | -0.99050200 | 4.03457100  | 1.68074900  |
| H | -3.11452200 | 3.80404000  | 2.93707000  |
| C | 0.87909700  | -3.22434200 | -0.24758700 |
| H | 1.61920800  | -3.60608400 | -0.96477800 |
| C | 1.55149500  | -3.08672600 | 1.11514000  |
| H | 0.76514400  | -3.06762800 | 1.88061100  |
| H | 2.17361100  | -3.96810200 | 1.33721000  |
| C | 2.38366000  | -1.81410800 | 1.27069800  |
| H | 2.90112700  | -1.83391300 | 2.23857400  |
| H | 1.69899900  | -0.95617000 | 1.29991700  |
| C | 3.40195100  | -1.61753700 | 0.15206200  |
| H | 4.04296100  | -2.50832200 | 0.08932500  |
| H | 2.87347000  | -1.55686500 | -0.80825300 |
| C | 4.29166100  | -0.39694600 | 0.27910700  |
| C | 5.26996300  | -0.16285600 | -0.69634400 |
| C | 4.19434600  | 0.51113200  | 1.33658000  |
| C | 6.13010700  | 0.92605700  | -0.61526500 |
| H | 5.35750900  | -0.85864000 | -1.52806800 |
| C | 5.05837500  | 1.60489900  | 1.42635000  |
| H | 3.44633100  | 0.36068900  | 2.10984000  |

|   |             |             |             |
|---|-------------|-------------|-------------|
| C | 6.03043400  | 1.81723700  | 0.45352200  |
| H | 6.88390700  | 1.07782100  | -1.38220700 |
| H | 4.97731500  | 2.28492200  | 2.27056300  |
| H | 6.70695300  | 2.66305100  | 0.52821600  |
| F | -0.05541900 | -4.30085100 | -0.08261600 |
| H | -2.11261200 | -1.72591000 | -2.89313100 |
| F | -2.86613000 | -2.40411300 | -1.14223600 |

**2a'-conformer-10**

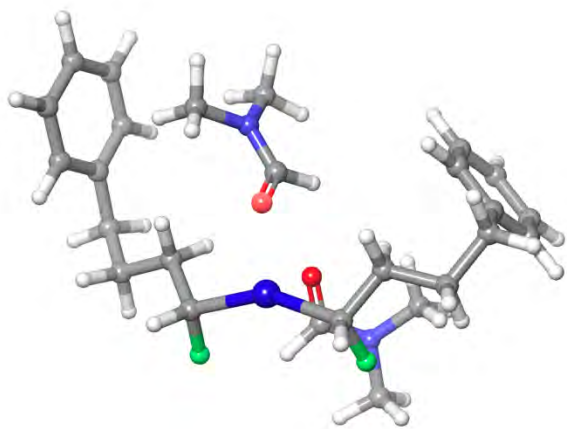

|    |             |             |             |
|----|-------------|-------------|-------------|
| Zn | -0.15895800 | -1.56297600 | -1.21420900 |
| O  | -0.74661800 | -0.79509100 | 0.78504500  |
| C  | -1.23413100 | -1.77153300 | 1.37464400  |
| N  | -2.41097900 | -1.75671400 | 2.00174900  |
| H  | -0.68577900 | -2.72271100 | 1.42421600  |
| O  | 0.55161300  | 0.39588300  | -1.65094900 |

|   |             |             |             |
|---|-------------|-------------|-------------|
| C | 0.62435000  | 1.22311900  | -0.73257400 |
| N | 1.63353800  | 2.08458600  | -0.58650200 |
| H | -0.15883600 | 1.29543500  | 0.03416200  |
| C | -3.02280100 | -3.00522700 | 2.41336200  |
| H | -3.76908400 | -3.31616600 | 1.67355100  |
| H | -2.25833400 | -3.78060000 | 2.49132800  |
| H | -3.50513000 | -2.88216200 | 3.38710700  |
| C | -3.30659700 | -0.62699400 | 1.81912700  |
| H | -2.72535900 | 0.27333400  | 1.61724400  |
| H | -3.96628100 | -0.82103400 | 0.96627700  |
| H | -3.90370600 | -0.48282400 | 2.72348700  |
| C | 2.78325900  | 2.04012800  | -1.47594700 |
| H | 3.63731900  | 1.58561900  | -0.96357700 |
| H | 2.52048500  | 1.44761400  | -2.35118100 |
| H | 3.04817300  | 3.05794500  | -1.77821300 |
| C | 1.70786700  | 2.97755400  | 0.55185400  |
| H | 0.81180900  | 2.86424500  | 1.16576900  |
| H | 2.59006200  | 2.73799700  | 1.15448900  |
| H | 1.78232400  | 4.01675700  | 0.21468900  |
| C | -2.09851600 | -1.61379100 | -1.80072100 |
| C | -2.65781500 | -0.20114300 | -1.82495500 |
| H | -2.37943300 | 0.29874400  | -0.88666100 |
| H | -2.14895900 | 0.35301600  | -2.62770800 |
| C | -4.17102700 | -0.10276800 | -2.01291400 |
| H | -4.66905600 | -0.73059900 | -1.26365300 |

|   |             |             |             |
|---|-------------|-------------|-------------|
| H | -4.44409400 | -0.51333600 | -2.99354200 |
| C | -4.69741600 | 1.33957500  | -1.90876900 |
| H | -4.19240100 | 1.95937500  | -2.66019800 |
| H | -5.76746500 | 1.35842800  | -2.14654300 |
| C | -4.48119800 | 1.93652600  | -0.53839400 |
| C | -5.39011000 | 1.68920500  | 0.49433500  |
| C | -3.35103100 | 2.70830000  | -0.25157400 |
| C | -5.17854700 | 2.19371900  | 1.77529800  |
| H | -6.27651000 | 1.09315500  | 0.28678900  |
| C | -3.13111000 | 3.21302800  | 1.02809900  |
| H | -2.63684500 | 2.91257900  | -1.04654800 |
| C | -4.04512800 | 2.95678400  | 2.04774500  |
| H | -5.90210800 | 1.99505000  | 2.56080400  |
| H | -2.24974700 | 3.81665600  | 1.22718100  |
| H | -3.87943500 | 3.35385200  | 3.04452500  |
| C | 1.53719700  | -2.46506400 | -0.57387000 |
| H | 2.11037100  | -3.05965700 | -1.29883800 |
| C | 2.48905000  | -1.48066400 | 0.08891500  |
| H | 2.82961100  | -0.76556200 | -0.67381700 |
| H | 1.93703600  | -0.89165700 | 0.83957300  |
| C | 3.69225100  | -2.14385500 | 0.76038300  |
| H | 4.33205900  | -2.59823600 | -0.00799300 |
| H | 3.32762800  | -2.96935100 | 1.37987300  |
| C | 4.51066400  | -1.19584400 | 1.64360200  |
| H | 3.88020700  | -0.85066100 | 2.47242300  |



|   |             |             |             |
|---|-------------|-------------|-------------|
| H | 5.33946100  | -1.75276000 | 2.10106400  |
| C | 5.08067500  | 0.01603400  | 0.93750400  |
| C | 4.99526200  | 1.28494300  | 1.51795200  |
| C | 5.74761200  | -0.10039300 | -0.28754700 |
| C | 5.56738000  | 2.40127400  | 0.90853400  |
| H | 4.48418600  | 1.39422200  | 2.47234700  |
| C | 6.31902400  | 1.01048500  | -0.90305000 |
| H | 5.82502600  | -1.07454300 | -0.76327500 |
| C | 6.23445100  | 2.26734100  | -0.30595100 |
| H | 5.49423600  | 3.37436600  | 1.38649500  |
| H | 6.83493200  | 0.89361400  | -1.85154800 |
| H | 6.68397600  | 3.13236900  | -0.78373200 |
| F | 1.16418100  | -3.40267400 | 0.45111300  |
| H | -2.38109900 | -2.12728800 | -2.72883200 |
| F | -2.82418800 | -2.30752800 | -0.76459000 |

**2a'-conformer-11**

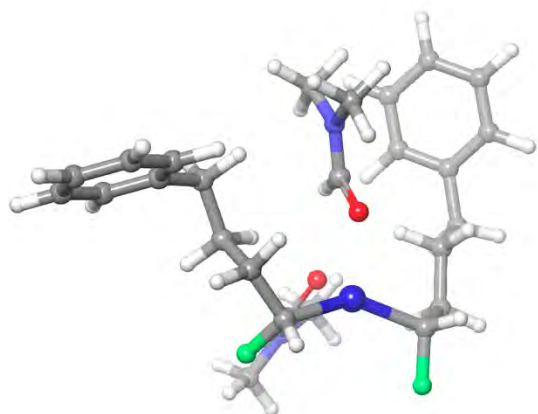

|    |             |             |             |
|----|-------------|-------------|-------------|
| Zn | -0.19388700 | -1.51546000 | -1.32726300 |
| O  | -0.81703700 | -1.40475600 | 0.78792300  |
| C  | -0.43093200 | -2.44682100 | 1.34218500  |
| N  | -1.09962800 | -3.05459000 | 2.32645300  |
| H  | 0.50880400  | -2.93050000 | 1.04071200  |
| O  | -0.08988300 | 0.62194000  | -1.40325200 |
| C  | -0.24002000 | 1.33732000  | -0.40804400 |
| N  | 0.03888400  | 2.64426600  | -0.37448800 |
| H  | -0.62151200 | 0.92908900  | 0.53896400  |
| C  | -0.60767200 | -4.27949600 | 2.92715900  |
| H  | -1.31996100 | -5.09418500 | 2.76162200  |
| H  | 0.34891200  | -4.54822400 | 2.47573600  |
| H  | -0.46933200 | -4.14458700 | 4.00486000  |
| C  | -2.38222400 | -2.55132100 | 2.78166000  |
| H  | -2.63633900 | -1.67146100 | 2.19095800  |

|   |             |             |             |
|---|-------------|-------------|-------------|
| H | -3.15162500 | -3.31796000 | 2.64419400  |
| H | -2.32982900 | -2.28654000 | 3.84286100  |
| C | -0.13329000 | 3.42526800  | 0.83317300  |
| H | -0.85786100 | 4.22929000  | 0.66757700  |
| H | -0.50773500 | 2.78189000  | 1.63177800  |
| H | 0.82588300  | 3.85694500  | 1.13996800  |
| C | 0.57606600  | 3.32153200  | -1.54024600 |
| H | 0.65099900  | 2.60288400  | -2.35510400 |
| H | -0.08446800 | 4.14442100  | -1.83085900 |
| H | 1.56844000  | 3.72607600  | -1.31078100 |
| C | -1.95470500 | -2.15053200 | -2.11402500 |
| C | -3.18573600 | -1.85170600 | -1.26718300 |
| H | -4.10317700 | -2.22322200 | -1.75069600 |
| H | -3.10141100 | -2.38621800 | -0.30893700 |
| C | -3.29894200 | -0.36006200 | -0.97930800 |
| H | -3.28007700 | 0.21495100  | -1.91591900 |
| H | -2.41210400 | -0.05655800 | -0.41583700 |
| C | -4.53338900 | 0.04169800  | -0.16434400 |
| H | -5.44524500 | -0.11845400 | -0.75112600 |
| H | -4.60528400 | -0.60888800 | 0.71768400  |
| C | -4.43839500 | 1.48180800  | 0.27553900  |
| C | -3.66003200 | 1.82799100  | 1.38573600  |
| C | -5.05601300 | 2.50630700  | -0.44398000 |
| C | -3.51738000 | 3.15644400  | 1.77589700  |
| H | -3.17162700 | 1.03802400  | 1.95510600  |

|   |             |             |             |
|---|-------------|-------------|-------------|
| C | -4.90851300 | 3.83889600  | -0.06503400 |
| H | -5.66102200 | 2.25366700  | -1.31142600 |
| C | -4.14052500 | 4.16921500  | 1.04813400  |
| H | -2.92896000 | 3.40329400  | 2.65589200  |
| H | -5.40119800 | 4.61986800  | -0.63655800 |
| H | -4.03655900 | 5.20603100  | 1.35359100  |
| C | 1.79576500  | -1.98477200 | -1.22041600 |
| H | 2.14575500  | -2.42852200 | -2.16205400 |
| C | 2.71001600  | -0.81326700 | -0.88819500 |
| H | 3.77155100  | -1.07078500 | -1.01733000 |
| H | 2.49058700  | -0.00425000 | -1.60134400 |
| C | 2.50051200  | -0.30422900 | 0.53892400  |
| H | 2.96006000  | -1.01109300 | 1.24065600  |
| H | 1.42738200  | -0.30320400 | 0.77056100  |
| C | 3.06523400  | 1.10295300  | 0.78126100  |
| H | 2.55438100  | 1.80771000  | 0.11040200  |
| H | 2.83773600  | 1.41743600  | 1.80856100  |
| C | 4.55411400  | 1.19009800  | 0.54755100  |
| C | 5.44899100  | 0.69477800  | 1.50019600  |
| C | 5.07103700  | 1.72563200  | -0.63349800 |
| C | 6.82201400  | 0.73532200  | 1.28077100  |
| H | 5.06004000  | 0.27344600  | 2.42483000  |
| C | 6.44463100  | 1.76792300  | -0.85994500 |
| H | 4.38517400  | 2.10907100  | -1.38605600 |
| C | 7.32490900  | 1.27339500  | 0.09791500  |

|   |             |             |             |
|---|-------------|-------------|-------------|
| H | 7.50158900  | 0.34805300  | 2.03413400  |
| H | 6.82679000  | 2.18735700  | -1.78586500 |
| H | 8.39613900  | 1.30665000  | -0.07495200 |
| F | 2.07814400  | -2.99201200 | -0.22949500 |
| H | -2.15126700 | -1.76235900 | -3.12565100 |
| F | -1.90476400 | -3.56541100 | -2.25769000 |

**2a'-conformer-12**

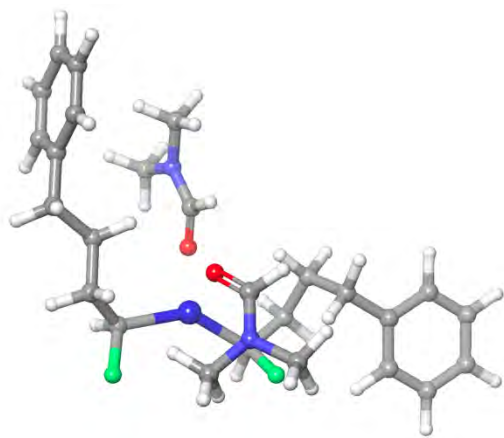

|    |             |             |             |
|----|-------------|-------------|-------------|
| Zn | -0.19436000 | 1.10363700  | -0.97258000 |
| O  | -0.02249600 | 0.74988100  | 1.16840300  |
| C  | -1.01037100 | 1.01720000  | 1.87154500  |
| N  | -1.67933200 | 2.16524400  | 1.86419600  |
| H  | -1.39278600 | 0.28361500  | 2.59634600  |
| O  | 0.75756900  | -0.76194100 | -1.36646500 |
| C  | 1.34319500  | -1.38628100 | -0.47260200 |

|   |             |             |             |
|---|-------------|-------------|-------------|
| N | 2.36998400  | -2.21104700 | -0.67999600 |
| H | 1.04638700  | -1.28009100 | 0.58003100  |
| C | -2.96677600 | 2.28005700  | 2.52434700  |
| H | -3.75736200 | 2.30609100  | 1.76696300  |
| H | -3.12854800 | 1.41944800  | 3.17715200  |
| H | -2.99890900 | 3.19555100  | 3.12155200  |
| C | -1.30812000 | 3.25700800  | 0.97294800  |
| H | -0.25714700 | 3.18741600  | 0.69780800  |
| H | -1.92722300 | 3.22192300  | 0.07254300  |
| H | -1.47472100 | 4.20195500  | 1.49718000  |
| C | 2.91360300  | -2.41014600 | -2.01117000 |
| H | 2.83412400  | -3.46474400 | -2.29465200 |
| H | 2.35029000  | -1.79644700 | -2.71263900 |
| H | 3.96861300  | -2.11700500 | -2.01687900 |
| C | 3.03759300  | -2.88554300 | 0.41705800  |
| H | 2.59284200  | -2.57240300 | 1.36393900  |
| H | 2.93477600  | -3.97133200 | 0.31451600  |
| H | 4.09945300  | -2.62347400 | 0.42280200  |
| C | 1.25962200  | 2.48498300  | -1.31343300 |
| C | 2.41412900  | 2.57338800  | -0.32424300 |
| H | 3.11204200  | 3.37146000  | -0.62511300 |
| H | 2.03456500  | 2.85784900  | 0.66786500  |
| C | 3.16661100  | 1.24977200  | -0.19087000 |
| H | 3.26654500  | 0.76832200  | -1.17617100 |
| H | 2.58292300  | 0.56308900  | 0.43449100  |

|   |             |             |             |
|---|-------------|-------------|-------------|
| C | 4.55665400  | 1.41731400  | 0.43351400  |
| H | 5.14926700  | 2.09147400  | -0.19740400 |
| H | 4.45515800  | 1.90963000  | 1.40826400  |
| C | 5.29421700  | 0.11095800  | 0.59967700  |
| C | 5.85995900  | -0.52840600 | -0.51000000 |
| C | 5.43198800  | -0.49509700 | 1.85069800  |
| C | 6.55824700  | -1.72539000 | -0.37144600 |
| H | 5.76887100  | -0.06470500 | -1.49043200 |
| C | 6.13105700  | -1.69257700 | 1.99726800  |
| H | 5.00003700  | -0.01104500 | 2.72339500  |
| C | 6.70079700  | -2.31032300 | 0.88681300  |
| H | 7.00386500  | -2.19544400 | -1.24362300 |
| H | 6.23774900  | -2.13811000 | 2.98196500  |
| H | 7.25470900  | -3.23718000 | 0.99945900  |
| C | -2.16423700 | 0.76626600  | -1.42405900 |
| H | -2.39331400 | 1.21433300  | -2.40148200 |
| C | -2.58157000 | -0.69510100 | -1.50819600 |
| H | -3.61865900 | -0.79413600 | -1.86237900 |
| H | -1.94386000 | -1.15214200 | -2.27721700 |
| C | -2.42015600 | -1.49940900 | -0.21566600 |
| H | -1.39887400 | -1.35719000 | 0.16327700  |
| H | -2.53570600 | -2.56968800 | -0.43272200 |
| C | -3.41251900 | -1.12854400 | 0.90301600  |
| H | -3.14900000 | -1.69001100 | 1.80949100  |
| H | -3.30964800 | -0.06358000 | 1.12504500  |

|   |             |             |             |
|---|-------------|-------------|-------------|
| C | -4.85170300 | -1.41567600 | 0.54778100  |
| C | -5.64159200 | -0.44415000 | -0.07525200 |
| C | -5.41525800 | -2.66614900 | 0.81248000  |
| C | -6.96259000 | -0.71782400 | -0.41902000 |
| H | -5.19632500 | 0.52066000  | -0.30334400 |
| C | -6.73587400 | -2.94328100 | 0.46947700  |
| H | -4.81055500 | -3.42928600 | 1.29852200  |
| C | -7.51499500 | -1.96721900 | -0.14639000 |
| H | -7.56259900 | 0.04752900  | -0.90268200 |
| H | -7.15812700 | -3.92001100 | 0.68728100  |
| H | -8.54615300 | -2.17927800 | -0.41235000 |
| F | -3.08881000 | 1.42872300  | -0.52811000 |
| H | 1.70448600  | 2.37214900  | -2.31474600 |
| F | 0.66514000  | 3.78548200  | -1.31624700 |

**2a'-conformer-13**

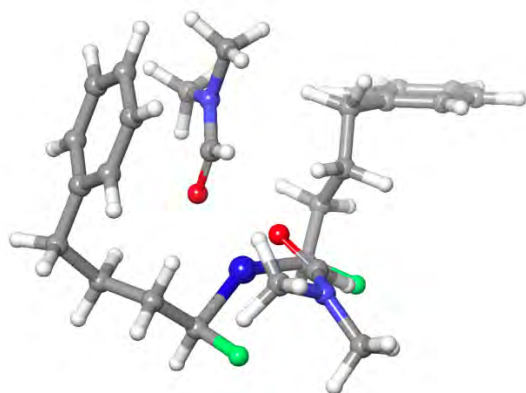



|    |             |             |             |
|----|-------------|-------------|-------------|
| Zn | 0.56164300  | -1.19117500 | 1.27388500  |
| O  | 0.83500800  | -1.28085600 | -0.91421600 |
| C  | 0.69779000  | -2.48968700 | -1.16166800 |
| N  | 1.53428400  | -3.18968100 | -1.92968500 |
| H  | -0.15705200 | -3.05036900 | -0.75647200 |
| O  | 0.54321200  | 0.92906800  | 1.11372000  |
| C  | 0.35309300  | 1.46538300  | 0.01430700  |
| N  | -0.35119000 | 2.59043100  | -0.15052800 |
| H  | 0.74838800  | 1.02817000  | -0.91218000 |
| C  | 1.47826600  | -4.63937100 | -1.91949500 |
| H  | 2.23945200  | -5.03712000 | -1.23907000 |
| H  | 0.49434800  | -4.96431900 | -1.57634500 |
| H  | 1.65008800  | -5.02746300 | -2.92722700 |
| C  | 2.79812500  | -2.58880100 | -2.32047500 |
| H  | 2.65898600  | -1.51351900 | -2.42993500 |
| H  | 3.54407400  | -2.77651400 | -1.54019100 |
| H  | 3.12619500  | -3.02196400 | -3.26865200 |
| C  | -0.56876000 | 3.16562800  | -1.46111600 |
| H  | -0.14926500 | 4.17666400  | -1.50744500 |
| H  | -0.07720500 | 2.54914300  | -2.21609000 |
| H  | -1.64170100 | 3.21284900  | -1.67640300 |
| C  | -0.89466500 | 3.30225200  | 0.99002700  |
| H  | -0.72781900 | 2.70470000  | 1.88513900  |
| H  | -0.39719000 | 4.27341600  | 1.09585500  |
| H  | -1.96810100 | 3.46828000  | 0.84928000  |

|   |             |             |             |
|---|-------------|-------------|-------------|
| C | 2.45067900  | -1.88745800 | 1.54763600  |
| C | 3.50846500  | -0.94509500 | 1.00119600  |
| H | 4.46008000  | -1.47978200 | 0.83898200  |
| H | 3.18315600  | -0.57032700 | 0.02067800  |
| C | 3.75057300  | 0.22928700  | 1.94511100  |
| H | 4.20423600  | -0.13944700 | 2.87360500  |
| H | 2.79087800  | 0.68727200  | 2.21838100  |
| C | 4.66122300  | 1.31111000  | 1.34143600  |
| H | 4.95142200  | 2.02088100  | 2.12452500  |
| H | 5.58410200  | 0.84361300  | 0.97650600  |
| C | 3.99823900  | 2.06861100  | 0.21653500  |
| C | 4.13874900  | 1.66893400  | -1.11566300 |
| C | 3.20234300  | 3.18533800  | 0.49131300  |
| C | 3.51231500  | 2.36717100  | -2.14594500 |
| H | 4.75668000  | 0.80385700  | -1.34493500 |
| C | 2.58519600  | 3.89566800  | -0.53421500 |
| H | 3.07806100  | 3.50502600  | 1.52366800  |
| C | 2.74010500  | 3.49027400  | -1.85906000 |
| H | 3.64321300  | 2.04465300  | -3.17478000 |
| H | 1.99066100  | 4.77563600  | -0.29936200 |
| H | 2.27174600  | 4.05174000  | -2.66264100 |
| C | -1.39716800 | -1.68063500 | 1.52622300  |
| H | -1.62267900 | -1.95312600 | 2.56621800  |
| C | -2.42777000 | -0.64916800 | 1.08577500  |
| H | -3.44450000 | -0.93511000 | 1.39391900  |

|   |             |             |             |
|---|-------------|-------------|-------------|
| H | -2.19729800 | 0.29994200  | 1.59641400  |
| C | -2.42491000 | -0.42809500 | -0.42563800 |
| H | -2.78871000 | -1.34026500 | -0.91382100 |
| H | -1.39451400 | -0.28933900 | -0.77674800 |
| C | -3.27633200 | 0.76924600  | -0.86975700 |
| H | -2.88763400 | 1.67524700  | -0.38499300 |
| H | -3.16646800 | 0.91343900  | -1.95280600 |
| C | -4.73998400 | 0.61904000  | -0.53141800 |
| C | -5.55770400 | -0.21997600 | -1.29376400 |
| C | -5.30252600 | 1.27774400  | 0.56335500  |
| C | -6.90011000 | -0.39405300 | -0.97345600 |
| H | -5.13228400 | -0.74113800 | -2.14875500 |
| C | -6.64556300 | 1.10698800  | 0.89021900  |
| H | -4.67544100 | 1.92827500  | 1.16968100  |
| C | -7.44933200 | 0.27064600  | 0.12108100  |
| H | -7.51998500 | -1.04809900 | -1.57953000 |
| H | -7.06371800 | 1.62772200  | 1.74656500  |
| H | -8.49698200 | 0.13679600  | 0.37217800  |
| F | -1.68395500 | -2.87126300 | 0.77217000  |
| H | 2.76280700  | -2.22113300 | 2.54606500  |
| F | 2.51409400  | -3.07316400 | 0.72831600  |

**2a'-conformer-14**

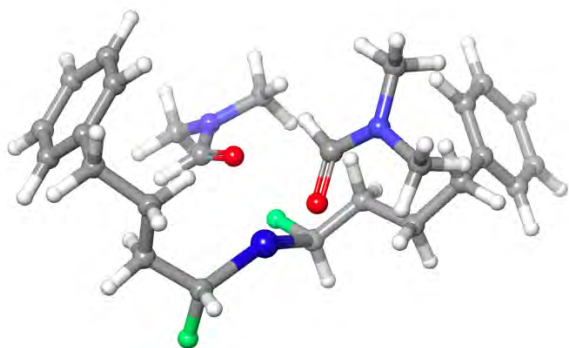

|    |             |             |             |
|----|-------------|-------------|-------------|
| Zn | 0.56643400  | -1.24810300 | 1.20012300  |
| O  | 1.08246700  | 0.30515200  | -0.28183700 |
| C  | 1.61730100  | 1.30917200  | 0.21000800  |
| N  | 1.15302000  | 2.55165800  | 0.08121900  |
| H  | 2.55822300  | 1.23689900  | 0.77662200  |
| O  | -0.28191000 | -2.29659500 | -0.45978500 |
| C  | -0.67081300 | -1.70858300 | -1.47254700 |
| N  | -1.57438900 | -2.20849600 | -2.32706600 |
| H  | -0.28091800 | -0.71664500 | -1.73692100 |
| C  | 1.70180600  | 3.62568500  | 0.88433200  |
| H  | 1.02523200  | 3.85385800  | 1.71558700  |
| H  | 2.67277600  | 3.32379800  | 1.28109200  |
| H  | 1.83778300  | 4.52029500  | 0.26882500  |
| C  | -0.14948200 | 2.77905300  | -0.51605300 |
| H  | -0.35174400 | 1.98250400  | -1.23175600 |
| H  | -0.91958100 | 2.76519400  | 0.26177400  |
| H  | -0.14583200 | 3.74430600  | -1.02949900 |

|   |             |             |             |
|---|-------------|-------------|-------------|
| C | -2.19820700 | -3.49679300 | -2.08442100 |
| H | -2.03437000 | -4.15798400 | -2.94127100 |
| H | -1.75390500 | -3.93355600 | -1.19109200 |
| H | -3.27596600 | -3.36641500 | -1.93542000 |
| C | -2.02031700 | -1.45804200 | -3.48263100 |
| H | -1.49385400 | -0.50204100 | -3.52401300 |
| H | -1.81774900 | -2.01546600 | -4.40304000 |
| H | -3.09765000 | -1.26576400 | -3.41808700 |
| C | -0.94800400 | -0.07601200 | 1.89878900  |
| C | -2.12961300 | 0.10271500  | 0.96068500  |
| H | -2.70547000 | 0.99958900  | 1.23613300  |
| H | -1.77518000 | 0.27750700  | -0.07065000 |
| C | -3.05184100 | -1.11348200 | 0.97447500  |
| H | -3.54818000 | -1.18063400 | 1.95143100  |
| H | -2.45545400 | -2.02932300 | 0.86209200  |
| C | -4.11515400 | -1.08035500 | -0.13445300 |
| H | -3.60537800 | -1.10183000 | -1.10692100 |
| H | -4.73213500 | -1.98590200 | -0.07437300 |
| C | -4.99998500 | 0.14055600  | -0.07351200 |
| C | -4.78310400 | 1.23010200  | -0.91945900 |
| C | -6.03260400 | 0.22268800  | 0.86458600  |
| C | -5.57523300 | 2.37232900  | -0.83524400 |
| H | -3.97808500 | 1.18026800  | -1.65055900 |
| C | -6.82798800 | 1.36067000  | 0.95355200  |
| H | -6.21329300 | -0.61846200 | 1.53040800  |

|   |             |             |             |
|---|-------------|-------------|-------------|
| C | -6.60177900 | 2.44031200  | 0.10225600  |
| H | -5.39155600 | 3.20890100  | -1.50300700 |
| H | -7.62776900 | 1.40482200  | 1.68671800  |
| H | -7.22292600 | 3.32806500  | 0.16927800  |
| C | 2.24280900  | -2.23133500 | 1.75155800  |
| H | 2.18759700  | -3.31712300 | 1.56997200  |
| C | 3.52182700  | -1.72418300 | 1.10198700  |
| H | 3.63198900  | -0.64944900 | 1.30351400  |
| H | 4.40116600  | -2.20678400 | 1.55932100  |
| C | 3.53908300  | -1.96757600 | -0.40416600 |
| H | 2.61514200  | -1.57364400 | -0.84676200 |
| H | 3.55006500  | -3.04809300 | -0.59627000 |
| C | 4.74508500  | -1.32300000 | -1.10849000 |
| H | 5.67008900  | -1.66718900 | -0.63017200 |
| H | 4.78034200  | -1.65837000 | -2.15170900 |
| C | 4.68950200  | 0.18544900  | -1.07674100 |
| C | 3.91261300  | 0.88296400  | -2.00742100 |
| C | 5.36672000  | 0.91949700  | -0.09892600 |
| C | 3.82050800  | 2.27130600  | -1.97037100 |
| H | 3.36995300  | 0.32380800  | -2.76647800 |
| C | 5.27657000  | 2.30998500  | -0.05337900 |
| H | 5.97158100  | 0.39138400  | 0.63427100  |
| C | 4.50637200  | 2.99116200  | -0.99328600 |
| H | 3.21287200  | 2.79351900  | -2.70399200 |
| H | 5.81702900  | 2.86076700  | 0.71117700  |

|   |             |             |             |
|---|-------------|-------------|-------------|
| H | 4.44362700  | 4.07531900  | -0.96720300 |
| F | 2.42886900  | -2.09425900 | 3.15300500  |
| H | -1.34632600 | -0.32581000 | 2.89173900  |
| F | -0.36625300 | 1.23164500  | 2.05729400  |

**2a'-conformer-15**

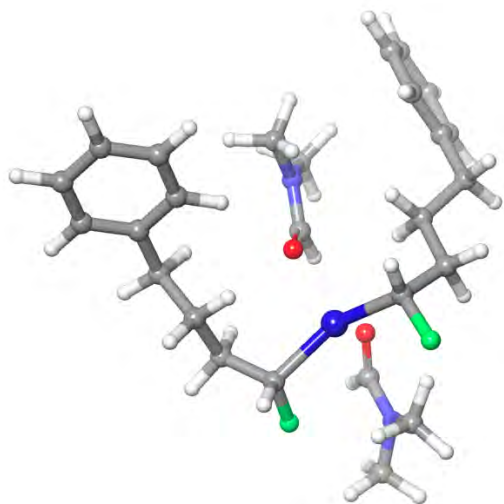

|    |             |             |             |
|----|-------------|-------------|-------------|
| Zn | -0.07232000 | 1.74854700  | 0.64229800  |
| O  | -1.60960900 | 1.86924600  | -0.89449800 |
| C  | -1.88251300 | 2.93490600  | -1.46379100 |
| N  | -2.16967500 | 4.08918400  | -0.86543200 |
| H  | -1.94601700 | 2.97787100  | -2.56056700 |
| O  | 0.55037600  | -0.17312200 | -0.10145200 |
| C  | -0.07989900 | -0.72637200 | -1.01406200 |
| N  | -0.06037900 | -2.03907900 | -1.23385600 |

|   |             |             |             |
|---|-------------|-------------|-------------|
| H | -0.72270100 | -0.14852400 | -1.69133500 |
| C | -2.14965200 | 5.31939500  | -1.63548000 |
| H | -1.18659400 | 5.82157600  | -1.49571900 |
| H | -2.28304600 | 5.09588900  | -2.69594300 |
| H | -2.95954700 | 5.97552000  | -1.30651400 |
| C | -1.99837400 | 4.23957400  | 0.57214500  |
| H | -2.21627900 | 3.30820300  | 1.09230100  |
| H | -0.96834100 | 4.54479800  | 0.78681500  |
| H | -2.68751200 | 5.00931700  | 0.92810200  |
| C | 0.72821300  | -2.90741800 | -0.37326900 |
| H | 1.75933500  | -2.98998600 | -0.73415800 |
| H | 0.74162900  | -2.49016100 | 0.63518000  |
| H | 0.26095900  | -3.89413000 | -0.35555500 |
| C | -0.80903300 | -2.64143100 | -2.32170800 |
| H | -1.36917000 | -1.86567400 | -2.84770000 |
| H | -0.12960900 | -3.12955500 | -3.02831000 |
| H | -1.51246200 | -3.37940600 | -1.92571700 |
| C | -1.14556900 | 1.25321800  | 2.29397400  |
| C | -2.48484700 | 0.55982200  | 2.06989500  |
| H | -2.96078000 | 0.32732300  | 3.03614200  |
| H | -3.17104100 | 1.24135600  | 1.54681300  |
| C | -2.34291600 | -0.71391300 | 1.23736700  |
| H | -1.43484100 | -1.25970000 | 1.53553100  |
| H | -2.21000700 | -0.43907500 | 0.18456700  |
| C | -3.55153700 | -1.64890500 | 1.34759800  |



|   |             |             |             |
|---|-------------|-------------|-------------|
| H | -3.68365000 | -1.93773200 | 2.39802800  |
| H | -4.45811900 | -1.10451300 | 1.05685000  |
| C | -3.41348700 | -2.89263400 | 0.50173200  |
| C | -2.49895300 | -3.89125300 | 0.85758700  |
| C | -4.18652100 | -3.08672800 | -0.64546600 |
| C | -2.38144400 | -5.05858100 | 0.10786300  |
| H | -1.89008200 | -3.75831900 | 1.74975000  |
| C | -4.07373800 | -4.25294000 | -1.40168300 |
| H | -4.90103800 | -2.32092500 | -0.93752700 |
| C | -3.17476400 | -5.24695200 | -1.02417600 |
| H | -1.68060400 | -5.83001200 | 0.41530600  |
| H | -4.69655200 | -4.38791000 | -2.28111900 |
| H | -3.09362400 | -6.16166500 | -1.60331600 |
| C | 1.25101800  | 3.03964000  | -0.22977200 |
| H | 1.85683800  | 3.64197100  | 0.46353900  |
| C | 2.20014300  | 2.30632600  | -1.16571700 |
| H | 1.61757700  | 1.68134800  | -1.85951500 |
| H | 2.76680700  | 3.01522000  | -1.78735500 |
| C | 3.15794900  | 1.41744200  | -0.36992800 |
| H | 2.63474600  | 1.03026600  | 0.51370600  |
| H | 4.00178800  | 2.00695200  | 0.00859200  |
| C | 3.68174400  | 0.22508800  | -1.17687600 |
| H | 2.81515400  | -0.30287800 | -1.59793700 |
| H | 4.27869500  | 0.58040700  | -2.02578800 |
| C | 4.48881000  | -0.74276300 | -0.34578100 |

|   |             |             |             |
|---|-------------|-------------|-------------|
| C | 3.87795200  | -1.41520100 | 0.71951800  |
| C | 5.83794300  | -0.98826700 | -0.60049500 |
| C | 4.59571000  | -2.31322000 | 1.50191000  |
| H | 2.82747900  | -1.21968200 | 0.92754600  |
| C | 6.56237100  | -1.88604800 | 0.18213600  |
| H | 6.32632100  | -0.47053000 | -1.42261500 |
| C | 5.94317700  | -2.55261500 | 1.23457900  |
| H | 4.10587700  | -2.82547200 | 2.32516900  |
| H | 7.61227500  | -2.06346200 | -0.03185800 |
| H | 6.50577300  | -3.25198500 | 1.84544300  |
| F | 0.55893300  | 4.00817500  | -1.03596800 |
| H | -0.56885500 | 0.62147300  | 2.98738400  |
| F | -1.45200400 | 2.43567400  | 3.03561800  |

**2a'-conformer-16**

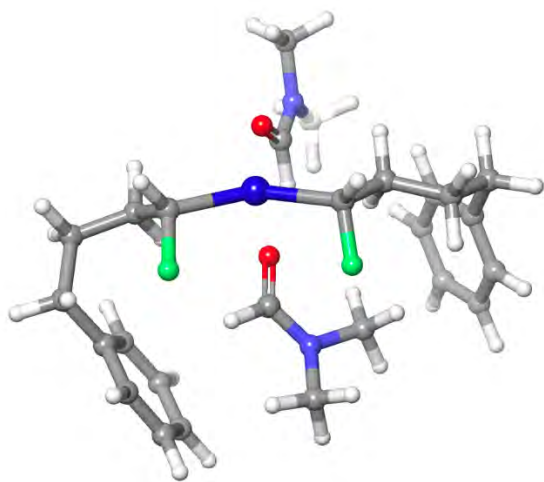

|    |             |             |             |
|----|-------------|-------------|-------------|
| Zn | 0.53831200  | -1.47950300 | 1.33797600  |
| O  | 0.36286300  | 0.06828900  | -0.22685900 |
| C  | 0.93919600  | 1.08604100  | 0.19466500  |
| N  | 0.37896700  | 2.29497900  | 0.22059800  |
| H  | 1.97256600  | 1.03548200  | 0.56774000  |
| O  | -0.57157900 | -2.76210100 | 0.04096800  |
| C  | -1.16825300 | -2.29800000 | -0.93638700 |
| N  | -2.03647200 | -2.99880900 | -1.67930100 |
| H  | -1.01884500 | -1.25831100 | -1.25567700 |
| C  | 0.98788700  | 3.36038800  | 0.99202200  |
| H  | 0.42326900  | 3.51138100  | 1.91917400  |
| H  | 2.01466400  | 3.08845000  | 1.23903700  |
| H  | 0.99508800  | 4.28994800  | 0.41405500  |
| C  | -1.03374300 | 2.44327700  | -0.08177000 |

|   |             |             |             |
|---|-------------|-------------|-------------|
| H | -1.34302600 | 1.67266800  | -0.78878800 |
| H | -1.61789900 | 2.33464200  | 0.83864300  |
| H | -1.21085600 | 3.43045500  | -0.51710800 |
| C | -2.33544200 | -4.38558300 | -1.37299600 |
| H | -2.00692700 | -5.03256600 | -2.19327400 |
| H | -1.81091300 | -4.65858500 | -0.45868100 |
| H | -3.41399400 | -4.51114100 | -1.23406900 |
| C | -2.65621800 | -2.42301600 | -2.85459700 |
| H | -2.33525200 | -1.38480500 | -2.96058700 |
| H | -2.36571600 | -2.98002700 | -3.75205800 |
| H | -3.74815300 | -2.44879900 | -2.76439500 |
| C | -0.90408400 | -0.57068100 | 2.44502800  |
| C | -2.24666300 | -0.58970900 | 1.73469900  |
| H | -2.09870600 | -0.24692100 | 0.69971400  |
| H | -2.58934000 | -1.63396100 | 1.66895900  |
| C | -3.33473100 | 0.26225700  | 2.38567800  |
| H | -2.95096000 | 1.27859300  | 2.53775200  |
| H | -3.56164300 | -0.13777000 | 3.38213100  |
| C | -4.62941600 | 0.31674000  | 1.55789300  |
| H | -4.98960500 | -0.70562900 | 1.38691600  |
| H | -5.40872900 | 0.83726600  | 2.12687300  |
| C | -4.44053100 | 1.01211500  | 0.23069200  |
| C | -4.45120800 | 2.40834700  | 0.16140800  |
| C | -4.21769100 | 0.29500500  | -0.94874000 |
| C | -4.24978000 | 3.07138400  | -1.04621300 |

|   |             |             |             |
|---|-------------|-------------|-------------|
| H | -4.62344000 | 2.98042300  | 1.07076300  |
| C | -4.02377200 | 0.95235700  | -2.16216800 |
| H | -4.20099000 | -0.79332600 | -0.90671900 |
| C | -4.03703600 | 2.34410500  | -2.21515000 |
| H | -4.26776700 | 4.15700500  | -1.07655400 |
| H | -3.87873000 | 0.37989900  | -3.07430300 |
| H | -3.89035400 | 2.85704300  | -3.16055000 |
| C | 2.51607600  | -1.83102400 | 1.10776400  |
| H | 3.00721400  | -2.61642000 | 1.69784600  |
| C | 2.86590700  | -2.02063200 | -0.35891100 |
| H | 2.40038400  | -2.96615400 | -0.67304200 |
| H | 2.37141500  | -1.23630800 | -0.94553800 |
| C | 4.35458700  | -2.06985400 | -0.72688900 |
| H | 4.44590800  | -2.24062200 | -1.80873500 |
| H | 4.81854900  | -2.94051700 | -0.24584500 |
| C | 5.17512200  | -0.82997200 | -0.33603000 |
| H | 5.30801500  | -0.81403600 | 0.74794100  |
| H | 6.17717800  | -0.92376100 | -0.77728500 |
| C | 4.58625800  | 0.50009300  | -0.75392600 |
| C | 3.90885000  | 0.66633700  | -1.96515600 |
| C | 4.72700800  | 1.61660200  | 0.07615900  |
| C | 3.37561500  | 1.90109300  | -2.32972400 |
| H | 3.78258300  | -0.18529400 | -2.62869000 |
| C | 4.21919200  | 2.85903200  | -0.29309600 |
| H | 5.23550700  | 1.50093000  | 1.02985000  |

|   |             |             |             |
|---|-------------|-------------|-------------|
| C | 3.52904100  | 3.00487300  | -1.49537000 |
| H | 2.84095200  | 2.00023500  | -3.26993800 |
| H | 4.35354000  | 3.71401200  | 0.36460100  |
| H | 3.11787500  | 3.96925000  | -1.77945000 |
| F | 3.13871600  | -0.60388800 | 1.54339100  |
| H | -1.05319200 | -0.87775800 | 3.48889400  |
| F | -0.52691400 | 0.81810900  | 2.52281600  |

**2a'-conformer-17**

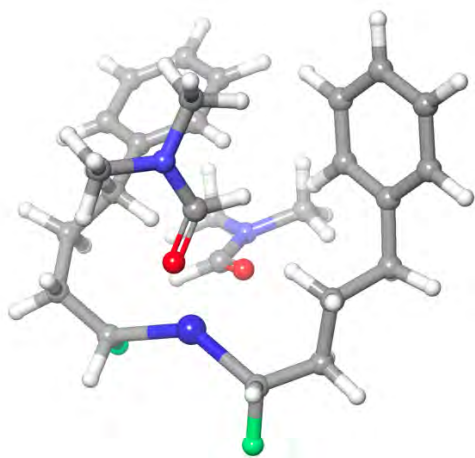

|    |             |             |             |
|----|-------------|-------------|-------------|
| Zn | 0.54714400  | -2.38237900 | -0.16918300 |
| O  | 0.19390000  | -0.70343100 | 1.18757000  |
| C  | 1.22836600  | -0.26467900 | 1.72188600  |
| N  | 1.23400800  | 0.66070000  | 2.68063800  |
| H  | 2.21731300  | -0.64528500 | 1.43650200  |
| O  | -0.18580600 | -1.37786600 | -1.94930300 |

|   |             |             |             |
|---|-------------|-------------|-------------|
| C | -0.77270000 | -0.30348300 | -2.10016900 |
| N | -0.66291100 | 0.47038200  | -3.18606000 |
| H | -1.44307700 | 0.10847200  | -1.33042800 |
| C | -0.00702300 | 1.20738200  | 3.19410200  |
| H | -0.25440700 | 2.14874300  | 2.68893400  |
| H | -0.80639500 | 0.48454700  | 3.02979900  |
| H | 0.10368600  | 1.39597100  | 4.26528300  |
| C | 2.46992400  | 1.31372000  | 3.07199200  |
| H | 3.31466200  | 0.79853500  | 2.61020700  |
| H | 2.46338100  | 2.35549400  | 2.73038400  |
| H | 2.58259900  | 1.28578200  | 4.15992400  |
| C | 0.19455700  | 0.08561300  | -4.29207600 |
| H | 0.92425600  | 0.87852400  | -4.48769500 |
| H | 0.71209500  | -0.83565400 | -4.02683600 |
| H | -0.40431900 | -0.07401500 | -5.19470000 |
| C | -1.36534600 | 1.73541300  | -3.28785100 |
| H | -2.02109700 | 1.86380100  | -2.42327300 |
| H | -0.64923800 | 2.56426900  | -3.32054800 |
| H | -1.97281600 | 1.75560100  | -4.19829200 |
| C | -0.94036300 | -3.66609300 | 0.35137200  |
| C | -1.99707500 | -3.03174900 | 1.24860200  |
| H | -2.75526600 | -3.76825600 | 1.55625000  |
| H | -1.51721200 | -2.67000600 | 2.16886700  |
| C | -2.65137200 | -1.84615000 | 0.54789100  |
| H | -3.24671600 | -2.18069800 | -0.31250700 |

|   |             |             |             |
|---|-------------|-------------|-------------|
| H | -1.84661000 | -1.22430200 | 0.14583000  |
| C | -3.50998400 | -0.96038500 | 1.45943600  |
| H | -4.44854800 | -1.46388000 | 1.71729600  |
| H | -2.96542300 | -0.80640700 | 2.40050000  |
| C | -3.79004300 | 0.38292900  | 0.82895400  |
| C | -2.73397300 | 1.28559500  | 0.64236000  |
| C | -5.06056200 | 0.75331600  | 0.38900300  |
| C | -2.94497400 | 2.52353900  | 0.04233800  |
| H | -1.73620500 | 0.99246400  | 0.96855900  |
| C | -5.27697800 | 1.98972800  | -0.21922900 |
| H | -5.89078400 | 0.06463900  | 0.52428000  |
| C | -4.22197200 | 2.87997200  | -0.39416200 |
| H | -2.11319300 | 3.21255800  | -0.09100500 |
| H | -6.27453600 | 2.25803300  | -0.55409800 |
| H | -4.39171100 | 3.84555900  | -0.86066800 |
| C | 2.57953600  | -2.41260700 | -0.47964900 |
| H | 2.78395700  | -3.45264400 | -0.77475500 |
| C | 3.35536600  | -1.54624800 | -1.47079100 |
| H | 4.36788900  | -1.95356900 | -1.60576400 |
| H | 2.85508900  | -1.60479900 | -2.44833100 |
| C | 3.50518800  | -0.07929500 | -1.05041400 |
| H | 4.28562900  | 0.39667800  | -1.65670700 |
| H | 3.86704100  | -0.05531700 | -0.01418200 |
| C | 2.20379500  | 0.71236300  | -1.17102600 |
| H | 1.99415000  | 0.88604200  | -2.23752100 |



|   |             |             |             |
|---|-------------|-------------|-------------|
| H | 1.38201800  | 0.09097700  | -0.81019400 |
| C | 2.15538200  | 2.03479700  | -0.43937600 |
| C | 0.92435800  | 2.52954200  | 0.01054400  |
| C | 3.29882000  | 2.80151700  | -0.20048200 |
| C | 0.83397200  | 3.75591600  | 0.66283200  |
| H | 0.02832700  | 1.92834300  | -0.14843500 |
| C | 3.21456000  | 4.03173000  | 0.45129600  |
| H | 4.26718800  | 2.43489800  | -0.52907100 |
| C | 1.98295300  | 4.51570100  | 0.88342900  |
| H | -0.13201400 | 4.11910800  | 1.00548000  |
| H | 4.11608100  | 4.61286300  | 0.62140700  |
| H | 1.91687600  | 5.47351200  | 1.39008400  |
| F | 3.27813300  | -2.26819700 | 0.77207500  |
| H | -1.46067800 | -4.08313100 | -0.52710700 |
| F | -0.43093300 | -4.78755700 | 1.05403100  |

**2a'-conformer-18**

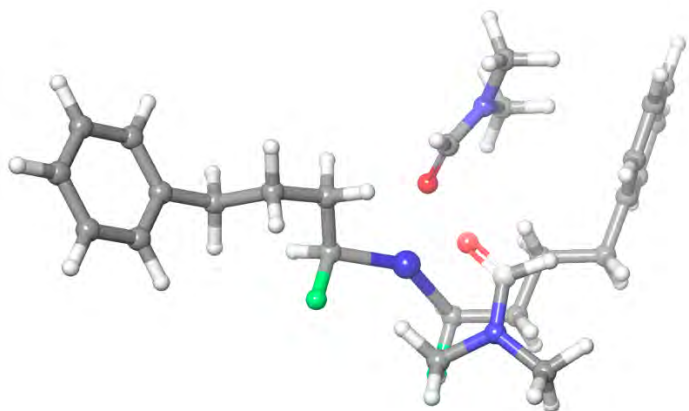

|    |             |             |             |
|----|-------------|-------------|-------------|
| Zn | 0.17797400  | 1.28447400  | 1.09085600  |
| O  | 1.00818700  | 1.93199000  | -0.88291700 |
| C  | 0.85977600  | 3.15568800  | -0.75725500 |
| N  | 0.39157600  | 3.95728100  | -1.71882200 |
| H  | 1.12977900  | 3.66660800  | 0.18130600  |
| O  | 0.21743800  | -0.83114700 | 0.93657200  |
| C  | 0.58618600  | -1.62185700 | 0.06053200  |
| N  | -0.10685800 | -2.69962300 | -0.31292800 |
| H  | 1.54094100  | -1.49340100 | -0.47336800 |
| C  | -0.05450600 | 5.29553400  | -1.37888400 |
| H  | -1.13948100 | 5.29964600  | -1.22604300 |
| H  | 0.43115200  | 5.61815100  | -0.45605400 |
| H  | 0.20684300  | 5.99149000  | -2.18072100 |
| C  | -0.20209500 | 3.35292600  | -2.89781200 |

|   |             |             |             |
|---|-------------|-------------|-------------|
| H | 0.33314500  | 2.43352800  | -3.13152600 |
| H | -1.25369100 | 3.11701200  | -2.69515700 |
| H | -0.13072600 | 4.04957300  | -3.73660000 |
| C | -1.40257600 | -2.99771300 | 0.27723900  |
| H | -1.41301500 | -4.03066100 | 0.63973100  |
| H | -1.57696700 | -2.31420700 | 1.10660000  |
| H | -2.20157900 | -2.87170600 | -0.46246900 |
| C | 0.38279700  | -3.59016200 | -1.34631500 |
| H | 1.34696900  | -3.23302400 | -1.71474400 |
| H | 0.51554700  | -4.60005400 | -0.94365200 |
| H | -0.33179700 | -3.63193500 | -2.17499600 |
| C | -1.71238400 | 1.61146400  | 0.41258000  |
| C | -2.07381900 | 0.66442900  | -0.72052300 |
| H | -1.28214400 | 0.71009700  | -1.48259200 |
| H | -2.06002100 | -0.35896000 | -0.32203000 |
| C | -3.42535500 | 0.92840600  | -1.39301100 |
| H | -3.52203900 | 0.30035600  | -2.28911700 |
| H | -3.46107500 | 1.97197200  | -1.72653400 |
| C | -4.63092700 | 0.66624100  | -0.47511500 |
| H | -4.59650300 | 1.35204200  | 0.37781400  |
| H | -5.55332900 | 0.89197800  | -1.02357800 |
| C | -4.68449600 | -0.75766400 | 0.02648100  |
| C | -5.04575300 | -1.79996100 | -0.83467400 |
| C | -4.35312400 | -1.07652100 | 1.34569000  |
| C | -5.08689300 | -3.11839400 | -0.38959400 |

|   |             |             |             |
|---|-------------|-------------|-------------|
| H | -5.31111900 | -1.56832600 | -1.86415600 |
| C | -4.39346500 | -2.39448700 | 1.79852100  |
| H | -4.06514900 | -0.27886400 | 2.02666600  |
| C | -4.76117100 | -3.42086800 | 0.93225400  |
| H | -5.38287500 | -3.91032700 | -1.07169600 |
| H | -4.13994000 | -2.61743800 | 2.83103600  |
| H | -4.80145700 | -4.44725000 | 1.28463700  |
| C | 1.71263600  | 1.97561400  | 2.22813800  |
| H | 1.71033600  | 1.58609900  | 3.25599200  |
| C | 3.09750000  | 1.72594900  | 1.63442300  |
| H | 3.25475100  | 2.42568600  | 0.80224600  |
| H | 3.90169300  | 1.91844100  | 2.36133000  |
| C | 3.18453300  | 0.30608800  | 1.08724800  |
| H | 2.51861400  | 0.25372800  | 0.21853800  |
| H | 2.79081000  | -0.40952600 | 1.82344700  |
| C | 4.57604700  | -0.15609800 | 0.64176500  |
| H | 5.01416500  | 0.59118100  | -0.03055500 |
| H | 5.24106200  | -0.24040300 | 1.50958000  |
| C | 4.46044600  | -1.48268200 | -0.06834900 |
| C | 4.39440000  | -1.54703900 | -1.46303200 |
| C | 4.30282700  | -2.66786700 | 0.65800000  |
| C | 4.19222700  | -2.76144100 | -2.11687000 |
| H | 4.50536600  | -0.63248300 | -2.04077900 |
| C | 4.09501200  | -3.88312300 | 0.01157600  |
| H | 4.34417600  | -2.63218200 | 1.74436000  |

|   |             |             |             |
|---|-------------|-------------|-------------|
| C | 4.04370900  | -3.93513400 | -1.38064600 |
| H | 4.15788300  | -2.79101400 | -3.20222400 |
| H | 3.98235700  | -4.79264800 | 0.59441000  |
| H | 3.89269600  | -4.88380700 | -1.88746500 |
| F | 1.58740600  | 3.39463600  | 2.37015100  |
| H | -2.51711900 | 1.60275700  | 1.16066500  |
| F | -1.76348300 | 2.93706600  | -0.15561500 |

**2a'-conformer-19**

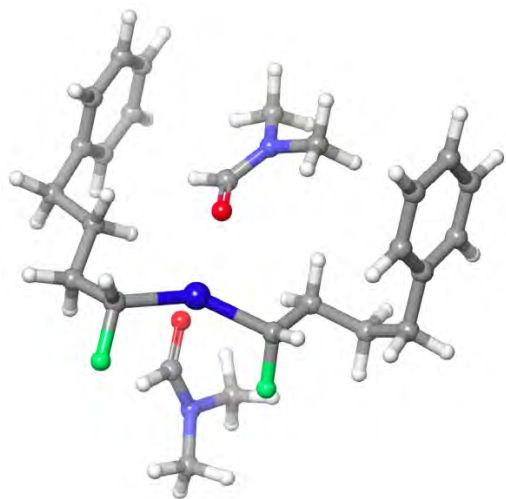

|    |             |            |             |
|----|-------------|------------|-------------|
| Zn | 0.07929600  | 0.88464600 | -0.96917600 |
| O  | -0.54318600 | 0.73594300 | 1.13267100  |
| C  | -1.03785400 | 1.64594500 | 1.80824300  |
| N  | -0.64400700 | 2.91752900 | 1.80846700  |

|   |             |             |             |
|---|-------------|-------------|-------------|
| H | -1.87299300 | 1.43853200  | 2.49610600  |
| O | -0.80992100 | -1.04948100 | -1.18910500 |
| C | -0.96848400 | -1.78231500 | -0.20628300 |
| N | -1.96980700 | -2.65754900 | -0.07954200 |
| H | -0.28313000 | -1.74994500 | 0.65130500  |
| C | 0.43807000  | 3.36742800  | 0.93564100  |
| H | 0.91852100  | 4.22828400  | 1.40712700  |
| H | 1.18228700  | 2.57820100  | 0.81567700  |
| H | 0.04295200  | 3.65981400  | -0.04419700 |
| C | -1.41269400 | 3.93975100  | 2.49214800  |
| H | -2.20478900 | 3.47599800  | 3.08415000  |
| H | -0.76292700 | 4.51729700  | 3.15586800  |
| H | -1.86731100 | 4.61813400  | 1.76195200  |
| C | -2.07085000 | -3.53685100 | 1.06739700  |
| H | -1.95753800 | -4.58204100 | 0.75924300  |
| H | -1.28822300 | -3.29294500 | 1.78866400  |
| H | -3.04963300 | -3.41252300 | 1.54031800  |
| C | -2.97384600 | -2.80609000 | -1.12068100 |
| H | -2.82355400 | -2.02057500 | -1.85987500 |
| H | -2.87263900 | -3.78593800 | -1.60048200 |
| H | -3.97219000 | -2.72018400 | -0.68082700 |
| C | 2.06615300  | 0.52259600  | -0.79113800 |
| C | 2.39672200  | -0.63448900 | 0.14269800  |
| H | 1.80777600  | -0.55621800 | 1.06886700  |
| H | 2.07626400  | -1.56026500 | -0.36033600 |

|   |             |             |             |
|---|-------------|-------------|-------------|
| C | 3.87765100  | -0.73912300 | 0.53069400  |
| H | 4.04510600  | -1.64386200 | 1.12944100  |
| H | 4.13901800  | 0.11297400  | 1.16780400  |
| C | 4.82814600  | -0.74817300 | -0.67308300 |
| H | 4.52754800  | -1.53778400 | -1.37440000 |
| H | 4.73293400  | 0.20721600  | -1.19964300 |
| C | 6.26018800  | -0.95559100 | -0.24888800 |
| C | 7.03539300  | 0.12539600  | 0.18050200  |
| C | 6.82836500  | -2.23127300 | -0.22137000 |
| C | 8.34166800  | -0.06164800 | 0.62239700  |
| H | 6.60391800  | 1.12383200  | 0.16263200  |
| C | 8.13520900  | -2.42484000 | 0.21861700  |
| H | 6.23680700  | -3.08154700 | -0.55384600 |
| C | 8.89694700  | -1.33919600 | 0.64246100  |
| H | 8.92938400  | 0.79180000  | 0.94788500  |
| H | 8.56032700  | -3.42437300 | 0.22705600  |
| H | 9.91727200  | -1.48668500 | 0.98316500  |
| C | -1.35070900 | 2.08949500  | -1.77595500 |
| H | -1.59768100 | 1.73621500  | -2.78961400 |
| C | -2.67083900 | 2.25085700  | -1.03403400 |
| H | -2.49521300 | 2.74801200  | -0.06656800 |
| H | -3.34721400 | 2.91823500  | -1.59164700 |
| C | -3.35920900 | 0.91236200  | -0.78364000 |
| H | -2.71652900 | 0.27921300  | -0.15999800 |
| H | -3.48431000 | 0.37564600  | -1.73468800 |

|   |             |             |             |
|---|-------------|-------------|-------------|
| C | -4.72446100 | 1.04873800  | -0.09995200 |
| H | -4.60281700 | 1.61728400  | 0.83192800  |
| H | -5.40153400 | 1.62943100  | -0.73744000 |
| C | -5.33091500 | -0.29826500 | 0.20463600  |
| C | -6.19403600 | -0.92098300 | -0.70090100 |
| C | -4.99787500 | -0.98096300 | 1.37866800  |
| C | -6.72013200 | -2.18431200 | -0.43914500 |
| H | -6.45988300 | -0.40358600 | -1.61977500 |
| C | -5.52904500 | -2.23944600 | 1.65193100  |
| H | -4.32418600 | -0.51058900 | 2.09251500  |
| C | -6.39157300 | -2.84771800 | 0.74097700  |
| H | -7.39392400 | -2.64735600 | -1.15380600 |
| H | -5.27974000 | -2.74155100 | 2.58302600  |
| H | -6.81055500 | -3.82628300 | 0.95379500  |
| F | -0.85293700 | 3.41525700  | -1.96408800 |
| H | 2.56016500  | 0.32772800  | -1.75296900 |
| F | 2.75282200  | 1.66493400  | -0.26211000 |

**2a'-conformer-20**



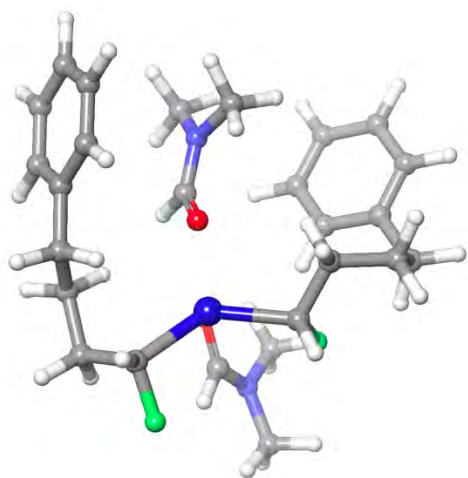

|    |             |             |             |
|----|-------------|-------------|-------------|
| Zn | -0.10968100 | -1.57344900 | -0.92645500 |
| O  | -0.71927300 | -1.38152300 | 1.18006000  |
| C  | -1.53270400 | -2.31678800 | 1.24370100  |
| N  | -2.63202900 | -2.31303700 | 1.99905000  |
| H  | -1.36866300 | -3.24811400 | 0.67798900  |
| O  | 0.93379100  | 0.23004400  | -0.76117700 |
| C  | 1.17306300  | 0.86650200  | 0.27463300  |
| N  | 1.44819300  | 2.16856300  | 0.30195700  |
| H  | 1.17689900  | 0.37919800  | 1.25906500  |
| C  | -3.03731500 | -1.10310900 | 2.69030500  |
| H  | -3.47393800 | -1.36640900 | 3.65756400  |
| H  | -2.16176800 | -0.47216700 | 2.83763000  |
| H  | -3.77565600 | -0.55600900 | 2.09253200  |
| C  | -3.63948400 | -3.34209000 | 1.82760700  |

|   |             |             |             |
|---|-------------|-------------|-------------|
| H | -3.20903700 | -4.18979900 | 1.29160900  |
| H | -3.99788900 | -3.68190300 | 2.80349500  |
| H | -4.48314000 | -2.94968700 | 1.24886200  |
| C | 1.74713500  | 2.86008300  | 1.53807700  |
| H | 0.98238000  | 3.61799500  | 1.73644300  |
| H | 1.77213200  | 2.14350300  | 2.36235800  |
| H | 2.72833000  | 3.33814000  | 1.46414900  |
| C | 1.32727500  | 2.97869900  | -0.89684800 |
| H | 1.25135700  | 2.31735600  | -1.75902800 |
| H | 0.42639100  | 3.60066500  | -0.82474700 |
| H | 2.21057500  | 3.61618100  | -0.99455800 |
| C | -1.87898300 | -0.97187100 | -1.75548700 |
| C | -1.84911600 | 0.44824700  | -2.30414300 |
| H | -1.24878400 | 1.10752900  | -1.66589900 |
| H | -1.28948300 | 0.37879200  | -3.24898600 |
| C | -3.19450100 | 1.12841800  | -2.57935000 |
| H | -3.82347800 | 0.47168200  | -3.19416500 |
| H | -3.01417100 | 2.03835300  | -3.16804800 |
| C | -3.99115400 | 1.52517800  | -1.31883600 |
| H | -4.87622900 | 2.09356300  | -1.62862000 |
| H | -4.33868500 | 0.61739700  | -0.82292000 |
| C | -3.19579800 | 2.35449000  | -0.33745700 |
| C | -2.33603800 | 1.74216300  | 0.58520800  |
| C | -3.28809300 | 3.74797600  | -0.33254200 |
| C | -1.61988900 | 2.50428300  | 1.50303200  |

|   |             |             |             |
|---|-------------|-------------|-------------|
| H | -2.22977600 | 0.66033100  | 0.56824400  |
| C | -2.56507800 | 4.51572600  | 0.57891500  |
| H | -3.94824100 | 4.23731900  | -1.04535800 |
| C | -1.73543000 | 3.89500300  | 1.50913200  |
| H | -0.97502600 | 2.00539800  | 2.22440900  |
| H | -2.66388700 | 5.59738800  | 0.57371300  |
| H | -1.19628900 | 4.48992100  | 2.24172800  |
| C | 0.94909800  | -3.30907200 | -0.83572900 |
| H | 1.51258200  | -3.52541100 | -1.75349200 |
| C | 1.85643900  | -3.55175400 | 0.36743800  |
| H | 1.21407400  | -3.80687000 | 1.22021300  |
| H | 2.52063400  | -4.41605000 | 0.21303600  |
| C | 2.67348100  | -2.31848400 | 0.75210600  |
| H | 3.33112400  | -2.55915200 | 1.59639400  |
| H | 1.97355800  | -1.55324700 | 1.10866900  |
| C | 3.49666800  | -1.74144500 | -0.40401600 |
| H | 4.32717100  | -2.42424900 | -0.63289900 |
| H | 2.87558800  | -1.70195700 | -1.30601500 |
| C | 4.03490400  | -0.34824100 | -0.15708000 |
| C | 4.13338300  | 0.55871800  | -1.21752100 |
| C | 4.41799700  | 0.08568500  | 1.11576200  |
| C | 4.61124500  | 1.85038300  | -1.02081600 |
| H | 3.81345900  | 0.24564700  | -2.20832000 |
| C | 4.89890500  | 1.37845000  | 1.31943200  |
| H | 4.34436200  | -0.59384500 | 1.96025400  |

|   |             |             |             |
|---|-------------|-------------|-------------|
| C | 4.99957400  | 2.26659300  | 0.25173800  |
| H | 4.68030500  | 2.53404300  | -1.86255600 |
| H | 5.19790400  | 1.69044300  | 2.31643400  |
| H | 5.37936900  | 3.27230100  | 0.40856300  |
| F | -0.04706100 | -4.34511700 | -0.77845100 |
| H | -2.29758000 | -1.62000500 | -2.53722800 |
| F | -2.86614500 | -1.05311900 | -0.69472100 |

**2a'-conformer-21**

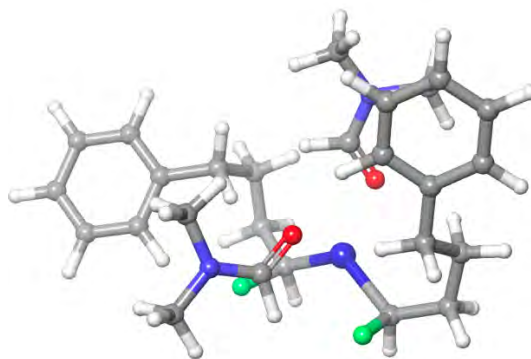

|    |             |             |             |
|----|-------------|-------------|-------------|
| Zn | -0.26484100 | -1.54796100 | 1.03901900  |
| O  | 0.00230100  | -0.53659400 | -0.86087500 |
| C  | 0.67741100  | -1.26373900 | -1.60998200 |
| N  | 1.54114100  | -0.80088200 | -2.51471200 |
| H  | 0.57027000  | -2.35296700 | -1.58236000 |
| O  | -1.29080500 | 0.16751200  | 1.64649100  |
| C  | -1.04897800 | 1.27021300  | 1.13469600  |

|   |             |             |             |
|---|-------------|-------------|-------------|
| N | -1.82398500 | 2.34337800  | 1.27664100  |
| H | -0.15426600 | 1.42779600  | 0.51855700  |
| C | 2.41284200  | -1.70100600 | -3.24337700 |
| H | 3.45548300  | -1.51306700 | -2.96448400 |
| H | 2.16183700  | -2.73338700 | -2.99479800 |
| H | 2.29999800  | -1.55169900 | -4.32196400 |
| C | 1.77038500  | 0.62200900  | -2.69106100 |
| H | 1.00959800  | 1.16923100  | -2.13493000 |
| H | 2.76442300  | 0.89613900  | -2.31905200 |
| H | 1.70149200  | 0.87182900  | -3.75454800 |
| C | -3.11367800 | 2.25829900  | 1.94116300  |
| H | -3.90602400 | 2.47747600  | 1.21685900  |
| H | -3.24131000 | 1.24899900  | 2.32915700  |
| H | -3.15560400 | 2.98027300  | 2.76297300  |
| C | -1.46809200 | 3.61815300  | 0.68882900  |
| H | -0.53996100 | 3.51594800  | 0.12136300  |
| H | -2.26553300 | 3.94831700  | 0.01656300  |
| H | -1.32511600 | 4.37038600  | 1.47177800  |
| C | 1.72206400  | -1.74012500 | 1.55495100  |
| C | 2.58484600  | -0.78359800 | 2.36267800  |
| H | 2.39251100  | -0.99377800 | 3.42355900  |
| H | 3.64813900  | -1.01116100 | 2.18956800  |
| C | 2.33339000  | 0.70655300  | 2.12706200  |
| H | 2.97745400  | 1.30672300  | 2.78333600  |
| H | 1.29604200  | 0.92388800  | 2.41507400  |

|   |             |             |             |
|---|-------------|-------------|-------------|
| C | 2.54503000  | 1.15538800  | 0.67157500  |
| H | 1.98958900  | 0.47337700  | 0.02046800  |
| H | 2.11371800  | 2.15862600  | 0.54018900  |
| C | 3.99507900  | 1.20736700  | 0.24867100  |
| C | 4.62892300  | 0.09574700  | -0.31880900 |
| C | 4.73910900  | 2.37709400  | 0.42853200  |
| C | 5.96763700  | 0.15983100  | -0.69939800 |
| H | 4.06325800  | -0.82448600 | -0.43131300 |
| C | 6.07759200  | 2.44261400  | 0.05191500  |
| H | 4.25821300  | 3.24885200  | 0.86789800  |
| C | 6.69643400  | 1.33244900  | -0.51751500 |
| H | 6.44473200  | -0.71343500 | -1.13539900 |
| H | 6.63650500  | 3.36223900  | 0.19860200  |
| H | 7.73944300  | 1.38112500  | -0.81519000 |
| C | -1.49164700 | -3.11283500 | 0.54318100  |
| H | -1.08728600 | -4.06253300 | 0.92142100  |
| C | -2.98136600 | -3.11636300 | 0.84666900  |
| H | -3.47304100 | -3.87392700 | 0.21564700  |
| H | -3.11295700 | -3.44037500 | 1.88808000  |
| C | -3.68371000 | -1.76762700 | 0.66481800  |
| H | -3.31311600 | -1.06664600 | 1.42190100  |
| H | -4.76095100 | -1.88862500 | 0.84004000  |
| C | -3.43976000 | -1.16567400 | -0.72247000 |
| H | -2.36529500 | -1.15621500 | -0.92410600 |
| H | -3.87945300 | -1.83070400 | -1.47952200 |

|   |             |             |             |
|---|-------------|-------------|-------------|
| C | -3.98385700 | 0.23079700  | -0.90829300 |
| C | -5.30013800 | 0.56441300  | -0.56707900 |
| C | -3.18056400 | 1.22709800  | -1.47330500 |
| C | -5.80141100 | 1.84381500  | -0.79270300 |
| H | -5.94566200 | -0.19329800 | -0.13073000 |
| C | -3.68112100 | 2.50551800  | -1.71590000 |
| H | -2.15287800 | 0.98024400  | -1.73607100 |
| C | -4.99422300 | 2.82157800  | -1.37265500 |
| H | -6.82834700 | 2.07602800  | -0.52557900 |
| H | -3.04788800 | 3.25339700  | -2.18685300 |
| H | -5.38836300 | 3.81506300  | -1.56476800 |
| F | -1.36223700 | -3.23379000 | -0.88941800 |
| H | 1.86174400  | -2.73404100 | 2.00252300  |
| F | 2.35097000  | -1.88614400 | 0.25096800  |

**2a'-conformer-22**

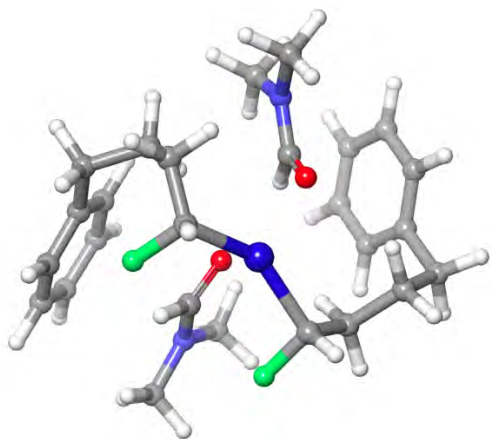

|    |             |             |             |
|----|-------------|-------------|-------------|
| Zn | 0.03157000  | 0.10252900  | -2.00357600 |
| O  | -0.52680700 | 0.51145000  | 0.06435200  |
| C  | -1.48815600 | 1.29304700  | -0.03706200 |
| N  | -1.69634400 | 2.31890300  | 0.78470700  |
| H  | -2.24649800 | 1.15930600  | -0.81787700 |
| O  | 1.56446900  | -1.20054500 | -1.27604600 |
| C  | 1.51054800  | -1.51435200 | -0.07911000 |
| N  | 1.67977000  | -2.76377500 | 0.36783100  |
| H  | 1.30270000  | -0.77102300 | 0.70278500  |
| C  | -2.71504400 | 3.30320200  | 0.49445500  |
| H  | -2.25056500 | 4.23919600  | 0.16509100  |
| H  | -3.36183700 | 2.92967600  | -0.30137900 |
| H  | -3.32340100 | 3.48717500  | 1.38599500  |
| C  | -0.76195500 | 2.61446300  | 1.84995300  |
| H  | -0.09922300 | 1.75831400  | 1.97829100  |



|   |             |             |             |
|---|-------------|-------------|-------------|
| H | -0.16745700 | 3.50120600  | 1.59888400  |
| H | -1.31461600 | 2.79941400  | 2.77708600  |
| C | 1.44410400  | -3.10138400 | 1.75513700  |
| H | 2.33277400  | -3.56817500 | 2.19456800  |
| H | 1.21011500  | -2.19442600 | 2.31530500  |
| H | 0.60107500  | -3.79841600 | 1.83021700  |
| C | 1.92862700  | -3.85739400 | -0.55187600 |
| H | 2.12139000  | -3.44327700 | -1.54045600 |
| H | 2.79584800  | -4.43325700 | -0.21305300 |
| H | 1.05643000  | -4.52003700 | -0.59647000 |
| C | 0.71060600  | 2.00311400  | -2.24301600 |
| C | 1.78213800  | 2.38132500  | -1.23439800 |
| H | 1.86251900  | 3.47800100  | -1.14906000 |
| H | 1.48676800  | 2.00762100  | -0.24374600 |
| C | 3.14406500  | 1.80684400  | -1.61387400 |
| H | 3.50643400  | 2.30257000  | -2.52309200 |
| H | 3.04170100  | 0.73985700  | -1.85106600 |
| C | 4.19667100  | 1.96998300  | -0.50430500 |
| H | 5.18976600  | 1.73996100  | -0.90681800 |
| H | 4.21895600  | 3.01741500  | -0.17892200 |
| C | 3.93442300  | 1.07579400  | 0.68360100  |
| C | 3.18032800  | 1.51244400  | 1.77729900  |
| C | 4.42919000  | -0.23237100 | 0.70351500  |
| C | 2.93843100  | 0.67470600  | 2.86473200  |
| H | 2.79014100  | 2.52766400  | 1.77858600  |

|   |             |             |             |
|---|-------------|-------------|-------------|
| C | 4.19923200  | -1.07207900 | 1.79007600  |
| H | 5.01065900  | -0.58980700 | -0.14336100 |
| C | 3.45691400  | -0.61858100 | 2.87924200  |
| H | 2.36138400  | 1.03990200  | 3.70965100  |
| H | 4.60756000  | -2.07950500 | 1.78964900  |
| H | 3.29005500  | -1.26553900 | 3.73596800  |
| C | -1.46663000 | -1.16515100 | -2.55238000 |
| H | -1.56456600 | -1.26749500 | -3.64147800 |
| C | -1.41567500 | -2.56906200 | -1.96356500 |
| H | -2.16919300 | -3.23334700 | -2.41771600 |
| H | -0.43312300 | -2.98908500 | -2.22177500 |
| C | -1.60842200 | -2.60590500 | -0.44128900 |
| H | -1.01485900 | -1.80587500 | 0.01391800  |
| H | -1.22281700 | -3.55734200 | -0.04996300 |
| C | -3.08787800 | -2.43824400 | -0.01077200 |
| H | -3.71586200 | -2.35639100 | -0.90077300 |
| H | -3.41719100 | -3.33921400 | 0.52247300  |
| C | -3.35971400 | -1.24945100 | 0.88160800  |
| C | -2.65073700 | -1.07142600 | 2.07465800  |
| C | -4.35056900 | -0.31864500 | 0.56000700  |
| C | -2.93778600 | -0.01425200 | 2.93259300  |
| H | -1.86457900 | -1.77820000 | 2.33391900  |
| C | -4.65349200 | 0.73481400  | 1.42169800  |
| H | -4.88702600 | -0.42700300 | -0.37877800 |
| C | -3.95211400 | 0.88790600  | 2.61464600  |

|   |             |             |             |
|---|-------------|-------------|-------------|
| H | -2.37861200 | 0.09950600  | 3.85740500  |
| H | -5.43932300 | 1.43778000  | 1.15816400  |
| H | -4.19079000 | 1.70429000  | 3.29118200  |
| F | -2.71583600 | -0.58523000 | -2.12967600 |
| H | 1.02755200  | 2.34706000  | -3.23650900 |
| F | -0.43164400 | 2.81594500  | -1.91512700 |

**2a'-conformer-23**

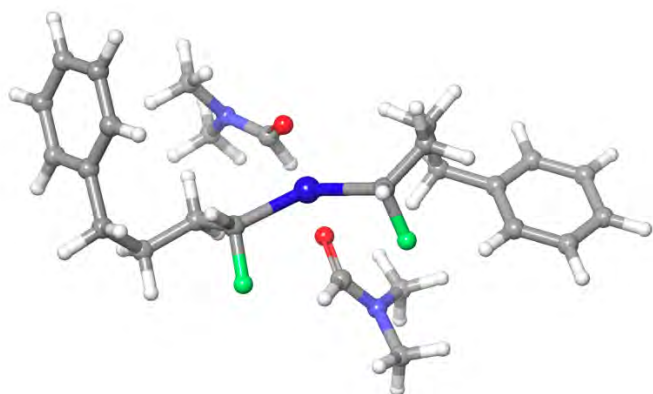

|    |             |             |             |
|----|-------------|-------------|-------------|
| Zn | -0.07544200 | 0.27389100  | -0.95066300 |
| O  | 0.75299800  | 0.76205400  | 1.01894500  |
| C  | 1.33019500  | 1.84951400  | 0.85274500  |
| N  | 2.43795800  | 2.21801200  | 1.49856800  |
| H  | 0.92451900  | 2.60216700  | 0.16542300  |
| O  | -0.85967600 | -1.52473200 | -0.15674700 |
| C  | -1.07993600 | -1.56479700 | 1.06175200  |
| N  | -2.20128800 | -2.04216400 | 1.60576900  |

|   |             |             |             |
|---|-------------|-------------|-------------|
| H | -0.34220400 | -1.18921400 | 1.78359600  |
| C | 3.15593600  | 3.41619200  | 1.11182700  |
| H | 4.11741900  | 3.14476600  | 0.66238100  |
| H | 2.57018900  | 3.97307700  | 0.37872700  |
| H | 3.33670400  | 4.04982700  | 1.98584800  |
| C | 3.09465100  | 1.33444000  | 2.44580900  |
| H | 2.42791200  | 0.50144900  | 2.66462800  |
| H | 4.02991900  | 0.94981800  | 2.02218900  |
| H | 3.31525500  | 1.88678300  | 3.36469500  |
| C | -3.32506900 | -2.44561400 | 0.77463200  |
| H | -4.16874500 | -1.76317700 | 0.93269600  |
| H | -3.02069100 | -2.40399800 | -0.27005000 |
| H | -3.63309200 | -3.46334900 | 1.03413800  |
| C | -2.43892200 | -1.95430600 | 3.03243300  |
| H | -1.53026300 | -1.62273100 | 3.53848900  |
| H | -3.24233400 | -1.23693200 | 3.23508800  |
| H | -2.72978400 | -2.93228800 | 3.42776100  |
| C | 1.66129800  | 0.18762700  | -2.02060000 |
| C | 2.47694100  | -1.08345900 | -2.19984100 |
| H | 2.00058700  | -1.65245200 | -3.01026800 |
| H | 3.48812000  | -0.82836400 | -2.55314600 |
| C | 2.57056300  | -1.99365300 | -0.97361200 |
| H | 3.11306400  | -2.91295100 | -1.23215700 |
| H | 1.55355000  | -2.28784500 | -0.68452200 |
| C | 3.24581100  | -1.33843800 | 0.24243000  |

|   |             |             |             |
|---|-------------|-------------|-------------|
| H | 2.75815900  | -0.37824500 | 0.42210700  |
| H | 3.06593900  | -1.96283100 | 1.12750400  |
| C | 4.73491600  | -1.14001400 | 0.08517900  |
| C | 5.25846100  | 0.03912100  | -0.45810200 |
| C | 5.62643500  | -2.14543800 | 0.47137300  |
| C | 6.63411600  | 0.20559300  | -0.60371800 |
| H | 4.56812400  | 0.81019200  | -0.78833300 |
| C | 7.00104600  | -1.98305800 | 0.32496800  |
| H | 5.23285100  | -3.06663100 | 0.89636200  |
| C | 7.51047800  | -0.80292900 | -0.21166300 |
| H | 7.02244200  | 1.12647800  | -1.02970900 |
| H | 7.67567800  | -2.77621300 | 0.63418500  |
| H | 8.58245800  | -0.67179300 | -0.32439100 |
| C | -1.68460900 | 1.51213900  | -0.78954200 |
| H | -2.33204900 | 1.59076200  | -1.67478600 |
| C | -2.54592400 | 1.18983200  | 0.42026200  |
| H | -2.95315200 | 0.17907200  | 0.28220900  |
| H | -1.90099100 | 1.14959700  | 1.31144800  |
| C | -3.70141400 | 2.15981400  | 0.68596400  |
| H | -3.30582400 | 3.18052800  | 0.71710800  |
| H | -4.14150500 | 1.95268000  | 1.67131500  |
| C | -4.81415600 | 2.08381000  | -0.37329500 |
| H | -5.59412500 | 2.81382300  | -0.12649200 |
| H | -4.41015200 | 2.37218700  | -1.34932700 |
| C | -5.42945300 | 0.70732900  | -0.47014800 |

|   |             |             |             |
|---|-------------|-------------|-------------|
| C | -5.12323200 | -0.15371000 | -1.52741100 |
| C | -6.30071300 | 0.24824200  | 0.52419400  |
| C | -5.68015300 | -1.42946700 | -1.60040500 |
| H | -4.44184500 | 0.18490300  | -2.30464300 |
| C | -6.86074300 | -1.02496600 | 0.45762000  |
| H | -6.55267600 | 0.90735600  | 1.35252200  |
| C | -6.55313600 | -1.86949000 | -0.60852900 |
| H | -5.43379700 | -2.07794500 | -2.43623600 |
| H | -7.54579500 | -1.35556100 | 1.23310900  |
| H | -6.99500000 | -2.85959500 | -0.66722100 |
| F | -1.19090600 | 2.84565900  | -0.57834200 |
| H | 1.52373200  | 0.62006900  | -3.02036200 |
| F | 2.50724900  | 1.16261300  | -1.35564500 |
